# Supplementary material for: Identifying lncRNA–miRNA–mRNA networks to investigate Alzheimer’s disease pathogenesis and therapy strategy
Source: Aging (Albany NY). 2020 Feb 7;12(3):2897–920. doi: 10.18632/aging.102785 (PMC7041741; doi:10.18632/aging.102785)
Supplement: Supplementary Table 1 [file aging-12-102785-s004..xlsx]

## Sheet: Supplemental_Table_S1
Supplementary Table S1. Differentially expressed lncRNAs between the APP/PS1 and Wild type mice at 6 months.
transcript_id	Readcount_AD_6m	Readcount_WT_6m	log2FoldChange	pvalue	padj	significant
LNC_006821	0	3.77062	-10.4397	6.49e-12	2.15e-08	TRUE
LNC_000433	2.31184	0	10.0924	7.64e-10	1.79e-06	TRUE
LNC_005400	1.5191	0	9.47769	3.61e-09	7.11e-06	TRUE
LNC_005905	0	2.10122	-9.57096	7.77e-09	1.4e-05	TRUE
LNC_005904	1.1717	0	9.05226	3.5e-08	5.13e-05	TRUE
ENSMUST00000229610.1	2.24349	0.0271281	6.69302	4.57e-08	6.56e-05	TRUE
LNC_003828	12.0113	0	12.5799	2.02e-07	0.00020885	TRUE
LNC_003430	0	1.29571	-8.85521	2.3e-07	0.000230086	TRUE
LNC_000721	0	9.64309	-11.8191	1.11e-06	0.000865029	TRUE
LNC_000420	0.0302729	1.83531	-5.56108	1.53e-06	0.00105907	TRUE
LNC_006725	0.846048	0.00678202	6.7644	4.92e-06	0.00274809	TRUE
LNC_001173	2.78487	0.138785	4.53502	7.9e-06	0.00363465	TRUE
LNC_006788	1.78288	0	9.55537	9.42e-06	0.00412134	TRUE
LNC_005811	2.48597	0	10.0319	2.19e-05	0.00786464	TRUE
LNC_000033	1.75287	0	9.529	2.87e-05	0.00962068	TRUE
LNC_000720	0	27.0255	-13.2001	3.26e-05	0.0105401	TRUE
LNC_006081	3.42121	0	10.4919	3.58e-05	0.0111349	TRUE
LNC_006082	0.0876738	3.89065	-5.17168	3.75e-05	0.0116047	TRUE
LNC_001397	0	0.449773	-7.44279	3.9e-05	0.0119527	TRUE
LNC_003323	0.572115	0.013564	5.56819	4.37e-05	0.0128824	TRUE
LNC_000719	24.1544	0	13.3107	6.32e-05	0.016474	TRUE
LNC_004043	0.506947	0.0203461	4.94772	7.78e-05	0.0192322	TRUE
LNC_001817	17.2716	0	12.8269	8.51e-05	0.0199766	TRUE
LNC_003169	0.00678202	1.98183	-7.70229	9.79e-05	0.0221312	TRUE
ENSMUST00000151069.1	0	0.364752	-7.21254	0.000101761	0.0227816	TRUE
LNC_006818	2.36174	0	10.4736	0.000107759	0.0236827	TRUE
LNC_006285	0.786336	0	8.68396	0.000157741	0.0314858	TRUE
LNC_004790	0.781373	0	8.66911	0.000161743	0.0320817	TRUE
LNC_002933	0	1.05591	-8.96702	0.000170445	0.0331169	TRUE
ENSMUST00000209493.1	0	1.03765	-8.45524	0.000189995	0.0353509	TRUE
LNC_002934	0	0.82934	-8.44772	0.000219061	0.0394756	TRUE
LNC_002208	0.0944558	1.45965	-3.6032	0.000246987	0.0425648	TRUE
LNC_000161	0.0176181	2.1726	-6.51728	0.000250964	0.0431323	TRUE
LNC_005344	6.00887	0	11.304	0.000259946	0.0437013	TRUE
LNC_005576	0.692032	0	8.19268	0.000301506	0.0488881	TRUE
LNC_003164	4.8066	0.0533469	6.65396	0.000318944	0.0506735	TRUE
LNC_003197	0.700216	0	8.20914	0.000346125	0.0532859	TRUE
LNC_004802	0	0.724957	-8.19503	0.00034729	0.0532976	TRUE
LNC_000578	0	6.7142	-11.1914	0.00034828	0.0533198	TRUE
ENSMUST00000170849.7	0.106201	1.75317	-3.66402	0.000360903	0.0540712	TRUE
LNC_000169	0	0.764399	-8.15128	0.000412583	0.0598245	TRUE
LNC_001186	0.215964	0	6.7877	0.000477848	0.0652386	TRUE
LNC_002205	6.19199	0.00678202	9.57064	0.000580755	0.0761562	TRUE
ENSMUST00000123998.1	2.4313	0	10.0003	0.000717686	0.0901753	TRUE
LNC_004561	0.371875	0.0194368	4.35318	0.000850154	0.102655	TRUE
LNC_003401	0.0732004	4.70987	-5.45968	0.00089586	0.106215	TRUE
LNC_002456	1.1656	0	8.94384	0.000937268	0.109337	TRUE
LNC_000245	0	3.03156	-9.95366	0.000950771	0.110544	TRUE
LNC_001678	0.375853	0	7.53763	0.00112191	0.12333	TRUE
LNC_006817	1.49754	0	9.81904	0.00113086	0.123835	TRUE
LNC_000494	1.50569	0.0813843	4.80537	0.00116195	0.126362	TRUE
LNC_003168	0	0.450872	-7.79378	0.00117651	0.127505	TRUE
LNC_001994	0	1.34871	-8.79139	0.00119231	0.127994	TRUE
LNC_003067	1.47992	0	9.28569	0.00134803	0.138031	TRUE
LNC_003882	0.0194368	1.03996	-5.6886	0.00138605	0.141236	TRUE
LNC_003082	1.16867	0	9.46138	0.00151777	0.149818	TRUE
LNC_000816	0.00587271	0.425449	-5.17983	0.00164443	0.158113	TRUE
LNC_003206	1.32249	0	9.12245	0.00165444	0.158352	TRUE
LNC_001056	0	0.177166	-6.20475	0.00174295	0.164822	TRUE
ENSMUST00000185281.6	0.0645998	0.951492	-3.51576	0.00177485	0.16659	TRUE
LNC_000223	0.0126547	0.629819	-5.00982	0.00182219	0.169021	TRUE
LNC_001820	1.12169	0	8.88712	0.00192744	0.174423	TRUE
LNC_005078	5.28608	0.929403	2.89508	0.00203184	0.181527	TRUE
LNC_001012	0.0117454	0.852716	-5.44457	0.00207814	0.184618	TRUE
LNC_006576	1.03947	0	8.77771	0.00213758	0.187521	TRUE
LNC_001450	1.00423	0	8.72816	0.00223016	0.193747	TRUE
LNC_001922	0	0.167239	-6.07747	0.00224134	0.193843	TRUE
LNC_003017	0.188836	0	6.58758	0.00225349	0.194179	TRUE
LNC_002841	0.480955	0.00587271	5.96086	0.00238072	0.202794	TRUE
LNC_000854	0.739961	0	8.80223	0.00269928	0.220255	TRUE
LNC_003971	0.13242	0	5.91297	0.00270428	0.220378	TRUE
LNC_004554	0.575563	0	7.93245	0.00286795	0.228693	TRUE
LNC_001741	0.84567	0	8.48132	0.00288502	0.228875	TRUE
LNC_001819	0.84567	0	8.48132	0.00288442	0.228875	TRUE
LNC_004303	0.131511	0	6.03014	0.00289201	0.228875	TRUE
LNC_004597	0	0.150531	-5.84017	0.00296809	0.231985	TRUE
LNC_006537	1.12907	0.0406921	4.96185	0.00309202	0.237262	TRUE
LNC_001455	0	1.17329	-8.58745	0.00313385	0.239497	TRUE
LNC_003458	5.74491	1.46802	2.16575	0.00330273	0.245873	TRUE
LNC_003826	9.86224	2.45005	2.33662	0.00331418	0.245932	TRUE
LNC_006386	0.123819	0	5.97841	0.00343943	0.253437	TRUE
LNC_006392	0	0.352665	-6.93713	0.00393595	0.275844	TRUE
LNC_002746	0.698548	0	8.20426	0.00409217	0.283641	TRUE
LNC_004490	0.252526	0	7.19975	0.00429711	0.2927	TRUE
LNC_006395	0	0.139202	-5.85748	0.00449674	0.301916	TRUE
ENSMUST00000124298.1	0.566242	0.0678202	3.39385	0.00464593	0.308141	TRUE
LNC_001838	0.00587271	1.19803	-7.16841	0.00477423	0.315324	TRUE
LNC_001066	0.00587271	1.43779	-7.08664	0.00503588	0.329159	TRUE
LNC_000703	0.318036	0	7.57461	0.00508657	0.331441	TRUE
LNC_000462	0.610382	0	8.01042	0.00510908	0.332565	TRUE
LNC_005416	0	0.793497	-8.11611	0.0051786	0.334895	TRUE
LNC_000429	0.376763	0.00587271	5.9346	0.00539153	0.344201	TRUE
LNC_006655	0.0985099	0	5.52349	0.00542116	0.344984	TRUE
LNC_001062	0.458071	0	8.11076	0.00553598	0.350584	TRUE
LNC_005303	0	0.130601	-5.83749	0.00561838	0.353307	TRUE
LNC_003999	0.416962	0	7.97523	0.00639473	0.385979	TRUE
LNC_006672	0.522216	0	7.78642	0.00661173	0.394265	TRUE
LNC_002992	0.124729	1.05735	-2.70731	0.00679811	0.398875	TRUE
LNC_000782	0.508652	0	7.74865	0.00687073	0.401438	TRUE
LNC_006257	0.116621	0	5.71154	0.00709728	0.410322	TRUE
LNC_001058	0.475689	0	7.65648	0.00719294	0.411879	TRUE
LNC_000053	0	0.155494	-5.95801	0.00722856	0.412244	TRUE
LNC_002825	0.657326	0.0388735	4.15162	0.00722377	0.412244	TRUE
LNC_001086	0.164436	0	6.39007	0.0074902	0.421825	TRUE
LNC_005109	0	0.458071	-7.85608	0.00750449	0.422253	TRUE
LNC_001624	0.807061	0.00678202	6.66629	0.00774002	0.431273	TRUE
LNC_002260	0	0.63751	-7.71182	0.00800411	0.438627	TRUE
LNC_001930	0	0.617164	-7.66534	0.00834955	0.453616	TRUE
LNC_002677	0	0.131094	-5.62945	0.00838803	0.454142	TRUE
LNC_003827	1.0982	21.1919	-4.06349	0.00909096	0.478242	TRUE
LNC_005135	0	0.115711	-5.55886	0.00912051	0.479081	TRUE
LNC_000007	0.157729	0	6.33407	0.00916354	0.479262	TRUE
LNC_002500	0.0962745	0	5.48191	0.0092155	0.480527	TRUE
LNC_001612	0	0.56969	-7.55068	0.00952467	0.489225	TRUE
LNC_004494	0.013564	0.215623	-3.60664	0.00953647	0.489433	TRUE
LNC_001051	0	0.105784	-5.3191	0.00997366	0.503271	TRUE
ENSMUST00000174467.1	0.0185274	0.314625	-3.63406	0.0100272	0.504914	TRUE
LNC_006639	0.582307	0.0126547	5.34512	0.0101746	0.509739	TRUE
ENSMUST00000139095.1	2.12376	0.403208	2.9802	0.0102989	0.512711	TRUE
LNC_002078	2.73418	0.329591	3.34356	0.0105218	0.520536	TRUE
LNC_002771	0.157237	0	6.47181	0.0105304	0.520536	TRUE
LNC_006234	0.0126547	0.412908	-4.97748	0.0108419	0.53012	TRUE
LNC_002639	4.00227	1.07614	2.10703	0.0109573	0.534517	TRUE
LNC_002679	0.164019	0	6.14473	0.0110172	0.536194	TRUE
LNC_000520	0	0.358235	-7.50218	0.0111118	0.538094	TRUE
LNC_002827	0.113476	1.10979	-3.07401	0.0111159	0.538094	TRUE
LNC_003732	0.293635	0	7.47001	0.0114206	0.548299	TRUE
LNC_006097	0	0.0953651	-5.30902	0.0115637	0.55298	TRUE
LNC_002163	0.287763	0	7.4409	0.011674	0.555532	TRUE
LNC_005587	0.00587271	0.834189	-6.11634	0.0116787	0.555532	TRUE
LNC_001451	0.809107	0.0320915	4.66342	0.0117671	0.557384	TRUE
ENSMUST00000190612.1	0	0.311064	-6.78693	0.0118263	0.55918	TRUE
LNC_004760	0.190655	0.013564	4.11664	0.0122128	0.572305	TRUE
LNC_004062	11.5966	4.54115	1.58326	0.0123298	0.57567	TRUE
LNC_001561	0.215206	0	6.51907	0.01252	0.582802	TRUE
LNC_004064	0.340617	0	7.17918	0.0126268	0.585183	TRUE
LNC_002741	0	0.164019	-6.2632	0.0128161	0.589448	TRUE
LNC_002346	0.26162	0.0397828	2.92101	0.0129663	0.593963	TRUE
LNC_001113	0.347209	0.0185274	4.09333	0.0130263	0.595852	TRUE
LNC_002661	0.0799825	0	5.21852	0.0133271	0.604754	TRUE
LNC_004601	0.0849459	0	5.50768	0.0136094	0.613592	TRUE
LNC_006544	0.19486	0	6.4122	0.0140605	0.626761	TRUE
LNC_000061	0	0.0931297	-5.12145	0.0141821	0.630399	TRUE
LNC_002638	0.142839	0	5.9423	0.0145174	0.640338	TRUE
LNC_001660	0.90792	4.93307	-2.42821	0.0149773	0.651512	TRUE
LNC_003966	0.299508	0	6.99583	0.0151799	0.657154	TRUE
LNC_000681	0.117947	0	5.97172	0.01551	0.665612	TRUE
LNC_003933	0.470726	0.0194368	5.03807	0.0155002	0.665612	TRUE
LNC_005732	0.109346	0.00678202	3.91843	0.0155869	0.667395	TRUE
LNC_002350	0.0691464	0	5.05211	0.0157464	0.670228	TRUE
LNC_003460	1.83736	7.47311	-1.65071	0.0156852	0.670228	TRUE
LNC_000034	0.184858	2.17108	-3.14223	0.0159342	0.675893	TRUE
LNC_001141	0	0.413703	-7.09303	0.0160318	0.678662	TRUE
LNC_006482	0.481562	0.0262188	4.72914	0.0161758	0.682923	TRUE
LNC_001065	1.559	0.12704	3.81698	0.0162067	0.683526	TRUE
LNC_003195	0.111581	0	5.91316	0.0167474	0.699564	TRUE
LNC_005818	0.113893	0.00587271	3.86411	0.0167832	0.699756	TRUE
LNC_000067	0.258399	0.00587271	4.96435	0.016857	0.701818	TRUE
LNC_006737	0	0.106694	-5.31347	0.0169869	0.706293	TRUE
ENSMUST00000144366.7	0	0.138293	-5.8683	0.0171408	0.71082	TRUE
LNC_000152	0.0913111	0	5.34796	0.0171554	0.710956	TRUE
LNC_004418	0	0.393357	-7.021	0.0172942	0.714212	TRUE
LNC_002217	0.0361456	0.817708	-4.28194	0.0173529	0.71538	TRUE
LNC_000248	0.381385	0.0836197	2.37737	0.0175685	0.72238	TRUE
LNC_003686	0.270145	0	6.8489	0.0182409	0.738474	TRUE
LNC_003825	28.7194	14.5003	1.2278	0.0183445	0.741771	TRUE
LNC_000868	0.124312	0	5.86857	0.0186207	0.748135	TRUE
LNC_003838	0.20975	0.0126547	3.8901	0.018644	0.748135	TRUE
LNC_006292	0	0.155987	-5.77237	0.0190496	0.758558	TRUE
LNC_001001	0	0.0759284	-5.0032	0.0191198	0.758838	TRUE
LNC_006277	1.56866	0.217025	3.41071	0.0191401	0.758838	TRUE
LNC_004377	0.0700557	0	5.06558	0.0192431	0.761454	TRUE
LNC_003876	0.077747	0	5.1646	0.0194235	0.763758	TRUE
LNC_006342	0.077747	0	5.1646	0.0194326	0.763758	TRUE
LNC_002211	0.479895	0.130185	2.17005	0.0195924	0.766619	TRUE
LNC_000789	0.280147	0.0388735	3.27616	0.0201747	0.780687	TRUE
LNC_004175	0	0.352665	-6.8652	0.0203532	0.785818	TRUE
LNC_004177	0	0.0759284	-4.99844	0.020395	0.785838	TRUE
LNC_003754	0	0.142423	-5.62732	0.0206888	0.793761	TRUE
LNC_004293	0.0673277	0	4.99244	0.0209099	0.798844	TRUE
LNC_002112	0.107527	0.00678202	3.97493	0.0210572	0.80231	TRUE
LNC_001754	0	0.0786563	-4.94101	0.0212324	0.804836	TRUE
LNC_004872	0.199672	0	6.91486	0.0212558	0.805232	TRUE
ENSMUST00000182580.7	0.549458	2.81875	-2.18257	0.0215239	0.812947	TRUE
LNC_002908	0	0.0913111	-5.13888	0.0225905	0.844133	TRUE
LNC_002191	0.0939633	0	5.63713	0.0231774	0.857373	TRUE
LNC_002720	0	0.0795657	-4.89823	0.0232729	0.858947	TRUE
LNC_005582	0	0.077747	-4.96725	0.0240971	0.879586	TRUE
LNC_001156	0.0664184	0	4.97786	0.02442	0.889312	TRUE
ENSMUST00000173070.7	0.0790731	0.545631	-2.31737	0.0245292	0.892259	TRUE
LNC_002477	8.99331	24.4306	-1.18716	0.0250687	0.905481	TRUE
ENSMUST00000145191.1	0	0.107111	-5.52939	0.0252884	0.910847	TRUE
LNC_006313	0.0926372	0	5.64258	0.0254985	0.916861	TRUE
LNC_000885	0.21729	0	6.53952	0.0256431	0.91896	TRUE
LNC_001333	0.0564916	0	4.75269	0.0256707	0.91896	TRUE
LNC_002115	0.137383	0.0117454	3.32598	0.0256189	0.91896	TRUE
LNC_004379	0	0.0718743	-4.82373	0.0261454	0.928037	TRUE
LNC_003495	0.0320915	0.461178	-3.3253	0.0266491	0.941147	TRUE
LNC_005140	0.119273	0	5.69815	0.0269654	0.949133	TRUE
LNC_002181	0.170309	0	6.68619	0.0271995	0.95513	TRUE
LNC_003615	0.0352362	1.058	-4.07922	0.0276266	0.965399	TRUE
LNC_001222	0	0.0795657	-4.89142	0.027753	0.96821	TRUE
LNC_004071	0.0880906	0	5.44243	0.0278052	0.968957	TRUE
LNC_002930	0.00678202	0.239606	-4.44646	0.0280552	0.971995	TRUE
LNC_004738	0.099836	0	5.8646	0.0288781	0.9894	TRUE
ENSMUST00000130875.7	0.536235	0.104875	2.90581	0.029025	0.991204	TRUE
LNC_001528	0.0876738	0.00678202	3.62122	0.0292677	0.996255	TRUE
LNC_000130	0	0.0795657	-4.92486	0.0293489	0.997405	TRUE
ENSMUST00000128904.1	1.96205	0.604434	2.36981	0.0377217	1	TRUE
ENSMUST00000154354.1	0.363767	1.6575	-1.89946	0.0451994	1	TRUE
ENSMUST00000167642.7	0.662858	3.95104	-2.09254	0.0365071	1	TRUE
ENSMUST00000180663.7	0.0605457	0.576889	-2.76957	0.039247	1	TRUE
ENSMUST00000182259.7	0.797589	3.32884	-1.66705	0.0464291	1	TRUE
ENSMUST00000186535.1	7.53135	3.68048	1.29142	0.0435735	1	TRUE
ENSMUST00000192263.1	0.0583103	0.360622	-2.55439	0.0384569	1	TRUE
ENSMUST00000194628.1	0	0.108512	-5.24947	0.0331566	1	TRUE
ENSMUST00000200021.1	35.3384	9.49207	2.31147	0.0350616	1	TRUE
LNC_000200	0.0704725	0	5.0921	0.0481469	1	TRUE
LNC_000348	0.18213	0.0339101	2.77193	0.0483701	1	TRUE
LNC_000611	0.0849459	0	5.57643	0.0331906	1	TRUE
LNC_000741	0.294204	3.94714	-3.2633	0.0302773	1	TRUE
LNC_000752	0.969527	0.287497	2.06148	0.0414234	1	TRUE
LNC_000845	0	0.115294	-5.30616	0.042825	1	TRUE
LNC_000977	0.0822179	0	5.41983	0.0313759	1	TRUE
LNC_001008	0.112983	0.013564	3.27197	0.0429225	1	TRUE
LNC_001023	0.0704725	0	5.0921	0.0481491	1	TRUE
LNC_001246	0.00678202	0.182963	-4.55708	0.0448658	1	TRUE
LNC_001363	0.212402	0.0583103	2.08251	0.0469886	1	TRUE
LNC_001391	0.162769	0	6.12057	0.0428756	1	TRUE
LNC_001550	0	0.0669109	-4.6354	0.0411521	1	TRUE
LNC_001773	0.318604	0.0320915	3.29666	0.0430572	1	TRUE
LNC_001809	1.25377	0.0610382	4.63406	0.0305225	1	TRUE
LNC_001842	0	0.0727836	-4.77758	0.0329593	1	TRUE
LNC_001887	5.78477	1.04799	2.74328	0.0371306	1	TRUE
LNC_001942	0	0.064183	-4.73367	0.0372722	1	TRUE
LNC_001947	0	0.102147	-5.3763	0.0311961	1	TRUE
LNC_001975	3.59561	0.393357	3.88866	0.0340287	1	TRUE
LNC_001977	1.00488	0.357553	1.89901	0.0364937	1	TRUE
LNC_002167	0	0.113476	-5.33867	0.0423531	1	TRUE
LNC_002445	0.0555823	0	4.73811	0.0331284	1	TRUE
LNC_002551	0.123327	0	6.22267	0.045058	1	TRUE
LNC_002572	0.0645998	0	5.02099	0.0451627	1	TRUE
LNC_002685	0.117454	0	6.15266	0.047432	1	TRUE
LNC_002748	0	0.0515282	-4.40607	0.0488876	1	TRUE
LNC_002956	0.0691464	0	5.16723	0.041257	1	TRUE
LNC_002971	0.00587271	0.474742	-5.21642	0.0297982	1	TRUE
LNC_003019	0.146818	0	6.47295	0.0351447	1	TRUE
LNC_003185	0.8498	0.142423	3.09256	0.0351541	1	TRUE
LNC_003210	0.187093	0.0271281	3.20694	0.0304362	1	TRUE
LNC_003216	0.0117454	0.718895	-5.04565	0.0408612	1	TRUE
LNC_003265	0.0799825	0	5.44473	0.0324772	1	TRUE
LNC_003371	0.276017	0.00678202	5.10269	0.0398241	1	TRUE
LNC_003502	0	0.105784	-5.2821	0.0414909	1	TRUE
LNC_003967	0.317126	0.0203461	4.53456	0.0424785	1	TRUE
LNC_003980	0.164436	0	6.14504	0.0386557	1	TRUE
LNC_004057	0.235818	0.0203461	3.69499	0.0327237	1	TRUE
LNC_004100	0.227861	0.0271281	3.24653	0.0446445	1	TRUE
LNC_004121	0.662668	0.164095	2.32066	0.0403515	1	TRUE
LNC_004148	0.806607	0.114385	3.10363	0.0338603	1	TRUE
LNC_004176	0.718933	0.189404	2.21193	0.0374015	1	TRUE
LNC_004319	0.013564	0.172695	-3.23891	0.0304234	1	TRUE
LNC_004404	2.76339	1.20796	1.67987	0.0485365	1	TRUE
LNC_004514	0.465763	0.0542562	3.81028	0.0443176	1	TRUE
LNC_004551	0	0.0949483	-5.04703	0.0474936	1	TRUE
LNC_004579	0.013564	0.332319	-4.02695	0.0495176	1	TRUE
LNC_004628	0.0704725	0	5.12942	0.0395097	1	TRUE
LNC_004707	2.42566	0.914513	1.73394	0.0466455	1	TRUE
LNC_004784	0.0605457	0	5.00663	0.0297863	1	TRUE
LNC_004801	1.83338	0.447614	2.49696	0.0449741	1	TRUE
LNC_004827	0	0.0727836	-4.80704	0.0345011	1	TRUE
LNC_005017	0.0488003	0	4.5739	0.0469732	1	TRUE
LNC_005043	0	0.104875	-5.30636	0.0384129	1	TRUE
LNC_005145	0	0.110748	-5.40836	0.0327162	1	TRUE
LNC_005402	0	0.10173	-5.15203	0.0383504	1	TRUE
LNC_005444	0.734391	0.0827104	3.18718	0.0375148	1	TRUE
LNC_005691	0.0632737	0	5.0202	0.0466745	1	TRUE
LNC_005857	0.0759284	0	5.27931	0.036069	1	TRUE
LNC_005889	0	0.112566	-5.36256	0.0375842	1	TRUE
LNC_006179	0.0645998	0	5.02099	0.0451529	1	TRUE
LNC_006588	2.7047	1.09069	1.64999	0.0351222	1	TRUE
LNC_006684	0.0176181	1.14616	-5.08255	0.03465	1	TRUE
LNC_006830	0.00678202	0.103056	-3.408	0.0307547	1	TRUE
LNC_006833	1.05425	0.359788	1.78639	0.0380094	1	TRUE
