# Supplementary material for: Identifying lncRNA–miRNA–mRNA networks to investigate Alzheimer’s disease pathogenesis and therapy strategy
Source: Aging (Albany NY). 2020 Feb 7;12(3):2897–920. doi: 10.18632/aging.102785 (PMC7041741; doi:10.18632/aging.102785)
Supplement: Supplementary Table 2 [file aging-12-102785-s007..xlsx]

## Sheet: Supplemental_Table_S2
Supplementary Table S2. Differentially expressed lncRNAs between the APP/PS1 and WT at 9 months.
transcript_id	Readcount_AD_9m	Readcount_WT_9m	log2FoldChange	pvalue	padj	significant
LNC_001213	0	8.26388	-11.7054	1.11357e-17	5.40295e-14	TRUE
LNC_000217	0.0864213	3.3932	-5.25153	2.65094e-07	0.000199057	TRUE
LNC_003826	18.4405	1.55282	3.57509	5.70423e-07	0.000399772	TRUE
LNC_003853	2.88323	0.0509925	5.91802	1.12646e-06	0.00074791	TRUE
LNC_001503	1.17981	0	8.78146	1.79201e-06	0.00111912	TRUE
LNC_005072	0.00728465	4.14437	-8.89235	4.27246e-06	0.00236391	TRUE
LNC_001818	0	6.05287	-11.2984	4.40465e-06	0.00239643	TRUE
LNC_002400	0.0418681	6.03293	-7.05495	1.14112e-05	0.00541542	TRUE
LNC_005231	0	2.94902	-10.0322	1.43277e-05	0.0065487	TRUE
LNC_003082	3.19796	0	10.2107	1.49564e-05	0.00664437	TRUE
LNC_005067	0.0145693	1.98675	-6.76045	2.56905e-05	0.0101914	TRUE
LNC_004679	5.05841	0.020934	7.8691	2.60886e-05	0.0102846	TRUE
LNC_002317	0.430416	0	7.39443	3.57085e-05	0.0129443	TRUE
LNC_002620	0.00636474	2.00529	-7.6263	3.99614e-05	0.0141605	TRUE
LNC_001441	2.88472	0	10.0339	5.96081e-05	0.0188934	TRUE
LNC_005905	0	1.42245	-9.01025	7.06287e-05	0.0215213	TRUE
LNC_001502	0	1.50004	-9.0517	7.53566e-05	0.0226124	TRUE
LNC_001661	0	0.363785	-7.24638	7.9516e-05	0.0231128	TRUE
LNC_000719	24.1996	0	13.091	9.2633e-05	0.0260371	TRUE
LNC_003434	1.13213	0.063722	4.20016	0.000182538	0.0412673	TRUE
LNC_003568	0.863442	0	8.45539	0.00019927	0.0441016	TRUE
LNC_003828	0.0364232	6.18094	-7.50357	0.000208645	0.0454904	TRUE
LNC_004117	0.283107	0	6.81784	0.000301114	0.0604257	TRUE
LNC_003369	0	0.817348	-8.23527	0.00031794	0.0628654	TRUE
LNC_002639	0.0282187	1.96574	-5.97994	0.000324526	0.0634543	TRUE
LNC_002314	0.730479	0	8.21534	0.000339543	0.0645673	TRUE
LNC_002770	0.294767	0	6.89465	0.00034523	0.0651958	TRUE
LNC_005344	0	5.31456	-11.0945	0.000377392	0.0687976	TRUE
LNC_005746	0	1.25381	-8.721	0.000479134	0.0780915	TRUE
LNC_003966	0.684757	0	8.00383	0.000506775	0.0810233	TRUE
LNC_005327	0.0218539	1.93672	-6.14252	0.000538453	0.0849073	TRUE
LNC_001741	0	2.24275	-9.53998	0.000580948	0.0891565	TRUE
LNC_005054	0	0.225675	-6.43764	0.00059732	0.0907854	TRUE
LNC_005106	0	0.211106	-6.342	0.000626499	0.0936408	TRUE
LNC_002401	3.11552	0.208346	3.92123	0.000640403	0.0948633	TRUE
LNC_002299	3.5112	0	10.476	0.000687746	0.0999159	TRUE
LNC_006544	0.641049	0	7.897	0.000712746	0.102407	TRUE
LNC_006819	2.9787	0	10.2395	0.000730312	0.102917	TRUE
LNC_001552	0.376589	0	7.22329	0.000769009	0.105736	TRUE
LNC_002985	0.633765	0	7.98288	0.000823873	0.111754	TRUE
LNC_006788	0	2.41224	-10.0962	0.000927912	0.119935	TRUE
LNC_001501	2.27858	0	9.85337	0.00101027	0.127279	TRUE
LNC_003882	0.0282187	1.3765	-5.30218	0.00116712	0.13882	TRUE
LNC_000790	2.19996	0	9.80195	0.00119211	0.139504	TRUE
LNC_006257	0	0.181967	-6.14327	0.0013825	0.151391	TRUE
ENSMUST00000167899.2	1.1056	0.046393	4.43278	0.00147808	0.157483	TRUE
LNC_006392	0.458933	0	7.42104	0.00156802	0.163476	TRUE
LNC_001277	0	0.151909	-5.95413	0.00159951	0.165663	TRUE
LNC_001888	3.55153	0.0127295	7.81296	0.00173625	0.174942	TRUE
LNC_004072	0.405653	0	7.33826	0.00189491	0.182755	TRUE
LNC_000946	0	0.163718	-6.06068	0.0020298	0.190759	TRUE
LNC_001391	0	0.362094	-7.20138	0.00204941	0.191753	TRUE
LNC_001455	0	1.58805	-9.04194	0.00205205	0.191753	TRUE
LNC_001575	0.479196	0	7.60895	0.00206105	0.192309	TRUE
LNC_003173	2.47492	0.0864959	5.03826	0.00214168	0.196558	TRUE
LNC_003265	0.147458	0	5.85439	0.00216821	0.197916	TRUE
LNC_003903	1.20197	0	8.76305	0.00258093	0.220586	TRUE
LNC_000403	1.04382	0	8.72932	0.00267095	0.225831	TRUE
LNC_002156	0.318386	0	6.97477	0.00275083	0.22975	TRUE
ENSMUST00000199309.4	0	1.26024	-8.70933	0.00276722	0.230571	TRUE
LNC_005371	0.0345834	0.885595	-4.52481	0.00298573	0.24426	TRUE
LNC_004064	0.505724	0.00728465	5.82358	0.00313814	0.25119	TRUE
LNC_003650	0.147384	0	5.89784	0.00338017	0.26289	TRUE
LNC_006772	0.0263789	0.993323	-4.88043	0.00355078	0.271473	TRUE
LNC_004718	0	0.814687	-8.53182	0.00359018	0.274153	TRUE
LNC_004298	0	0.795593	-8.49766	0.00368607	0.279446	TRUE
LNC_000471	0.512387	0.0364232	3.93332	0.0037408	0.281565	TRUE
LNC_004563	0.311326	0	6.86187	0.00390329	0.287617	TRUE
LNC_000132	0.266623	0	6.76769	0.0039696	0.29013	TRUE
LNC_001162	0.135649	0	5.74877	0.00420282	0.301242	TRUE
LNC_006453	0.147384	0	5.88401	0.00424921	0.303532	TRUE
LNC_002181	0	0.700122	-8.3136	0.00443955	0.313929	TRUE
LNC_002006	1.66818	0.0127295	6.52092	0.00447108	0.315451	TRUE
LNC_004084	0	0.888727	-8.20734	0.00457424	0.318807	TRUE
LNC_000703	0.258344	0	6.67822	0.00472341	0.327498	TRUE
ENSMUST00000182656.7	0.0891064	2.0083	-4.37475	0.00481	0.332301	TRUE
LNC_003933	0.155663	0	5.89249	0.00485783	0.334141	TRUE
LNC_003377	0.123764	0	5.64723	0.0049674	0.338434	TRUE
LNC_003165	0.668298	0	8.08829	0.00510975	0.341843	TRUE
LNC_005889	0.0218539	0.384794	-4.06498	0.00563999	0.365614	TRUE
LNC_006053	0.181196	0	6.10007	0.0057421	0.369575	TRUE
LNC_000764	0.887807	0.020934	5.36051	0.0059485	0.378992	TRUE
LNC_000265	0.152903	0	5.96392	0.00603429	0.383158	TRUE
LNC_001678	0	0.248225	-6.70937	0.00614143	0.387371	TRUE
LNC_000681	0.233109	0	6.48867	0.00618634	0.388262	TRUE
LNC_002868	0	0.11464	-5.49259	0.00638038	0.396105	TRUE
LNC_004314	0.604626	0	7.94148	0.00657664	0.40471	TRUE
LNC_005267	0.111955	0	5.45627	0.00663485	0.406304	TRUE
LNC_003169	0	0.684757	-7.83308	0.0068117	0.413535	TRUE
LNC_005860	0.619195	0	7.80964	0.00690647	0.417266	TRUE
LNC_001601	0.307348	0	6.97526	0.00692843	0.418192	TRUE
LNC_003069	2.30702	0.221075	3.41768	0.00700587	0.422462	TRUE
LNC_004640	0.120085	0	5.61143	0.0072189	0.432243	TRUE
LNC_002906	0.350981	0	7.1619	0.00736862	0.43651	TRUE
LNC_001116	0.10927	1.59981	-3.86052	0.00759832	0.444174	TRUE
LNC_004317	0.21655	2.35073	-3.4384	0.00807945	0.462442	TRUE
LNC_005622	0.524495	0	7.737	0.00839717	0.475859	TRUE
ENSMUST00000153113.1	0.51721	0	7.71688	0.00855826	0.482406	TRUE
LNC_001141	0.483721	0	7.62436	0.00861843	0.484498	TRUE
LNC_004456	0.0145693	0.25643	-4.05198	0.00888809	0.494617	TRUE
LNC_003118	0	0.582772	-7.60184	0.00892347	0.495029	TRUE
LNC_005632	0	0.103676	-5.46285	0.00910481	0.499076	TRUE
LNC_005792	0	0.458262	-7.56593	0.00914206	0.500117	TRUE
LNC_002315	0.0992254	0	5.29242	0.00963015	0.521271	TRUE
LNC_000622	0.0145693	0.432803	-4.85743	0.00975782	0.525597	TRUE
LNC_005985	0.495356	0	7.48951	0.00985818	0.526572	TRUE
LNC_001056	0	0.235794	-6.37913	0.00994345	0.529715	TRUE
LNC_001440	2.29452	0.221075	3.25341	0.0100858	0.533248	TRUE
LNC_004899	0.202056	0.0145693	3.69194	0.0103094	0.541438	TRUE
LNC_000407	0.100991	0	5.35217	0.0106294	0.554093	TRUE
LNC_000109	0	0.097311	-5.35904	0.0109208	0.564108	TRUE
LNC_004802	0.413708	0	7.40025	0.0109573	0.564108	TRUE
LNC_006425	0.113795	0	5.52778	0.0112035	0.56989	TRUE
LNC_003801	0.0418681	0.537075	-3.50853	0.0112695	0.57193	TRUE
LNC_005467	0	0.103676	-5.48511	0.011462	0.580035	TRUE
LNC_002952	0.089181	0	5.16787	0.0115602	0.58054	TRUE
ENSMUST00000151438.1	0.0964657	0	5.29796	0.011829	0.590746	TRUE
LNC_001066	0.750319	0.00636474	6.22772	0.0121002	0.600963	TRUE
LNC_003323	0.347823	0.0218539	3.98242	0.0125434	0.613792	TRUE
LNC_001065	0.194846	1.81035	-3.39465	0.0126378	0.617452	TRUE
LNC_002387	1.52366	5.20343	-1.74925	0.0128455	0.624696	TRUE
LNC_004275	0	0.0918661	-5.28083	0.012935	0.627116	TRUE
ENSMUST00000167642.7	4.02719	0.489538	3.00827	0.0131399	0.636071	TRUE
LNC_006088	2.79027	0.591673	2.34434	0.013251	0.638994	TRUE
LNC_005751	0	0.451648	-7.23687	0.0133055	0.640645	TRUE
LNC_003772	0.743904	0.0509925	4.04789	0.0133254	0.641112	TRUE
LNC_004790	0.386086	0	7.29673	0.013664	0.649725	TRUE
LNC_001498	0.0801311	1.30316	-4.1147	0.0137464	0.650451	TRUE
LNC_004019	0.502417	0.0609623	3.06013	0.0140609	0.658851	TRUE
LNC_004471	0.234874	1.29455	-2.46014	0.0140449	0.658851	TRUE
LNC_000288	0.0818964	1.26358	-4.00507	0.014436	0.673983	TRUE
LNC_002144	0	0.330967	-7.23618	0.0145733	0.678309	TRUE
LNC_005271	0	0.169312	-5.95214	0.0147685	0.681935	TRUE
LNC_006615	0.234799	0.0218539	3.42315	0.0147651	0.681935	TRUE
LNC_001612	0.386086	0	7.1325	0.0148124	0.683461	TRUE
LNC_000789	0.0282187	0.357346	-3.72414	0.0151394	0.693894	TRUE
LNC_003182	0	0.11188	-5.49379	0.0151416	0.693894	TRUE
LNC_005474	0	0.0909462	-5.24774	0.015119	0.693894	TRUE
LNC_005909	0	0.148304	-5.83133	0.015272	0.696686	TRUE
LNC_001113	0.641049	0.00728465	6.04353	0.0154068	0.701648	TRUE
LNC_005613	0	0.330967	-7.09944	0.0156604	0.709074	TRUE
LNC_001727	0.0910208	0	5.21019	0.0157642	0.712219	TRUE
LNC_001554	0.163867	0	6.06869	0.0161166	0.721472	TRUE
LNC_003096	0	0.305508	-7.12127	0.0163836	0.726031	TRUE
LNC_004215	0.0127295	0.177368	-3.50986	0.016718	0.734583	TRUE
LNC_004258	0	0.0818964	-5.01367	0.0170707	0.74364	TRUE
LNC_003407	0.0818964	0	5.06786	0.0174085	0.752085	TRUE
LNC_002255	0.342379	0	6.96063	0.0177044	0.761737	TRUE
ENSMUST00000209493.1	0	0.371517	-6.95773	0.0178239	0.764269	TRUE
LNC_006576	0	0.135574	-5.69264	0.0183058	0.779106	TRUE
LNC_005576	0.299143	0	6.9363	0.0183387	0.779682	TRUE
ENSMUST00000190991.1	0.0773714	0	4.95366	0.0187188	0.788703	TRUE
LNC_004916	0.0755316	0	4.93976	0.0190658	0.798665	TRUE
LNC_001946	0.142013	0.738683	-2.44666	0.0193549	0.803574	TRUE
LNC_003119	0.0145693	0.187337	-3.66768	0.0193544	0.803574	TRUE
LNC_002373	0.654873	3.47378	-2.38378	0.0199582	0.818509	TRUE
LNC_003384	0	0.0909462	-5.30542	0.020164	0.824961	TRUE
LNC_004242	0.0764515	0	4.93031	0.0202861	0.828186	TRUE
LNC_001371	0.914186	0.0381885	4.24157	0.0204258	0.832206	TRUE
LNC_001453	3.12865	0.483099	2.72289	0.0204701	0.833002	TRUE
LNC_006358	0.445134	0.0527578	2.92159	0.0204844	0.833046	TRUE
LNC_004888	2.70875	0.590604	2.2217	0.0205327	0.834473	TRUE
ENSMUST00000220067.1	0.0145693	0.154668	-3.27193	0.0207865	0.842072	TRUE
LNC_000038	0.295836	0.0345834	3.03364	0.0209691	0.848382	TRUE
LNC_001975	0.0609623	0.748355	-3.76969	0.0214102	0.860156	TRUE
LNC_003852	0.74557	2.86232	-1.90678	0.0222797	0.881561	TRUE
LNC_000609	0	0.0727719	-4.89547	0.0225264	0.888031	TRUE
LNC_004421	0	0.114565	-5.6317	0.0225741	0.889357	TRUE
LNC_000474	0.0782913	0	4.94441	0.0228343	0.892785	TRUE
LNC_001570	0.085576	0	5.05238	0.0228437	0.892785	TRUE
LNC_000635	0.10927	0.609474	-2.5476	0.02287	0.893203	TRUE
LNC_003541	0.0127295	0.190172	-3.51929	0.0233521	0.906339	TRUE
LNC_002555	0	0.127295	-5.84678	0.0235358	0.909632	TRUE
LNC_006624	0.0782913	0	4.99052	0.0235604	0.910026	TRUE
LNC_002423	0.506942	0.0655618	3.07514	0.0237246	0.913572	TRUE
LNC_000161	6.98941	1.90554	1.8957	0.0238619	0.918297	TRUE
LNC_001096	0.181196	0	6.21204	0.0242554	0.927781	TRUE
LNC_004932	0.284101	0	6.69406	0.0243575	0.929431	TRUE
LNC_005876	0.131124	0	5.71562	0.0246604	0.935895	TRUE
LNC_000855	0.0700868	0	4.82431	0.0247159	0.936048	TRUE
LNC_005325	0.262247	0	6.74193	0.0247198	0.936048	TRUE
ENSMUST00000146227.7	0.116554	0	5.52552	0.0253416	0.952575	TRUE
LNC_003825	33.4883	15.6412	1.05798	0.0256452	0.960554	TRUE
LNC_003968	0.259413	0.0200141	3.44355	0.0257151	0.962409	TRUE
LNC_000885	0.254963	0	6.70158	0.0258374	0.96603	TRUE
LNC_000264	0	0.068247	-4.74692	0.0261532	0.973799	TRUE
LNC_005772	0	0.068247	-4.74692	0.0261497	0.973799	TRUE
LNC_000259	0.113795	0.00636474	3.6246	0.0264674	0.98186	TRUE
LNC_002461	0.174832	0	6.01069	0.0264605	0.98186	TRUE
ENSMUST00000225083.1	1.02234	0.0827417	3.43846	0.0266355	0.985577	TRUE
LNC_002685	0.269532	0	6.61894	0.0266387	0.985577	TRUE
LNC_001947	0	0.110115	-5.42321	0.026707	0.986456	TRUE
LNC_000817	0.025459	0.23741	-3.05724	0.0269671	0.991807	TRUE
ENSMUST00000131345.7	24.1685	51.5079	-1.06828	0.0382045	1	TRUE
ENSMUST00000184170.1	0	0.216401	-6.62687	0.0280331	1	TRUE
LNC_000026	0.11096	0	5.49951	0.0298263	1	TRUE
LNC_000111	0	0.121999	-5.41778	0.037804	1	TRUE
LNC_000233	0.0145693	0.155514	-3.33401	0.0417456	1	TRUE
LNC_000346	0.0673271	0	4.79551	0.0307675	1	TRUE
LNC_000406	0.21762	0.0127295	3.79276	0.0399033	1	TRUE
LNC_000554	0.0818964	0	5.02069	0.0428692	1	TRUE
LNC_000600	1.2137	0.143704	2.86696	0.0305324	1	TRUE
LNC_000745	0	0.0891064	-5.26211	0.040535	1	TRUE
LNC_000783	0.0818964	0	5.09138	0.0452748	1	TRUE
LNC_000798	0.382805	0.0145693	4.70159	0.0320223	1	TRUE
LNC_000829	0.0792112	0	4.98083	0.0298873	1	TRUE
LNC_000907	0.0973856	0	5.33183	0.0323004	1	TRUE
LNC_000996	21.0442	10.8005	0.999406	0.048371	1	TRUE
LNC_001004	0.0864959	0	5.14514	0.037026	1	TRUE
LNC_001008	0.325895	0.0437079	3.03891	0.0331462	1	TRUE
LNC_001229	0.00728465	0.0982309	-3.44603	0.0314328	1	TRUE
LNC_001241	0.211255	0	6.27191	0.0374647	1	TRUE
LNC_001332	0	0.0773714	-4.84476	0.041521	1	TRUE
LNC_001377	0.229355	0.0272988	2.97043	0.0283159	1	TRUE
LNC_001428	3.63208	23.5412	-2.78832	0.0324577	1	TRUE
LNC_001644	0	0.0763769	-5.06897	0.0453898	1	TRUE
LNC_001660	2.27129	11.6567	-2.60527	0.0310606	1	TRUE
LNC_001784	0.0937059	0	5.28477	0.0349723	1	TRUE
LNC_001907	0.092786	0	5.23055	0.0358419	1	TRUE
LNC_002187	0.0710067	0	4.85122	0.0338613	1	TRUE
LNC_002437	0.0818964	0	5.02069	0.0428593	1	TRUE
LNC_002451	0	0.153674	-5.99221	0.0295224	1	TRUE
LNC_002709	0.124684	0.0127295	2.99797	0.0409253	1	TRUE
LNC_002881	0.0992254	0	5.35578	0.0385974	1	TRUE
LNC_003017	0.253968	0.025459	3.10296	0.0293378	1	TRUE
LNC_003175	0.0964657	0	5.23697	0.0325401	1	TRUE
LNC_003254	0.0646419	0	4.70034	0.0455285	1	TRUE
LNC_003659	0.00636474	0.466218	-5.4154	0.0287279	1	TRUE
LNC_003731	0	0.203672	-6.4057	0.0341219	1	TRUE
LNC_003827	4.1974	15.9114	-1.80265	0.0294215	1	TRUE
LNC_004004	0	0.0882611	-5.08776	0.0436363	1	TRUE
LNC_004133	0	0.0727719	-4.8853	0.0301837	1	TRUE
LNC_004170	0	0.0837362	-4.99697	0.0466941	1	TRUE
LNC_004207	0.211255	0	6.27191	0.0374573	1	TRUE
LNC_004216	0.0719266	0	4.85388	0.0383374	1	TRUE
LNC_004268	0.560918	0.0482328	3.51145	0.0317991	1	TRUE
LNC_004411	0	0.097311	-5.31921	0.0430565	1	TRUE
LNC_004449	0.00636474	0.100991	-3.46269	0.0297168	1	TRUE
LNC_004474	0	0.178213	-6.34911	0.0386505	1	TRUE
LNC_005156	0.87197	0.0391084	4.40288	0.030404	1	TRUE
LNC_005168	0.0764515	0	4.99092	0.0479991	1	TRUE
LNC_005364	0	0.071852	-4.95152	0.0295514	1	TRUE
LNC_005539	0.986138	0.24017	2.06216	0.0483286	1	TRUE
LNC_005796	0.063722	0	4.69755	0.040349	1	TRUE
LNC_005811	0.0437079	0.560098	-3.69502	0.0490722	1	TRUE
LNC_005858	0.218465	0.0355033	2.64291	0.0405203	1	TRUE
LNC_005988	0.0555175	0	4.5105	0.0458866	1	TRUE
LNC_006021	0	0.0855014	-5.20302	0.0485123	1	TRUE
LNC_006244	0.0846561	0	5.13193	0.0470487	1	TRUE
LNC_006307	0.786543	5.04205	-2.67201	0.0324677	1	TRUE
LNC_006441	0.590057	0.0381885	3.81631	0.0452715	1	TRUE
LNC_006639	0.00728465	0.330967	-5.16179	0.035794	1	TRUE
LNC_006708	0.0874158	0	5.1013	0.0453334	1	TRUE
LNC_006812	0.218539	0	6.32013	0.0356644	1	TRUE
