# Supplementary material for: Identifying lncRNA–miRNA–mRNA networks to investigate Alzheimer’s disease pathogenesis and therapy strategy
Source: Aging (Albany NY). 2020 Feb 7;12(3):2897–920. doi: 10.18632/aging.102785 (PMC7041741; doi:10.18632/aging.102785)
Supplement: Supplementary Table 4 [file aging-12-102785-s001..xlsx]

## Sheet: Supplemental_Table_S4
Supplementary Table S4. Differentially expressed miRNAs between the APP/PS1 and WT at 9 months.
sRNA	AD_9m_readcount	WT_9m_readcount	log2FoldChange	pval	padj
mmu-miR-376a-3p	22.3795	123.412	-1.4562	7.5198e-05	NA
mmu-miR-467a-5p	3251.72	2757.93	0.23596	7.8976e-05	0.0083714
mmu-miR-467b-5p	3251.72	2757.93	0.23596	7.8976e-05	0.0083714
mmu-miR-211-5p	12.1404	1.8368	1.383	0.00021693	NA
mmu-miR-448-3p	112.094	200.385	-0.76572	0.00027739	NA
mmu-miR-379-5p	34273.4	29672.5	0.20677	0.00036018	0.025453
mmu-miR-29b-3p	1982.3	5710.31	-1.1311	0.00058445	0.030976
mmu-miR-34b-5p	11.5893	29.7429	-1.0074	0.0018202	NA
mmu-miR-12194-3p	65.8962	42.4677	0.59315	0.0018402	NA
mmu-miR-411-3p	1310.97	1163.43	0.17155	0.002331	0.081034
mmu-miR-34c-5p	4872.06	7019.84	-0.49999	0.0025816	0.081034
mmu-miR-666-5p	1441.13	1165.4	0.30088	0.0026757	0.081034
mmu-miR-187-3p	1654.5	1347.89	0.28943	0.0033957	0.089986
mmu-miR-1912-3p	4.29931	15.6882	-1.0655	0.0039967	NA
mmu-miR-149-5p	2806.18	2240.29	0.31743	0.0044679	0.10524
mmu-miR-340-5p	6290.19	7643.08	-0.27564	0.0075267	0.14557
mmu-miR-16-5p	2831.72	3197.6	-0.17377	0.007553	0.14557
mmu-miR-99b-3p	905.068	785.05	0.20192	0.010249	0.18107
mmu-miR-134-3p	38.7099	23.9526	0.61777	0.010399	NA
mmu-miR-10b-5p	161.193	217.747	-0.41455	0.010835	NA
mmu-miR-1198-5p	1428.34	1258.25	0.18056	0.013042	0.21269
mmu-miR-491-5p	40.6403	62.1137	-0.53997	0.013759	NA
mmu-miR-29c-3p	445.344	606.835	-0.42088	0.014828	NA
mmu-miR-99a-3p	13.2464	25.5668	-0.74707	0.01562	NA
mmu-miR-204-5p	2717.71	3677.1	-0.41233	0.015912	0.23258
mmu-miR-126a-3p	158316	138639	0.18935	0.016456	0.23258
novel_447	5.81828	1.40551	0.88129	0.018779	NA
mmu-miR-1298-5p	21831.6	33593.5	-0.55252	0.019503	0.25841
mmu-miR-30e-5p	14510.4	16833	-0.21083	0.023998	0.29679
mmu-miR-210-3p	130.736	104.37	0.31211	0.027215	NA
mmu-miR-136-3p	4858.51	5875.43	-0.26695	0.027325	0.29679
mmu-miR-330-5p	28124.8	23147.6	0.27306	0.02832	0.29679
mmu-miR-30f	3528.16	3078.45	0.1945	0.029363	0.29679
mmu-miR-3071-5p	4618.32	5569.78	-0.26313	0.029516	0.29679
mmu-miR-3065-5p	1719.6	1976.33	-0.19825	0.032199	0.29679
mmu-miR-338-3p	1719.6	1976.33	-0.19825	0.032199	0.29679
mmu-miR-301a-3p	5.36646	12.0416	-0.76431	0.033137	NA
mmu-miR-434-5p	116640	104812	0.15281	0.034151	0.30167
mmu-miR-101a-5p	1.63399	5.55465	-0.79036	0.034714	NA
mmu-miR-6989-3p	8.79203	2.56883	0.78795	0.035636	NA
mmu-miR-128-3p	239048	315089	-0.37426	0.037166	0.31517
mmu-miR-7004-5p	2.9827	0.359273	0.70893	0.037881	NA
mmu-miR-133a-3p	79.1374	101.35	-0.3476	0.040194	NA
mmu-miR-3470a	9.94633	4.30434	0.74681	0.040531	NA
mmu-miR-679-5p	91.1917	71.6877	0.33736	0.040651	NA
mmu-miR-30b-5p	3401.24	3811.99	-0.1626	0.042401	0.34063
mmu-miR-3081-3p	352.985	293.62	0.26119	0.043189	NA
mmu-miR-369-5p	3231.92	2961.87	0.12482	0.043803	0.34063
mmu-miR-1970c-5p	1.45799	5.55234	-0.74363	0.044673	NA
mmu-miR-499-5p	153.913	187.145	-0.26573	0.044918	NA
mmu-miR-369-3p	1456.44	1673.57	-0.19734	0.046537	0.34063
mmu-miR-491-3p	0.945194	3.8461	-0.72454	0.047192	NA
mmu-miR-3074-5p	23940	21227.7	0.17121	0.047884	0.34063
mmu-miR-363-3p	4.49373	1.06203	0.72335	0.048167	NA
mmu-miR-24-3p	23968.5	21261	0.17068	0.048203	0.34063
mmu-miR-466b-5p	3.89006	9.02799	-0.72774	0.049862	NA
