# Supplementary material for: Identifying lncRNA–miRNA–mRNA networks to investigate Alzheimer’s disease pathogenesis and therapy strategy
Source: Aging (Albany NY). 2020 Feb 7;12(3):2897–920. doi: 10.18632/aging.102785 (PMC7041741; doi:10.18632/aging.102785)
Supplement: Supplementary Table 5 [file aging-12-102785-s015..xlsx]

## Sheet: Supplemental_Table_S5
Supplementary Table S5. Differentially expressed mRNAs between the APP/PS1 and WT at 6 months.
transcript_id	gene_id	gene_name	feature_id	AD_6m_FPKM	WT_6m_FPKM	log2.foldchange.	pvalue	qvalue
ENSMUST00000000001	ENSMUSG00000000001	Gnai3	transcript	10.6832	10.3608	0.0442113	0.94238	1
ENSMUST00000000003	ENSMUSG00000000003	Pbsn	transcript	0	0	NA	1	1
ENSMUST00000000010	ENSMUSG00000020875	Hoxb9	transcript	0	0	NA	1	1
ENSMUST00000000028	ENSMUSG00000000028	Cdc45	transcript	0.502666	0.354586	0.503462	0.568575	1
ENSMUST00000000033	ENSMUSG00000048583	Igf2	transcript	2.57823	2.07294	0.314701	0.62258	1
ENSMUST00000000049	ENSMUSG00000000049	Apoh	transcript	0.163928	0.145715	0.169916	0.891969	1
ENSMUST00000000058	ENSMUSG00000000058	Cav2	transcript	12.2603	12.8241	-0.0648617	0.864021	1
ENSMUST00000000080	ENSMUSG00000000078	Klf6	transcript	13.2033	14.3577	-0.120928	0.752323	1
ENSMUST00000000087	ENSMUSG00000000085	Scmh1	transcript	8.38597	8.87553	-0.0818549	0.840559	1
ENSMUST00000000090	ENSMUSG00000000088	Cox5a	transcript	113.661	113.151	0.00648179	0.991185	1
ENSMUST00000000094	ENSMUSG00000061689	Dlgap4	transcript	4.45763	2.95904	0.591148	0.387451	1
ENSMUST00000000095	ENSMUSG00000000093	Tbx2	transcript	0.515705	0.412965	0.320527	0.676994	1
ENSMUST00000000096	ENSMUSG00000000094	Tbx4	transcript	0	0	NA	1	1
ENSMUST00000000109	ENSMUSG00000055022	Cntn1	transcript	2.8963	8.85128	-1.61168	0.29576	1
ENSMUST00000000122	ENSMUSG00000000120	Ngfr	transcript	1.5514	1.45116	0.0963672	0.892865	1
ENSMUST00000000127	ENSMUSG00000000125	Wnt3	transcript	1.13124	1.2589	-0.154247	0.803612	1
ENSMUST00000000128	ENSMUSG00000000126	Wnt9a	transcript	0.584334	0.108097	2.43447	0.0273537	0.959053
ENSMUST00000000129	ENSMUSG00000000127	Fer	transcript	8.64139	8.56584	0.0126693	0.998942	1
ENSMUST00000000137	ENSMUSG00000020152	Actr2	transcript	118.616	111.322	0.0915598	0.830669	1
ENSMUST00000000145	ENSMUSG00000020333	Acsl6	transcript	0	0	NA	1	1
ENSMUST00000000153	ENSMUSG00000000149	Gna12	transcript	25.7766	25.5746	0.0113547	0.997946	1
ENSMUST00000000161	ENSMUSG00000000157	Itgb2l	transcript	0	0	NA	1	1
ENSMUST00000000163	ENSMUSG00000000159	Igsf5	transcript	0.0509033	0.118157	-1.21487	0.30493	1
ENSMUST00000000171	ENSMUSG00000000167	Pih1d2	transcript	0.746177	0.722788	0.0459466	0.981102	1
ENSMUST00000000175	ENSMUSG00000000171	Sdhd	transcript	30.8121	32.5746	-0.0802516	0.837669	1
ENSMUST00000000186	ENSMUSG00000000182	Fgf23	transcript	0.101526	0.099014	0.0361495	1	1
ENSMUST00000000187	ENSMUSG00000000183	Fgf6	transcript	0	0	NA	1	1
ENSMUST00000000188	ENSMUSG00000000184	Ccnd2	transcript	15.4379	15.6665	-0.0212046	0.933386	1
ENSMUST00000000193	ENSMUSG00000035385	Ccl2	transcript	0.0598753	0.053432	0.164258	1	1
ENSMUST00000000194	ENSMUSG00000035352	Ccl12	transcript	0.27602	0.151846	0.862161	0.555569	1
ENSMUST00000000199	ENSMUSG00000062661	Ncs1	transcript	80.705	81.4287	-0.0128795	0.949796	1
ENSMUST00000000201	ENSMUSG00000000197	Nalcn	transcript	24.5314	24.542	-0.000627624	0.974461	1
ENSMUST00000000206	ENSMUSG00000000202	Btbd17	transcript	7.99398	7.13346	0.164313	0.767597	1
ENSMUST00000000208	ENSMUSG00000000204	Slfn4	transcript	0	0.00861967	#NAME?	0.145193	1
ENSMUST00000000219	ENSMUSG00000000214	Th	transcript	4.93975	3.41459	0.532726	0.502082	1
ENSMUST00000000220	ENSMUSG00000000215	Ins2	transcript	0	0	NA	1	1
ENSMUST00000000221	ENSMUSG00000000216	Scnn1g	transcript	0.0760387	0.095058	-0.322075	0.714128	1
ENSMUST00000000253	ENSMUSG00000000247	Lhx2	transcript	13.6898	14.1032	-0.0429149	0.903921	1
ENSMUST00000000254	ENSMUSG00000000248	Clec2g	transcript	0.00440167	0.022214	-2.33535	0.43387	1
ENSMUST00000000260	ENSMUSG00000000253	Gmpr	transcript	15.2112	16.7739	-0.14108	0.743834	1
ENSMUST00000000266	ENSMUSG00000026535	Ifi202b	transcript	0	0.00783333	#NAME?	0.467134	1
ENSMUST00000000275	ENSMUSG00000038257	Glra3	transcript	4.96134	5.46472	-0.139418	0.791713	1
ENSMUST00000000284	ENSMUSG00000000275	Trim25	transcript	0.00251433	0.002939	-0.225149	1	1
ENSMUST00000000285	ENSMUSG00000000276	Dgke	transcript	15.5194	16.6376	-0.100373	0.782167	1
ENSMUST00000000287	ENSMUSG00000000278	Scpep1	transcript	5.32093	4.63982	0.197609	0.731666	1
ENSMUST00000000291	ENSMUSG00000000282	Mnt	transcript	10.5531	10.3431	0.0289976	0.969114	1
ENSMUST00000000299	ENSMUSG00000000290	Itgb2	transcript	1.87416	1.54381	0.279752	0.669751	1
ENSMUST00000000304	ENSMUSG00000000295	Hddc2	transcript	6.76746	6.96206	-0.0408997	0.933928	1
ENSMUST00000000305	ENSMUSG00000000296	Tpd52l1	transcript	7.86465	8.06185	-0.0357278	0.931609	1
ENSMUST00000000310	ENSMUSG00000000301	Pemt	transcript	0.562099	0.46094	0.286247	0.873616	1
ENSMUST00000000312	ENSMUSG00000000303	Cdh1	transcript	0.789986	0.738448	0.0973301	0.895994	1
ENSMUST00000000314	ENSMUSG00000000305	Cdh4	transcript	6.74621	5.90838	0.191314	0.68321	1
ENSMUST00000000317	ENSMUSG00000000308	Ckmt1	transcript	76.753	90.0127	-0.229907	0.540126	1
ENSMUST00000000326	ENSMUSG00000000317	Bcl6b	transcript	0.359254	0.287403	0.321929	0.713816	1
ENSMUST00000000327	ENSMUSG00000000318	Clec10a	transcript	0.0559187	0.037005	0.59561	0.857929	1
ENSMUST00000000329	ENSMUSG00000000320	Alox12	transcript	0.166146	0.106545	0.640986	0.484113	1
ENSMUST00000000335	ENSMUSG00000000326	Comt	transcript	5.35401	3.69007	0.536973	0.405337	1
ENSMUST00000000342	ENSMUSG00000020676	Ccl11	transcript	0.0267823	0.00965867	1.47139	0.652502	1
ENSMUST00000000348	ENSMUSG00000000339	Rtca	transcript	16.2724	16.688	-0.0363875	0.916349	1
ENSMUST00000000349	ENSMUSG00000000340	Dbt	transcript	5.61459	5.04853	0.153315	0.770042	1
ENSMUST00000000356	ENSMUSG00000000346	Dazap2	transcript	44.6109	42.9787	0.0537719	0.917317	1
ENSMUST00000000365	ENSMUSG00000000355	Mcts1	transcript	22.6971	19.191	0.242082	0.644023	1
ENSMUST00000000369	ENSMUSG00000000359	Rem1	transcript	0.131517	0.178166	-0.437976	0.640905	1
ENSMUST00000000384	ENSMUSG00000000374	Trappc10	transcript	27.4275	28.0764	-0.0337332	0.906899	1
ENSMUST00000000388	ENSMUSG00000000378	Ccm2	transcript	10.5355	11.535	-0.130756	0.768165	1
ENSMUST00000000394	ENSMUSG00000000384	Tbrg4	transcript	6.55286	5.46273	0.262501	0.621488	1
ENSMUST00000000395	ENSMUSG00000000385	Tmprss2	transcript	0.0192203	0.00453233	2.08431	0.348984	1
ENSMUST00000000402	ENSMUSG00000000392	Fap	transcript	0	0	NA	1	1
ENSMUST00000000412	ENSMUSG00000000402	Egfl6	transcript	0.656227	0.762744	-0.217004	0.76043	1
ENSMUST00000000421	ENSMUSG00000000411	Tssk3	transcript	0.016939	0.0262437	-0.631621	0.854376	1
ENSMUST00000000430	ENSMUSG00000000420	Galnt1	transcript	0.202392	0.243413	-0.266254	0.761905	1
ENSMUST00000000445	ENSMUSG00000000435	Myf5	transcript	0	0.00453867	#NAME?	0.627136	1
ENSMUST00000000449	ENSMUSG00000000439	Mkrn2	transcript	12.5858	12.9	-0.0355767	0.91744	1
ENSMUST00000000450	ENSMUSG00000000440	Pparg	transcript	0.014909	0.0108117	0.463595	1	1
ENSMUST00000000451	ENSMUSG00000000441	Raf1	transcript	15.5545	16.058	-0.0459621	0.895003	1
ENSMUST00000000466	ENSMUSG00000028494	Plin2	transcript	2.35688	1.96312	0.263731	0.694522	1
ENSMUST00000000476	ENSMUSG00000029231	Pdgfra	transcript	9.77254	9.11048	0.101207	0.830549	1
ENSMUST00000000500	ENSMUSG00000000489	Pdgfb	transcript	9.14004	9.45191	-0.0484058	0.898613	1
ENSMUST00000000505	ENSMUSG00000029730	Mcm7	transcript	2.75627	2.66717	0.0474071	0.950586	1
ENSMUST00000000514	ENSMUSG00000026315	Serpinb8	transcript	1.56362	0.666883	1.22938	0.295131	1
ENSMUST00000000542	ENSMUSG00000000530	Acvrl1	transcript	0.676937	1.6362	-1.27326	0.092151	1
ENSMUST00000000543	ENSMUSG00000000531	Grasp	transcript	19.0548	21.7169	-0.188669	0.654733	1
ENSMUST00000000544	ENSMUSG00000000532	Acvr1b	transcript	30.9898	33.2323	-0.100792	0.772975	1
ENSMUST00000000572	ENSMUSG00000000560	Gabra2	transcript	33.1299	21.4037	0.630274	0.170431	1
ENSMUST00000000573	ENSMUSG00000074340	Ovgp1	transcript	0.344814	0.297405	0.213389	0.81773	1
ENSMUST00000000574	ENSMUSG00000000562	Adora3	transcript	0.338115	0.392252	-0.214265	0.815399	1
ENSMUST00000000579	ENSMUSG00000000567	Sox9	transcript	9.34046	7.36467	0.342872	0.467855	1
ENSMUST00000000590	ENSMUSG00000032050	Rdx	transcript	18.8033	16.9499	0.149707	0.735683	1
ENSMUST00000000594	ENSMUSG00000000581	C1d	transcript	9.82721	8.70648	0.174694	0.72458	1
ENSMUST00000000608	ENSMUSG00000000594	Gm2a	transcript	12.3563	12.1187	0.0280096	0.970547	1
ENSMUST00000000619	ENSMUSG00000000605	Clcn4-2	transcript	40.7507	42.5197	-0.0613077	0.847582	1
ENSMUST00000000631	ENSMUSG00000000617	Grm6	transcript	0	0	NA	1	1
ENSMUST00000000632	ENSMUSG00000044807	Zfp354c	transcript	0.0122137	0.0197073	-0.690236	1	1
ENSMUST00000000641	ENSMUSG00000000627	Sema4f	transcript	10.0437	10.849	-0.111265	0.778695	1
ENSMUST00000000642	ENSMUSG00000000628	Hk2	transcript	1.21325	1.25498	-0.0487918	0.924216	1
ENSMUST00000000645	ENSMUSG00000000631	Myo18a	transcript	0.0764673	0.022823	1.74436	0.203381	1
ENSMUST00000000646	ENSMUSG00000000632	Sez6	transcript	14.9416	16.3709	-0.131803	0.732763	1
ENSMUST00000000674	ENSMUSG00000029534	St7	transcript	0	0	NA	1	1
ENSMUST00000000687	ENSMUSG00000000673	Haao	transcript	0.0215893	0.0345847	-0.679814	0.641035	1
ENSMUST00000000696	ENSMUSG00000000682	Cd52	transcript	2.23164	1.2645	0.819536	0.332998	1
ENSMUST00000000704	ENSMUSG00000000690	Hoxb6	transcript	0	0	NA	1	1
ENSMUST00000000707	ENSMUSG00000000693	Loxl3	transcript	0.706761	0.739795	-0.0659031	0.910213	1
ENSMUST00000000717	ENSMUSG00000000701	Tcl1b5	transcript	0	0	NA	1	1
ENSMUST00000000718	ENSMUSG00000079007	Tcl1b4	transcript	0	0	NA	1	1
ENSMUST00000000724	ENSMUSG00000000708	Kat2b	transcript	6.39071	6.2129	0.0407095	0.949812	1
ENSMUST00000000727	ENSMUSG00000000711	Rab5b	transcript	45.8517	46.6929	-0.0262268	0.923272	1
ENSMUST00000000746	ENSMUSG00000000730	Dnmt3l	transcript	0	0	NA	1	1
ENSMUST00000000755	ENSMUSG00000000739	Sult5a1	transcript	0.152582	0.102188	0.578356	0.644642	1
ENSMUST00000000756	ENSMUSG00000000740	Rpl13	transcript	215.276	216.666	-0.00928029	0.961804	1
ENSMUST00000000759	ENSMUSG00000000743	Chmp1a	transcript	28.8925	29.7807	-0.0436807	0.898404	1
ENSMUST00000000767	ENSMUSG00000000751	Rpa1	transcript	0.0404803	1.47701	-5.18931	0.00752451	0.423002
ENSMUST00000000769	ENSMUSG00000000753	Serpinf1	transcript	2.74953	3.04483	-0.147176	0.801467	1
ENSMUST00000000776	ENSMUSG00000000759	Tubgcp3	transcript	9.25244	9.73037	-0.0726594	0.851434	1
ENSMUST00000000783	ENSMUSG00000000766	Oprm1	transcript	0.022247	0.0206443	0.107865	1	1
ENSMUST00000000793	ENSMUSG00000000776	Polr3d	transcript	4.86244	5.17215	-0.0890828	0.856547	1
ENSMUST00000000804	ENSMUSG00000000787	Ddx3x	transcript	54.1224	48.6121	0.15491	0.705582	1
ENSMUST00000000808	ENSMUSG00000000791	Il12rb1	transcript	0.424112	0.607336	-0.51805	0.496281	1
ENSMUST00000000809	ENSMUSG00000000792	Slc5a5	transcript	2.16512	1.61436	0.423481	0.528102	1
ENSMUST00000000811	ENSMUSG00000000794	Kcnn3	transcript	5.07462	5.98649	-0.238409	0.613564	1
ENSMUST00000000828	ENSMUSG00000000811	Txnrd3	transcript	1.50665	1.44782	0.0574623	0.937772	1
ENSMUST00000000834	ENSMUSG00000000817	Fasl	transcript	0.059997	0.0367857	0.705747	0.549723	1
ENSMUST00000000844	ENSMUSG00000000827	Tpd52l2	transcript	0.585122	0.669725	-0.194833	0.867573	1
ENSMUST00000000881	ENSMUSG00000000861	Bcl11a	transcript	5.30156	5.51024	-0.0556994	0.892561	1
ENSMUST00000000889	ENSMUSG00000000869	Il4	transcript	0	0	NA	1	1
ENSMUST00000000894	ENSMUSG00000027490	E2f1	transcript	2.85726	2.77775	0.0407152	0.961082	1
ENSMUST00000000895	ENSMUSG00000027489	Necab3	transcript	17.2827	18.5389	-0.101222	0.806771	1
ENSMUST00000000896	ENSMUSG00000000876	Pxmp4	transcript	4.21516	4.15039	0.0223414	0.981033	1
ENSMUST00000000901	ENSMUSG00000000881	Dlg3	transcript	14.9251	15.2484	-0.0309113	0.919846	1
ENSMUST00000000910	ENSMUSG00000000889	Dbh	transcript	0.067299	0.0693453	-0.0432137	1	1
ENSMUST00000000924	ENSMUSG00000000901	Mmp11	transcript	0.36204	0.421678	-0.219993	0.791127	1
ENSMUST00000000925	ENSMUSG00000000902	Smarcb1	transcript	10.1572	8.76428	0.212793	0.68722	1
ENSMUST00000000926	ENSMUSG00000000903	Vpreb3	transcript	0	0	NA	1	1
ENSMUST00000000939	ENSMUSG00000000915	Hip1r	transcript	16.4665	17.5065	-0.0883594	0.806718	1
ENSMUST00000000940	ENSMUSG00000000916	Nsun5	transcript	2.57254	2.71515	-0.077835	0.883061	1
ENSMUST00000000958	ENSMUSG00000000934	Top1mt	transcript	5.41486	5.87657	-0.118052	0.809056	1
ENSMUST00000000964	ENSMUSG00000029844	Hoxa1	transcript	0.009632	0.0102807	-0.0940265	1	1
ENSMUST00000000984	ENSMUSG00000000958	Slc7a7	transcript	0.692496	0.579541	0.256895	0.76063	1
ENSMUST00000000985	ENSMUSG00000000959	Oxa1l	transcript	11.8195	11.791	0.00348003	0.986614	1
ENSMUST00000001002	ENSMUSG00000000976	Heatr6	transcript	3.2616	3.22647	0.0156234	0.993144	1
ENSMUST00000001008	ENSMUSG00000000982	Ccl3	transcript	0.299744	0.0713913	2.06991	0.117021	1
ENSMUST00000001009	ENSMUSG00000000983	Wfdc18	transcript	0.328231	0.496403	-0.596799	0.611496	1
ENSMUST00000001027	ENSMUSG00000063558	Aox1	transcript	1.37046	1.38481	-0.0150212	0.96897	1
ENSMUST00000001036	ENSMUSG00000032175	Tyk2	transcript	2.22197	2.43707	-0.133308	0.791141	1
ENSMUST00000001040	ENSMUSG00000001014	Icam4	transcript	0.346295	0.285355	0.279244	0.822268	1
ENSMUST00000001042	ENSMUSG00000001016	Ilf2	transcript	26.7311	25.2998	0.0793919	0.873853	1
ENSMUST00000001043	ENSMUSG00000001017	Chtop	transcript	1.17707	1.50195	-0.351641	0.594713	1
ENSMUST00000001046	ENSMUSG00000001020	S100a4	transcript	1.50877	1.37964	0.129085	0.895222	1
ENSMUST00000001047	ENSMUSG00000001021	S100a3	transcript	0.261332	0.20872	0.324314	0.807144	1
ENSMUST00000001049	ENSMUSG00000001023	S100a5	transcript	7.6117	1.89964	2.0025	0.164082	1
ENSMUST00000001051	ENSMUSG00000001025	S100a6	transcript	9.29783	8.57513	0.116737	0.863959	1
ENSMUST00000001055	ENSMUSG00000001029	Icam2	transcript	0.789872	0.627722	0.331494	0.718929	1
ENSMUST00000001059	ENSMUSG00000020715	Ern1	transcript	2.64107	2.43916	0.11474	0.830159	1
ENSMUST00000001063	ENSMUSG00000001036	Epn2	transcript	1.0185	1.13219	-0.152672	0.801867	1
ENSMUST00000001079	ENSMUSG00000001052	Sec24b	transcript	12.1103	11.8652	0.0294939	0.966811	1
ENSMUST00000001080	ENSMUSG00000001053	N4bp3	transcript	4.62265	5.15597	-0.157523	0.753102	1
ENSMUST00000001081	ENSMUSG00000001054	Rmnd5b	transcript	19.5183	19.7655	-0.0181577	0.948639	1
ENSMUST00000001092	ENSMUSG00000001065	Zfp276	transcript	4.23408	4.58448	-0.11471	0.793073	1
ENSMUST00000001108	ENSMUSG00000029106	Add1	transcript	0.002393	0.00502567	-1.07049	0.796925	1
ENSMUST00000001109	ENSMUSG00000001082	Mfsd10	transcript	0.601366	0.748676	-0.316099	0.712113	1
ENSMUST00000001112	ENSMUSG00000052783	Grk4	transcript	0.237085	0.280001	-0.24003	0.775069	1
ENSMUST00000001115	ENSMUSG00000074886	Grk6	transcript	13.41	13.1428	0.0290438	0.968445	1
ENSMUST00000001116	ENSMUSG00000001089	Luzp1	transcript	0.58844	0.542593	0.117025	0.904693	1
ENSMUST00000001122	ENSMUSG00000001095	Slc13a2	transcript	0.00650033	0.00318833	1.02771	1	1
ENSMUST00000001125	ENSMUSG00000001098	Kctd10	transcript	0.922901	0.86006	0.101739	0.914735	1
ENSMUST00000001126	ENSMUSG00000020829	Slc46a1	transcript	3.14992	3.37743	-0.100607	0.856063	1
ENSMUST00000001127	ENSMUSG00000001100	Poldip2	transcript	26.1374	27.1658	-0.0556755	0.873447	1
ENSMUST00000001130	ENSMUSG00000001103	Sebox	transcript	1.13239	0.703856	0.686017	0.394577	1
ENSMUST00000001147	ENSMUSG00000001119	Col6a1	transcript	4.04848	4.80819	-0.248111	0.600708	1
ENSMUST00000001148	ENSMUSG00000001120	Pcbp3	transcript	6.2835	9.17859	-0.546704	0.258074	1
ENSMUST00000001155	ENSMUSG00000001127	Araf	transcript	2.11832	2.20116	-0.055344	0.917034	1
ENSMUST00000001156	ENSMUSG00000001128	Cfp	transcript	1.51635	1.91149	-0.334096	0.6303	1
ENSMUST00000001166	ENSMUSG00000001138	Cnnm3	transcript	3.16217	3.23198	-0.0315017	0.930197	1
ENSMUST00000001172	ENSMUSG00000079610	Ankrd39	transcript	1.75642	0.968404	0.858961	0.219356	1
ENSMUST00000001179	ENSMUSG00000001151	Pcnt	transcript	6.31524	6.48795	-0.0389259	0.903371	1
ENSMUST00000001181	ENSMUSG00000020241	Col6a2	transcript	2.25801	1.76903	0.352088	0.555709	1
ENSMUST00000001183	ENSMUSG00000001155	Ftcd	transcript	0.0126733	0.0144813	-0.192398	1	1
ENSMUST00000001184	ENSMUSG00000001156	Mxd1	transcript	6.42556	7.23671	-0.171513	0.684897	1
ENSMUST00000001185	ENSMUSG00000001157	Gmcl1	transcript	9.07353	8.4586	0.101245	0.845847	1
ENSMUST00000001186	ENSMUSG00000001158	Snrnp27	transcript	18.7878	18.036	0.0589154	0.927872	1
ENSMUST00000001187	ENSMUSG00000029994	Anxa4	transcript	1.55227	1.00783	0.62313	0.602885	1
ENSMUST00000001202	ENSMUSG00000001173	Ocrl	transcript	8.74432	9.75006	-0.157066	0.703129	1
ENSMUST00000001204	ENSMUSG00000001175	Calm1	transcript	1.74976	0.168721	3.37445	0.000537565	0.0719891
ENSMUST00000001226	ENSMUSG00000022436	Sh3bp1	transcript	4.72914	5.33671	-0.174375	0.7175	1
ENSMUST00000001240	ENSMUSG00000001211	Agpat3	transcript	14.2538	13.496	0.0788172	0.868181	1
ENSMUST00000001242	ENSMUSG00000053329	D10Jhu81e	transcript	24.2613	25.9633	-0.0978149	0.807938	1
ENSMUST00000001247	ENSMUSG00000029130	Rnf32	transcript	1.45328	1.62351	-0.159802	0.816238	1
ENSMUST00000001253	ENSMUSG00000020651	Slc26a4	transcript	1.01756	0.876703	0.214958	0.77627	1
ENSMUST00000001254	ENSMUSG00000001225	Slc26a3	transcript	0.075185	0.030866	1.28443	0.245452	1
ENSMUST00000001256	ENSMUSG00000001227	Sema6b	transcript	32.9178	34.8637	-0.0828578	0.811989	1
ENSMUST00000001258	ENSMUSG00000001228	Uhrf1	transcript	0.301557	0.227614	0.405838	0.649699	1
ENSMUST00000001279	ENSMUSG00000001247	Lsr	transcript	0.752599	0.644856	0.222904	0.797248	1
ENSMUST00000001280	ENSMUSG00000001248	Gramd1a	transcript	20.0578	20.8718	-0.0573902	0.87122	1
ENSMUST00000001304	ENSMUSG00000001270	Ckb	transcript	631.263	687.002	-0.122073	0.72229	1
ENSMUST00000001319	ENSMUSG00000001300	Efnb2	transcript	15.0266	16.0368	-0.0938667	0.800296	1
ENSMUST00000001326	ENSMUSG00000001280	Sp1	transcript	6.46178	6.46583	-0.000905357	0.97562	1
ENSMUST00000001327	ENSMUSG00000001281	Itgb7	transcript	0.134663	0.167151	-0.311802	0.779522	1
ENSMUST00000001331	ENSMUSG00000001285	Myg1	transcript	0	0	NA	1	1
ENSMUST00000001339	ENSMUSG00000001305	Rrp15	transcript	3.47422	3.28754	0.0796813	0.914673	1
ENSMUST00000001347	ENSMUSG00000001313	Rnd2	transcript	53.1416	57.3401	-0.109702	0.770755	1
ENSMUST00000001384	ENSMUSG00000001349	Cnn1	transcript	0.230599	0.236658	-0.0374153	0.942537	1
ENSMUST00000001402	ENSMUSG00000001366	Fbxo9	transcript	0.002974	2.83678	-9.89763	0.000219148	0.0394756
ENSMUST00000001412	ENSMUSG00000001376	Ccdc132	transcript	4.6177	3.69978	0.319734	0.538237	1
ENSMUST00000001415	ENSMUSG00000006050	Sra1	transcript	9.97243	11.0483	-0.147812	0.736339	1
ENSMUST00000001416	ENSMUSG00000001380	Hars	transcript	27.0389	29.3653	-0.119072	0.755126	1
ENSMUST00000001419	ENSMUSG00000001383	Zmat2	transcript	34.8667	37.8708	-0.119234	0.744261	1
ENSMUST00000001439	ENSMUSG00000001403	Ube2c	transcript	0	0.044424	#NAME?	0.00796307	0.437137
ENSMUST00000001451	ENSMUSG00000001415	Smg5	transcript	18.1711	19.4498	-0.0981086	0.78957	1
ENSMUST00000001452	ENSMUSG00000001416	Cct3	transcript	30.1957	29.7644	0.0207575	0.98193	1
ENSMUST00000001454	ENSMUSG00000001418	Glmp	transcript	0	0	NA	1	1
ENSMUST00000001455	ENSMUSG00000001419	Mef2d	transcript	35.9567	36.6488	-0.0275065	0.918561	1
ENSMUST00000001456	ENSMUSG00000001420	Tmem79	transcript	0.116856	0.125331	-0.101004	0.949674	1
ENSMUST00000001460	ENSMUSG00000001424	Snd1	transcript	25.295	25.5821	-0.0162831	0.945393	1
ENSMUST00000001479	ENSMUSG00000001440	Kpnb1	transcript	41.6597	42.3278	-0.0229527	0.926426	1
ENSMUST00000001480	ENSMUSG00000001441	Npepps	transcript	41.389	39.9233	0.0520164	0.915376	1
ENSMUST00000001484	ENSMUSG00000001444	Tbx21	transcript	0.568906	0.455464	0.320854	0.789096	1
ENSMUST00000001485	ENSMUSG00000001445	Mrpl10	transcript	18.156	18.7132	-0.0436149	0.905036	1
ENSMUST00000001497	ENSMUSG00000022219	Cideb	transcript	2.03132	2.3054	-0.182596	0.781296	1
ENSMUST00000001507	ENSMUSG00000001467	Cyp51	transcript	13.3901	13.3663	0.0025638	0.982673	1
ENSMUST00000001513	ENSMUSG00000001473	Tubb6	transcript	0.885011	0.824998	0.101305	0.901171	1
ENSMUST00000001520	ENSMUSG00000031967	Afg3l1	transcript	6.22505	7.22327	-0.214565	0.620202	1
ENSMUST00000001522	ENSMUSG00000001482	Def8	transcript	0.0257873	0.008039	1.68157	0.513035	1
ENSMUST00000001534	ENSMUSG00000001494	Sost	transcript	0.072172	0.0397807	0.859372	0.613814	1
ENSMUST00000001536	ENSMUSG00000001496	Nkx2-1	transcript	0.189384	0.460875	-1.28306	0.226322	1
ENSMUST00000001538	ENSMUSG00000001497	Pax9	transcript	0	0	NA	1	1
ENSMUST00000001544	ENSMUSG00000023186	Vwa5a	transcript	4.64648	4.87307	-0.0686937	0.86682	1
ENSMUST00000001547	ENSMUSG00000001506	Col1a1	transcript	2.33873	2.31123	0.0170618	0.987566	1
ENSMUST00000001548	ENSMUSG00000001507	Itga3	transcript	3.33688	3.82558	-0.19718	0.680377	1
ENSMUST00000001559	ENSMUSG00000001518	Itfg2	transcript	7.97835	7.63515	0.063434	0.913593	1
ENSMUST00000001561	ENSMUSG00000001520	Nrip2	transcript	5.30978	5.3029	0.00187018	0.991715	1
ENSMUST00000001562	ENSMUSG00000001521	Tulp3	transcript	4.80207	4.55529	0.0761144	0.895606	1
ENSMUST00000001565	ENSMUSG00000001524	Gtf2h4	transcript	5.11138	5.16062	-0.0138323	0.967462	1
ENSMUST00000001566	ENSMUSG00000001525	Tubb5	transcript	143.784	139.175	0.0470074	0.923888	1
ENSMUST00000001569	ENSMUSG00000059714	Flot1	transcript	33.8649	36.5945	-0.111835	0.76781	1
ENSMUST00000001583	ENSMUSG00000001542	Ell2	transcript	8.80542	9.71793	-0.142257	0.730997	1
ENSMUST00000001592	ENSMUSG00000001552	Jup	transcript	16.2465	15.5958	0.0589746	0.909093	1
ENSMUST00000001595	ENSMUSG00000001555	Fkbp10	transcript	1.70751	1.81242	-0.0860245	0.886865	1
ENSMUST00000001599	ENSMUSG00000001558	Klhl10	transcript	0.089151	0.11548	-0.373324	0.771305	1
ENSMUST00000001608	ENSMUSG00000001566	Mnx1	transcript	0	0	NA	1	1
ENSMUST00000001611	ENSMUSG00000001569	Nom1	transcript	5.90237	6.32028	-0.098694	0.805787	1
ENSMUST00000001620	ENSMUSG00000027680	Fxr1	transcript	9.94214	9.74907	0.0282926	0.976637	1
ENSMUST00000001626	ENSMUSG00000001583	Tnk1	transcript	0.029621	0.002672	3.47063	0.206403	1
ENSMUST00000001631	ENSMUSG00000001588	Acap1	transcript	0.00305633	0.008421	-1.46219	0.841086	1
ENSMUST00000001652	ENSMUSG00000021070	Bdkrb2	transcript	0.465549	0.514918	-0.145408	0.856712	1
ENSMUST00000001667	ENSMUSG00000001622	Csn3	transcript	0	0	NA	1	1
ENSMUST00000001672	ENSMUSG00000001627	Ifrd1	transcript	8.04261	9.84626	-0.291911	0.505132	1
ENSMUST00000001675	ENSMUSG00000001630	Stk38l	transcript	7.5407	7.82678	-0.0537212	0.883195	1
ENSMUST00000001699	ENSMUSG00000022484	Hoxc10	transcript	0	0	NA	1	1
ENSMUST00000001700	ENSMUSG00000001655	Hoxc13	transcript	0	0	NA	1	1
ENSMUST00000001701	ENSMUSG00000001656	Hoxc11	transcript	0	0	NA	1	1
ENSMUST00000001703	ENSMUSG00000001657	Hoxc8	transcript	0	0	NA	1	1
ENSMUST00000001706	ENSMUSG00000036139	Hoxc9	transcript	0	0	NA	1	1
ENSMUST00000001709	ENSMUSG00000022485	Hoxc5	transcript	0	0	NA	1	1
ENSMUST00000001711	ENSMUSG00000001661	Hoxc6	transcript	0	0	NA	1	1
ENSMUST00000001712	ENSMUSG00000020196	Cabin1	transcript	14.159	15.0206	-0.0852191	0.807955	1
ENSMUST00000001713	ENSMUSG00000001663	Gstt1	transcript	3.07512	3.30095	-0.102236	0.868396	1
ENSMUST00000001715	ENSMUSG00000001665	Gstt3	transcript	1.51895	1.23406	0.299666	0.678069	1
ENSMUST00000001716	ENSMUSG00000001666	Ddt	transcript	16.9685	17.6814	-0.0593763	0.896025	1
ENSMUST00000001720	ENSMUSG00000001670	Tat	transcript	0.006606	0.016437	-1.3151	0.715922	1
ENSMUST00000001722	ENSMUSG00000001672	Marveld3	transcript	0.10683	0.098003	0.124419	1	1
ENSMUST00000001724	ENSMUSG00000001674	Ddx18	transcript	7.94248	7.93045	0.00218724	0.983608	1
ENSMUST00000001757	ENSMUSG00000001707	Eef1e1	transcript	15.8267	15.0711	0.0705843	0.905485	1
ENSMUST00000001780	ENSMUSG00000001729	Akt1	transcript	41.7461	44.2739	-0.0848169	0.81039	1
ENSMUST00000001790	ENSMUSG00000001739	Cldn15	transcript	0	0	NA	1	1
ENSMUST00000001792	ENSMUSG00000001741	Il16	transcript	1.57196	1.40807	0.158843	0.804741	1
ENSMUST00000001801	ENSMUSG00000001750	Tcirg1	transcript	2.26081	2.44915	-0.115442	0.843529	1
ENSMUST00000001802	ENSMUSG00000001751	Naglu	transcript	2.39036	2.3945	-0.00249673	0.985699	1
ENSMUST00000001806	ENSMUSG00000001755	Coasy	transcript	0.880499	1.24694	-0.502002	0.520984	1
ENSMUST00000001809	ENSMUSG00000022283	Pabpc1	transcript	55.3974	55.09	0.00802724	0.992985	1
ENSMUST00000001812	ENSMUSG00000001761	Smo	transcript	4.60133	4.85008	-0.0759561	0.857462	1
ENSMUST00000001818	ENSMUSG00000001767	Crnkl1	transcript	6.77803	6.83558	-0.0121977	0.960625	1
ENSMUST00000001824	ENSMUSG00000001773	Folh1	transcript	1.92195	2.34259	-0.285536	0.658804	1
ENSMUST00000001825	ENSMUSG00000001774	Chordc1	transcript	25.636	24.0734	0.0907323	0.856608	1
ENSMUST00000001826	ENSMUSG00000043943	Naalad2	transcript	0	0	NA	1	1
ENSMUST00000001834	ENSMUSG00000001783	Rtcb	transcript	40.7304	40.2628	0.0166585	0.991912	1
ENSMUST00000001836	ENSMUSG00000001785	Pwp1	transcript	6.22699	5.91422	0.074347	0.899402	1
ENSMUST00000001845	ENSMUSG00000001794	Capns1	transcript	43.6094	43.9104	-0.00992463	0.960312	1
ENSMUST00000001854	ENSMUSG00000030495	Slc7a10	transcript	7.87255	8.60028	-0.127553	0.775533	1
ENSMUST00000001867	ENSMUSG00000001815	Evx2	transcript	0	0	NA	1	1
ENSMUST00000001872	ENSMUSG00000001819	Hoxd13	transcript	0	0	NA	1	1
ENSMUST00000001878	ENSMUSG00000001823	Hoxd12	transcript	0	0	NA	1	1
ENSMUST00000001882	ENSMUSG00000001827	Folr1	transcript	0	0.0177547	#NAME?	0.184046	1
ENSMUST00000001884	ENSMUSG00000001829	Clpb	transcript	10.5992	10.9568	-0.0478699	0.889967	1
ENSMUST00000001900	ENSMUSG00000001844	Zdhhc4	transcript	0.988907	0.629519	0.651584	0.425072	1
ENSMUST00000001920	ENSMUSG00000001864	Aif1l	transcript	1.94833	2.08598	-0.0984877	0.856905	1
ENSMUST00000001921	ENSMUSG00000001865	Cpa3	transcript	0	0	NA	1	1
ENSMUST00000001927	ENSMUSG00000001870	Ltbp1	transcript	0.271031	0.250918	0.111246	0.907179	1
ENSMUST00000001950	ENSMUSG00000025139	Tollip	transcript	39.7194	40.9194	-0.0429411	0.888338	1
ENSMUST00000001963	ENSMUSG00000020681	Ace	transcript	3.97508	3.51011	0.179467	0.742039	1
ENSMUST00000001964	ENSMUSG00000020681	Ace	transcript	0.000819	0.0114687	-3.80769	0.447862	1
ENSMUST00000001965	ENSMUSG00000001901	Kcnh6	transcript	0.798353	0.665016	0.263639	0.721301	1
ENSMUST00000001974	ENSMUSG00000001909	Trmt1	transcript	3.26062	3.02536	0.108043	0.877082	1
ENSMUST00000001975	ENSMUSG00000001910	Nacc1	transcript	31.4596	31.1637	0.0136361	0.995192	1
ENSMUST00000001984	ENSMUSG00000007209	Ceacam9	transcript	0.074728	0.130944	-0.809229	0.523007	1
ENSMUST00000001989	ENSMUSG00000001924	Uba1	transcript	91.7914	90.9135	0.0138639	0.994248	1
ENSMUST00000001995	ENSMUSG00000001930	Vwf	transcript	2.10988	2.31037	-0.130963	0.766389	1
ENSMUST00000002007	ENSMUSG00000001942	Siae	transcript	5.43063	5.41763	0.00345842	0.990014	1
ENSMUST00000002008	ENSMUSG00000001943	Vsig2	transcript	0.980549	1.0382	-0.0824167	0.908958	1
ENSMUST00000002011	ENSMUSG00000001946	Esam	transcript	4.4106	5.52215	-0.324252	0.550652	1
ENSMUST00000002013	ENSMUSG00000001948	Spa17	transcript	0.734076	0.493922	0.571646	0.546562	1
ENSMUST00000002025	ENSMUSG00000025519	Tktl2	transcript	0	0.005171	#NAME?	0.628033	1
ENSMUST00000002029	ENSMUSG00000001964	Emd	transcript	10.9096	11.7423	-0.106119	0.804478	1
ENSMUST00000002043	ENSMUSG00000078622	Ccdc47	transcript	19.5416	19.2717	0.0200712	0.985393	1
ENSMUST00000002044	ENSMUSG00000020700	Map3k3	transcript	7.39987	7.99271	-0.111185	0.792707	1
ENSMUST00000002048	ENSMUSG00000001983	Taco1	transcript	7.24184	7.86258	-0.118646	0.812109	1
ENSMUST00000002053	ENSMUSG00000001988	Npas1	transcript	2.45121	3.15741	-0.365246	0.541512	1
ENSMUST00000002063	ENSMUSG00000001998	Ap4e1	transcript	2.68051	2.87327	-0.100188	0.828858	1
ENSMUST00000002064	ENSMUSG00000001999	Blvra	transcript	9.27096	8.49149	0.126701	0.835554	1
ENSMUST00000002073	ENSMUSG00000002020	Ltbp2	transcript	0.201253	0.0662563	1.60288	0.11158	1
ENSMUST00000002079	ENSMUSG00000031385	Plxnb3	transcript	3.59228	3.49531	0.0394791	0.959331	1
ENSMUST00000002080	ENSMUSG00000002006	Pdzd4	transcript	6.71368	7.57304	-0.173768	0.693006	1
ENSMUST00000002081	ENSMUSG00000002007	Srpk3	transcript	0.690254	0.691034	-0.00162935	0.993488	1
ENSMUST00000002084	ENSMUSG00000031378	Abcd1	transcript	2.2985	2.23607	0.0397311	0.96431	1
ENSMUST00000002087	ENSMUSG00000002012	Pnck	transcript	0.717271	1.45209	-1.01755	0.229176	1
ENSMUST00000002090	ENSMUSG00000002014	Ssr4	transcript	4.2992	4.23812	0.0206443	0.984597	1
ENSMUST00000002091	ENSMUSG00000002015	Bcap31	transcript	29.808	30.4273	-0.0296696	0.92863	1
ENSMUST00000002095	ENSMUSG00000002028	Kmt2a	transcript	18.5552	20.4637	-0.141249	0.681987	1
ENSMUST00000002099	ENSMUSG00000002031	Ift46	transcript	6.54067	6.15062	0.0887074	0.871702	1
ENSMUST00000002100	ENSMUSG00000002032	Tmem25	transcript	1.046	1.28066	-0.292015	0.687002	1
ENSMUST00000002101	ENSMUSG00000002033	Cd3g	transcript	0	0	NA	1	1
ENSMUST00000002112	ENSMUSG00000002043	Trappc6a	transcript	4.02069	5.35067	-0.412277	0.533484	1
ENSMUST00000002121	ENSMUSG00000002052	Supt6	transcript	35.1597	33.0773	0.0880797	0.840842	1
ENSMUST00000002127	ENSMUSG00000002058	Unc119	transcript	8.368	7.73806	0.112912	0.852115	1
ENSMUST00000002128	ENSMUSG00000002059	Rab34	transcript	0.830582	0.66778	0.31475	0.714433	1
ENSMUST00000002133	ENSMUSG00000002064	Sdf2	transcript	17.612	17.9542	-0.027765	0.933904	1
ENSMUST00000002145	ENSMUSG00000002076	Hsf2bp	transcript	0.066794	0.0320177	1.06085	0.522585	1
ENSMUST00000002152	ENSMUSG00000002083	Bbc3	transcript	2.25698	1.89523	0.252015	0.718512	1
ENSMUST00000002171	ENSMUSG00000002102	Psmc3	transcript	3.62308	0.0316733	6.83781	0.000318724	0.0506735
ENSMUST00000002172	ENSMUSG00000002103	Acp2	transcript	15.8104	14.7095	0.10413	0.822574	1
ENSMUST00000002176	ENSMUSG00000002107	Celf2	transcript	0.655232	0.718958	-0.133901	0.81699	1
ENSMUST00000002177	ENSMUSG00000002108	Nr1h3	transcript	0.464192	0.398812	0.219011	0.868605	1
ENSMUST00000002180	ENSMUSG00000002111	Spi1	transcript	1.0953	0.846398	0.371924	0.634246	1
ENSMUST00000002198	ENSMUSG00000002129	Sf3a1	transcript	15.9012	15.7764	0.0113748	1	1
ENSMUST00000002259	ENSMUSG00000002190	Clgn	transcript	1.8967	1.45577	0.381706	0.755185	1
ENSMUST00000002274	ENSMUSG00000002204	Napsa	transcript	0.0196503	0.0678833	-1.7885	0.40952	1
ENSMUST00000002275	ENSMUSG00000002205	Vrk3	transcript	7.17376	7.69236	-0.100698	0.821696	1
ENSMUST00000002280	ENSMUSG00000002210	Smg9	transcript	8.46592	8.30248	0.0281247	0.976191	1
ENSMUST00000002284	ENSMUSG00000046223	Plaur	transcript	0.37053	0.335528	0.143157	0.901926	1
ENSMUST00000002289	ENSMUSG00000022111	Uchl3	transcript	11.7737	11.1227	0.0820612	0.899779	1
ENSMUST00000002291	ENSMUSG00000002221	Paxip1	transcript	7.42894	7.54517	-0.0223968	0.940144	1
ENSMUST00000002292	ENSMUSG00000002222	Rmnd5a	transcript	24.7961	26.8829	-0.116577	0.737463	1
ENSMUST00000002297	ENSMUSG00000002227	Mov10	transcript	0.693083	0.369726	0.906574	0.457279	1
ENSMUST00000002298	ENSMUSG00000002228	Ppm1j	transcript	0.655916	0.485594	0.433762	0.651531	1
ENSMUST00000002303	ENSMUSG00000002233	Rhoc	transcript	4.66031	4.74547	-0.0261227	0.950461	1
ENSMUST00000002305	ENSMUSG00000042599	Kdm7a	transcript	15.9095	16.8637	-0.0840301	0.801118	1
ENSMUST00000002310	ENSMUSG00000002240	Prr27	transcript	0	0	NA	1	1
ENSMUST00000002318	ENSMUSG00000024220	Zfp523	transcript	0.0428363	0.179351	-2.06588	0.0873046	1
ENSMUST00000002320	ENSMUSG00000002250	Ppard	transcript	5.93387	6.45848	-0.122222	0.777219	1
ENSMUST00000002327	ENSMUSG00000002257	Def6	transcript	0.726511	0.667515	0.122186	0.894777	1
ENSMUST00000002336	ENSMUSG00000002266	Zim1	transcript	1.00714	1.37425	-0.448374	0.504373	1
ENSMUST00000002344	ENSMUSG00000002274	Metrn	transcript	0.0496147	0.138195	-1.47787	0.311537	1
ENSMUST00000002350	ENSMUSG00000002280	Narfl	transcript	7.27183	7.16891	0.0205641	0.984161	1
ENSMUST00000002360	ENSMUSG00000002289	Angptl4	transcript	0.942212	1.18737	-0.33365	0.616736	1
ENSMUST00000002368	ENSMUSG00000002297	Dbf4	transcript	0.229475	0.183475	0.322754	0.813354	1
ENSMUST00000002379	ENSMUSG00000002308	Cd320	transcript	4.78612	4.27114	0.164238	0.779524	1
ENSMUST00000002389	ENSMUSG00000022218	Tgm1	transcript	0.00303167	0	Inf	0.622286	1
ENSMUST00000002391	ENSMUSG00000002320	Tm9sf1	transcript	3.75996	4.28454	-0.188421	0.716919	1
ENSMUST00000002395	ENSMUSG00000002324	Rec8	transcript	0.0132733	0.0217653	-0.713501	0.771227	1
ENSMUST00000002397	ENSMUSG00000002326	Gmpr2	transcript	7.37372	7.64771	-0.0526346	0.90648	1
ENSMUST00000002398	ENSMUSG00000022220	Adcy4	transcript	0.337777	0.695514	-1.04201	0.359878	1
ENSMUST00000002400	ENSMUSG00000002329	Mdp1	transcript	11.8561	12.2315	-0.0449734	0.906761	1
ENSMUST00000002403	ENSMUSG00000002332	Dhrs1	transcript	22.1642	22.256	-0.00596359	0.970531	1
ENSMUST00000002412	ENSMUSG00000002341	Ncan	transcript	46.281	48.0275	-0.0534417	0.865028	1
ENSMUST00000002413	ENSMUSG00000002342	Tmem161a	transcript	5.74233	5.58727	0.0394933	0.951233	1
ENSMUST00000002418	ENSMUSG00000002345	2310045N01Rik	transcript	5.93257	5.27407	0.169741	0.81271	1
ENSMUST00000002436	ENSMUSG00000002365	Snx9	transcript	4.92758	5.30537	-0.106576	0.819577	1
ENSMUST00000002444	ENSMUSG00000024206	Rfx2	transcript	0.464002	0.611225	-0.397573	0.617909	1
ENSMUST00000002445	ENSMUSG00000002372	Ranbp3	transcript	21.3756	22.0268	-0.0432953	0.898309	1
ENSMUST00000002452	ENSMUSG00000002379	Ndufa11	transcript	13.5076	13.4482	0.00635877	0.988061	1
ENSMUST00000002456	ENSMUSG00000020622	Nt5c1b	transcript	0	0	NA	1	1
ENSMUST00000002457	ENSMUSG00000002384	Bmp8b	transcript	0.0126783	0.0171363	-0.434693	1	1
ENSMUST00000002466	ENSMUSG00000002393	Nr2f6	transcript	10.9515	11.9183	-0.12205	0.777488	1
ENSMUST00000002469	ENSMUSG00000002396	Ocel1	transcript	1.53742	1.6363	-0.0899263	0.887424	1
ENSMUST00000002473	ENSMUSG00000031820	Babam1	transcript	23.5672	24.622	-0.0631715	0.865653	1
ENSMUST00000002487	ENSMUSG00000002413	Braf	transcript	26.8333	25.9423	0.0487144	0.92409	1
ENSMUST00000002495	ENSMUSG00000041420	Meis3	transcript	5.86688	7.7479	-0.401212	0.43417	1
ENSMUST00000002502	ENSMUSG00000002428	Hltf	transcript	6.48553	6.04991	0.100311	0.84456	1
ENSMUST00000002518	ENSMUSG00000054452	Aes	transcript	196.569	206.322	-0.0698644	0.828994	1
ENSMUST00000002529	ENSMUSG00000002455	Prpf6	transcript	19.5838	20.3442	-0.0549594	0.873955	1
ENSMUST00000002532	ENSMUSG00000002458	Rgs19	transcript	0.372559	0.633983	-0.766975	0.352603	1
ENSMUST00000002533	ENSMUSG00000002459	Rgs20	transcript	10.0445	6.10566	0.718186	0.180782	1
ENSMUST00000002549	ENSMUSG00000002475	Abhd3	transcript	14.4555	17.6698	-0.289665	0.528792	1
ENSMUST00000002551	ENSMUSG00000002477	Snrpd1	transcript	24.2455	18.7732	0.369041	0.457654	1
ENSMUST00000002572	ENSMUSG00000002504	Slc9a3r2	transcript	10.8398	10.9892	-0.0197455	0.946757	1
ENSMUST00000002588	ENSMUSG00000002489	Tiam1	transcript	12.853	16.1812	-0.332213	0.399323	1
ENSMUST00000002599	ENSMUSG00000002524	Puf60	transcript	20.109	17.095	0.23427	0.62482	1
ENSMUST00000002603	ENSMUSG00000022568	Scrib	transcript	4.87969	4.25381	0.198036	0.70809	1
ENSMUST00000002625	ENSMUSG00000002550	Uck1	transcript	10.904	12.0358	-0.142486	0.747436	1
ENSMUST00000002640	ENSMUSG00000002565	Scin	transcript	0.0628413	0.0619057	0.0216423	1	1
ENSMUST00000002655	ENSMUSG00000002580	Mien1	transcript	27.7472	31.9332	-0.202714	0.648572	1
ENSMUST00000002663	ENSMUSG00000002588	Pon1	transcript	0.0872797	0	Inf	0.00322852	0.243296
ENSMUST00000002677	ENSMUSG00000002602	Axl	transcript	10.0736	10.6435	-0.0793923	0.834617	1
ENSMUST00000002678	ENSMUSG00000002603	Tgfb1	transcript	2.66752	2.34632	0.185097	0.782616	1
ENSMUST00000002683	ENSMUSG00000002608	Ccdc97	transcript	14.4437	13.8104	0.0646904	0.903047	1
ENSMUST00000002699	ENSMUSG00000024045	Akap8	transcript	10.697	10.8268	-0.0174036	0.946328	1
ENSMUST00000002708	ENSMUSG00000002633	Shh	transcript	1.06497	1.22673	-0.204007	0.762217	1
ENSMUST00000002710	ENSMUSG00000002635	Pdcd2l	transcript	7.50221	8.66249	-0.207466	0.689534	1
ENSMUST00000002733	ENSMUSG00000002658	Gtf2f1	transcript	19.2237	18.906	0.0240385	0.980457	1
ENSMUST00000002735	ENSMUSG00000002660	Clpp	transcript	18.1382	17.7189	0.0337488	0.961511	1
ENSMUST00000002737	ENSMUSG00000002661	Alkbh7	transcript	7.6186	7.86222	-0.0454106	0.924497	1
ENSMUST00000002740	ENSMUSG00000002664	Pspn	transcript	0.0289653	0.0220477	0.393701	1	1
ENSMUST00000002756	ENSMUSG00000002679	Med6	transcript	8.04497	8.42648	-0.0668441	0.89095	1
ENSMUST00000002757	ENSMUSG00000091803	Cox16	transcript	1.40665	1.56142	-0.150593	0.819126	1
ENSMUST00000002765	ENSMUSG00000002688	Prkd1	transcript	3.15661	3.53052	-0.161505	0.738474	1
ENSMUST00000002790	ENSMUSG00000002718	Cse1l	transcript	20.3301	19.4759	0.0619312	0.90401	1
ENSMUST00000002805	ENSMUSG00000002728	Naa20	transcript	2.34593	2.9587	-0.334804	0.621378	1
ENSMUST00000002808	ENSMUSG00000002731	Prkra	transcript	6.18169	6.65937	-0.107384	0.82763	1
ENSMUST00000002809	ENSMUSG00000002732	Fkbp7	transcript	1.57519	1.38191	0.188857	0.844264	1
ENSMUST00000002817	ENSMUSG00000057897	Camk2b	transcript	8.30681	7.77632	0.0952057	0.904055	1
ENSMUST00000002818	ENSMUSG00000002741	Ykt6	transcript	23.6996	23.9241	-0.0136066	0.95226	1
ENSMUST00000002825	ENSMUSG00000002748	Baz1b	transcript	23.3999	24.5418	-0.0687366	0.83206	1
ENSMUST00000002837	ENSMUSG00000063406	Tmed5	transcript	8.76143	7.95245	0.139768	0.777176	1
ENSMUST00000002839	ENSMUSG00000059409	Ppp2r5d	transcript	27.9611	29.4547	-0.0750766	0.829038	1
ENSMUST00000002840	ENSMUSG00000002763	Pex6	transcript	16.2665	17.1209	-0.0738521	0.844247	1
ENSMUST00000002844	ENSMUSG00000002767	Mrpl2	transcript	6.63629	8.56121	-0.367438	0.560327	1
ENSMUST00000002845	ENSMUSG00000002768	Mea1	transcript	27.8213	26.9	0.048583	0.937997	1
ENSMUST00000002846	ENSMUSG00000002769	Gnmt	transcript	0.161464	0.15048	0.101644	0.95926	1
ENSMUST00000002848	ENSMUSG00000002771	Grin2d	transcript	3.26939	3.93554	-0.267536	0.565308	1
ENSMUST00000002850	ENSMUSG00000030834	Abcc6	transcript	0.199064	0.19033	0.0647292	0.965317	1
ENSMUST00000002855	ENSMUSG00000002778	Kdelr1	transcript	9.87504	11.6335	-0.236427	0.63687	1
ENSMUST00000002880	ENSMUSG00000002803	Btbd6	transcript	18.7884	17.8845	0.0711376	0.894676	1
ENSMUST00000002881	ENSMUSG00000002804	Nudt14	transcript	3.32535	3.49417	-0.0714427	0.907982	1
ENSMUST00000002883	ENSMUSG00000021319	Sfrp4	transcript	0.570938	0.587819	-0.0420387	0.957278	1
ENSMUST00000002885	ENSMUSG00000002808	Epdr1	transcript	41.9234	40.6679	0.0438673	0.936509	1
ENSMUST00000002889	ENSMUSG00000002812	Flii	transcript	13.1468	13.6457	-0.053741	0.878279	1
ENSMUST00000002891	ENSMUSG00000002814	Top3a	transcript	1.24276	1.13608	0.129487	0.861095	1
ENSMUST00000002902	ENSMUSG00000002825	Qtrt1	transcript	3.65266	3.97376	-0.121557	0.83449	1
ENSMUST00000002908	ENSMUSG00000002831	Plin4	transcript	4.85049	6.6186	-0.448395	0.321646	1
ENSMUST00000002911	ENSMUSG00000002833	Hdgfrp2	transcript	19.3927	19.9439	-0.0404369	0.902957	1
ENSMUST00000002914	ENSMUSG00000002835	Chaf1a	transcript	1.17513	1.07214	0.13232	0.854349	1
ENSMUST00000002923	ENSMUSG00000002844	Adprh	transcript	36.9843	36.5743	0.016085	0.990731	1
ENSMUST00000002924	ENSMUSG00000002845	Tmem39a	transcript	1.60993	1.61921	-0.00829632	0.968373	1
ENSMUST00000002925	ENSMUSG00000002846	Timmdc1	transcript	11.2807	10.5181	0.100978	0.854433	1
ENSMUST00000002926	ENSMUSG00000002847	Pla1a	transcript	0.430488	0.43623	-0.019116	0.980589	1
ENSMUST00000002964	ENSMUSG00000002885	Cd97	transcript	0.266022	0.141537	0.910368	0.283976	1
ENSMUST00000002976	ENSMUSG00000002897	Il17ra	transcript	4.69339	4.85003	-0.0473628	0.905099	1
ENSMUST00000002979	ENSMUSG00000002900	Lamb1	transcript	4.25251	4.48643	-0.0772565	0.849785	1
ENSMUST00000002989	ENSMUSG00000002910	Arrdc2	transcript	3.03516	4.35259	-0.520103	0.352711	1
ENSMUST00000003017	ENSMUSG00000029925	Tbxas1	transcript	0.774119	0.666832	0.215232	0.802575	1
ENSMUST00000003027	ENSMUSG00000002948	Map2k7	transcript	2.22676	1.46894	0.600172	0.417168	1
ENSMUST00000003029	ENSMUSG00000002949	Timm44	transcript	11.2295	11.9531	-0.0900945	0.830347	1
ENSMUST00000003035	ENSMUSG00000030768	Disp1	transcript	0.883164	1.01118	-0.195286	0.77343	1
ENSMUST00000003038	ENSMUSG00000002957	Ap2a2	transcript	69.9392	69.4916	0.00926288	0.995908	1
ENSMUST00000003044	ENSMUSG00000002963	Pnkp	transcript	3.26415	2.55471	0.353546	0.611012	1
ENSMUST00000003049	ENSMUSG00000002968	Med25	transcript	20.3386	21.5483	-0.0833556	0.826062	1
ENSMUST00000003061	ENSMUSG00000002980	Bcam	transcript	5.50388	6.32637	-0.200927	0.675576	1
ENSMUST00000003066	ENSMUSG00000002985	Apoe	transcript	0	0	NA	1	1
ENSMUST00000003071	ENSMUSG00000074336	Apoc4	transcript	0.0347403	0.0225227	0.625234	1	1
ENSMUST00000003074	ENSMUSG00000002992	Apoc2	transcript	0	0	NA	1	1
ENSMUST00000003079	ENSMUSG00000002997	Prkar2b	transcript	2.46384	4.7063	-0.933686	0.193764	1
ENSMUST00000003100	ENSMUSG00000052974	Cyp2f2	transcript	0.237861	0.150763	0.657842	0.474787	1
ENSMUST00000003115	ENSMUSG00000003031	Cdkn1b	transcript	7.95739	9.45598	-0.248932	0.611552	1
ENSMUST00000003117	ENSMUSG00000003033	Ap1m1	transcript	18.7923	18.497	0.0228548	0.977869	1
ENSMUST00000003121	ENSMUSG00000003037	Rab8a	transcript	5.69013	5.65312	0.00941497	0.996541	1
ENSMUST00000003123	ENSMUSG00000003039	Fam32a	transcript	25.2521	27.0069	-0.0969249	0.801953	1
ENSMUST00000003135	ENSMUSG00000003051	Elf3	transcript	0.042057	0.0353157	0.252038	0.896213	1
ENSMUST00000003137	ENSMUSG00000003053	Cyp2c29	transcript	0	0	NA	1	1
ENSMUST00000003152	ENSMUSG00000003068	Stk11	transcript	21.9003	21.9741	-0.00485079	0.971431	1
ENSMUST00000003154	ENSMUSG00000003070	Efna2	transcript	2.15043	2.31193	-0.104474	0.85402	1
ENSMUST00000003156	ENSMUSG00000003072	Atp5d	transcript	1.16483	1.3389	-0.200939	0.821199	1
ENSMUST00000003183	ENSMUSG00000003099	Ppp5c	transcript	37.1309	39.3902	-0.0852161	0.812842	1
ENSMUST00000003191	ENSMUSG00000024070	Prkd3	transcript	1.36741	1.11539	0.293888	0.876168	1
ENSMUST00000003203	ENSMUSG00000003119	Cdk12	transcript	0.677529	0.583408	0.215778	0.782316	1
ENSMUST00000003207	ENSMUSG00000003123	Lipe	transcript	2.48802	2.06095	0.271691	0.69528	1
ENSMUST00000003219	ENSMUSG00000003135	Cnot11	transcript	8.85684	9.47136	-0.0967798	0.812	1
ENSMUST00000003238	ENSMUSG00000003154	Foxj2	transcript	8.68544	8.75294	-0.0111691	0.957558	1
ENSMUST00000003268	ENSMUSG00000003200	Sh3gl1	transcript	9.60107	11.194	-0.221462	0.621758	1
ENSMUST00000003274	ENSMUSG00000003206	Ebi3	transcript	0.37826	0.415234	-0.134548	0.89728	1
ENSMUST00000003284	ENSMUSG00000003184	Irf3	transcript	2.19724	2.13546	0.0411471	0.967477	1
ENSMUST00000003290	ENSMUSG00000003190	Bcl2l12	transcript	0.80796	0.70477	0.197132	0.832786	1
ENSMUST00000003310	ENSMUSG00000003226	Ranbp2	transcript	36.3143	36.676	-0.0142973	0.943446	1
ENSMUST00000003312	ENSMUSG00000003227	Edar	transcript	0.101739	0.0966853	0.0734991	1	1
ENSMUST00000003313	ENSMUSG00000003228	Grk5	transcript	6.49283	6.94146	-0.0963911	0.821645	1
ENSMUST00000003318	ENSMUSG00000003233	Dvl3	transcript	1.12774	1.24798	-0.146165	0.819798	1
ENSMUST00000003319	ENSMUSG00000003234	Abcf3	transcript	16.1091	16.1663	-0.0051117	0.969979	1
ENSMUST00000003320	ENSMUSG00000003235	Eif2b5	transcript	14.1546	14.0869	0.00691453	0.990548	1
ENSMUST00000003345	ENSMUSG00000021314	Amph	transcript	61.1865	61.8614	-0.0158265	0.943236	1
ENSMUST00000003351	ENSMUSG00000020734	Grin2c	transcript	0.0331137	2.50293	-6.24005	0.000233077	0.0408371
ENSMUST00000003360	ENSMUSG00000003273	Car11	transcript	48.7204	52.0074	-0.0941929	0.794201	1
ENSMUST00000003369	ENSMUSG00000003282	Plag1	transcript	1.30007	1.16001	0.164451	0.803612	1
ENSMUST00000003370	ENSMUSG00000003283	Hck	transcript	0.253358	0.123032	1.04214	0.313017	1
ENSMUST00000003386	ENSMUSG00000003299	Mrpl4	transcript	16.7494	17.8715	-0.0935482	0.82682	1
ENSMUST00000003395	ENSMUSG00000032177	Pde4a	transcript	5.53367	5.63296	-0.0256566	0.942501	1
ENSMUST00000003397	ENSMUSG00000003309	Ap1m2	transcript	0.0225167	0	Inf	0.204473	1
ENSMUST00000003404	ENSMUSG00000003316	Glg1	transcript	0	0.131621	#NAME?	0.0088831	0.470052
ENSMUST00000003413	ENSMUSG00000061126	Cyp4f39	transcript	0	0.006159	#NAME?	0.627118	1
ENSMUST00000003416	ENSMUSG00000048440	Cyp4f16	transcript	0.691363	0.781716	-0.177201	0.818069	1
ENSMUST00000003433	ENSMUSG00000020190	Mknk2	transcript	11.415	14.0087	-0.295394	0.48768	1
ENSMUST00000003434	ENSMUSG00000003344	Btbd2	transcript	7.18601	8.47978	-0.238836	0.611511	1
ENSMUST00000003436	ENSMUSG00000003346	Abhd17a	transcript	46.2865	51.1927	-0.145346	0.705235	1
ENSMUST00000003438	ENSMUSG00000003348	Mob3a	transcript	3.43679	3.66374	-0.0922541	0.851081	1
ENSMUST00000003442	ENSMUSG00000003352	Cacnb3	transcript	52.0795	54.6417	-0.069288	0.841725	1
ENSMUST00000003444	ENSMUSG00000003354	Ccdc65	transcript	2.53128	2.67781	-0.0811913	0.883003	1
ENSMUST00000003445	ENSMUSG00000003355	Fkbp11	transcript	0.59147	0.773553	-0.387195	0.669214	1
ENSMUST00000003450	ENSMUSG00000003360	Ddx23	transcript	20.9299	19.9247	0.071009	0.887357	1
ENSMUST00000003451	ENSMUSG00000054855	Rnd1	transcript	6.73268	7.10513	-0.077682	0.863735	1
ENSMUST00000003459	ENSMUSG00000020437	Myo1g	transcript	0.125391	0.124816	0.00663475	1	1
ENSMUST00000003461	ENSMUSG00000020456	Ogdh	transcript	24.6861	25.5736	-0.0509551	0.876277	1
ENSMUST00000003468	ENSMUSG00000003378	Grik5	transcript	49.606	60.7239	-0.291748	0.428456	1
ENSMUST00000003469	ENSMUSG00000003379	Cd79a	transcript	0.0301327	0.110462	-1.87415	0.191345	1
ENSMUST00000003493	ENSMUSG00000003402	Prkcsh	transcript	11.5307	12.9325	-0.16552	0.714545	1
ENSMUST00000003501	ENSMUSG00000003410	Elavl3	transcript	42.1524	43.4455	-0.0435917	0.884438	1
ENSMUST00000003502	ENSMUSG00000003411	Rab3b	transcript	4.91365	2.48347	0.984437	0.15698	1
ENSMUST00000003509	ENSMUSG00000003418	St8sia6	transcript	0.759797	0.786905	-0.0505748	0.919725	1
ENSMUST00000003512	ENSMUSG00000003420	Fcgrt	transcript	6.45622	6.01091	0.103107	0.868106	1
ENSMUST00000003513	ENSMUSG00000003421	Nosip	transcript	8.2845	8.79862	-0.0868639	0.837027	1
ENSMUST00000003521	ENSMUSG00000003429	Rps11	transcript	156.424	155.442	0.00907812	0.993931	1
ENSMUST00000003527	ENSMUSG00000003435	Supt5	transcript	34.9257	34.9073	0.000760879	0.978416	1
ENSMUST00000003529	ENSMUSG00000003437	Paf1	transcript	16.8813	15.4747	0.12551	0.798154	1
ENSMUST00000003536	ENSMUSG00000003444	Med29	transcript	5.61803	6.04574	-0.105855	0.842592	1
ENSMUST00000003544	ENSMUSG00000003452	Bicd1	transcript	0.785434	0.855688	-0.123595	0.854579	1
ENSMUST00000003550	ENSMUSG00000003458	Ncstn	transcript	18.2436	16.6839	0.128931	0.783124	1
ENSMUST00000003554	ENSMUSG00000007122	Casq1	transcript	0.146858	0.185046	-0.333468	0.770267	1
ENSMUST00000003561	ENSMUSG00000003469	Phyhip	transcript	144.639	154.922	-0.0990849	0.765265	1
ENSMUST00000003568	ENSMUSG00000003476	Crhr2	transcript	0.455255	0.247576	0.878803	0.457671	1
ENSMUST00000003569	ENSMUSG00000003477	Inmt	transcript	0.671222	0.24764	1.43854	0.12253	1
ENSMUST00000003572	ENSMUSG00000029777	Gars	transcript	44.5918	40.1435	0.151612	0.723739	1
ENSMUST00000003574	ENSMUSG00000003484	Cyp4f18	transcript	0.0158407	0.019526	-0.301763	1	1
ENSMUST00000003575	ENSMUSG00000031799	Tpm4	transcript	8.96064	8.43479	0.0872498	0.876448	1
ENSMUST00000003597	ENSMUSG00000003505	Psg18	transcript	0	0	NA	1	1
ENSMUST00000003599	ENSMUSG00000103088	Pcdhgb6	transcript	4.39511	4.76768	-0.117387	0.785758	1
ENSMUST00000003612	ENSMUSG00000003518	Dusp3	transcript	29.6988	30.0059	-0.0148404	0.946782	1
ENSMUST00000003620	ENSMUSG00000003526	Prodh	transcript	8.91911	8.8137	0.0171516	0.988992	1
ENSMUST00000003621	ENSMUSG00000003527	Dgcr14	transcript	6.81855	7.04564	-0.0472651	0.905957	1
ENSMUST00000003622	ENSMUSG00000003528	Slc25a1	transcript	11.4771	11.6283	-0.018886	0.952017	1
ENSMUST00000003628	ENSMUSG00000003534	Ddr1	transcript	5.17845	2.11062	1.29486	0.155524	1
ENSMUST00000003635	ENSMUSG00000003541	Ier3	transcript	4.37552	4.70458	-0.104611	0.854817	1
ENSMUST00000003640	ENSMUSG00000003545	Fosb	transcript	4.85326	6.68508	-0.46199	0.329488	1
ENSMUST00000003642	ENSMUSG00000003546	Klc4	transcript	5.41497	6.18756	-0.192418	0.692069	1
ENSMUST00000003643	ENSMUSG00000030399	Ckm	transcript	0.0227837	0.0104397	1.12592	0.736136	1
ENSMUST00000003645	ENSMUSG00000003549	Ercc1	transcript	5.66249	6.17974	-0.12611	0.811694	1
ENSMUST00000003655	ENSMUSG00000003559	As3mt	transcript	4.40673	4.05726	0.119205	0.854316	1
ENSMUST00000003659	ENSMUSG00000031849	Comp	transcript	0.087349	0.0629607	0.47234	0.646358	1
ENSMUST00000003669	ENSMUSG00000003573	Homer3	transcript	3.66044	3.67554	-0.00593941	0.974285	1
ENSMUST00000003677	ENSMUSG00000003581	Rnf215	transcript	7.03964	7.93206	-0.172194	0.72238	1
ENSMUST00000003681	ENSMUSG00000003585	Sec14l2	transcript	12.1362	12.4416	-0.0358549	0.914587	1
ENSMUST00000003687	ENSMUSG00000021253	Tgfb3	transcript	5.5301	5.23083	0.0802653	0.885617	1
ENSMUST00000003705	ENSMUSG00000003604	Aven	transcript	1.37156	1.10494	0.311849	0.62293	1
ENSMUST00000003710	ENSMUSG00000057230	Aak1	transcript	4.35289	4.28473	0.0227672	0.984881	1
ENSMUST00000003714	ENSMUSG00000003617	Cp	transcript	0.492293	0.526005	-0.0955584	0.880615	1
ENSMUST00000003717	ENSMUSG00000042476	Abcb4	transcript	1.23275	1.17903	0.0642779	0.939101	1
ENSMUST00000003720	ENSMUSG00000003623	Crot	transcript	10.6634	10.427	0.0323388	0.964911	1
ENSMUST00000003726	ENSMUSG00000024002	Brd4	transcript	0.228976	5.43322	-4.56854	0.00102446	0.114571
ENSMUST00000003741	ENSMUSG00000003644	Rps6ka1	transcript	0	0.313835	#NAME?	0.00295118	0.231524
ENSMUST00000003754	ENSMUSG00000003657	Calb2	transcript	22.3202	24.2185	-0.117762	0.801815	1
ENSMUST00000003759	ENSMUSG00000003662	Ciao1	transcript	10.8315	11.223	-0.0512289	0.89066	1
ENSMUST00000003762	ENSMUSG00000003665	Has1	transcript	0.292171	0.408377	-0.483089	0.542089	1
ENSMUST00000003777	ENSMUSG00000003680	Taf6l	transcript	1.0693	1.09184	-0.0300929	0.953101	1
ENSMUST00000003808	ENSMUSG00000038508	Gdf15	transcript	0.101604	0.110228	-0.117524	0.959635	1
ENSMUST00000003818	ENSMUSG00000003721	Insig2	transcript	13.4313	13.6939	-0.0279271	0.92715	1
ENSMUST00000003826	ENSMUSG00000032269	Htr3a	transcript	1.71689	1.69016	0.0226304	0.985543	1
ENSMUST00000003828	ENSMUSG00000003731	Kpna6	transcript	0.0166723	0.00865333	0.946128	0.726596	1
ENSMUST00000003843	ENSMUSG00000003746	Man1a	transcript	10.9357	9.95481	0.135574	0.770197	1
ENSMUST00000003850	ENSMUSG00000003752	Itpkc	transcript	2.68043	2.48303	0.110363	0.861239	1
ENSMUST00000003857	ENSMUSG00000089832	Shkbp1	transcript	2.00066	2.03606	-0.0253009	0.955916	1
ENSMUST00000003860	ENSMUSG00000003762	Adck4	transcript	1.73876	2.13308	-0.294882	0.642748	1
ENSMUST00000003870	ENSMUSG00000025025	Mxi1	transcript	2.39879	2.64441	-0.14064	0.773478	1
ENSMUST00000003876	ENSMUSG00000003778	Brd8	transcript	5.93606	7.55381	-0.347699	0.682471	1
ENSMUST00000003898	ENSMUSG00000022842	Ece2	transcript	1.18944	1.17995	0.0115527	0.994693	1
ENSMUST00000003906	ENSMUSG00000003808	Farsa	transcript	8.32586	9.11159	-0.130103	0.773399	1
ENSMUST00000003907	ENSMUSG00000003809	Gcdh	transcript	2.21821	3.54627	-0.676908	0.270145	1
ENSMUST00000003908	ENSMUSG00000003810	Mast2	transcript	0.02509	0.151777	-2.59677	0.0826317	1
ENSMUST00000003910	ENSMUSG00000003812	Dnase2a	transcript	1.26558	1.35071	-0.0939213	0.879873	1
ENSMUST00000003911	ENSMUSG00000003813	Rad23a	transcript	14.4161	13.2314	0.123714	0.806395	1
ENSMUST00000003912	ENSMUSG00000003814	Calr	transcript	148.81	151.083	-0.0218661	0.928244	1
ENSMUST00000003946	ENSMUSG00000003848	Nob1	transcript	9.26508	9.27584	-0.00167445	0.980271	1
ENSMUST00000003947	ENSMUSG00000003849	Nqo1	transcript	2.30886	1.84867	0.320694	0.650125	1
ENSMUST00000003961	ENSMUSG00000003863	Ppfia3	transcript	34.286	39.5229	-0.205069	0.58845	1
ENSMUST00000003964	ENSMUSG00000003865	Gys1	transcript	4.41902	4.31116	0.0356499	0.961936	1
ENSMUST00000003971	ENSMUSG00000003872	Lin7b	transcript	27.8027	31.9441	-0.200324	0.651735	1
ENSMUST00000003981	ENSMUSG00000003882	Il7r	transcript	0.150069	0.28489	-0.924777	0.27563	1
ENSMUST00000004036	ENSMUSG00000003934	Efnb3	transcript	30.3609	30.2243	0.00650391	0.990822	1
ENSMUST00000004050	ENSMUSG00000003948	Mmd	transcript	84.7678	75.9123	0.159183	0.69754	1
ENSMUST00000004051	ENSMUSG00000003949	Hlf	transcript	42.581	42.0895	0.0167498	0.991547	1
ENSMUST00000004054	ENSMUSG00000022905	Kpna1	transcript	37.9555	38.4702	-0.0194324	0.9349	1
ENSMUST00000004055	ENSMUSG00000042156	Dzip1	transcript	13.9922	12.9018	0.117052	0.809829	1
ENSMUST00000004057	ENSMUSG00000003955	Fam162a	transcript	19.8604	20.1301	-0.019454	0.95426	1
ENSMUST00000004072	ENSMUSG00000003970	Rpl8	transcript	173.511	169.787	0.0313004	0.959599	1
ENSMUST00000004076	ENSMUSG00000003974	Grm3	transcript	37.6774	41.139	-0.126806	0.720676	1
ENSMUST00000004094	ENSMUSG00000003992	Ssbp2	transcript	18.606	17.4111	0.0957603	0.837715	1
ENSMUST00000004097	ENSMUSG00000029705	Cux1	transcript	1.96011	2.16462	-0.143178	0.740811	1
ENSMUST00000004120	ENSMUSG00000004018	Fancl	transcript	2.07086	1.55233	0.415796	0.518452	1
ENSMUST00000004133	ENSMUSG00000004031	Brinp2	transcript	24.8902	27.4886	-0.14326	0.695096	1
ENSMUST00000004134	ENSMUSG00000004032	Gstm5	transcript	69.4414	75.9444	-0.129147	0.735457	1
ENSMUST00000004136	ENSMUSG00000004038	Gstm3	transcript	0.040375	0.0144663	1.48076	0.49469	1
ENSMUST00000004137	ENSMUSG00000004035	Gstm7	transcript	5.9413	6.41596	-0.110888	0.827529	1
ENSMUST00000004140	ENSMUSG00000058135	Gstm1	transcript	45.4004	51.0416	-0.168969	0.667489	1
ENSMUST00000004143	ENSMUSG00000020919	Stat5b	transcript	7.96581	9.06823	-0.187	0.650324	1
ENSMUST00000004145	ENSMUSG00000004043	Stat5a	transcript	0.755542	0.41754	0.855597	0.287023	1
ENSMUST00000004156	ENSMUSG00000004054	Map3k11	transcript	5.67717	5.54861	0.0330472	0.964994	1
ENSMUST00000004172	ENSMUSG00000004070	Hmox2	transcript	10.3602	15.1168	-0.545102	0.344433	1
ENSMUST00000004173	ENSMUSG00000004071	Cdip1	transcript	11.8472	10.4529	0.180646	0.722767	1
ENSMUST00000004200	ENSMUSG00000004096	Cwc15	transcript	22.694	18.2281	0.316151	0.532733	1
ENSMUST00000004201	ENSMUSG00000004098	Col5a3	transcript	0.276605	0.31853	-0.203602	0.782329	1
ENSMUST00000004202	ENSMUSG00000004099	Dnmt1	transcript	9.90612	9.1468	0.115054	0.810995	1
ENSMUST00000004203	ENSMUSG00000004100	Ppan	transcript	5.00569	5.33858	-0.092886	0.85458	1
ENSMUST00000004206	ENSMUSG00000070319	Eif3g	transcript	33.7209	31.2396	0.110267	0.82602	1
ENSMUST00000004208	ENSMUSG00000004105	Angptl2	transcript	1.24466	1.10361	0.173523	0.808716	1
ENSMUST00000004214	ENSMUSG00000004110	Cacna1e	transcript	0.000641333	0.000618	0.0534676	1	1
ENSMUST00000004222	ENSMUSG00000022702	Hira	transcript	13.573	13.9995	-0.0446354	0.895395	1
ENSMUST00000004232	ENSMUSG00000074207	Adh1	transcript	0.084075	0.0724183	0.215322	0.955157	1
ENSMUST00000004281	ENSMUSG00000028630	Dyrk2	transcript	15.293	14.3102	0.0958267	0.849637	1
ENSMUST00000004294	ENSMUSG00000004187	Kifc2	transcript	82.7809	86.9101	-0.0702255	0.831039	1
ENSMUST00000004316	ENSMUSG00000004207	Psap	transcript	55.3391	7.20643	2.94094	0.0019167	0.174387
ENSMUST00000004326	ENSMUSG00000031398	Plxna3	transcript	3.81425	3.82276	-0.00321409	0.974906	1
ENSMUST00000004327	ENSMUSG00000031400	G6pdx	transcript	10.3758	9.63157	0.107376	0.83511	1
ENSMUST00000004330	ENSMUSG00000004221	Ikbkg	transcript	0	0	NA	1	1
ENSMUST00000004340	ENSMUSG00000004231	Pax2	transcript	0.0227677	0.021496	0.0829182	1	1
ENSMUST00000004343	ENSMUSG00000004233	Wars2	transcript	2.76161	2.68986	0.0379786	0.962774	1
ENSMUST00000004375	ENSMUSG00000004264	Phb2	transcript	27.3846	30.1371	-0.138178	0.739325	1
ENSMUST00000004377	ENSMUSG00000004266	Ptpn6	transcript	0.152638	0.080949	0.915026	0.5802	1
ENSMUST00000004378	ENSMUSG00000004267	Eno2	transcript	242.89	266.549	-0.134098	0.694667	1
ENSMUST00000004379	ENSMUSG00000004268	Emg1	transcript	14.8566	14.4826	0.0367874	0.959999	1
ENSMUST00000004381	ENSMUSG00000004270	Lpcat3	transcript	4.85182	4.34995	0.157525	0.791627	1
ENSMUST00000004389	ENSMUSG00000072772	Grcc10	transcript	54.522	59.9699	-0.137401	0.729141	1
ENSMUST00000004392	ENSMUSG00000029771	Irf5	transcript	0.943126	0.857988	0.136493	0.937906	1
ENSMUST00000004396	ENSMUSG00000004285	Atp6v1f	transcript	61.9578	67.337	-0.120115	0.763953	1
ENSMUST00000004428	ENSMUSG00000004317	Clcn5	transcript	2.56471	2.76363	-0.107766	0.80291	1
ENSMUST00000004430	ENSMUSG00000004319	Clcn3	transcript	1.84604	1.13521	0.701476	0.349653	1
ENSMUST00000004453	ENSMUSG00000004341	Gpx6	transcript	0.25819	0.395031	-0.61353	0.506613	1
ENSMUST00000004456	ENSMUSG00000004344	Gpx5	transcript	0	0	NA	1	1
ENSMUST00000004470	ENSMUSG00000004356	Utp20	transcript	4.31448	4.06879	0.0845877	0.869687	1
ENSMUST00000004473	ENSMUSG00000004359	Spic	transcript	0.016077	0.0150803	0.0923299	1	1
ENSMUST00000004480	ENSMUSG00000004366	Sst	transcript	134.013	149.754	-0.160221	0.670437	1
ENSMUST00000004494	ENSMUSG00000031622	Sin3b	transcript	21.6234	20.7091	0.0623316	0.899507	1
ENSMUST00000004497	ENSMUSG00000004383	Large	transcript	7.36339	6.80102	0.11462	0.827686	1
ENSMUST00000004505	ENSMUSG00000020447	Npc1l1	transcript	0.270131	0.320471	-0.246533	0.743489	1
ENSMUST00000004507	ENSMUSG00000004393	Ddx56	transcript	11.5573	11.3488	0.0262646	0.974272	1
ENSMUST00000004508	ENSMUSG00000004394	Tmed4	transcript	20.0577	20.9206	-0.0607674	0.87265	1
ENSMUST00000004554	ENSMUSG00000012848	Rps5	transcript	127.505	136.712	-0.100595	0.779321	1
ENSMUST00000004560	ENSMUSG00000004446	Bid	transcript	2.1987	2.44955	-0.155867	0.786667	1
ENSMUST00000004565	ENSMUSG00000004451	Ralb	transcript	7.82193	8.35757	-0.0955587	0.822951	1
ENSMUST00000004574	ENSMUSG00000004460	Dnajb11	transcript	19.5862	21.5535	-0.138081	0.733887	1
ENSMUST00000004576	ENSMUSG00000004462	Tbccd1	transcript	3.78198	3.56039	0.0871041	0.892025	1
ENSMUST00000004587	ENSMUSG00000004473	Clec11a	transcript	1.76607	1.83044	-0.0516533	0.928346	1
ENSMUST00000004614	ENSMUSG00000058638	Zfp110	transcript	2.87068	2.71987	0.0778535	0.909003	1
ENSMUST00000004622	ENSMUSG00000004508	Gab2	transcript	5.20275	5.06015	0.0400959	0.950564	1
ENSMUST00000004634	ENSMUSG00000020142	Slc1a4	transcript	17.1369	14.984	0.193687	0.660794	1
ENSMUST00000004646	ENSMUSG00000004530	Coro1c	transcript	23.347	23.0504	0.0184446	0.986422	1
ENSMUST00000004655	ENSMUSG00000004540	Psg17	transcript	0.00516233	0	Inf	0.622316	1
ENSMUST00000004657	ENSMUSG00000004542	Psg19	transcript	0	0	NA	1	1
ENSMUST00000004673	ENSMUSG00000004558	Ndrg2	transcript	81.0809	74.1523	0.128871	0.7637	1
ENSMUST00000004681	ENSMUSG00000004565	Pnpla6	transcript	6.75767	8.17403	-0.274522	0.537497	1
ENSMUST00000004683	ENSMUSG00000004567	Mcoln1	transcript	17.3339	18.497	-0.0936895	0.81161	1
ENSMUST00000004684	ENSMUSG00000004568	Arhgef18	transcript	12.5048	13.7883	-0.140959	0.711811	1
ENSMUST00000004686	ENSMUSG00000069633	Pex11g	transcript	0.19217	0.219497	-0.191818	0.820414	1
ENSMUST00000004715	ENSMUSG00000061778	Mospd2	transcript	4.50156	4.6494	-0.046619	0.91323	1
ENSMUST00000004728	ENSMUSG00000004609	Cd33	transcript	0.039378	0.394036	-3.32286	0.00628772	0.383908
ENSMUST00000004729	ENSMUSG00000004610	Etfb	transcript	21.9084	21.2303	0.0453583	0.944528	1
ENSMUST00000004732	ENSMUSG00000004613	Lim2	transcript	0	0.011889	#NAME?	0.455965	1
ENSMUST00000004745	ENSMUSG00000004626	Stxbp2	transcript	1.87863	1.47704	0.346972	0.635848	1
ENSMUST00000004749	ENSMUSG00000004630	Pcp2	transcript	0	0	NA	1	1
ENSMUST00000004750	ENSMUSG00000004631	Sgce	transcript	0.855671	0.350659	1.28699	0.402915	1
ENSMUST00000004756	ENSMUSG00000004637	Wwox	transcript	3.5452	4.50509	-0.345687	0.539697	1
ENSMUST00000004761	ENSMUSG00000058440	Nrf1	transcript	0.0852003	0	Inf	0.045752	1
ENSMUST00000004770	ENSMUSG00000004651	Tyr	transcript	0.015568	0.0188267	-0.274194	0.942224	1
ENSMUST00000004774	ENSMUSG00000004655	Aqp1	transcript	1.50409	0.728445	1.046	0.173808	1
ENSMUST00000004780	ENSMUSG00000004661	Arid3b	transcript	1.10718	1.19485	-0.10994	0.848906	1
ENSMUST00000004784	ENSMUSG00000004665	Cnn2	transcript	1.80506	1.81013	-0.00405317	0.982875	1
ENSMUST00000004786	ENSMUSG00000004667	Polr2e	transcript	23.1335	23.0394	0.00588227	0.990632	1
ENSMUST00000004827	ENSMUSG00000004707	Ly9	transcript	0	0	NA	1	1
ENSMUST00000004829	ENSMUSG00000004709	Cd244	transcript	0	0.00506933	#NAME?	0.463359	1
ENSMUST00000004850	ENSMUSG00000004730	Emr1	transcript	0.209178	0.407144	-0.960805	0.621976	1
ENSMUST00000004868	ENSMUSG00000004748	Mtfp1	transcript	26.8032	27.6164	-0.0431188	0.902465	1
ENSMUST00000004892	ENSMUSG00000004771	Rab11a	transcript	0	0	NA	1	1
ENSMUST00000004910	ENSMUSG00000004788	Eif2b2	transcript	10.0884	10.1596	-0.0101428	0.964016	1
ENSMUST00000004913	ENSMUSG00000004791	Pgf	transcript	1.16545	0.942883	0.305736	0.68744	1
ENSMUST00000004920	ENSMUSG00000004798	Ulk2	transcript	23.5757	24.6979	-0.0670879	0.838362	1
ENSMUST00000004936	ENSMUSG00000004814	Ccl24	transcript	0.052331	0.0706127	-0.432261	0.751999	1
ENSMUST00000004943	ENSMUSG00000004821	Tmed11	transcript	0	0	NA	1	1
ENSMUST00000004949	ENSMUSG00000027164	Traf6	transcript	4.33281	4.36661	-0.0112126	0.959667	1
ENSMUST00000004955	ENSMUSG00000020528	Prpsap2	transcript	11.4496	13.2471	-0.210382	0.686424	1
ENSMUST00000004959	ENSMUSG00000004837	Grap	transcript	1.33235	1.2738	0.0648354	0.947369	1
ENSMUST00000004964	ENSMUSG00000004842	Pou1f1	transcript	0.00152933	0	Inf	1	1
ENSMUST00000004965	ENSMUSG00000004843	Chmp2b	transcript	22.5331	22.3015	0.014907	0.993733	1
ENSMUST00000004968	ENSMUSG00000004846	Plod3	transcript	6.6312	7.44768	-0.167521	0.700051	1
ENSMUST00000004985	ENSMUSG00000063952	Brpf3	transcript	7.68998	7.92495	-0.0434224	0.89894	1
ENSMUST00000004986	ENSMUSG00000004864	Mapk13	transcript	0.211417	0.154765	0.450011	0.662881	1
ENSMUST00000004990	ENSMUSG00000053436	Mapk14	transcript	10.7966	12.4692	-0.207802	0.617062	1
ENSMUST00000004994	ENSMUSG00000004872	Pax3	transcript	0	0	NA	1	1
ENSMUST00000005003	ENSMUSG00000004880	Lbr	transcript	4.57646	4.2925	0.0924112	0.871348	1
ENSMUST00000005014	ENSMUSG00000004894	Hapln2	transcript	10.0256	9.97494	0.00731033	0.987951	1
ENSMUST00000005015	ENSMUSG00000004895	Prcc	transcript	21.5367	20.9079	0.0427532	0.942602	1
ENSMUST00000005016	ENSMUSG00000004896	Rrnad1	transcript	3.43544	3.66981	-0.0952127	0.848791	1
ENSMUST00000005017	ENSMUSG00000004897	Hdgf	transcript	39.6089	41.6331	-0.0719036	0.836877	1
ENSMUST00000005019	ENSMUSG00000004885	Crabp2	transcript	1.65631	1.78687	-0.109466	0.893714	1
ENSMUST00000005041	ENSMUSG00000030435	U2af2	transcript	32.0517	30.9409	0.0508844	0.922453	1
ENSMUST00000005051	ENSMUSG00000063229	Ldha	transcript	2.87978	3.04996	-0.0828347	0.937858	1
ENSMUST00000005053	ENSMUSG00000004945	Tmem242	transcript	24.9077	25.904	-0.0565792	0.884048	1
ENSMUST00000005057	ENSMUSG00000004929	Thop1	transcript	11.6328	12.287	-0.0789418	0.840637	1
ENSMUST00000005064	ENSMUSG00000004934	Pias4	transcript	7.01388	7.05893	-0.00923841	0.966696	1
ENSMUST00000005066	ENSMUSG00000004936	Map2k1	transcript	92.3346	99.0883	-0.101843	0.768738	1
ENSMUST00000005067	ENSMUSG00000004937	Sgta	transcript	39.9603	39.6668	0.0106327	0.999064	1
ENSMUST00000005069	ENSMUSG00000004939	Nmrk2	transcript	0.0414993	0.023359	0.82911	0.51828	1
ENSMUST00000005072	ENSMUSG00000004947	Dtx2	transcript	0	0	NA	1	1
ENSMUST00000005073	ENSMUSG00000004948	Zp3	transcript	0.036874	0	Inf	0.171185	1
ENSMUST00000005077	ENSMUSG00000004951	Hspb1	transcript	6.38457	10.0191	-0.650091	0.282754	1
ENSMUST00000005103	ENSMUSG00000029832	Nfe2l3	transcript	1.54245	1.51766	0.0233719	0.986262	1
ENSMUST00000005108	ENSMUSG00000030180	Kdm5a	transcript	0.24131	0.0256823	3.23204	0.0197565	0.76913
ENSMUST00000005114	ENSMUSG00000004988	Fxyd4	transcript	0.0459277	0.0456273	0.00946515	1	1
ENSMUST00000005120	ENSMUSG00000004994	Ccdc130	transcript	0.71487	0.522793	0.451441	0.617025	1
ENSMUST00000005164	ENSMUSG00000005034	Prkacb	transcript	6.94621	4.33233	0.681085	0.502447	1
ENSMUST00000005173	ENSMUSG00000005043	Sgsh	transcript	1.76785	1.89662	-0.101434	0.846177	1
ENSMUST00000005175	ENSMUSG00000005045	Chd5	transcript	33.8945	33.3098	0.0251065	0.972829	1
ENSMUST00000005185	ENSMUSG00000005054	Cstb	transcript	14.6594	13.8945	0.0773154	0.908748	1
ENSMUST00000005188	ENSMUSG00000005057	Sh2b2	transcript	1.49107	2.35809	-0.661269	0.286486	1
ENSMUST00000005218	ENSMUSG00000005087	Cd44	transcript	0.212002	0.00691133	4.93897	0.000868411	0.103741
ENSMUST00000005220	ENSMUSG00000005089	Slc1a2	transcript	1.44393	0.406907	1.82723	0.0962259	1
ENSMUST00000005233	ENSMUSG00000005102	Eif2ak4	transcript	4.76658	4.73747	0.00883537	0.999344	1
ENSMUST00000005234	ENSMUSG00000005103	Wdr1	transcript	47.8759	48.1572	-0.00845243	0.95958	1
ENSMUST00000005238	ENSMUSG00000005107	Slc2a9	transcript	0	0	NA	1	1
ENSMUST00000005255	ENSMUSG00000005124	Wisp1	transcript	0.926786	1.16156	-0.325757	0.598982	1
ENSMUST00000005256	ENSMUSG00000005125	Ndrg1	transcript	30.6366	37.3391	-0.285431	0.454393	1
ENSMUST00000005262	ENSMUSG00000005131	4930550C14Rik	transcript	0.0751033	0.106884	-0.509097	0.677248	1
ENSMUST00000005279	ENSMUSG00000005148	Klf5	transcript	7.15756	5.7962	0.304358	0.588451	1
ENSMUST00000005292	ENSMUSG00000005161	Prdx2	transcript	53.3239	70.4647	-0.402118	0.318074	1
ENSMUST00000005334	ENSMUSG00000005202	Shbg	transcript	0.00763967	0	Inf	0.622286	1
ENSMUST00000005336	ENSMUSG00000005204	Senp3	transcript	22.3608	21.0281	0.0886557	0.855872	1
ENSMUST00000005352	ENSMUSG00000005220	Corin	transcript	0.063388	0.069915	-0.141392	0.882545	1
ENSMUST00000005364	ENSMUSG00000005232	G6pc2	transcript	0	0	NA	1	1
ENSMUST00000005365	ENSMUSG00000005233	Spc25	transcript	0.161161	0.019868	3.01999	0.0888709	1
ENSMUST00000005371	ENSMUSG00000059552	Trp53	transcript	2.34257	2.53328	-0.112914	0.848017	1
ENSMUST00000005394	ENSMUSG00000005262	Ufd1l	transcript	21.5694	20.784	0.0535111	0.924748	1
ENSMUST00000005399	ENSMUSG00000005267	Zfp287	transcript	0.857959	2.87296	-1.74356	0.0093254	0.483319
ENSMUST00000005406	ENSMUSG00000022892	App	transcript	982.606	436.559	1.17044	0.00164836	0.15821
ENSMUST00000005413	ENSMUSG00000052675	Zfp112	transcript	2.13908	2.80494	-0.390977	0.492033	1
ENSMUST00000005431	ENSMUSG00000005299	Letm1	transcript	16.5453	16.7815	-0.0204524	0.937066	1
ENSMUST00000005452	ENSMUSG00000005320	Fgfr4	transcript	0.0380227	0.0473523	-0.316576	0.805233	1
ENSMUST00000005470	ENSMUSG00000005338	Cadm3	transcript	51.1153	72.0321	-0.494885	0.250622	1
ENSMUST00000005477	ENSMUSG00000030483	Cyp2b10	transcript	0	0	NA	1	1
ENSMUST00000005487	ENSMUSG00000005354	Txn2	transcript	12.0918	11.0958	0.124014	0.819854	1
ENSMUST00000005488	ENSMUSG00000005355	Casp14	transcript	0.00831367	0	Inf	0.187855	1
ENSMUST00000005490	ENSMUSG00000005357	Slc1a6	transcript	3.81772	3.66936	0.0571799	0.939712	1
ENSMUST00000005493	ENSMUSG00000005360	Slc1a3	transcript	103.021	102.34	0.00956307	0.995774	1
ENSMUST00000005503	ENSMUSG00000005370	Msh6	transcript	6.27363	5.99005	0.0667307	0.90436	1
ENSMUST00000005504	ENSMUSG00000005371	Fbxo11	transcript	35.3513	35.3692	-0.000732753	0.973944	1
ENSMUST00000005507	ENSMUSG00000005373	Mlxipl	transcript	0.423205	0.316333	0.419914	0.599933	1
ENSMUST00000005509	ENSMUSG00000007207	Stx1a	transcript	54.7838	56.9111	-0.054959	0.867111	1
ENSMUST00000005518	ENSMUSG00000045098	Suv420h1	transcript	0.199296	0.254926	-0.355161	0.741021	1
ENSMUST00000005532	ENSMUSG00000005397	Nid1	transcript	2.08515	2.01131	0.0520193	0.930563	1
ENSMUST00000005548	ENSMUSG00000005413	Hmox1	transcript	2.37636	2.34348	0.020101	0.997199	1
ENSMUST00000005578	ENSMUSG00000005442	Cic	transcript	4.23749	9.47329	-1.16066	0.247456	1
ENSMUST00000005583	ENSMUSG00000005447	Pafah1b3	transcript	6.89165	4.5129	0.610793	0.342565	1
ENSMUST00000005592	ENSMUSG00000030468	Siglecg	transcript	0.0190393	0.0215743	-0.180333	1	1
ENSMUST00000005597	ENSMUSG00000056592	Zfp658	transcript	0.358145	0.283983	0.33474	0.717951	1
ENSMUST00000005600	ENSMUSG00000031706	Rfx1	transcript	4.52122	4.91449	-0.120328	0.784922	1
ENSMUST00000005601	ENSMUSG00000005465	Il27ra	transcript	0.067937	0.0776907	-0.193544	0.89348	1
ENSMUST00000005606	ENSMUSG00000005469	Prkaca	transcript	82.0117	85.2097	-0.0551871	0.861357	1
ENSMUST00000005607	ENSMUSG00000005470	Asf1b	transcript	0.20792	0.198341	0.0680432	1	1
ENSMUST00000005611	ENSMUSG00000005474	Myl10	transcript	0	0.0239617	#NAME?	0.463326	1
ENSMUST00000005616	ENSMUSG00000057672	Pkn1	transcript	8.57733	9.38509	-0.129842	0.757392	1
ENSMUST00000005620	ENSMUSG00000005483	Dnajb1	transcript	20.025	23.8325	-0.251127	0.544252	1
ENSMUST00000005630	ENSMUSG00000005493	Msh4	transcript	0.0432857	0.0284857	0.603653	0.701403	1
ENSMUST00000005643	ENSMUSG00000005506	Celf1	transcript	2.80638	2.00064	0.488249	0.390542	1
ENSMUST00000005647	ENSMUSG00000005510	Ndufs3	transcript	45.7811	49.821	-0.122001	0.756544	1
ENSMUST00000005651	ENSMUSG00000005514	Por	transcript	19.5842	19.9141	-0.0241008	0.934764	1
ENSMUST00000005669	ENSMUSG00000040583	Cyp2b13	transcript	0	0	NA	1	1
ENSMUST00000005671	ENSMUSG00000005533	Igf1r	transcript	20.6813	21.2945	-0.0421539	0.894132	1
ENSMUST00000005678	ENSMUSG00000005540	Fcer2a	transcript	0	0.0164437	#NAME?	0.0488735	1
ENSMUST00000005685	ENSMUSG00000005547	Cyp2a5	transcript	0.736691	0.170925	2.1077	0.202025	1
ENSMUST00000005692	ENSMUSG00000005553	Atp4a	transcript	0.072296	0.0906573	-0.326508	0.749485	1
ENSMUST00000005705	ENSMUSG00000005566	Trim28	transcript	32.2535	32.9047	-0.0288399	0.921039	1
ENSMUST00000005711	ENSMUSG00000033916	Chmp2a	transcript	36.468	39.9598	-0.131916	0.744959	1
ENSMUST00000005714	ENSMUSG00000005575	Ube2m	transcript	32.8751	23.7048	0.471818	0.322563	1
ENSMUST00000005719	ENSMUSG00000005580	Adcy9	transcript	24.1018	27.2182	-0.175429	0.63289	1
ENSMUST00000005722	ENSMUSG00000005583	Mef2c	transcript	5.2394	6.44391	-0.298537	0.656644	1
ENSMUST00000005749	ENSMUSG00000005609	Ctr9	transcript	13.5665	13.1524	0.0447239	0.938107	1
ENSMUST00000005751	ENSMUSG00000005611	Mrvi1	transcript	0.300717	0.658231	-1.13019	0.225195	1
ENSMUST00000005768	ENSMUSG00000028126	Pip5k1a	transcript	0	0	NA	1	1
ENSMUST00000005769	ENSMUSG00000005628	Tmod4	transcript	0.00146767	0	Inf	1	1
ENSMUST00000005791	ENSMUSG00000005649	Cabp5	transcript	0.0384133	0.0564377	-0.555051	0.850199	1
ENSMUST00000005798	ENSMUSG00000005656	Snx6	transcript	13.6479	14.2428	-0.0615551	0.87411	1
ENSMUST00000005810	ENSMUSG00000005667	Mthfd2	transcript	3.00521	2.25762	0.412666	0.519706	1
ENSMUST00000005815	ENSMUSG00000005672	Kit	transcript	8.1932	7.8055	0.0699357	0.895554	1
ENSMUST00000005817	ENSMUSG00000005674	Tomm40l	transcript	0.895754	0.986547	-0.139286	0.826194	1
ENSMUST00000005820	ENSMUSG00000005677	Nr1i3	transcript	0	0	NA	1	1
ENSMUST00000005824	ENSMUSG00000005681	Apoa2	transcript	0	0.186972	#NAME?	0.0974499	1
ENSMUST00000005825	ENSMUSG00000005682	Pan2	transcript	2.47633	2.73456	-0.143108	0.768506	1
ENSMUST00000005826	ENSMUSG00000005683	Cs	transcript	76.4821	77.4914	-0.0189139	0.936861	1
ENSMUST00000005829	ENSMUSG00000005686	Ampd3	transcript	0.672788	1.00407	-0.577632	0.391194	1
ENSMUST00000005830	ENSMUSG00000005687	Bcas2	transcript	20.5335	20.9302	-0.0276036	0.931715	1
ENSMUST00000005839	ENSMUSG00000005696	Sh2d1a	transcript	0	0	NA	1	1
ENSMUST00000005841	ENSMUSG00000005698	Ctcf	transcript	17.7855	16.7934	0.0828068	0.864609	1
ENSMUST00000005849	ENSMUSG00000005705	Agrp	transcript	0	0	NA	1	1
ENSMUST00000005860	ENSMUSG00000005716	Pvalb	transcript	31.0519	37.6084	-0.276373	0.520655	1
ENSMUST00000005862	ENSMUSG00000005718	Tfap4	transcript	1.58861	1.52247	0.0613482	0.943538	1
ENSMUST00000005889	ENSMUSG00000034116	Vav1	transcript	0.875222	1.0612	-0.277978	0.700093	1
ENSMUST00000005891	ENSMUSG00000047884	Klk9	transcript	0	0.00667667	#NAME?	0.454208	1
ENSMUST00000005907	ENSMUSG00000005763	Cd247	transcript	0.018275	0.0340023	-0.895762	0.824212	1
ENSMUST00000005923	ENSMUSG00000005779	Psmb4	transcript	65.0015	68.5541	-0.0767681	0.831	1
ENSMUST00000005933	ENSMUSG00000038968	Klk1b16	transcript	0	0	NA	1	1
ENSMUST00000005950	ENSMUSG00000049723	Mmp12	transcript	0.0155237	0.00140133	3.4696	0.0694478	1
ENSMUST00000005952	ENSMUSG00000005802	Slc30a4	transcript	17.2582	17.0939	0.013798	0.996953	1
ENSMUST00000005953	ENSMUSG00000005803	Sqrdl	transcript	1.86773	1.74978	0.0941093	0.904262	1
ENSMUST00000005954	ENSMUSG00000005804	Bloc1s6	transcript	7.94107	8.26653	-0.0579489	0.882337	1
ENSMUST00000005964	ENSMUSG00000028138	Adh5	transcript	18.7582	19.4278	-0.0506028	0.890781	1
ENSMUST00000005975	ENSMUSG00000005823	Gpr108	transcript	7.70729	7.62308	0.0158502	0.990944	1
ENSMUST00000005976	ENSMUSG00000005824	Tnfsf14	transcript	0	0.00529767	#NAME?	0.627084	1
ENSMUST00000006005	ENSMUSG00000032492	Pth1r	transcript	1.00764	1.57682	-0.646046	0.362069	1
ENSMUST00000006020	ENSMUSG00000005864	Cnga2	transcript	0.124646	0.0360913	1.78811	0.236734	1
ENSMUST00000006027	ENSMUSG00000005873	Reep5	transcript	118.155	119.751	-0.0193513	0.934564	1
ENSMUST00000006029	ENSMUSG00000078954	Arhgap8	transcript	0	0	NA	1	1
ENSMUST00000006035	ENSMUSG00000005881	Ergic3	transcript	34.8942	12.2966	1.50473	0.0220675	0.828022
ENSMUST00000006036	ENSMUSG00000005882	Uqcc1	transcript	0	0	NA	1	1
ENSMUST00000006037	ENSMUSG00000005886	Ncoa2	transcript	5.65817	5.68662	-0.00723673	0.965919	1
ENSMUST00000006046	ENSMUSG00000005892	Trh	transcript	6.54428	5.49216	0.252861	0.683982	1
ENSMUST00000006053	ENSMUSG00000005899	Smpd4	transcript	2.42255	2.85834	-0.238655	0.667763	1
ENSMUST00000006061	ENSMUSG00000005907	Pex1	transcript	0	0.0787107	#NAME?	0.0123572	0.576277
ENSMUST00000006071	ENSMUSG00000005917	Otx1	transcript	1.28743	1.25597	0.0356915	0.970369	1
ENSMUST00000006094	ENSMUSG00000022445	Cyp2d26	transcript	0.032249	0.0312333	0.0461679	1	1
ENSMUST00000006101	ENSMUSG00000005947	Itgae	transcript	0.0275923	0.0261997	0.074719	1	1
ENSMUST00000006103	ENSMUSG00000005949	Ctns	transcript	2.55979	2.75184	-0.104372	0.87494	1
ENSMUST00000006104	ENSMUSG00000005950	P2rx5	transcript	0.248761	0.263801	-0.0846879	0.9322	1
ENSMUST00000006105	ENSMUSG00000005951	Shpk	transcript	1.18612	1.09329	0.117572	0.876874	1
ENSMUST00000006106	ENSMUSG00000005952	Trpv1	transcript	0	0	NA	1	1
ENSMUST00000006112	ENSMUSG00000005958	Ephb3	transcript	5.43039	5.17003	0.0708814	0.897173	1
ENSMUST00000006123	ENSMUSG00000005968	Tuft1	transcript	0.632635	0.489506	0.370049	0.657501	1
ENSMUST00000006128	ENSMUSG00000005973	Rcn1	transcript	9.53762	11.6177	-0.28462	0.53031	1
ENSMUST00000006136	ENSMUSG00000005980	Dnase1	transcript	0.05414	0.050607	0.0973579	1	1
ENSMUST00000006137	ENSMUSG00000005981	Trap1	transcript	21.8672	21.249	0.0413773	0.945822	1
ENSMUST00000006151	ENSMUSG00000005994	Tyrp1	transcript	0.028668	0.0663907	-1.21154	0.258644	1
ENSMUST00000006167	ENSMUSG00000006010	BC003331	transcript	0.0360157	0.008911	2.01497	0.284757	1
ENSMUST00000006171	ENSMUSG00000006014	Prg4	transcript	0.626432	0.010358	5.91834	0.00173489	0.164307
ENSMUST00000006178	ENSMUSG00000006021	Kptn	transcript	5.95116	8.31423	-0.482411	0.359321	1
ENSMUST00000006181	ENSMUSG00000006024	Napa	transcript	59.5265	64.6651	-0.119456	0.735303	1
ENSMUST00000006209	ENSMUSG00000006050	Sra1	transcript	0.191392	0.346923	-0.858086	0.666287	1
ENSMUST00000006217	ENSMUSG00000006058	Snf8	transcript	21.8796	22.7893	-0.0587645	0.881233	1
ENSMUST00000006221	ENSMUSG00000020128	Vps54	transcript	1.16832	0.987447	0.242665	0.722722	1
ENSMUST00000006235	ENSMUSG00000021939	Ctsb	transcript	94.1317	93.2513	0.0135567	0.995473	1
ENSMUST00000006254	ENSMUSG00000006095	Tbcb	transcript	26.3946	27.9523	-0.0827223	0.830962	1
ENSMUST00000006286	ENSMUSG00000006127	Inpp5k	transcript	8.54099	9.65216	-0.176448	0.685383	1
ENSMUST00000006293	ENSMUSG00000006134	Crkl	transcript	15.952	15.8145	0.0124909	0.998142	1
ENSMUST00000006301	ENSMUSG00000029703	Lrwd1	transcript	2.86048	3.35315	-0.22926	0.68533	1
ENSMUST00000006303	ENSMUSG00000006143	Upk3bl	transcript	0	0.0311517	#NAME?	0.247182	1
ENSMUST00000006311	ENSMUSG00000030353	Tead4	transcript	0.0182517	0.111854	-2.61551	0.0400326	1
ENSMUST00000006341	ENSMUSG00000006179	Prss16	transcript	0.166629	0.201406	-0.273467	0.752388	1
ENSMUST00000006353	ENSMUSG00000006191	Cdkal1	transcript	6.50548	5.88199	0.145352	0.785298	1
ENSMUST00000006362	ENSMUSG00000006200	Rhox6	transcript	0	0	NA	1	1
ENSMUST00000006367	ENSMUSG00000006205	Htra1	transcript	69.0885	69.9943	-0.0187922	0.941514	1
ENSMUST00000006377	ENSMUSG00000006215	Zbtb17	transcript	9.75675	9.78459	-0.00411093	0.97333	1
ENSMUST00000006378	ENSMUSG00000006216	Clcnkb	transcript	0	0	NA	1	1
ENSMUST00000006380	ENSMUSG00000006218	Fam131c	transcript	1.48576	1.97453	-0.410311	0.559572	1
ENSMUST00000006381	ENSMUSG00000006219	Fblim1	transcript	0.233623	0.302054	-0.370626	0.653199	1
ENSMUST00000006391	ENSMUSG00000045827	Serpinb9	transcript	2.21625	2.09201	0.0832326	0.901927	1
ENSMUST00000006392	ENSMUSG00000021403	Serpinb9b	transcript	0.00495533	0	Inf	0.367662	1
ENSMUST00000006397	ENSMUSG00000006235	Epor	transcript	2.42978	2.22592	0.126422	0.860396	1
ENSMUST00000006403	ENSMUSG00000006241	Ccdc159	transcript	1.82685	2.47586	-0.438572	0.509737	1
ENSMUST00000006424	ENSMUSG00000006262	Mob1b	transcript	1.80153	1.66401	0.114554	0.873735	1
ENSMUST00000006431	ENSMUSG00000006269	Atp6v1b1	transcript	0.0458467	0	Inf	0.0317091	1
ENSMUST00000006435	ENSMUSG00000006273	Atp6v1b2	transcript	210.116	205.706	0.0305988	0.958177	1
ENSMUST00000006444	ENSMUSG00000006281	Tep1	transcript	1.08833	1.00174	0.119619	0.848873	1
ENSMUST00000006451	ENSMUSG00000006288	Ttc5	transcript	12.0787	12.2355	-0.018601	0.952935	1
ENSMUST00000006462	ENSMUSG00000006299	Aamp	transcript	22.7395	19.9417	0.189415	0.69668	1
ENSMUST00000006467	ENSMUSG00000006304	Arpc2	transcript	60.9891	34.8936	0.805589	0.0872329	1
ENSMUST00000006470	ENSMUSG00000006307	Kmt2b	transcript	6.68852	6.94457	-0.0541972	0.875688	1
ENSMUST00000006476	ENSMUSG00000006313	Upk1a	transcript	0.200555	0.0957987	1.06592	0.325578	1
ENSMUST00000006478	ENSMUSG00000006315	Tmem147	transcript	35.1932	35.6095	-0.0169653	0.949192	1
ENSMUST00000006496	ENSMUSG00000006333	Rps9	transcript	34.9188	33.5368	0.0582613	0.926515	1
ENSMUST00000006508	ENSMUSG00000006345	Ggt1	transcript	0.27443	0.221683	0.307938	0.84877	1
ENSMUST00000006523	ENSMUSG00000006360	Crip1	transcript	4.96048	6.38854	-0.365007	0.595577	1
ENSMUST00000006525	ENSMUSG00000006362	Cbfa2t3	transcript	0.700567	0.874303	-0.31961	0.641128	1
ENSMUST00000006544	ENSMUSG00000006378	Gcat	transcript	2.82254	3.12841	-0.148437	0.786338	1
ENSMUST00000006556	ENSMUSG00000006389	Mpl	transcript	0	0	NA	1	1
ENSMUST00000006557	ENSMUSG00000006390	Elovl1	transcript	3.10663	3.24851	-0.0644282	0.91886	1
ENSMUST00000006559	ENSMUSG00000035274	Tpbg	transcript	4.1689	3.4475	0.274117	0.626543	1
ENSMUST00000006565	ENSMUSG00000006398	Cdc20	transcript	0.516452	0.657037	-0.347339	0.678314	1
ENSMUST00000006578	ENSMUSG00000006411	Pvrl4	transcript	0.649565	0.39856	0.704678	0.475112	1
ENSMUST00000006579	ENSMUSG00000006412	Pfdn2	transcript	0.992652	0.597498	0.732354	0.392771	1
ENSMUST00000006587	ENSMUSG00000090213	Tmem189	transcript	12.0484	13.1961	-0.131265	0.75154	1
ENSMUST00000006611	ENSMUSG00000006442	Srm	transcript	23.4891	23.1414	0.0215152	0.98342	1
ENSMUST00000006614	ENSMUSG00000006445	Epha2	transcript	0.418647	0.420042	-0.00479701	0.994319	1
ENSMUST00000006618	ENSMUSG00000028919	Arhgef19	transcript	2.82867	2.86441	-0.0181113	0.956606	1
ENSMUST00000006625	ENSMUSG00000006456	Rbm14	transcript	7.41994	8.21515	-0.14688	0.737622	1
ENSMUST00000006626	ENSMUSG00000006457	Actn3	transcript	0.228573	0.318411	-0.478233	0.553581	1
ENSMUST00000006629	ENSMUSG00000020315	Sptbn1	transcript	4.02768	3.95684	0.0256019	0.974907	1
ENSMUST00000006632	ENSMUSG00000006463	Zdhhc24	transcript	5.60245	5.67813	-0.0193567	0.951808	1
ENSMUST00000006638	ENSMUSG00000006469	Slc34a3	transcript	0.0131027	0.0355633	-1.44053	0.399725	1
ENSMUST00000006646	ENSMUSG00000006476	Nsmf	transcript	39.9583	34.1596	0.226204	0.603991	1
ENSMUST00000006659	ENSMUSG00000006488	Prl7a1	transcript	0	0	NA	1	1
ENSMUST00000006660	ENSMUSG00000046899	Prl7a2	transcript	0	0	NA	1	1
ENSMUST00000006662	ENSMUSG00000006490	Prl8a9	transcript	0	0	NA	1	1
ENSMUST00000006664	ENSMUSG00000019756	Prl8a1	transcript	0	0	NA	1	1
ENSMUST00000006667	ENSMUSG00000045868	Gvin1	transcript	0.836929	0.83608	0.00146367	1	1
ENSMUST00000006669	ENSMUSG00000006494	Pdk1	transcript	11.8146	11.1711	0.0808067	0.870067	1
ENSMUST00000006679	ENSMUSG00000057729	Prtn3	transcript	0.390733	0.577115	-0.562677	0.534976	1
ENSMUST00000006687	ENSMUSG00000028359	Orm3	transcript	0	0.0299373	#NAME?	0.256149	1
ENSMUST00000006692	ENSMUSG00000006517	Mvd	transcript	5.98401	6.65155	-0.152577	0.756934	1
ENSMUST00000006697	ENSMUSG00000006522	Itih3	transcript	6.87742	8.93359	-0.377373	0.413092	1
ENSMUST00000006701	ENSMUSG00000006526	Tmem110	transcript	5.78162	5.81106	-0.00732864	0.970472	1
ENSMUST00000006703	ENSMUSG00000021922	Itih4	transcript	0.00524533	0.00969767	-0.886603	1	1
ENSMUST00000006704	ENSMUSG00000006529	Itih1	transcript	0	0	NA	1	1
ENSMUST00000006716	ENSMUSG00000033227	Wnt6	transcript	1.02475	0.853237	0.264254	0.732694	1
ENSMUST00000006718	ENSMUSG00000026167	Wnt10a	transcript	2.7371	3.03728	-0.150131	0.783916	1
ENSMUST00000006721	ENSMUSG00000006546	Cryba2	transcript	0.0932183	0	Inf	0.0591149	1
ENSMUST00000006742	ENSMUSG00000006567	Atp7b	transcript	0.543604	0.537141	0.0172543	0.997021	1
ENSMUST00000006745	ENSMUSG00000006570	Defb2	transcript	0	0	NA	1	1
ENSMUST00000006749	ENSMUSG00000006574	Slc4a1	transcript	0.039393	0.0832837	-1.08009	0.305008	1
ENSMUST00000006750	ENSMUSG00000006575	Rundc3a	transcript	65.6365	71.2957	-0.119318	0.742688	1
ENSMUST00000006754	ENSMUSG00000020923	Ubtf	transcript	0.140669	0.364606	-1.37403	0.470284	1
ENSMUST00000006760	ENSMUSG00000006585	Cdt1	transcript	0.693179	0.616747	0.168549	0.835197	1
ENSMUST00000006761	ENSMUSG00000006586	Runx1t1	transcript	0.83453	1.44457	-0.791609	0.211794	1
ENSMUST00000006762	ENSMUSG00000006587	Snai3	transcript	0.203206	0.390891	-0.943827	0.289733	1
ENSMUST00000006764	ENSMUSG00000006589	Aprt	transcript	13.2466	12.9361	0.0342214	0.965199	1
ENSMUST00000006774	ENSMUSG00000006599	Gtf2h1	transcript	12.1242	12.1287	-0.000543261	0.976939	1
ENSMUST00000006785	ENSMUSG00000021335	Slc17a1	transcript	0	0	NA	1	1
ENSMUST00000006786	ENSMUSG00000036110	Slc17a2	transcript	0	0	NA	1	1
ENSMUST00000006787	ENSMUSG00000006611	Hfe	transcript	0	0	NA	1	1
ENSMUST00000006792	ENSMUSG00000062524	Ncr1	transcript	0.01482	0	Inf	0.34705	1
ENSMUST00000006817	ENSMUSG00000006641	Slc5a6	transcript	0	5.73e-05	#NAME?	1	1
ENSMUST00000006818	ENSMUSG00000006642	Tcf23	transcript	0.125668	0.149799	-0.25341	0.788708	1
ENSMUST00000006825	ENSMUSG00000006649	Nphs1	transcript	0.262236	0.212403	0.304059	0.741486	1
ENSMUST00000006828	ENSMUSG00000006651	Aplp1	transcript	402.504	440.637	-0.130587	0.699982	1
ENSMUST00000006838	ENSMUSG00000032604	Qars	transcript	3.8326	3.76818	0.0244548	0.991091	1
ENSMUST00000006851	ENSMUSG00000006673	Qrich1	transcript	5.64264	6.57144	-0.21984	0.730024	1
ENSMUST00000006853	ENSMUSG00000006675	P4htm	transcript	23.0758	25.1488	-0.124106	0.756083	1
ENSMUST00000006854	ENSMUSG00000006676	Usp19	transcript	2.05692	1.58383	0.37707	0.569576	1
ENSMUST00000006856	ENSMUSG00000006678	Pola1	transcript	1.96595	1.80027	0.127014	0.83373	1
ENSMUST00000006893	ENSMUSG00000006711	D130043K22Rik	transcript	11.6568	10.4883	0.152391	0.742337	1
ENSMUST00000006898	ENSMUSG00000006715	Gmnn	transcript	0.704156	0.20745	1.76313	0.273008	1
ENSMUST00000006900	ENSMUSG00000006717	Acot13	transcript	38.0576	33.6731	0.176588	0.72317	1
ENSMUST00000006903	ENSMUSG00000006720	Zfp184	transcript	0.530571	0.223385	1.24801	0.184485	1
ENSMUST00000006911	ENSMUSG00000006728	Cdk4	transcript	7.7233	7.73599	-0.00236964	0.980511	1
ENSMUST00000006912	ENSMUSG00000026737	Pip4k2a	transcript	24.8956	24.2742	0.0364679	0.952003	1
ENSMUST00000006914	ENSMUSG00000006731	B4galnt1	transcript	30.7303	31.9125	-0.0544555	0.873179	1
ENSMUST00000006915	ENSMUSG00000006732	Mettl1	transcript	2.74817	2.94545	-0.100018	0.85832	1
ENSMUST00000006949	ENSMUSG00000006764	Tph2	transcript	0.213614	0.283307	-0.407362	0.633297	1
ENSMUST00000006952	ENSMUSG00000040017	Saa4	transcript	0	0	NA	1	1
ENSMUST00000006956	ENSMUSG00000040026	Saa3	transcript	0	0.019681	#NAME?	0.455929	1
ENSMUST00000006963	ENSMUSG00000055937	Krt28	transcript	0.0286107	0.086427	-1.59493	0.200857	1
ENSMUST00000006969	ENSMUSG00000006777	Krt23	transcript	0	0.00639267	#NAME?	0.628	1
ENSMUST00000006973	ENSMUSG00000020918	Kat2a	transcript	13.1502	13.6763	-0.0565919	0.878687	1
ENSMUST00000006976	ENSMUSG00000006784	Ttc25	transcript	0.028443	0.268754	-3.24014	0.0197364	0.76913
ENSMUST00000006991	ENSMUSG00000021730	Hcn1	transcript	25.1709	23.3587	0.107799	0.811654	1
ENSMUST00000007005	ENSMUSG00000023832	Acat2	transcript	9.37301	10.2067	-0.122926	0.772237	1
ENSMUST00000007007	ENSMUSG00000060475	Wtap	transcript	6.08411	7.12589	-0.228022	0.654981	1
ENSMUST00000007012	ENSMUSG00000006818	Sod2	transcript	58.8977	59.4859	-0.0143365	0.94467	1
ENSMUST00000007042	ENSMUSG00000024474	Ik	transcript	28.7967	25.25	0.189621	0.678926	1
ENSMUST00000007046	ENSMUSG00000006850	Tmco6	transcript	2.75389	3.00728	-0.126988	0.829393	1
ENSMUST00000007130	ENSMUSG00000006932	Ctnnb1	transcript	108.886	109.933	-0.0138056	0.946001	1
ENSMUST00000007131	ENSMUSG00000020917	Acly	transcript	0.047761	0.0349743	0.449536	0.705029	1
ENSMUST00000007139	ENSMUSG00000006941	Eif1b	transcript	46.144	51.1002	-0.147186	0.716081	1
ENSMUST00000007156	ENSMUSG00000044485	Klk1b11	transcript	0	0	NA	1	1
ENSMUST00000007161	ENSMUSG00000006948	Klk4	transcript	0	0	NA	1	1
ENSMUST00000007171	ENSMUSG00000006958	Chrd	transcript	4.56666	4.5503	0.00517729	0.990917	1
ENSMUST00000007207	ENSMUSG00000022843	Clcn2	transcript	9.22095	9.87715	-0.0991807	0.804079	1
ENSMUST00000007212	ENSMUSG00000006998	Psmd2	transcript	65.6371	66.6126	-0.0212852	0.931795	1
ENSMUST00000007216	ENSMUSG00000022841	Ap2m1	transcript	5.80729	17.906	-1.62451	0.252098	1
ENSMUST00000007236	ENSMUSG00000007021	Syngr3	transcript	59.7759	64.664	-0.113399	0.751982	1
ENSMUST00000007245	ENSMUSG00000007030	Vwa7	transcript	0.202324	0.160293	0.335961	0.689306	1
ENSMUST00000007248	ENSMUSG00000007033	Hspa1l	transcript	0.23723	0.213485	0.15215	0.883474	1
ENSMUST00000007249	ENSMUSG00000007034	Slc44a4	transcript	0.115041	0.0837927	0.457252	0.715703	1
ENSMUST00000007250	ENSMUSG00000007035	Msh5	transcript	0.179915	0.1751	0.0391364	0.98758	1
ENSMUST00000007251	ENSMUSG00000007036	Abhd16a	transcript	24.5503	26.8708	-0.130296	0.739888	1
ENSMUST00000007253	ENSMUSG00000007038	Neu1	transcript	14.3131	14.3232	-0.0010162	0.977923	1
ENSMUST00000007255	ENSMUSG00000007039	Ddah2	transcript	2.99766	3.67461	-0.293755	0.68209	1
ENSMUST00000007257	ENSMUSG00000007041	Clic1	transcript	3.88932	3.97118	-0.0300497	0.949674	1
ENSMUST00000007259	ENSMUSG00000073413	Ly6g6d	transcript	0.174958	0.143089	0.290102	0.880081	1
ENSMUST00000007266	ENSMUSG00000007050	Lsm2	transcript	0.416727	0.315338	0.402202	0.683719	1
ENSMUST00000007272	ENSMUSG00000045545	Krt14	transcript	0	0	NA	1	1
ENSMUST00000007275	ENSMUSG00000044041	Krt13	transcript	0	0	NA	1	1
ENSMUST00000007280	ENSMUSG00000053797	Krt16	transcript	0.00910733	0	Inf	0.636661	1
ENSMUST00000007296	ENSMUSG00000007080	Pole	transcript	0.204897	0.215667	-0.0739066	0.914938	1
ENSMUST00000007301	ENSMUSG00000020908	Myh3	transcript	0	0	NA	1	1
ENSMUST00000007317	ENSMUSG00000020911	Krt19	transcript	0.0775027	0.0372943	1.05529	0.464287	1
ENSMUST00000007318	ENSMUSG00000048981	Krt31	transcript	0	0.006229	#NAME?	0.62705	1
ENSMUST00000007340	ENSMUSG00000022229	Atp12a	transcript	0.0433957	0.033079	0.391635	0.790392	1
ENSMUST00000007423	ENSMUSG00000007279	Scube2	transcript	0.00303167	0.0267577	-3.14177	0.180467	1
ENSMUST00000007433	ENSMUSG00000098306	Gm28040	transcript	0.0141437	0.032703	-1.20927	0.848182	1
ENSMUST00000007444	ENSMUSG00000069631	Strada	transcript	5.09502	5.49412	-0.1088	0.823433	1
ENSMUST00000007449	ENSMUSG00000052131	Akr1b7	transcript	0	0.007406	#NAME?	0.627016	1
ENSMUST00000007482	ENSMUSG00000007338	Mrpl49	transcript	14.0671	13.7413	0.033802	0.9602	1
ENSMUST00000007533	ENSMUSG00000078656	Vps25	transcript	1.85661	3.32231	-0.839517	0.405541	1
ENSMUST00000007559	ENSMUSG00000007415	Gatad1	transcript	20.8667	24.5368	-0.23374	0.625822	1
ENSMUST00000007584	ENSMUSG00000103255	PCDHA9	transcript	1.57292	1.52695	0.0427966	0.962103	1
ENSMUST00000007601	ENSMUSG00000007457	2310003L06Rik	transcript	0.0161107	0.0169093	-0.0698036	1	1
ENSMUST00000007602	ENSMUSG00000007458	M6pr	transcript	29.2795	28.2865	0.0497753	0.928488	1
ENSMUST00000007708	ENSMUSG00000007564	Ppp2r1a	transcript	170.023	172.734	-0.0228279	0.927164	1
ENSMUST00000007733	ENSMUSG00000007589	Tinf2	transcript	3.73379	3.66765	0.0257828	0.979947	1
ENSMUST00000007735	ENSMUSG00000007591	Tssk4	transcript	0	0	NA	1	1
ENSMUST00000007738	ENSMUSG00000007594	Hapln4	transcript	35.404	33.2732	0.0895512	0.841014	1
ENSMUST00000007747	ENSMUSG00000007603	Dus3l	transcript	12.7697	13.0125	-0.0271684	0.930694	1
ENSMUST00000007754	ENSMUSG00000007610	Gtpbp3	transcript	5.64997	6.57895	-0.219614	0.634404	1
ENSMUST00000007757	ENSMUSG00000007613	Tgfbr1	transcript	6.14127	5.97863	0.0387234	0.953946	1
ENSMUST00000007790	ENSMUSG00000007646	Rad51c	transcript	0	0	NA	1	1
ENSMUST00000007797	ENSMUSG00000007653	Gabrb2	transcript	65.503	65.0395	0.0102452	0.996706	1
ENSMUST00000007799	ENSMUSG00000007655	Cav1	transcript	0.191598	0.0688163	1.47726	0.259136	1
ENSMUST00000007800	ENSMUSG00000007656	Arpp19	transcript	1.29051	1.52578	-0.24161	0.728726	1
ENSMUST00000007803	ENSMUSG00000007659	Bcl2l1	transcript	8.10149	4.02432	1.00944	0.109266	1
ENSMUST00000007814	ENSMUSG00000007670	Khsrp	transcript	33.4098	33.0252	0.0167003	0.988441	1
ENSMUST00000007865	ENSMUSG00000007721	Ccdc124	transcript	30.1729	32.196	-0.0936249	0.815687	1
ENSMUST00000007884	ENSMUSG00000023882	Zfp54	transcript	0.118098	0	Inf	0.00330774	0.245873
ENSMUST00000007921	ENSMUSG00000007777	0610009B22Rik	transcript	10.013	10.5532	-0.0757983	0.878201	1
ENSMUST00000007949	ENSMUSG00000007805	Twist2	transcript	0.313365	0.32315	-0.0443615	0.981129	1
ENSMUST00000007959	ENSMUSG00000007815	Rhoa	transcript	57.6892	55.4096	0.0581658	0.90551	1
ENSMUST00000007961	ENSMUSG00000007817	Zmiz1	transcript	18.4076	13.3862	0.459553	0.511598	1
ENSMUST00000007977	ENSMUSG00000007833	Aldh16a1	transcript	1.19048	1.35577	-0.187568	0.756605	1
ENSMUST00000007980	ENSMUSG00000007836	Hnrnpa0	transcript	49.7557	45.1559	0.139948	0.742284	1
ENSMUST00000007981	ENSMUSG00000007837	Prrg2	transcript	1.25955	1.35322	-0.103495	0.899248	1
ENSMUST00000007993	ENSMUSG00000029701	Rbm28	transcript	6.82856	6.89812	-0.0146223	0.953471	1
ENSMUST00000008004	ENSMUSG00000057788	Ddx49	transcript	8.38721	7.7764	0.109089	0.83809	1
ENSMUST00000008016	ENSMUSG00000007872	Id3	transcript	13.5991	12.0228	0.177728	0.731803	1
ENSMUST00000008021	ENSMUSG00000007877	Tcap	transcript	1.03361	1.59207	-0.623211	0.432369	1
ENSMUST00000008024	ENSMUSG00000007880	Arid1a	transcript	0.0141887	0.0104457	0.441834	0.863394	1
ENSMUST00000008032	ENSMUSG00000007888	Crlf1	transcript	1.18456	1.20331	-0.022651	0.96595	1
ENSMUST00000008036	ENSMUSG00000007892	Rplp1	transcript	526.165	599.197	-0.187515	0.599997	1
ENSMUST00000008051	ENSMUSG00000007907	Cabs1	transcript	0	0.00654367	#NAME?	0.454168	1
ENSMUST00000008052	ENSMUSG00000007908	Hmgcll1	transcript	4.27106	4.52272	-0.0825967	0.847106	1
ENSMUST00000008088	ENSMUSG00000007944	Ttc9b	transcript	60.4922	72.5305	-0.261839	0.52111	1
ENSMUST00000008090	ENSMUSG00000007946	Phox2a	transcript	0.0100183	0.0122413	-0.289118	1	1
ENSMUST00000008094	ENSMUSG00000007950	Abhd8	transcript	89.6042	97.5512	-0.122594	0.726027	1
ENSMUST00000008131	ENSMUSG00000007987	Ift22	transcript	24.3907	24.3287	0.00367166	0.986842	1
ENSMUST00000008179	ENSMUSG00000008035	Mid1ip1	transcript	22.9105	20.6322	0.151107	0.749322	1
ENSMUST00000008273	ENSMUSG00000030069	Prok2	transcript	0	0	NA	1	1
ENSMUST00000008280	ENSMUSG00000008136	Fhl2	transcript	16.0315	16.6522	-0.0548046	0.887865	1
ENSMUST00000008284	ENSMUSG00000008140	Emc10	transcript	40.1884	39.1931	0.0361807	0.949417	1
ENSMUST00000008297	ENSMUSG00000008153	Clstn3	transcript	113.525	123.948	-0.126727	0.710542	1
ENSMUST00000008350	ENSMUSG00000008206	Cers4	transcript	4.19393	4.31735	-0.0418451	0.902486	1
ENSMUST00000008445	ENSMUSG00000008301	Phax	transcript	12.9505	12.4092	0.0616062	0.918225	1
ENSMUST00000008451	ENSMUSG00000008307	1700109H08Rik	transcript	0.942278	0.846012	0.155475	0.876836	1
ENSMUST00000008462	ENSMUSG00000008318	Relt	transcript	4.49458	4.62078	-0.0399499	0.920859	1
ENSMUST00000008477	ENSMUSG00000008333	Snrpb2	transcript	7.88247	7.04646	0.16175	0.761318	1
ENSMUST00000008517	ENSMUSG00000008373	Prpf31	transcript	5.76417	5.72308	0.0103205	0.99765	1
ENSMUST00000008528	ENSMUSG00000008384	Sertad1	transcript	5.33903	5.40621	-0.0180383	0.964755	1
ENSMUST00000008537	ENSMUSG00000008393	Carhsp1	transcript	14.1284	16.5768	-0.230566	0.576156	1
ENSMUST00000008542	ENSMUSG00000008398	Elk3	transcript	1.65693	1.55972	0.0872305	0.899072	1
ENSMUST00000008573	ENSMUSG00000008429	Herpud2	transcript	17.7611	17.9377	-0.0142701	0.953315	1
ENSMUST00000008579	ENSMUSG00000008435	Rdh13	transcript	5.4503	5.75791	-0.079211	0.852829	1
ENSMUST00000008582	ENSMUSG00000008438	Adam21	transcript	0.114177	0.237204	-1.05486	0.258957	1
ENSMUST00000008594	ENSMUSG00000008450	Nutf2	transcript	11.8464	11.9576	-0.0134834	0.957708	1
ENSMUST00000008605	ENSMUSG00000008461	Fut1	transcript	0.0124957	0.0129903	-0.0560106	1	1
ENSMUST00000008626	ENSMUSG00000008482	Rnf151	transcript	0.136791	0.318695	-1.22021	0.412069	1
ENSMUST00000008633	ENSMUSG00000008489	Elavl2	transcript	1.19255	1.33845	-0.166517	0.796166	1
ENSMUST00000008684	ENSMUSG00000008540	Mgst1	transcript	3.66353	3.20322	0.19371	0.783833	1
ENSMUST00000008733	ENSMUSG00000029131	Dnajb6	transcript	5.45476	8.49205	-0.638597	0.180799	1
ENSMUST00000008734	ENSMUSG00000008590	Htr3b	transcript	0.0133717	0.00551367	1.2781	0.885547	1
ENSMUST00000008745	ENSMUSG00000008601	Rab25	transcript	0.144169	0.021567	2.74087	0.072058	1
ENSMUST00000008748	ENSMUSG00000008604	Ubqln4	transcript	35.5226	36.8245	-0.0519279	0.871967	1
ENSMUST00000008801	ENSMUSG00000073424	Cyp4f15	transcript	3.8281	3.9082	-0.0298748	0.94951	1
ENSMUST00000008812	ENSMUSG00000008668	Rps18	transcript	66.4215	70.4103	-0.0841355	0.909452	1
ENSMUST00000008826	ENSMUSG00000008682	Rpl10	transcript	89.0189	94.3176	-0.0834154	0.823588	1
ENSMUST00000008830	ENSMUSG00000094441	Zfp955a	transcript	8.3582	9.05519	-0.115553	0.798985	1
ENSMUST00000008878	ENSMUSG00000008734	Gprc5b	transcript	39.7547	41.9388	-0.0771607	0.820375	1
ENSMUST00000008893	ENSMUSG00000024835	Coro1b	transcript	11.4555	12.2662	-0.098645	0.81889	1
ENSMUST00000008907	ENSMUSG00000008763	Man1a2	transcript	24.2149	24.6785	-0.0273605	0.917721	1
ENSMUST00000008957	ENSMUSG00000008813	Tppp2	transcript	0	0	NA	1	1
ENSMUST00000008966	ENSMUSG00000008822	Acyp1	transcript	6.78904	7.47103	-0.138099	0.823323	1
ENSMUST00000008987	ENSMUSG00000008843	Cldn13	transcript	0	0.012417	#NAME?	0.633077	1
ENSMUST00000008991	ENSMUSG00000067889	Sptbn2	transcript	143.753	142.659	0.0110227	0.999014	1
ENSMUST00000008995	ENSMUSG00000026313	Hdac4	transcript	1.12106	0.818257	0.454236	0.51016	1
ENSMUST00000008999	ENSMUSG00000008855	Hdac5	transcript	6.5534	9.95331	-0.602933	0.185725	1
ENSMUST00000009003	ENSMUSG00000008859	Rala	transcript	21.5971	19.4376	0.151988	0.741935	1
ENSMUST00000009018	ENSMUSG00000008874	Clec3a	transcript	0.052083	0	Inf	0.23552	1
ENSMUST00000009036	ENSMUSG00000008892	Vdac3	transcript	53.8489	54.2279	-0.0101189	0.958559	1
ENSMUST00000009039	ENSMUSG00000058600	Rpl30	transcript	44.2236	17.5763	1.33119	0.0671985	1
ENSMUST00000009058	ENSMUSG00000028970	Abcb1b	transcript	0.870807	0.725907	0.262569	0.706087	1
ENSMUST00000009099	ENSMUSG00000021144	Mta1	transcript	1.15697	0.0955327	3.59821	2.47e-05	0.00857681
ENSMUST00000009102	ENSMUSG00000008958	Vps72	transcript	9.26407	9.88181	-0.0931289	0.835189	1
ENSMUST00000009120	ENSMUSG00000008976	Gabpa	transcript	5.28122	4.99541	0.0802688	0.881766	1
ENSMUST00000009138	ENSMUSG00000024006	Stk38	transcript	5.71256	5.33983	0.0973419	0.857483	1
ENSMUST00000009143	ENSMUSG00000008999	Bmp7	transcript	3.85811	4.17498	-0.113875	0.812471	1
ENSMUST00000009157	ENSMUSG00000009013	Dynll1	transcript	64.6241	66.2395	-0.0356192	0.903545	1
ENSMUST00000009174	ENSMUSG00000009030	Pdcl	transcript	6.10746	6.57248	-0.105866	0.8093	1
ENSMUST00000009191	ENSMUSG00000009047	Gm5965	transcript	0	0	NA	1	1
ENSMUST00000009214	ENSMUSG00000009070	Rsph14	transcript	0	0	NA	1	1
ENSMUST00000009219	ENSMUSG00000009075	Cabp7	transcript	20.7843	21.6055	-0.0559049	0.871399	1
ENSMUST00000009220	ENSMUSG00000009076	Zmat5	transcript	8.70487	8.95671	-0.0411459	0.929867	1
ENSMUST00000009234	ENSMUSG00000009090	Ap1b1	transcript	26.6916	28.5712	-0.0981751	0.780543	1
ENSMUST00000009236	ENSMUSG00000009092	Derl3	transcript	0.575673	1.056	-0.875289	0.279341	1
ENSMUST00000009241	ENSMUSG00000009097	Tbx1	transcript	0.423656	0.286759	0.563052	0.53335	1
ENSMUST00000009256	ENSMUSG00000009112	Bcl2l13	transcript	8.76082	8.98992	-0.0372416	0.907972	1
ENSMUST00000009259	ENSMUSG00000009115	Spatc1l	transcript	0.00211333	0.026073	-3.62496	0.337334	1
ENSMUST00000009321	ENSMUSG00000022718	Dgcr8	transcript	4.80529	4.85883	-0.0159845	0.952969	1
ENSMUST00000009329	ENSMUSG00000009185	Ccl8	transcript	0.256376	0.169592	0.596195	0.747748	1
ENSMUST00000009340	ENSMUSG00000026536	Mnda	transcript	0.024993	0.0130327	0.939392	0.633773	1
ENSMUST00000009344	ENSMUSG00000000131	Xpo6	transcript	16.0282	15.1529	0.0810226	0.86504	1
ENSMUST00000009354	ENSMUSG00000009210	2310007L24Rik	transcript	0	0	NA	1	1
ENSMUST00000009356	ENSMUSG00000062345	Serpinb2	transcript	0	0	NA	1	1
ENSMUST00000009358	ENSMUSG00000009214	Tmem8c	transcript	0.104743	0.210758	-1.00873	0.312599	1
ENSMUST00000009390	ENSMUSG00000009246	Trpm5	transcript	0.004832	0.005207	-0.107832	1	1
ENSMUST00000009392	ENSMUSG00000009248	Ascl2	transcript	0.105666	0.058765	0.846482	0.389316	1
ENSMUST00000009396	ENSMUSG00000000244	Tspan32	transcript	0	0	NA	1	1
ENSMUST00000009411	ENSMUSG00000052763	Zfp212	transcript	4.86587	5.24581	-0.108469	0.812412	1
ENSMUST00000009420	ENSMUSG00000052751	Repin1	transcript	2.78285	2.70213	0.042466	0.962565	1
ENSMUST00000009425	ENSMUSG00000009281	Rarres2	transcript	4.99005	4.75249	0.070371	0.928609	1
ENSMUST00000009435	ENSMUSG00000009291	Pttg1ip	transcript	17.8333	19.5809	-0.134875	0.737129	1
ENSMUST00000009522	ENSMUSG00000009378	Slc16a12	transcript	1.05048	1.06804	-0.0239229	0.952273	1
ENSMUST00000009530	ENSMUSG00000001131	Timp1	transcript	0.298967	0.100489	1.57295	0.322206	1
ENSMUST00000009538	ENSMUSG00000009394	Syn2	transcript	28.7394	27.0056	0.0897745	0.847741	1
ENSMUST00000009550	ENSMUSG00000009406	Elk1	transcript	15.2805	15.1788	0.00963658	0.993912	1
ENSMUST00000009617	ENSMUSG00000027895	Kcnc4	transcript	18.7386	20.3609	-0.119782	0.754923	1
ENSMUST00000009667	ENSMUSG00000030838	Ush1c	transcript	0.0467433	0.0387213	0.271632	0.852546	1
ENSMUST00000009679	ENSMUSG00000009535	Rnmt	transcript	12.8221	12.3165	0.058049	0.910588	1
ENSMUST00000009689	ENSMUSG00000009545	Kcnq1	transcript	0.150336	0.214085	-0.509996	0.56981	1
ENSMUST00000009693	ENSMUSG00000009549	Srp14	transcript	58.2513	64.0418	-0.136723	0.730549	1
ENSMUST00000009695	ENSMUSG00000009551	6330409D20Rik	transcript	0.632899	0.668105	-0.0780988	0.941786	1
ENSMUST00000009699	ENSMUSG00000009555	Cdk9	transcript	23.5954	23.9773	-0.0231614	0.936745	1
ENSMUST00000009705	ENSMUSG00000026814	Eng	transcript	2.30976	2.42746	-0.0717031	0.901874	1
ENSMUST00000009707	ENSMUSG00000009563	Tor2a	transcript	8.11942	8.97368	-0.144323	0.764603	1
ENSMUST00000009713	ENSMUSG00000009569	Mkl2	transcript	0.751983	0.787597	-0.0667576	0.949324	1
ENSMUST00000009727	ENSMUSG00000022415	Syngr1	transcript	115.526	128.504	-0.153597	0.658793	1
ENSMUST00000009728	ENSMUSG00000022415	Syngr1	transcript	3.77566	2.76283	0.450584	0.524535	1
ENSMUST00000009732	ENSMUSG00000009588	St6galnac1	transcript	0.00291367	0	Inf	0.622272	1
ENSMUST00000009740	ENSMUSG00000009596	Taf7l	transcript	0.008339	0.0118457	-0.506413	1	1
ENSMUST00000009772	ENSMUSG00000009628	Tex15	transcript	0.283134	0.186798	0.600007	0.574012	1
ENSMUST00000009774	ENSMUSG00000009630	Ppp2cb	transcript	50.7114	45.4171	0.159073	0.715052	1
ENSMUST00000009777	ENSMUSG00000009633	G0s2	transcript	2.88842	3.13818	-0.119647	0.850943	1
ENSMUST00000009789	ENSMUSG00000019916	P4ha1	transcript	8.63152	5.67735	0.604397	0.415183	1
ENSMUST00000009790	ENSMUSG00000009646	Pla2g12b	transcript	0	0	NA	1	1
ENSMUST00000009791	ENSMUSG00000009647	Mcu	transcript	0.169353	0.125679	0.43029	0.632617	1
ENSMUST00000009798	ENSMUSG00000009654	Oit3	transcript	0.00948933	0.0246503	-1.37723	0.297446	1
ENSMUST00000009814	ENSMUSG00000009670	Tex11	transcript	0.0219497	0.02242	-0.0305872	1	1
ENSMUST00000009831	ENSMUSG00000009687	Fxyd5	transcript	0.301615	0.0962973	1.64714	0.257868	1
ENSMUST00000009875	ENSMUSG00000009731	Kcnd1	transcript	1.95702	2.25391	-0.203774	0.690164	1
ENSMUST00000009877	ENSMUSG00000009733	Tfcp2	transcript	5.98264	6.09625	-0.0271389	0.936113	1
ENSMUST00000009885	ENSMUSG00000009741	Ubp1	transcript	5.77729	5.71525	0.0155757	0.995562	1
ENSMUST00000009972	ENSMUSG00000009828	Ick	transcript	0.417678	0.320332	0.382822	0.721363	1
ENSMUST00000010007	ENSMUSG00000009863	Sdhb	transcript	64.12	73.9017	-0.204834	0.599664	1
ENSMUST00000010020	ENSMUSG00000009876	Cox4i2	transcript	0.6949	0.668748	0.0553427	0.967467	1
ENSMUST00000010038	ENSMUSG00000009894	Snap47	transcript	79.2166	84.581	-0.0945318	0.784486	1
ENSMUST00000010044	ENSMUSG00000009900	Wnt3a	transcript	0.0203827	0.0123847	0.718788	0.829736	1
ENSMUST00000010049	ENSMUSG00000009905	Kdsr	transcript	7.48911	7.83968	-0.0660002	0.859622	1
ENSMUST00000010085	ENSMUSG00000009941	Nxf2	transcript	0.0447777	0.0172783	1.37382	0.658193	1
ENSMUST00000010127	ENSMUSG00000031397	Tktl1	transcript	0.0407383	0.0326323	0.320085	0.900948	1
ENSMUST00000010188	ENSMUSG00000010044	Zmynd10	transcript	0.695128	0.885512	-0.349233	0.635975	1
ENSMUST00000010189	ENSMUSG00000010045	Tmem115	transcript	11.7541	12.984	-0.14357	0.737159	1
ENSMUST00000010191	ENSMUSG00000010047	Hyal2	transcript	0.632616	0.172224	1.87704	0.171061	1
ENSMUST00000010192	ENSMUSG00000010048	Ifrd2	transcript	2.36571	2.43348	-0.0407461	0.934789	1
ENSMUST00000010195	ENSMUSG00000010051	Hyal1	transcript	0.854052	0.936423	-0.132838	0.849359	1
ENSMUST00000010198	ENSMUSG00000010054	Tusc2	transcript	32.0663	34.9453	-0.12404	0.751147	1
ENSMUST00000010201	ENSMUSG00000010057	Nprl2	transcript	10.6632	11.0707	-0.0541096	0.894854	1
ENSMUST00000010205	ENSMUSG00000034837	Gnat1	transcript	0.026488	0.024866	0.0911645	1	1
ENSMUST00000010208	ENSMUSG00000010064	Slc38a3	transcript	1.95767	1.28037	0.612577	0.5175	1
ENSMUST00000010210	ENSMUSG00000010066	Cacna2d2	transcript	1.05079	1.29775	-0.304544	0.618632	1
ENSMUST00000010211	ENSMUSG00000010067	Rassf1	transcript	4.31186	4.25187	0.0202149	0.989631	1
ENSMUST00000010239	ENSMUSG00000010095	Slc3a2	transcript	11.5774	12.0921	-0.0627556	0.871796	1
ENSMUST00000010241	ENSMUSG00000010097	Nxf1	transcript	2.78382	3.42161	-0.297611	0.599879	1
ENSMUST00000010248	ENSMUSG00000010097	Nxf1	transcript	13.3915	16.6136	-0.311042	0.556832	1
ENSMUST00000010249	ENSMUSG00000003680	Taf6l	transcript	2.60972	2.7223	-0.0609324	0.918649	1
ENSMUST00000010250	ENSMUSG00000024650	Slc22a6	transcript	2.01283	1.94119	0.0522841	0.942169	1
ENSMUST00000010251	ENSMUSG00000063796	Slc22a8	transcript	3.0049	2.77027	0.117293	0.846927	1
ENSMUST00000010254	ENSMUSG00000010110	Stx5a	transcript	0.795367	0.574247	0.469949	0.709129	1
ENSMUST00000010267	ENSMUSG00000010122	Slc47a1	transcript	0.95333	0.997802	-0.0657774	0.925414	1
ENSMUST00000010278	ENSMUSG00000000561	Wdr77	transcript	10.6862	10.0088	0.0944929	0.852434	1
ENSMUST00000010279	ENSMUSG00000074344	Adora3	transcript	0.012281	0.012764	-0.0556525	1	1
ENSMUST00000010280	ENSMUSG00000010136	Pifo	transcript	0.0496903	0.0203693	1.28657	0.428279	1
ENSMUST00000010286	ENSMUSG00000010142	Tnfrsf13b	transcript	0.221724	0.290144	-0.388	0.62945	1
ENSMUST00000010298	ENSMUSG00000010154	Spire2	transcript	5.73093	6.14045	-0.0995749	0.827313	1
ENSMUST00000010319	ENSMUSG00000010175	Prox1	transcript	0.263827	0.538501	-1.02936	0.330779	1
ENSMUST00000010348	ENSMUSG00000079677	Fdx1l	transcript	18.1285	20.4818	-0.176086	0.704493	1
ENSMUST00000010421	ENSMUSG00000010277	2610507B11Rik	transcript	44.2421	46.1442	-0.0607309	0.847822	1
ENSMUST00000010434	ENSMUSG00000010290	AI597479	transcript	10.1131	9.98667	0.0181469	0.989236	1
ENSMUST00000010451	ENSMUSG00000010307	Tmem86a	transcript	6.32013	6.66585	-0.0768336	0.868706	1
ENSMUST00000010502	ENSMUSG00000010358	Ifi35	transcript	1.19469	1.45253	-0.281931	0.699675	1
ENSMUST00000010506	ENSMUSG00000010362	Rdm1	transcript	1.47101	1.97236	-0.423114	0.550973	1
ENSMUST00000010520	ENSMUSG00000010376	Nedd8	transcript	58.968	63.183	-0.099602	0.802962	1
ENSMUST00000010536	ENSMUSG00000010392	Gosr1	transcript	12.0918	12.5122	-0.0493031	0.885004	1
ENSMUST00000010550	ENSMUSG00000010406	Mrpl52	transcript	21.5091	21.4664	0.00286457	0.984205	1
ENSMUST00000010579	ENSMUSG00000010435	Spaca7	transcript	0	0	NA	1	1
ENSMUST00000010597	ENSMUSG00000010453	Kansl3	transcript	9.31036	11.2347	-0.271052	0.512838	1
ENSMUST00000010673	ENSMUSG00000010529	Gm266	transcript	1.40425	1.47576	-0.0716595	0.914524	1
ENSMUST00000010682	ENSMUSG00000010538	Tsacc	transcript	0.0921813	0.010348	3.15512	0.251504	1
ENSMUST00000010698	ENSMUSG00000010554	Mettl16	transcript	0.0171987	0.0316763	-0.881109	0.632082	1
ENSMUST00000010736	ENSMUSG00000010592	Dazl	transcript	1.16149	1.19203	-0.0374388	0.945642	1
ENSMUST00000010745	ENSMUSG00000010601	Apol7a	transcript	0	0	NA	1	1
ENSMUST00000010753	ENSMUSG00000010609	Psen2	transcript	0.00455467	0.0145083	-1.67146	0.742475	1
ENSMUST00000010795	ENSMUSG00000010651	Acaa1b	transcript	0.747852	0.728327	0.0381658	0.993012	1
ENSMUST00000010804	ENSMUSG00000010660	Plcd1	transcript	3.17341	3.05948	0.0527472	0.945683	1
ENSMUST00000010807	ENSMUSG00000010663	Fads1	transcript	55.8726	51.5444	0.116325	0.783386	1
ENSMUST00000010899	ENSMUSG00000010755	Cars	transcript	2.13359	2.07931	0.0371794	0.966179	1
ENSMUST00000010904	ENSMUSG00000010760	Phlda2	transcript	0.014321	0	Inf	0.62224	1
ENSMUST00000010940	ENSMUSG00000010796	Asz1	transcript	0	0	NA	1	1
ENSMUST00000010941	ENSMUSG00000010797	Wnt2	transcript	1.94266	2.01602	-0.0534831	0.924493	1
ENSMUST00000010969	ENSMUSG00000010825	Grid2ip	transcript	1.20723	0.82417	0.550689	0.674212	1
ENSMUST00000010974	ENSMUSG00000010830	Kdelr3	transcript	0.203896	0.175998	0.212274	0.805635	1
ENSMUST00000010985	ENSMUSG00000010841	1700006E09Rik	transcript	0	0	NA	1	1
ENSMUST00000011029	ENSMUSG00000027679	Dnajc19	transcript	1.90166	1.41171	0.429823	0.613234	1
ENSMUST00000011055	ENSMUSG00000010911	Apip	transcript	4.9206	4.59752	0.0979796	0.896105	1
ENSMUST00000011058	ENSMUSG00000010914	Pdhx	transcript	14.8073	15.2993	-0.0471529	0.896451	1
ENSMUST00000011152	ENSMUSG00000011008	Mcoln2	transcript	0.00500467	0.017675	-1.82036	0.340114	1
ENSMUST00000011178	ENSMUSG00000011034	Slc5a1	transcript	0.0155577	0.008328	0.901584	0.737344	1
ENSMUST00000011262	ENSMUSG00000011118	Panx3	transcript	0.012916	0	Inf	0.234327	1
ENSMUST00000011285	ENSMUSG00000042826	Fgf11	transcript	0.496544	0.53294	-0.102052	0.926889	1
ENSMUST00000011298	ENSMUSG00000011154	1700026D08Rik	transcript	0.231905	0.108185	1.10003	0.569219	1
ENSMUST00000011302	ENSMUSG00000011158	Brf1	transcript	10.744	11.0655	-0.0425382	0.90646	1
ENSMUST00000011315	ENSMUSG00000011171	Vipr2	transcript	1.00244	0.92035	0.12326	0.872501	1
ENSMUST00000011391	ENSMUSG00000047257	Prss45	transcript	0.0631583	0.116081	-0.878091	0.596303	1
ENSMUST00000011398	ENSMUSG00000011254	Thg1l	transcript	2.39886	2.28768	0.0684618	0.929892	1
ENSMUST00000011400	ENSMUSG00000011256	Adam19	transcript	3.83703	4.2751	-0.155968	0.717627	1
ENSMUST00000011407	ENSMUSG00000011263	Exoc3l2	transcript	0	0	NA	1	1
ENSMUST00000011445	ENSMUSG00000031495	Cd209d	transcript	0	0.046988	#NAME?	0.0332504	1
ENSMUST00000011450	ENSMUSG00000011306	Sugp1	transcript	14.1751	14.7217	-0.0545855	0.881835	1
ENSMUST00000011492	ENSMUSG00000027710	Acad9	transcript	8.5092	8.92399	-0.0686659	0.858318	1
ENSMUST00000011493	ENSMUSG00000011349	Dmrtc2	transcript	0.00794933	0.006083	0.386051	1	1
ENSMUST00000011526	ENSMUSG00000011382	Dhdh	transcript	3.34015	3.99557	-0.258489	0.603024	1
ENSMUST00000011607	ENSMUSG00000011463	Cpb1	transcript	0.0197213	0.0303683	-0.622811	0.739142	1
ENSMUST00000011623	ENSMUSG00000002668	Dennd1c	transcript	0.257187	0.21329	0.270001	0.778757	1
ENSMUST00000011733	ENSMUSG00000011589	Fsd1	transcript	15.2713	15.5024	-0.0216665	0.943102	1
ENSMUST00000011776	ENSMUSG00000011632	Pinlyp	transcript	0	0.011386	#NAME?	0.633058	1
ENSMUST00000011877	ENSMUSG00000020315	Sptbn1	transcript	171.713	176.784	-0.0419862	0.882621	1
ENSMUST00000011895	ENSMUSG00000011751	Sptbn4	transcript	13.2447	13.6063	-0.0388614	0.899425	1
ENSMUST00000011896	ENSMUSG00000011752	Pgam1	transcript	164.986	172.612	-0.0651915	0.841242	1
ENSMUST00000011934	ENSMUSG00000051747	Ttn	transcript	0	0	NA	1	1
ENSMUST00000011981	ENSMUSG00000011837	Snapc2	transcript	12.5041	12.9928	-0.0553106	0.889698	1
ENSMUST00000012028	ENSMUSG00000011884	Gltp	transcript	11.6783	11.8814	-0.0248709	0.938497	1
ENSMUST00000012104	ENSMUSG00000011960	Ccnt1	transcript	0.313755	0.311787	0.00908075	1	1
ENSMUST00000012152	ENSMUSG00000003166	Dgcr2	transcript	5.56955	5.10192	0.126521	0.859865	1
ENSMUST00000012161	ENSMUSG00000012017	Scarf2	transcript	1.00448	0.871828	0.204333	0.773653	1
ENSMUST00000012186	ENSMUSG00000012042	4930579F01Rik	transcript	0.00483933	0	Inf	0.622211	1
ENSMUST00000012259	ENSMUSG00000012114	Med15	transcript	5.23963	5.14914	0.0251347	0.974916	1
ENSMUST00000012262	ENSMUSG00000012117	Dhdds	transcript	8.3921	9.67073	-0.204593	0.639405	1
ENSMUST00000012279	ENSMUSG00000022738	Gsc2	transcript	0	0.053161	#NAME?	0.0208533	0.797166
ENSMUST00000012281	ENSMUSG00000032179	Bmp5	transcript	0.577887	0.548078	0.0764062	0.922755	1
ENSMUST00000012314	ENSMUSG00000021510	A530054K11Rik	transcript	4.8198	4.39588	0.132821	0.800404	1
ENSMUST00000012331	ENSMUSG00000012187	Mogat1	transcript	0.0209887	0	Inf	0.3542	1
ENSMUST00000012348	ENSMUSG00000040562	Gstm2	transcript	0.898799	0.949975	-0.079891	0.929711	1
ENSMUST00000012355	ENSMUSG00000012211	Tex22	transcript	0.218302	0.230276	-0.0770387	0.947655	1
ENSMUST00000012426	ENSMUSG00000012282	Wnt8a	transcript	0	0	NA	1	1
ENSMUST00000012440	ENSMUSG00000012296	Tjap1	transcript	1.26955	1.3527	-0.09153	0.929756	1
ENSMUST00000012540	ENSMUSG00000012396	Nanog	transcript	0.00729067	0.009181	-0.332601	1	1
ENSMUST00000012566	ENSMUSG00000012422	Tmem167	transcript	0.804892	0.763746	0.0757035	0.939851	1
ENSMUST00000012580	ENSMUSG00000027615	Hps3	transcript	2.99764	2.70427	0.148585	0.818188	1
ENSMUST00000012587	ENSMUSG00000012443	Kif11	transcript	0.402418	0.412505	-0.0357156	0.956804	1
ENSMUST00000012612	ENSMUSG00000041164	Zmiz2	transcript	4.16402	3.56158	0.225463	0.681289	1
ENSMUST00000012627	ENSMUSG00000012483	Rpa3	transcript	5.48888	5.78737	-0.0763986	0.89978	1
ENSMUST00000012664	ENSMUSG00000012520	Phox2b	transcript	0	0	NA	1	1
ENSMUST00000012679	ENSMUSG00000012535	Tnpo3	transcript	17.2165	15.1795	0.181669	0.685175	1
ENSMUST00000012725	ENSMUSG00000030446	Zfp273	transcript	0.940796	0.492572	0.933548	0.561986	1
ENSMUST00000012734	ENSMUSG00000029131	Dnajb6	transcript	0.540408	1.37583	-1.34818	0.10094	1
ENSMUST00000012796	ENSMUSG00000012640	Zfp715	transcript	0.146657	0.134264	0.127374	0.948805	1
ENSMUST00000012798	ENSMUSG00000039013	Siglecf	transcript	0	0	NA	1	1
ENSMUST00000012847	ENSMUSG00000031494	Cd209a	transcript	0.360049	0.362713	-0.0106379	1	1
ENSMUST00000012849	ENSMUSG00000012705	Retn	transcript	0.149772	0.112426	0.413788	0.807736	1
ENSMUST00000012873	ENSMUSG00000058093	AA987161	transcript	3.77869	3.63922	0.0542575	0.932255	1
ENSMUST00000012921	ENSMUSG00000012777	Acpt	transcript	0	0	NA	1	1
ENSMUST00000013130	ENSMUSG00000020954	Strn3	transcript	14.261	11.6496	0.291793	0.51127	1
ENSMUST00000013220	ENSMUSG00000013076	Amotl1	transcript	5.11066	7.65514	-0.582921	0.355774	1
ENSMUST00000013227	ENSMUSG00000013083	2200002J24Rik	transcript	0	0.029674	#NAME?	0.633039	1
ENSMUST00000013235	ENSMUSG00000013091	Tmem190	transcript	0	0.0126323	#NAME?	0.628009	1
ENSMUST00000013262	ENSMUSG00000020472	Zkscan17	transcript	2.33917	2.36808	-0.0177205	0.960515	1
ENSMUST00000013294	ENSMUSG00000013150	Gfod2	transcript	3.68854	4.00128	-0.117411	0.793767	1
ENSMUST00000013299	ENSMUSG00000013155	Enkd1	transcript	2.73036	2.86482	-0.0693508	0.905647	1
ENSMUST00000013302	ENSMUSG00000013158	4933405L10Rik	transcript	0.049515	0.0336403	0.557674	0.736921	1
ENSMUST00000013304	ENSMUSG00000013160	Atp6v0d1	transcript	95.32	97.0223	-0.0255379	0.923899	1
ENSMUST00000013338	ENSMUSG00000064145	Arih2	transcript	10.1972	10.7205	-0.0721982	0.850674	1
ENSMUST00000013455	ENSMUSG00000053054	Adh6a	transcript	0	0	NA	1	1
ENSMUST00000013458	ENSMUSG00000037797	Adh4	transcript	0	0	NA	1	1
ENSMUST00000013497	ENSMUSG00000013353	4931406B18Rik	transcript	0	0.00334833	#NAME?	0.467161	1
ENSMUST00000013559	ENSMUSG00000013415	Igf2bp1	transcript	0.00287967	0.005185	-0.848442	0.73447	1
ENSMUST00000013633	ENSMUSG00000008090	Fgfrl1	transcript	3.9138	3.79598	0.0440978	0.959721	1
ENSMUST00000013667	ENSMUSG00000013523	Bcas1	transcript	3.19851	3.13472	0.0290622	0.969029	1
ENSMUST00000013693	ENSMUSG00000029213	Commd8	transcript	9.8476	10.1959	-0.05015	0.889904	1
ENSMUST00000013706	ENSMUSG00000013562	4833413E03Rik	transcript	0	0	NA	1	1
ENSMUST00000013737	ENSMUSG00000013593	Ndufs2	transcript	79.1557	79.8107	-0.01189	0.954755	1
ENSMUST00000013755	ENSMUSG00000013611	Snx31	transcript	0.11867	0.0872763	0.443289	0.726085	1
ENSMUST00000013759	ENSMUSG00000008200	Fnbp4	transcript	6.96414	6.91674	0.00985326	0.995999	1
ENSMUST00000013766	ENSMUSG00000013622	Atraid	transcript	18.9777	19.2016	-0.0169146	0.959348	1
ENSMUST00000013771	ENSMUSG00000062077	Trim54	transcript	0.139244	0.140069	-0.00851564	1	1
ENSMUST00000013773	ENSMUSG00000013629	Cad	transcript	2.31868	2.92074	-0.333031	0.486916	1
ENSMUST00000013787	ENSMUSG00000013643	Lypd8	transcript	0	0	NA	1	1
ENSMUST00000013797	ENSMUSG00000013653	1810065E05Rik	transcript	0	0	NA	1	1
ENSMUST00000013807	ENSMUSG00000013663	Pten	transcript	46.713	48.3144	-0.0486287	0.871119	1
ENSMUST00000013842	ENSMUSG00000013698	Pea15a	transcript	119.728	124.174	-0.0526086	0.864645	1
ENSMUST00000013845	ENSMUSG00000013701	Timm23	transcript	18.6509	15.4817	0.268681	0.593484	1
ENSMUST00000013851	ENSMUSG00000013707	Tnfaip8l2	transcript	0.879614	0.780127	0.173161	0.842834	1
ENSMUST00000013882	ENSMUSG00000005362	Crbn	transcript	23.0676	22.1082	0.0612824	0.909811	1
ENSMUST00000013886	ENSMUSG00000019254	Ppp1r12c	transcript	27.3848	29.7294	-0.118513	0.747515	1
ENSMUST00000013910	ENSMUSG00000013766	Ly6g6e	transcript	1.02512	0.925929	0.146818	0.862447	1
ENSMUST00000013931	ENSMUSG00000013787	Ehmt2	transcript	27.5442	15.8346	0.79867	0.169453	1
ENSMUST00000013949	ENSMUSG00000032000	Birc3	transcript	0.611408	0.593313	0.0433412	0.971495	1
ENSMUST00000013966	ENSMUSG00000013822	Elof1	transcript	22.6073	26.0257	-0.203151	0.655164	1
ENSMUST00000013970	ENSMUSG00000025417	Pip4k2c	transcript	32.18	35.822	-0.15468	0.672747	1
ENSMUST00000013995	ENSMUSG00000028125	Abca4	transcript	0.76449	0.645625	0.243802	0.724922	1
ENSMUST00000014022	ENSMUSG00000013878	Rnf170	transcript	6.33826	6.52901	-0.0427761	0.906517	1
ENSMUST00000014058	ENSMUSG00000030693	Klk10	transcript	0.0334063	0.0658283	-0.978587	0.630749	1
ENSMUST00000014063	ENSMUSG00000044430	Klk12	transcript	0	0	NA	1	1
ENSMUST00000014065	ENSMUSG00000013921	Clip3	transcript	104.375	111.703	-0.0978983	0.767632	1
ENSMUST00000014072	ENSMUSG00000013928	Thap8	transcript	0	0	NA	1	1
ENSMUST00000014080	ENSMUSG00000013936	Myl2	transcript	0.233651	0.277462	-0.247935	0.8089	1
ENSMUST00000014089	ENSMUSG00000029510	Gpc2	transcript	0	0	NA	1	1
ENSMUST00000014118	ENSMUSG00000013974	Mcemp1	transcript	0.0469027	0.0340147	0.463513	0.820082	1
ENSMUST00000014174	ENSMUSG00000014030	Pax5	transcript	0.025956	0.0351513	-0.437511	0.900743	1
ENSMUST00000014218	ENSMUSG00000014074	Rnf168	transcript	10.2946	10.2008	0.0132073	0.998783	1
ENSMUST00000014220	ENSMUSG00000014075	Tctex1d2	transcript	6.30807	6.29811	0.00227964	0.993661	1
ENSMUST00000014221	ENSMUSG00000014077	Chp1	transcript	45.3874	43.4878	0.0616814	0.899313	1
ENSMUST00000014248	ENSMUSG00000014104	Sval2	transcript	0	0	NA	1	1
ENSMUST00000014263	ENSMUSG00000054545	Ugt1a6a	transcript	0.154294	0.191292	-0.310092	0.818337	1
ENSMUST00000014290	ENSMUSG00000026786	Apbb1ip	transcript	1.59829	1.13042	0.499674	0.46509	1
ENSMUST00000014321	ENSMUSG00000014177	Tvp23b	transcript	10.9648	11.1502	-0.0241911	0.940901	1
ENSMUST00000014339	ENSMUSG00000014195	Dnajc7	transcript	38.3383	38.132	0.0077863	0.990581	1
ENSMUST00000014370	ENSMUSG00000014226	Cacybp	transcript	29.7784	29.8052	-0.00129851	0.973764	1
ENSMUST00000014389	ENSMUSG00000014245	Pigl	transcript	2.70189	2.68023	0.0116125	1	1
ENSMUST00000014421	ENSMUSG00000055204	Ankrd17	transcript	15.9721	15.7815	0.0173182	0.989007	1
ENSMUST00000014438	ENSMUSG00000014294	Ndufa2	transcript	53.4592	53.4743	-0.000408127	0.976102	1
ENSMUST00000014445	ENSMUSG00000014301	Pam16	transcript	20.7908	22.8582	-0.136765	0.776443	1
ENSMUST00000014447	ENSMUSG00000014303	Glis2	transcript	3.19799	2.99797	0.0931828	0.877852	1
ENSMUST00000014457	ENSMUSG00000014313	Cox6c	transcript	162.372	177.486	-0.128402	0.730667	1
ENSMUST00000014473	ENSMUSG00000014329	Bicc1	transcript	0.959356	0.714369	0.425398	0.580336	1
ENSMUST00000014476	ENSMUSG00000089727	Klra8	transcript	0	0	NA	1	1
ENSMUST00000014499	ENSMUSG00000014355	Anapc1	transcript	14.1894	13.4798	0.0740139	0.872359	1
ENSMUST00000014505	ENSMUSG00000014361	Mertk	transcript	12.2789	14.1889	-0.208578	0.601799	1
ENSMUST00000014545	ENSMUSG00000030851	Ldhc	transcript	0	0	NA	1	1
ENSMUST00000014546	ENSMUSG00000014402	Tsg101	transcript	17.9648	18.0486	-0.00671924	0.966414	1
ENSMUST00000014562	ENSMUSG00000014418	Hps5	transcript	1.39542	0.987053	0.499495	0.555499	1
ENSMUST00000014578	ENSMUSG00000059481	Plg	transcript	0.00745033	0.016173	-1.11821	0.695245	1
ENSMUST00000014597	ENSMUSG00000014453	Blk	transcript	0	0	NA	1	1
ENSMUST00000014614	ENSMUSG00000014470	Rnf166	transcript	11.0384	12.3298	-0.159621	0.72318	1
ENSMUST00000014640	ENSMUSG00000014496	Ankrd28	transcript	14.1118	13.1696	0.0996991	0.83284	1
ENSMUST00000014642	ENSMUSG00000014498	Ankrd52	transcript	14.5994	14.7809	-0.017822	0.942031	1
ENSMUST00000014647	ENSMUSG00000014503	Pkd2l2	transcript	0.370852	0.286076	0.374447	0.656431	1
ENSMUST00000014673	ENSMUSG00000014529	Tmbim7	transcript	0	0.0141333	#NAME?	0.256072	1
ENSMUST00000014683	ENSMUSG00000030173	Klra5	transcript	0	0	NA	1	1
ENSMUST00000014684	ENSMUSG00000061613	U2af1	transcript	10.2633	9.50801	0.110285	0.860453	1
ENSMUST00000014686	ENSMUSG00000014542	Clec4f	transcript	0	0	NA	1	1
ENSMUST00000014687	ENSMUSG00000014543	Klra17	transcript	0	0	NA	1	1
ENSMUST00000014691	ENSMUSG00000014547	Wdfy2	transcript	5.66796	5.22917	0.116248	0.845495	1
ENSMUST00000014694	ENSMUSG00000014550	Zfyve20	transcript	13.2843	13.1255	0.0173534	0.989047	1
ENSMUST00000014698	ENSMUSG00000014554	Dguok	transcript	5.20302	5.71697	-0.135902	0.813203	1
ENSMUST00000014743	ENSMUSG00000014599	Csf1	transcript	4.15791	3.53037	0.236039	0.669672	1
ENSMUST00000014747	ENSMUSG00000014603	Alx3	transcript	0.494412	0.298909	0.72601	0.481432	1
ENSMUST00000014750	ENSMUSG00000014606	Slc25a11	transcript	36.796	35.8259	0.038545	0.948425	1
ENSMUST00000014753	ENSMUSG00000014609	Chrne	transcript	0.0121927	0.033337	-1.45111	0.486897	1
ENSMUST00000014777	ENSMUSG00000052560	Cpne8	transcript	2.76359	2.26592	0.286447	0.707471	1
ENSMUST00000014812	ENSMUSG00000014668	Chfr	transcript	2.60941	3.13687	-0.265605	0.628572	1
ENSMUST00000014830	ENSMUSG00000014686	Ceacam16	transcript	0.060182	0.00413767	3.86244	0.149451	1
ENSMUST00000014848	ENSMUSG00000014704	Hoxa2	transcript	0.0153633	0	Inf	0.35422	1
ENSMUST00000014891	ENSMUSG00000014747	Ankrd53	transcript	0.0396463	0.005663	2.80755	0.123943	1
ENSMUST00000014892	ENSMUSG00000014748	Tex261	transcript	10.4743	11.1498	-0.0901604	0.820533	1
ENSMUST00000014911	ENSMUSG00000014767	Tbp	transcript	0.494382	0.388703	0.346958	0.702814	1
ENSMUST00000014913	ENSMUSG00000014769	Psmb1	transcript	72.3642	75.9995	-0.0707133	0.841242	1
ENSMUST00000014917	ENSMUSG00000014773	Dll1	transcript	1.69273	1.77637	-0.0695763	0.897679	1
ENSMUST00000014920	ENSMUSG00000014776	Nol3	transcript	4.59933	4.86967	-0.0824018	0.85153	1
ENSMUST00000014922	ENSMUSG00000014778	Fhod1	transcript	0.880036	0.768623	0.195286	0.784253	1
ENSMUST00000014927	ENSMUSG00000014782	Plekhg4	transcript	0.189938	0.107243	0.824648	0.503258	1
ENSMUST00000014957	ENSMUSG00000014813	Stc1	transcript	0.96613	0.939132	0.0408889	0.970389	1
ENSMUST00000014981	ENSMUSG00000014837	4931428F04Rik	transcript	2.34045	1.29765	0.850882	0.191099	1
ENSMUST00000014990	ENSMUSG00000014846	Tppp3	transcript	18.2144	16.7598	0.120073	0.840522	1
ENSMUST00000014996	ENSMUSG00000014852	Adamts13	transcript	0.00312433	0.0107503	-1.78276	0.573613	1
ENSMUST00000015000	ENSMUSG00000014856	Tmem208	transcript	11.4421	12.5032	-0.127945	0.805607	1
ENSMUST00000015003	ENSMUSG00000014859	E2f4	transcript	10.2816	10.422	-0.0195734	0.946207	1
ENSMUST00000015011	ENSMUSG00000014867	Surf4	transcript	18.1104	18.6102	-0.0392786	0.904452	1
ENSMUST00000015017	ENSMUSG00000014873	Surf2	transcript	10.0364	9.30603	0.10901	0.854731	1
ENSMUST00000015049	ENSMUSG00000014905	Dnajb9	transcript	24.2697	24.7546	-0.0285459	0.925433	1
ENSMUST00000015100	ENSMUSG00000014956	Ppp1cb	transcript	68.9716	66.2619	0.0578229	0.903366	1
ENSMUST00000015107	ENSMUSG00000020694	Tlk2	transcript	0.723985	0.719779	0.00840713	1	1
ENSMUST00000015124	ENSMUSG00000014980	Tsen15	transcript	7.90199	7.02542	0.169631	0.782451	1
ENSMUST00000015137	ENSMUSG00000029674	Limk1	transcript	12.2908	10.8766	0.176343	0.721907	1
ENSMUST00000015138	ENSMUSG00000029675	Eln	transcript	2.00761	2.21533	-0.142044	0.80557	1
ENSMUST00000015146	ENSMUSG00000015002	Efr3a	transcript	35.7918	31.1677	0.199581	0.625114	1
ENSMUST00000015157	ENSMUSG00000015013	Trappc2l	transcript	27.3575	33.1037	-0.275057	0.549749	1
ENSMUST00000015160	ENSMUSG00000015016	Acsf3	transcript	6.27573	6.5023	-0.0511683	0.90641	1
ENSMUST00000015171	ENSMUSG00000015027	Galns	transcript	1.83831	1.71861	0.097133	0.895498	1
ENSMUST00000015197	ENSMUSG00000015053	Gata2	transcript	1.186	1.26563	-0.0937454	0.86942	1
ENSMUST00000015227	ENSMUSG00000015083	C8g	transcript	0.0322083	0	Inf	0.281696	1
ENSMUST00000015234	ENSMUSG00000015090	Ptgds	transcript	94.7312	48.5041	0.965733	0.271541	1
ENSMUST00000015236	ENSMUSG00000015092	Edf1	transcript	42.8443	37.0749	0.208661	0.675558	1
ENSMUST00000015239	ENSMUSG00000015095	Fbxw5	transcript	19.1741	20.1432	-0.0711299	0.85094	1
ENSMUST00000015256	ENSMUSG00000015112	Slc25a13	transcript	0.817221	0.00137733	9.2127	2.12e-09	4.77e-06
ENSMUST00000015267	ENSMUSG00000024171	Prss28	transcript	0	0	NA	1	1
ENSMUST00000015271	ENSMUSG00000015127	Unkl	transcript	4.18188	3.41143	0.293776	0.794226	1
ENSMUST00000015277	ENSMUSG00000015133	Lrrk1	transcript	1.00644	1.04127	-0.0490747	0.925187	1
ENSMUST00000015278	ENSMUSG00000015134	Aldh1a3	transcript	0.239201	0.208834	0.195867	0.827338	1
ENSMUST00000015333	ENSMUSG00000015189	Casd1	transcript	17.4482	18.6938	-0.0994756	0.787228	1
ENSMUST00000015346	ENSMUSG00000015202	Cnksr3	transcript	1.71664	1.95945	-0.190863	0.744107	1
ENSMUST00000015358	ENSMUSG00000015214	Mtmr1	transcript	8.75112	8.64025	0.0183947	0.987896	1
ENSMUST00000015361	ENSMUSG00000015217	Hmgb3	transcript	0	0	NA	1	1
ENSMUST00000015368	ENSMUSG00000066097	Cyp2j11	transcript	0	0	NA	1	1
ENSMUST00000015391	ENSMUSG00000015247	Nipsnap3b	transcript	5.49422	4.8277	0.186581	0.758811	1
ENSMUST00000015394	ENSMUSG00000050578	Mmp13	transcript	0.00405267	0.0100427	-1.3092	0.736896	1
ENSMUST00000015427	ENSMUSG00000031399	Fam3a	transcript	0	0	NA	1	1
ENSMUST00000015433	ENSMUSG00000015289	Lage3	transcript	4.39942	4.30015	0.0329237	0.984472	1
ENSMUST00000015435	ENSMUSG00000015291	Gdi1	transcript	139.075	146.888	-0.078856	0.809711	1
ENSMUST00000015449	ENSMUSG00000015305	Sash1	transcript	17.0961	16.6777	0.0357434	0.951161	1
ENSMUST00000015456	ENSMUSG00000015312	Gadd45b	transcript	5.46304	6.24123	-0.192127	0.731863	1
ENSMUST00000015460	ENSMUSG00000015316	Slamf1	transcript	0.0503473	0.0663597	-0.398391	0.739071	1
ENSMUST00000015467	ENSMUSG00000052310	Slc39a1	transcript	15.3742	15.1272	0.0233635	0.977951	1
ENSMUST00000015481	ENSMUSG00000015337	Endog	transcript	9.07266	10.4762	-0.207516	0.687614	1
ENSMUST00000015484	ENSMUSG00000015340	Cybb	transcript	0.293618	0.199007	0.561121	0.487386	1
ENSMUST00000015486	ENSMUSG00000015342	Xk	transcript	5.69396	5.93263	-0.0592385	0.876563	1
ENSMUST00000015498	ENSMUSG00000015354	Pcolce2	transcript	1.36889	1.39001	-0.0220961	0.955369	1
ENSMUST00000015499	ENSMUSG00000015355	Cd48	transcript	0.0899493	0.0304397	1.56316	0.548162	1
ENSMUST00000015501	ENSMUSG00000015357	Clpx	transcript	9.17193	9.42353	-0.0390413	0.912393	1
ENSMUST00000015509	ENSMUSG00000015365	Mov10l1	transcript	0	0	NA	1	1
ENSMUST00000015511	ENSMUSG00000030123	Plxnd1	transcript	13.1361	14.8924	-0.18103	0.639406	1
ENSMUST00000015540	ENSMUSG00000015396	Cd83	transcript	5.67737	5.64326	0.00869412	0.994616	1
ENSMUST00000015545	ENSMUSG00000015401	Tmem27	transcript	0	0	NA	1	1
ENSMUST00000015576	ENSMUSG00000022226	Mcpt2	transcript	0	0	NA	1	1
ENSMUST00000015578	ENSMUSG00000040284	Gzmg	transcript	0	0	NA	1	1
ENSMUST00000015581	ENSMUSG00000015437	Gzmb	transcript	0.00910633	0	Inf	0.453418	1
ENSMUST00000015583	ENSMUSG00000040314	Ctsg	transcript	0.037023	0	Inf	0.143337	1
ENSMUST00000015585	ENSMUSG00000079186	Gzmc	transcript	0	0	NA	1	1
ENSMUST00000015587	ENSMUSG00000015443	Gzmn	transcript	0	0	NA	1	1
ENSMUST00000015594	ENSMUSG00000022157	Mcpt8	transcript	0	0.0155477	#NAME?	0.633024	1
ENSMUST00000015596	ENSMUSG00000015452	Ager	transcript	0.0952587	0.0440013	1.1143	0.366759	1
ENSMUST00000015605	ENSMUSG00000015461	Atf6b	transcript	18.3271	18.1687	0.0125265	0.99537	1
ENSMUST00000015611	ENSMUSG00000015467	Egfl8	transcript	0.719673	0.594441	0.275808	0.756743	1
ENSMUST00000015612	ENSMUSG00000015468	Notch4	transcript	1.57323	1.71333	-0.123075	0.803679	1
ENSMUST00000015620	ENSMUSG00000015476	Prrt1	transcript	37.0783	32.512	0.189603	0.675053	1
ENSMUST00000015622	ENSMUSG00000015478	Rnf5	transcript	21.08	22.0474	-0.0647325	0.874966	1
ENSMUST00000015628	ENSMUSG00000015484	Fam163a	transcript	2.95641	3.04352	-0.0418953	0.926031	1
ENSMUST00000015645	ENSMUSG00000015501	Hivep2	transcript	34.6347	37.6505	-0.12045	0.729927	1
ENSMUST00000015663	ENSMUSG00000015519	2310057J18Rik	transcript	0	0	NA	1	1
ENSMUST00000015664	ENSMUSG00000028111	Ctsk	transcript	1.31123	1.0799	0.280019	0.720664	1
ENSMUST00000015666	ENSMUSG00000015522	Arnt	transcript	0.00569567	0.006179	-0.117509	1	1
ENSMUST00000015667	ENSMUSG00000038642	Ctss	transcript	16.025	10.0077	0.679213	0.291972	1
ENSMUST00000015680	ENSMUSG00000015536	Mocs2	transcript	0.006993	3.86779	-9.11138	5.58e-06	0.00298101
ENSMUST00000015712	ENSMUSG00000015568	Lpl	transcript	9.07793	9.31482	-0.0371647	0.914796	1
ENSMUST00000015719	ENSMUSG00000015575	Atp6v0e	transcript	12.0721	12.8696	-0.0922905	0.855697	1
ENSMUST00000015723	ENSMUSG00000015579	Nkx2-5	transcript	0	0	NA	1	1
ENSMUST00000015725	ENSMUSG00000024191	Bnip1	transcript	8.40457	8.75944	-0.0596655	0.899376	1
ENSMUST00000015749	ENSMUSG00000015605	Srf	transcript	13.2998	14.2172	-0.0962377	0.797344	1
ENSMUST00000015771	ENSMUSG00000015627	Gata5	transcript	0	0	NA	1	1
ENSMUST00000015791	ENSMUSG00000015647	Lama5	transcript	1.04535	1.20089	-0.200112	0.681112	1
ENSMUST00000015796	ENSMUSG00000015652	Steap1	transcript	0.411432	0.227819	0.852764	0.509254	1
ENSMUST00000015797	ENSMUSG00000015653	Steap2	transcript	0.553298	0.436986	0.340472	0.652923	1
ENSMUST00000015800	ENSMUSG00000015656	Hspa8	transcript	591.52	528.52	0.162469	0.691168	1
ENSMUST00000015812	ENSMUSG00000015668	Pdzd11	transcript	0.552636	0.572895	-0.0519404	0.946135	1
ENSMUST00000015816	ENSMUSG00000015672	Mrpl32	transcript	12.8231	12.2653	0.064167	0.926483	1
ENSMUST00000015829	ENSMUSG00000030861	Acadsb	transcript	16.6223	16.0688	0.0488585	0.931688	1
ENSMUST00000015841	ENSMUSG00000015697	Setdb1	transcript	1.40154	0.987382	0.505332	0.437288	1
ENSMUST00000015846	ENSMUSG00000015702	Anxa9	transcript	0.013174	0.0108743	0.276766	1	1
ENSMUST00000015855	ENSMUSG00000015711	Prune	transcript	8.34714	8.47819	-0.0224735	0.941854	1
ENSMUST00000015858	ENSMUSG00000015714	Cers2	transcript	12.9761	12.0269	0.109591	0.833512	1
ENSMUST00000015866	ENSMUSG00000015721	Nlrp5	transcript	0	0	NA	1	1
ENSMUST00000015877	ENSMUSG00000015733	Capza2	transcript	73.1691	70.3449	0.0567893	0.907941	1
ENSMUST00000015889	ENSMUSG00000015745	Plekho1	transcript	7.66965	8.39886	-0.131033	0.790068	1
ENSMUST00000015891	ENSMUSG00000015747	Vps45	transcript	12.7161	12.8373	-0.0136857	0.955051	1
ENSMUST00000015892	ENSMUSG00000015748	Prpf3	transcript	2.91565	3.9765	-0.447683	0.444074	1
ENSMUST00000015893	ENSMUSG00000015749	Anp32e	transcript	12.3428	5.26649	1.22875	0.0554818	1
ENSMUST00000015894	ENSMUSG00000015750	Aph1a	transcript	8.93996	9.6894	-0.11614	0.785475	1
ENSMUST00000015901	ENSMUSG00000015757	Ppil4	transcript	10.6041	9.19662	0.205452	0.666917	1
ENSMUST00000015903	ENSMUSG00000015759	Cnih1	transcript	26.6962	25.7281	0.053291	0.923651	1
ENSMUST00000015920	ENSMUSG00000015776	Med22	transcript	10.4644	7.69474	0.443539	0.472166	1
ENSMUST00000015934	ENSMUSG00000015790	Surf1	transcript	8.54069	9.19661	-0.10675	0.832491	1
ENSMUST00000015941	ENSMUSG00000042118	Bhmt2	transcript	0.0421523	0.0597913	-0.504324	0.647493	1
ENSMUST00000015950	ENSMUSG00000015806	Qdpr	transcript	56.2981	58.3925	-0.0526972	0.870911	1
ENSMUST00000015981	ENSMUSG00000015837	Sqstm1	transcript	19.9203	18.9163	0.0746107	0.885461	1
ENSMUST00000015987	ENSMUSG00000015843	Rxrg	transcript	6.36411	7.06731	-0.151202	0.750902	1
ENSMUST00000015994	ENSMUSG00000015850	Adamtsl4	transcript	1.68066	2.21249	-0.396645	0.558537	1
ENSMUST00000015998	ENSMUSG00000015854	Cd5l	transcript	0.00606733	0	Inf	0.626439	1
ENSMUST00000016023	ENSMUSG00000015879	Fam184b	transcript	2.01474	1.91698	0.0717525	0.915539	1
ENSMUST00000016026	ENSMUSG00000015882	Lcorl	transcript	0.000792667	0.000736667	0.105702	1	1
ENSMUST00000016033	ENSMUSG00000015889	Lta4h	transcript	11.5482	11.6252	-0.00958783	0.96466	1
ENSMUST00000016034	ENSMUSG00000015890	Amdhd1	transcript	0.0270127	0.0227143	0.250033	1	1
ENSMUST00000016072	ENSMUSG00000027422	Rrbp1	transcript	6.61885	5.97036	0.148763	0.765548	1
ENSMUST00000016081	ENSMUSG00000015937	H2afy	transcript	21.2801	17.9016	0.249422	0.588219	1
ENSMUST00000016086	ENSMUSG00000015942	Gtf2ird2	transcript	4.13559	4.39127	-0.0865448	0.844154	1
ENSMUST00000016087	ENSMUSG00000015943	Bola1	transcript	2.30122	2.38849	-0.0537008	0.940688	1
ENSMUST00000016088	ENSMUSG00000015944	Gatsl2	transcript	24.2478	27.7178	-0.19296	0.595715	1
ENSMUST00000016094	ENSMUSG00000015950	Ncf1	transcript	0.249478	0.015835	3.97772	0.0381742	1
ENSMUST00000016105	ENSMUSG00000015961	Adss	transcript	22.3475	22.3936	-0.00297271	0.970172	1
ENSMUST00000016106	ENSMUSG00000015962	1700016C15Rik	transcript	0	0	NA	1	1
ENSMUST00000016110	ENSMUSG00000015966	Il17rb	transcript	0.361652	0.297515	0.281637	0.840494	1
ENSMUST00000016115	ENSMUSG00000015971	Actr8	transcript	17.2145	17.0759	0.0116594	0.998948	1
ENSMUST00000016124	ENSMUSG00000015980	Lrrc27	transcript	1.75611	1.8574	-0.080897	0.887617	1
ENSMUST00000016125	ENSMUSG00000015981	Stk32c	transcript	38.1697	41.2136	-0.110692	0.762955	1
ENSMUST00000016138	ENSMUSG00000015994	Fnta	transcript	19.3922	19.2893	0.00768087	0.992479	1
ENSMUST00000016143	ENSMUSG00000029636	Wasf3	transcript	32.2776	31.8317	0.0200678	0.982012	1
ENSMUST00000016144	ENSMUSG00000021759	Ppap2a	transcript	4.94465	4.44734	0.152925	0.81249	1
ENSMUST00000016168	ENSMUSG00000016024	Lbp	transcript	1.60606	1.26445	0.345022	0.676889	1
ENSMUST00000016172	ENSMUSG00000016028	Celsr1	transcript	1.429	1.44519	-0.0162512	0.957176	1
ENSMUST00000016231	ENSMUSG00000016087	Fli1	transcript	1.85967	1.8004	0.046729	0.952493	1
ENSMUST00000016279	ENSMUSG00000041132	N4bp2l1	transcript	7.5789	8.54002	-0.172252	0.71031	1
ENSMUST00000016294	ENSMUSG00000016150	Tenm1	transcript	2.06398	2.06572	-0.00121596	0.96987	1
ENSMUST00000016309	ENSMUSG00000006301	Tmbim1	transcript	1.70001	1.37741	0.303584	0.705035	1
ENSMUST00000016315	ENSMUSG00000026639	Lamb3	transcript	0	0	NA	1	1
ENSMUST00000016323	ENSMUSG00000016179	Camk1g	transcript	13.763	15.9363	-0.211519	0.616458	1
ENSMUST00000016338	ENSMUSG00000016194	Hsd11b1	transcript	2.95309	1.55865	0.92193	0.194735	1
ENSMUST00000016344	ENSMUSG00000016200	Syt14	transcript	1.54335	1.75932	-0.188948	0.773967	1
ENSMUST00000016383	ENSMUSG00000016239	Lonrf3	transcript	4.62822	6.09845	-0.397986	0.408005	1
ENSMUST00000016396	ENSMUSG00000016252	Atp5e	transcript	113.508	127.034	-0.162417	0.685071	1
ENSMUST00000016397	ENSMUSG00000016253	Nelfcd	transcript	0.031395	0.025109	0.32233	1	1
ENSMUST00000016399	ENSMUSG00000016255	Tubb1	transcript	0.0168943	0.0243203	-0.525624	0.736546	1
ENSMUST00000016400	ENSMUSG00000016256	Ctsz	transcript	18.9962	15.1594	0.325496	0.500092	1
ENSMUST00000016401	ENSMUSG00000016257	Slmo2	transcript	18.1146	16.9963	0.0919361	0.862331	1
ENSMUST00000016406	ENSMUSG00000016262	Sertad4	transcript	0.005892	0.005794	0.0241977	1	1
ENSMUST00000016427	ENSMUSG00000016283	H2-M2	transcript	0	0	NA	1	1
ENSMUST00000016452	ENSMUSG00000016308	Ube2a	transcript	16.643	15.9021	0.0656992	0.908076	1
ENSMUST00000016463	ENSMUSG00000016319	Slc25a5	transcript	114.683	113.057	0.0206041	0.980982	1
ENSMUST00000016471	ENSMUSG00000016327	Atp1b4	transcript	0	0	NA	1	1
ENSMUST00000016488	ENSMUSG00000016344	Ppdpf	transcript	7.92722	9.1407	-0.20549	0.700381	1
ENSMUST00000016491	ENSMUSG00000016346	Kcnq2	transcript	2.17042	2.44159	-0.169842	0.762037	1
ENSMUST00000016498	ENSMUSG00000027579	Srms	transcript	0.0910043	0.0729467	0.319093	0.773395	1
ENSMUST00000016511	ENSMUSG00000038751	Ptk6	transcript	0	0.00360367	#NAME?	0.467119	1
ENSMUST00000016530	ENSMUSG00000016386	Mpped2	transcript	0.271589	0.298344	-0.135552	0.933452	1
ENSMUST00000016553	ENSMUSG00000016409	Nkap	transcript	4.61725	4.70766	-0.027977	0.933585	1
ENSMUST00000016569	ENSMUSG00000034021	Pds5b	transcript	13.329	12.8211	0.0560434	0.915889	1
ENSMUST00000016571	ENSMUSG00000016427	Ndufa1	transcript	50.1268	47.9738	0.0633355	0.916831	1
ENSMUST00000016631	ENSMUSG00000016487	Ppfibp1	transcript	1.69601	1.29589	0.388199	0.524629	1
ENSMUST00000016638	ENSMUSG00000016494	Cd34	transcript	4.24127	4.86173	-0.196974	0.708499	1
ENSMUST00000016639	ENSMUSG00000016495	Plgrkt	transcript	0.117876	0.550124	-2.22248	0.181114	1
ENSMUST00000016640	ENSMUSG00000016496	Cd274	transcript	0.560238	0.535309	0.065668	0.946614	1
ENSMUST00000016654	ENSMUSG00000016510	Mtif3	transcript	0.168907	0.109232	0.628835	0.685279	1
ENSMUST00000016664	ENSMUSG00000016520	Lnx2	transcript	1.60078	1.78601	-0.157965	0.772746	1
ENSMUST00000016668	ENSMUSG00000016524	Il19	transcript	0	0	NA	1	1
ENSMUST00000016670	ENSMUSG00000016526	Dyrk3	transcript	3.89411	3.4632	0.169189	0.76518	1
ENSMUST00000016672	ENSMUSG00000016528	Mapkapk2	transcript	10.1226	10.2526	-0.0184122	0.950006	1
ENSMUST00000016673	ENSMUSG00000016529	Il10	transcript	0.035639	0	Inf	0.19418	1
ENSMUST00000016678	ENSMUSG00000016534	Lamp2	transcript	7.92929	5.50003	0.527752	0.349195	1
ENSMUST00000016680	ENSMUSG00000031446	Cul4a	transcript	16.402	16.6759	-0.0238878	0.932065	1
ENSMUST00000016681	ENSMUSG00000031095	Cul4b	transcript	15.1736	14.4851	0.0669935	0.896614	1
ENSMUST00000016696	ENSMUSG00000016552	Foxred2	transcript	2.81338	2.14632	0.39044	0.490974	1
ENSMUST00000016703	ENSMUSG00000016559	H3f3b	transcript	48.2442	49.4521	-0.0356772	0.9304	1
ENSMUST00000016768	ENSMUSG00000016624	Phf21b	transcript	0.261772	0.0290663	3.17089	0.0314613	1
ENSMUST00000016771	ENSMUSG00000022443	Myh9	transcript	19.7615	21.8372	-0.144099	0.685501	1
ENSMUST00000016781	ENSMUSG00000016637	Ift27	transcript	9.13392	9.06592	0.0107798	1	1
ENSMUST00000016897	ENSMUSG00000022442	Ttll1	transcript	12.9578	13.6997	-0.0803144	0.838355	1
ENSMUST00000016901	ENSMUSG00000016757	Ttll12	transcript	4.0864	4.50222	-0.139805	0.769881	1
ENSMUST00000016902	ENSMUSG00000016758	Bik	transcript	0	0.0543093	#NAME?	0.0743773	1
ENSMUST00000016907	ENSMUSG00000016763	Scube1	transcript	4.524	4.62277	-0.0311613	0.971045	1
ENSMUST00000016951	ENSMUSG00000051029	Serpinb1b	transcript	0.919399	0.6654	0.466469	0.591265	1
ENSMUST00000016977	ENSMUSG00000016833	Mrps18c	transcript	13.7965	13.6114	0.0194875	0.991027	1
ENSMUST00000017086	ENSMUSG00000016942	Tmprss6	transcript	0.261838	0.230072	0.186589	0.839198	1
ENSMUST00000017090	ENSMUSG00000016946	Kctd5	transcript	7.79063	8.05084	-0.0473991	0.904406	1
ENSMUST00000017126	ENSMUSG00000016982	Pom121l2	transcript	0.018533	0.00802167	1.20812	0.569275	1
ENSMUST00000017142	ENSMUSG00000016998	Svs4	transcript	0	0	NA	1	1
ENSMUST00000017144	ENSMUSG00000017000	Svs6	transcript	0	0	NA	1	1
ENSMUST00000017147	ENSMUSG00000017003	Svs3a	transcript	0	0	NA	1	1
ENSMUST00000017148	ENSMUSG00000017004	Svs5	transcript	0	0	NA	1	1
ENSMUST00000017151	ENSMUSG00000017007	Rbpjl	transcript	0.127145	0.18705	-0.556953	0.580764	1
ENSMUST00000017153	ENSMUSG00000017009	Sdc4	transcript	45.064	44.7802	0.00911512	0.995443	1
ENSMUST00000017188	ENSMUSG00000060147	Serpinb6a	transcript	3.74466	5.29295	-0.499238	0.567416	1
ENSMUST00000017193	ENSMUSG00000017049	Ccdc70	transcript	0	0	NA	1	1
ENSMUST00000017208	ENSMUSG00000017064	Prl5a1	transcript	0	0	NA	1	1
ENSMUST00000017255	ENSMUSG00000020913	Krt24	transcript	0	0.003729	#NAME?	0.626979	1
ENSMUST00000017270	ENSMUSG00000053654	Krt42	transcript	0	0	NA	1	1
ENSMUST00000017276	ENSMUSG00000017132	Cyth1	transcript	15.6801	15.6694	0.000977489	0.979885	1
ENSMUST00000017288	ENSMUSG00000017144	Rnd3	transcript	6.10961	6.353	-0.0563569	0.891325	1
ENSMUST00000017290	ENSMUSG00000017146	Brca1	transcript	0.46749	0.383587	0.285384	0.691397	1
ENSMUST00000017309	ENSMUSG00000017165	Gast	transcript	0.116441	0.0406357	1.51878	0.493204	1
ENSMUST00000017316	ENSMUSG00000019326	Aoc3	transcript	0	0.00364	#NAME?	0.626945	1
ENSMUST00000017332	ENSMUSG00000017188	Coa3	transcript	29.7834	28.1478	0.081484	0.879835	1
ENSMUST00000017339	ENSMUSG00000017195	Zpbp2	transcript	0	0	NA	1	1
ENSMUST00000017348	ENSMUSG00000017204	Gsdma	transcript	0.019568	0.015077	0.376147	0.801226	1
ENSMUST00000017354	ENSMUSG00000017210	Med24	transcript	16.6021	17.5104	-0.0768472	0.836112	1
ENSMUST00000017355	ENSMUSG00000017211	Gsdma2	transcript	0	0	NA	1	1
ENSMUST00000017365	ENSMUSG00000017221	Psmd3	transcript	40.2646	43.5178	-0.112092	0.759632	1
ENSMUST00000017384	ENSMUSG00000078676	Casc3	transcript	0.021577	0.0156667	0.461796	0.780966	1
ENSMUST00000017408	ENSMUSG00000017264	Exosc10	transcript	7.7308	6.90727	0.162502	0.750472	1
ENSMUST00000017430	ENSMUSG00000017286	Glod4	transcript	18.1313	18.0008	0.0104209	0.99879	1
ENSMUST00000017435	ENSMUSG00000017291	Taok1	transcript	1.77823	1.21122	0.553983	0.396776	1
ENSMUST00000017443	ENSMUSG00000017299	Dnttip1	transcript	8.97566	8.30204	0.112552	0.842086	1
ENSMUST00000017451	ENSMUSG00000017307	Acot8	transcript	0.451281	0	Inf	7.87e-06	0.00363465
ENSMUST00000017453	ENSMUSG00000017309	Cd300lg	transcript	0	0	NA	1	1
ENSMUST00000017454	ENSMUSG00000017310	Spint4	transcript	0	0	NA	1	1
ENSMUST00000017455	ENSMUSG00000017311	Pyy	transcript	0	0	NA	1	1
ENSMUST00000017458	ENSMUSG00000017314	Mpp2	transcript	23.5878	23.9389	-0.0213193	0.930617	1
ENSMUST00000017460	ENSMUSG00000017316	Ppy	transcript	0	0	NA	1	1
ENSMUST00000017488	ENSMUSG00000017344	Vtn	transcript	20.1868	18.9724	0.0895152	0.858659	1
ENSMUST00000017530	ENSMUSG00000017386	Traf4	transcript	3.0698	2.83081	0.116927	0.861414	1
ENSMUST00000017534	ENSMUSG00000017390	Aldoc	transcript	103.496	103.134	0.00505482	0.989131	1
ENSMUST00000017544	ENSMUSG00000017400	Stac2	transcript	26.1541	25.9682	0.0102928	0.998826	1
ENSMUST00000017548	ENSMUSG00000017404	Rpl19	transcript	192.717	184.731	0.0610591	0.903285	1
ENSMUST00000017549	ENSMUSG00000017405	Nek8	transcript	0.619244	0.567335	0.126305	0.875681	1
ENSMUST00000017552	ENSMUSG00000020882	Cacnb1	transcript	33.4143	35.4465	-0.0851755	0.80459	1
ENSMUST00000017561	ENSMUSG00000017417	Plxdc1	transcript	5.60678	6.78192	-0.274522	0.571319	1
ENSMUST00000017562	ENSMUSG00000017418	Arl5b	transcript	0.00545533	0.00384667	0.504059	0.687938	1
ENSMUST00000017567	ENSMUSG00000017421	Zfp207	transcript	0.480263	0.321576	0.578666	0.49292	1
ENSMUST00000017572	ENSMUSG00000017428	Psmd11	transcript	27.1466	25.2677	0.103476	0.822639	1
ENSMUST00000017576	ENSMUSG00000025576	Rbfox3	transcript	3.67388	4.15013	-0.175854	0.730433	1
ENSMUST00000017590	ENSMUSG00000017446	C1qtnf1	transcript	1.38547	1.64389	-0.246734	0.693226	1
ENSMUST00000017597	ENSMUSG00000017453	Pipox	transcript	0.302892	0.507552	-0.744754	0.382155	1
ENSMUST00000017604	ENSMUSG00000006519	Cyba	transcript	3.81355	3.29672	0.210104	0.775232	1
ENSMUST00000017610	ENSMUSG00000017466	Timp2	transcript	81.2119	84.1636	-0.0515058	0.867328	1
ENSMUST00000017620	ENSMUSG00000025575	Cant1	transcript	3.60984	4.98141	-0.46462	0.333182	1
ENSMUST00000017622	ENSMUSG00000017478	Zc3h18	transcript	0.0141823	0.0209327	-0.561661	0.681896	1
ENSMUST00000017629	ENSMUSG00000017485	Top2b	transcript	28.5633	28.8149	-0.0126498	0.948242	1
ENSMUST00000017637	ENSMUSG00000017493	Igfbp4	transcript	14.1495	15.5885	-0.13973	0.723821	1
ENSMUST00000017692	ENSMUSG00000017548	Suz12	transcript	10.2512	9.47071	0.114241	0.822895	1
ENSMUST00000017694	ENSMUSG00000017550	Atad5	transcript	0.616679	0.845559	-0.455386	0.693977	1
ENSMUST00000017732	ENSMUSG00000017588	Krt27	transcript	0	0	NA	1	1
ENSMUST00000017741	ENSMUSG00000020912	Krt12	transcript	0.779871	0.728981	0.0973543	0.934058	1
ENSMUST00000017743	ENSMUSG00000035775	Krt20	transcript	0.0214277	0.0256037	-0.256876	1	1
ENSMUST00000017751	ENSMUSG00000017607	Tns4	transcript	0.083665	0.084213	-0.00941874	1	1
ENSMUST00000017759	ENSMUSG00000017615	Tnfaip1	transcript	4.68856	8.16462	-0.80024	0.116492	1
ENSMUST00000017783	ENSMUSG00000017639	Rab11fip4	transcript	72.2311	75.5272	-0.0643751	0.837433	1
ENSMUST00000017799	ENSMUSG00000017652	Cd40	transcript	0.0513757	0.068007	-0.404598	0.716152	1
ENSMUST00000017808	ENSMUSG00000017664	Slc35c2	transcript	1.42131	3.41554	-1.2649	0.530729	1
ENSMUST00000017821	ENSMUSG00000017677	Wsb1	transcript	11.7954	11.1423	0.0821783	0.87884	1
ENSMUST00000017831	ENSMUSG00000017686	Rhot1	transcript	3.66005	3.10167	0.238818	0.686642	1
ENSMUST00000017836	ENSMUSG00000017692	Rhbdl3	transcript	6.41016	7.772	-0.277925	0.527966	1
ENSMUST00000017839	ENSMUSG00000020707	Rnf135	transcript	1.18819	1.14945	0.0478223	0.96166	1
ENSMUST00000017841	ENSMUSG00000017697	Ada	transcript	0.329644	0.708779	-1.10443	0.206358	1
ENSMUST00000017851	ENSMUSG00000017707	Serinc3	transcript	68.5638	68.8693	-0.00641307	0.961926	1
ENSMUST00000017864	ENSMUSG00000017720	Trp53tg5	transcript	0.00924867	0	Inf	0.622199	1
ENSMUST00000017867	ENSMUSG00000017723	Wfdc2	transcript	0.14975	0.12985	0.20571	1	1
ENSMUST00000017868	ENSMUSG00000017724	Etv4	transcript	1.09064	1.15256	-0.0796732	0.903095	1
ENSMUST00000017878	ENSMUSG00000017734	Dbndd2	transcript	18.3556	23.793	-0.374315	0.425114	1
ENSMUST00000017881	ENSMUSG00000017737	Mmp9	transcript	0.284216	0.320844	-0.174884	0.822843	1
ENSMUST00000017891	ENSMUSG00000017747	Ghdc	transcript	2.02493	1.94234	0.0600799	0.94084	1
ENSMUST00000017900	ENSMUSG00000017756	Slc12a7	transcript	1.12108	0.911823	0.298062	0.647432	1
ENSMUST00000017904	ENSMUSG00000017760	Ctsa	transcript	0.779826	0.65475	0.252207	0.831074	1
ENSMUST00000017908	ENSMUSG00000017764	Zswim1	transcript	7.50352	8.12762	-0.115267	0.792482	1
ENSMUST00000017911	ENSMUSG00000017767	Spata25	transcript	0.074821	0.0567867	0.397891	0.896055	1
ENSMUST00000017920	ENSMUSG00000017776	Crk	transcript	13.6966	8.7268	0.650294	0.22763	1
ENSMUST00000017945	ENSMUSG00000017801	Mlx	transcript	4.9299	2.22068	1.15056	0.0855746	1
ENSMUST00000017946	ENSMUSG00000017802	Fam134c	transcript	15.011	15.4199	-0.038769	0.908478	1
ENSMUST00000017961	ENSMUSG00000017817	Jph2	transcript	0.24662	0.309649	-0.328344	0.682639	1
ENSMUST00000017974	ENSMUSG00000017830	Dhx58	transcript	0.294625	0.299296	-0.0226915	0.988149	1
ENSMUST00000017975	ENSMUSG00000017831	Rab5a	transcript	44.0432	43.3287	0.0235961	0.975782	1
ENSMUST00000017976	ENSMUSG00000017832	Hspb9	transcript	0.0332543	0.0880863	-1.40538	0.417299	1
ENSMUST00000017981	ENSMUSG00000017837	Nkiras2	transcript	3.23386	3.74786	-0.212808	0.702794	1
ENSMUST00000018002	ENSMUSG00000017858	Ift52	transcript	9.52297	8.49023	0.165608	0.746773	1
ENSMUST00000018005	ENSMUSG00000017861	Mybl2	transcript	0.12269	0.195363	-0.671133	0.440065	1
ENSMUST00000018012	ENSMUSG00000017868	Sgk2	transcript	0.268779	0.219411	0.292784	0.835566	1
ENSMUST00000018050	ENSMUSG00000039671	Zmynd8	transcript	0.525501	0.709768	-0.433653	0.645876	1
ENSMUST00000018061	ENSMUSG00000021342	Prl	transcript	0.481696	0	Inf	0.0083853	0.454142
ENSMUST00000018066	ENSMUSG00000017922	Prl3c1	transcript	0	0	NA	1	1
ENSMUST00000018087	ENSMUSG00000017943	Gdap1l1	transcript	12.4574	11.9361	0.0616713	0.911641	1
ENSMUST00000018094	ENSMUSG00000017950	Hnf4a	transcript	0	0	NA	1	1
ENSMUST00000018113	ENSMUSG00000017969	Ptgis	transcript	0.851672	0.804793	0.0816802	0.935334	1
ENSMUST00000018122	ENSMUSG00000017978	Cadps2	transcript	0	7.90548	#NAME?	2.05e-05	0.00756292
ENSMUST00000018143	ENSMUSG00000017999	Ddx27	transcript	5.97405	6.4164	-0.103053	0.813174	1
ENSMUST00000018156	ENSMUSG00000018012	Rac3	transcript	7.28841	7.60087	-0.0605594	0.904961	1
ENSMUST00000018184	ENSMUSG00000018040	Rrp7a	transcript	16.601	18.2084	-0.133335	0.725022	1
ENSMUST00000018186	ENSMUSG00000018042	Cyb5r3	transcript	17.9541	17.5265	0.0347722	0.956294	1
ENSMUST00000018212	ENSMUSG00000018068	Ints2	transcript	3.36951	3.54383	-0.0727709	0.856828	1
ENSMUST00000018246	ENSMUSG00000018102	Hist1h2bc	transcript	35.1131	39.0709	-0.154087	0.726033	1
ENSMUST00000018274	ENSMUSG00000025162	Csnk1d	transcript	5.68867	5.8086	-0.0300987	0.958513	1
ENSMUST00000018287	ENSMUSG00000018143	Mafk	transcript	2.59752	3.00768	-0.211518	0.703882	1
ENSMUST00000018295	ENSMUSG00000068206	Pick1	transcript	4.92191	6.52729	-0.407265	0.483264	1
ENSMUST00000018304	ENSMUSG00000018160	Med1	transcript	0.784079	1.46398	-0.900822	0.380655	1
ENSMUST00000018311	ENSMUSG00000018167	Stard3	transcript	9.6816	9.75198	-0.0104506	0.965939	1
ENSMUST00000018313	ENSMUSG00000018169	Mfng	transcript	1.22974	1.32666	-0.109446	0.868077	1
ENSMUST00000018315	ENSMUSG00000018171	Vmp1	transcript	29.1384	30.3172	-0.0572174	0.864488	1
ENSMUST00000018333	ENSMUSG00000018189	Uchl5	transcript	2.11888	3.48411	-0.717487	0.32234	1
ENSMUST00000018337	ENSMUSG00000026361	Cdc73	transcript	9.04388	8.98081	0.0100959	0.993779	1
ENSMUST00000018353	ENSMUSG00000018209	Stk4	transcript	10.5079	11.2228	-0.0949587	0.800316	1
ENSMUST00000018355	ENSMUSG00000018211	Wfdc15b	transcript	0	0	NA	1	1
ENSMUST00000018361	ENSMUSG00000018217	Pmp22	transcript	7.81089	6.13855	0.34759	0.644162	1
ENSMUST00000018382	ENSMUSG00000018238	Gdf9	transcript	0.33242	0.289752	0.198189	0.808895	1
ENSMUST00000018383	ENSMUSG00000018239	Zcchc10	transcript	4.44314	4.32521	0.0388099	0.964878	1
ENSMUST00000018389	ENSMUSG00000021346	Prl8a8	transcript	0	0	NA	1	1
ENSMUST00000018392	ENSMUSG00000021345	Prl8a6	transcript	0	0	NA	1	1
ENSMUST00000018399	ENSMUSG00000035592	Krt33a	transcript	0	0	NA	1	1
ENSMUST00000018403	ENSMUSG00000018259	Prl8a2	transcript	0	0	NA	1	1
ENSMUST00000018407	ENSMUSG00000018263	Tbx5	transcript	0	0.002499	#NAME?	0.454129	1
ENSMUST00000018429	ENSMUSG00000020828	Pld2	transcript	3.22216	3.29708	-0.0331621	0.934043	1
ENSMUST00000018430	ENSMUSG00000018286	Psmb6	transcript	55.5702	59.7975	-0.105775	0.789346	1
ENSMUST00000018431	ENSMUSG00000018287	Spag7	transcript	15.2475	15.4128	-0.0155554	0.955941	1
ENSMUST00000018437	ENSMUSG00000018293	Pfn1	transcript	86.7478	76.7932	0.175848	0.691096	1
ENSMUST00000018449	ENSMUSG00000020850	Prpf8	transcript	45.683	40.3671	0.178476	0.670567	1
ENSMUST00000018466	ENSMUSG00000018322	Tomm34	transcript	17.1269	18.9707	-0.147509	0.720139	1
ENSMUST00000018470	ENSMUSG00000018326	Ywhab	transcript	172.259	161.616	0.0920123	0.827901	1
ENSMUST00000018476	ENSMUSG00000022329	Stk3	transcript	6.93436	6.1793	0.166319	0.749169	1
ENSMUST00000018478	ENSMUSG00000018334	Ksr1	transcript	12.7057	14.4948	-0.190055	0.627435	1
ENSMUST00000018482	ENSMUSG00000020400	Tnip1	transcript	0.922588	0	Inf	0.000603233	0.0784514
ENSMUST00000018485	ENSMUSG00000018341	Il12rb2	transcript	0.02908	0.0157533	0.88437	0.628453	1
ENSMUST00000018491	ENSMUSG00000018347	Zkscan6	transcript	0.215598	0.018534	3.5401	0.00844593	0.455712
ENSMUST00000018506	ENSMUSG00000018362	Kpna2	transcript	7.44908	8.65752	-0.216892	0.638513	1
ENSMUST00000018516	ENSMUSG00000018372	Cep95	transcript	1.81642	1.92266	-0.082005	0.878768	1
ENSMUST00000018521	ENSMUSG00000018377	Vezf1	transcript	4.43523	3.01568	0.556527	0.594464	1
ENSMUST00000018522	ENSMUSG00000018378	Cuedc1	transcript	0.925006	2.17597	-1.23413	0.54298	1
ENSMUST00000018531	ENSMUSG00000018387	Shroom1	transcript	0.11547	0.445823	-1.94896	0.312486	1
ENSMUST00000018544	ENSMUSG00000020486	2019-09-04	transcript	3.63204	3.49705	0.0546395	0.959549	1
ENSMUST00000018547	ENSMUSG00000020530	Ggnbp2	transcript	7.49811	7.23873	0.0507896	0.935518	1
ENSMUST00000018549	ENSMUSG00000018405	Mrm1	transcript	3.61109	3.44411	0.0683031	0.919926	1
ENSMUST00000018556	ENSMUSG00000018412	Kansl1	transcript	11.9124	11.2696	0.080016	0.871226	1
ENSMUST00000018561	ENSMUSG00000018417	Myo1b	transcript	8.45218	8.7471	-0.0494797	0.888363	1
ENSMUST00000018568	ENSMUSG00000020537	Drg2	transcript	18.1604	17.8368	0.025937	0.97528	1
ENSMUST00000018569	ENSMUSG00000018425	Dhx40	transcript	7.21771	7.55594	-0.0660698	0.864525	1
ENSMUST00000018571	ENSMUSG00000018427	Ypel2	transcript	15.919	17.3193	-0.121628	0.743606	1
ENSMUST00000018572	ENSMUSG00000018428	Akap1	transcript	11.327	10.9831	0.0444847	0.939736	1
ENSMUST00000018577	ENSMUSG00000018433	Nol11	transcript	7.26682	7.52367	-0.0501136	0.895525	1
ENSMUST00000018593	ENSMUSG00000018449	Rpain	transcript	3.94845	4.1264	-0.0635975	0.909387	1
ENSMUST00000018610	ENSMUSG00000020826	Nos2	transcript	0.0453763	0.0925537	-1.02835	0.348815	1
ENSMUST00000018614	ENSMUSG00000018470	Kcnab3	transcript	13.6194	16.1644	-0.247151	0.566882	1
ENSMUST00000018623	ENSMUSG00000018479	1700125H20Rik	transcript	0	0.0412833	#NAME?	0.110617	1
ENSMUST00000018625	ENSMUSG00000018481	Appbp2	transcript	24.3079	23.5475	0.0458523	0.929133	1
ENSMUST00000018630	ENSMUSG00000018486	Wnt9b	transcript	0.304287	0.372977	-0.293654	0.712202	1
ENSMUST00000018632	ENSMUSG00000057003	Myh4	transcript	0.088434	0.132764	-0.586191	0.497068	1
ENSMUST00000018637	ENSMUSG00000056328	Myh1	transcript	0	0	NA	1	1
ENSMUST00000018641	ENSMUSG00000033196	Myh2	transcript	0	0	NA	1	1
ENSMUST00000018644	ENSMUSG00000018500	Adora2b	transcript	1.67965	1.74036	-0.0512291	0.928249	1
ENSMUST00000018645	ENSMUSG00000018501	Ncor1	transcript	1.0633	0.46696	1.18718	0.248848	1
ENSMUST00000018651	ENSMUSG00000018507	Trpv2	transcript	3.22391	3.95349	-0.294319	0.576363	1
ENSMUST00000018653	ENSMUSG00000018509	Cenpv	transcript	8.19521	9.05309	-0.143629	0.782594	1
ENSMUST00000018681	ENSMUSG00000018537	Pcgf2	transcript	0.137328	0.173326	-0.335856	0.771917	1
ENSMUST00000018685	ENSMUSG00000018541	Cwc25	transcript	4.9264	4.96067	-0.0100003	0.967432	1
ENSMUST00000018691	ENSMUSG00000018547	Pip4k2b	transcript	37.7235	36.6256	0.0426106	0.933985	1
ENSMUST00000018698	ENSMUSG00000018554	Ybx2	transcript	0.0463253	0.211731	-2.19236	0.135179	1
ENSMUST00000018699	ENSMUSG00000020884	Asgr1	transcript	0	0	NA	1	1
ENSMUST00000018700	ENSMUSG00000020886	Dlg4	transcript	27.0253	24.1247	0.163802	0.730927	1
ENSMUST00000018710	ENSMUSG00000018566	Slc2a4	transcript	0.423632	0.438359	-0.0493002	0.943542	1
ENSMUST00000018711	ENSMUSG00000018567	Gabarap	transcript	50.2864	50.6524	-0.0104616	0.955746	1
ENSMUST00000018713	ENSMUSG00000018569	Cldn7	transcript	0	0.0388797	#NAME?	0.162112	1
ENSMUST00000018714	ENSMUSG00000018570	2810408A11Rik	transcript	0	0	NA	1	1
ENSMUST00000018716	ENSMUSG00000018572	Phf23	transcript	2.72743	3.30587	-0.277489	0.639942	1
ENSMUST00000018718	ENSMUSG00000018574	Acadvl	transcript	0.61081	0	Inf	0.00152972	0.150685
ENSMUST00000018719	ENSMUSG00000033987	Dnah17	transcript	0	0	NA	1	1
ENSMUST00000018727	ENSMUSG00000018583	G3bp1	transcript	12.6316	13.0373	-0.0456078	0.88731	1
ENSMUST00000018737	ENSMUSG00000018593	Sparc	transcript	21.4806	24.6762	-0.200083	0.633214	1
ENSMUST00000018739	ENSMUSG00000018595	Glra4	transcript	0.104225	0.126973	-0.28482	0.733438	1
ENSMUST00000018743	ENSMUSG00000018599	Mief2	transcript	5.23172	5.79823	-0.148327	0.751308	1
ENSMUST00000018744	ENSMUSG00000020534	Shmt1	transcript	0.971006	1.02681	-0.0806139	0.898029	1
ENSMUST00000018748	ENSMUSG00000018604	Tbx3	transcript	0.002523	0.003272	-0.375033	1	1
ENSMUST00000018755	ENSMUSG00000020388	Pdlim4	transcript	4.53206	5.25326	-0.213044	0.715735	1
ENSMUST00000018765	ENSMUSG00000005800	Mmp8	transcript	0.023145	0.024223	-0.065677	0.913299	1
ENSMUST00000018767	ENSMUSG00000018623	Mmp7	transcript	0	0	NA	1	1
ENSMUST00000018792	ENSMUSG00000018648	Dusp14	transcript	0.0492893	0.113546	-1.20393	0.29122	1
ENSMUST00000018795	ENSMUSG00000018651	Tada2a	transcript	8.48393	8.2137	0.0466995	0.94562	1
ENSMUST00000018798	ENSMUSG00000018654	Ikzf1	transcript	0.114476	0.0369423	1.6317	0.503523	1
ENSMUST00000018800	ENSMUSG00000061086	Myl4	transcript	0.198749	0	Inf	0.0329511	1
ENSMUST00000018803	ENSMUSG00000018659	Pnpo	transcript	14.0415	16.9565	-0.272144	0.52797	1
ENSMUST00000018805	ENSMUSG00000018661	Cog1	transcript	8.65567	9.04657	-0.0637262	0.866818	1
ENSMUST00000018810	ENSMUSG00000018666	Cbx1	transcript	1.76985	2.00044	-0.176693	0.79126	1
ENSMUST00000018816	ENSMUSG00000018672	Copz2	transcript	0.670841	0.471084	0.509985	0.627099	1
ENSMUST00000018821	ENSMUSG00000018677	Slc25a39	transcript	11.1269	13.1045	-0.23601	0.626768	1
ENSMUST00000018841	ENSMUSG00000018697	Aatf	transcript	6.23267	5.49289	0.182283	0.75417	1
ENSMUST00000018842	ENSMUSG00000018698	Lhx1	transcript	0.16256	0.171446	-0.076779	0.929513	1
ENSMUST00000018851	ENSMUSG00000018707	Dync1h1	transcript	100.305	105.838	-0.0774649	0.806401	1
ENSMUST00000018871	ENSMUSG00000018727	Cpsf4l	transcript	0.0232277	0	Inf	0.14785	1
ENSMUST00000018875	ENSMUSG00000035152	Ap2b1	transcript	80.7354	81.9596	-0.0217123	0.929297	1
ENSMUST00000018877	ENSMUSG00000018733	Pex12	transcript	0.111127	0.078553	0.500467	0.695092	1
ENSMUST00000018880	ENSMUSG00000018736	Ndel1	transcript	26.0096	28.2183	-0.117586	0.757769	1
ENSMUST00000018884	ENSMUSG00000018740	Slc25a35	transcript	0.740395	0.853605	-0.205275	0.751568	1
ENSMUST00000018887	ENSMUSG00000020900	Myh10	transcript	49.2438	49.4434	-0.00583572	0.961462	1
ENSMUST00000018896	ENSMUSG00000089669	Tnfsf13	transcript	0.23508	0.213183	0.141055	0.878276	1
ENSMUST00000018905	ENSMUSG00000018761	Mpdu1	transcript	14.6856	15.9886	-0.122637	0.778847	1
ENSMUST00000018909	ENSMUSG00000018765	Fxr2	transcript	34.3435	34.1764	0.00703653	0.991431	1
ENSMUST00000018914	ENSMUSG00000018770	Atp5g3	transcript	44.9955	43.2441	0.0572785	0.923082	1
ENSMUST00000018918	ENSMUSG00000018774	Cd68	transcript	4.2348	3.30001	0.359826	0.597591	1
ENSMUST00000018963	ENSMUSG00000018819	Lsp1	transcript	0.113838	0.470389	-2.04687	0.268024	1
ENSMUST00000018965	ENSMUSG00000018821	Avpi1	transcript	10.5228	11.726	-0.156182	0.749963	1
ENSMUST00000018966	ENSMUSG00000018822	Sfrp5	transcript	1.13435	1.2671	-0.159668	0.824122	1
ENSMUST00000018971	ENSMUSG00000053046	Brsk2	transcript	8.14109	7.63491	0.0926112	0.860882	1
ENSMUST00000018985	ENSMUSG00000018841	Rad51d	transcript	4.93113	4.90883	0.0065381	0.994611	1
ENSMUST00000018988	ENSMUSG00000018844	Fndc8	transcript	0.0259857	0.00322467	3.01049	0.290986	1
ENSMUST00000018989	ENSMUSG00000018845	Unc45b	transcript	0	0.0340627	#NAME?	0.0637354	1
ENSMUST00000018990	ENSMUSG00000018846	Pank3	transcript	15.4851	15.4194	0.00613463	0.989196	1
ENSMUST00000018992	ENSMUSG00000018848	Rars	transcript	14.5375	12.7215	0.19251	0.695735	1
ENSMUST00000018993	ENSMUSG00000018849	Wwc1	transcript	24.2979	22.533	0.108791	0.806058	1
ENSMUST00000019006	ENSMUSG00000018862	Otop3	transcript	0.073513	0.0344967	1.09154	0.374413	1
ENSMUST00000019012	ENSMUSG00000018868	Pnpla5	transcript	0	0.00590167	#NAME?	0.627988	1
ENSMUST00000019026	ENSMUSG00000018882	Mrpl45	transcript	8.78781	8.9071	-0.0194515	0.945873	1
ENSMUST00000019037	ENSMUSG00000018893	Mb	transcript	0	0	NA	1	1
ENSMUST00000019038	ENSMUSG00000059248	2019-09-09	transcript	3.20665	3.60063	-0.167184	0.749462	1
ENSMUST00000019043	ENSMUSG00000018899	Irf1	transcript	0.553504	0.581974	-0.0723601	0.937747	1
ENSMUST00000019044	ENSMUSG00000018900	Slc22a5	transcript	3.13889	2.99019	0.0700176	0.919076	1
ENSMUST00000019050	ENSMUSG00000018906	P4ha2	transcript	2.23727	2.22981	0.00481708	0.98727	1
ENSMUST00000019051	ENSMUSG00000018907	Alox12e	transcript	0.0392293	0.033678	0.220126	1	1
ENSMUST00000019058	ENSMUSG00000018914	Il3	transcript	0	0	NA	1	1
ENSMUST00000019060	ENSMUSG00000018916	Csf2	transcript	0	0	NA	1	1
ENSMUST00000019063	ENSMUSG00000018919	Tm4sf5	transcript	0.10996	0.144623	-0.395317	0.793206	1
ENSMUST00000019064	ENSMUSG00000018920	Cxcl16	transcript	0.462218	0.423973	0.124599	0.895682	1
ENSMUST00000019065	ENSMUSG00000018921	Pelp1	transcript	11.1791	10.694	0.0640044	0.906763	1
ENSMUST00000019067	ENSMUSG00000018923	Med11	transcript	3.73124	3.86201	-0.0496938	0.927102	1
ENSMUST00000019068	ENSMUSG00000018924	Alox15	transcript	0.0244003	0.0122157	0.998168	0.612438	1
ENSMUST00000019069	ENSMUSG00000018925	Heatr9	transcript	0	0	NA	1	1
ENSMUST00000019071	ENSMUSG00000018927	Ccl6	transcript	0.73024	0.523249	0.480873	0.579744	1
ENSMUST00000019074	ENSMUSG00000018930	Ccl4	transcript	0.0958543	0	Inf	0.0591126	1
ENSMUST00000019075	ENSMUSG00000018931	Natd1	transcript	3.29861	3.27935	0.00844687	0.996734	1
ENSMUST00000019076	ENSMUSG00000018932	Map2k3	transcript	3.81093	3.80998	0.00035981	0.98738	1
ENSMUST00000019101	ENSMUSG00000000037	Scml2	transcript	0.00294933	0.0415053	-3.81484	0.0338773	1
ENSMUST00000019109	ENSMUSG00000018965	Ywhah	transcript	342.903	359.934	-0.0699321	0.822739	1
ENSMUST00000019117	ENSMUSG00000018973	Hoxb1	transcript	0	0	NA	1	1
ENSMUST00000019118	ENSMUSG00000018974	Sart3	transcript	11.1212	11.4451	-0.04142	0.904461	1
ENSMUST00000019128	ENSMUSG00000000568	Hnrnpd	transcript	0.903938	0.864996	0.0635303	0.946893	1
ENSMUST00000019130	ENSMUSG00000018986	Slfn3	transcript	0.239432	0.226222	0.0818767	0.93148	1
ENSMUST00000019133	ENSMUSG00000057897	Camk2b	transcript	0.469816	0.796718	-0.761973	0.381418	1
ENSMUST00000019135	ENSMUSG00000020740	Gga3	transcript	15.1203	15.1768	-0.00538052	0.968154	1
ENSMUST00000019143	ENSMUSG00000018999	Slc35b4	transcript	12.6701	11.7862	0.104331	0.821135	1
ENSMUST00000019169	ENSMUSG00000002395	Use1	transcript	12.4807	10.1855	0.293171	0.615474	1
ENSMUST00000019183	ENSMUSG00000019039	Dalrd3	transcript	17.5641	16.1071	0.124932	0.800546	1
ENSMUST00000019192	ENSMUSG00000024041	Cryaa	transcript	0.0532257	0.0514017	0.050307	1	1
ENSMUST00000019198	ENSMUSG00000019054	Fis1	transcript	32.7569	37.6854	-0.202207	0.640136	1
ENSMUST00000019199	ENSMUSG00000019055	Plod1	transcript	5.53137	5.97264	-0.110732	0.797973	1
ENSMUST00000019220	ENSMUSG00000030374	Strn4	transcript	30.4089	29.4582	0.0458248	0.92917	1
ENSMUST00000019224	ENSMUSG00000019080	Mfsd3	transcript	1.80939	1.54472	0.228162	0.743984	1
ENSMUST00000019226	ENSMUSG00000019082	Slc25a22	transcript	8.34677	15.7861	-0.91936	0.0963612	1
ENSMUST00000019229	ENSMUSG00000006392	Med8	transcript	6.35107	6.48879	-0.0309498	0.946064	1
ENSMUST00000019231	ENSMUSG00000019087	Atp6ap1	transcript	83.3351	89.4236	-0.101732	0.768581	1
ENSMUST00000019232	ENSMUSG00000019088	Dnase1l1	transcript	0.413785	0.518183	-0.324581	0.722011	1
ENSMUST00000019246	ENSMUSG00000019102	Aldh3a1	transcript	0.168938	0.23446	-0.472851	0.75792	1
ENSMUST00000019248	ENSMUSG00000030577	Cd22	transcript	0.0455613	0.031848	0.516607	0.686477	1
ENSMUST00000019257	ENSMUSG00000000731	Aire	transcript	0	0.00600533	#NAME?	0.455964	1
ENSMUST00000019266	ENSMUSG00000019122	Ccl9	transcript	0.155589	0.193352	-0.313487	0.716669	1
ENSMUST00000019268	ENSMUSG00000019124	Scrn1	transcript	57.8538	54.985	0.0733747	0.868999	1
ENSMUST00000019276	ENSMUSG00000019132	BC005537	transcript	65.1487	59.801	0.123568	0.766852	1
ENSMUST00000019281	ENSMUSG00000027381	Bcl2l11	transcript	0.0150923	0.002287	2.72229	0.346367	1
ENSMUST00000019283	ENSMUSG00000019139	Isyna1	transcript	13.4826	14.639	-0.118723	0.778044	1
ENSMUST00000019287	ENSMUSG00000019143	Hars2	transcript	0.735893	1.34819	-0.873458	0.44262	1
ENSMUST00000019290	ENSMUSG00000019146	Cacng2	transcript	16.91	16.6918	0.0187431	0.985306	1
ENSMUST00000019291	ENSMUSG00000030373	Psg28	transcript	0	0	NA	1	1
ENSMUST00000019302	ENSMUSG00000019158	Tmem160	transcript	20.8484	22.6024	-0.116539	0.789649	1
ENSMUST00000019317	ENSMUSG00000019173	Rab5c	transcript	6.8222	8.41602	-0.302902	0.554196	1
ENSMUST00000019323	ENSMUSG00000019179	Mdh2	transcript	118.729	122.607	-0.046372	0.88257	1
ENSMUST00000019333	ENSMUSG00000019189	Rnf145	transcript	22.2918	25.6849	-0.204407	0.592162	1
ENSMUST00000019354	ENSMUSG00000019210	Atp6v1e1	transcript	170.854	178.077	-0.0597404	0.850464	1
ENSMUST00000019362	ENSMUSG00000020888	Dvl2	transcript	1.30653	0.0781347	4.06364	0.00313408	0.239497
ENSMUST00000019374	ENSMUSG00000019230	Lhx9	transcript	0.450618	0.633164	-0.490675	0.538105	1
ENSMUST00000019378	ENSMUSG00000021245	Mlh3	transcript	6.48299	6.70269	-0.0480826	0.89491	1
ENSMUST00000019379	ENSMUSG00000019235	Rps6kl1	transcript	9.48669	11.4923	-0.276694	0.534003	1
ENSMUST00000019382	ENSMUSG00000031708	Tecr	transcript	49.413	53.8981	-0.125343	0.747496	1
ENSMUST00000019386	ENSMUSG00000005251	Ripk4	transcript	0.157158	0.116542	0.431373	0.713214	1
ENSMUST00000019405	ENSMUSG00000019261	Map1s	transcript	18.1222	19.1107	-0.0766227	0.83539	1
ENSMUST00000019422	ENSMUSG00000019278	Dpep1	transcript	0.0410677	0.059357	-0.531415	0.749825	1
ENSMUST00000019426	ENSMUSG00000001804	Dsg4	transcript	0	0	NA	1	1
ENSMUST00000019439	ENSMUSG00000019295	Tmem129	transcript	7.15485	7.23272	-0.0156172	0.955455	1
ENSMUST00000019441	ENSMUSG00000019297	Nop9	transcript	3.09913	3.26756	-0.0763495	0.870202	1
ENSMUST00000019443	ENSMUSG00000047098	Rnf31	transcript	6.14448	6.19408	-0.0116003	0.960275	1
ENSMUST00000019445	ENSMUSG00000019301	Hsd17b1	transcript	0.087777	0.148102	-0.754673	0.543186	1
ENSMUST00000019447	ENSMUSG00000019303	Psmc3ip	transcript	0.720946	0.691592	0.05997	0.952751	1
ENSMUST00000019456	ENSMUSG00000019312	Grb7	transcript	1.11943	1.19171	-0.0902601	0.890886	1
ENSMUST00000019464	ENSMUSG00000019320	Noxo1	transcript	0.393328	0.399538	-0.0226011	0.980899	1
ENSMUST00000019469	ENSMUSG00000078650	G6pc	transcript	0.00667767	0.0247	-1.8871	0.449377	1
ENSMUST00000019470	ENSMUSG00000078652	Psme3	transcript	35.5407	34.431	0.0457671	0.932448	1
ENSMUST00000019482	ENSMUSG00000019338	Zfp687	transcript	6.51808	7.1483	-0.133154	0.747754	1
ENSMUST00000019503	ENSMUSG00000019359	Gdpd2	transcript	1.52667	1.13959	0.421866	0.542181	1
ENSMUST00000019506	ENSMUSG00000019362	D8Ertd738e	transcript	25.0967	26.974	-0.10407	0.8126	1
ENSMUST00000019512	ENSMUSG00000019368	Sec14l4	transcript	0.219404	0.148469	0.563434	0.549356	1
ENSMUST00000019514	ENSMUSG00000019370	Calm3	transcript	516.599	529.455	-0.0354638	0.898616	1
ENSMUST00000019516	ENSMUSG00000075590	Nrbp2	transcript	17.5837	18.6441	-0.0844764	0.82152	1
ENSMUST00000019517	ENSMUSG00000019373	Cops3	transcript	24.1422	23.1633	0.0597196	0.912236	1
ENSMUST00000019572	ENSMUSG00000059839	Zfp874b	transcript	4.64926	4.81292	-0.049911	0.897567	1
ENSMUST00000019576	ENSMUSG00000005481	Ddx39	transcript	3.67177	3.50027	0.069006	0.930062	1
ENSMUST00000019577	ENSMUSG00000019433	Gipc1	transcript	24.1429	25.8976	-0.10122	0.799371	1
ENSMUST00000019605	ENSMUSG00000019461	Plscr3	transcript	1.05621	1.16555	-0.142119	0.853514	1
ENSMUST00000019608	ENSMUSG00000019464	Ptger1	transcript	0.375116	0.460781	-0.296744	0.678572	1
ENSMUST00000019611	ENSMUSG00000019467	Arhgef25	transcript	26.8292	31.2883	-0.221823	0.586816	1
ENSMUST00000019614	ENSMUSG00000019470	Xab2	transcript	11.1234	11.1396	-0.00210548	0.97687	1
ENSMUST00000019615	ENSMUSG00000019471	Cdc37	transcript	31.6901	31.4275	0.0120028	0.999299	1
ENSMUST00000019616	ENSMUSG00000032174	Icam5	transcript	56.0511	60.163	-0.102135	0.772912	1
ENSMUST00000019625	ENSMUSG00000055775	Myh8	transcript	0.200074	0.228557	-0.192025	0.814257	1
ENSMUST00000019631	ENSMUSG00000019487	Trip10	transcript	1.57772	1.93442	-0.294059	0.639091	1
ENSMUST00000019633	ENSMUSG00000019489	Cd70	transcript	0.0706453	0.090976	-0.364892	0.828783	1
ENSMUST00000019638	ENSMUSG00000019494	Cops6	transcript	32.1309	32.5597	-0.0191265	0.942069	1
ENSMUST00000019649	ENSMUSG00000019505	Ubb	transcript	378.722	356.534	0.0871008	0.839555	1
ENSMUST00000019660	ENSMUSG00000029729	Zkscan1	transcript	7.05605	5.435	0.376579	0.45146	1
ENSMUST00000019662	ENSMUSG00000019518	Ap4m1	transcript	4.86548	5.15307	-0.0828511	0.866606	1
ENSMUST00000019677	ENSMUSG00000028708	Mknk1	transcript	6.3448	6.26312	0.0186939	0.988786	1
ENSMUST00000019679	ENSMUSG00000002343	Armc6	transcript	8.09031	8.62152	-0.0917467	0.831557	1
ENSMUST00000019683	ENSMUSG00000019539	Rcn3	transcript	0.5782	0.800174	-0.468745	0.59496	1
ENSMUST00000019684	ENSMUSG00000002504	Slc9a3r2	transcript	1.33028	1.83182	-0.461539	0.508011	1
ENSMUST00000019697	ENSMUSG00000078762	Haus5	transcript	1.76433	1.6447	0.101296	0.890035	1
ENSMUST00000019701	ENSMUSG00000031383	Dusp9	transcript	0.221364	0.199544	0.149709	0.875201	1
ENSMUST00000019708	ENSMUSG00000019564	Arid3a	transcript	1.02146	1.22428	-0.261306	0.691446	1
ENSMUST00000019721	ENSMUSG00000019577	Pdk4	transcript	3.68697	4.8313	-0.389976	0.428842	1
ENSMUST00000019722	ENSMUSG00000019578	Ubxn6	transcript	19.2138	20.8182	-0.115701	0.763552	1
ENSMUST00000019723	ENSMUSG00000019579	D17Wsu104e	transcript	11.4603	11.9424	-0.0594466	0.883892	1
ENSMUST00000019726	ENSMUSG00000024197	Plin3	transcript	7.61861	8.43039	-0.146072	0.742517	1
ENSMUST00000019734	ENSMUSG00000019590	Cyb561	transcript	15.9336	19.5509	-0.295156	0.474607	1
ENSMUST00000019749	ENSMUSG00000027102	Hoxd8	transcript	0	0.003739	#NAME?	0.626909	1
ENSMUST00000019791	ENSMUSG00000019647	Sema6a	transcript	2.44289	2.35871	0.0505916	0.938153	1
ENSMUST00000019803	ENSMUSG00000019659	Ccdc12	transcript	13.0677	13.3567	-0.0315499	0.935606	1
ENSMUST00000019808	ENSMUSG00000011305	Plin5	transcript	0.192781	0.0183343	3.39435	0.0224424	0.840092
ENSMUST00000019833	ENSMUSG00000019689	1110001J03Rik	transcript	18.1872	18.7293	-0.0423758	0.930508	1
ENSMUST00000019843	ENSMUSG00000019699	Akt3	transcript	0.385504	0.440606	-0.192742	0.843826	1
ENSMUST00000019854	ENSMUSG00000019710	Mrpl24	transcript	5.14792	3.99073	0.367338	0.575524	1
ENSMUST00000019859	ENSMUSG00000019715	Gle1	transcript	10.6019	11.499	-0.11718	0.768623	1
ENSMUST00000019861	ENSMUSG00000042197	Zfp451	transcript	4.23304	4.43633	-0.0676708	0.866676	1
ENSMUST00000019862	ENSMUSG00000019718	L3hypdh	transcript	0.740832	0.907521	-0.292784	0.687836	1
ENSMUST00000019876	ENSMUSG00000019732	Calr3	transcript	0.32698	0.290345	0.171437	0.883911	1
ENSMUST00000019878	ENSMUSG00000078813	Leng1	transcript	1.95579	1.78411	0.132544	0.861361	1
ENSMUST00000019882	ENSMUSG00000019738	Polr2i	transcript	3.16294	3.34347	-0.0800783	0.899895	1
ENSMUST00000019896	ENSMUSG00000019762	Iyd	transcript	0.502537	0.455887	0.140554	0.889488	1
ENSMUST00000019901	ENSMUSG00000019767	Ccdc170	transcript	0	0	NA	1	1
ENSMUST00000019906	ENSMUSG00000019772	Vip	transcript	13.1915	13.4852	-0.0317612	0.928194	1
ENSMUST00000019907	ENSMUSG00000019773	Fbxo5	transcript	0.360334	0.392009	-0.121552	0.895909	1
ENSMUST00000019908	ENSMUSG00000019774	Mtrf1l	transcript	2.07044	2.43727	-0.235329	0.685086	1
ENSMUST00000019909	ENSMUSG00000019775	Rgs17	transcript	0.126604	0.540023	-2.09269	0.0644415	1
ENSMUST00000019911	ENSMUSG00000019777	Hdac2	transcript	29.398	26.8999	0.12812	0.784079	1
ENSMUST00000019913	ENSMUSG00000019779	Frk	transcript	0	0.0678833	#NAME?	0.00189244	0.172994
ENSMUST00000019917	ENSMUSG00000019782	Rwdd1	transcript	24.3705	25.7955	-0.0819786	0.83769	1
ENSMUST00000019920	ENSMUSG00000019785	Clvs2	transcript	13.1697	12.2854	0.100283	0.842416	1
ENSMUST00000019924	ENSMUSG00000019789	Hey2	transcript	2.02969	1.9209	0.0794815	0.910361	1
ENSMUST00000019925	ENSMUSG00000019791	Hint3	transcript	0.166058	0.216506	-0.382723	0.816184	1
ENSMUST00000019927	ENSMUSG00000019792	Trmt11	transcript	2.51604	2.37168	0.0852458	0.904779	1
ENSMUST00000019929	ENSMUSG00000019794	Katna1	transcript	1.86523	2.45663	-0.397326	0.738653	1
ENSMUST00000019931	ENSMUSG00000019796	Lrp11	transcript	11.8546	15.982	-0.430999	0.346688	1
ENSMUST00000019932	ENSMUSG00000019797	1700021F05Rik	transcript	8.2399	8.4209	-0.0313472	0.943078	1
ENSMUST00000019937	ENSMUSG00000019802	Sec63	transcript	15.6242	14.8001	0.0781711	0.870068	1
ENSMUST00000019938	ENSMUSG00000019803	Nr2e1	transcript	3.87834	3.3531	0.209943	0.706761	1
ENSMUST00000019939	ENSMUSG00000019804	Snx3	transcript	43.7667	51.5029	-0.234819	0.58036	1
ENSMUST00000019942	ENSMUSG00000019806	Aig1	transcript	1.59861	1.63832	-0.0354012	0.957887	1
ENSMUST00000019944	ENSMUSG00000019808	Adat2	transcript	3.94944	3.79524	0.0574585	0.942302	1
ENSMUST00000019945	ENSMUSG00000019809	Pex3	transcript	0.458499	1.38557	-1.59549	0.0370553	1
ENSMUST00000019950	ENSMUSG00000019814	Ltv1	transcript	5.1099	5.23937	-0.0360957	0.9319	1
ENSMUST00000019951	ENSMUSG00000019813	Cep57l1	transcript	0.614338	0.804159	-0.388448	0.805468	1
ENSMUST00000019954	ENSMUSG00000019815	Zc2hc1b	transcript	0	0	NA	1	1
ENSMUST00000019955	ENSMUSG00000075225	Ccdc162	transcript	0.0127777	0.0716107	-2.48655	0.237784	1
ENSMUST00000019962	ENSMUSG00000019818	Cd164	transcript	21.0199	19.9676	0.0740997	0.882639	1
ENSMUST00000019965	ENSMUSG00000019822	Smpd2	transcript	4.04143	4.24902	-0.0722647	0.893908	1
ENSMUST00000019967	ENSMUSG00000019823	Mical1	transcript	1.95162	1.91367	0.0283314	0.980112	1
ENSMUST00000019974	ENSMUSG00000019832	Rab32	transcript	0.607986	0.895955	-0.559388	0.456635	1
ENSMUST00000019975	ENSMUSG00000019831	Wasf1	transcript	57.399	51.6413	0.152501	0.722156	1
ENSMUST00000019977	ENSMUSG00000063428	Ddo	transcript	1.56829	1.61982	-0.0466408	0.933259	1
ENSMUST00000019978	ENSMUSG00000019834	Slc22a16	transcript	0	0	NA	1	1
ENSMUST00000019982	ENSMUSG00000019837	Gtf3c6	transcript	5.32665	5.99443	-0.170395	0.768492	1
ENSMUST00000019986	ENSMUSG00000019841	Rev3l	transcript	8.35448	8.12387	0.040382	0.942702	1
ENSMUST00000019987	ENSMUSG00000019842	Traf3ip2	transcript	0.331625	0.289119	0.197892	0.818437	1
ENSMUST00000019991	ENSMUSG00000019845	Tube1	transcript	0.627975	0.775093	-0.303662	0.664582	1
ENSMUST00000019992	ENSMUSG00000019846	Lama4	transcript	1.62966	1.57506	0.0491675	0.944288	1
ENSMUST00000019994	ENSMUSG00000019848	Popdc3	transcript	0.504764	0.615719	-0.286661	0.713213	1
ENSMUST00000019997	ENSMUSG00000019850	Tnfaip3	transcript	1.02594	0.476283	1.10706	0.107143	1
ENSMUST00000019998	ENSMUSG00000019851	Perp	transcript	2.87438	2.93033	-0.027811	0.959615	1
ENSMUST00000019999	ENSMUSG00000019852	D10Bwg1379e	transcript	29.4619	31.0923	-0.0777081	0.81265	1
ENSMUST00000020000	ENSMUSG00000019853	Hebp2	transcript	0.953449	0.943712	0.0148081	1	1
ENSMUST00000020002	ENSMUSG00000078453	Abracl	transcript	5.556	4.70804	0.238921	0.728858	1
ENSMUST00000020003	ENSMUSG00000019856	Fam184a	transcript	4.461	5.20013	-0.221182	0.674289	1
ENSMUST00000020004	ENSMUSG00000019857	Asf1a	transcript	7.3192	6.85066	0.095444	0.863743	1
ENSMUST00000020008	ENSMUSG00000019861	Gopc	transcript	9.28339	13.4103	-0.530623	0.666836	1
ENSMUST00000020012	ENSMUSG00000019863	Qrsl1	transcript	4.62257	4.48401	0.0439035	0.951841	1
ENSMUST00000020015	ENSMUSG00000019865	Nmbr	transcript	1.27875	1.2332	0.0523248	0.961772	1
ENSMUST00000020016	ENSMUSG00000019867	Gje1	transcript	0.0269417	0.0158037	0.76958	0.538988	1
ENSMUST00000020017	ENSMUSG00000019866	Aim1	transcript	0.417574	0.298115	0.486161	0.502456	1
ENSMUST00000020022	ENSMUSG00000019872	Smpdl3a	transcript	8.14299	8.33594	-0.0337873	0.923869	1
ENSMUST00000020023	ENSMUSG00000019873	Reep3	transcript	7.55213	6.99404	0.110757	0.825336	1
ENSMUST00000020024	ENSMUSG00000019874	Fabp7	transcript	25.7144	20.4307	0.33184	0.538413	1
ENSMUST00000020027	ENSMUSG00000019877	Serinc1	transcript	300.035	295.919	0.0199293	0.982433	1
ENSMUST00000020034	ENSMUSG00000019883	Echdc1	transcript	4.22233	3.18748	0.405621	0.507913	1
ENSMUST00000020039	ENSMUSG00000019888	Mgat4c	transcript	0.00234867	0.00609067	-1.37476	0.646294	1
ENSMUST00000020040	ENSMUSG00000019890	Nts	transcript	4.7452	5.12812	-0.111962	0.838934	1
ENSMUST00000020043	ENSMUSG00000019892	Lrriq1	transcript	0.0494887	0.0507137	-0.0352764	0.97217	1
ENSMUST00000020045	ENSMUSG00000019893	Ros1	transcript	0	0	NA	1	1
ENSMUST00000020049	ENSMUSG00000019897	Ccdc59	transcript	7.88429	7.22531	0.12592	0.823681	1
ENSMUST00000020057	ENSMUSG00000019906	Lin7a	transcript	14.2261	14.6141	-0.0388153	0.902848	1
ENSMUST00000020062	ENSMUSG00000019905	Gprc6a	transcript	0.00452133	0.00465467	-0.0419296	1	1
ENSMUST00000020064	ENSMUSG00000019909	Fam162b	transcript	0	0	NA	1	1
ENSMUST00000020071	ENSMUSG00000019913	Sim1	transcript	0.12182	0.189166	-0.634898	0.440809	1
ENSMUST00000020077	ENSMUSG00000019920	Lims1	transcript	0.59618	0.582971	0.0323247	0.972173	1
ENSMUST00000020078	ENSMUSG00000019920	Lims1	transcript	6.71723	6.82933	-0.0238775	0.938634	1
ENSMUST00000020081	ENSMUSG00000019923	Zwint	transcript	329.979	343.419	-0.0575958	0.852561	1
ENSMUST00000020085	ENSMUSG00000019927	Ube2d1	transcript	18.9463	19.1622	-0.0163486	0.952982	1
ENSMUST00000020094	ENSMUSG00000019936	Epyc	transcript	0	0	NA	1	1
ENSMUST00000020099	ENSMUSG00000019942	Cdk1	transcript	0.0557817	0.049447	0.173908	0.964213	1
ENSMUST00000020101	ENSMUSG00000019944	Rhobtb1	transcript	0.266867	0.206249	0.371736	0.82806	1
ENSMUST00000020102	ENSMUSG00000019935	Slc17a8	transcript	1.0493	1.44251	-0.459153	0.447566	1
ENSMUST00000020103	ENSMUSG00000019945	1700040L02Rik	transcript	0.625295	0.673091	-0.106264	0.908741	1
ENSMUST00000020106	ENSMUSG00000019947	Arid5b	transcript	10.5224	11.1234	-0.0801299	0.826999	1
ENSMUST00000020107	ENSMUSG00000019943	Atp2b1	transcript	140.725	137.039	0.0382906	0.942932	1
ENSMUST00000020109	ENSMUSG00000019948	Actr6	transcript	7.75565	8.09753	-0.0622343	0.884858	1
ENSMUST00000020112	ENSMUSG00000019951	Uhrf1bp1l	transcript	20.2852	20.0712	0.0153056	0.992164	1
ENSMUST00000020113	ENSMUSG00000019952	Poc1b	transcript	0.019694	0.275864	-3.80813	0.00635851	0.385388
ENSMUST00000020118	ENSMUSG00000019960	Dusp6	transcript	21.0657	19.1037	0.141041	0.759193	1
ENSMUST00000020123	ENSMUSG00000019961	Tmpo	transcript	1.94381	1.86455	0.0600585	0.932474	1
ENSMUST00000020129	ENSMUSG00000019966	Kitl	transcript	0.414311	0.31986	0.373274	0.708897	1
ENSMUST00000020145	ENSMUSG00000019970	Sgk1	transcript	8.44829	9.24458	-0.129949	0.764122	1
ENSMUST00000020149	ENSMUSG00000019975	Ikbip	transcript	2.01101	1.6954	0.246295	0.708699	1
ENSMUST00000020150	ENSMUSG00000019975	Ikbip	transcript	3.9696	3.48145	0.189303	0.778646	1
ENSMUST00000020153	ENSMUSG00000019977	Hbs1l	transcript	12.938	13.6179	-0.0738891	0.846435	1
ENSMUST00000020157	ENSMUSG00000019979	Apaf1	transcript	1.78346	1.79691	-0.010842	0.978904	1
ENSMUST00000020158	ENSMUSG00000019982	Myb	transcript	0.0140097	0.0143857	-0.0382095	1	1
ENSMUST00000020159	ENSMUSG00000019984	Med23	transcript	4.31286	3.27157	0.398661	0.748745	1
ENSMUST00000020161	ENSMUSG00000019987	Arg1	transcript	0.0171763	0.0874273	-2.34766	0.107333	1
ENSMUST00000020163	ENSMUSG00000019988	Nedd1	transcript	0.935528	1.09042	-0.221025	0.72855	1
ENSMUST00000020165	ENSMUSG00000019990	Pde7b	transcript	19.4559	21.0836	-0.115908	0.750874	1
ENSMUST00000020169	ENSMUSG00000019989	Enpp3	transcript	0.168048	0.12665	0.408027	0.644905	1
ENSMUST00000020171	ENSMUSG00000019997	Ctgf	transcript	13.024	9.72411	0.42153	0.37886	1
ENSMUST00000020173	ENSMUSG00000019996	Map7	transcript	0.508056	0.498652	0.0269561	0.980828	1
ENSMUST00000020174	ENSMUSG00000019998	Stx7	transcript	32.5565	32.2293	0.0145731	0.996219	1
ENSMUST00000020182	ENSMUSG00000020003	Pex7	transcript	3.2619	1.66862	0.96706	0.21457	1
ENSMUST00000020185	ENSMUSG00000020007	Il20ra	transcript	0.259871	0.349325	-0.426773	0.628661	1
ENSMUST00000020188	ENSMUSG00000020009	Ifngr1	transcript	6.15954	6.08768	0.0169305	0.994376	1
ENSMUST00000020190	ENSMUSG00000020010	Vnn3	transcript	0.008901	0.008656	0.0402669	1	1
ENSMUST00000020197	ENSMUSG00000028886	Eya3	transcript	0	0	NA	1	1
ENSMUST00000020200	ENSMUSG00000020014	Cfap54	transcript	0.013694	0.00788733	0.795934	1	1
ENSMUST00000020203	ENSMUSG00000020018	Snrpf	transcript	7.89164	9.93779	-0.3326	0.555621	1
ENSMUST00000020204	ENSMUSG00000020019	Ntn4	transcript	2.99865	2.5452	0.236534	0.681187	1
ENSMUST00000020208	ENSMUSG00000020021	Fgd6	transcript	3.20484	3.41563	-0.0918995	0.821225	1
ENSMUST00000020209	ENSMUSG00000020022	Ndufa12	transcript	2.92197	4.26959	-0.547157	0.399453	1
ENSMUST00000020212	ENSMUSG00000020024	Cep83	transcript	9.71182	8.66291	0.16489	0.741677	1
ENSMUST00000020215	ENSMUSG00000020027	Socs2	transcript	4.7576	4.35173	0.128646	0.829257	1
ENSMUST00000020217	ENSMUSG00000020029	Nudt4	transcript	47.5367	44.5628	0.0932014	0.833382	1
ENSMUST00000020220	ENSMUSG00000020032	Nuak1	transcript	20.4487	22.0938	-0.111629	0.754356	1
ENSMUST00000020223	ENSMUSG00000020034	Tcp11l2	transcript	6.56469	7.1357	-0.120329	0.785123	1
ENSMUST00000020227	ENSMUSG00000020038	Cry1	transcript	7.86845	8.38057	-0.0909687	0.829053	1
ENSMUST00000020231	ENSMUSG00000020042	Btbd11	transcript	4.62035	5.56291	-0.267837	0.597001	1
ENSMUST00000020234	ENSMUSG00000020044	Timp3	transcript	27.6143	30.5398	-0.145275	0.687678	1
ENSMUST00000020238	ENSMUSG00000020048	Hsp90b1	transcript	125.384	121.068	0.0505351	0.919266	1
ENSMUST00000020241	ENSMUSG00000020051	Pah	transcript	0.0865273	0.0626727	0.46532	0.716843	1
ENSMUST00000020243	ENSMUSG00000020052	Ascl1	transcript	1.69925	1.61655	0.0719855	0.929999	1
ENSMUST00000020248	ENSMUSG00000020056	Ccdc53	transcript	2.69042	2.92493	-0.120569	0.848384	1
ENSMUST00000020249	ENSMUSG00000020057	Dram1	transcript	0.287247	0.300996	-0.0674542	0.94907	1
ENSMUST00000020251	ENSMUSG00000035311	Gnptab	transcript	15.6673	16.6083	-0.0841482	0.810639	1
ENSMUST00000020252	ENSMUSG00000020059	Sycp3	transcript	0.169164	0.189312	-0.162346	0.936907	1
ENSMUST00000020253	ENSMUSG00000060002	Chpt1	transcript	10.2408	8.81151	0.216869	0.649506	1
ENSMUST00000020255	ENSMUSG00000020062	Slc5a8	transcript	0.00993767	0.0169817	-0.772999	0.625118	1
ENSMUST00000020257	ENSMUSG00000020063	Sirt1	transcript	4.99229	3.39183	0.55764	0.422371	1
ENSMUST00000020258	ENSMUSG00000020064	Herc4	transcript	9.23136	9.21147	0.00311118	0.984882	1
ENSMUST00000020262	ENSMUSG00000020072	Pbld1	transcript	0.250365	0.225769	0.149184	0.87799	1
ENSMUST00000020263	ENSMUSG00000020069	Hnrnph3	transcript	6.41774	6.37884	0.00877268	0.995391	1
ENSMUST00000020266	ENSMUSG00000020072	Pbld1	transcript	0.0288203	0.0229267	0.33006	0.926987	1
ENSMUST00000020268	ENSMUSG00000020074	Ccar1	transcript	10.5055	10.0984	0.0570065	0.916949	1
ENSMUST00000020270	ENSMUSG00000020076	Ddx50	transcript	19.0529	19.9314	-0.0650344	0.857696	1
ENSMUST00000020271	ENSMUSG00000020077	Srgn	transcript	3.06744	2.30214	0.414059	0.560879	1
ENSMUST00000020273	ENSMUSG00000020079	Supv3l1	transcript	7.14782	7.34023	-0.0383218	0.91808	1
ENSMUST00000020277	ENSMUSG00000020080	Hkdc1	transcript	2.23192	2.02957	0.137112	0.833443	1
ENSMUST00000020278	ENSMUSG00000020081	Tacr2	transcript	0.0874863	0.088902	-0.0231582	1	1
ENSMUST00000020283	ENSMUSG00000020086	H2afy2	transcript	7.59569	6.91573	0.135299	0.80077	1
ENSMUST00000020284	ENSMUSG00000020087	Tysnd1	transcript	6.04176	6.96842	-0.205864	0.665746	1
ENSMUST00000020285	ENSMUSG00000020088	Sar1a	transcript	42.6171	41.9849	0.0215617	0.979224	1
ENSMUST00000020286	ENSMUSG00000020089	Ppa1	transcript	33.1759	33.33	-0.00668363	0.966967	1
ENSMUST00000020287	ENSMUSG00000020090	Npffr1	transcript	0.765786	0.918404	-0.262188	0.750117	1
ENSMUST00000020288	ENSMUSG00000020091	Eif4ebp2	transcript	15.688	16.52	-0.0745506	0.850919	1
ENSMUST00000020289	ENSMUSG00000020092	Pald1	transcript	2.48376	2.78783	-0.166616	0.740094	1
ENSMUST00000020298	ENSMUSG00000020098	Pcbd1	transcript	2.89817	3.76672	-0.378167	0.581806	1
ENSMUST00000020301	ENSMUSG00000020101	4632428N05Rik	transcript	3.89548	3.6227	0.104735	0.846272	1
ENSMUST00000020307	ENSMUSG00000020107	Anapc16	transcript	3.8202	2.75694	0.470581	0.698448	1
ENSMUST00000020308	ENSMUSG00000020108	Ddit4	transcript	19.6693	23.1294	-0.233785	0.58173	1
[truncated: 46,719 more rows]
