# Supplementary material for: Identifying lncRNA–miRNA–mRNA networks to investigate Alzheimer’s disease pathogenesis and therapy strategy
Source: Aging (Albany NY). 2020 Feb 7;12(3):2897–920. doi: 10.18632/aging.102785 (PMC7041741; doi:10.18632/aging.102785)
Supplement: Supplementary Table 6 [file aging-12-102785-s014..xlsx]

## Sheet: Supplemental_Table_S6
Supplementary Table S6. Differentially expressed mRNAs between the APP/PS1 and WT at 9 months.
transcript_id	gene_id	gene_name	feature_id	AD_9m_FPKM	WT_9m_FPKM	log2.foldchange.	pvalue	qvalue
ENSMUST00000000001	ENSMUSG00000000001	Gnai3	transcript	10.3108	10.9285	-0.0839379	0.82676	1
ENSMUST00000000003	ENSMUSG00000000003	Pbsn	transcript	0	0	NA	1	1
ENSMUST00000000010	ENSMUSG00000020875	Hoxb9	transcript	0	0.00515867	#NAME?	0.63198	1
ENSMUST00000000028	ENSMUSG00000000028	Cdc45	transcript	0.395785	0.561358	-0.504206	0.55097	1
ENSMUST00000000033	ENSMUSG00000048583	Igf2	transcript	2.2821	1.43814	0.666158	0.320453	1
ENSMUST00000000049	ENSMUSG00000000049	Apoh	transcript	0.150221	0.158691	-0.079134	1	1
ENSMUST00000000058	ENSMUSG00000000058	Cav2	transcript	13.0356	12.1465	0.101922	0.835097	1
ENSMUST00000000080	ENSMUSG00000000078	Klf6	transcript	14.0371	13.9705	0.00685984	0.997284	1
ENSMUST00000000087	ENSMUSG00000000085	Scmh1	transcript	7.88119	8.41145	-0.0939419	0.815181	1
ENSMUST00000000090	ENSMUSG00000000088	Cox5a	transcript	109.426	110.848	-0.0186191	0.945867	1
ENSMUST00000000094	ENSMUSG00000061689	Dlgap4	transcript	2.40493	2.07546	0.212566	0.769312	1
ENSMUST00000000095	ENSMUSG00000000093	Tbx2	transcript	0.45004	0.474213	-0.0754841	0.913134	1
ENSMUST00000000096	ENSMUSG00000000094	Tbx4	transcript	0	0	NA	1	1
ENSMUST00000000109	ENSMUSG00000055022	Cntn1	transcript	9.44911	11.9309	-0.336457	0.580213	1
ENSMUST00000000122	ENSMUSG00000000120	Ngfr	transcript	1.51749	1.32386	0.196936	0.774124	1
ENSMUST00000000127	ENSMUSG00000000125	Wnt3	transcript	1.61567	1.47009	0.136227	0.842326	1
ENSMUST00000000128	ENSMUSG00000000126	Wnt9a	transcript	0.276966	0.800085	-1.53044	0.1275	1
ENSMUST00000000129	ENSMUSG00000000127	Fer	transcript	8.48632	8.79356	-0.0513091	0.891893	1
ENSMUST00000000137	ENSMUSG00000020152	Actr2	transcript	115.749	115.201	0.00685491	0.997305	1
ENSMUST00000000145	ENSMUSG00000020333	Acsl6	transcript	0	0	NA	1	1
ENSMUST00000000153	ENSMUSG00000000149	Gna12	transcript	25.2559	25.5151	-0.0147313	0.951952	1
ENSMUST00000000161	ENSMUSG00000000157	Itgb2l	transcript	0	0	NA	1	1
ENSMUST00000000163	ENSMUSG00000000159	Igsf5	transcript	0.0467773	0.125556	-1.42445	0.333777	1
ENSMUST00000000171	ENSMUSG00000000167	Pih1d2	transcript	0.542155	0.466306	0.217429	0.815982	1
ENSMUST00000000175	ENSMUSG00000000171	Sdhd	transcript	33.0987	33.6808	-0.0251497	0.935043	1
ENSMUST00000000186	ENSMUSG00000000182	Fgf23	transcript	0.139946	0.108646	0.365227	0.764785	1
ENSMUST00000000187	ENSMUSG00000000183	Fgf6	transcript	0	0	NA	1	1
ENSMUST00000000188	ENSMUSG00000000184	Ccnd2	transcript	14.6033	18.5502	-0.345135	0.349676	1
ENSMUST00000000193	ENSMUSG00000035385	Ccl2	transcript	0.102201	0.0765277	0.417351	0.8792	1
ENSMUST00000000194	ENSMUSG00000035352	Ccl12	transcript	0.442911	0.404874	0.129543	0.974191	1
ENSMUST00000000199	ENSMUSG00000062661	Ncs1	transcript	82.3633	85.0475	-0.0462673	0.872521	1
ENSMUST00000000201	ENSMUSG00000000197	Nalcn	transcript	24.4331	23.5719	0.0517641	0.903092	1
ENSMUST00000000206	ENSMUSG00000000202	Btbd17	transcript	7.38103	8.58697	-0.218328	0.644411	1
ENSMUST00000000208	ENSMUSG00000000204	Slfn4	transcript	0.00681967	0.028581	-2.06728	0.274082	1
ENSMUST00000000219	ENSMUSG00000000214	Th	transcript	2.69611	2.19391	0.297376	0.68353	1
ENSMUST00000000220	ENSMUSG00000000215	Ins2	transcript	0	0	NA	1	1
ENSMUST00000000221	ENSMUSG00000000216	Scnn1g	transcript	0.0717657	0.046697	0.619964	0.622718	1
ENSMUST00000000253	ENSMUSG00000000247	Lhx2	transcript	12.7953	14.3093	-0.161334	0.689875	1
ENSMUST00000000254	ENSMUSG00000000248	Clec2g	transcript	0	0	NA	1	1
ENSMUST00000000260	ENSMUSG00000000253	Gmpr	transcript	17.9316	15.7099	0.190835	0.676063	1
ENSMUST00000000266	ENSMUSG00000026535	Ifi202b	transcript	0	0	NA	1	1
ENSMUST00000000275	ENSMUSG00000038257	Glra3	transcript	5.29675	5.52384	-0.0605639	0.897592	1
ENSMUST00000000284	ENSMUSG00000000275	Trim25	transcript	0.005885	0	Inf	0.252411	1
ENSMUST00000000285	ENSMUSG00000000276	Dgke	transcript	17.4801	17.0978	0.0319021	0.951743	1
ENSMUST00000000287	ENSMUSG00000000278	Scpep1	transcript	5.49173	5.01762	0.130259	0.817153	1
ENSMUST00000000291	ENSMUSG00000000282	Mnt	transcript	11.0186	10.7421	0.0366627	0.945067	1
ENSMUST00000000299	ENSMUSG00000000290	Itgb2	transcript	2.08828	1.34093	0.639083	0.306185	1
ENSMUST00000000304	ENSMUSG00000000295	Hddc2	transcript	7.59359	6.1173	0.311888	0.61039	1
ENSMUST00000000305	ENSMUSG00000000296	Tpd52l1	transcript	8.1057	9.49647	-0.228454	0.648432	1
ENSMUST00000000310	ENSMUSG00000000301	Pemt	transcript	0.358209	0.365876	-0.0305532	0.989394	1
ENSMUST00000000312	ENSMUSG00000000303	Cdh1	transcript	0.865313	0.843628	0.0366151	0.971968	1
ENSMUST00000000314	ENSMUSG00000000305	Cdh4	transcript	5.96978	5.84726	0.0299169	0.959173	1
ENSMUST00000000317	ENSMUSG00000000308	Ckmt1	transcript	92.3938	91.0928	0.0204596	0.972004	1
ENSMUST00000000326	ENSMUSG00000000317	Bcl6b	transcript	0.265382	0.481761	-0.860249	0.276525	1
ENSMUST00000000327	ENSMUSG00000000318	Clec10a	transcript	0	0.001758	#NAME?	1	1
ENSMUST00000000329	ENSMUSG00000000320	Alox12	transcript	0.125645	0.0541883	1.2133	0.20683	1
ENSMUST00000000335	ENSMUSG00000000326	Comt	transcript	5.9484	5.00831	0.248178	0.684251	1
ENSMUST00000000342	ENSMUSG00000020676	Ccl11	transcript	0.0802463	0.010364	2.95285	0.124224	1
ENSMUST00000000348	ENSMUSG00000000339	Rtca	transcript	16.9599	17.8107	-0.0706237	0.85553	1
ENSMUST00000000349	ENSMUSG00000000340	Dbt	transcript	5.59449	6.04247	-0.111133	0.7946	1
ENSMUST00000000356	ENSMUSG00000000346	Dazap2	transcript	45.3472	44.767	0.0185768	0.978825	1
ENSMUST00000000365	ENSMUSG00000000355	Mcts1	transcript	21.1793	21.5154	-0.0227108	0.95015	1
ENSMUST00000000369	ENSMUSG00000000359	Rem1	transcript	0.242707	0.215688	0.170268	0.90445	1
ENSMUST00000000384	ENSMUSG00000000374	Trappc10	transcript	28.13	27.9677	0.00834468	1	1
ENSMUST00000000388	ENSMUSG00000000378	Ccm2	transcript	10.8458	9.60867	0.174734	0.717345	1
ENSMUST00000000394	ENSMUSG00000000384	Tbrg4	transcript	5.73484	6.48945	-0.178343	0.711209	1
ENSMUST00000000395	ENSMUSG00000000385	Tmprss2	transcript	0	0.00355	#NAME?	0.461419	1
ENSMUST00000000402	ENSMUSG00000000392	Fap	transcript	0	0	NA	1	1
ENSMUST00000000412	ENSMUSG00000000402	Egfl6	transcript	0.746656	0.666436	0.163977	0.835587	1
ENSMUST00000000421	ENSMUSG00000000411	Tssk3	transcript	0.0386987	0.063612	-0.717015	0.620193	1
ENSMUST00000000430	ENSMUSG00000000420	Galnt1	transcript	0.245301	0.171961	0.51247	0.563274	1
ENSMUST00000000445	ENSMUSG00000000435	Myf5	transcript	0	0.012749	#NAME?	0.368837	1
ENSMUST00000000449	ENSMUSG00000000439	Mkrn2	transcript	13.2824	11.9175	0.156441	0.733834	1
ENSMUST00000000450	ENSMUSG00000000440	Pparg	transcript	0.003752	0.00592967	-0.660291	0.759374	1
ENSMUST00000000451	ENSMUSG00000000441	Raf1	transcript	15.2975	15.3225	-0.00235916	0.97998	1
ENSMUST00000000466	ENSMUSG00000028494	Plin2	transcript	2.24183	2.19213	0.0323489	0.97299	1
ENSMUST00000000476	ENSMUSG00000029231	Pdgfra	transcript	9.2817	8.64837	0.10196	0.815738	1
ENSMUST00000000500	ENSMUSG00000000489	Pdgfb	transcript	9.31742	9.20141	0.0180744	0.981928	1
ENSMUST00000000505	ENSMUSG00000029730	Mcm7	transcript	2.84117	2.45421	0.211222	0.719734	1
ENSMUST00000000514	ENSMUSG00000026315	Serpinb8	transcript	0.960812	0.904174	0.0876527	0.957613	1
ENSMUST00000000542	ENSMUSG00000000530	Acvrl1	transcript	1.68933	2.2623	-0.421339	0.565793	1
ENSMUST00000000543	ENSMUSG00000000531	Grasp	transcript	17.5294	18.984	-0.115008	0.770989	1
ENSMUST00000000544	ENSMUSG00000000532	Acvr1b	transcript	32.1873	31.5738	0.0277615	0.95699	1
ENSMUST00000000572	ENSMUSG00000000560	Gabra2	transcript	37.2102	38.2013	-0.0379232	0.909847	1
ENSMUST00000000573	ENSMUSG00000074340	Ovgp1	transcript	0.396053	0.431239	-0.122792	0.863334	1
ENSMUST00000000574	ENSMUSG00000000562	Adora3	transcript	0.285926	0.30216	-0.0796709	0.924714	1
ENSMUST00000000579	ENSMUSG00000000567	Sox9	transcript	9.03099	9.79624	-0.117343	0.768625	1
ENSMUST00000000590	ENSMUSG00000032050	Rdx	transcript	18.0736	18.7132	-0.0501691	0.877418	1
ENSMUST00000000594	ENSMUSG00000000581	C1d	transcript	10.003	9.55399	0.0662638	0.8933	1
ENSMUST00000000608	ENSMUSG00000000594	Gm2a	transcript	13.3654	12.5491	0.090916	0.839118	1
ENSMUST00000000619	ENSMUSG00000000605	Clcn4-2	transcript	41.6415	40.901	0.0258873	0.962022	1
ENSMUST00000000631	ENSMUSG00000000617	Grm6	transcript	0	0	NA	1	1
ENSMUST00000000632	ENSMUSG00000044807	Zfp354c	transcript	0.00917	0.00982667	-0.0997804	1	1
ENSMUST00000000641	ENSMUSG00000000627	Sema4f	transcript	11.0488	10.0904	0.130903	0.768688	1
ENSMUST00000000642	ENSMUSG00000000628	Hk2	transcript	1.21575	1.00759	0.270937	0.655527	1
ENSMUST00000000645	ENSMUSG00000000631	Myo18a	transcript	0.013529	0.023158	-0.775455	0.586717	1
ENSMUST00000000646	ENSMUSG00000000632	Sez6	transcript	16.9922	15.6123	0.122188	0.776077	1
ENSMUST00000000674	ENSMUSG00000029534	St7	transcript	0	0	NA	1	1
ENSMUST00000000687	ENSMUSG00000000673	Haao	transcript	0.151896	0.0391957	1.95432	0.146305	1
ENSMUST00000000696	ENSMUSG00000000682	Cd52	transcript	2.71401	1.36027	0.996537	0.219046	1
ENSMUST00000000704	ENSMUSG00000000690	Hoxb6	transcript	0	0	NA	1	1
ENSMUST00000000707	ENSMUSG00000000693	Loxl3	transcript	0.732497	0.801012	-0.129	0.840869	1
ENSMUST00000000717	ENSMUSG00000000701	Tcl1b5	transcript	0	0	NA	1	1
ENSMUST00000000718	ENSMUSG00000079007	Tcl1b4	transcript	0	0	NA	1	1
ENSMUST00000000724	ENSMUSG00000000708	Kat2b	transcript	6.67301	6.88157	-0.0444008	0.901294	1
ENSMUST00000000727	ENSMUSG00000000711	Rab5b	transcript	48.7939	48.0865	0.0210688	0.972245	1
ENSMUST00000000746	ENSMUSG00000000730	Dnmt3l	transcript	0	0	NA	1	1
ENSMUST00000000755	ENSMUSG00000000739	Sult5a1	transcript	0.139276	0.0983977	0.501254	0.612445	1
ENSMUST00000000756	ENSMUSG00000000740	Rpl13	transcript	193.618	188.271	0.0404016	0.927219	1
ENSMUST00000000759	ENSMUSG00000000743	Chmp1a	transcript	27.5734	26.427	0.0612663	0.894559	1
ENSMUST00000000767	ENSMUSG00000000751	Rpa1	transcript	1.36478	0.0936017	3.86599	0.0233931	0.906339
ENSMUST00000000769	ENSMUSG00000000753	Serpinf1	transcript	2.72922	3.06593	-0.167836	0.774315	1
ENSMUST00000000776	ENSMUSG00000000759	Tubgcp3	transcript	9.75358	9.22251	0.0807728	0.864347	1
ENSMUST00000000783	ENSMUSG00000000766	Oprm1	transcript	0.017125	0.0262413	-0.615737	0.775664	1
ENSMUST00000000793	ENSMUSG00000000776	Polr3d	transcript	4.5162	4.79166	-0.0854169	0.865179	1
ENSMUST00000000804	ENSMUSG00000000787	Ddx3x	transcript	53.5626	52.3686	0.0325258	0.944175	1
ENSMUST00000000808	ENSMUSG00000000791	Il12rb1	transcript	0.404459	0.376033	0.105133	0.903428	1
ENSMUST00000000809	ENSMUSG00000000792	Slc5a5	transcript	4.50693	3.32986	0.436684	0.479241	1
ENSMUST00000000811	ENSMUSG00000000794	Kcnn3	transcript	4.83606	5.65192	-0.224909	0.626292	1
ENSMUST00000000828	ENSMUSG00000000811	Txnrd3	transcript	1.41262	1.29544	0.124927	0.861428	1
ENSMUST00000000834	ENSMUSG00000000817	Fasl	transcript	0.043317	0.0365363	0.245601	0.942651	1
ENSMUST00000000844	ENSMUSG00000000827	Tpd52l2	transcript	1.90792	0.686653	1.47434	0.111018	1
ENSMUST00000000881	ENSMUSG00000000861	Bcl11a	transcript	5.30409	5.36363	-0.0161055	0.960051	1
ENSMUST00000000889	ENSMUSG00000000869	Il4	transcript	0	0	NA	1	1
ENSMUST00000000894	ENSMUSG00000027490	E2f1	transcript	2.8177	2.70865	0.0569427	0.931325	1
ENSMUST00000000895	ENSMUSG00000027489	Necab3	transcript	20.015	18.2659	0.131928	0.773511	1
ENSMUST00000000896	ENSMUSG00000000876	Pxmp4	transcript	3.894	3.78419	0.0412663	0.951966	1
ENSMUST00000000901	ENSMUSG00000000881	Dlg3	transcript	15.0976	15.793	-0.0649655	0.849172	1
ENSMUST00000000910	ENSMUSG00000000889	Dbh	transcript	0.0337017	0.0786047	-1.2218	0.24482	1
ENSMUST00000000924	ENSMUSG00000000901	Mmp11	transcript	0.405712	0.445347	-0.134473	0.861623	1
ENSMUST00000000925	ENSMUSG00000000902	Smarcb1	transcript	9.93286	9.94478	-0.00173018	0.983469	1
ENSMUST00000000926	ENSMUSG00000000903	Vpreb3	transcript	0	0	NA	1	1
ENSMUST00000000939	ENSMUSG00000000915	Hip1r	transcript	16.8619	16.9697	-0.00918747	0.964863	1
ENSMUST00000000940	ENSMUSG00000000916	Nsun5	transcript	2.69748	2.70443	-0.00371265	0.98404	1
ENSMUST00000000958	ENSMUSG00000000934	Top1mt	transcript	5.4909	5.05015	0.120717	0.832438	1
ENSMUST00000000964	ENSMUSG00000029844	Hoxa1	transcript	0	0.00589867	#NAME?	0.631969	1
ENSMUST00000000984	ENSMUSG00000000958	Slc7a7	transcript	0.639605	0.529237	0.273266	0.734026	1
ENSMUST00000000985	ENSMUSG00000000959	Oxa1l	transcript	11.2854	11.2294	0.00717319	1	1
ENSMUST00000001002	ENSMUSG00000000976	Heatr6	transcript	3.27763	3.16821	0.0489874	0.929183	1
ENSMUST00000001008	ENSMUSG00000000982	Ccl3	transcript	0.450944	0.0668597	2.75374	0.0239368	0.920055
ENSMUST00000001009	ENSMUSG00000000983	Wfdc18	transcript	0.600257	0.82208	-0.453697	0.637556	1
ENSMUST00000001027	ENSMUSG00000063558	Aox1	transcript	1.43799	1.5467	-0.105141	0.848524	1
ENSMUST00000001036	ENSMUSG00000032175	Tyk2	transcript	2.2616	2.25107	0.006735	1	1
ENSMUST00000001040	ENSMUSG00000001014	Icam4	transcript	0.37135	0.485577	-0.386918	0.697777	1
ENSMUST00000001042	ENSMUSG00000001016	Ilf2	transcript	25.695	26.1184	-0.0235805	0.938031	1
ENSMUST00000001043	ENSMUSG00000001017	Chtop	transcript	1.23861	1.13228	0.129486	0.860789	1
ENSMUST00000001046	ENSMUSG00000001020	S100a4	transcript	1.27893	1.58531	-0.309827	0.722646	1
ENSMUST00000001047	ENSMUSG00000001021	S100a3	transcript	0.293315	0.319292	-0.122425	0.894274	1
ENSMUST00000001049	ENSMUSG00000001023	S100a5	transcript	0.045366	0	Inf	0.371382	1
ENSMUST00000001051	ENSMUSG00000001025	S100a6	transcript	10.6131	7.77886	0.448213	0.460018	1
ENSMUST00000001055	ENSMUSG00000001029	Icam2	transcript	0.659743	0.845655	-0.358165	0.647253	1
ENSMUST00000001059	ENSMUSG00000020715	Ern1	transcript	2.54948	2.74687	-0.107584	0.801004	1
ENSMUST00000001063	ENSMUSG00000001036	Epn2	transcript	0.90434	0.968537	-0.0989414	0.869557	1
ENSMUST00000001079	ENSMUSG00000001052	Sec24b	transcript	11.3969	12.1924	-0.0973319	0.78982	1
ENSMUST00000001080	ENSMUSG00000001053	N4bp3	transcript	4.61112	5.10121	-0.145722	0.765069	1
ENSMUST00000001081	ENSMUSG00000001054	Rmnd5b	transcript	19.7899	20.0081	-0.0158168	0.955301	1
ENSMUST00000001092	ENSMUSG00000001065	Zfp276	transcript	4.52013	4.62946	-0.0344803	0.926054	1
ENSMUST00000001108	ENSMUSG00000029106	Add1	transcript	0.00261767	0.00226633	0.207921	1	1
ENSMUST00000001109	ENSMUSG00000001082	Mfsd10	transcript	0.968806	0.990492	-0.031938	0.966719	1
ENSMUST00000001112	ENSMUSG00000052783	Grk4	transcript	0.357413	0.215553	0.729548	0.397546	1
ENSMUST00000001115	ENSMUSG00000074886	Grk6	transcript	13.3134	13.2478	0.00712187	0.994965	1
ENSMUST00000001116	ENSMUSG00000001089	Luzp1	transcript	0.682215	0.824449	-0.273203	0.672561	1
ENSMUST00000001122	ENSMUSG00000001095	Slc13a2	transcript	0.00512667	0	Inf	0.628642	1
ENSMUST00000001125	ENSMUSG00000001098	Kctd10	transcript	0.943	0.822295	0.197601	0.824235	1
ENSMUST00000001126	ENSMUSG00000020829	Slc46a1	transcript	3.48273	3.06841	0.182731	0.770323	1
ENSMUST00000001127	ENSMUSG00000001100	Poldip2	transcript	27.2329	26.8189	0.0221011	0.973064	1
ENSMUST00000001130	ENSMUSG00000001103	Sebox	transcript	1.05006	0.555373	0.918948	0.247401	1
ENSMUST00000001147	ENSMUSG00000001119	Col6a1	transcript	3.8894	4.23425	-0.122561	0.782456	1
ENSMUST00000001148	ENSMUSG00000001120	Pcbp3	transcript	7.76853	7.77353	-0.000927757	0.983975	1
ENSMUST00000001155	ENSMUSG00000001127	Araf	transcript	2.0864	2.14614	-0.0407244	0.93929	1
ENSMUST00000001156	ENSMUSG00000001128	Cfp	transcript	1.26492	1.84049	-0.541051	0.434489	1
ENSMUST00000001166	ENSMUSG00000001138	Cnnm3	transcript	3.31515	2.96999	0.158616	0.752394	1
ENSMUST00000001172	ENSMUSG00000079610	Ankrd39	transcript	1.15183	1.2811	-0.153455	0.842924	1
ENSMUST00000001179	ENSMUSG00000001151	Pcnt	transcript	6.30002	6.43897	-0.0314746	0.921325	1
ENSMUST00000001181	ENSMUSG00000020241	Col6a2	transcript	1.75676	1.88227	-0.0995611	0.852976	1
ENSMUST00000001183	ENSMUSG00000001155	Ftcd	transcript	0.010957	0.004063	1.43124	0.845364	1
ENSMUST00000001184	ENSMUSG00000001156	Mxd1	transcript	6.41199	6.9758	-0.121588	0.764327	1
ENSMUST00000001185	ENSMUSG00000001157	Gmcl1	transcript	8.73145	8.64577	0.0142262	0.990907	1
ENSMUST00000001186	ENSMUSG00000001158	Snrnp27	transcript	19.0907	18.4088	0.05247	0.926677	1
ENSMUST00000001187	ENSMUSG00000029994	Anxa4	transcript	1.90005	1.60849	0.240329	0.730846	1
ENSMUST00000001202	ENSMUSG00000001173	Ocrl	transcript	10.7012	8.80698	0.28105	0.515065	1
ENSMUST00000001204	ENSMUSG00000001175	Calm1	transcript	0.172986	1.00131	-2.53316	0.0236409	0.912578
ENSMUST00000001226	ENSMUSG00000022436	Sh3bp1	transcript	4.65875	4.91485	-0.0772047	0.86732	1
ENSMUST00000001240	ENSMUSG00000001211	Agpat3	transcript	14.2832	13.5759	0.0732652	0.865461	1
ENSMUST00000001242	ENSMUSG00000053329	D10Jhu81e	transcript	27.6174	26.8977	0.0380932	0.943081	1
ENSMUST00000001247	ENSMUSG00000029130	Rnf32	transcript	1.68953	1.66779	0.0186883	0.98582	1
ENSMUST00000001253	ENSMUSG00000020651	Slc26a4	transcript	1.01285	0.950941	0.0909966	0.90146	1
ENSMUST00000001254	ENSMUSG00000001225	Slc26a3	transcript	0.0626463	0.0235543	1.41124	0.260737	1
ENSMUST00000001256	ENSMUSG00000001227	Sema6b	transcript	34.0521	32.9995	0.0453002	0.920098	1
ENSMUST00000001258	ENSMUSG00000001228	Uhrf1	transcript	0.186677	0.174964	0.0934861	0.942805	1
ENSMUST00000001279	ENSMUSG00000001247	Lsr	transcript	0.891438	1.27021	-0.510863	0.502305	1
ENSMUST00000001280	ENSMUSG00000001248	Gramd1a	transcript	21.0957	20.0389	0.0741504	0.869956	1
ENSMUST00000001304	ENSMUSG00000001270	Ckb	transcript	638.93	607.835	0.0719801	0.849344	1
ENSMUST00000001319	ENSMUSG00000001300	Efnb2	transcript	14.9693	15.1092	-0.01342	0.956246	1
ENSMUST00000001326	ENSMUSG00000001280	Sp1	transcript	6.04979	6.4786	-0.0987962	0.792884	1
ENSMUST00000001327	ENSMUSG00000001281	Itgb7	transcript	0.236713	0.140608	0.751457	0.408833	1
ENSMUST00000001331	ENSMUSG00000001285	Myg1	transcript	0	0	NA	1	1
ENSMUST00000001339	ENSMUSG00000001305	Rrp15	transcript	3.30518	3.24639	0.0258947	0.981574	1
ENSMUST00000001347	ENSMUSG00000001313	Rnd2	transcript	54.3656	53.0309	0.0358624	0.944337	1
ENSMUST00000001384	ENSMUSG00000001349	Cnn1	transcript	0.26114	0.206503	0.338663	0.703652	1
ENSMUST00000001402	ENSMUSG00000001366	Fbxo9	transcript	0.00220367	6.22977	-11.4651	5.26841e-05	0.0176758
ENSMUST00000001412	ENSMUSG00000001376	Ccdc132	transcript	4.34164	4.11608	0.0769698	0.887448	1
ENSMUST00000001415	ENSMUSG00000006050	Sra1	transcript	11.2381	10.6154	0.0822367	0.870105	1
ENSMUST00000001416	ENSMUSG00000001380	Hars	transcript	27.7225	28.3212	-0.0308242	0.922153	1
ENSMUST00000001419	ENSMUSG00000001383	Zmat2	transcript	39.3331	39.0036	0.0121363	0.992182	1
ENSMUST00000001439	ENSMUSG00000001403	Ube2c	transcript	0	0	NA	1	1
ENSMUST00000001451	ENSMUSG00000001415	Smg5	transcript	18.4799	18.618	-0.0107449	0.959535	1
ENSMUST00000001452	ENSMUSG00000001416	Cct3	transcript	32.7448	29.8345	0.134284	0.755374	1
ENSMUST00000001454	ENSMUSG00000001418	Glmp	transcript	0	0	NA	1	1
ENSMUST00000001455	ENSMUSG00000001419	Mef2d	transcript	35.4935	36.3177	-0.033119	0.907519	1
ENSMUST00000001456	ENSMUSG00000001420	Tmem79	transcript	0.118684	0.108121	0.134478	0.884933	1
ENSMUST00000001460	ENSMUSG00000001424	Snd1	transcript	25.8076	23.9144	0.109915	0.788869	1
ENSMUST00000001479	ENSMUSG00000001440	Kpnb1	transcript	42.3448	42.5109	-0.00564878	0.968045	1
ENSMUST00000001480	ENSMUSG00000001441	Npepps	transcript	40.0385	39.6983	0.0123091	0.989683	1
ENSMUST00000001484	ENSMUSG00000001444	Tbx21	transcript	0.035861	0.014861	1.27088	0.444367	1
ENSMUST00000001485	ENSMUSG00000001445	Mrpl10	transcript	19.4008	19.0029	0.0298913	0.959641	1
ENSMUST00000001497	ENSMUSG00000022219	Cideb	transcript	1.63593	1.91923	-0.230416	0.732918	1
ENSMUST00000001507	ENSMUSG00000001467	Cyp51	transcript	13.9372	14.0293	-0.00950177	0.965409	1
ENSMUST00000001513	ENSMUSG00000001473	Tubb6	transcript	0.630826	0.620761	0.0232057	0.983562	1
ENSMUST00000001520	ENSMUSG00000031967	Afg3l1	transcript	6.3879	6.35908	0.00652351	0.997548	1
ENSMUST00000001522	ENSMUSG00000001482	Def8	transcript	0.0501033	0.237414	-2.24442	0.200902	1
ENSMUST00000001534	ENSMUSG00000001494	Sost	transcript	0.0536213	0.0528617	0.0205852	1	1
ENSMUST00000001536	ENSMUSG00000001496	Nkx2-1	transcript	0.354667	0.407011	-0.198603	0.835452	1
ENSMUST00000001538	ENSMUSG00000001497	Pax9	transcript	0	0	NA	1	1
ENSMUST00000001544	ENSMUSG00000023186	Vwa5a	transcript	5.64422	3.55633	0.666385	0.152169	1
ENSMUST00000001547	ENSMUSG00000001506	Col1a1	transcript	2.06315	2.18742	-0.0843843	0.858694	1
ENSMUST00000001548	ENSMUSG00000001507	Itga3	transcript	3.39193	2.89876	0.226671	0.676177	1
ENSMUST00000001559	ENSMUSG00000001518	Itfg2	transcript	6.9317	7.60079	-0.13294	0.763313	1
ENSMUST00000001561	ENSMUSG00000001520	Nrip2	transcript	6.34842	6.38738	-0.00882836	0.97483	1
ENSMUST00000001562	ENSMUSG00000001521	Tulp3	transcript	4.35002	4.80633	-0.143913	0.748005	1
ENSMUST00000001565	ENSMUSG00000001524	Gtf2h4	transcript	4.47683	4.67608	-0.0628235	0.903938	1
ENSMUST00000001566	ENSMUSG00000001525	Tubb5	transcript	138.93	137.2	0.0180796	0.97681	1
ENSMUST00000001569	ENSMUSG00000059714	Flot1	transcript	37.0475	35.4708	0.0627442	0.893018	1
ENSMUST00000001583	ENSMUSG00000001542	Ell2	transcript	9.41788	9.1577	0.0404169	0.941668	1
ENSMUST00000001592	ENSMUSG00000001552	Jup	transcript	14.8066	14.6249	0.0178137	0.98295	1
ENSMUST00000001595	ENSMUSG00000001555	Fkbp10	transcript	2.06261	1.81786	0.182229	0.778657	1
ENSMUST00000001599	ENSMUSG00000001558	Klhl10	transcript	0.0795093	0.0980277	-0.302065	0.772652	1
ENSMUST00000001608	ENSMUSG00000001566	Mnx1	transcript	0	0	NA	1	1
ENSMUST00000001611	ENSMUSG00000001569	Nom1	transcript	6.40063	6.55666	-0.0347455	0.920783	1
ENSMUST00000001620	ENSMUSG00000027680	Fxr1	transcript	9.44151	9.61249	-0.0258925	0.939669	1
ENSMUST00000001626	ENSMUSG00000001583	Tnk1	transcript	0.0392317	0.0240963	0.703205	0.725773	1
ENSMUST00000001631	ENSMUSG00000001588	Acap1	transcript	0.0130367	0.00745567	0.806166	0.831539	1
ENSMUST00000001652	ENSMUSG00000021070	Bdkrb2	transcript	0.588488	0.513661	0.196195	0.825852	1
ENSMUST00000001667	ENSMUSG00000001622	Csn3	transcript	0	0	NA	1	1
ENSMUST00000001672	ENSMUSG00000001627	Ifrd1	transcript	9.53836	8.87463	0.104054	0.825319	1
ENSMUST00000001675	ENSMUSG00000001630	Stk38l	transcript	7.39815	7.45659	-0.011352	0.963874	1
ENSMUST00000001699	ENSMUSG00000022484	Hoxc10	transcript	0	0	NA	1	1
ENSMUST00000001700	ENSMUSG00000001655	Hoxc13	transcript	0.00502433	0.00535933	-0.0931214	1	1
ENSMUST00000001701	ENSMUSG00000001656	Hoxc11	transcript	0	0	NA	1	1
ENSMUST00000001703	ENSMUSG00000001657	Hoxc8	transcript	0	0	NA	1	1
ENSMUST00000001706	ENSMUSG00000036139	Hoxc9	transcript	0	0	NA	1	1
ENSMUST00000001709	ENSMUSG00000022485	Hoxc5	transcript	0.004126	0	Inf	0.631365	1
ENSMUST00000001711	ENSMUSG00000001661	Hoxc6	transcript	0	0	NA	1	1
ENSMUST00000001712	ENSMUSG00000020196	Cabin1	transcript	14.282	14.1677	0.0115905	0.993834	1
ENSMUST00000001713	ENSMUSG00000001663	Gstt1	transcript	3.9614	3.43742	0.204688	0.76417	1
ENSMUST00000001715	ENSMUSG00000001665	Gstt3	transcript	1.55358	1.18907	0.385761	0.587587	1
ENSMUST00000001716	ENSMUSG00000001666	Ddt	transcript	18.6129	18.5917	0.00164075	0.990995	1
ENSMUST00000001720	ENSMUSG00000001670	Tat	transcript	0.0156957	0.025975	-0.726757	0.726428	1
ENSMUST00000001722	ENSMUSG00000001672	Marveld3	transcript	0.188408	0.0978047	0.945885	0.433063	1
ENSMUST00000001724	ENSMUSG00000001674	Ddx18	transcript	7.86129	7.9537	-0.0168607	0.956876	1
ENSMUST00000001757	ENSMUSG00000001707	Eef1e1	transcript	14.6596	14.5636	0.00947762	0.997001	1
ENSMUST00000001780	ENSMUSG00000001729	Akt1	transcript	44.5333	43.8006	0.0239334	0.966431	1
ENSMUST00000001790	ENSMUSG00000001739	Cldn15	transcript	0	0	NA	1	1
ENSMUST00000001792	ENSMUSG00000001741	Il16	transcript	1.65243	1.56237	0.0808563	0.895681	1
ENSMUST00000001801	ENSMUSG00000001750	Tcirg1	transcript	2.63899	2.1525	0.293976	0.659701	1
ENSMUST00000001802	ENSMUSG00000001751	Naglu	transcript	2.95766	2.21269	0.418654	0.481477	1
ENSMUST00000001806	ENSMUSG00000001755	Coasy	transcript	1.85593	1.68104	0.142793	0.875341	1
ENSMUST00000001809	ENSMUSG00000022283	Pabpc1	transcript	54.2843	55.0711	-0.0207605	0.936328	1
ENSMUST00000001812	ENSMUSG00000001761	Smo	transcript	4.38413	4.37216	0.00394636	0.993932	1
ENSMUST00000001818	ENSMUSG00000001767	Crnkl1	transcript	6.86157	6.95832	-0.0202014	0.949246	1
ENSMUST00000001824	ENSMUSG00000001773	Folh1	transcript	3.65952	3.38916	0.110726	0.879048	1
ENSMUST00000001825	ENSMUSG00000001774	Chordc1	transcript	22.7196	27.0677	-0.252633	0.516794	1
ENSMUST00000001826	ENSMUSG00000043943	Naalad2	transcript	0	0	NA	1	1
ENSMUST00000001834	ENSMUSG00000001783	Rtcb	transcript	43.0801	39.9104	0.110257	0.790442	1
ENSMUST00000001836	ENSMUSG00000001785	Pwp1	transcript	6.4865	5.91055	0.134148	0.789753	1
ENSMUST00000001845	ENSMUSG00000001794	Capns1	transcript	45.9998	45.1226	0.0277772	0.96021	1
ENSMUST00000001854	ENSMUSG00000030495	Slc7a10	transcript	8.72881	8.69192	0.00611114	0.996232	1
ENSMUST00000001867	ENSMUSG00000001815	Evx2	transcript	0	0.00289833	#NAME?	0.461255	1
ENSMUST00000001872	ENSMUSG00000001819	Hoxd13	transcript	0.00546067	0	Inf	0.46605	1
ENSMUST00000001878	ENSMUSG00000001823	Hoxd12	transcript	0	0	NA	1	1
ENSMUST00000001882	ENSMUSG00000001827	Folr1	transcript	0	0	NA	1	1
ENSMUST00000001884	ENSMUSG00000001829	Clpb	transcript	10.4964	9.80238	0.0986891	0.826889	1
ENSMUST00000001900	ENSMUSG00000001844	Zdhhc4	transcript	1.00837	0.727756	0.470501	0.560006	1
ENSMUST00000001920	ENSMUSG00000001864	Aif1l	transcript	2.01376	2.10918	-0.0667934	0.9006	1
ENSMUST00000001921	ENSMUSG00000001865	Cpa3	transcript	0	0.008383	#NAME?	0.630469	1
ENSMUST00000001927	ENSMUSG00000001870	Ltbp1	transcript	0.243037	0.345945	-0.50937	0.533975	1
ENSMUST00000001950	ENSMUSG00000025139	Tollip	transcript	40.1003	39.7983	0.0109072	0.994473	1
ENSMUST00000001963	ENSMUSG00000020681	Ace	transcript	3.71158	3.68639	0.00982359	1	1
ENSMUST00000001964	ENSMUSG00000020681	Ace	transcript	0.00769467	0.0156557	-1.02475	0.579084	1
ENSMUST00000001965	ENSMUSG00000001901	Kcnh6	transcript	0.731903	0.590068	0.31077	0.680078	1
ENSMUST00000001974	ENSMUSG00000001909	Trmt1	transcript	2.77381	4.80079	-0.791403	0.162943	1
ENSMUST00000001975	ENSMUSG00000001910	Nacc1	transcript	31.1159	31.5709	-0.0209447	0.936168	1
ENSMUST00000001984	ENSMUSG00000007209	Ceacam9	transcript	0.120306	0.052941	1.18425	0.334102	1
ENSMUST00000001989	ENSMUSG00000001924	Uba1	transcript	87.8941	88.7225	-0.013534	0.947605	1
ENSMUST00000001995	ENSMUSG00000001930	Vwf	transcript	3.02874	3.42201	-0.176125	0.678097	1
ENSMUST00000002007	ENSMUSG00000001942	Siae	transcript	5.33634	5.14054	0.0539314	0.923187	1
ENSMUST00000002008	ENSMUSG00000001943	Vsig2	transcript	1.28258	1.17738	0.123469	0.882233	1
ENSMUST00000002011	ENSMUSG00000001946	Esam	transcript	5.02522	5.36183	-0.0935395	0.851375	1
ENSMUST00000002013	ENSMUSG00000001948	Spa17	transcript	0.611846	0.746768	-0.287491	0.73519	1
ENSMUST00000002025	ENSMUSG00000025519	Tktl2	transcript	0	0.00621967	#NAME?	0.631971	1
ENSMUST00000002029	ENSMUSG00000001964	Emd	transcript	11.1932	11.3459	-0.0195426	0.953435	1
ENSMUST00000002043	ENSMUSG00000078622	Ccdc47	transcript	20.5541	19.988	0.0402892	0.931742	1
ENSMUST00000002044	ENSMUSG00000020700	Map3k3	transcript	7.25525	7.49256	-0.0464337	0.900545	1
ENSMUST00000002048	ENSMUSG00000001983	Taco1	transcript	8.36094	7.75157	0.109177	0.84604	1
ENSMUST00000002053	ENSMUSG00000001988	Npas1	transcript	3.44004	3.00956	0.192874	0.75264	1
ENSMUST00000002063	ENSMUSG00000001998	Ap4e1	transcript	2.74678	2.73889	0.00414881	0.99591	1
ENSMUST00000002064	ENSMUSG00000001999	Blvra	transcript	8.82652	8.66392	0.0268242	0.974836	1
ENSMUST00000002073	ENSMUSG00000002020	Ltbp2	transcript	0.0942657	0.0736503	0.35604	0.733848	1
ENSMUST00000002079	ENSMUSG00000031385	Plxnb3	transcript	3.78656	3.35857	0.17304	0.718146	1
ENSMUST00000002080	ENSMUSG00000002006	Pdzd4	transcript	7.02638	7.41074	-0.0768361	0.848262	1
ENSMUST00000002081	ENSMUSG00000002007	Srpk3	transcript	0.786273	0.745582	0.0766639	0.923949	1
ENSMUST00000002084	ENSMUSG00000031378	Abcd1	transcript	2.48576	2.55964	-0.0422528	0.929905	1
ENSMUST00000002087	ENSMUSG00000002012	Pnck	transcript	1.02281	2.68639	-1.39313	0.0863779	1
ENSMUST00000002090	ENSMUSG00000002014	Ssr4	transcript	5.66936	5.35589	0.0820601	0.907265	1
ENSMUST00000002091	ENSMUSG00000002015	Bcap31	transcript	31.4009	30.1899	0.0567427	0.907336	1
ENSMUST00000002095	ENSMUSG00000002028	Kmt2a	transcript	17.936	19.4858	-0.119572	0.705604	1
ENSMUST00000002099	ENSMUSG00000002031	Ift46	transcript	6.32362	6.14377	0.0416278	0.944606	1
ENSMUST00000002100	ENSMUSG00000002032	Tmem25	transcript	0.970904	0.678064	0.517907	0.482982	1
ENSMUST00000002101	ENSMUSG00000002033	Cd3g	transcript	0	0	NA	1	1
ENSMUST00000002112	ENSMUSG00000002043	Trappc6a	transcript	3.70394	3.92379	-0.0831882	0.900079	1
ENSMUST00000002121	ENSMUSG00000002052	Supt6	transcript	32.9877	32.8812	0.00466549	0.991483	1
ENSMUST00000002127	ENSMUSG00000002058	Unc119	transcript	6.10325	6.87764	-0.172335	0.747773	1
ENSMUST00000002128	ENSMUSG00000002059	Rab34	transcript	1.28554	1.38721	-0.109807	0.887334	1
ENSMUST00000002133	ENSMUSG00000002064	Sdf2	transcript	19.8667	20.6138	-0.0532608	0.888618	1
ENSMUST00000002145	ENSMUSG00000002076	Hsf2bp	transcript	0.0577783	0.0909163	-0.654011	0.540126	1
ENSMUST00000002152	ENSMUSG00000002083	Bbc3	transcript	1.83311	1.83803	-0.00386931	0.990391	1
ENSMUST00000002171	ENSMUSG00000002102	Psmc3	transcript	0.0966347	0.053596	0.850416	0.552681	1
ENSMUST00000002172	ENSMUSG00000002103	Acp2	transcript	15.7587	14.6752	0.102768	0.811137	1
ENSMUST00000002176	ENSMUSG00000002107	Celf2	transcript	0.447936	0.660253	-0.559725	0.398203	1
ENSMUST00000002177	ENSMUSG00000002108	Nr1h3	transcript	0.219853	0.225178	-0.0345245	0.987113	1
ENSMUST00000002180	ENSMUSG00000002111	Spi1	transcript	1.2986	0.969849	0.421122	0.570072	1
ENSMUST00000002198	ENSMUSG00000002129	Sf3a1	transcript	15.1698	15.8692	-0.0650224	0.848283	1
ENSMUST00000002259	ENSMUSG00000002190	Clgn	transcript	2.23692	1.87082	0.257842	0.658197	1
ENSMUST00000002274	ENSMUSG00000002204	Napsa	transcript	0.059597	0.0808473	-0.43996	0.759204	1
ENSMUST00000002275	ENSMUSG00000002205	Vrk3	transcript	7.26216	7.05896	0.0409437	0.945732	1
ENSMUST00000002280	ENSMUSG00000002210	Smg9	transcript	9.0252	8.37383	0.108071	0.826435	1
ENSMUST00000002284	ENSMUSG00000046223	Plaur	transcript	0.742329	0.447264	0.73093	0.367051	1
ENSMUST00000002289	ENSMUSG00000022111	Uchl3	transcript	11.7748	12.6914	-0.108149	0.823101	1
ENSMUST00000002291	ENSMUSG00000002221	Paxip1	transcript	7.13179	7.55988	-0.0840982	0.827207	1
ENSMUST00000002292	ENSMUSG00000002222	Rmnd5a	transcript	25.4441	27.7401	-0.124645	0.710021	1
ENSMUST00000002297	ENSMUSG00000002227	Mov10	transcript	0.634584	0.149146	2.08909	0.168987	1
ENSMUST00000002298	ENSMUSG00000002228	Ppm1j	transcript	0.262445	0.125777	1.06115	0.263903	1
ENSMUST00000002303	ENSMUSG00000002233	Rhoc	transcript	5.32135	5.76152	-0.11466	0.836399	1
ENSMUST00000002305	ENSMUSG00000042599	Kdm7a	transcript	15.0621	17.1009	-0.183149	0.592768	1
ENSMUST00000002310	ENSMUSG00000002240	Prr27	transcript	0	0	NA	1	1
ENSMUST00000002318	ENSMUSG00000024220	Zfp523	transcript	0.0254133	0.180255	-2.82638	0.0260104	0.971349
ENSMUST00000002320	ENSMUSG00000002250	Ppard	transcript	6.07467	6.77996	-0.158471	0.713608	1
ENSMUST00000002327	ENSMUSG00000002257	Def6	transcript	0.676196	0.645845	0.0662535	0.943023	1
ENSMUST00000002336	ENSMUSG00000002266	Zim1	transcript	1.08123	1.16061	-0.102206	0.865178	1
ENSMUST00000002344	ENSMUSG00000002274	Metrn	transcript	0.094658	0.133158	-0.492339	0.759381	1
ENSMUST00000002350	ENSMUSG00000002280	Narfl	transcript	7.15362	6.70234	0.0940077	0.855714	1
ENSMUST00000002360	ENSMUSG00000002289	Angptl4	transcript	1.00614	0.930794	0.112293	0.886128	1
ENSMUST00000002368	ENSMUSG00000002297	Dbf4	transcript	0.0965593	0.352178	-1.86682	0.214068	1
ENSMUST00000002379	ENSMUSG00000002308	Cd320	transcript	4.49897	4.01408	0.164526	0.775189	1
ENSMUST00000002389	ENSMUSG00000022218	Tgm1	transcript	0.00288433	0	Inf	0.628618	1
ENSMUST00000002391	ENSMUSG00000002320	Tm9sf1	transcript	3.75562	4.29759	-0.194476	0.705595	1
ENSMUST00000002395	ENSMUSG00000002324	Rec8	transcript	0.134856	0.194056	-0.525053	0.741716	1
ENSMUST00000002397	ENSMUSG00000002326	Gmpr2	transcript	7.54615	6.98184	0.112134	0.840034	1
ENSMUST00000002398	ENSMUSG00000022220	Adcy4	transcript	0.650155	0.968644	-0.575183	0.487685	1
ENSMUST00000002400	ENSMUSG00000002329	Mdp1	transcript	12.5894	11.9311	0.0774818	0.87894	1
ENSMUST00000002403	ENSMUSG00000002332	Dhrs1	transcript	26.0491	22.4178	0.216588	0.622111	1
ENSMUST00000002412	ENSMUSG00000002341	Ncan	transcript	45.1118	44.9186	0.00619261	0.995838	1
ENSMUST00000002413	ENSMUSG00000002342	Tmem161a	transcript	3.96444	5.14546	-0.376182	0.491854	1
ENSMUST00000002418	ENSMUSG00000002345	2310045N01Rik	transcript	6.72923	6.93741	-0.043956	0.936839	1
ENSMUST00000002436	ENSMUSG00000002365	Snx9	transcript	4.90487	4.90566	-0.000232544	0.987144	1
ENSMUST00000002444	ENSMUSG00000024206	Rfx2	transcript	0.340484	0.243385	0.484346	0.782682	1
ENSMUST00000002445	ENSMUSG00000002372	Ranbp3	transcript	21.3531	21.1105	0.0164806	0.984184	1
ENSMUST00000002452	ENSMUSG00000002379	Ndufa11	transcript	13.5896	14.1231	-0.0555497	0.880588	1
ENSMUST00000002456	ENSMUSG00000020622	Nt5c1b	transcript	0	0	NA	1	1
ENSMUST00000002457	ENSMUSG00000002384	Bmp8b	transcript	0.0316427	0.0168963	0.905161	0.463786	1
ENSMUST00000002466	ENSMUSG00000002393	Nr2f6	transcript	10.6122	11.0532	-0.0587304	0.881144	1
ENSMUST00000002469	ENSMUSG00000002396	Ocel1	transcript	1.05951	1.41258	-0.414938	0.571895	1
ENSMUST00000002473	ENSMUSG00000031820	Babam1	transcript	26.6658	25.4367	0.068082	0.887146	1
ENSMUST00000002487	ENSMUSG00000002413	Braf	transcript	25.4064	25.9234	-0.0290619	0.913303	1
ENSMUST00000002495	ENSMUSG00000041420	Meis3	transcript	7.9031	6.6935	0.239658	0.643233	1
ENSMUST00000002502	ENSMUSG00000002428	Hltf	transcript	6.76156	6.87213	-0.0234013	0.940935	1
ENSMUST00000002518	ENSMUSG00000054452	Aes	transcript	205.116	205.365	-0.00174807	0.97775	1
ENSMUST00000002529	ENSMUSG00000002455	Prpf6	transcript	19.6421	19.0671	0.0428641	0.93157	1
ENSMUST00000002532	ENSMUSG00000002458	Rgs19	transcript	0.617422	0.459879	0.425002	0.630422	1
ENSMUST00000002533	ENSMUSG00000002459	Rgs20	transcript	8.53262	8.75272	-0.036742	0.926207	1
ENSMUST00000002549	ENSMUSG00000002475	Abhd3	transcript	15.4504	17.8726	-0.210103	0.621664	1
ENSMUST00000002551	ENSMUSG00000002477	Snrpd1	transcript	20.9914	21.9883	-0.0669358	0.872741	1
ENSMUST00000002572	ENSMUSG00000002504	Slc9a3r2	transcript	10.8579	10.0978	0.104702	0.832375	1
ENSMUST00000002588	ENSMUSG00000002489	Tiam1	transcript	13.6758	15.0922	-0.142176	0.696106	1
ENSMUST00000002599	ENSMUSG00000002524	Puf60	transcript	16.5685	18.605	-0.167249	0.688003	1
ENSMUST00000002603	ENSMUSG00000022568	Scrib	transcript	5.63292	5.19974	0.115445	0.810416	1
ENSMUST00000002625	ENSMUSG00000002550	Uck1	transcript	11.2473	11.5004	-0.0320974	0.92964	1
ENSMUST00000002640	ENSMUSG00000002565	Scin	transcript	0.065839	0.0695987	-0.0801172	1	1
ENSMUST00000002655	ENSMUSG00000002580	Mien1	transcript	26.9485	29.3338	-0.122356	0.774295	1
ENSMUST00000002663	ENSMUSG00000002588	Pon1	transcript	0.01215	0.0366883	-1.59437	0.439479	1
ENSMUST00000002677	ENSMUSG00000002602	Axl	transcript	10.9868	10.2844	0.0953083	0.834127	1
ENSMUST00000002678	ENSMUSG00000002603	Tgfb1	transcript	3.03375	2.24306	0.435634	0.476665	1
ENSMUST00000002683	ENSMUSG00000002608	Ccdc97	transcript	13.1162	13.2312	-0.0125923	0.960352	1
ENSMUST00000002699	ENSMUSG00000024045	Akap8	transcript	10.6487	10.4558	0.02637	0.966313	1
ENSMUST00000002708	ENSMUSG00000002633	Shh	transcript	1.29318	1.29355	-0.000405283	0.993788	1
ENSMUST00000002710	ENSMUSG00000002635	Pdcd2l	transcript	8.2224	8.31425	-0.0160272	0.963976	1
ENSMUST00000002733	ENSMUSG00000002658	Gtf2f1	transcript	18.8344	19.3189	-0.0366488	0.916858	1
ENSMUST00000002735	ENSMUSG00000002660	Clpp	transcript	18.2003	18.2267	-0.00209332	0.980941	1
ENSMUST00000002737	ENSMUSG00000002661	Alkbh7	transcript	7.88274	7.21512	0.127673	0.839842	1
ENSMUST00000002740	ENSMUSG00000002664	Pspn	transcript	0.076415	0.0140423	2.44407	0.460915	1
ENSMUST00000002756	ENSMUSG00000002679	Med6	transcript	9.0283	9.11961	-0.0145182	0.967721	1
ENSMUST00000002757	ENSMUSG00000091803	Cox16	transcript	1.62874	1.75135	-0.104712	0.868283	1
ENSMUST00000002765	ENSMUSG00000002688	Prkd1	transcript	3.60749	3.47238	0.0550707	0.925281	1
ENSMUST00000002790	ENSMUSG00000002718	Cse1l	transcript	21.2065	20.2995	0.0630598	0.887933	1
ENSMUST00000002805	ENSMUSG00000002728	Naa20	transcript	3.57058	2.33923	0.610126	0.378618	1
ENSMUST00000002808	ENSMUSG00000002731	Prkra	transcript	6.85959	6.1395	0.160001	0.775091	1
ENSMUST00000002809	ENSMUSG00000002732	Fkbp7	transcript	1.44213	1.3836	0.0597669	0.954127	1
ENSMUST00000002817	ENSMUSG00000057897	Camk2b	transcript	10.4925	7.69136	0.448048	0.41951	1
ENSMUST00000002818	ENSMUSG00000002741	Ykt6	transcript	23.2085	23.7505	-0.0333025	0.917937	1
ENSMUST00000002825	ENSMUSG00000002748	Baz1b	transcript	23.8253	24.9287	-0.0653175	0.836224	1
ENSMUST00000002837	ENSMUSG00000063406	Tmed5	transcript	9.33189	9.2753	0.00877649	0.998906	1
ENSMUST00000002839	ENSMUSG00000059409	Ppp2r5d	transcript	27.7971	28.2575	-0.0236996	0.932983	1
ENSMUST00000002840	ENSMUSG00000002763	Pex6	transcript	15.2995	16.1962	-0.0821647	0.82682	1
ENSMUST00000002844	ENSMUSG00000002767	Mrpl2	transcript	4.3223	4.55487	-0.0756115	0.896396	1
ENSMUST00000002845	ENSMUSG00000002768	Mea1	transcript	27.2704	30.1075	-0.142787	0.736871	1
ENSMUST00000002846	ENSMUSG00000002769	Gnmt	transcript	0.184902	0.174877	0.0804204	0.964749	1
ENSMUST00000002848	ENSMUSG00000002771	Grin2d	transcript	3.88046	3.51943	0.140886	0.772741	1
ENSMUST00000002850	ENSMUSG00000030834	Abcc6	transcript	0.179962	0.190043	-0.0786311	0.931854	1
ENSMUST00000002855	ENSMUSG00000002778	Kdelr1	transcript	13.9717	8.66931	0.688516	0.146502	1
ENSMUST00000002880	ENSMUSG00000002803	Btbd6	transcript	18.6516	18.2205	0.0337358	0.952621	1
ENSMUST00000002881	ENSMUSG00000002804	Nudt14	transcript	3.7515	3.46142	0.116104	0.875821	1
ENSMUST00000002883	ENSMUSG00000021319	Sfrp4	transcript	0.542791	0.474528	0.193903	0.834145	1
ENSMUST00000002885	ENSMUSG00000002808	Epdr1	transcript	44.9328	41.604	0.111045	0.783414	1
ENSMUST00000002889	ENSMUSG00000002812	Flii	transcript	12.9195	13.2587	-0.0373843	0.90888	1
ENSMUST00000002891	ENSMUSG00000002814	Top3a	transcript	1.17527	0.872699	0.429432	0.523985	1
ENSMUST00000002902	ENSMUSG00000002825	Qtrt1	transcript	4.20327	3.70079	0.183679	0.775244	1
ENSMUST00000002908	ENSMUSG00000002831	Plin4	transcript	7.86856	2.37769	1.72654	0.000390576	0.0698339
ENSMUST00000002911	ENSMUSG00000002833	Hdgfrp2	transcript	19.2278	19.8402	-0.0452277	0.89736	1
ENSMUST00000002914	ENSMUSG00000002835	Chaf1a	transcript	1.21769	1.07204	0.183797	0.782275	1
ENSMUST00000002923	ENSMUSG00000002844	Adprh	transcript	36.6041	35.7516	0.0339957	0.949325	1
ENSMUST00000002924	ENSMUSG00000002845	Tmem39a	transcript	2.03121	1.98767	0.0312592	0.977457	1
ENSMUST00000002925	ENSMUSG00000002846	Timmdc1	transcript	10.9042	10.9746	-0.00928066	0.970676	1
ENSMUST00000002926	ENSMUSG00000002847	Pla1a	transcript	0.482834	0.40251	0.262503	0.759738	1
ENSMUST00000002964	ENSMUSG00000002885	Cd97	transcript	0.21294	0.289009	-0.440665	0.680592	1
ENSMUST00000002976	ENSMUSG00000002897	Il17ra	transcript	4.6829	4.34859	0.106857	0.830059	1
ENSMUST00000002979	ENSMUSG00000002900	Lamb1	transcript	3.55196	4.44845	-0.324686	0.491447	1
ENSMUST00000002989	ENSMUSG00000002910	Arrdc2	transcript	6.65549	4.72155	0.495283	0.369262	1
ENSMUST00000003017	ENSMUSG00000029925	Tbxas1	transcript	0.958295	0.794466	0.270484	0.724355	1
ENSMUST00000003027	ENSMUSG00000002948	Map2k7	transcript	0.930092	1.02943	-0.146406	0.847548	1
ENSMUST00000003029	ENSMUSG00000002949	Timm44	transcript	11.2433	12.0712	-0.10251	0.810411	1
ENSMUST00000003035	ENSMUSG00000030768	Disp1	transcript	0.844876	0.834335	0.0181134	0.990676	1
ENSMUST00000003038	ENSMUSG00000002957	Ap2a2	transcript	67.233	67.6261	-0.00841051	0.960665	1
ENSMUST00000003044	ENSMUSG00000002963	Pnkp	transcript	2.4577	3.52334	-0.519634	0.409889	1
ENSMUST00000003049	ENSMUSG00000002968	Med25	transcript	21.5098	20.3689	0.078631	0.863914	1
ENSMUST00000003061	ENSMUSG00000002980	Bcam	transcript	6.4092	6.41821	-0.00202693	0.98307	1
ENSMUST00000003066	ENSMUSG00000002985	Apoe	transcript	0.921405	13.9299	-3.9182	0.15085	1
ENSMUST00000003071	ENSMUSG00000074336	Apoc4	transcript	0.0526413	0	Inf	0.137391	1
ENSMUST00000003074	ENSMUSG00000002992	Apoc2	transcript	0	0	NA	1	1
ENSMUST00000003079	ENSMUSG00000002997	Prkar2b	transcript	4.06775	4.17621	-0.0379651	0.949162	1
ENSMUST00000003100	ENSMUSG00000052974	Cyp2f2	transcript	0.323015	0.079553	2.02161	0.0714365	1
ENSMUST00000003115	ENSMUSG00000003031	Cdkn1b	transcript	9.79677	11.0998	-0.180158	0.670123	1
ENSMUST00000003117	ENSMUSG00000003033	Ap1m1	transcript	17.9052	17.8911	0.00113058	0.985545	1
ENSMUST00000003121	ENSMUSG00000003037	Rab8a	transcript	6.05645	6.14328	-0.0205367	0.947104	1
ENSMUST00000003123	ENSMUSG00000003039	Fam32a	transcript	25.3233	26.2593	-0.052367	0.882933	1
ENSMUST00000003135	ENSMUSG00000003051	Elf3	transcript	0.0599633	0.0213173	1.49205	0.303727	1
ENSMUST00000003137	ENSMUSG00000003053	Cyp2c29	transcript	0	0	NA	1	1
ENSMUST00000003152	ENSMUSG00000003068	Stk11	transcript	20.9202	21.7328	-0.0549757	0.878141	1
ENSMUST00000003154	ENSMUSG00000003070	Efna2	transcript	2.21137	2.3213	-0.0699983	0.90169	1
ENSMUST00000003156	ENSMUSG00000003072	Atp5d	transcript	2.01321	1.75625	0.196999	0.835357	1
ENSMUST00000003183	ENSMUSG00000003099	Ppp5c	transcript	40.4396	39.153	0.0466459	0.919861	1
ENSMUST00000003191	ENSMUSG00000024070	Prkd3	transcript	0	1.66588	#NAME?	1.42369e-06	0.000897994
ENSMUST00000003203	ENSMUSG00000003119	Cdk12	transcript	0.658513	0.399513	0.720969	0.322428	1
ENSMUST00000003207	ENSMUSG00000003123	Lipe	transcript	2.67653	2.39253	0.161829	0.799508	1
ENSMUST00000003219	ENSMUSG00000003135	Cnot11	transcript	8.92381	9.07709	-0.0245714	0.940188	1
ENSMUST00000003238	ENSMUSG00000003154	Foxj2	transcript	7.78824	8.52045	-0.129633	0.739814	1
ENSMUST00000003268	ENSMUSG00000003200	Sh3gl1	transcript	11.0436	10.8321	0.0278871	0.96654	1
ENSMUST00000003274	ENSMUSG00000003206	Ebi3	transcript	0.449612	0.355586	0.33848	0.747555	1
ENSMUST00000003284	ENSMUSG00000003184	Irf3	transcript	2.33135	2.60271	-0.158853	0.789875	1
ENSMUST00000003290	ENSMUSG00000003190	Bcl2l12	transcript	0.725118	0.785845	-0.116029	0.885536	1
ENSMUST00000003310	ENSMUSG00000003226	Ranbp2	transcript	35.5033	37.3114	-0.0716623	0.812033	1
ENSMUST00000003312	ENSMUSG00000003227	Edar	transcript	0.093841	0.054846	0.774832	0.517869	1
ENSMUST00000003313	ENSMUSG00000003228	Grk5	transcript	5.95318	6.35664	-0.0946029	0.822293	1
ENSMUST00000003318	ENSMUSG00000003233	Dvl3	transcript	0.97752	1.2452	-0.349177	0.614438	1
ENSMUST00000003319	ENSMUSG00000003234	Abcf3	transcript	16.5064	16.8374	-0.028649	0.928365	1
ENSMUST00000003320	ENSMUSG00000003235	Eif2b5	transcript	13.6864	13.9769	-0.0303081	0.926824	1
ENSMUST00000003345	ENSMUSG00000021314	Amph	transcript	60.8139	61.0314	-0.00514868	0.96934	1
ENSMUST00000003351	ENSMUSG00000020734	Grin2c	transcript	2.08274	2.05288	0.0208283	0.995238	1
ENSMUST00000003360	ENSMUSG00000003273	Car11	transcript	50.4189	47.0737	0.0990423	0.814117	1
ENSMUST00000003369	ENSMUSG00000003282	Plag1	transcript	1.2196	1.31282	-0.106256	0.846792	1
ENSMUST00000003370	ENSMUSG00000003283	Hck	transcript	0.218835	0.178872	0.290918	0.740404	1
ENSMUST00000003386	ENSMUSG00000003299	Mrpl4	transcript	18.1093	17.6238	0.0392029	0.944942	1
ENSMUST00000003395	ENSMUSG00000032177	Pde4a	transcript	4.96535	4.92837	0.0107857	0.996224	1
ENSMUST00000003397	ENSMUSG00000003309	Ap1m2	transcript	0.389308	0.200436	0.957772	0.438946	1
ENSMUST00000003404	ENSMUSG00000003316	Glg1	transcript	0	0	NA	1	1
ENSMUST00000003413	ENSMUSG00000061126	Cyp4f39	transcript	0	0	NA	1	1
ENSMUST00000003416	ENSMUSG00000048440	Cyp4f16	transcript	0.654925	0.788752	-0.268243	0.726005	1
ENSMUST00000003433	ENSMUSG00000020190	Mknk2	transcript	13.0154	13.5206	-0.0549399	0.879838	1
ENSMUST00000003434	ENSMUSG00000003344	Btbd2	transcript	7.12866	7.87569	-0.143776	0.755385	1
ENSMUST00000003436	ENSMUSG00000003346	Abhd17a	transcript	49.5359	47.5221	0.059876	0.899319	1
ENSMUST00000003438	ENSMUSG00000003348	Mob3a	transcript	3.86622	3.69585	0.0650197	0.917038	1
ENSMUST00000003442	ENSMUSG00000003352	Cacnb3	transcript	44.6071	52.6431	-0.238972	0.497785	1
ENSMUST00000003444	ENSMUSG00000003354	Ccdc65	transcript	2.91452	2.9149	-0.000186604	0.991362	1
ENSMUST00000003445	ENSMUSG00000003355	Fkbp11	transcript	0.965497	0.686323	0.492384	0.581006	1
ENSMUST00000003450	ENSMUSG00000003360	Ddx23	transcript	20.1335	20.095	0.00276508	0.989201	1
ENSMUST00000003451	ENSMUSG00000054855	Rnd1	transcript	6.84781	8.17376	-0.255357	0.571787	1
ENSMUST00000003459	ENSMUSG00000020437	Myo1g	transcript	0.127189	0.062881	1.01627	0.258805	1
ENSMUST00000003461	ENSMUSG00000020456	Ogdh	transcript	24.2791	26.499	-0.126218	0.72381	1
ENSMUST00000003468	ENSMUSG00000003378	Grik5	transcript	53.5999	52.0797	0.0415084	0.925221	1
ENSMUST00000003469	ENSMUSG00000003379	Cd79a	transcript	0.0961647	0.0432133	1.15403	0.397151	1
ENSMUST00000003493	ENSMUSG00000003402	Prkcsh	transcript	10.9628	9.99245	0.133707	0.784237	1
ENSMUST00000003501	ENSMUSG00000003410	Elavl3	transcript	41.7939	44.0061	-0.0744092	0.814309	1
ENSMUST00000003502	ENSMUSG00000003411	Rab3b	transcript	2.93096	5.68912	-0.956829	0.130463	1
ENSMUST00000003509	ENSMUSG00000003418	St8sia6	transcript	1.07457	0.791159	0.44172	0.458525	1
ENSMUST00000003512	ENSMUSG00000003420	Fcgrt	transcript	6.90805	5.98709	0.206424	0.702567	1
ENSMUST00000003513	ENSMUSG00000003421	Nosip	transcript	9.01068	8.71692	0.0478182	0.93224	1
ENSMUST00000003521	ENSMUSG00000003429	Rps11	transcript	160.987	157.767	0.0291496	0.955346	1
ENSMUST00000003527	ENSMUSG00000003435	Supt5	transcript	33.8887	32.7776	0.0480934	0.913112	1
ENSMUST00000003529	ENSMUSG00000003437	Paf1	transcript	16.6135	15.8873	0.0644823	0.89547	1
ENSMUST00000003536	ENSMUSG00000003444	Med29	transcript	5.47012	6.32351	-0.209153	0.702237	1
ENSMUST00000003544	ENSMUSG00000003452	Bicd1	transcript	0.763678	0.64152	0.251469	0.753028	1
ENSMUST00000003550	ENSMUSG00000003458	Ncstn	transcript	16.62	16.9257	-0.0262964	0.933697	1
ENSMUST00000003554	ENSMUSG00000007122	Casq1	transcript	0.192317	0.137175	0.487465	0.612045	1
ENSMUST00000003561	ENSMUSG00000003469	Phyhip	transcript	157.616	150.57	0.0659842	0.864159	1
ENSMUST00000003568	ENSMUSG00000003476	Crhr2	transcript	0.444223	0.436082	0.0266825	1	1
ENSMUST00000003569	ENSMUSG00000003477	Inmt	transcript	0.758041	0.618033	0.294592	0.772119	1
ENSMUST00000003572	ENSMUSG00000029777	Gars	transcript	41.2729	42.1412	-0.0300366	0.91982	1
ENSMUST00000003574	ENSMUSG00000003484	Cyp4f18	transcript	0.025301	0.0230097	0.136954	1	1
ENSMUST00000003575	ENSMUSG00000031799	Tpm4	transcript	9.95588	10.046	-0.0130008	0.961911	1
ENSMUST00000003597	ENSMUSG00000003505	Psg18	transcript	0	0	NA	1	1
ENSMUST00000003599	ENSMUSG00000103088	Pcdhgb6	transcript	4.6791	4.41401	0.0841394	0.869289	1
ENSMUST00000003612	ENSMUSG00000003518	Dusp3	transcript	22.412	30.3291	-0.436432	0.254544	1
ENSMUST00000003620	ENSMUSG00000003526	Prodh	transcript	9.19018	8.05805	0.189662	0.693069	1
ENSMUST00000003621	ENSMUSG00000003527	Dgcr14	transcript	6.58098	6.79817	-0.0468428	0.904019	1
ENSMUST00000003622	ENSMUSG00000003528	Slc25a1	transcript	12.1219	10.7521	0.173004	0.717557	1
ENSMUST00000003628	ENSMUSG00000003534	Ddr1	transcript	1.85438	6.59716	-1.83091	0.00131441	0.14824
ENSMUST00000003635	ENSMUSG00000003541	Ier3	transcript	5.02874	5.47846	-0.123574	0.823347	1
ENSMUST00000003640	ENSMUSG00000003545	Fosb	transcript	4.33125	5.7619	-0.411762	0.364999	1
ENSMUST00000003642	ENSMUSG00000003546	Klc4	transcript	6.11642	6.40732	-0.067034	0.874785	1
ENSMUST00000003643	ENSMUSG00000030399	Ckm	transcript	0.0236683	0.052012	-1.13589	0.468132	1
ENSMUST00000003645	ENSMUSG00000003549	Ercc1	transcript	5.86143	6.31384	-0.107265	0.83655	1
ENSMUST00000003655	ENSMUSG00000003559	As3mt	transcript	4.22975	4.09301	0.047412	0.948492	1
ENSMUST00000003659	ENSMUSG00000031849	Comp	transcript	0.150548	0.108016	0.478982	0.631547	1
ENSMUST00000003669	ENSMUSG00000003573	Homer3	transcript	4.67148	4.30099	0.11921	0.835893	1
ENSMUST00000003677	ENSMUSG00000003581	Rnf215	transcript	6.94446	7.19755	-0.0516424	0.904683	1
ENSMUST00000003681	ENSMUSG00000003585	Sec14l2	transcript	12.7344	13.033	-0.0334452	0.923864	1
ENSMUST00000003687	ENSMUSG00000021253	Tgfb3	transcript	4.85018	5.6591	-0.222536	0.617242	1
ENSMUST00000003705	ENSMUSG00000003604	Aven	transcript	1.32539	1.37325	-0.0511776	0.923218	1
ENSMUST00000003710	ENSMUSG00000057230	Aak1	transcript	4.3629	4.34785	0.00498424	0.989681	1
ENSMUST00000003714	ENSMUSG00000003617	Cp	transcript	0.576028	0.542028	0.0877698	0.920659	1
ENSMUST00000003717	ENSMUSG00000042476	Abcb4	transcript	1.24799	1.16906	0.0942509	0.891397	1
ENSMUST00000003720	ENSMUSG00000003623	Crot	transcript	11.2538	10.969	0.0369783	0.947826	1
ENSMUST00000003726	ENSMUSG00000024002	Brd4	transcript	0.300881	0.286879	0.0687506	0.947946	1
ENSMUST00000003741	ENSMUSG00000003644	Rps6ka1	transcript	0	0.332967	#NAME?	0.00275067	0.22975
ENSMUST00000003754	ENSMUSG00000003657	Calb2	transcript	19.3294	19.4848	-0.0115502	0.961826	1
ENSMUST00000003759	ENSMUSG00000003662	Ciao1	transcript	10.9409	10.8301	0.014694	0.987655	1
ENSMUST00000003762	ENSMUSG00000003665	Has1	transcript	0.34863	0.501917	-0.525753	0.521689	1
ENSMUST00000003777	ENSMUSG00000003680	Taf6l	transcript	1.39386	1.52348	-0.128289	0.861459	1
ENSMUST00000003808	ENSMUSG00000038508	Gdf15	transcript	0.0888617	0.0792247	0.165612	0.956508	1
ENSMUST00000003818	ENSMUSG00000003721	Insig2	transcript	13.743	13.8284	-0.00893405	0.96683	1
ENSMUST00000003826	ENSMUSG00000032269	Htr3a	transcript	2.32223	2.06893	0.166631	0.807994	1
ENSMUST00000003828	ENSMUSG00000003731	Kpna6	transcript	0.008846	0.121318	-3.77762	0.0938191	1
ENSMUST00000003843	ENSMUSG00000003746	Man1a	transcript	9.73225	10.0408	-0.0450263	0.896222	1
ENSMUST00000003850	ENSMUSG00000003752	Itpkc	transcript	2.60033	3.00589	-0.209101	0.689703	1
ENSMUST00000003857	ENSMUSG00000089832	Shkbp1	transcript	2.08861	2.00686	0.057601	0.937441	1
ENSMUST00000003860	ENSMUSG00000003762	Adck4	transcript	1.98554	2.54462	-0.357922	0.593658	1
ENSMUST00000003870	ENSMUSG00000025025	Mxi1	transcript	3.47027	2.93701	0.240701	0.658523	1
ENSMUST00000003876	ENSMUSG00000003778	Brd8	transcript	3.9634	6.66842	-0.750606	0.399008	1
ENSMUST00000003898	ENSMUSG00000022842	Ece2	transcript	0.739147	1.5871	-1.10246	0.120205	1
ENSMUST00000003906	ENSMUSG00000003808	Farsa	transcript	10.6888	5.56978	0.940406	0.0674268	1
ENSMUST00000003907	ENSMUSG00000003809	Gcdh	transcript	3.3346	2.52209	0.402899	0.559105	1
ENSMUST00000003908	ENSMUSG00000003810	Mast2	transcript	0.198842	0.10443	0.929091	0.457704	1
ENSMUST00000003910	ENSMUSG00000003812	Dnase2a	transcript	1.60242	1.21529	0.398961	0.579942	1
ENSMUST00000003911	ENSMUSG00000003813	Rad23a	transcript	15.4872	12.8055	0.27431	0.542942	1
ENSMUST00000003912	ENSMUSG00000003814	Calr	transcript	124.755	146.582	-0.232616	0.484487	1
ENSMUST00000003946	ENSMUSG00000003848	Nob1	transcript	9.05734	8.84628	0.0340166	0.956854	1
ENSMUST00000003947	ENSMUSG00000003849	Nqo1	transcript	2.3418	2.12662	0.139059	0.843959	1
ENSMUST00000003961	ENSMUSG00000003863	Ppfia3	transcript	35.5963	36.9793	-0.0549918	0.861073	1
ENSMUST00000003964	ENSMUSG00000003865	Gys1	transcript	4.38125	4.55728	-0.0568305	0.888221	1
ENSMUST00000003971	ENSMUSG00000003872	Lin7b	transcript	33.2675	33.6131	-0.0149091	0.96151	1
ENSMUST00000003981	ENSMUSG00000003882	Il7r	transcript	0.223906	0.157338	0.509024	0.585363	1
ENSMUST00000004036	ENSMUSG00000003934	Efnb3	transcript	32.1528	30.098	0.0952799	0.817315	1
ENSMUST00000004050	ENSMUSG00000003948	Mmd	transcript	77.8965	77.4678	0.00796269	0.999358	1
ENSMUST00000004051	ENSMUSG00000003949	Hlf	transcript	43.0336	46.1135	-0.0997271	0.755403	1
ENSMUST00000004054	ENSMUSG00000022905	Kpna1	transcript	38.1394	39.3172	-0.0438812	0.883482	1
ENSMUST00000004055	ENSMUSG00000042156	Dzip1	transcript	11.3837	14.3201	-0.331077	0.408847	1
ENSMUST00000004057	ENSMUSG00000003955	Fam162a	transcript	20.1427	20.0957	0.00337536	0.993224	1
ENSMUST00000004072	ENSMUSG00000003970	Rpl8	transcript	172.622	171.868	0.00631724	0.995808	1
ENSMUST00000004076	ENSMUSG00000003974	Grm3	transcript	37.8117	38.555	-0.0280839	0.919344	1
ENSMUST00000004094	ENSMUSG00000003992	Ssbp2	transcript	18.1754	17.833	0.027438	0.961537	1
ENSMUST00000004097	ENSMUSG00000029705	Cux1	transcript	1.83351	2.0564	-0.16551	0.693393	1
ENSMUST00000004120	ENSMUSG00000004018	Fancl	transcript	1.84631	1.69591	0.122582	0.84821	1
ENSMUST00000004133	ENSMUSG00000004031	Brinp2	transcript	24.9951	24.6398	0.0206529	0.971588	1
ENSMUST00000004134	ENSMUSG00000004032	Gstm5	transcript	83.8904	76.7145	0.129008	0.756598	1
ENSMUST00000004136	ENSMUSG00000004038	Gstm3	transcript	0.0326627	0.0366243	-0.16516	1	1
ENSMUST00000004137	ENSMUSG00000004035	Gstm7	transcript	7.42637	6.76697	0.134146	0.815238	1
ENSMUST00000004140	ENSMUSG00000058135	Gstm1	transcript	59.4365	69.5552	-0.226808	0.55718	1
ENSMUST00000004143	ENSMUSG00000020919	Stat5b	transcript	8.56627	8.05721	0.0883875	0.850471	1
ENSMUST00000004145	ENSMUSG00000004043	Stat5a	transcript	0.599306	0.432104	0.471913	0.578779	1
ENSMUST00000004156	ENSMUSG00000004054	Map3k11	transcript	6.41878	6.30538	0.0257167	0.969105	1
ENSMUST00000004172	ENSMUSG00000004070	Hmox2	transcript	8.34253	6.74471	0.30673	0.565585	1
ENSMUST00000004173	ENSMUSG00000004071	Cdip1	transcript	17.7591	14.551	0.287445	0.592793	1
ENSMUST00000004200	ENSMUSG00000004096	Cwc15	transcript	20.3723	22.0909	-0.116847	0.780175	1
ENSMUST00000004201	ENSMUSG00000004098	Col5a3	transcript	0.326743	0.309324	0.0790391	0.928926	1
ENSMUST00000004202	ENSMUSG00000004099	Dnmt1	transcript	9.48173	9.03035	0.0703683	0.885202	1
ENSMUST00000004203	ENSMUSG00000004100	Ppan	transcript	5.00393	4.77556	0.0673933	0.915883	1
ENSMUST00000004206	ENSMUSG00000070319	Eif3g	transcript	32.0403	31.8814	0.00717123	1	1
ENSMUST00000004208	ENSMUSG00000004105	Angptl2	transcript	1.19191	1.28068	-0.103641	0.861475	1
ENSMUST00000004214	ENSMUSG00000004110	Cacna1e	transcript	0.000351	0.000295667	0.247499	1	1
ENSMUST00000004222	ENSMUSG00000022702	Hira	transcript	13.0829	13.4198	-0.0366878	0.911426	1
ENSMUST00000004232	ENSMUSG00000074207	Adh1	transcript	0.164756	0.182895	-0.150679	0.883123	1
ENSMUST00000004281	ENSMUSG00000028630	Dyrk2	transcript	13.7123	15.5528	-0.181702	0.659464	1
ENSMUST00000004294	ENSMUSG00000004187	Kifc2	transcript	84.2425	85.311	-0.0181844	0.939852	1
ENSMUST00000004316	ENSMUSG00000004207	Psap	transcript	8.03689	7.48742	0.102169	0.837241	1
ENSMUST00000004326	ENSMUSG00000031398	Plxna3	transcript	3.70266	3.39909	0.12341	0.793629	1
ENSMUST00000004327	ENSMUSG00000031400	G6pdx	transcript	10.5934	9.99032	0.0845683	0.861553	1
ENSMUST00000004330	ENSMUSG00000004221	Ikbkg	transcript	0.671108	0	Inf	0.000411793	0.0715534
ENSMUST00000004340	ENSMUSG00000004231	Pax2	transcript	0.0304153	0.0133513	1.18781	0.685449	1
ENSMUST00000004343	ENSMUSG00000004233	Wars2	transcript	2.65619	2.33007	0.188981	0.728253	1
ENSMUST00000004375	ENSMUSG00000004264	Phb2	transcript	27.9693	25.9097	0.110352	0.809418	1
ENSMUST00000004377	ENSMUSG00000004266	Ptpn6	transcript	0.0841247	0.007937	3.40586	0.233186	1
ENSMUST00000004378	ENSMUSG00000004267	Eno2	transcript	266.988	247.168	0.111282	0.758958	1
ENSMUST00000004379	ENSMUSG00000004268	Emg1	transcript	13.9059	14.1045	-0.0204623	0.954955	1
ENSMUST00000004381	ENSMUSG00000004270	Lpcat3	transcript	4.40998	4.08257	0.111292	0.849706	1
ENSMUST00000004389	ENSMUSG00000072772	Grcc10	transcript	56.3823	55.5065	0.022585	0.971616	1
ENSMUST00000004392	ENSMUSG00000029771	Irf5	transcript	0	0.815896	#NAME?	3.13693e-05	0.0119194
ENSMUST00000004396	ENSMUSG00000004285	Atp6v1f	transcript	67.596	67.0951	0.0107305	0.994733	1
ENSMUST00000004428	ENSMUSG00000004317	Clcn5	transcript	3.0108	2.63525	0.19221	0.689694	1
ENSMUST00000004430	ENSMUSG00000004319	Clcn3	transcript	1.6381	1.19574	0.454125	0.520277	1
ENSMUST00000004453	ENSMUSG00000004341	Gpx6	transcript	0.279716	0.310351	-0.14994	0.880748	1
ENSMUST00000004456	ENSMUSG00000004344	Gpx5	transcript	0	0	NA	1	1
ENSMUST00000004470	ENSMUSG00000004356	Utp20	transcript	4.2426	4.04014	0.070543	0.882382	1
ENSMUST00000004473	ENSMUSG00000004359	Spic	transcript	0.023072	0.0127217	0.858855	0.921805	1
ENSMUST00000004480	ENSMUSG00000004366	Sst	transcript	137.862	140.017	-0.0223746	0.936704	1
ENSMUST00000004494	ENSMUSG00000031622	Sin3b	transcript	19.6173	21.6841	-0.144512	0.689921	1
ENSMUST00000004497	ENSMUSG00000004383	Large	transcript	6.63685	7.05944	-0.0890566	0.830051	1
ENSMUST00000004505	ENSMUSG00000020447	Npc1l1	transcript	0.322677	0.308735	0.0637218	0.953135	1
ENSMUST00000004507	ENSMUSG00000004393	Ddx56	transcript	11.76	11.1884	0.0718776	0.888091	1
ENSMUST00000004508	ENSMUSG00000004394	Tmed4	transcript	21.3441	21.7596	-0.027815	0.931725	1
ENSMUST00000004554	ENSMUSG00000012848	Rps5	transcript	132.56	132.433	0.00138154	0.985815	1
ENSMUST00000004560	ENSMUSG00000004446	Bid	transcript	2.67198	2.22764	0.262394	0.68359	1
ENSMUST00000004565	ENSMUSG00000004451	Ralb	transcript	7.86806	8.02508	-0.0285087	0.937168	1
ENSMUST00000004574	ENSMUSG00000004460	Dnajb11	transcript	17.6386	21.2139	-0.266278	0.518902	1
ENSMUST00000004576	ENSMUSG00000004462	Tbccd1	transcript	3.82291	3.5297	0.115128	0.841061	1
ENSMUST00000004587	ENSMUSG00000004473	Clec11a	transcript	1.59888	1.70881	-0.0959292	0.880811	1
ENSMUST00000004614	ENSMUSG00000058638	Zfp110	transcript	3.0106	2.28841	0.395707	0.472323	1
ENSMUST00000004622	ENSMUSG00000004508	Gab2	transcript	5.16675	4.85964	0.0884076	0.853843	1
ENSMUST00000004634	ENSMUSG00000020142	Slc1a4	transcript	15.3374	15.6979	-0.0335108	0.916276	1
ENSMUST00000004646	ENSMUSG00000004530	Coro1c	transcript	23.8508	23.1478	0.0431658	0.928007	1
ENSMUST00000004655	ENSMUSG00000004540	Psg17	transcript	0.00641333	0.00578433	0.148924	1	1
ENSMUST00000004657	ENSMUSG00000004542	Psg19	transcript	0	0	NA	1	1
ENSMUST00000004673	ENSMUSG00000004558	Ndrg2	transcript	79.0944	88.3338	-0.15939	0.642116	1
ENSMUST00000004681	ENSMUSG00000004565	Pnpla6	transcript	6.1715	7.1014	-0.202482	0.65095	1
ENSMUST00000004683	ENSMUSG00000004567	Mcoln1	transcript	18.9302	18.3626	0.0439176	0.93329	1
ENSMUST00000004684	ENSMUSG00000004568	Arhgef18	transcript	13.2564	13.3398	-0.00905198	0.964068	1
ENSMUST00000004686	ENSMUSG00000069633	Pex11g	transcript	0.231494	0.153704	0.590822	0.512248	1
ENSMUST00000004715	ENSMUSG00000061778	Mospd2	transcript	5.01682	4.29602	0.223771	0.719374	1
ENSMUST00000004728	ENSMUSG00000004609	Cd33	transcript	0.392599	0.254715	0.624176	0.620405	1
ENSMUST00000004729	ENSMUSG00000004610	Etfb	transcript	19.6256	20.9157	-0.091848	0.829738	1
ENSMUST00000004732	ENSMUSG00000004613	Lim2	transcript	0	0	NA	1	1
ENSMUST00000004745	ENSMUSG00000004626	Stxbp2	transcript	1.59701	1.42779	0.161588	0.833898	1
ENSMUST00000004749	ENSMUSG00000004630	Pcp2	transcript	0	0	NA	1	1
ENSMUST00000004750	ENSMUSG00000004631	Sgce	transcript	0.455023	0.330708	0.46038	0.713353	1
ENSMUST00000004756	ENSMUSG00000004637	Wwox	transcript	4.47506	4.16321	0.104212	0.863843	1
ENSMUST00000004761	ENSMUSG00000058440	Nrf1	transcript	0	0	NA	1	1
ENSMUST00000004770	ENSMUSG00000004651	Tyr	transcript	0.013897	0.01416	-0.0270478	1	1
ENSMUST00000004774	ENSMUSG00000004655	Aqp1	transcript	0.684099	1.16811	-0.771903	0.31535	1
ENSMUST00000004780	ENSMUSG00000004661	Arid3b	transcript	1.13839	0.984916	0.208923	0.760134	1
ENSMUST00000004784	ENSMUSG00000004665	Cnn2	transcript	1.82011	1.75006	0.0566245	0.943147	1
ENSMUST00000004786	ENSMUSG00000004667	Polr2e	transcript	23.3545	23.1091	0.0152393	0.987598	1
ENSMUST00000004827	ENSMUSG00000004707	Ly9	transcript	0	0	NA	1	1
ENSMUST00000004829	ENSMUSG00000004709	Cd244	transcript	0.0275897	0.0370503	-0.425358	0.825607	1
ENSMUST00000004850	ENSMUSG00000004730	Emr1	transcript	0	0	NA	1	1
ENSMUST00000004868	ENSMUSG00000004748	Mtfp1	transcript	25.6335	26.9654	-0.0730752	0.848841	1
ENSMUST00000004892	ENSMUSG00000004771	Rab11a	transcript	0	0	NA	1	1
ENSMUST00000004910	ENSMUSG00000004788	Eif2b2	transcript	11.3456	11.0249	0.0413631	0.944468	1
ENSMUST00000004913	ENSMUSG00000004791	Pgf	transcript	0.937408	1.0857	-0.211873	0.773391	1
ENSMUST00000004920	ENSMUSG00000004798	Ulk2	transcript	24.4304	24.7558	-0.0190885	0.93897	1
ENSMUST00000004936	ENSMUSG00000004814	Ccl24	transcript	0.0857823	0.0619753	0.468986	0.743663	1
ENSMUST00000004943	ENSMUSG00000004821	Tmed11	transcript	0	0	NA	1	1
ENSMUST00000004949	ENSMUSG00000027164	Traf6	transcript	4.35713	4.34733	0.00324987	0.989977	1
ENSMUST00000004955	ENSMUSG00000020528	Prpsap2	transcript	15.0261	13.6409	0.139529	0.764226	1
ENSMUST00000004959	ENSMUSG00000004837	Grap	transcript	1.7594	1.24497	0.498977	0.493399	1
ENSMUST00000004964	ENSMUSG00000004842	Pou1f1	transcript	0	0.0155593	#NAME?	0.298719	1
ENSMUST00000004965	ENSMUSG00000004843	Chmp2b	transcript	22.8414	23.579	-0.0458526	0.897694	1
ENSMUST00000004968	ENSMUSG00000004846	Plod3	transcript	6.83054	6.51818	0.0675308	0.895602	1
ENSMUST00000004985	ENSMUSG00000063952	Brpf3	transcript	7.2589	7.06164	0.0397481	0.939247	1
ENSMUST00000004986	ENSMUSG00000004864	Mapk13	transcript	0.235473	0.257476	-0.128874	0.936464	1
ENSMUST00000004990	ENSMUSG00000053436	Mapk14	transcript	12.4882	11.6169	0.104336	0.81763	1
ENSMUST00000004994	ENSMUSG00000004872	Pax3	transcript	0.013215	0	Inf	0.196793	1
ENSMUST00000005003	ENSMUSG00000004880	Lbr	transcript	4.94279	4.74197	0.05984	0.911267	1
ENSMUST00000005014	ENSMUSG00000004894	Hapln2	transcript	12.5537	11.094	0.178327	0.71613	1
ENSMUST00000005015	ENSMUSG00000004895	Prcc	transcript	21.63	22.8695	-0.0803929	0.829414	1
ENSMUST00000005016	ENSMUSG00000004896	Rrnad1	transcript	3.21245	3.70693	-0.206549	0.695332	1
ENSMUST00000005017	ENSMUSG00000004897	Hdgf	transcript	40.6234	41.6197	-0.034953	0.909413	1
ENSMUST00000005019	ENSMUSG00000004885	Crabp2	transcript	1.5248	1.34609	0.179838	0.8271	1
ENSMUST00000005041	ENSMUSG00000030435	U2af2	transcript	31.2498	31.5141	-0.0121495	0.960883	1
ENSMUST00000005051	ENSMUSG00000063229	Ldha	transcript	9.5155	3.28412	1.53477	0.0894073	1
ENSMUST00000005053	ENSMUSG00000004945	Tmem242	transcript	27.2352	27.0879	0.00782851	0.998782	1
ENSMUST00000005057	ENSMUSG00000004929	Thop1	transcript	11.9425	12.3698	-0.0507271	0.890276	1
ENSMUST00000005064	ENSMUSG00000004934	Pias4	transcript	7.27121	7.24056	0.00609398	0.997788	1
ENSMUST00000005066	ENSMUSG00000004936	Map2k1	transcript	95.0922	91.4006	0.0571235	0.888732	1
ENSMUST00000005067	ENSMUSG00000004937	Sgta	transcript	40.2335	39.416	0.0296144	0.955434	1
ENSMUST00000005069	ENSMUSG00000004939	Nmrk2	transcript	0.0257907	0.0233267	0.144869	1	1
ENSMUST00000005072	ENSMUSG00000004947	Dtx2	transcript	0	0	NA	1	1
ENSMUST00000005073	ENSMUSG00000004948	Zp3	transcript	0	0.0100363	#NAME?	0.632007	1
ENSMUST00000005077	ENSMUSG00000004951	Hspb1	transcript	6.37219	10.8954	-0.773855	0.169993	1
ENSMUST00000005103	ENSMUSG00000029832	Nfe2l3	transcript	1.7716	1.54601	0.196509	0.770499	1
ENSMUST00000005108	ENSMUSG00000030180	Kdm5a	transcript	0.180927	0.213441	-0.238425	0.830069	1
ENSMUST00000005114	ENSMUSG00000004988	Fxyd4	transcript	0	0.010598	#NAME?	0.461456	1
ENSMUST00000005120	ENSMUSG00000004994	Ccdc130	transcript	0.659143	0.750992	-0.188207	0.808821	1
ENSMUST00000005164	ENSMUSG00000005034	Prkacb	transcript	7.21744	3.40426	1.08415	0.295824	1
ENSMUST00000005173	ENSMUSG00000005043	Sgsh	transcript	2.15466	1.74767	0.302024	0.601085	1
ENSMUST00000005175	ENSMUSG00000005045	Chd5	transcript	32.879	32.8182	0.00267212	0.987626	1
ENSMUST00000005185	ENSMUSG00000005054	Cstb	transcript	15.3229	14.792	0.0508712	0.938876	1
ENSMUST00000005188	ENSMUSG00000005057	Sh2b2	transcript	1.71329	1.81934	-0.0866414	0.878306	1
ENSMUST00000005218	ENSMUSG00000005087	Cd44	transcript	0.20706	0.215452	-0.0573222	0.973933	1
ENSMUST00000005220	ENSMUSG00000005089	Slc1a2	transcript	1.29666	1.7432	-0.426941	0.554478	1
ENSMUST00000005233	ENSMUSG00000005102	Eif2ak4	transcript	4.8963	4.94355	-0.0138537	0.965446	1
ENSMUST00000005234	ENSMUSG00000005103	Wdr1	transcript	48.4471	45.6429	0.0860215	0.831774	1
ENSMUST00000005238	ENSMUSG00000005107	Slc2a9	transcript	0	0	NA	1	1
ENSMUST00000005255	ENSMUSG00000005124	Wisp1	transcript	0.919314	0.694324	0.404949	0.55114	1
ENSMUST00000005256	ENSMUSG00000005125	Ndrg1	transcript	34.1801	33.2438	0.0400713	0.937461	1
ENSMUST00000005262	ENSMUSG00000005131	4930550C14Rik	transcript	0.0820277	0.09211	-0.167247	0.943251	1
ENSMUST00000005279	ENSMUSG00000005148	Klf5	transcript	5.90441	6.23981	-0.0797092	0.86981	1
ENSMUST00000005292	ENSMUSG00000005161	Prdx2	transcript	56.4901	72.1449	-0.3529	0.355452	1
ENSMUST00000005334	ENSMUSG00000005202	Shbg	transcript	0.0306377	0.0113537	1.43215	0.557442	1
ENSMUST00000005336	ENSMUSG00000005204	Senp3	transcript	20.8475	22.7603	-0.126645	0.74141	1
ENSMUST00000005352	ENSMUSG00000005220	Corin	transcript	0.0867307	0.075279	0.204295	0.833044	1
ENSMUST00000005364	ENSMUSG00000005232	G6pc2	transcript	0	0	NA	1	1
ENSMUST00000005365	ENSMUSG00000005233	Spc25	transcript	0.0209183	0.061294	-1.55098	0.40524	1
ENSMUST00000005371	ENSMUSG00000059552	Trp53	transcript	1.90115	1.77054	0.102677	0.897966	1
ENSMUST00000005394	ENSMUSG00000005262	Ufd1l	transcript	22.4978	21.0477	0.0961203	0.832583	1
ENSMUST00000005399	ENSMUSG00000005267	Zfp287	transcript	2.33504	1.24394	0.908523	0.179238	1
ENSMUST00000005406	ENSMUSG00000022892	App	transcript	1002.2	448.166	1.16107	0.000694982	0.100311
ENSMUST00000005413	ENSMUSG00000052675	Zfp112	transcript	2.77958	2.46717	0.172009	0.771934	1
ENSMUST00000005431	ENSMUSG00000005299	Letm1	transcript	16.291	16.1292	0.0143936	0.986795	1
ENSMUST00000005452	ENSMUSG00000005320	Fgfr4	transcript	0.0566787	0.014855	1.93186	0.179175	1
ENSMUST00000005470	ENSMUSG00000005338	Cadm3	transcript	59.1755	62.6293	-0.0818376	0.803061	1
ENSMUST00000005477	ENSMUSG00000030483	Cyp2b10	transcript	0	0	NA	1	1
ENSMUST00000005487	ENSMUSG00000005354	Txn2	transcript	10.8894	8.41418	0.372025	0.493401	1
ENSMUST00000005488	ENSMUSG00000005355	Casp14	transcript	0.00582167	0	Inf	0.466005	1
ENSMUST00000005490	ENSMUSG00000005357	Slc1a6	transcript	3.72778	4.00872	-0.104824	0.84064	1
ENSMUST00000005493	ENSMUSG00000005360	Slc1a3	transcript	102.93	102.534	0.0055612	0.993431	1
ENSMUST00000005503	ENSMUSG00000005370	Msh6	transcript	6.02884	6.14143	-0.026692	0.936793	1
ENSMUST00000005504	ENSMUSG00000005371	Fbxo11	transcript	35.5781	36.3085	-0.0293163	0.916404	1
ENSMUST00000005507	ENSMUSG00000005373	Mlxipl	transcript	0.394704	0.33511	0.236135	0.788216	1
ENSMUST00000005509	ENSMUSG00000007207	Stx1a	transcript	53.1666	54.7052	-0.0411584	0.895318	1
ENSMUST00000005518	ENSMUSG00000045098	Suv420h1	transcript	0.308847	0.326679	-0.080983	0.940103	1
ENSMUST00000005532	ENSMUSG00000005397	Nid1	transcript	1.85611	1.80581	0.0396362	0.955758	1
ENSMUST00000005548	ENSMUSG00000005413	Hmox1	transcript	2.95911	2.46113	0.265842	0.680064	1
ENSMUST00000005578	ENSMUSG00000005442	Cic	transcript	6.31993	0.727432	3.11903	1.4699e-09	2.72687e-06
ENSMUST00000005583	ENSMUSG00000005447	Pafah1b3	transcript	6.0455	4.51506	0.421117	0.514755	1
ENSMUST00000005592	ENSMUSG00000030468	Siglecg	transcript	0.0150587	0.0103373	0.54273	1	1
ENSMUST00000005597	ENSMUSG00000056592	Zfp658	transcript	0.194202	0.35935	-0.887833	0.293247	1
ENSMUST00000005600	ENSMUSG00000031706	Rfx1	transcript	4.27959	4.55491	-0.089951	0.83214	1
ENSMUST00000005601	ENSMUSG00000005465	Il27ra	transcript	0.0668157	0.0574337	0.21829	0.870944	1
ENSMUST00000005606	ENSMUSG00000005469	Prkaca	transcript	84.2967	85.1636	-0.0147622	0.948733	1
ENSMUST00000005607	ENSMUSG00000005470	Asf1b	transcript	0.229371	0.138186	0.731066	0.47665	1
ENSMUST00000005611	ENSMUSG00000005474	Myl10	transcript	0	0	NA	1	1
ENSMUST00000005616	ENSMUSG00000057672	Pkn1	transcript	8.01469	9.37657	-0.226414	0.611136	1
ENSMUST00000005620	ENSMUSG00000005483	Dnajb1	transcript	20.5527	24.4257	-0.249073	0.528336	1
ENSMUST00000005630	ENSMUSG00000005493	Msh4	transcript	0.0604157	0.027099	1.15668	0.348966	1
ENSMUST00000005643	ENSMUSG00000005506	Celf1	transcript	2.36991	2.10923	0.168116	0.76401	1
ENSMUST00000005647	ENSMUSG00000005510	Ndufs3	transcript	48.6277	48.0943	0.015911	0.984415	1
ENSMUST00000005651	ENSMUSG00000005514	Por	transcript	23.3766	20.002	0.224919	0.590106	1
ENSMUST00000005669	ENSMUSG00000040583	Cyp2b13	transcript	0	0	NA	1	1
ENSMUST00000005671	ENSMUSG00000005533	Igf1r	transcript	21.1297	21.7476	-0.0415835	0.89425	1
ENSMUST00000005678	ENSMUSG00000005540	Fcer2a	transcript	0.043789	0.00493167	3.15042	0.068072	1
ENSMUST00000005685	ENSMUSG00000005547	Cyp2a5	transcript	0.110197	0.0173907	2.6637	0.0446528	1
ENSMUST00000005692	ENSMUSG00000005553	Atp4a	transcript	0.078159	0.105414	-0.431578	0.699622	1
ENSMUST00000005705	ENSMUSG00000005566	Trim28	transcript	31.237	31.857	-0.0283523	0.922091	1
ENSMUST00000005711	ENSMUSG00000033916	Chmp2a	transcript	40.3572	39.1827	0.0426068	0.935018	1
ENSMUST00000005714	ENSMUSG00000005575	Ube2m	transcript	23.9607	34.3855	-0.52113	0.217992	1
ENSMUST00000005719	ENSMUSG00000005580	Adcy9	transcript	26.3351	25.5883	0.0415024	0.929344	1
ENSMUST00000005722	ENSMUSG00000005583	Mef2c	transcript	7.54595	7.09884	0.088119	0.847754	1
ENSMUST00000005749	ENSMUSG00000005609	Ctr9	transcript	13.5718	13.9922	-0.0440059	0.895798	1
ENSMUST00000005751	ENSMUSG00000005611	Mrvi1	transcript	0.0764653	0.229537	-1.58585	0.167027	1
ENSMUST00000005768	ENSMUSG00000028126	Pip5k1a	transcript	0	0	NA	1	1
ENSMUST00000005769	ENSMUSG00000005628	Tmod4	transcript	0	0	NA	1	1
ENSMUST00000005791	ENSMUSG00000005649	Cabp5	transcript	0.0777997	0.0366927	1.08427	0.427052	1
ENSMUST00000005798	ENSMUSG00000005656	Snx6	transcript	14.8125	14.8348	-0.00217474	0.979588	1
ENSMUST00000005810	ENSMUSG00000005667	Mthfd2	transcript	2.38581	2.76011	-0.210247	0.728373	1
ENSMUST00000005815	ENSMUSG00000005672	Kit	transcript	8.87777	5.62293	0.658876	0.168016	1
ENSMUST00000005817	ENSMUSG00000005674	Tomm40l	transcript	0.596265	0.801284	-0.426359	0.52484	1
ENSMUST00000005820	ENSMUSG00000005677	Nr1i3	transcript	0	0	NA	1	1
ENSMUST00000005824	ENSMUSG00000005681	Apoa2	transcript	0.0751463	0.120187	-0.677506	0.821617	1
ENSMUST00000005825	ENSMUSG00000005682	Pan2	transcript	2.54301	2.58952	-0.0261463	0.945996	1
ENSMUST00000005826	ENSMUSG00000005683	Cs	transcript	77.0929	76.0115	0.0203818	0.971831	1
ENSMUST00000005829	ENSMUSG00000005686	Ampd3	transcript	0.749899	0.761658	-0.0224464	0.969083	1
ENSMUST00000005830	ENSMUSG00000005687	Bcas2	transcript	19.6304	20.0553	-0.0308984	0.929205	1
ENSMUST00000005839	ENSMUSG00000005696	Sh2d1a	transcript	0.0556597	0	Inf	0.0763408	1
ENSMUST00000005841	ENSMUSG00000005698	Ctcf	transcript	16.6615	17.3951	-0.0621599	0.858633	1
ENSMUST00000005849	ENSMUSG00000005705	Agrp	transcript	0	0	NA	1	1
ENSMUST00000005860	ENSMUSG00000005716	Pvalb	transcript	43.4607	44.1348	-0.0222047	0.941823	1
ENSMUST00000005862	ENSMUSG00000005718	Tfap4	transcript	1.84271	1.36295	0.435096	0.526737	1
ENSMUST00000005889	ENSMUSG00000034116	Vav1	transcript	1.29665	0.833673	0.637236	0.350943	1
ENSMUST00000005891	ENSMUSG00000047884	Klk9	transcript	0	0.022319	#NAME?	0.0657034	1
ENSMUST00000005907	ENSMUSG00000005763	Cd247	transcript	0.0376717	0.0171553	1.13482	0.618056	1
ENSMUST00000005923	ENSMUSG00000005779	Psmb4	transcript	68.3845	67.4438	0.0199842	0.975559	1
ENSMUST00000005933	ENSMUSG00000038968	Klk1b16	transcript	0	0	NA	1	1
ENSMUST00000005950	ENSMUSG00000049723	Mmp12	transcript	0.0106153	0	Inf	0.112134	1
ENSMUST00000005952	ENSMUSG00000005802	Slc30a4	transcript	17.4581	18.1624	-0.0570593	0.861188	1
ENSMUST00000005953	ENSMUSG00000005803	Sqrdl	transcript	2.09157	2.52953	-0.274281	0.66486	1
ENSMUST00000005954	ENSMUSG00000005804	Bloc1s6	transcript	7.27806	7.3268	-0.00962936	0.967532	1
ENSMUST00000005964	ENSMUSG00000028138	Adh5	transcript	20.4993	18.9408	0.114077	0.805026	1
ENSMUST00000005975	ENSMUSG00000005823	Gpr108	transcript	7.63911	7.63477	0.000820184	0.986405	1
ENSMUST00000005976	ENSMUSG00000005824	Tnfsf14	transcript	0	0.0132677	#NAME?	0.188892	1
ENSMUST00000006005	ENSMUSG00000032492	Pth1r	transcript	0.912423	0.758228	0.267072	0.778567	1
ENSMUST00000006020	ENSMUSG00000005864	Cnga2	transcript	0.0237167	0.016512	0.522386	0.792679	1
ENSMUST00000006027	ENSMUSG00000005873	Reep5	transcript	120.238	112.325	0.0982099	0.790656	1
ENSMUST00000006029	ENSMUSG00000078954	Arhgap8	transcript	0	0	NA	1	1
ENSMUST00000006035	ENSMUSG00000005881	Ergic3	transcript	38.8728	39.5374	-0.0244574	0.934482	1
ENSMUST00000006036	ENSMUSG00000005882	Uqcc1	transcript	0	0	NA	1	1
ENSMUST00000006037	ENSMUSG00000005886	Ncoa2	transcript	4.50768	4.69189	-0.0577846	0.88427	1
ENSMUST00000006046	ENSMUSG00000005892	Trh	transcript	4.03025	3.62313	0.153634	0.839522	1
ENSMUST00000006053	ENSMUSG00000005899	Smpd4	transcript	1.72509	2.45302	-0.507891	0.454152	1
ENSMUST00000006061	ENSMUSG00000005907	Pex1	transcript	0.588471	0	Inf	1.6571e-05	0.00720837
ENSMUST00000006071	ENSMUSG00000005917	Otx1	transcript	1.39389	1.42067	-0.0274606	0.96038	1
ENSMUST00000006094	ENSMUSG00000022445	Cyp2d26	transcript	0.0115417	0.0265563	-1.2022	0.73324	1
ENSMUST00000006101	ENSMUSG00000005947	Itgae	transcript	0.0614207	0.047066	0.384039	0.747112	1
ENSMUST00000006103	ENSMUSG00000005949	Ctns	transcript	1.86404	2.48473	-0.414656	0.535836	1
ENSMUST00000006104	ENSMUSG00000005950	P2rx5	transcript	0.485328	0.43635	0.153472	0.862037	1
ENSMUST00000006105	ENSMUSG00000005951	Shpk	transcript	1.28551	1.04072	0.30476	0.657881	1
ENSMUST00000006106	ENSMUSG00000005952	Trpv1	transcript	0	0	NA	1	1
ENSMUST00000006112	ENSMUSG00000005958	Ephb3	transcript	5.25152	5.67582	-0.112094	0.791093	1
ENSMUST00000006123	ENSMUSG00000005968	Tuft1	transcript	0.653059	0.816637	-0.322482	0.654921	1
ENSMUST00000006128	ENSMUSG00000005973	Rcn1	transcript	9.6507	8.83329	0.127684	0.803214	1
ENSMUST00000006136	ENSMUSG00000005980	Dnase1	transcript	0.041166	0.0399543	0.0431013	1	1
ENSMUST00000006137	ENSMUSG00000005981	Trap1	transcript	22.2066	21.496	0.0469228	0.924363	1
ENSMUST00000006151	ENSMUSG00000005994	Tyrp1	transcript	0.0473933	0.0719627	-0.602565	0.682237	1
ENSMUST00000006167	ENSMUSG00000006010	BC003331	transcript	0.0161103	0.0181407	-0.171241	1	1
ENSMUST00000006171	ENSMUSG00000006014	Prg4	transcript	0	0.0466973	#NAME?	0.0913481	1
ENSMUST00000006178	ENSMUSG00000006021	Kptn	transcript	7.15523	6.66908	0.101509	0.860702	1
ENSMUST00000006181	ENSMUSG00000006024	Napa	transcript	64.4825	61.4237	0.0701115	0.862691	1
ENSMUST00000006209	ENSMUSG00000006050	Sra1	transcript	0.174739	0.122432	0.513222	0.855825	1
ENSMUST00000006217	ENSMUSG00000006058	Snf8	transcript	22.4526	23.4934	-0.0653726	0.873317	1
ENSMUST00000006221	ENSMUSG00000020128	Vps54	transcript	1.43405	1.8233	-0.346456	0.563741	1
ENSMUST00000006235	ENSMUSG00000021939	Ctsb	transcript	100	92.3315	0.11511	0.75168	1
ENSMUST00000006254	ENSMUSG00000006095	Tbcb	transcript	26.4133	28.9592	-0.132759	0.739329	1
ENSMUST00000006286	ENSMUSG00000006127	Inpp5k	transcript	9.7361	9.2425	0.0750596	0.880074	1
ENSMUST00000006293	ENSMUSG00000006134	Crkl	transcript	15.6019	16.2548	-0.0591417	0.864729	1
ENSMUST00000006301	ENSMUSG00000029703	Lrwd1	transcript	3.33365	3.22242	0.0489596	0.945393	1
ENSMUST00000006303	ENSMUSG00000006143	Upk3bl	transcript	0	0	NA	1	1
ENSMUST00000006311	ENSMUSG00000030353	Tead4	transcript	0.140935	0.116494	0.274774	0.780283	1
ENSMUST00000006341	ENSMUSG00000006179	Prss16	transcript	0.190591	0.290074	-0.605941	0.475455	1
ENSMUST00000006353	ENSMUSG00000006191	Cdkal1	transcript	5.90692	5.75112	0.0385636	0.950811	1
ENSMUST00000006362	ENSMUSG00000006200	Rhox6	transcript	0	0	NA	1	1
ENSMUST00000006367	ENSMUSG00000006205	Htra1	transcript	66.7089	68.142	-0.030664	0.913624	1
ENSMUST00000006377	ENSMUSG00000006215	Zbtb17	transcript	8.76269	10.4126	-0.248884	0.558152	1
ENSMUST00000006378	ENSMUSG00000006216	Clcnkb	transcript	0	0	NA	1	1
ENSMUST00000006380	ENSMUSG00000006218	Fam131c	transcript	1.68816	1.70627	-0.015398	0.978859	1
ENSMUST00000006381	ENSMUSG00000006219	Fblim1	transcript	0.315581	0.259165	0.284143	0.741185	1
ENSMUST00000006391	ENSMUSG00000045827	Serpinb9	transcript	2.6264	2.60239	0.0132484	0.992352	1
ENSMUST00000006392	ENSMUSG00000021403	Serpinb9b	transcript	0	0.007057	#NAME?	0.183447	1
ENSMUST00000006397	ENSMUSG00000006235	Epor	transcript	2.69694	2.03518	0.406164	0.530188	1
ENSMUST00000006403	ENSMUSG00000006241	Ccdc159	transcript	1.92694	1.78745	0.108416	0.886055	1
ENSMUST00000006424	ENSMUSG00000006262	Mob1b	transcript	1.47137	1.79062	-0.283298	0.639844	1
ENSMUST00000006431	ENSMUSG00000006269	Atp6v1b1	transcript	0.007529	0.0237193	-1.65553	0.48307	1
ENSMUST00000006435	ENSMUSG00000006273	Atp6v1b2	transcript	210.344	202.787	0.0527884	0.894398	1
ENSMUST00000006444	ENSMUSG00000006281	Tep1	transcript	1.04217	0.95582	0.124776	0.837934	1
ENSMUST00000006451	ENSMUSG00000006288	Ttc5	transcript	12.0223	11.6784	0.0418722	0.94144	1
ENSMUST00000006462	ENSMUSG00000006299	Aamp	transcript	20.4808	16.7124	0.293352	0.520554	1
ENSMUST00000006467	ENSMUSG00000006304	Arpc2	transcript	40.2926	39.1163	0.0427429	0.931551	1
ENSMUST00000006470	ENSMUSG00000006307	Kmt2b	transcript	4.76919	5.49956	-0.20557	0.612521	1
ENSMUST00000006476	ENSMUSG00000006313	Upk1a	transcript	0.0949413	0.121626	-0.357339	0.831693	1
ENSMUST00000006478	ENSMUSG00000006315	Tmem147	transcript	36.696	36.3379	0.0141485	0.989492	1
ENSMUST00000006496	ENSMUSG00000006333	Rps9	transcript	29.6386	33.6697	-0.183974	0.681696	1
ENSMUST00000006508	ENSMUSG00000006345	Ggt1	transcript	0	0.07755	#NAME?	0.041605	1
ENSMUST00000006523	ENSMUSG00000006360	Crip1	transcript	6.75035	6.61797	0.0285725	0.982151	1
ENSMUST00000006525	ENSMUSG00000006362	Cbfa2t3	transcript	0.544415	0.896231	-0.719164	0.31243	1
ENSMUST00000006544	ENSMUSG00000006378	Gcat	transcript	3.64928	3.1284	0.222187	0.703556	1
ENSMUST00000006556	ENSMUSG00000006389	Mpl	transcript	0	0	NA	1	1
ENSMUST00000006557	ENSMUSG00000006390	Elovl1	transcript	4.43605	3.46603	0.355993	0.552887	1
ENSMUST00000006559	ENSMUSG00000035274	Tpbg	transcript	3.64675	2.79358	0.384497	0.467536	1
ENSMUST00000006565	ENSMUSG00000006398	Cdc20	transcript	0.584689	0.404216	0.532542	0.515213	1
ENSMUST00000006578	ENSMUSG00000006411	Pvrl4	transcript	0.42708	0.682227	-0.675744	0.36776	1
ENSMUST00000006579	ENSMUSG00000006412	Pfdn2	transcript	0.450551	0.581404	-0.367851	0.708366	1
ENSMUST00000006587	ENSMUSG00000090213	Tmem189	transcript	13.4156	13.3396	0.00818733	1	1
ENSMUST00000006611	ENSMUSG00000006442	Srm	transcript	22.4647	22.8466	-0.0243235	0.941291	1
ENSMUST00000006614	ENSMUSG00000006445	Epha2	transcript	0.411548	0.483729	-0.233139	0.743025	1
ENSMUST00000006618	ENSMUSG00000028919	Arhgef19	transcript	2.72965	2.96907	-0.121296	0.80825	1
ENSMUST00000006625	ENSMUSG00000006456	Rbm14	transcript	7.63328	8.23275	-0.109071	0.791271	1
ENSMUST00000006626	ENSMUSG00000006457	Actn3	transcript	0.259688	0.204435	0.345137	0.704362	1
ENSMUST00000006629	ENSMUSG00000020315	Sptbn1	transcript	4.16861	4.2239	-0.0190079	0.950368	1
ENSMUST00000006632	ENSMUSG00000006463	Zdhhc24	transcript	5.6498	5.83457	-0.0464265	0.908333	1
ENSMUST00000006638	ENSMUSG00000006469	Slc34a3	transcript	0.0342343	0	Inf	0.0116548	0.584363
ENSMUST00000006646	ENSMUSG00000006476	Nsmf	transcript	25.827	31.3267	-0.278514	0.557275	1
ENSMUST00000006659	ENSMUSG00000006488	Prl7a1	transcript	0	0	NA	1	1
ENSMUST00000006660	ENSMUSG00000046899	Prl7a2	transcript	0	0	NA	1	1
ENSMUST00000006662	ENSMUSG00000006490	Prl8a9	transcript	0	0	NA	1	1
ENSMUST00000006664	ENSMUSG00000019756	Prl8a1	transcript	0	0	NA	1	1
ENSMUST00000006667	ENSMUSG00000045868	Gvin1	transcript	1.20027	0.777636	0.626191	0.299604	1
ENSMUST00000006669	ENSMUSG00000006494	Pdk1	transcript	11.7947	10.6832	0.142796	0.737981	1
ENSMUST00000006679	ENSMUSG00000057729	Prtn3	transcript	0.792872	0.693793	0.192583	0.819222	1
ENSMUST00000006687	ENSMUSG00000028359	Orm3	transcript	0	0	NA	1	1
ENSMUST00000006692	ENSMUSG00000006517	Mvd	transcript	6.89434	5.93684	0.215717	0.686988	1
ENSMUST00000006697	ENSMUSG00000006522	Itih3	transcript	11.4201	10.7368	0.0890146	0.854423	1
ENSMUST00000006701	ENSMUSG00000006526	Tmem110	transcript	5.72084	5.50276	0.0560723	0.916586	1
ENSMUST00000006703	ENSMUSG00000021922	Itih4	transcript	0.0183567	0.013191	0.47675	1	1
ENSMUST00000006704	ENSMUSG00000006529	Itih1	transcript	0	0	NA	1	1
ENSMUST00000006716	ENSMUSG00000033227	Wnt6	transcript	0.870932	0.793765	0.133847	0.868842	1
ENSMUST00000006718	ENSMUSG00000026167	Wnt10a	transcript	2.96075	2.7478	0.107687	0.871776	1
ENSMUST00000006721	ENSMUSG00000006546	Cryba2	transcript	0.186138	0.0737023	1.33659	0.294685	1
ENSMUST00000006742	ENSMUSG00000006567	Atp7b	transcript	0.580686	0.519898	0.15953	0.820176	1
ENSMUST00000006745	ENSMUSG00000006570	Defb2	transcript	0	0	NA	1	1
ENSMUST00000006749	ENSMUSG00000006574	Slc4a1	transcript	0.0393433	0.05677	-0.52901	0.656949	1
ENSMUST00000006750	ENSMUSG00000006575	Rundc3a	transcript	67.6125	67.6302	-0.00037585	0.981998	1
ENSMUST00000006754	ENSMUSG00000020923	Ubtf	transcript	0.560059	0.16418	1.7703	0.25139	1
ENSMUST00000006760	ENSMUSG00000006585	Cdt1	transcript	0.541992	0.429603	0.335268	0.685748	1
ENSMUST00000006761	ENSMUSG00000006586	Runx1t1	transcript	1.439	1.5686	-0.124417	0.847105	1
ENSMUST00000006762	ENSMUSG00000006587	Snai3	transcript	0.343782	0.278822	0.302148	0.737601	1
ENSMUST00000006764	ENSMUSG00000006589	Aprt	transcript	11.8645	12.7749	-0.106658	0.828417	1
ENSMUST00000006774	ENSMUSG00000006599	Gtf2h1	transcript	12.4937	12.6521	-0.0181771	0.950709	1
ENSMUST00000006785	ENSMUSG00000021335	Slc17a1	transcript	0.00635767	0	Inf	0.631748	1
ENSMUST00000006786	ENSMUSG00000036110	Slc17a2	transcript	0.00128633	0.002624	-1.0285	0.771901	1
ENSMUST00000006787	ENSMUSG00000006611	Hfe	transcript	0	0	NA	1	1
ENSMUST00000006792	ENSMUSG00000062524	Ncr1	transcript	0	0	NA	1	1
ENSMUST00000006817	ENSMUSG00000006641	Slc5a6	transcript	0	0	NA	1	1
ENSMUST00000006818	ENSMUSG00000006642	Tcf23	transcript	0.228621	0.117284	0.962952	0.269271	1
ENSMUST00000006825	ENSMUSG00000006649	Nphs1	transcript	0.220453	0.219006	0.00950291	1	1
ENSMUST00000006828	ENSMUSG00000006651	Aplp1	transcript	432.137	416.582	0.0528869	0.894155	1
ENSMUST00000006838	ENSMUSG00000032604	Qars	transcript	4.01017	3.03907	0.400032	0.51747	1
ENSMUST00000006851	ENSMUSG00000006673	Qrich1	transcript	5.19693	6.87134	-0.402932	0.526374	1
ENSMUST00000006853	ENSMUSG00000006675	P4htm	transcript	25.222	23.97	0.0734525	0.874544	1
ENSMUST00000006854	ENSMUSG00000006676	Usp19	transcript	1.02767	1.24965	-0.28215	0.665734	1
ENSMUST00000006856	ENSMUSG00000006678	Pola1	transcript	1.86734	1.88468	-0.0133373	0.966867	1
ENSMUST00000006893	ENSMUSG00000006711	D130043K22Rik	transcript	10.3936	10.7504	-0.0486906	0.888068	1
ENSMUST00000006898	ENSMUSG00000006715	Gmnn	transcript	0.0247143	0.047765	-0.950606	0.604033	1
ENSMUST00000006900	ENSMUSG00000006717	Acot13	transcript	38.4834	38.0846	0.0150266	0.986666	1
ENSMUST00000006903	ENSMUSG00000006720	Zfp184	transcript	0.0397983	0.208466	-2.38903	0.0551288	1
ENSMUST00000006911	ENSMUSG00000006728	Cdk4	transcript	7.55595	7.76715	-0.039772	0.918143	1
ENSMUST00000006912	ENSMUSG00000026737	Pip4k2a	transcript	25.5021	25.5756	-0.00415554	0.974001	1
ENSMUST00000006914	ENSMUSG00000006731	B4galnt1	transcript	32.8844	32.1569	0.0322763	0.950222	1
ENSMUST00000006915	ENSMUSG00000006732	Mettl1	transcript	3.32574	2.98388	0.156486	0.8078	1
ENSMUST00000006949	ENSMUSG00000006764	Tph2	transcript	0.34317	0.245613	0.482535	0.578284	1
ENSMUST00000006952	ENSMUSG00000040017	Saa4	transcript	0	0	NA	1	1
ENSMUST00000006956	ENSMUSG00000040026	Saa3	transcript	0	0	NA	1	1
ENSMUST00000006963	ENSMUSG00000055937	Krt28	transcript	0.0496803	0.0273887	0.859096	0.574691	1
ENSMUST00000006969	ENSMUSG00000006777	Krt23	transcript	0	0.012542	#NAME?	0.364751	1
ENSMUST00000006973	ENSMUSG00000020918	Kat2a	transcript	13.8943	13.7858	0.0113132	0.994901	1
ENSMUST00000006976	ENSMUSG00000006784	Ttc25	transcript	0.2313	0.187618	0.301968	0.830393	1
ENSMUST00000006991	ENSMUSG00000021730	Hcn1	transcript	24.0069	24.6323	-0.0371017	0.906318	1
ENSMUST00000007005	ENSMUSG00000023832	Acat2	transcript	10.9574	9.12384	0.264187	0.576072	1
ENSMUST00000007007	ENSMUSG00000060475	Wtap	transcript	5.90097	2.46386	1.26003	0.0570507	1
ENSMUST00000007012	ENSMUSG00000006818	Sod2	transcript	59.3028	59.1313	0.00417825	0.990677	1
ENSMUST00000007042	ENSMUSG00000024474	Ik	transcript	26.8655	28.1049	-0.0650637	0.855349	1
ENSMUST00000007046	ENSMUSG00000006850	Tmco6	transcript	2.91687	2.9241	-0.0035737	0.988944	1
ENSMUST00000007130	ENSMUSG00000006932	Ctnnb1	transcript	113.562	111.288	0.0291895	0.950313	1
ENSMUST00000007131	ENSMUSG00000020917	Acly	transcript	0.0351187	0.0241897	0.537847	0.74421	1
ENSMUST00000007139	ENSMUSG00000006941	Eif1b	transcript	54.1476	55.1068	-0.0253333	0.934209	1
ENSMUST00000007156	ENSMUSG00000044485	Klk1b11	transcript	0	0	NA	1	1
ENSMUST00000007161	ENSMUSG00000006948	Klk4	transcript	0	0	NA	1	1
ENSMUST00000007171	ENSMUSG00000006958	Chrd	transcript	4.83022	4.55331	0.0851739	0.871162	1
ENSMUST00000007207	ENSMUSG00000022843	Clcn2	transcript	10.5589	9.49654	0.152986	0.738132	1
ENSMUST00000007212	ENSMUSG00000006998	Psmd2	transcript	67.1473	66.0292	0.0242254	0.964125	1
ENSMUST00000007216	ENSMUSG00000022841	Ap2m1	transcript	41.9055	9.24791	2.17994	0.0283014	1
ENSMUST00000007236	ENSMUSG00000007021	Syngr3	transcript	61.2665	61.4501	-0.0043162	0.973089	1
ENSMUST00000007245	ENSMUSG00000007030	Vwa7	transcript	0.288986	0.219525	0.396613	0.620552	1
ENSMUST00000007248	ENSMUSG00000007033	Hspa1l	transcript	0.234505	0.279158	-0.251461	0.759176	1
ENSMUST00000007249	ENSMUSG00000007034	Slc44a4	transcript	0.129963	0.071976	0.852509	0.383803	1
ENSMUST00000007250	ENSMUSG00000007035	Msh5	transcript	0.285442	0.214067	0.415131	0.665562	1
ENSMUST00000007251	ENSMUSG00000007036	Abhd16a	transcript	28.458	25.186	0.176215	0.679452	1
ENSMUST00000007253	ENSMUSG00000007038	Neu1	transcript	14.4131	14.3362	0.00771241	0.99903	1
ENSMUST00000007255	ENSMUSG00000007039	Ddah2	transcript	3.45182	2.96469	0.219474	0.740982	1
ENSMUST00000007257	ENSMUSG00000007041	Clic1	transcript	4.0228	3.53409	0.18686	0.76852	1
ENSMUST00000007259	ENSMUSG00000073413	Ly6g6d	transcript	0.0954167	0.171892	-0.849189	0.532394	1
ENSMUST00000007266	ENSMUSG00000007050	Lsm2	transcript	0.15361	0.268987	-0.808263	0.611307	1
ENSMUST00000007272	ENSMUSG00000045545	Krt14	transcript	0	0	NA	1	1
ENSMUST00000007275	ENSMUSG00000044041	Krt13	transcript	0	0	NA	1	1
ENSMUST00000007280	ENSMUSG00000053797	Krt16	transcript	0	0.00776167	#NAME?	0.630454	1
ENSMUST00000007296	ENSMUSG00000007080	Pole	transcript	0.248221	0.16724	0.569707	0.458155	1
ENSMUST00000007301	ENSMUSG00000020908	Myh3	transcript	0	0	NA	1	1
ENSMUST00000007317	ENSMUSG00000020911	Krt19	transcript	0.0543887	0.0679563	-0.321302	0.812761	1
ENSMUST00000007318	ENSMUSG00000048981	Krt31	transcript	0.0159993	0	Inf	0.252994	1
ENSMUST00000007340	ENSMUSG00000022229	Atp12a	transcript	0.0156063	0.043702	-1.48557	0.208702	1
ENSMUST00000007423	ENSMUSG00000007279	Scube2	transcript	0.461197	0.013082	5.13973	6.8078e-05	0.0211526
ENSMUST00000007433	ENSMUSG00000098306	Gm28040	transcript	0.0457767	0.0559997	-0.290806	0.920349	1
ENSMUST00000007444	ENSMUSG00000069631	Strada	transcript	5.2661	5.36552	-0.0269825	0.946933	1
ENSMUST00000007449	ENSMUSG00000052131	Akr1b7	transcript	0	0	NA	1	1
ENSMUST00000007482	ENSMUSG00000007338	Mrpl49	transcript	11.8509	13.3207	-0.168666	0.697272	1
ENSMUST00000007533	ENSMUSG00000078656	Vps25	transcript	2.78076	3.11776	-0.165031	0.823449	1
ENSMUST00000007559	ENSMUSG00000007415	Gatad1	transcript	23.7871	25.9473	-0.125403	0.737812	1
ENSMUST00000007584	ENSMUSG00000103255	PCDHA9	transcript	1.28259	1.27731	0.00595924	0.998567	1
ENSMUST00000007601	ENSMUSG00000007457	2310003L06Rik	transcript	0.00771367	0.00828333	-0.102795	1	1
ENSMUST00000007602	ENSMUSG00000007458	M6pr	transcript	28.926	29.4684	-0.0268015	0.929247	1
ENSMUST00000007708	ENSMUSG00000007564	Ppp2r1a	transcript	173.277	170.702	0.0216015	0.968862	1
ENSMUST00000007733	ENSMUSG00000007589	Tinf2	transcript	4.08978	3.5643	0.198406	0.743965	1
ENSMUST00000007735	ENSMUSG00000007591	Tssk4	transcript	0	0	NA	1	1
ENSMUST00000007738	ENSMUSG00000007594	Hapln4	transcript	29.7221	30.9548	-0.0586247	0.861896	1
ENSMUST00000007747	ENSMUSG00000007603	Dus3l	transcript	13.1168	12.2508	0.0985451	0.835463	1
ENSMUST00000007754	ENSMUSG00000007610	Gtpbp3	transcript	6.16549	6.54916	-0.0870958	0.838183	1
ENSMUST00000007757	ENSMUSG00000007613	Tgfbr1	transcript	6.95847	5.40236	0.365181	0.400557	1
ENSMUST00000007790	ENSMUSG00000007646	Rad51c	transcript	0	0	NA	1	1
ENSMUST00000007797	ENSMUSG00000007653	Gabrb2	transcript	67.0801	65.7643	0.0285807	0.953007	1
ENSMUST00000007799	ENSMUSG00000007655	Cav1	transcript	0.773027	0.0388283	4.31534	0.00887757	0.494617
ENSMUST00000007800	ENSMUSG00000007656	Arpp19	transcript	1.55408	0.932355	0.737107	0.337949	1
ENSMUST00000007803	ENSMUSG00000007659	Bcl2l1	transcript	4.4289	3.26756	0.438733	0.430336	1
ENSMUST00000007814	ENSMUSG00000007670	Khsrp	transcript	31.5932	33.6124	-0.08938	0.790425	1
ENSMUST00000007865	ENSMUSG00000007721	Ccdc124	transcript	35.4982	35.1601	0.013807	0.991417	1
ENSMUST00000007884	ENSMUSG00000023882	Zfp54	transcript	0.249061	0.112804	1.14267	0.583555	1
ENSMUST00000007921	ENSMUSG00000007777	0610009B22Rik	transcript	11.2884	10.7647	0.0685324	0.914446	1
ENSMUST00000007949	ENSMUSG00000007805	Twist2	transcript	0.485946	0.31542	0.62352	0.508605	1
ENSMUST00000007959	ENSMUSG00000007815	Rhoa	transcript	57.0146	56.7419	0.00691698	0.997483	1
ENSMUST00000007961	ENSMUSG00000007817	Zmiz1	transcript	18.0516	18.0326	0.0015219	0.984699	1
ENSMUST00000007977	ENSMUSG00000007833	Aldh16a1	transcript	1.46107	1.31186	0.155412	0.80965	1
ENSMUST00000007980	ENSMUSG00000007836	Hnrnpa0	transcript	47.0894	48.2996	-0.0366107	0.902872	1
ENSMUST00000007981	ENSMUSG00000007837	Prrg2	transcript	0.96777	1.16922	-0.272806	0.736551	1
ENSMUST00000007993	ENSMUSG00000029701	Rbm28	transcript	6.66468	6.83533	-0.0364761	0.917299	1
ENSMUST00000008004	ENSMUSG00000057788	Ddx49	transcript	8.72935	7.76988	0.167983	0.730444	1
ENSMUST00000008016	ENSMUSG00000007872	Id3	transcript	14.2633	13.921	0.0350412	0.954289	1
ENSMUST00000008021	ENSMUSG00000007877	Tcap	transcript	1.10351	1.39065	-0.33366	0.664401	1
ENSMUST00000008024	ENSMUSG00000007880	Arid1a	transcript	0.012584	1.32481	-6.71805	0.00011012	0.0294315
ENSMUST00000008032	ENSMUSG00000007888	Crlf1	transcript	0.950661	1.21448	-0.353337	0.64924	1
ENSMUST00000008036	ENSMUSG00000007892	Rplp1	transcript	586.401	570.105	0.0406613	0.923457	1
ENSMUST00000008051	ENSMUSG00000007907	Cabs1	transcript	0	0	NA	1	1
ENSMUST00000008052	ENSMUSG00000007908	Hmgcll1	transcript	4.4066	4.48265	-0.0246885	0.944067	1
ENSMUST00000008088	ENSMUSG00000007944	Ttc9b	transcript	68.4855	67.3624	0.0238559	0.967833	1
ENSMUST00000008090	ENSMUSG00000007946	Phox2a	transcript	0	0.014178	#NAME?	0.250905	1
ENSMUST00000008094	ENSMUSG00000007950	Abhd8	transcript	95.84	98.3855	-0.0378175	0.897723	1
ENSMUST00000008131	ENSMUSG00000007987	Ift22	transcript	24.8048	24.6408	0.00956948	0.998559	1
ENSMUST00000008179	ENSMUSG00000008035	Mid1ip1	transcript	22.9224	20.3873	0.169087	0.734003	1
ENSMUST00000008273	ENSMUSG00000030069	Prok2	transcript	0.00550533	0	Inf	0.631714	1
ENSMUST00000008280	ENSMUSG00000008136	Fhl2	transcript	15.6226	14.2721	0.130436	0.786746	1
ENSMUST00000008284	ENSMUSG00000008140	Emc10	transcript	34.3894	24.5857	0.484144	0.341639	1
ENSMUST00000008297	ENSMUSG00000008153	Clstn3	transcript	119.847	120.751	-0.0108455	0.954986	1
ENSMUST00000008350	ENSMUSG00000008206	Cers4	transcript	4.5804	4.01035	0.191746	0.661846	1
ENSMUST00000008445	ENSMUSG00000008301	Phax	transcript	13.0507	12.9602	0.010035	0.997608	1
ENSMUST00000008451	ENSMUSG00000008307	1700109H08Rik	transcript	0.899518	0.99709	-0.148573	0.86763	1
ENSMUST00000008462	ENSMUSG00000008318	Relt	transcript	4.87733	4.98046	-0.030187	0.936349	1
ENSMUST00000008477	ENSMUSG00000008333	Snrpb2	transcript	7.93138	8.3703	-0.0777072	0.854596	1
ENSMUST00000008517	ENSMUSG00000008373	Prpf31	transcript	5.68715	5.63951	0.012134	0.993295	1
ENSMUST00000008528	ENSMUSG00000008384	Sertad1	transcript	4.63321	5.36299	-0.211026	0.714806	1
ENSMUST00000008537	ENSMUSG00000008393	Carhsp1	transcript	17.1631	15.5562	0.141823	0.748847	1
ENSMUST00000008542	ENSMUSG00000008398	Elk3	transcript	1.50637	1.49101	0.0147801	0.990446	1
ENSMUST00000008573	ENSMUSG00000008429	Herpud2	transcript	18.0936	18.346	-0.0199855	0.94483	1
ENSMUST00000008579	ENSMUSG00000008435	Rdh13	transcript	5.18486	6.14812	-0.245842	0.586715	1
ENSMUST00000008582	ENSMUSG00000008438	Adam21	transcript	0.294797	0.163411	0.851212	0.302527	1
ENSMUST00000008594	ENSMUSG00000008450	Nutf2	transcript	11.4875	12.3103	-0.0998006	0.810003	1
ENSMUST00000008605	ENSMUSG00000008461	Fut1	transcript	0.0201277	0.0235253	-0.225035	1	1
ENSMUST00000008626	ENSMUSG00000008482	Rnf151	transcript	0.183594	0.0366007	2.32658	0.162054	1
ENSMUST00000008633	ENSMUSG00000008489	Elavl2	transcript	2.06447	1.09787	0.911068	0.138742	1
ENSMUST00000008684	ENSMUSG00000008540	Mgst1	transcript	3.36375	3.6164	-0.104485	0.867189	1
ENSMUST00000008733	ENSMUSG00000029131	Dnajb6	transcript	4.82052	7.42132	-0.622488	0.172528	1
ENSMUST00000008734	ENSMUSG00000008590	Htr3b	transcript	0.00512867	0.00503833	0.0256372	1	1
ENSMUST00000008745	ENSMUSG00000008601	Rab25	transcript	0.111141	0.026216	2.08387	0.132937	1
ENSMUST00000008748	ENSMUSG00000008604	Ubqln4	transcript	34.2739	34.9818	-0.0294957	0.920313	1
ENSMUST00000008801	ENSMUSG00000073424	Cyp4f15	transcript	3.27328	2.91383	0.167817	0.785319	1
ENSMUST00000008812	ENSMUSG00000008668	Rps18	transcript	25.8661	25.4398	0.023975	0.979232	1
ENSMUST00000008826	ENSMUSG00000008682	Rpl10	transcript	65.3287	93.1956	-0.512544	0.634568	1
ENSMUST00000008830	ENSMUSG00000094441	Zfp955a	transcript	10.0696	9.54198	0.0776471	0.888818	1
ENSMUST00000008878	ENSMUSG00000008734	Gprc5b	transcript	39.735	39.9648	-0.00832164	0.963702	1
ENSMUST00000008893	ENSMUSG00000024835	Coro1b	transcript	12.505	14.1056	-0.173767	0.688248	1
ENSMUST00000008907	ENSMUSG00000008763	Man1a2	transcript	24.9568	25.5512	-0.0339556	0.904999	1
ENSMUST00000008957	ENSMUSG00000008813	Tppp2	transcript	0	0	NA	1	1
ENSMUST00000008966	ENSMUSG00000008822	Acyp1	transcript	8.99472	9.59419	-0.0930821	0.869212	1
ENSMUST00000008987	ENSMUSG00000008843	Cldn13	transcript	0	0	NA	1	1
ENSMUST00000008991	ENSMUSG00000067889	Sptbn2	transcript	131.377	133.666	-0.0249222	0.922925	1
ENSMUST00000008995	ENSMUSG00000026313	Hdac4	transcript	1.23965	1.17681	0.0750587	0.918111	1
ENSMUST00000008999	ENSMUSG00000008855	Hdac5	transcript	8.44838	8.63005	-0.0306936	0.928236	1
ENSMUST00000009003	ENSMUSG00000008859	Rala	transcript	20.3106	21.4768	-0.0805485	0.825647	1
ENSMUST00000009018	ENSMUSG00000008874	Clec3a	transcript	0	0	NA	1	1
ENSMUST00000009036	ENSMUSG00000008892	Vdac3	transcript	59.7646	55.0611	0.118257	0.774049	1
ENSMUST00000009039	ENSMUSG00000058600	Rpl30	transcript	43.237	59.3362	-0.456649	0.536269	1
ENSMUST00000009058	ENSMUSG00000028970	Abcb1b	transcript	0.884958	0.782129	0.178202	0.797652	1
ENSMUST00000009099	ENSMUSG00000021144	Mta1	transcript	0.0971753	0.420611	-2.11382	0.118171	1
ENSMUST00000009102	ENSMUSG00000008958	Vps72	transcript	9.15461	9.69386	-0.0825736	0.854234	1
ENSMUST00000009120	ENSMUSG00000008976	Gabpa	transcript	5.20007	5.14199	0.0162028	0.987695	1
ENSMUST00000009138	ENSMUSG00000024006	Stk38	transcript	5.09848	5.49303	-0.107533	0.803627	1
ENSMUST00000009143	ENSMUSG00000008999	Bmp7	transcript	4.51204	3.92561	0.200864	0.685329	1
ENSMUST00000009157	ENSMUSG00000009013	Dynll1	transcript	60.1377	68.4613	-0.18702	0.599025	1
ENSMUST00000009174	ENSMUSG00000009030	Pdcl	transcript	5.99126	5.78163	0.0513819	0.926881	1
ENSMUST00000009191	ENSMUSG00000009047	Gm5965	transcript	0	0	NA	1	1
ENSMUST00000009214	ENSMUSG00000009070	Rsph14	transcript	0	0	NA	1	1
ENSMUST00000009219	ENSMUSG00000009075	Cabp7	transcript	24.1831	24.2223	-0.00233746	0.982433	1
ENSMUST00000009220	ENSMUSG00000009076	Zmat5	transcript	9.10565	9.67381	-0.0873232	0.868706	1
ENSMUST00000009234	ENSMUSG00000009090	Ap1b1	transcript	29.9408	28.1039	0.0913469	0.821086	1
ENSMUST00000009236	ENSMUSG00000009092	Derl3	transcript	0.547901	0.710591	-0.375104	0.634204	1
ENSMUST00000009241	ENSMUSG00000009097	Tbx1	transcript	0.509339	0.460378	0.145805	0.867455	1
ENSMUST00000009256	ENSMUSG00000009112	Bcl2l13	transcript	8.84804	9.1799	-0.0531204	0.877145	1
ENSMUST00000009259	ENSMUSG00000009115	Spatc1l	transcript	0	0.00911933	#NAME?	0.630432	1
ENSMUST00000009321	ENSMUSG00000022718	Dgcr8	transcript	4.58215	5.18053	-0.177074	0.68183	1
ENSMUST00000009329	ENSMUSG00000009185	Ccl8	transcript	0.28057	0.199631	0.491023	0.741686	1
ENSMUST00000009340	ENSMUSG00000026536	Mnda	transcript	0.027954	0.0433667	-0.633532	0.719522	1
ENSMUST00000009344	ENSMUSG00000000131	Xpo6	transcript	15.2744	14.686	0.0566732	0.904554	1
ENSMUST00000009354	ENSMUSG00000009210	2310007L24Rik	transcript	0	0.00521367	#NAME?	1	1
ENSMUST00000009356	ENSMUSG00000062345	Serpinb2	transcript	0	0	NA	1	1
ENSMUST00000009358	ENSMUSG00000009214	Tmem8c	transcript	0.202836	0.0862323	1.23401	0.204372	1
ENSMUST00000009390	ENSMUSG00000009246	Trpm5	transcript	0.006721	0.002593	1.37405	0.667115	1
ENSMUST00000009392	ENSMUSG00000009248	Ascl2	transcript	0.047842	0.0521443	-0.124233	1	1
ENSMUST00000009396	ENSMUSG00000000244	Tspan32	transcript	0	0	NA	1	1
ENSMUST00000009411	ENSMUSG00000052763	Zfp212	transcript	4.94231	4.77068	0.0509893	0.931594	1
ENSMUST00000009420	ENSMUSG00000052751	Repin1	transcript	2.41293	2.93716	-0.283635	0.630615	1
ENSMUST00000009425	ENSMUSG00000009281	Rarres2	transcript	4.72962	4.48226	0.0774981	0.921811	1
ENSMUST00000009435	ENSMUSG00000009291	Pttg1ip	transcript	18.1306	17.9569	0.0138913	0.991916	1
ENSMUST00000009522	ENSMUSG00000009378	Slc16a12	transcript	1.19223	1.10215	0.113351	0.8731	1
ENSMUST00000009530	ENSMUSG00000001131	Timp1	transcript	0.321262	0.102615	1.64651	0.194806	1
ENSMUST00000009538	ENSMUSG00000009394	Syn2	transcript	28.5932	25.8978	0.142846	0.723866	1
ENSMUST00000009550	ENSMUSG00000009406	Elk1	transcript	14.8113	14.8309	-0.00190574	0.980763	1
ENSMUST00000009617	ENSMUSG00000027895	Kcnc4	transcript	20.6051	21.5301	-0.063357	0.858515	1
ENSMUST00000009667	ENSMUSG00000030838	Ush1c	transcript	0.0190483	0.016856	0.176403	1	1
ENSMUST00000009679	ENSMUSG00000009535	Rnmt	transcript	13.2789	12.5951	0.0762775	0.863743	1
ENSMUST00000009689	ENSMUSG00000009545	Kcnq1	transcript	0.130096	0.163633	-0.330888	0.734622	1
ENSMUST00000009693	ENSMUSG00000009549	Srp14	transcript	65.9537	66.7323	-0.0169304	0.952307	1
ENSMUST00000009695	ENSMUSG00000009551	6330409D20Rik	transcript	0.59131	0.783126	-0.40533	0.615148	1
ENSMUST00000009699	ENSMUSG00000009555	Cdk9	transcript	23.8907	23.9939	-0.00621633	0.973277	1
ENSMUST00000009705	ENSMUSG00000026814	Eng	transcript	3.62987	1.52445	1.25163	0.0509662	1
ENSMUST00000009707	ENSMUSG00000009563	Tor2a	transcript	8.92791	8.72292	0.0335112	0.958687	1
ENSMUST00000009713	ENSMUSG00000009569	Mkl2	transcript	0.699267	6.2807	-3.16701	0.000748164	0.104404
ENSMUST00000009727	ENSMUSG00000022415	Syngr1	transcript	126.997	122.646	0.0502963	0.900788	1
ENSMUST00000009728	ENSMUSG00000022415	Syngr1	transcript	3.55341	3.19474	0.153507	0.834515	1
ENSMUST00000009732	ENSMUSG00000009588	St6galnac1	transcript	0	0.0110357	#NAME?	0.18528	1
ENSMUST00000009740	ENSMUSG00000009596	Taf7l	transcript	0.0381807	0.00822167	2.21534	0.178927	1
ENSMUST00000009772	ENSMUSG00000009628	Tex15	transcript	0.143305	0.160926	-0.167302	0.850122	1
ENSMUST00000009774	ENSMUSG00000009630	Ppp2cb	transcript	47.376	49.1505	-0.0530501	0.872001	1
ENSMUST00000009777	ENSMUSG00000009633	G0s2	transcript	2.62218	2.75962	-0.0737016	0.909796	1
ENSMUST00000009789	ENSMUSG00000019916	P4ha1	transcript	7.2045	12.2335	-0.763869	0.153131	1
ENSMUST00000009790	ENSMUSG00000009646	Pla2g12b	transcript	0	0	NA	1	1
ENSMUST00000009791	ENSMUSG00000009647	Mcu	transcript	0.160984	0.147056	0.130558	0.958455	1
ENSMUST00000009798	ENSMUSG00000009654	Oit3	transcript	0.0210647	0.008241	1.35393	0.416753	1
ENSMUST00000009814	ENSMUSG00000009670	Tex11	transcript	0.0636343	0.00345033	4.205	0.0892073	1
ENSMUST00000009831	ENSMUSG00000009687	Fxyd5	transcript	0.0884077	0.410133	-2.21385	0.0676415	1
ENSMUST00000009875	ENSMUSG00000009731	Kcnd1	transcript	2.19637	1.91811	0.195438	0.718106	1
ENSMUST00000009877	ENSMUSG00000009733	Tfcp2	transcript	6.06653	5.87302	0.0467682	0.934312	1
ENSMUST00000009885	ENSMUSG00000009741	Ubp1	transcript	5.26629	5.3271	-0.0165654	0.954287	1
ENSMUST00000009972	ENSMUSG00000009828	Ick	transcript	0.485573	0.353482	0.458049	0.62411	1
ENSMUST00000010007	ENSMUSG00000009863	Sdhb	transcript	71.2628	68.7877	0.0509989	0.910406	1
ENSMUST00000010020	ENSMUSG00000009876	Cox4i2	transcript	0.642305	0.789087	-0.296926	0.762101	1
ENSMUST00000010038	ENSMUSG00000009894	Snap47	transcript	84.9182	83.2447	0.0287163	0.956141	1
ENSMUST00000010044	ENSMUSG00000009900	Wnt3a	transcript	0.004368	0	Inf	0.631346	1
ENSMUST00000010049	ENSMUSG00000009905	Kdsr	transcript	8.59755	8.45427	0.0242454	0.970226	1
ENSMUST00000010085	ENSMUSG00000009941	Nxf2	transcript	0.00986133	0.0141047	-0.516318	0.776013	1
ENSMUST00000010127	ENSMUSG00000031397	Tktl1	transcript	0.049547	0.021267	1.22018	0.411516	1
ENSMUST00000010188	ENSMUSG00000010044	Zmynd10	transcript	0.922608	1.13647	-0.300766	0.677719	1
ENSMUST00000010189	ENSMUSG00000010045	Tmem115	transcript	12.826	12.6583	0.0189825	0.979131	1
ENSMUST00000010191	ENSMUSG00000010047	Hyal2	transcript	0.366537	1.06683	-1.5413	0.246579	1
ENSMUST00000010192	ENSMUSG00000010048	Ifrd2	transcript	2.19347	2.38597	-0.121363	0.833783	1
ENSMUST00000010195	ENSMUSG00000010051	Hyal1	transcript	0.899013	0.988363	-0.136698	0.838745	1
ENSMUST00000010198	ENSMUSG00000010054	Tusc2	transcript	32.9812	34.6506	-0.071233	0.844395	1
ENSMUST00000010201	ENSMUSG00000010057	Nprl2	transcript	11.1904	10.8381	0.0461478	0.935758	1
ENSMUST00000010205	ENSMUSG00000034837	Gnat1	transcript	0.0357963	0.00570367	2.64985	0.158235	1
ENSMUST00000010208	ENSMUSG00000010064	Slc38a3	transcript	1.38268	0.7178	0.945809	0.424045	1
ENSMUST00000010210	ENSMUSG00000010066	Cacna2d2	transcript	1.23081	1.8599	-0.595622	0.301352	1
ENSMUST00000010211	ENSMUSG00000010067	Rassf1	transcript	3.7819	4.69374	-0.311627	0.577694	1
ENSMUST00000010239	ENSMUSG00000010095	Slc3a2	transcript	10.9501	15.0857	-0.462245	0.280713	1
ENSMUST00000010241	ENSMUSG00000010097	Nxf1	transcript	3.30337	2.88836	0.193688	0.748991	1
ENSMUST00000010248	ENSMUSG00000010097	Nxf1	transcript	15.0072	13.9204	0.108451	0.847974	1
ENSMUST00000010249	ENSMUSG00000003680	Taf6l	transcript	2.82919	2.35228	0.266331	0.718684	1
ENSMUST00000010250	ENSMUSG00000024650	Slc22a6	transcript	2.14538	1.86997	0.198219	0.734542	1
ENSMUST00000010251	ENSMUSG00000063796	Slc22a8	transcript	2.88907	2.52512	0.194249	0.74209	1
ENSMUST00000010254	ENSMUSG00000010110	Stx5a	transcript	0.546399	0.714183	-0.386338	0.654293	1
ENSMUST00000010267	ENSMUSG00000010122	Slc47a1	transcript	1.19484	0.991965	0.268458	0.709636	1
ENSMUST00000010278	ENSMUSG00000000561	Wdr77	transcript	10.1307	10.6048	-0.0659796	0.862262	1
ENSMUST00000010279	ENSMUSG00000074344	Adora3	transcript	0.013739	0.00448567	1.61488	1	1
ENSMUST00000010280	ENSMUSG00000010136	Pifo	transcript	0.143325	0.00748033	4.26004	0.082021	1
ENSMUST00000010286	ENSMUSG00000010142	Tnfrsf13b	transcript	0.384366	0.274934	0.483394	0.557136	1
ENSMUST00000010298	ENSMUSG00000010154	Spire2	transcript	5.83118	6.18661	-0.0853602	0.847928	1
ENSMUST00000010319	ENSMUSG00000010175	Prox1	transcript	0.494482	0.642392	-0.377536	0.618058	1
ENSMUST00000010348	ENSMUSG00000079677	Fdx1l	transcript	20.3398	19.9881	0.025162	0.970937	1
ENSMUST00000010421	ENSMUSG00000010277	2610507B11Rik	transcript	45.2162	44.5188	0.0224243	0.966909	1
ENSMUST00000010434	ENSMUSG00000010290	AI597479	transcript	9.89043	9.80344	0.0127439	0.990614	1
ENSMUST00000010451	ENSMUSG00000010307	Tmem86a	transcript	6.67874	5.6211	0.248723	0.645984	1
ENSMUST00000010502	ENSMUSG00000010358	Ifi35	transcript	1.28379	1.20298	0.0937893	0.907693	1
ENSMUST00000010506	ENSMUSG00000010362	Rdm1	transcript	2.93173	2.23803	0.389525	0.580172	1
ENSMUST00000010520	ENSMUSG00000010376	Nedd8	transcript	65.8357	65.564	0.0059662	0.996598	1
ENSMUST00000010536	ENSMUSG00000010392	Gosr1	transcript	12.5626	12.2918	0.0314318	0.954678	1
ENSMUST00000010550	ENSMUSG00000010406	Mrpl52	transcript	20.342	23.6831	-0.219395	0.678457	1
ENSMUST00000010579	ENSMUSG00000010435	Spaca7	transcript	0	0	NA	1	1
ENSMUST00000010597	ENSMUSG00000010453	Kansl3	transcript	10.4579	10.9437	-0.065499	0.857486	1
ENSMUST00000010673	ENSMUSG00000010529	Gm266	transcript	1.41011	1.51016	-0.0988968	0.889594	1
ENSMUST00000010682	ENSMUSG00000010538	Tsacc	transcript	0.0348197	0.073545	-1.07872	0.531162	1
ENSMUST00000010698	ENSMUSG00000010554	Mettl16	transcript	0.015079	0.0499577	-1.72817	0.259512	1
ENSMUST00000010736	ENSMUSG00000010592	Dazl	transcript	1.19347	1.02094	0.22527	0.750996	1
ENSMUST00000010745	ENSMUSG00000010601	Apol7a	transcript	0	0	NA	1	1
ENSMUST00000010753	ENSMUSG00000010609	Psen2	transcript	0.0114757	0.026289	-1.19588	0.720205	1
ENSMUST00000010795	ENSMUSG00000010651	Acaa1b	transcript	0.573866	0.69935	-0.285301	0.710489	1
ENSMUST00000010804	ENSMUSG00000010660	Plcd1	transcript	3.10063	3.01166	0.0420016	0.954898	1
ENSMUST00000010807	ENSMUSG00000010663	Fads1	transcript	51.7713	52.1058	-0.00929098	0.960567	1
ENSMUST00000010899	ENSMUSG00000010755	Cars	transcript	1.98023	1.85964	0.0906483	0.896126	1
ENSMUST00000010904	ENSMUSG00000010760	Phlda2	transcript	0	0	NA	1	1
ENSMUST00000010940	ENSMUSG00000010796	Asz1	transcript	0	0	NA	1	1
ENSMUST00000010941	ENSMUSG00000010797	Wnt2	transcript	1.90034	1.69288	0.166779	0.805883	1
ENSMUST00000010969	ENSMUSG00000010825	Grid2ip	transcript	1.28974	1.38676	-0.104636	0.895849	1
ENSMUST00000010974	ENSMUSG00000010830	Kdelr3	transcript	0.18081	0.134848	0.423138	0.742856	1
ENSMUST00000010985	ENSMUSG00000010841	1700006E09Rik	transcript	0	0	NA	1	1
ENSMUST00000011029	ENSMUSG00000027679	Dnajc19	transcript	1.88839	1.04729	0.850492	0.309999	1
ENSMUST00000011055	ENSMUSG00000010911	Apip	transcript	5.13272	5.5165	-0.10403	0.855417	1
ENSMUST00000011058	ENSMUSG00000010914	Pdhx	transcript	15.0252	14.9814	0.00420722	0.992976	1
ENSMUST00000011152	ENSMUSG00000011008	Mcoln2	transcript	0.019738	0.0135263	0.545205	0.726341	1
ENSMUST00000011178	ENSMUSG00000011034	Slc5a1	transcript	0.018418	0.0168897	0.124976	0.931478	1
ENSMUST00000011262	ENSMUSG00000011118	Panx3	transcript	0	0.00651467	#NAME?	0.461412	1
ENSMUST00000011285	ENSMUSG00000042826	Fgf11	transcript	0.404848	0.476172	-0.2341	0.791311	1
ENSMUST00000011298	ENSMUSG00000011154	1700026D08Rik	transcript	0.26236	0.238216	0.139279	0.938184	1
ENSMUST00000011302	ENSMUSG00000011158	Brf1	transcript	9.67124	9.22128	0.0687339	0.892238	1
ENSMUST00000011315	ENSMUSG00000011171	Vipr2	transcript	0.585131	0.684115	-0.225478	0.750914	1
ENSMUST00000011391	ENSMUSG00000047257	Prss45	transcript	0.212491	0.167611	0.34228	0.683626	1
ENSMUST00000011398	ENSMUSG00000011254	Thg1l	transcript	2.32253	2.32221	0.000199825	0.988939	1
ENSMUST00000011400	ENSMUSG00000011256	Adam19	transcript	3.8068	3.92627	-0.0445795	0.907578	1
ENSMUST00000011407	ENSMUSG00000011263	Exoc3l2	transcript	0	0	NA	1	1
ENSMUST00000011445	ENSMUSG00000031495	Cd209d	transcript	0.0400473	0.040622	-0.0205551	1	1
ENSMUST00000011450	ENSMUSG00000011306	Sugp1	transcript	15.5642	13.2746	0.229557	0.604226	1
ENSMUST00000011492	ENSMUSG00000027710	Acad9	transcript	9.3968	8.63554	0.121883	0.789885	1
ENSMUST00000011493	ENSMUSG00000011349	Dmrtc2	transcript	0.00742233	0	Inf	0.628649	1
ENSMUST00000011526	ENSMUSG00000011382	Dhdh	transcript	3.7697	3.39771	0.149885	0.78226	1
ENSMUST00000011607	ENSMUSG00000011463	Cpb1	transcript	0.047067	0.018709	1.33098	0.424683	1
ENSMUST00000011623	ENSMUSG00000002668	Dennd1c	transcript	0.272275	0.204792	0.410901	0.659207	1
ENSMUST00000011733	ENSMUSG00000011589	Fsd1	transcript	15.3029	15.5954	-0.0273112	0.934813	1
ENSMUST00000011776	ENSMUSG00000011632	Pinlyp	transcript	0.031207	0.00660133	2.24104	0.413413	1
ENSMUST00000011877	ENSMUSG00000020315	Sptbn1	transcript	171.846	177.606	-0.0475683	0.867847	1
ENSMUST00000011895	ENSMUSG00000011751	Sptbn4	transcript	13.6539	13.5676	0.00914741	0.996607	1
ENSMUST00000011896	ENSMUSG00000011752	Pgam1	transcript	171.593	169.493	0.0177667	0.977677	1
ENSMUST00000011934	ENSMUSG00000051747	Ttn	transcript	0	0	NA	1	1
ENSMUST00000011981	ENSMUSG00000011837	Snapc2	transcript	12.2209	11.4608	0.0926385	0.855019	1
ENSMUST00000012028	ENSMUSG00000011884	Gltp	transcript	12.6228	11.6206	0.119352	0.80607	1
ENSMUST00000012104	ENSMUSG00000011960	Ccnt1	transcript	0.332458	0.291383	0.190254	0.844538	1
ENSMUST00000012152	ENSMUSG00000003166	Dgcr2	transcript	5.76473	5.04447	0.19255	0.77335	1
ENSMUST00000012161	ENSMUSG00000012017	Scarf2	transcript	0.9801	0.794608	0.302686	0.669062	1
ENSMUST00000012186	ENSMUSG00000012042	4930579F01Rik	transcript	0	0.007083	#NAME?	0.630399	1
ENSMUST00000012259	ENSMUSG00000012114	Med15	transcript	6.11446	5.22103	0.22789	0.634699	1
ENSMUST00000012262	ENSMUSG00000012117	Dhdds	transcript	9.41043	8.48176	0.149897	0.756552	1
ENSMUST00000012279	ENSMUSG00000022738	Gsc2	transcript	0.0843333	0.028705	1.5548	0.258506	1
ENSMUST00000012281	ENSMUSG00000032179	Bmp5	transcript	0.564825	0.584198	-0.0486518	0.949419	1
ENSMUST00000012314	ENSMUSG00000021510	A530054K11Rik	transcript	4.94133	5.03681	-0.027609	0.936555	1
ENSMUST00000012331	ENSMUSG00000012187	Mogat1	transcript	0.0197463	0.067944	-1.78276	0.40292	1
ENSMUST00000012348	ENSMUSG00000040562	Gstm2	transcript	1.06232	0.902312	0.235516	0.788077	1
ENSMUST00000012355	ENSMUSG00000012211	Tex22	transcript	0.195065	0.202885	-0.0567121	0.969808	1
ENSMUST00000012426	ENSMUSG00000012282	Wnt8a	transcript	0	0	NA	1	1
ENSMUST00000012440	ENSMUSG00000012296	Tjap1	transcript	0.991158	1.39452	-0.492578	0.482513	1
ENSMUST00000012540	ENSMUSG00000012396	Nanog	transcript	0.0223703	0.00600533	1.89727	0.469928	1
ENSMUST00000012566	ENSMUSG00000012422	Tmem167	transcript	0.480317	0.590346	-0.297572	0.729164	1
ENSMUST00000012580	ENSMUSG00000027615	Hps3	transcript	3.64251	2.03458	0.840202	0.123821	1
ENSMUST00000012587	ENSMUSG00000012443	Kif11	transcript	0.423454	0.330792	0.356281	0.643069	1
ENSMUST00000012612	ENSMUSG00000041164	Zmiz2	transcript	3.26058	4.69437	-0.5258	0.278198	1
ENSMUST00000012627	ENSMUSG00000012483	Rpa3	transcript	5.12295	5.36136	-0.0656265	0.909848	1
ENSMUST00000012664	ENSMUSG00000012520	Phox2b	transcript	0	0	NA	1	1
ENSMUST00000012679	ENSMUSG00000012535	Tnpo3	transcript	15.0272	15.8602	-0.0778344	0.828358	1
ENSMUST00000012725	ENSMUSG00000030446	Zfp273	transcript	0.725987	0.404147	0.845063	0.484288	1
ENSMUST00000012734	ENSMUSG00000029131	Dnajb6	transcript	0.66163	1.72375	-1.38146	0.0748689	1
ENSMUST00000012796	ENSMUSG00000012640	Zfp715	transcript	0.100695	0.128806	-0.355203	0.875907	1
ENSMUST00000012798	ENSMUSG00000039013	Siglecf	transcript	0.033913	0	Inf	0.104675	1
ENSMUST00000012847	ENSMUSG00000031494	Cd209a	transcript	0.464241	0.309739	0.583822	0.526861	1
ENSMUST00000012849	ENSMUSG00000012705	Retn	transcript	0.175371	0.134821	0.379369	0.775572	1
ENSMUST00000012873	ENSMUSG00000058093	AA987161	transcript	3.71334	3.79298	-0.0306154	0.931567	1
ENSMUST00000012921	ENSMUSG00000012777	Acpt	transcript	0	0	NA	1	1
ENSMUST00000013130	ENSMUSG00000020954	Strn3	transcript	11.8454	13.0583	-0.14064	0.716678	1
ENSMUST00000013220	ENSMUSG00000013076	Amotl1	transcript	5.64451	8.47485	-0.58634	0.401073	1
ENSMUST00000013227	ENSMUSG00000013083	2200002J24Rik	transcript	0	0	NA	1	1
ENSMUST00000013235	ENSMUSG00000013091	Tmem190	transcript	0.0250723	0.00914867	1.45446	0.771176	1
ENSMUST00000013262	ENSMUSG00000020472	Zkscan17	transcript	2.56272	2.27785	0.17	0.771343	1
ENSMUST00000013294	ENSMUSG00000013150	Gfod2	transcript	3.71553	3.70085	0.00571149	0.996874	1
ENSMUST00000013299	ENSMUSG00000013155	Enkd1	transcript	2.75924	2.8827	-0.0631483	0.918251	1
ENSMUST00000013302	ENSMUSG00000013158	4933405L10Rik	transcript	0.0538847	0.00886767	2.60325	0.128693	1
ENSMUST00000013304	ENSMUSG00000013160	Atp6v0d1	transcript	97.0395	95.3605	0.0251801	0.961785	1
ENSMUST00000013338	ENSMUSG00000064145	Arih2	transcript	10.8098	10.2455	0.0773415	0.869235	1
ENSMUST00000013455	ENSMUSG00000053054	Adh6a	transcript	0	0	NA	1	1
ENSMUST00000013458	ENSMUSG00000037797	Adh4	transcript	0.00941033	0	Inf	0.628616	1
ENSMUST00000013497	ENSMUSG00000013353	4931406B18Rik	transcript	0	0	NA	1	1
ENSMUST00000013559	ENSMUSG00000013415	Igf2bp1	transcript	0.001476	0.00316967	-1.10264	0.846228	1
ENSMUST00000013633	ENSMUSG00000008090	Fgfrl1	transcript	3.86813	4.03265	-0.060091	0.896807	1
ENSMUST00000013667	ENSMUSG00000013523	Bcas1	transcript	3.11494	2.27922	0.450662	0.459585	1
ENSMUST00000013693	ENSMUSG00000029213	Commd8	transcript	10.6354	9.81991	0.115093	0.803093	1
ENSMUST00000013706	ENSMUSG00000013562	4833413E03Rik	transcript	0	0	NA	1	1
ENSMUST00000013737	ENSMUSG00000013593	Ndufs2	transcript	78.5144	77.949	0.0104272	0.993939	1
ENSMUST00000013755	ENSMUSG00000013611	Snx31	transcript	0.169131	0.0981107	0.785662	0.396434	1
ENSMUST00000013759	ENSMUSG00000008200	Fnbp4	transcript	6.62818	6.11236	0.116885	0.804321	1
ENSMUST00000013766	ENSMUSG00000013622	Atraid	transcript	23.4278	19.9924	0.228765	0.640011	1
ENSMUST00000013771	ENSMUSG00000062077	Trim54	transcript	0.173175	0.0863797	1.00347	0.342398	1
ENSMUST00000013773	ENSMUSG00000013629	Cad	transcript	2.61058	2.6084	0.00120525	0.990318	1
ENSMUST00000013787	ENSMUSG00000013643	Lypd8	transcript	0	0	NA	1	1
ENSMUST00000013797	ENSMUSG00000013653	1810065E05Rik	transcript	0.021231	0	Inf	0.465987	1
ENSMUST00000013807	ENSMUSG00000013663	Pten	transcript	47.0653	48.5255	-0.044078	0.876156	1
ENSMUST00000013842	ENSMUSG00000013698	Pea15a	transcript	124.327	120.745	0.0421821	0.920541	1
ENSMUST00000013845	ENSMUSG00000013701	Timm23	transcript	17.6506	17.2801	0.0305993	0.960207	1
ENSMUST00000013851	ENSMUSG00000013707	Tnfaip8l2	transcript	1.18568	0.970849	0.28839	0.728124	1
ENSMUST00000013882	ENSMUSG00000005362	Crbn	transcript	24.2062	23.9004	0.0183373	0.980432	1
ENSMUST00000013886	ENSMUSG00000019254	Ppp1r12c	transcript	28.3214	29.1271	-0.0404694	0.898961	1
ENSMUST00000013910	ENSMUSG00000013766	Ly6g6e	transcript	0.433182	0.403785	0.101385	0.93827	1
ENSMUST00000013931	ENSMUSG00000013787	Ehmt2	transcript	14.2353	18.9891	-0.415695	0.351618	1
ENSMUST00000013949	ENSMUSG00000032000	Birc3	transcript	0.668355	0.641713	0.0586857	0.944111	1
ENSMUST00000013966	ENSMUSG00000013822	Elof1	transcript	24.3091	25.0382	-0.0426345	0.911274	1
ENSMUST00000013970	ENSMUSG00000025417	Pip4k2c	transcript	34.4005	36.8528	-0.0993445	0.770821	1
ENSMUST00000013995	ENSMUSG00000028125	Abca4	transcript	0.796752	0.968008	-0.280888	0.633369	1
ENSMUST00000014022	ENSMUSG00000013878	Rnf170	transcript	7.15201	6.25638	0.19302	0.673977	1
ENSMUST00000014058	ENSMUSG00000030693	Klk10	transcript	0.119867	0.0816087	0.554636	0.668778	1
ENSMUST00000014063	ENSMUSG00000044430	Klk12	transcript	0	0	NA	1	1
ENSMUST00000014065	ENSMUSG00000013921	Clip3	transcript	109.269	110.011	-0.00977166	0.957397	1
ENSMUST00000014072	ENSMUSG00000013928	Thap8	transcript	0	0	NA	1	1
ENSMUST00000014080	ENSMUSG00000013936	Myl2	transcript	0.250219	0.273498	-0.128341	0.923284	1
ENSMUST00000014089	ENSMUSG00000029510	Gpc2	transcript	0	0	NA	1	1
ENSMUST00000014118	ENSMUSG00000013974	Mcemp1	transcript	0.0513937	0.0827373	-0.686948	0.682194	1
ENSMUST00000014174	ENSMUSG00000014030	Pax5	transcript	0.065054	0.0617187	0.0759309	0.89077	1
ENSMUST00000014218	ENSMUSG00000014074	Rnf168	transcript	10.3662	10.188	0.0250192	0.968795	1
ENSMUST00000014220	ENSMUSG00000014075	Tctex1d2	transcript	7.30145	6.41551	0.186619	0.762937	1
ENSMUST00000014221	ENSMUSG00000014077	Chp1	transcript	46.0368	45.2131	0.0260455	0.961752	1
ENSMUST00000014248	ENSMUSG00000014104	Sval2	transcript	0	0	NA	1	1
ENSMUST00000014263	ENSMUSG00000054545	Ugt1a6a	transcript	0.305526	0.244442	0.321805	0.747416	1
ENSMUST00000014290	ENSMUSG00000026786	Apbb1ip	transcript	1.80158	1.42475	0.33855	0.605577	1
ENSMUST00000014321	ENSMUSG00000014177	Tvp23b	transcript	12.5252	11.4446	0.130168	0.789679	1
ENSMUST00000014339	ENSMUSG00000014195	Dnajc7	transcript	38.4806	39.013	-0.0198234	0.941548	1
ENSMUST00000014370	ENSMUSG00000014226	Cacybp	transcript	30.1875	32.0745	-0.0874783	0.81084	1
ENSMUST00000014389	ENSMUSG00000014245	Pigl	transcript	2.64438	2.68429	-0.0216096	0.961207	1
ENSMUST00000014421	ENSMUSG00000055204	Ankrd17	transcript	13.2818	17.4987	-0.397799	0.264921	1
ENSMUST00000014438	ENSMUSG00000014294	Ndufa2	transcript	55.4807	55.909	-0.0110934	0.963612	1
ENSMUST00000014445	ENSMUSG00000014301	Pam16	transcript	21.9396	22.0105	-0.00465724	0.981562	1
ENSMUST00000014447	ENSMUSG00000014303	Glis2	transcript	2.87513	3.00126	-0.0619415	0.89398	1
ENSMUST00000014457	ENSMUSG00000014313	Cox6c	transcript	175.235	176.956	-0.0140986	0.953585	1
ENSMUST00000014473	ENSMUSG00000014329	Bicc1	transcript	0.487584	0.785822	-0.688552	0.414507	1
ENSMUST00000014476	ENSMUSG00000089727	Klra8	transcript	0	0	NA	1	1
ENSMUST00000014499	ENSMUSG00000014355	Anapc1	transcript	13.1146	13.0509	0.00702332	0.997293	1
ENSMUST00000014505	ENSMUSG00000014361	Mertk	transcript	12.9706	13.1052	-0.0148959	0.952599	1
ENSMUST00000014545	ENSMUSG00000030851	Ldhc	transcript	0	0.00814633	#NAME?	0.631127	1
ENSMUST00000014546	ENSMUSG00000014402	Tsg101	transcript	18.1585	18.114	0.00353221	0.991861	1
ENSMUST00000014562	ENSMUSG00000014418	Hps5	transcript	1.35937	1.05479	0.365975	0.649879	1
ENSMUST00000014578	ENSMUSG00000059481	Plg	transcript	0.0246853	0.00459467	2.42562	0.393101	1
ENSMUST00000014597	ENSMUSG00000014453	Blk	transcript	0	0	NA	1	1
ENSMUST00000014614	ENSMUSG00000014470	Rnf166	transcript	12.1601	11.7499	0.0495048	0.928376	1
ENSMUST00000014640	ENSMUSG00000014496	Ankrd28	transcript	14.6559	12.9197	0.181914	0.657579	1
ENSMUST00000014642	ENSMUSG00000014498	Ankrd52	transcript	14.0391	14.7171	-0.0680427	0.839117	1
ENSMUST00000014647	ENSMUSG00000014503	Pkd2l2	transcript	0.319175	0.334794	-0.0689275	0.944767	1
ENSMUST00000014673	ENSMUSG00000014529	Tmbim7	transcript	0.0152493	0	Inf	0.252927	1
ENSMUST00000014683	ENSMUSG00000030173	Klra5	transcript	0	0	NA	1	1
ENSMUST00000014684	ENSMUSG00000061613	U2af1	transcript	11.4907	10.5547	0.122583	0.831638	1
ENSMUST00000014686	ENSMUSG00000014542	Clec4f	transcript	0	0	NA	1	1
ENSMUST00000014687	ENSMUSG00000014543	Klra17	transcript	0	0	NA	1	1
ENSMUST00000014691	ENSMUSG00000014547	Wdfy2	transcript	5.63401	5.55738	0.0197578	0.983812	1
ENSMUST00000014694	ENSMUSG00000014550	Zfyve20	transcript	13.1148	13.0439	0.00781912	0.999471	1
ENSMUST00000014698	ENSMUSG00000014554	Dguok	transcript	5.22509	5.17681	0.0133911	0.99807	1
ENSMUST00000014743	ENSMUSG00000014599	Csf1	transcript	3.16381	4.75054	-0.586429	0.224162	1
ENSMUST00000014747	ENSMUSG00000014603	Alx3	transcript	0.304497	0.343884	-0.175494	0.835901	1
ENSMUST00000014750	ENSMUSG00000014606	Slc25a11	transcript	36.4468	34.7489	0.068825	0.879228	1
ENSMUST00000014753	ENSMUSG00000014609	Chrne	transcript	0.028541	0.00615967	2.21211	0.206858	1
ENSMUST00000014777	ENSMUSG00000052560	Cpne8	transcript	2.40346	2.49672	-0.0549221	0.936809	1
ENSMUST00000014812	ENSMUSG00000014668	Chfr	transcript	2.33404	2.16226	0.110293	0.874394	1
ENSMUST00000014830	ENSMUSG00000014686	Ceacam16	transcript	0.0439103	0.0312223	0.491982	0.801998	1
ENSMUST00000014848	ENSMUSG00000014704	Hoxa2	transcript	0	0	NA	1	1
ENSMUST00000014891	ENSMUSG00000014747	Ankrd53	transcript	0.02805	0.0259803	0.110581	1	1
ENSMUST00000014892	ENSMUSG00000014748	Tex261	transcript	10.5178	10.7771	-0.0351432	0.921726	1
ENSMUST00000014911	ENSMUSG00000014767	Tbp	transcript	0.15489	0.294428	-0.926672	0.496438	1
ENSMUST00000014913	ENSMUSG00000014769	Psmb1	transcript	84.3224	75.4973	0.159491	0.692999	1
ENSMUST00000014917	ENSMUSG00000014773	Dll1	transcript	1.56896	1.82564	-0.2186	0.70214	1
ENSMUST00000014920	ENSMUSG00000014776	Nol3	transcript	5.22733	4.58307	0.189762	0.709588	1
ENSMUST00000014922	ENSMUSG00000014778	Fhod1	transcript	0.808531	0.90743	-0.166483	0.792738	1
ENSMUST00000014927	ENSMUSG00000014782	Plekhg4	transcript	0.103688	0.183902	-0.826693	0.355962	1
ENSMUST00000014957	ENSMUSG00000014813	Stc1	transcript	0.992558	1.16269	-0.228239	0.710908	1
ENSMUST00000014981	ENSMUSG00000014837	4931428F04Rik	transcript	2.0711	1.82712	0.180821	0.806301	1
ENSMUST00000014990	ENSMUSG00000014846	Tppp3	transcript	20.9428	19.0066	0.139956	0.790313	1
ENSMUST00000014996	ENSMUSG00000014852	Adamts13	transcript	0.00321767	0.00844533	-1.39214	0.552044	1
ENSMUST00000015000	ENSMUSG00000014856	Tmem208	transcript	11.9791	13.6989	-0.193545	0.706139	1
ENSMUST00000015003	ENSMUSG00000014859	E2f4	transcript	9.61732	10.6298	-0.144414	0.738484	1
ENSMUST00000015011	ENSMUSG00000014867	Surf4	transcript	18.4888	18.128	0.0284376	0.959024	1
ENSMUST00000015017	ENSMUSG00000014873	Surf2	transcript	9.9881	10.0236	-0.00511301	0.982798	1
ENSMUST00000015049	ENSMUSG00000014905	Dnajb9	transcript	26.2023	25.9811	0.0122301	0.99344	1
ENSMUST00000015100	ENSMUSG00000014956	Ppp1cb	transcript	70.7107	69.7283	0.020184	0.971718	1
ENSMUST00000015107	ENSMUSG00000020694	Tlk2	transcript	0.841874	0.959709	-0.188993	0.774711	1
ENSMUST00000015124	ENSMUSG00000014980	Tsen15	transcript	7.15088	7.19048	-0.00796749	0.97587	1
ENSMUST00000015137	ENSMUSG00000029674	Limk1	transcript	10.6873	12.2437	-0.196135	0.632755	1
ENSMUST00000015138	ENSMUSG00000029675	Eln	transcript	2.10228	1.88775	0.155291	0.821307	1
ENSMUST00000015146	ENSMUSG00000015002	Efr3a	transcript	35.3027	34.7773	0.0216333	0.968536	1
ENSMUST00000015157	ENSMUSG00000015013	Trappc2l	transcript	36.2643	36.7768	-0.0202457	0.949155	1
ENSMUST00000015160	ENSMUSG00000015016	Acsf3	transcript	5.89597	5.44899	0.113742	0.832196	1
ENSMUST00000015171	ENSMUSG00000015027	Galns	transcript	1.78265	1.34282	0.408753	0.53727	1
ENSMUST00000015197	ENSMUSG00000015053	Gata2	transcript	1.69019	1.23162	0.456629	0.470551	1
ENSMUST00000015227	ENSMUSG00000015083	C8g	transcript	0.0538473	0.057485	-0.0943107	1	1
ENSMUST00000015234	ENSMUSG00000015090	Ptgds	transcript	118.858	74.366	0.676519	0.2611	1
ENSMUST00000015236	ENSMUSG00000015092	Edf1	transcript	37.507	42.2294	-0.171089	0.683273	1
ENSMUST00000015239	ENSMUSG00000015095	Fbxw5	transcript	20.026	19.3338	0.0507557	0.917666	1
ENSMUST00000015256	ENSMUSG00000015112	Slc25a13	transcript	1.061	0.31561	1.74921	0.241518	1
ENSMUST00000015267	ENSMUSG00000024171	Prss28	transcript	0	0	NA	1	1
ENSMUST00000015271	ENSMUSG00000015127	Unkl	transcript	4.05715	6.45834	-0.670697	0.342762	1
ENSMUST00000015277	ENSMUSG00000015133	Lrrk1	transcript	1.14956	1.11467	0.0444723	0.94934	1
ENSMUST00000015278	ENSMUSG00000015134	Aldh1a3	transcript	0.242275	0.201704	0.264403	0.762918	1
ENSMUST00000015333	ENSMUSG00000015189	Casd1	transcript	20.9009	18.5497	0.172171	0.669185	1
ENSMUST00000015346	ENSMUSG00000015202	Cnksr3	transcript	1.93047	2.09738	-0.119641	0.824618	1
ENSMUST00000015358	ENSMUSG00000015214	Mtmr1	transcript	8.98954	9.02003	-0.00488467	0.974354	1
ENSMUST00000015361	ENSMUSG00000015217	Hmgb3	transcript	0	0.113029	#NAME?	0.039714	1
ENSMUST00000015368	ENSMUSG00000066097	Cyp2j11	transcript	0	0.0191947	#NAME?	0.113318	1
ENSMUST00000015391	ENSMUSG00000015247	Nipsnap3b	transcript	5.07756	4.85309	0.0652311	0.920772	1
ENSMUST00000015394	ENSMUSG00000050578	Mmp13	transcript	0.00450867	0.020958	-2.21673	0.548773	1
ENSMUST00000015427	ENSMUSG00000031399	Fam3a	transcript	0	0	NA	1	1
ENSMUST00000015433	ENSMUSG00000015289	Lage3	transcript	5.3051	4.2782	0.310375	0.648222	1
ENSMUST00000015435	ENSMUSG00000015291	Gdi1	transcript	145.119	141.981	0.0315449	0.945797	1
ENSMUST00000015449	ENSMUSG00000015305	Sash1	transcript	16.2937	16.9599	-0.0578098	0.858377	1
ENSMUST00000015456	ENSMUSG00000015312	Gadd45b	transcript	6.10073	6.68163	-0.131218	0.804679	1
ENSMUST00000015460	ENSMUSG00000015316	Slamf1	transcript	0.045502	0.0744783	-0.710891	0.584429	1
ENSMUST00000015467	ENSMUSG00000052310	Slc39a1	transcript	16.2671	14.383	0.1776	0.689382	1
ENSMUST00000015481	ENSMUSG00000015337	Endog	transcript	11.6398	9.6196	0.275019	0.607092	1
ENSMUST00000015484	ENSMUSG00000015340	Cybb	transcript	0.204797	0.138065	0.568846	0.505966	1
ENSMUST00000015486	ENSMUSG00000015342	Xk	transcript	5.86946	5.56104	0.0778733	0.873252	1
ENSMUST00000015498	ENSMUSG00000015354	Pcolce2	transcript	1.64394	1.45246	0.17866	0.773218	1
ENSMUST00000015499	ENSMUSG00000015355	Cd48	transcript	0.00918267	0.0698967	-2.92824	0.306576	1
ENSMUST00000015501	ENSMUSG00000015357	Clpx	transcript	9.32614	8.38141	0.154087	0.741945	1
ENSMUST00000015509	ENSMUSG00000015365	Mov10l1	transcript	0	0	NA	1	1
ENSMUST00000015511	ENSMUSG00000030123	Plxnd1	transcript	12.8273	12.89	-0.00703542	0.965981	1
ENSMUST00000015540	ENSMUSG00000015396	Cd83	transcript	6.92105	6.25555	0.145854	0.778503	1
ENSMUST00000015545	ENSMUSG00000015401	Tmem27	transcript	0	0	NA	1	1
ENSMUST00000015576	ENSMUSG00000022226	Mcpt2	transcript	0	0	NA	1	1
ENSMUST00000015578	ENSMUSG00000040284	Gzmg	transcript	0	0	NA	1	1
ENSMUST00000015581	ENSMUSG00000015437	Gzmb	transcript	0.0172257	0	Inf	0.137374	1
ENSMUST00000015583	ENSMUSG00000040314	Ctsg	transcript	0	0.0288343	#NAME?	0.305574	1
ENSMUST00000015585	ENSMUSG00000079186	Gzmc	transcript	0	0	NA	1	1
ENSMUST00000015587	ENSMUSG00000015443	Gzmn	transcript	0	0	NA	1	1
ENSMUST00000015594	ENSMUSG00000022157	Mcpt8	transcript	0	0	NA	1	1
ENSMUST00000015596	ENSMUSG00000015452	Ager	transcript	0.109868	0.086515	0.344749	0.803169	1
ENSMUST00000015605	ENSMUSG00000015461	Atf6b	transcript	17.3716	18.2052	-0.0676232	0.855303	1
ENSMUST00000015611	ENSMUSG00000015467	Egfl8	transcript	0.615633	0.596346	0.045921	0.975893	1
ENSMUST00000015612	ENSMUSG00000015468	Notch4	transcript	1.97392	1.7763	0.152187	0.780268	1
ENSMUST00000015620	ENSMUSG00000015476	Prrt1	transcript	33.3369	33.4778	-0.00608481	0.97064	1
ENSMUST00000015622	ENSMUSG00000015478	Rnf5	transcript	21.922	22.0395	-0.0077115	0.970322	1
ENSMUST00000015628	ENSMUSG00000015484	Fam163a	transcript	2.16261	2.50526	-0.212184	0.697597	1
ENSMUST00000015645	ENSMUSG00000015501	Hivep2	transcript	32.5923	36.1487	-0.149412	0.643115	1
ENSMUST00000015663	ENSMUSG00000015519	2310057J18Rik	transcript	0	0	NA	1	1
ENSMUST00000015664	ENSMUSG00000028111	Ctsk	transcript	1.51054	1.3278	0.186029	0.806006	1
ENSMUST00000015666	ENSMUSG00000015522	Arnt	transcript	0.00696567	0.003921	0.82904	0.795392	1
ENSMUST00000015667	ENSMUSG00000038642	Ctss	transcript	19.4356	12.4086	0.647361	0.168008	1
ENSMUST00000015680	ENSMUSG00000015536	Mocs2	transcript	4.25784	1.47942	1.52509	0.347732	1
ENSMUST00000015712	ENSMUSG00000015568	Lpl	transcript	6.49333	6.48156	0.00261737	0.995424	1
ENSMUST00000015719	ENSMUSG00000015575	Atp6v0e	transcript	13.3381	13.2069	0.0142651	0.990222	1
ENSMUST00000015723	ENSMUSG00000015579	Nkx2-5	transcript	0	0	NA	1	1
ENSMUST00000015725	ENSMUSG00000024191	Bnip1	transcript	8.84116	9.10597	-0.0425769	0.928221	1
ENSMUST00000015749	ENSMUSG00000015605	Srf	transcript	12.8101	14.5043	-0.1792	0.641251	1
ENSMUST00000015771	ENSMUSG00000015627	Gata5	transcript	0	0	NA	1	1
ENSMUST00000015791	ENSMUSG00000015647	Lama5	transcript	1.18461	1.18582	-0.00146921	0.981908	1
ENSMUST00000015796	ENSMUSG00000015652	Steap1	transcript	0.325883	0.688127	-1.07832	0.208641	1
ENSMUST00000015797	ENSMUSG00000015653	Steap2	transcript	0.545313	0.604178	-0.147888	0.834013	1
ENSMUST00000015800	ENSMUSG00000015656	Hspa8	transcript	672.416	770.882	-0.197155	0.561901	1
ENSMUST00000015812	ENSMUSG00000015668	Pdzd11	transcript	0.697555	0.46807	0.575583	0.486548	1
ENSMUST00000015816	ENSMUSG00000015672	Mrpl32	transcript	12.2879	13.1731	-0.100351	0.839288	1
ENSMUST00000015829	ENSMUSG00000030861	Acadsb	transcript	17.7799	17.1543	0.0516763	0.913253	1
ENSMUST00000015841	ENSMUSG00000015697	Setdb1	transcript	1.2747	0.957372	0.413001	0.667461	1
ENSMUST00000015846	ENSMUSG00000015702	Anxa9	transcript	0	0	NA	1	1
ENSMUST00000015855	ENSMUSG00000015711	Prune	transcript	8.18101	8.03636	0.0257375	0.968736	1
ENSMUST00000015858	ENSMUSG00000015714	Cers2	transcript	14.1396	13.2025	0.0989241	0.836002	1
ENSMUST00000015866	ENSMUSG00000015721	Nlrp5	transcript	0.00383933	0	Inf	0.631709	1
ENSMUST00000015877	ENSMUSG00000015733	Capza2	transcript	77.5414	75.2104	0.0440361	0.919364	1
ENSMUST00000015889	ENSMUSG00000015745	Plekho1	transcript	5.80275	7.69189	-0.406602	0.4128	1
ENSMUST00000015891	ENSMUSG00000015747	Vps45	transcript	13.2279	12.8148	0.0457752	0.9301	1
ENSMUST00000015892	ENSMUSG00000015748	Prpf3	transcript	2.65424	2.44588	0.117941	0.855097	1
ENSMUST00000015893	ENSMUSG00000015749	Anp32e	transcript	9.2614	11.9923	-0.372806	0.513277	1
ENSMUST00000015894	ENSMUSG00000015750	Aph1a	transcript	9.89237	9.74157	0.022163	0.975103	1
ENSMUST00000015901	ENSMUSG00000015757	Ppil4	transcript	9.50383	9.85666	-0.052591	0.888282	1
ENSMUST00000015903	ENSMUSG00000015759	Cnih1	transcript	26.3097	26.774	-0.0252412	0.936257	1
ENSMUST00000015920	ENSMUSG00000015776	Med22	transcript	8.20101	9.25689	-0.174726	0.7583	1
ENSMUST00000015934	ENSMUSG00000015790	Surf1	transcript	9.70717	10.5321	-0.117674	0.809631	1
ENSMUST00000015941	ENSMUSG00000042118	Bhmt2	transcript	0.041302	0.0473023	-0.1957	1	1
ENSMUST00000015950	ENSMUSG00000015806	Qdpr	transcript	66.9947	60.0731	0.157328	0.69679	1
ENSMUST00000015981	ENSMUSG00000015837	Sqstm1	transcript	22.9204	19.1852	0.256642	0.53908	1
ENSMUST00000015987	ENSMUSG00000015843	Rxrg	transcript	5.88303	5.594	0.0726793	0.900452	1
ENSMUST00000015994	ENSMUSG00000015850	Adamtsl4	transcript	2.79005	1.40249	0.992305	0.0896338	1
ENSMUST00000015998	ENSMUSG00000015854	Cd5l	transcript	0	0	NA	1	1
ENSMUST00000016023	ENSMUSG00000015879	Fam184b	transcript	1.75735	1.78378	-0.0215402	0.962058	1
ENSMUST00000016026	ENSMUSG00000015882	Lcorl	transcript	0.9061	0.000625	10.5016	0.000270161	0.0555062
ENSMUST00000016033	ENSMUSG00000015889	Lta4h	transcript	12.6503	11.7298	0.108992	0.819881	1
ENSMUST00000016034	ENSMUSG00000015890	Amdhd1	transcript	0.0445753	0.0139667	1.67426	0.256931	1
ENSMUST00000016072	ENSMUSG00000027422	Rrbp1	transcript	6.40679	6.51434	-0.0240191	0.939136	1
ENSMUST00000016081	ENSMUSG00000015937	H2afy	transcript	16.6868	18.5755	-0.154691	0.702533	1
ENSMUST00000016086	ENSMUSG00000015942	Gtf2ird2	transcript	4.43803	4.13633	0.101567	0.843851	1
ENSMUST00000016087	ENSMUSG00000015943	Bola1	transcript	3.15515	2.50754	0.331431	0.65787	1
ENSMUST00000016088	ENSMUSG00000015944	Gatsl2	transcript	25.2142	28.5244	-0.177959	0.598445	1
ENSMUST00000016094	ENSMUSG00000015950	Ncf1	transcript	0.185688	0.354873	-0.934425	0.51779	1
ENSMUST00000016105	ENSMUSG00000015961	Adss	transcript	24.5683	23.6791	0.0531839	0.910084	1
ENSMUST00000016106	ENSMUSG00000015962	1700016C15Rik	transcript	0.0332317	0	Inf	0.369151	1
ENSMUST00000016110	ENSMUSG00000015966	Il17rb	transcript	0.463379	0.210563	1.13794	0.434984	1
ENSMUST00000016115	ENSMUSG00000015971	Actr8	transcript	17.5634	17.1022	0.0383854	0.943127	1
ENSMUST00000016124	ENSMUSG00000015980	Lrrc27	transcript	1.63046	1.80393	-0.14586	0.81751	1
ENSMUST00000016125	ENSMUSG00000015981	Stk32c	transcript	43.7762	37.4135	0.226589	0.575298	1
ENSMUST00000016138	ENSMUSG00000015994	Fnta	transcript	21.3002	20.0694	0.0858647	0.856264	1
ENSMUST00000016143	ENSMUSG00000029636	Wasf3	transcript	31.9669	31.9903	-0.00105855	0.980239	1
ENSMUST00000016144	ENSMUSG00000021759	Ppap2a	transcript	3.88361	4.9999	-0.3645	0.53677	1
ENSMUST00000016168	ENSMUSG00000016024	Lbp	transcript	1.09206	1.48897	-0.447262	0.515226	1
ENSMUST00000016172	ENSMUSG00000016028	Celsr1	transcript	1.35969	1.45814	-0.100847	0.817192	1
ENSMUST00000016231	ENSMUSG00000016087	Fli1	transcript	2.09812	2.23407	-0.0905814	0.864476	1
ENSMUST00000016279	ENSMUSG00000041132	N4bp2l1	transcript	8.45032	8.40567	0.00764361	0.999764	1
ENSMUST00000016294	ENSMUSG00000016150	Tenm1	transcript	3.65056	2.18038	0.74354	0.29507	1
ENSMUST00000016309	ENSMUSG00000006301	Tmbim1	transcript	1.49058	1.68212	-0.174402	0.784662	1
ENSMUST00000016315	ENSMUSG00000026639	Lamb3	transcript	0.011529	0.012078	-0.0671142	1	1
ENSMUST00000016323	ENSMUSG00000016179	Camk1g	transcript	13.7744	14.0084	-0.0243079	0.937849	1
ENSMUST00000016338	ENSMUSG00000016194	Hsd11b1	transcript	1.50514	1.86729	-0.311042	0.64841	1
ENSMUST00000016344	ENSMUSG00000016200	Syt14	transcript	1.88909	1.81295	0.0593557	0.941204	1
ENSMUST00000016383	ENSMUSG00000016239	Lonrf3	transcript	5.85707	5.83667	0.00503265	0.993132	1
ENSMUST00000016396	ENSMUSG00000016252	Atp5e	transcript	118.114	132.459	-0.165359	0.672864	1
ENSMUST00000016397	ENSMUSG00000016253	Nelfcd	transcript	0.0324887	0.190534	-2.55204	0.0680585	1
ENSMUST00000016399	ENSMUSG00000016255	Tubb1	transcript	0.107474	0.0672317	0.67677	0.652289	1
ENSMUST00000016400	ENSMUSG00000016256	Ctsz	transcript	21.122	14.9068	0.502777	0.262605	1
ENSMUST00000016401	ENSMUSG00000016257	Slmo2	transcript	17.8837	18.113	-0.0183778	0.952276	1
ENSMUST00000016406	ENSMUSG00000016262	Sertad4	transcript	0.00266067	0.004405	-0.727354	1	1
ENSMUST00000016427	ENSMUSG00000016283	H2-M2	transcript	0	0.00781067	#NAME?	0.630376	1
ENSMUST00000016452	ENSMUSG00000016308	Ube2a	transcript	14.9575	17.0197	-0.186337	0.657512	1
ENSMUST00000016463	ENSMUSG00000016319	Slc25a5	transcript	110.234	115.898	-0.0722854	0.824729	1
ENSMUST00000016471	ENSMUSG00000016327	Atp1b4	transcript	0.00294333	0	Inf	0.458615	1
ENSMUST00000016488	ENSMUSG00000016344	Ppdpf	transcript	7.39835	7.02214	0.0752923	0.904385	1
ENSMUST00000016491	ENSMUSG00000016346	Kcnq2	transcript	2.35272	2.04245	0.204026	0.742758	1
ENSMUST00000016498	ENSMUSG00000027579	Srms	transcript	0.135804	0.114812	0.242256	0.805412	1
ENSMUST00000016511	ENSMUSG00000038751	Ptk6	transcript	0.00689033	0.0126343	-0.874704	0.745592	1
ENSMUST00000016530	ENSMUSG00000016386	Mpped2	transcript	0.144804	0.184161	-0.346865	0.821233	1
ENSMUST00000016553	ENSMUSG00000016409	Nkap	transcript	4.37511	4.63703	-0.0838816	0.839039	1
ENSMUST00000016569	ENSMUSG00000034021	Pds5b	transcript	13.0523	11.478	0.185432	0.648461	1
ENSMUST00000016571	ENSMUSG00000016427	Ndufa1	transcript	51.6362	53.8623	-0.0608948	0.878184	1
ENSMUST00000016631	ENSMUSG00000016487	Ppfibp1	transcript	1.47218	1.49707	-0.0241931	0.952671	1
ENSMUST00000016638	ENSMUSG00000016494	Cd34	transcript	5.18795	4.25387	0.286389	0.596289	1
ENSMUST00000016639	ENSMUSG00000016495	Plgrkt	transcript	0.100713	0.649611	-2.68933	0.0873828	1
ENSMUST00000016640	ENSMUSG00000016496	Cd274	transcript	0.844569	0.546691	0.62749	0.373405	1
ENSMUST00000016654	ENSMUSG00000016510	Mtif3	transcript	0.275591	0.192738	0.515883	0.627102	1
ENSMUST00000016664	ENSMUSG00000016520	Lnx2	transcript	1.53518	1.52148	0.0129262	0.990584	1
ENSMUST00000016668	ENSMUSG00000016524	Il19	transcript	0	0	NA	1	1
ENSMUST00000016670	ENSMUSG00000016526	Dyrk3	transcript	3.69811	4.12852	-0.158835	0.744526	1
ENSMUST00000016672	ENSMUSG00000016528	Mapkapk2	transcript	10.3472	10.9779	-0.0853626	0.831212	1
ENSMUST00000016673	ENSMUSG00000016529	Il10	transcript	0	0.00856033	#NAME?	0.46142	1
ENSMUST00000016678	ENSMUSG00000016534	Lamp2	transcript	7.0584	6.73061	0.068605	0.909948	1
ENSMUST00000016680	ENSMUSG00000031446	Cul4a	transcript	17.2108	17.1502	0.00509167	0.994354	1
ENSMUST00000016681	ENSMUSG00000031095	Cul4b	transcript	14.5276	15.106	-0.056333	0.875599	1
ENSMUST00000016696	ENSMUSG00000016552	Foxred2	transcript	2.27453	2.08022	0.128834	0.835622	1
ENSMUST00000016703	ENSMUSG00000016559	H3f3b	transcript	57.8648	43.7279	0.404131	0.368388	1
ENSMUST00000016768	ENSMUSG00000016624	Phf21b	transcript	0.0884053	0.068357	0.371044	0.729385	1
ENSMUST00000016771	ENSMUSG00000022443	Myh9	transcript	19.2432	20.6812	-0.103968	0.755976	1
ENSMUST00000016781	ENSMUSG00000016637	Ift27	transcript	8.36587	8.44854	-0.0141878	0.967791	1
ENSMUST00000016897	ENSMUSG00000022442	Ttll1	transcript	12.7628	13.3507	-0.0649675	0.867777	1
ENSMUST00000016901	ENSMUSG00000016757	Ttll12	transcript	4.72074	4.58364	0.0425202	0.941871	1
ENSMUST00000016902	ENSMUSG00000016758	Bik	transcript	0.0424323	0.0826927	-0.962595	0.659869	1
ENSMUST00000016907	ENSMUSG00000016763	Scube1	transcript	2.10857	1.98395	0.0878918	0.887781	1
ENSMUST00000016951	ENSMUSG00000051029	Serpinb1b	transcript	0.633017	0.683711	-0.111142	0.886105	1
ENSMUST00000016977	ENSMUSG00000016833	Mrps18c	transcript	14.2591	14.3899	-0.0131773	0.971654	1
ENSMUST00000017086	ENSMUSG00000016942	Tmprss6	transcript	0.231318	0.159427	0.536987	0.516094	1
ENSMUST00000017090	ENSMUSG00000016946	Kctd5	transcript	7.19731	7.29328	-0.0191103	0.954463	1
ENSMUST00000017126	ENSMUSG00000016982	Pom121l2	transcript	0.008355	0.00789233	0.0821879	1	1
ENSMUST00000017142	ENSMUSG00000016998	Svs4	transcript	0	0	NA	1	1
ENSMUST00000017144	ENSMUSG00000017000	Svs6	transcript	0	0	NA	1	1
ENSMUST00000017147	ENSMUSG00000017003	Svs3a	transcript	0	0	NA	1	1
ENSMUST00000017148	ENSMUSG00000017004	Svs5	transcript	0	0	NA	1	1
ENSMUST00000017151	ENSMUSG00000017007	Rbpjl	transcript	0.278691	0.193195	0.528613	0.56444	1
ENSMUST00000017153	ENSMUSG00000017009	Sdc4	transcript	45.1511	45.5152	-0.0115865	0.956726	1
ENSMUST00000017188	ENSMUSG00000060147	Serpinb6a	transcript	4.8233	1.9105	1.33607	0.419067	1
ENSMUST00000017193	ENSMUSG00000017049	Ccdc70	transcript	0	0	NA	1	1
ENSMUST00000017208	ENSMUSG00000017064	Prl5a1	transcript	0	0	NA	1	1
ENSMUST00000017255	ENSMUSG00000020913	Krt24	transcript	0.00667233	0.00607133	0.136178	1	1
ENSMUST00000017270	ENSMUSG00000053654	Krt42	transcript	0.007725	0.00727233	0.0871166	1	1
ENSMUST00000017276	ENSMUSG00000017132	Cyth1	transcript	15.6634	16.0124	-0.031795	0.921044	1
ENSMUST00000017288	ENSMUSG00000017144	Rnd3	transcript	5.58986	6.01171	-0.104965	0.809675	1
ENSMUST00000017290	ENSMUSG00000017146	Brca1	transcript	0.397417	0.321272	0.30686	0.67746	1
ENSMUST00000017309	ENSMUSG00000017165	Gast	transcript	0.0891213	0.052817	0.754768	1	1
ENSMUST00000017316	ENSMUSG00000019326	Aoc3	transcript	0	0	NA	1	1
ENSMUST00000017332	ENSMUSG00000017188	Coa3	transcript	31.0876	28.5998	0.120337	0.797586	1
ENSMUST00000017339	ENSMUSG00000017195	Zpbp2	transcript	0	0	NA	1	1
ENSMUST00000017348	ENSMUSG00000017204	Gsdma	transcript	0.00946433	0.0189897	-1.00464	0.559617	1
ENSMUST00000017354	ENSMUSG00000017210	Med24	transcript	16.054	16.0908	-0.00330783	0.974333	1
ENSMUST00000017355	ENSMUSG00000017211	Gsdma2	transcript	0	0	NA	1	1
ENSMUST00000017365	ENSMUSG00000017221	Psmd3	transcript	44.4977	42.6634	0.0607319	0.889172	1
ENSMUST00000017384	ENSMUSG00000078676	Casc3	transcript	0.0213047	0.0433377	-1.02445	0.412904	1
ENSMUST00000017408	ENSMUSG00000017264	Exosc10	transcript	7.02317	6.24297	0.16989	0.729156	1
ENSMUST00000017430	ENSMUSG00000017286	Glod4	transcript	16.1966	15.7906	0.0366195	0.947189	1
ENSMUST00000017435	ENSMUSG00000017291	Taok1	transcript	1.02968	1.64149	-0.672816	0.200713	1
ENSMUST00000017443	ENSMUSG00000017299	Dnttip1	transcript	8.15886	8.78091	-0.106003	0.814036	1
ENSMUST00000017451	ENSMUSG00000017307	Acot8	transcript	0.146701	0	Inf	0.0433728	1
ENSMUST00000017453	ENSMUSG00000017309	Cd300lg	transcript	0.041879	0	Inf	0.0886829	1
ENSMUST00000017454	ENSMUSG00000017310	Spint4	transcript	0.016059	0	Inf	0.631328	1
ENSMUST00000017455	ENSMUSG00000017311	Pyy	transcript	0	0	NA	1	1
ENSMUST00000017458	ENSMUSG00000017314	Mpp2	transcript	25.6932	29.7752	-0.212726	0.55049	1
ENSMUST00000017460	ENSMUSG00000017316	Ppy	transcript	0	0	NA	1	1
ENSMUST00000017488	ENSMUSG00000017344	Vtn	transcript	19.5302	18.5945	0.0708342	0.883806	1
ENSMUST00000017530	ENSMUSG00000017386	Traf4	transcript	2.5781	2.74395	-0.0899451	0.869792	1
ENSMUST00000017534	ENSMUSG00000017390	Aldoc	transcript	114.018	104.175	0.130251	0.721704	1
ENSMUST00000017544	ENSMUSG00000017400	Stac2	transcript	24.0061	23.4584	0.0332993	0.949083	1
ENSMUST00000017548	ENSMUSG00000017404	Rpl19	transcript	192.297	187.515	0.0363258	0.938215	1
ENSMUST00000017549	ENSMUSG00000017405	Nek8	transcript	0.685705	0.588402	0.220787	0.77148	1
ENSMUST00000017552	ENSMUSG00000020882	Cacnb1	transcript	33.036	35.3637	-0.0982316	0.77392	1
ENSMUST00000017561	ENSMUSG00000017417	Plxdc1	transcript	9.83705	9.3562	0.072303	0.883002	1
ENSMUST00000017562	ENSMUSG00000017418	Arl5b	transcript	0.0186903	0.0170943	0.128774	0.954029	1
ENSMUST00000017567	ENSMUSG00000017421	Zfp207	transcript	0.5038	0.449437	0.164733	0.856049	1
ENSMUST00000017572	ENSMUSG00000017428	Psmd11	transcript	26.0266	25.9732	0.00296284	0.989661	1
ENSMUST00000017576	ENSMUSG00000025576	Rbfox3	transcript	3.66476	3.37547	0.118629	0.834683	1
ENSMUST00000017590	ENSMUSG00000017446	C1qtnf1	transcript	1.69468	1.43437	0.240601	0.719766	1
ENSMUST00000017597	ENSMUSG00000017453	Pipox	transcript	0.474285	0.390348	0.280994	0.748185	1
ENSMUST00000017604	ENSMUSG00000006519	Cyba	transcript	4.9694	3.22472	0.623899	0.359301	1
ENSMUST00000017610	ENSMUSG00000017466	Timp2	transcript	82.9167	83.6894	-0.0133828	0.949204	1
ENSMUST00000017620	ENSMUSG00000025575	Cant1	transcript	4.92011	5.71154	-0.21519	0.658286	1
ENSMUST00000017622	ENSMUSG00000017478	Zc3h18	transcript	0.0478027	0.01378	1.79452	0.242618	1
ENSMUST00000017629	ENSMUSG00000017485	Top2b	transcript	28.1802	29.0303	-0.042875	0.887102	1
ENSMUST00000017637	ENSMUSG00000017493	Igfbp4	transcript	12.928	15.0224	-0.216623	0.604599	1
ENSMUST00000017692	ENSMUSG00000017548	Suz12	transcript	9.76983	10.5778	-0.114636	0.780423	1
ENSMUST00000017694	ENSMUSG00000017550	Atad5	transcript	0.79598	0.754562	0.0770928	0.907722	1
ENSMUST00000017732	ENSMUSG00000017588	Krt27	transcript	0	0	NA	1	1
ENSMUST00000017741	ENSMUSG00000020912	Krt12	transcript	2.30036	2.06852	0.15326	0.831942	1
ENSMUST00000017743	ENSMUSG00000035775	Krt20	transcript	0.059617	0.0682673	-0.195472	0.913323	1
ENSMUST00000017751	ENSMUSG00000017607	Tns4	transcript	0.096451	0.059552	0.695646	0.462337	1
ENSMUST00000017759	ENSMUSG00000017615	Tnfaip1	transcript	5.93447	8.32513	-0.488354	0.326279	1
ENSMUST00000017783	ENSMUSG00000017639	Rab11fip4	transcript	73.377	73.6347	-0.00505639	0.968448	1
ENSMUST00000017799	ENSMUSG00000017652	Cd40	transcript	0.116108	0.0536363	1.11418	0.300454	1
ENSMUST00000017808	ENSMUSG00000017664	Slc35c2	transcript	0	1.34786	#NAME?	0.000939442	0.120683
ENSMUST00000017821	ENSMUSG00000017677	Wsb1	transcript	12.3264	10.8614	0.182549	0.694016	1
ENSMUST00000017831	ENSMUSG00000017686	Rhot1	transcript	3.21021	3.74962	-0.224078	0.676845	1
ENSMUST00000017836	ENSMUSG00000017692	Rhbdl3	transcript	6.68019	7.23894	-0.11589	0.781365	1
ENSMUST00000017839	ENSMUSG00000020707	Rnf135	transcript	1.51658	1.27279	0.252831	0.72799	1
ENSMUST00000017841	ENSMUSG00000017697	Ada	transcript	0.470091	0.330471	0.508417	0.566253	1
ENSMUST00000017851	ENSMUSG00000017707	Serinc3	transcript	72.017	69.9855	0.0412807	0.924332	1
ENSMUST00000017864	ENSMUSG00000017720	Trp53tg5	transcript	0.0124673	0	Inf	0.371395	1
ENSMUST00000017867	ENSMUSG00000017723	Wfdc2	transcript	0.262259	0.457538	-0.802896	0.403136	1
ENSMUST00000017868	ENSMUSG00000017724	Etv4	transcript	1.33068	1.05453	0.335558	0.627852	1
ENSMUST00000017878	ENSMUSG00000017734	Dbndd2	transcript	20.6697	17.7282	0.221472	0.699057	1
ENSMUST00000017881	ENSMUSG00000017737	Mmp9	transcript	0.310278	0.289236	0.101314	0.924086	1
ENSMUST00000017891	ENSMUSG00000017747	Ghdc	transcript	2.11765	2.11171	0.00404994	0.997745	1
ENSMUST00000017900	ENSMUSG00000017756	Slc12a7	transcript	1.11407	1.09747	0.0216587	0.983395	1
ENSMUST00000017904	ENSMUSG00000017760	Ctsa	transcript	1.20534	1.19396	0.0136824	0.992385	1
ENSMUST00000017908	ENSMUSG00000017764	Zswim1	transcript	7.91036	7.20576	0.134592	0.781706	1
ENSMUST00000017911	ENSMUSG00000017767	Spata25	transcript	0.081308	0.0368347	1.14233	0.413918	1
ENSMUST00000017920	ENSMUSG00000017776	Crk	transcript	18.9086	8.73279	1.11453	0.0283995	1
ENSMUST00000017945	ENSMUSG00000017801	Mlx	transcript	2.85661	6.48775	-1.18341	0.032537	1
ENSMUST00000017946	ENSMUSG00000017802	Fam134c	transcript	11.6161	16.348	-0.492986	0.312109	1
ENSMUST00000017961	ENSMUSG00000017817	Jph2	transcript	0.284429	0.235119	0.274681	0.749728	1
ENSMUST00000017974	ENSMUSG00000017830	Dhx58	transcript	0.371668	0.328141	0.179699	0.838457	1
ENSMUST00000017975	ENSMUSG00000017831	Rab5a	transcript	45.2804	44.7191	0.0179948	0.979086	1
ENSMUST00000017976	ENSMUSG00000017832	Hspb9	transcript	0.0957207	0.110656	-0.209179	0.90829	1
ENSMUST00000017981	ENSMUSG00000017837	Nkiras2	transcript	3.48794	3.35808	0.0547394	0.93899	1
ENSMUST00000018002	ENSMUSG00000017858	Ift52	transcript	9.68188	9.15244	0.0811305	0.872597	1
ENSMUST00000018005	ENSMUSG00000017861	Mybl2	transcript	0.0829713	0.152961	-0.882479	0.334974	1
ENSMUST00000018012	ENSMUSG00000017868	Sgk2	transcript	0.418379	0.280902	0.574745	0.497337	1
ENSMUST00000018050	ENSMUSG00000039671	Zmynd8	transcript	0.291881	0.637924	-1.128	0.219724	1
ENSMUST00000018061	ENSMUSG00000021342	Prl	transcript	1.67039	0.603942	1.4677	0.26293	1
ENSMUST00000018066	ENSMUSG00000017922	Prl3c1	transcript	0	0	NA	1	1
ENSMUST00000018087	ENSMUSG00000017943	Gdap1l1	transcript	8.48752	11.7377	-0.467731	0.321122	1
ENSMUST00000018094	ENSMUSG00000017950	Hnf4a	transcript	0	0	NA	1	1
ENSMUST00000018113	ENSMUSG00000017969	Ptgis	transcript	0.974328	0.884857	0.138963	0.870865	1
ENSMUST00000018122	ENSMUSG00000017978	Cadps2	transcript	3.91562	1.76701	1.14793	0.607963	1
ENSMUST00000018143	ENSMUSG00000017999	Ddx27	transcript	6.10853	6.02918	0.0188647	0.98158	1
ENSMUST00000018156	ENSMUSG00000018012	Rac3	transcript	8.97419	8.03116	0.160173	0.781065	1
ENSMUST00000018184	ENSMUSG00000018040	Rrp7a	transcript	16.982	17.1178	-0.0114917	0.960319	1
ENSMUST00000018186	ENSMUSG00000018042	Cyb5r3	transcript	18.35	17.7638	0.0468397	0.925872	1
ENSMUST00000018212	ENSMUSG00000018068	Ints2	transcript	3.65477	3.61287	0.016636	0.984067	1
ENSMUST00000018246	ENSMUSG00000018102	Hist1h2bc	transcript	35.2258	35.9201	-0.0281602	0.933913	1
ENSMUST00000018274	ENSMUSG00000025162	Csnk1d	transcript	8.23226	5.31714	0.630637	0.394054	1
ENSMUST00000018287	ENSMUSG00000018143	Mafk	transcript	3.33148	3.10643	0.100904	0.86766	1
ENSMUST00000018295	ENSMUSG00000068206	Pick1	transcript	6.03354	6.36234	-0.0765522	0.869371	1
ENSMUST00000018304	ENSMUSG00000018160	Med1	transcript	0.0164837	1.24186	-6.23532	6.07503e-06	0.0031153
ENSMUST00000018311	ENSMUSG00000018167	Stard3	transcript	9.68775	10.2124	-0.0760857	0.853811	1
ENSMUST00000018313	ENSMUSG00000018169	Mfng	transcript	1.48676	1.09459	0.441772	0.542017	1
ENSMUST00000018315	ENSMUSG00000018171	Vmp1	transcript	32.2908	31.0495	0.0565539	0.899459	1
ENSMUST00000018333	ENSMUSG00000018189	Uchl5	transcript	5.62704	6.58664	-0.227167	0.741217	1
ENSMUST00000018337	ENSMUSG00000026361	Cdc73	transcript	8.98901	8.76604	0.0362374	0.94209	1
ENSMUST00000018353	ENSMUSG00000018209	Stk4	transcript	10.8307	10.9156	-0.0112714	0.961066	1
ENSMUST00000018355	ENSMUSG00000018211	Wfdc15b	transcript	0	0	NA	1	1
ENSMUST00000018361	ENSMUSG00000018217	Pmp22	transcript	9.05399	7.62611	0.247607	0.620102	1
ENSMUST00000018382	ENSMUSG00000018238	Gdf9	transcript	0.228455	0.308281	-0.432334	0.643503	1
ENSMUST00000018383	ENSMUSG00000018239	Zcchc10	transcript	4.24908	4.31686	-0.0228346	0.962704	1
ENSMUST00000018389	ENSMUSG00000021346	Prl8a8	transcript	0	0	NA	1	1
ENSMUST00000018392	ENSMUSG00000021345	Prl8a6	transcript	0	0	NA	1	1
ENSMUST00000018399	ENSMUSG00000035592	Krt33a	transcript	0.00805633	0	Inf	0.63169	1
ENSMUST00000018403	ENSMUSG00000018259	Prl8a2	transcript	0	0	NA	1	1
ENSMUST00000018407	ENSMUSG00000018263	Tbx5	transcript	0.00306033	0.00592767	-0.953776	0.725706	1
ENSMUST00000018429	ENSMUSG00000020828	Pld2	transcript	3.52108	3.39925	0.0508021	0.933621	1
ENSMUST00000018430	ENSMUSG00000018286	Psmb6	transcript	58.3364	57.4425	0.0222787	0.97317	1
ENSMUST00000018431	ENSMUSG00000018287	Spag7	transcript	15.3125	16.0392	-0.0668962	0.870744	1
ENSMUST00000018437	ENSMUSG00000018293	Pfn1	transcript	76.8585	81.6049	-0.0864519	0.811466	1
ENSMUST00000018449	ENSMUSG00000020850	Prpf8	transcript	45.6845	34.4579	0.406869	0.386886	1
ENSMUST00000018466	ENSMUSG00000018322	Tomm34	transcript	16.1438	20.1783	-0.321825	0.440607	1
ENSMUST00000018470	ENSMUSG00000018326	Ywhab	transcript	170.421	165.088	0.0458614	0.910878	1
ENSMUST00000018476	ENSMUSG00000022329	Stk3	transcript	7.12115	7.11785	0.000667699	0.988423	1
ENSMUST00000018478	ENSMUSG00000018334	Ksr1	transcript	12.8874	12.7933	0.0105798	0.99632	1
ENSMUST00000018482	ENSMUSG00000020400	Tnip1	transcript	0	0.50137	#NAME?	0.00172575	0.174171
ENSMUST00000018485	ENSMUSG00000018341	Il12rb2	transcript	0.008249	0.008009	0.0425971	1	1
ENSMUST00000018491	ENSMUSG00000018347	Zkscan6	transcript	0.192002	0.0831423	1.20747	0.3246	1
ENSMUST00000018506	ENSMUSG00000018362	Kpna2	transcript	9.27562	8.68683	0.0946139	0.851191	1
ENSMUST00000018516	ENSMUSG00000018372	Cep95	transcript	1.78506	1.72966	0.0454818	0.949327	1
ENSMUST00000018521	ENSMUSG00000018377	Vezf1	transcript	1.62609	3.0303	-0.898058	0.632082	1
ENSMUST00000018522	ENSMUSG00000018378	Cuedc1	transcript	1.08229	1.08747	-0.0068858	0.991702	1
ENSMUST00000018531	ENSMUSG00000018387	Shroom1	transcript	0.661392	0.548337	0.270444	0.836807	1
ENSMUST00000018544	ENSMUSG00000020486	2019-09-04	transcript	4.75334	4.91966	-0.0496143	0.920331	1
ENSMUST00000018547	ENSMUSG00000020530	Ggnbp2	transcript	8.08483	8.43486	-0.0611466	0.881019	1
ENSMUST00000018549	ENSMUSG00000018405	Mrm1	transcript	3.82971	3.39973	0.171813	0.763644	1
ENSMUST00000018556	ENSMUSG00000018412	Kansl1	transcript	10.4038	10.6137	-0.0288167	0.927751	1
ENSMUST00000018561	ENSMUSG00000018417	Myo1b	transcript	8.79733	8.67515	0.0201774	0.978883	1
ENSMUST00000018568	ENSMUSG00000020537	Drg2	transcript	18.1734	17.6896	0.0389265	0.941759	1
ENSMUST00000018569	ENSMUSG00000018425	Dhx40	transcript	7.50358	7.12774	0.0741345	0.880047	1
ENSMUST00000018571	ENSMUSG00000018427	Ypel2	transcript	15.7465	18.317	-0.218153	0.554627	1
ENSMUST00000018572	ENSMUSG00000018428	Akap1	transcript	10.3885	10.7242	-0.0458837	0.898103	1
ENSMUST00000018577	ENSMUSG00000018433	Nol11	transcript	7.08164	7.19417	-0.0227448	0.944967	1
ENSMUST00000018593	ENSMUSG00000018449	Rpain	transcript	3.54961	3.73842	-0.074767	0.905234	1
ENSMUST00000018610	ENSMUSG00000020826	Nos2	transcript	0.093947	0.0406227	1.20956	0.226645	1
ENSMUST00000018614	ENSMUSG00000018470	Kcnab3	transcript	16.7627	15.5884	0.104786	0.818289	1
ENSMUST00000018623	ENSMUSG00000018479	1700125H20Rik	transcript	0.0334123	0.0537227	-0.68515	0.804174	1
ENSMUST00000018625	ENSMUSG00000018481	Appbp2	transcript	24.2924	23.9829	0.0184985	0.978012	1
ENSMUST00000018630	ENSMUSG00000018486	Wnt9b	transcript	0.476965	0.549459	-0.204128	0.766803	1
ENSMUST00000018632	ENSMUSG00000057003	Myh4	transcript	0.0740117	0.0889933	-0.265945	0.784707	1
ENSMUST00000018637	ENSMUSG00000056328	Myh1	transcript	0	0	NA	1	1
ENSMUST00000018641	ENSMUSG00000033196	Myh2	transcript	0	0	NA	1	1
ENSMUST00000018644	ENSMUSG00000018500	Adora2b	transcript	1.94251	1.77303	0.131711	0.854736	1
ENSMUST00000018645	ENSMUSG00000018501	Ncor1	transcript	0.627003	1.18728	-0.921119	0.245215	1
ENSMUST00000018651	ENSMUSG00000018507	Trpv2	transcript	3.8242	3.2513	0.23414	0.678723	1
ENSMUST00000018653	ENSMUSG00000018509	Cenpv	transcript	9.21858	9.20894	0.00150881	0.991586	1
ENSMUST00000018681	ENSMUSG00000018537	Pcgf2	transcript	0.309053	0.149149	1.0511	0.371426	1
ENSMUST00000018685	ENSMUSG00000018541	Cwc25	transcript	4.6675	4.97867	-0.0931109	0.834233	1
ENSMUST00000018691	ENSMUSG00000018547	Pip4k2b	transcript	35.283	36.4294	-0.0461303	0.879728	1
ENSMUST00000018698	ENSMUSG00000018554	Ybx2	transcript	0.237802	0.120261	0.983586	0.395142	1
ENSMUST00000018699	ENSMUSG00000020884	Asgr1	transcript	0.206023	0	Inf	0.0218927	0.87067
ENSMUST00000018700	ENSMUSG00000020886	Dlg4	transcript	19.9818	20.8169	-0.0590682	0.873317	1
ENSMUST00000018710	ENSMUSG00000018566	Slc2a4	transcript	0.510806	0.520127	-0.0260894	0.964396	1
ENSMUST00000018711	ENSMUSG00000018567	Gabarap	transcript	52.7167	52.6117	0.00287479	0.989098	1
ENSMUST00000018713	ENSMUSG00000018569	Cldn7	transcript	0.060174	0.0174407	1.78669	0.343229	1
ENSMUST00000018714	ENSMUSG00000018570	2810408A11Rik	transcript	0	0	NA	1	1
ENSMUST00000018716	ENSMUSG00000018572	Phf23	transcript	2.6051	3.63549	-0.480813	0.42801	1
ENSMUST00000018718	ENSMUSG00000018574	Acadvl	transcript	1.00963	1.79293	-0.828498	0.679325	1
ENSMUST00000018719	ENSMUSG00000033987	Dnah17	transcript	0.0137783	0.008925	0.626477	0.806675	1
ENSMUST00000018727	ENSMUSG00000018583	G3bp1	transcript	12.2875	12.7502	-0.0533205	0.871179	1
ENSMUST00000018737	ENSMUSG00000018593	Sparc	transcript	28.736	26.1593	0.135538	0.763295	1
ENSMUST00000018739	ENSMUSG00000018595	Glra4	transcript	0.081811	0.119117	-0.542013	0.629832	1
ENSMUST00000018743	ENSMUSG00000018599	Mief2	transcript	5.31791	5.16715	0.0414895	0.945886	1
ENSMUST00000018744	ENSMUSG00000020534	Shmt1	transcript	1.09574	0.767657	0.51337	0.489892	1
ENSMUST00000018748	ENSMUSG00000018604	Tbx3	transcript	0.0909977	0.0650087	0.485197	0.787129	1
ENSMUST00000018755	ENSMUSG00000020388	Pdlim4	transcript	5.90098	5.5102	0.0988495	0.878203	1
ENSMUST00000018765	ENSMUSG00000005800	Mmp8	transcript	0.014776	0.0538303	-1.86516	0.224807	1
ENSMUST00000018767	ENSMUSG00000018623	Mmp7	transcript	0	0	NA	1	1
ENSMUST00000018792	ENSMUSG00000018648	Dusp14	transcript	0.0467287	0.0440413	0.0854497	1	1
ENSMUST00000018795	ENSMUSG00000018651	Tada2a	transcript	7.91382	7.53804	0.0701847	0.896947	1
ENSMUST00000018798	ENSMUSG00000018654	Ikzf1	transcript	0.239091	0.11521	1.05329	0.511917	1
ENSMUST00000018800	ENSMUSG00000061086	Myl4	transcript	0	0.411888	#NAME?	0.012418	0.610021
ENSMUST00000018803	ENSMUSG00000018659	Pnpo	transcript	18.4872	16.4956	0.164449	0.715184	1
ENSMUST00000018805	ENSMUSG00000018661	Cog1	transcript	9.03811	8.69168	0.0563864	0.9108	1
ENSMUST00000018810	ENSMUSG00000018666	Cbx1	transcript	1.47201	1.75387	-0.252753	0.699111	1
ENSMUST00000018816	ENSMUSG00000018672	Copz2	transcript	2.00478	1.88511	0.0887953	0.91176	1
ENSMUST00000018821	ENSMUSG00000018677	Slc25a39	transcript	12.5745	11.7363	0.0995291	0.844134	1
ENSMUST00000018841	ENSMUSG00000018697	Aatf	transcript	5.70466	5.79176	-0.0218601	0.955037	1
ENSMUST00000018842	ENSMUSG00000018698	Lhx1	transcript	0.295592	0.330009	-0.158898	0.845379	1
ENSMUST00000018851	ENSMUSG00000018707	Dync1h1	transcript	106.028	100.348	0.0794322	0.832592	1
ENSMUST00000018871	ENSMUSG00000018727	Cpsf4l	transcript	0	0.005197	#NAME?	1	1
ENSMUST00000018875	ENSMUSG00000035152	Ap2b1	transcript	78.1518	79.8902	-0.0317385	0.90489	1
ENSMUST00000018877	ENSMUSG00000018733	Pex12	transcript	0.198173	0.0309827	2.67723	0.0260866	0.973405
ENSMUST00000018880	ENSMUSG00000018736	Ndel1	transcript	27.2047	29.5677	-0.120166	0.746739	1
ENSMUST00000018884	ENSMUSG00000018740	Slc25a35	transcript	0.738605	0.502805	0.554803	0.638435	1
ENSMUST00000018887	ENSMUSG00000020900	Myh10	transcript	47.4908	49.582	-0.0621676	0.83507	1
ENSMUST00000018896	ENSMUSG00000089669	Tnfsf13	transcript	0.190352	0.322793	-0.76194	0.404197	1
ENSMUST00000018905	ENSMUSG00000018761	Mpdu1	transcript	15.4183	14.3636	0.102226	0.836458	1
ENSMUST00000018909	ENSMUSG00000018765	Fxr2	transcript	35.6489	35.7962	-0.00594959	0.969424	1
ENSMUST00000018914	ENSMUSG00000018770	Atp5g3	transcript	47.1014	44.4011	0.0851722	0.857552	1
ENSMUST00000018918	ENSMUSG00000018774	Cd68	transcript	5.57547	2.75182	1.0187	0.103102	1
ENSMUST00000018963	ENSMUSG00000018819	Lsp1	transcript	0.335347	0.547308	-0.706699	0.503747	1
ENSMUST00000018965	ENSMUSG00000018821	Avpi1	transcript	11.8892	11.9881	-0.0119556	0.968444	1
ENSMUST00000018966	ENSMUSG00000018822	Sfrp5	transcript	1.96916	1.59182	0.306904	0.660614	1
ENSMUST00000018971	ENSMUSG00000053046	Brsk2	transcript	6.39553	8.08065	-0.337406	0.436163	1
ENSMUST00000018985	ENSMUSG00000018841	Rad51d	transcript	5.33314	4.99439	0.0946762	0.855016	1
ENSMUST00000018988	ENSMUSG00000018844	Fndc8	transcript	0.00625967	0.009775	-0.643011	0.80356	1
ENSMUST00000018989	ENSMUSG00000018845	Unc45b	transcript	0	0	NA	1	1
ENSMUST00000018990	ENSMUSG00000018846	Pank3	transcript	16.6246	16.2348	0.0342266	0.944684	1
ENSMUST00000018992	ENSMUSG00000018848	Rars	transcript	13.4705	13.4565	0.00150651	0.989509	1
ENSMUST00000018993	ENSMUSG00000018849	Wwc1	transcript	21.6374	23.3515	-0.10999	0.751594	1
ENSMUST00000019006	ENSMUSG00000018862	Otop3	transcript	0.0285643	0.0194597	0.553728	0.796613	1
ENSMUST00000019012	ENSMUSG00000018868	Pnpla5	transcript	0.009846	0	Inf	0.252931	1
ENSMUST00000019026	ENSMUSG00000018882	Mrpl45	transcript	8.88439	8.9248	-0.00654695	0.973872	1
ENSMUST00000019037	ENSMUSG00000018893	Mb	transcript	0	0.00238267	#NAME?	1	1
ENSMUST00000019038	ENSMUSG00000059248	2019-09-09	transcript	7.29167	3.85346	0.920096	0.077659	1
ENSMUST00000019043	ENSMUSG00000018899	Irf1	transcript	0.52088	0.594431	-0.190558	0.814226	1
ENSMUST00000019044	ENSMUSG00000018900	Slc22a5	transcript	2.96916	2.77748	0.096278	0.874533	1
ENSMUST00000019050	ENSMUSG00000018906	P4ha2	transcript	2.06677	2.09572	-0.0200677	0.965439	1
ENSMUST00000019051	ENSMUSG00000018907	Alox12e	transcript	0.085279	0.0607903	0.488349	0.733962	1
ENSMUST00000019058	ENSMUSG00000018914	Il3	transcript	0	0	NA	1	1
ENSMUST00000019060	ENSMUSG00000018916	Csf2	transcript	0	0	NA	1	1
ENSMUST00000019063	ENSMUSG00000018919	Tm4sf5	transcript	0.194751	0.0803847	1.27664	0.241399	1
ENSMUST00000019064	ENSMUSG00000018920	Cxcl16	transcript	0.549947	0.305966	0.84592	0.287243	1
ENSMUST00000019065	ENSMUSG00000018921	Pelp1	transcript	10.5467	10.2028	0.047823	0.925891	1
ENSMUST00000019067	ENSMUSG00000018923	Med11	transcript	3.88923	4.11267	-0.0805933	0.891315	1
ENSMUST00000019068	ENSMUSG00000018924	Alox15	transcript	0.0164317	0	Inf	0.123119	1
ENSMUST00000019069	ENSMUSG00000018925	Heatr9	transcript	0	0.00365067	#NAME?	0.631977	1
ENSMUST00000019071	ENSMUSG00000018927	Ccl6	transcript	1.77492	0.638177	1.47573	0.0683901	1
ENSMUST00000019074	ENSMUSG00000018930	Ccl4	transcript	0.263702	0	Inf	0.00216673	0.197916
ENSMUST00000019075	ENSMUSG00000018931	Natd1	transcript	3.29127	3.25083	0.0178329	0.985628	1
ENSMUST00000019076	ENSMUSG00000018932	Map2k3	transcript	3.79472	3.89293	-0.0368646	0.935458	1
ENSMUST00000019101	ENSMUSG00000000037	Scml2	transcript	0.006708	0.008189	-0.287805	0.819613	1
ENSMUST00000019109	ENSMUSG00000018965	Ywhah	transcript	358.053	362.446	-0.0175956	0.939603	1
ENSMUST00000019117	ENSMUSG00000018973	Hoxb1	transcript	0	0	NA	1	1
ENSMUST00000019118	ENSMUSG00000018974	Sart3	transcript	10.4836	10.9683	-0.0652139	0.862785	1
ENSMUST00000019128	ENSMUSG00000000568	Hnrnpd	transcript	0.802987	0.844663	-0.0730004	0.923335	1
ENSMUST00000019130	ENSMUSG00000018986	Slfn3	transcript	0.12913	0.180943	-0.486711	0.594254	1
ENSMUST00000019133	ENSMUSG00000057897	Camk2b	transcript	2.25037	3.27747	-0.54242	0.612271	1
ENSMUST00000019135	ENSMUSG00000020740	Gga3	transcript	14.5439	15.3519	-0.0780042	0.831384	1
ENSMUST00000019143	ENSMUSG00000018999	Slc35b4	transcript	12.4769	12.4775	-7.74312e-05	0.98096	1
ENSMUST00000019169	ENSMUSG00000002395	Use1	transcript	9.00892	10.9592	-0.282717	0.607091	1
ENSMUST00000019183	ENSMUSG00000019039	Dalrd3	transcript	16.7011	16.0957	0.0532734	0.917818	1
ENSMUST00000019192	ENSMUSG00000024041	Cryaa	transcript	0.0850113	0.0339633	1.32368	0.539106	1
ENSMUST00000019198	ENSMUSG00000019054	Fis1	transcript	36.2129	36.9339	-0.0284388	0.932388	1
ENSMUST00000019199	ENSMUSG00000019055	Plod1	transcript	5.50437	6.00642	-0.125928	0.771644	1
ENSMUST00000019220	ENSMUSG00000030374	Strn4	transcript	29.2534	27.6755	0.0799948	0.849752	1
ENSMUST00000019224	ENSMUSG00000019080	Mfsd3	transcript	1.76623	1.50195	0.233833	0.735615	1
ENSMUST00000019226	ENSMUSG00000019082	Slc25a22	transcript	8.03868	8.31779	-0.0492423	0.900695	1
ENSMUST00000019229	ENSMUSG00000006392	Med8	transcript	5.56798	5.42867	0.0365553	0.977178	1
ENSMUST00000019231	ENSMUSG00000019087	Atp6ap1	transcript	90.9122	81.9458	0.149803	0.694275	1
ENSMUST00000019232	ENSMUSG00000019088	Dnase1l1	transcript	0.782141	0.486993	0.683527	0.401	1
ENSMUST00000019246	ENSMUSG00000019102	Aldh3a1	transcript	0.388556	0.332217	0.225995	0.806306	1
ENSMUST00000019248	ENSMUSG00000030577	Cd22	transcript	0.092904	0.0324587	1.51714	0.121765	1
ENSMUST00000019257	ENSMUSG00000000731	Aire	transcript	0	0	NA	1	1
ENSMUST00000019266	ENSMUSG00000019122	Ccl9	transcript	0.239368	0.286552	-0.259567	0.773524	1
ENSMUST00000019268	ENSMUSG00000019124	Scrn1	transcript	57.194	55.7953	0.0357201	0.937289	1
ENSMUST00000019276	ENSMUSG00000019132	BC005537	transcript	58.9968	60.4961	-0.0362066	0.899318	1
ENSMUST00000019281	ENSMUSG00000027381	Bcl2l11	transcript	0.002507	0.00941933	-1.90966	0.60439	1
ENSMUST00000019283	ENSMUSG00000019139	Isyna1	transcript	14.6503	14.0612	0.0592078	0.908222	1
ENSMUST00000019287	ENSMUSG00000019143	Hars2	transcript	0.48207	0.873968	-0.858337	0.671463	1
ENSMUST00000019290	ENSMUSG00000019146	Cacng2	transcript	16.3553	17.2343	-0.0755264	0.824479	1
ENSMUST00000019291	ENSMUSG00000030373	Psg28	transcript	0	0	NA	1	1
ENSMUST00000019302	ENSMUSG00000019158	Tmem160	transcript	22.1698	23.0975	-0.059141	0.883228	1
ENSMUST00000019317	ENSMUSG00000019173	Rab5c	transcript	5.98953	6.13695	-0.0350801	0.936822	1
ENSMUST00000019323	ENSMUSG00000019179	Mdh2	transcript	122.498	121.321	0.0139251	0.986899	1
ENSMUST00000019333	ENSMUSG00000019189	Rnf145	transcript	24.8967	24.7002	0.0114312	0.994337	1
ENSMUST00000019354	ENSMUSG00000019210	Atp6v1e1	transcript	183.138	179.789	0.0266307	0.957862	1
ENSMUST00000019362	ENSMUSG00000020888	Dvl2	transcript	2.49111	1.58556	0.651797	0.612254	1
ENSMUST00000019374	ENSMUSG00000019230	Lhx9	transcript	0.924402	0.41683	1.14906	0.0981567	1
ENSMUST00000019378	ENSMUSG00000021245	Mlh3	transcript	6.1335	6.53402	-0.0912614	0.816406	1
ENSMUST00000019379	ENSMUSG00000019235	Rps6kl1	transcript	10.1372	9.9928	0.0207029	0.978338	1
ENSMUST00000019382	ENSMUSG00000031708	Tecr	transcript	30.0079	54.161	-0.851915	0.0402504	1
ENSMUST00000019386	ENSMUSG00000005251	Ripk4	transcript	0.404958	0.0296677	3.77081	0.0019828	0.187908
ENSMUST00000019405	ENSMUSG00000019261	Map1s	transcript	19.8629	18.8185	0.0779201	0.861311	1
ENSMUST00000019422	ENSMUSG00000019278	Dpep1	transcript	0.0521347	0.0603427	-0.210935	0.915042	1
ENSMUST00000019426	ENSMUSG00000001804	Dsg4	transcript	0	0	NA	1	1
ENSMUST00000019439	ENSMUSG00000019295	Tmem129	transcript	7.3384	7.35911	-0.00406713	0.980521	1
ENSMUST00000019441	ENSMUSG00000019297	Nop9	transcript	3.31644	3.17148	0.0644777	0.913548	1
ENSMUST00000019443	ENSMUSG00000047098	Rnf31	transcript	6.17356	5.70875	0.112927	0.819614	1
ENSMUST00000019445	ENSMUSG00000019301	Hsd17b1	transcript	0.080424	0.0514877	0.643399	0.72993	1
ENSMUST00000019447	ENSMUSG00000019303	Psmc3ip	transcript	0.55035	0.632339	-0.200347	0.805791	1
ENSMUST00000019456	ENSMUSG00000019312	Grb7	transcript	0.843236	0.933021	-0.145973	0.838899	1
ENSMUST00000019464	ENSMUSG00000019320	Noxo1	transcript	0.553845	0.337788	0.713362	0.388505	1
ENSMUST00000019469	ENSMUSG00000078650	G6pc	transcript	0.015401	0.029567	-0.940964	0.74262	1
ENSMUST00000019470	ENSMUSG00000078652	Psme3	transcript	34.6175	34.7401	-0.00509904	0.971959	1
ENSMUST00000019482	ENSMUSG00000019338	Zfp687	transcript	7.30754	6.52067	0.164364	0.718844	1
ENSMUST00000019503	ENSMUSG00000019359	Gdpd2	transcript	1.18682	0.991144	0.259931	0.713944	1
ENSMUST00000019506	ENSMUSG00000019362	D8Ertd738e	transcript	27.4603	26.6357	0.0439884	0.941955	1
ENSMUST00000019512	ENSMUSG00000019368	Sec14l4	transcript	0.13306	0.14965	-0.169512	0.881498	1
ENSMUST00000019514	ENSMUSG00000019370	Calm3	transcript	535.52	529.695	0.0157766	0.981222	1
ENSMUST00000019516	ENSMUSG00000075590	Nrbp2	transcript	18.9996	18.6705	0.0252071	0.968045	1
ENSMUST00000019517	ENSMUSG00000019373	Cops3	transcript	24.8083	24.5945	0.0124892	0.991722	1
ENSMUST00000019572	ENSMUSG00000059839	Zfp874b	transcript	4.49451	5.32235	-0.2439	0.583689	1
ENSMUST00000019576	ENSMUSG00000005481	Ddx39	transcript	3.27701	3.31276	-0.0156516	0.976841	1
ENSMUST00000019577	ENSMUSG00000019433	Gipc1	transcript	26.0686	25.5387	0.0296289	0.95894	1
ENSMUST00000019605	ENSMUSG00000019461	Plscr3	transcript	1.45339	1.26502	0.200261	0.798205	1
ENSMUST00000019608	ENSMUSG00000019464	Ptger1	transcript	0.406123	0.363007	0.161919	0.839119	1
ENSMUST00000019611	ENSMUSG00000019467	Arhgef25	transcript	32.9429	34.2659	-0.0568092	0.866735	1
ENSMUST00000019614	ENSMUSG00000019470	Xab2	transcript	10.9794	10.3611	0.083615	0.861723	1
ENSMUST00000019615	ENSMUSG00000019471	Cdc37	transcript	30.6376	31.3509	-0.0332067	0.915403	1
ENSMUST00000019616	ENSMUSG00000032174	Icam5	transcript	56.4331	54.9059	0.0395826	0.929896	1
ENSMUST00000019625	ENSMUSG00000055775	Myh8	transcript	0.210784	0.12455	0.75904	0.35474	1
ENSMUST00000019631	ENSMUSG00000019487	Trip10	transcript	1.78554	2.45987	-0.462219	0.447843	1
ENSMUST00000019633	ENSMUSG00000019489	Cd70	transcript	0.10399	0.07259	0.518602	0.705298	1
ENSMUST00000019638	ENSMUSG00000019494	Cops6	transcript	35.8715	33.1635	0.113242	0.792388	1
ENSMUST00000019649	ENSMUSG00000019505	Ubb	transcript	368.123	384.098	-0.0612838	0.836254	1
ENSMUST00000019660	ENSMUSG00000029729	Zkscan1	transcript	5.44201	7.02325	-0.367999	0.411598	1
ENSMUST00000019662	ENSMUSG00000019518	Ap4m1	transcript	4.97799	4.66684	0.0931172	0.879787	1
ENSMUST00000019677	ENSMUSG00000028708	Mknk1	transcript	6.37248	5.90635	0.109586	0.829884	1
ENSMUST00000019679	ENSMUSG00000002343	Armc6	transcript	8.66544	8.37245	0.0496235	0.927674	1
ENSMUST00000019683	ENSMUSG00000019539	Rcn3	transcript	0.663004	0.844739	-0.349488	0.696739	1
ENSMUST00000019684	ENSMUSG00000002504	Slc9a3r2	transcript	1.26827	1.24406	0.027804	0.986307	1
ENSMUST00000019697	ENSMUSG00000078762	Haus5	transcript	1.61309	1.36669	0.239147	0.736354	1
ENSMUST00000019701	ENSMUSG00000031383	Dusp9	transcript	0.258255	0.195709	0.400084	0.637225	1
ENSMUST00000019708	ENSMUSG00000019564	Arid3a	transcript	0.963714	1.53931	-0.675611	0.2474	1
ENSMUST00000019721	ENSMUSG00000019577	Pdk4	transcript	5.69071	4.96333	0.197301	0.689081	1
ENSMUST00000019722	ENSMUSG00000019578	Ubxn6	transcript	20.6305	19.5746	0.0757912	0.867093	1
ENSMUST00000019723	ENSMUSG00000019579	D17Wsu104e	transcript	12.5051	11.6381	0.103664	0.83351	1
ENSMUST00000019726	ENSMUSG00000024197	Plin3	transcript	8.85994	7.66736	0.208568	0.671728	1
ENSMUST00000019734	ENSMUSG00000019590	Cyb561	transcript	17.883	18.7672	-0.0696252	0.854379	1
ENSMUST00000019749	ENSMUSG00000027102	Hoxd8	transcript	0	0	NA	1	1
ENSMUST00000019791	ENSMUSG00000019647	Sema6a	transcript	2.4733	2.30827	0.0996262	0.848575	1
ENSMUST00000019803	ENSMUSG00000019659	Ccdc12	transcript	12.6665	12.8131	-0.0165964	0.96363	1
ENSMUST00000019808	ENSMUSG00000011305	Plin5	transcript	0.190978	0.0699763	1.44847	0.391457	1
ENSMUST00000019833	ENSMUSG00000019689	1110001J03Rik	transcript	17.8691	19.1986	-0.103537	0.836906	1
ENSMUST00000019843	ENSMUSG00000019699	Akt3	transcript	0.433469	0.391113	0.148344	0.860635	1
ENSMUST00000019854	ENSMUSG00000019710	Mrpl24	transcript	3.31103	2.12144	0.642238	0.366442	1
ENSMUST00000019859	ENSMUSG00000019715	Gle1	transcript	10.9532	11.0142	-0.00801074	0.967936	1
ENSMUST00000019861	ENSMUSG00000042197	Zfp451	transcript	4.72591	4.06206	0.218381	0.65122	1
ENSMUST00000019862	ENSMUSG00000019718	L3hypdh	transcript	0.891152	0.816913	0.12549	0.880522	1
ENSMUST00000019876	ENSMUSG00000019732	Calr3	transcript	0.459834	0.38659	0.25031	0.766903	1
ENSMUST00000019878	ENSMUSG00000078813	Leng1	transcript	2.05029	1.94968	0.0725899	0.923166	1
ENSMUST00000019882	ENSMUSG00000019738	Polr2i	transcript	3.92481	3.33957	0.232959	0.743832	1
ENSMUST00000019896	ENSMUSG00000019762	Iyd	transcript	0.528239	0.548608	-0.054584	0.94732	1
ENSMUST00000019901	ENSMUSG00000019767	Ccdc170	transcript	0	0	NA	1	1
ENSMUST00000019906	ENSMUSG00000019772	Vip	transcript	16.2009	13.0618	0.310715	0.505802	1
ENSMUST00000019907	ENSMUSG00000019773	Fbxo5	transcript	0.520773	0.434786	0.260349	0.773435	1
ENSMUST00000019908	ENSMUSG00000019774	Mtrf1l	transcript	2.076	2.2777	-0.133775	0.812576	1
ENSMUST00000019909	ENSMUSG00000019775	Rgs17	transcript	0.128435	0.415859	-1.69506	0.152435	1
ENSMUST00000019911	ENSMUSG00000019777	Hdac2	transcript	28.5086	29.3054	-0.0397726	0.905719	1
ENSMUST00000019913	ENSMUSG00000019779	Frk	transcript	0.040734	0.0470933	-0.209289	0.924538	1
ENSMUST00000019917	ENSMUSG00000019782	Rwdd1	transcript	28.1303	27.5044	0.0324607	0.955911	1
ENSMUST00000019920	ENSMUSG00000019785	Clvs2	transcript	12.5412	12.6197	-0.00900936	0.967888	1
ENSMUST00000019924	ENSMUSG00000019789	Hey2	transcript	1.66215	1.96546	-0.241817	0.686336	1
ENSMUST00000019925	ENSMUSG00000019791	Hint3	transcript	0.244683	0.267694	-0.129669	1	1
ENSMUST00000019927	ENSMUSG00000019792	Trmt11	transcript	2.7587	2.55063	0.113139	0.861913	1
ENSMUST00000019929	ENSMUSG00000019794	Katna1	transcript	2.48973	2.72022	-0.127736	0.896055	1
ENSMUST00000019931	ENSMUSG00000019796	Lrp11	transcript	12.4181	11.7076	0.084993	0.860586	1
ENSMUST00000019932	ENSMUSG00000019797	1700021F05Rik	transcript	7.49064	8.32178	-0.151803	0.779724	1
ENSMUST00000019937	ENSMUSG00000019802	Sec63	transcript	14.6542	15.6044	-0.0906412	0.792418	1
ENSMUST00000019938	ENSMUSG00000019803	Nr2e1	transcript	3.31318	3.51925	-0.0870505	0.852726	1
ENSMUST00000019939	ENSMUSG00000019804	Snx3	transcript	49.6285	52.1052	-0.0702577	0.843029	1
ENSMUST00000019942	ENSMUSG00000019806	Aig1	transcript	1.47589	1.44723	0.0282932	0.980897	1
ENSMUST00000019944	ENSMUSG00000019808	Adat2	transcript	3.34272	3.82564	-0.194677	0.74271	1
ENSMUST00000019945	ENSMUSG00000019809	Pex3	transcript	1.10658	3.6566	-1.7244	0.0516519	1
ENSMUST00000019950	ENSMUSG00000019814	Ltv1	transcript	4.87454	5.27356	-0.11351	0.823028	1
ENSMUST00000019951	ENSMUSG00000019813	Cep57l1	transcript	0	0.020406	#NAME?	0.21544	1
ENSMUST00000019954	ENSMUSG00000019815	Zc2hc1b	transcript	0	0.00262867	#NAME?	1	1
ENSMUST00000019955	ENSMUSG00000075225	Ccdc162	transcript	0.0544533	0	Inf	0.0771211	1
ENSMUST00000019962	ENSMUSG00000019818	Cd164	transcript	21.5558	21.1105	0.0301107	0.956662	1
ENSMUST00000019965	ENSMUSG00000019822	Smpd2	transcript	4.51268	4.38607	0.0410568	0.954869	1
ENSMUST00000019967	ENSMUSG00000019823	Mical1	transcript	2.22061	1.86685	0.250354	0.676593	1
ENSMUST00000019974	ENSMUSG00000019832	Rab32	transcript	0.828963	0.598317	0.470398	0.535095	1
ENSMUST00000019975	ENSMUSG00000019831	Wasf1	transcript	53.074	51.4044	0.0461127	0.916238	1
ENSMUST00000019977	ENSMUSG00000063428	Ddo	transcript	1.60965	1.63112	-0.0191215	0.966837	1
ENSMUST00000019978	ENSMUSG00000019834	Slc22a16	transcript	0	0	NA	1	1
ENSMUST00000019982	ENSMUSG00000019837	Gtf3c6	transcript	6.54462	5.95224	0.136876	0.829328	1
ENSMUST00000019986	ENSMUSG00000019841	Rev3l	transcript	7.56994	7.74507	-0.0329972	0.913205	1
ENSMUST00000019987	ENSMUSG00000019842	Traf3ip2	transcript	0.356443	0.346684	0.0400501	0.963759	1
ENSMUST00000019991	ENSMUSG00000019845	Tube1	transcript	0.682516	0.637343	0.0987914	0.902731	1
ENSMUST00000019992	ENSMUSG00000019846	Lama4	transcript	1.67086	1.72145	-0.0430323	0.923036	1
ENSMUST00000019994	ENSMUSG00000019848	Popdc3	transcript	0.52239	0.480489	0.120625	0.897986	1
ENSMUST00000019997	ENSMUSG00000019850	Tnfaip3	transcript	1.13201	1.37245	-0.277867	0.636671	1
ENSMUST00000019998	ENSMUSG00000019851	Perp	transcript	2.59945	2.80175	-0.108123	0.850663	1
ENSMUST00000019999	ENSMUSG00000019852	D10Bwg1379e	transcript	28.5003	29.1526	-0.0326493	0.905207	1
ENSMUST00000020000	ENSMUSG00000019853	Hebp2	transcript	1.07757	1.34464	-0.31943	0.64189	1
ENSMUST00000020002	ENSMUSG00000078453	Abracl	transcript	6.01574	6.38259	-0.0854008	0.88153	1
ENSMUST00000020003	ENSMUSG00000019856	Fam184a	transcript	4.36352	3.67946	0.245995	0.659952	1
ENSMUST00000020004	ENSMUSG00000019857	Asf1a	transcript	6.4415	6.82974	-0.084434	0.847703	1
ENSMUST00000020008	ENSMUSG00000019861	Gopc	transcript	8.68495	13.5151	-0.63798	0.592105	1
ENSMUST00000020012	ENSMUSG00000019863	Qrsl1	transcript	4.49297	4.49674	-0.00121154	0.987811	1
ENSMUST00000020015	ENSMUSG00000019865	Nmbr	transcript	1.28779	1.2753	0.0140637	0.991193	1
ENSMUST00000020016	ENSMUSG00000019867	Gje1	transcript	0.016298	0.00755167	1.10983	0.844257	1
ENSMUST00000020017	ENSMUSG00000019866	Aim1	transcript	0.348945	0.28839	0.27498	0.707999	1
ENSMUST00000020022	ENSMUSG00000019872	Smpdl3a	transcript	8.31131	8.24454	0.0116361	0.995499	1
ENSMUST00000020023	ENSMUSG00000019873	Reep3	transcript	7.78341	7.90131	-0.0216909	0.942771	1
ENSMUST00000020024	ENSMUSG00000019874	Fabp7	transcript	17.0113	16.4347	0.0497548	0.930339	1
ENSMUST00000020027	ENSMUSG00000019877	Serinc1	transcript	328.554	311.051	0.0789814	0.833222	1
ENSMUST00000020034	ENSMUSG00000019883	Echdc1	transcript	4.02243	4.34258	-0.110487	0.820077	1
ENSMUST00000020039	ENSMUSG00000019888	Mgat4c	transcript	0.00844833	0.582038	-6.1063	0.00156801	0.163476
ENSMUST00000020040	ENSMUSG00000019890	Nts	transcript	4.91773	4.44127	0.14702	0.821924	1
ENSMUST00000020043	ENSMUSG00000019892	Lrriq1	transcript	0.0888833	0.0459607	0.951513	0.60789	1
ENSMUST00000020045	ENSMUSG00000019893	Ros1	transcript	0	0	NA	1	1
ENSMUST00000020049	ENSMUSG00000019897	Ccdc59	transcript	7.90285	8.56489	-0.116062	0.794971	1
ENSMUST00000020057	ENSMUSG00000019906	Lin7a	transcript	12.6787	14.4192	-0.185584	0.613163	1
ENSMUST00000020062	ENSMUSG00000019905	Gprc6a	transcript	0.00474733	0	Inf	0.631662	1
ENSMUST00000020064	ENSMUSG00000019909	Fam162b	transcript	0	0	NA	1	1
ENSMUST00000020071	ENSMUSG00000019913	Sim1	transcript	0.134434	0.186348	-0.471098	0.565087	1
ENSMUST00000020077	ENSMUSG00000019920	Lims1	transcript	0.881237	0.6944	0.343763	0.670605	1
ENSMUST00000020078	ENSMUSG00000019920	Lims1	transcript	6.28221	6.21427	0.0156861	0.991447	1
ENSMUST00000020081	ENSMUSG00000019923	Zwint	transcript	357.067	342.026	0.0620916	0.873587	1
ENSMUST00000020085	ENSMUSG00000019927	Ube2d1	transcript	19.6329	20.7632	-0.0807561	0.837164	1
ENSMUST00000020094	ENSMUSG00000019936	Epyc	transcript	0	0	NA	1	1
ENSMUST00000020099	ENSMUSG00000019942	Cdk1	transcript	0.130047	0.0671633	0.953284	0.417484	1
ENSMUST00000020101	ENSMUSG00000019944	Rhobtb1	transcript	0.188372	0.323908	-0.781998	0.588374	1
ENSMUST00000020102	ENSMUSG00000019935	Slc17a8	transcript	1.22002	1.14931	0.086136	0.902923	1
ENSMUST00000020103	ENSMUSG00000019945	1700040L02Rik	transcript	0.727919	0.429793	0.760135	0.405087	1
ENSMUST00000020106	ENSMUSG00000019947	Arid5b	transcript	11.1396	12.0593	-0.114445	0.761324	1
ENSMUST00000020107	ENSMUSG00000019943	Atp2b1	transcript	134.754	135.76	-0.0107246	0.954411	1
ENSMUST00000020109	ENSMUSG00000019948	Actr6	transcript	7.94837	8.00275	-0.00983808	0.972228	1
ENSMUST00000020112	ENSMUSG00000019951	Uhrf1bp1l	transcript	20.5151	19.5303	0.0709766	0.863675	1
ENSMUST00000020113	ENSMUSG00000019952	Poc1b	transcript	0.400861	0.118367	1.75984	0.125932	1
ENSMUST00000020118	ENSMUSG00000019960	Dusp6	transcript	18.9428	24.1906	-0.352802	0.371188	1
ENSMUST00000020123	ENSMUSG00000019961	Tmpo	transcript	2.15879	1.83471	0.234669	0.692006	1
ENSMUST00000020129	ENSMUSG00000019966	Kitl	transcript	0.186069	0.224324	-0.269751	0.872069	1
ENSMUST00000020145	ENSMUSG00000019970	Sgk1	transcript	11.0533	9.84197	0.16746	0.735849	1
ENSMUST00000020149	ENSMUSG00000019975	Ikbip	transcript	1.88813	1.77948	0.0854993	0.900746	1
ENSMUST00000020150	ENSMUSG00000019975	Ikbip	transcript	4.09972	4.36616	-0.0908415	0.86878	1
ENSMUST00000020153	ENSMUSG00000019977	Hbs1l	transcript	12.7047	13.154	-0.0501339	0.889589	1
ENSMUST00000020157	ENSMUSG00000019979	Apaf1	transcript	2.29014	1.70018	0.429753	0.482138	1
ENSMUST00000020158	ENSMUSG00000019982	Myb	transcript	0.016697	0.008202	1.02554	0.658035	1
ENSMUST00000020159	ENSMUSG00000019984	Med23	transcript	4.55075	3.83113	0.248334	0.606462	1
ENSMUST00000020161	ENSMUSG00000019987	Arg1	transcript	0.041653	0.00759767	2.45479	0.311481	1
ENSMUST00000020163	ENSMUSG00000019988	Nedd1	transcript	1.09155	0.967906	0.173433	0.802198	1
ENSMUST00000020165	ENSMUSG00000019990	Pde7b	transcript	19.7409	19.756	-0.00110464	0.978495	1
ENSMUST00000020169	ENSMUSG00000019989	Enpp3	transcript	0.160954	0.044366	1.85912	0.0844402	1
ENSMUST00000020171	ENSMUSG00000019997	Ctgf	transcript	11.8332	10.353	0.192797	0.673085	1
ENSMUST00000020173	ENSMUSG00000019996	Map7	transcript	0.513105	0.669583	-0.38401	0.597491	1
ENSMUST00000020174	ENSMUSG00000019998	Stx7	transcript	34.09	32.951	0.0490262	0.913789	1
ENSMUST00000020182	ENSMUSG00000020003	Pex7	transcript	3.70548	4.05935	-0.131588	0.888988	1
ENSMUST00000020185	ENSMUSG00000020007	Il20ra	transcript	0.283604	0.185095	0.615612	0.498507	1
ENSMUST00000020188	ENSMUSG00000020009	Ifngr1	transcript	6.03841	5.3728	0.168495	0.753072	1
ENSMUST00000020190	ENSMUSG00000020010	Vnn3	transcript	0.0218013	0.00577533	1.91644	0.475972	1
ENSMUST00000020197	ENSMUSG00000028886	Eya3	transcript	0	0.01594	#NAME?	0.0991888	1
ENSMUST00000020200	ENSMUSG00000020014	Cfap54	transcript	0.00610767	0.016816	-1.46114	0.643108	1
ENSMUST00000020203	ENSMUSG00000020018	Snrpf	transcript	7.17439	7.68763	-0.099683	0.855006	1
ENSMUST00000020204	ENSMUSG00000020019	Ntn4	transcript	3.13404	3.06855	0.0304661	0.966471	1
ENSMUST00000020208	ENSMUSG00000020021	Fgd6	transcript	3.0601	3.30639	-0.111679	0.785903	1
ENSMUST00000020209	ENSMUSG00000020022	Ndufa12	transcript	2.55735	2.53231	0.0141949	0.996296	1
ENSMUST00000020212	ENSMUSG00000020024	Cep83	transcript	9.13437	9.69668	-0.0861857	0.828353	1
ENSMUST00000020215	ENSMUSG00000020027	Socs2	transcript	4.54315	5.09249	-0.164681	0.744748	1
ENSMUST00000020217	ENSMUSG00000020029	Nudt4	transcript	46.3429	49.6794	-0.100302	0.761611	1
ENSMUST00000020220	ENSMUSG00000020032	Nuak1	transcript	20.6177	21.7384	-0.076362	0.817692	1
ENSMUST00000020223	ENSMUSG00000020034	Tcp11l2	transcript	6.49493	6.79195	-0.0645113	0.875593	1
ENSMUST00000020227	ENSMUSG00000020038	Cry1	transcript	7.62346	8.82009	-0.210347	0.62135	1
ENSMUST00000020231	ENSMUSG00000020042	Btbd11	transcript	4.18822	5.65627	-0.433514	0.410088	1
ENSMUST00000020234	ENSMUSG00000020044	Timp3	transcript	31.5226	31.1188	0.0186	0.980306	1
ENSMUST00000020238	ENSMUSG00000020048	Hsp90b1	transcript	108.7	123.907	-0.188903	0.56238	1
ENSMUST00000020241	ENSMUSG00000020051	Pah	transcript	0.129848	0.141235	-0.121274	0.921143	1
ENSMUST00000020243	ENSMUSG00000020052	Ascl1	transcript	1.66058	1.70242	-0.0359009	0.943763	1
ENSMUST00000020248	ENSMUSG00000020056	Ccdc53	transcript	2.56694	3.07056	-0.258451	0.71754	1
ENSMUST00000020249	ENSMUSG00000020057	Dram1	transcript	0.328757	0.340998	-0.0527417	0.942605	1
ENSMUST00000020251	ENSMUSG00000035311	Gnptab	transcript	16.1756	16.2595	-0.00745708	0.966584	1
ENSMUST00000020252	ENSMUSG00000020059	Sycp3	transcript	0.00377733	0.238816	-5.98239	0.0124421	0.610255
ENSMUST00000020253	ENSMUSG00000060002	Chpt1	transcript	9.15893	9.02997	0.0204576	0.978368	1
ENSMUST00000020255	ENSMUSG00000020062	Slc5a8	transcript	0.00719567	0.0137847	-0.937864	0.707059	1
ENSMUST00000020257	ENSMUSG00000020063	Sirt1	transcript	1.47444	0	Inf	0.000359302	0.0668525
ENSMUST00000020258	ENSMUSG00000020064	Herc4	transcript	9.16594	9.5917	-0.0655042	0.860703	1
ENSMUST00000020262	ENSMUSG00000020072	Pbld1	transcript	0.278297	0.260377	0.0960216	0.956805	1
ENSMUST00000020263	ENSMUSG00000020069	Hnrnph3	transcript	5.49302	6.58132	-0.260779	0.591364	1
ENSMUST00000020266	ENSMUSG00000020072	Pbld1	transcript	0.0509567	0.0342527	0.573055	0.665972	1
ENSMUST00000020268	ENSMUSG00000020074	Ccar1	transcript	9.76302	11.3485	-0.217109	0.582601	1
ENSMUST00000020270	ENSMUSG00000020076	Ddx50	transcript	19.4598	19.9152	-0.0333696	0.918742	1
ENSMUST00000020271	ENSMUSG00000020077	Srgn	transcript	2.89627	3.30777	-0.191663	0.808161	1
ENSMUST00000020273	ENSMUSG00000020079	Supv3l1	transcript	6.88381	6.82845	0.0116484	0.993049	1
ENSMUST00000020277	ENSMUSG00000020080	Hkdc1	transcript	2.01307	2.0985	-0.059962	0.907598	1
ENSMUST00000020278	ENSMUSG00000020081	Tacr2	transcript	0.126973	0.074656	0.766192	0.448637	1
ENSMUST00000020283	ENSMUSG00000020086	H2afy2	transcript	6.39073	6.79692	-0.088902	0.839553	1
ENSMUST00000020284	ENSMUSG00000020087	Tysnd1	transcript	6.04982	6.58017	-0.121232	0.790061	1
ENSMUST00000020285	ENSMUSG00000020088	Sar1a	transcript	42.4075	43.2104	-0.0270611	0.924294	1
ENSMUST00000020286	ENSMUSG00000020089	Ppa1	transcript	35.6244	35.7933	-0.00682614	0.971106	1
ENSMUST00000020287	ENSMUSG00000020090	Npffr1	transcript	0.844342	0.840381	0.00678336	1	1
ENSMUST00000020288	ENSMUSG00000020091	Eif4ebp2	transcript	15.419	16.9856	-0.139605	0.733524	1
ENSMUST00000020289	ENSMUSG00000020092	Pald1	transcript	2.82828	2.35327	0.265258	0.621432	1
ENSMUST00000020298	ENSMUSG00000020098	Pcbd1	transcript	4.69325	3.88638	0.27216	0.698821	1
ENSMUST00000020301	ENSMUSG00000020101	4632428N05Rik	transcript	4.10428	3.28237	0.322392	0.502492	1
ENSMUST00000020307	ENSMUSG00000020107	Anapc16	transcript	3.31618	3.74658	-0.176052	0.768526	1
ENSMUST00000020308	ENSMUSG00000020108	Ddit4	transcript	25.2312	22.4808	0.166517	0.718562	1
[truncated: 46,719 more rows]
