# Supplementary material for: Identifying lncRNA–miRNA–mRNA networks to investigate Alzheimer’s disease pathogenesis and therapy strategy
Source: Aging (Albany NY). 2020 Feb 7;12(3):2897–920. doi: 10.18632/aging.102785 (PMC7041741; doi:10.18632/aging.102785)
Supplement: Supplementary Table 7 [file aging-12-102785-s005..xlsx]

## Sheet: node
Supplemental Table S7. Nodes interactions in the 6yes9no group
mmu-miR-540-3p	Tfe3
mmu-miR-193b-3p	Tpd52l2
mmu-miR-193b-3p	Pfdn5
mmu-miR-669f-3p	Psmc3
mmu-miR-449a-5p	Cd36
novel_423	Cd36
mmu-miR-122-5p	Klf4
mmu-miR-135b-5p	Dgcr2
mmu-miR-3068-3p	Dgcr2
mmu-miR-31-5p	Dgcr2
mmu-miR-467a-3p	Cyth2
mmu-miR-467d-3p	Wwox
mmu-miR-122-5p	Prdx2
mmu-miR-193b-3p	Celf1
mmu-miR-190a-5p	Homer1
mmu-miR-669f-3p	Hipk1
mmu-miR-467d-3p	Pdcl
mmu-miR-449a-5p	Tusc2
novel_423	Tusc2
mmu-miR-138-5p	Plin5
mmu-miR-122-5p	Sptbn4
mmu-miR-365-3p	Sptbn4
mmu-miR-128-2-5p	Ttll5
mmu-miR-7688-5p	Ttll5
novel_423	Cad
mmu-miR-467d-3p	Prpf3
mmu-miR-128-2-5p	Ncf1
mmu-miR-7688-5p	Ncf1
mmu-miR-193b-3p	Wnt11
mmu-miR-192-5p	Vps53
mmu-miR-467a-3p	Elmo2
novel_423	Etv4
mmu-miR-206-3p	Med1
mmu-miR-466i-5p	Med1
mmu-miR-467d-3p	Tbx3
mmu-miR-467a-3p	Mgat4c
mmu-miR-3068-3p	Osbp2
mmu-miR-31-5p	Osbp2
mmu-miR-6933-5p	Dvl2
mmu-miR-3097-3p	Stat5b
mmu-miR-193b-3p	Mlh3
mmu-miR-467d-3p	Irf4
mmu-miR-193b-3p	Fancc
mmu-miR-190a-5p	Ptch1
mmu-miR-7688-5p	Hnrnpk
mmu-miR-449a-5p	Ldb3
novel_423	Ldb3
mmu-miR-138-5p	Nisch
mmu-miR-128-2-5p	Dab2
mmu-miR-7688-5p	Dab2
mmu-miR-206-3p	Rab2b
mmu-miR-466i-5p	Rab2b
mmu-miR-449a-5p	Rangap1
novel_423	Rangap1
mmu-miR-122b-3p	Rapgef3
mmu-miR-135b-5p	Rapgef3
mmu-miR-31-5p	Rapgef3
mmu-miR-122-5p	Fopnl
mmu-miR-192-5p	Sidt1
mmu-miR-669f-3p	Lrrc74b
mmu-miR-122-5p	Clcn2
mmu-miR-122-5p	Adamts1
mmu-miR-365-3p	Adamts1
mmu-miR-6933-5p	Fmnl3
mmu-miR-669f-3p	Myom1
mmu-miR-3097-3p	Sncaip
mmu-miR-466i-5p	Sncaip
mmu-miR-467a-3p	Smarca2
mmu-miR-7688-5p	Pfkfb1
mmu-miR-122b-3p	Paip1
mmu-miR-193b-3p	Cyp2e1
mmu-miR-467d-3p	Lancl1
mmu-miR-365-3p	Als2
mmu-miR-128-2-5p	Dst
mmu-miR-7688-5p	Dst
mmu-miR-449a-5p	Fn1
novel_423	Fn1
mmu-miR-122b-3p	Glb1l
mmu-miR-192-5p	Glb1l
mmu-miR-467d-3p	43710
mmu-miR-128-2-5p	Atg4b
mmu-miR-206-3p	Cfh
mmu-miR-3097-3p	Cfh
mmu-miR-466i-5p	Cfh
mmu-miR-138-5p	Srp9
mmu-miR-6933-5p	Pou2f1
mmu-miR-6933-5p	Cr2
mmu-miR-135b-5p	Olah
mmu-miR-192-5p	Olah
mmu-miR-669f-3p	Mllt10
mmu-miR-206-3p	St6galnac6
mmu-miR-3097-3p	St6galnac6
mmu-miR-466i-5p	St6galnac6
mmu-miR-122-5p	Ak1
mmu-miR-365-3p	Ak1
mmu-miR-467a-3p	Zeb2
mmu-miR-190a-5p	Lhx6
mmu-miR-467d-3p	Brd3
mmu-miR-190a-5p	Xirp2
mmu-miR-540-3p	Tfpi
mmu-miR-669f-3p	Sema6d
mmu-miR-122-5p	Mapk8ip1
mmu-miR-122-5p	Arhgap1
mmu-miR-206-3p	Ltk
mmu-miR-122b-3p	Spint1
mmu-miR-192-5p	Spint1
mmu-miR-449a-5p	Gnas
novel_423	Gnas
mmu-miR-365-3p	Glrb
mmu-miR-122b-3p	Pear1
mmu-miR-192-5p	Pear1
mmu-miR-138-5p	Tars2
mmu-miR-135b-5p	Dapp1
mmu-miR-3068-3p	Dapp1
mmu-miR-31-5p	Dapp1
mmu-miR-122-5p	Cryz
mmu-miR-6933-5p	Hsdl2
mmu-miR-365-3p	Psip1
mmu-miR-6933-5p	Lrp8
mmu-miR-6933-5p	Eif2b3
mmu-miR-128-2-5p	Srrm1
mmu-miR-669f-3p	Rnf32
mmu-miR-540-3p	Tec
mmu-miR-128-2-5p	Rchy1
mmu-miR-7688-5p	Rchy1
mmu-miR-138-5p	Naaa
mmu-miR-467d-3p	P2rx7
mmu-miR-6933-5p	Kdm2b
mmu-miR-206-3p	Cit
mmu-miR-3097-3p	Cit
mmu-miR-466i-5p	Cit
mmu-miR-190a-5p	Zkscan1
mmu-miR-122b-3p	Pcyox1
mmu-miR-135b-5p	Pcyox1
mmu-miR-3068-3p	Pcyox1
mmu-miR-31-5p	Pcyox1
mmu-miR-540-3p	Pole4
mmu-miR-669f-3p	Klf15
mmu-miR-365-3p	Lrrc23
mmu-miR-6933-5p	Aebp2
mmu-miR-6933-5p	Ercc2
mmu-miR-206-3p	Psd3
mmu-miR-3097-3p	Psd3
mmu-miR-466i-5p	Psd3
mmu-miR-122-5p	Pcsk6
mmu-miR-122-5p	Rasgrp4
mmu-miR-190a-5p	Far1
mmu-miR-122-5p	Parva
mmu-miR-365-3p	Parva
mmu-miR-449a-5p	Cttn
novel_423	Cttn
mmu-miR-449a-5p	Atp11a
novel_423	Atp11a
mmu-miR-467a-3p	Agpat5
mmu-miR-467d-3p	Cnot7
mmu-miR-128-2-5p	Pde4c
mmu-miR-7688-5p	Pde4c
mmu-miR-122b-3p	Usp2
mmu-miR-135b-5p	Usp2
mmu-miR-3068-3p	Usp2
mmu-miR-31-5p	Usp2
mmu-miR-190a-5p	Il10ra
mmu-miR-467a-3p	Rnf111
mmu-miR-128-2-5p	Rwdd2a
mmu-miR-7688-5p	Rwdd2a
mmu-miR-449a-5p	Tgfbr2
novel_423	Tgfbr2
mmu-miR-365-3p	Arap1
mmu-miR-206-3p	Prr5l
mmu-miR-466i-5p	Prr5l
mmu-miR-122b-3p	Acsl3
mmu-miR-135b-5p	Acsl3
mmu-miR-3068-3p	Acsl3
mmu-miR-31-5p	Acsl3
mmu-miR-449a-5p	Gmppa
mmu-miR-122-5p	Triobp
mmu-miR-365-3p	Triobp
mmu-miR-365-3p	Cnppd1
mmu-miR-190a-5p	Mgll
mmu-miR-138-5p	Hsf4
mmu-miR-192-5p	Dnm2
mmu-miR-467a-3p	Idua
mmu-miR-540-3p	Znrf1
mmu-miR-122b-3p	St18
mmu-miR-192-5p	St18
mmu-miR-206-3p	Rbm46
mmu-miR-3097-3p	Rbm46
mmu-miR-466i-5p	Rbm46
mmu-miR-128-2-5p	Phka1
mmu-miR-7688-5p	Phka1
mmu-miR-669f-3p	Fstl5
mmu-miR-138-5p	Vav1
mmu-miR-193b-3p	R3hcc1
mmu-miR-365-3p	Exosc1
mmu-miR-193b-3p	Myo5a
mmu-miR-128-2-5p	Mfrp
mmu-miR-7688-5p	Mfrp
mmu-miR-540-3p	Celf5
mmu-miR-135b-5p	Lars2
mmu-miR-3068-3p	Lars2
mmu-miR-31-5p	Lars2
mmu-miR-3097-3p	Tdrd7
mmu-miR-190a-5p	Cd276
mmu-miR-467a-3p	43525
mmu-miR-540-3p	Sbf1
mmu-miR-540-3p	Etl4
mmu-miR-138-5p	Stag1
mmu-miR-190a-5p	Tbcel
mmu-miR-467d-3p	Fbxo27
mmu-miR-6933-5p	Sbf2
mmu-miR-138-5p	Dcun1d2
mmu-miR-540-3p	Rad9b
mmu-miR-128-2-5p	Rbpj
mmu-miR-122b-3p	Arid4b
mmu-miR-192-5p	Arid4b
mmu-miR-449a-5p	Mettl22
novel_423	Mettl22
mmu-miR-190a-5p	Stau1
mmu-miR-669f-3p	Bmf
mmu-miR-540-3p	Zmym5
mmu-miR-467d-3p	Plekha1
mmu-miR-6933-5p	Tlx3
mmu-miR-3097-3p	Oaz2
mmu-miR-192-5p	Zmynd15
mmu-miR-138-5p	Ino80d
mmu-miR-122-5p	Rcc2
mmu-miR-467a-3p	Arhgef10l
mmu-miR-128-2-5p	Uspl1
mmu-miR-7688-5p	Uspl1
mmu-miR-135b-5p	Mdfic
mmu-miR-3068-3p	Mdfic
mmu-miR-31-5p	Mdfic
mmu-miR-138-5p	Tardbp
mmu-miR-192-5p	Cdc42ep4
mmu-miR-467d-3p	Pi4ka
mmu-miR-449a-5p	Plekha6
novel_423	Plekha6
mmu-miR-193b-3p	Acacb
mmu-miR-467d-3p	Nxt2
mmu-miR-138-5p	Adora1
mmu-miR-138-5p	Zfp532
mmu-miR-128-2-5p	Zmym4
mmu-miR-7688-5p	Zmym4
mmu-miR-128-2-5p	Synpo
mmu-miR-135b-5p	Hexim2
mmu-miR-3068-3p	Hexim2
mmu-miR-31-5p	Hexim2
mmu-miR-122b-3p	Zbtb37
mmu-miR-192-5p	Zbtb37
mmu-miR-31-5p	Zbtb37
mmu-miR-193b-3p	Crb3
mmu-miR-540-3p	Cage1
mmu-miR-365-3p	Lingo2
mmu-miR-190a-5p	Zfp629
mmu-miR-190a-5p	Thtpa
mmu-miR-3097-3p	Adra1a
mmu-miR-466i-5p	Adra1a
mmu-miR-6933-5p	Tmem229b
mmu-miR-138-5p	Zfp740
mmu-miR-7688-5p	Morc2b
mmu-miR-6933-5p	Tmsb4x
mmu-miR-206-3p	Lgals3
mmu-miR-3097-3p	Lgals3
mmu-miR-466i-5p	Lgals3
mmu-miR-540-3p	Siglech
mmu-miR-540-3p	Pcdh15
mmu-miR-467d-3p	Rnaseh2a
mmu-miR-669f-3p	Chchd3
mmu-miR-669f-3p	Fgfr3
mmu-miR-135b-5p	Ncoa4
mmu-miR-3068-3p	Ncoa4
mmu-miR-31-5p	Ncoa4
mmu-miR-540-3p	Mpz
mmu-miR-193b-3p	Lrrc48
mmu-miR-190a-5p	Usp13
mmu-miR-206-3p	Skap1
mmu-miR-3097-3p	Skap1
mmu-miR-466i-5p	Skap1
mmu-miR-122b-3p	Cep170
mmu-miR-135b-5p	Cep170
mmu-miR-3068-3p	Cep170
mmu-miR-31-5p	Cep170
mmu-miR-190a-5p	Gapdh
mmu-miR-467a-3p	Sema3b
mmu-miR-193b-3p	Txndc9
mmu-miR-669f-3p	Nrf1
mmu-miR-206-3p	Anks1b
mmu-miR-3097-3p	Anks1b
mmu-miR-466i-5p	Anks1b
mmu-miR-193b-3p	Ntng1
mmu-miR-449a-5p	Tnip2
mmu-miR-449a-5p	Grb2
novel_423	Grb2
mmu-miR-138-5p	9430015G10Rik
mmu-miR-192-5p	Fhit
mmu-miR-467a-3p	Sfmbt2
mmu-miR-206-3p	Tmem151a
mmu-miR-3097-3p	Tmem151a
mmu-miR-466i-5p	Tmem151a
mmu-miR-669f-3p	Zfp229
mmu-miR-467a-3p	Crem
mmu-miR-6933-5p	Tnfrsf13c
mmu-miR-193b-3p	Myadm
mmu-miR-449a-5p	Dap3
novel_423	Dap3
mmu-miR-365-3p	Fcho1
mmu-miR-122b-3p	Fat1
mmu-miR-135b-5p	Fat1
mmu-miR-3068-3p	Fat1
mmu-miR-31-5p	Fat1
mmu-miR-540-3p	Trpc2
mmu-miR-365-3p	Rbm47
mmu-miR-122b-3p	Tia1
mmu-miR-192-5p	Tia1
mmu-miR-669f-3p	Ccl27a
mmu-miR-467a-3p	Omp
mmu-miR-122b-3p	Emc1
mmu-miR-192-5p	Emc1
mmu-miR-3068-3p	Emc1
mmu-miR-31-5p	Emc1
mmu-miR-467a-3p	Zfp931
mmu-miR-206-3p	Gm14326
mmu-miR-3097-3p	Gm14326
mmu-miR-466i-5p	Gm14326
mmu-miR-135b-5p	Gm14434
mmu-miR-3068-3p	Gm14434
mmu-miR-206-3p	Tmem240
mmu-miR-7688-5p	Apol11b
mmu-miR-135b-5p	Pcdhgb1
mmu-miR-3068-3p	Pcdhgb1
mmu-miR-135b-5p	ENSMUST00000123998.1
mmu-miR-365-3p	ENSMUST00000123998.1
mmu-miR-540-3p	ENSMUST00000123998.1
mmu-miR-6933-5p	ENSMUST00000123998.1
mmu-miR-365-3p	ENSMUST00000124298.1
mmu-miR-449a-5p	ENSMUST00000128904.1
mmu-miR-669f-3p	ENSMUST00000128904.1
mmu-miR-6933-5p	ENSMUST00000128904.1
mmu-miR-122-5p	ENSMUST00000139095.1
mmu-miR-466i-5p	ENSMUST00000139095.1
mmu-miR-540-3p	ENSMUST00000139095.1
mmu-miR-6933-5p	ENSMUST00000139095.1
mmu-miR-135b-5p	ENSMUST00000186535.1
mmu-miR-466i-5p	ENSMUST00000186535.1
mmu-miR-135b-5p	LNC_000007
mmu-miR-3097-3p	LNC_000007
mmu-miR-128-2-5p	LNC_000033
mmu-miR-135b-5p	LNC_000033
mmu-miR-3097-3p	LNC_000033
mmu-miR-31-5p	LNC_000033
mmu-miR-449a-5p	LNC_000033
mmu-miR-449a-5p	LNC_000067
mmu-miR-193b-3p	LNC_000152
mmu-miR-7688-5p	LNC_000152
mmu-miR-365-3p	LNC_000200
mmu-miR-6933-5p	LNC_000348
mmu-miR-3068-3p	LNC_000429
mmu-miR-206-3p	LNC_000462
mmu-miR-128-2-5p	LNC_000494
mmu-miR-206-3p	LNC_000494
mmu-miR-3068-3p	LNC_000494
mmu-miR-365-3p	LNC_000494
mmu-miR-467a-3p	LNC_000494
mmu-miR-467d-3p	LNC_000494
mmu-miR-669f-3p	LNC_000494
mmu-miR-122b-3p	LNC_000782
mmu-miR-192-5p	LNC_000782
mmu-miR-206-3p	LNC_000782
mmu-miR-3068-3p	LNC_000782
mmu-miR-31-5p	LNC_000782
mmu-miR-365-3p	LNC_000782
mmu-miR-6933-5p	LNC_000782
mmu-miR-122-5p	LNC_000854
mmu-miR-122b-3p	LNC_000854
mmu-miR-128-2-5p	LNC_000854
mmu-miR-3097-3p	LNC_000854
mmu-miR-467d-3p	LNC_000977
mmu-miR-6933-5p	LNC_000977
mmu-miR-7688-5p	LNC_001023
mmu-miR-122b-3p	LNC_001058
mmu-miR-128-2-5p	LNC_001058
mmu-miR-138-5p	LNC_001058
mmu-miR-192-5p	LNC_001058
mmu-miR-467a-3p	LNC_001058
mmu-miR-7688-5p	LNC_001058
novel_423	LNC_001058
mmu-miR-128-2-5p	LNC_001062
mmu-miR-192-5p	LNC_001062
mmu-miR-467a-3p	LNC_001062
novel_423	LNC_001062
mmu-miR-138-5p	LNC_001086
mmu-miR-31-5p	LNC_001086
mmu-miR-135b-5p	LNC_001173
mmu-miR-206-3p	LNC_001173
mmu-miR-3068-3p	LNC_001173
mmu-miR-31-5p	LNC_001173
mmu-miR-365-3p	LNC_001173
mmu-miR-449a-5p	LNC_001173
mmu-miR-540-3p	LNC_001173
novel_423	LNC_001173
mmu-miR-193b-3p	LNC_001186
mmu-miR-7688-5p	LNC_001186
mmu-miR-122-5p	LNC_001450
mmu-miR-3068-3p	LNC_001450
mmu-miR-466i-5p	LNC_001450
mmu-miR-540-3p	LNC_001450
mmu-miR-6933-5p	LNC_001450
mmu-miR-122-5p	LNC_001451
mmu-miR-193b-3p	LNC_001451
mmu-miR-3068-3p	LNC_001451
mmu-miR-540-3p	LNC_001451
mmu-miR-6933-5p	LNC_001451
mmu-miR-138-5p	LNC_001561
mmu-miR-466i-5p	LNC_001561
mmu-miR-467a-3p	LNC_001624
mmu-miR-669f-3p	LNC_001624
mmu-miR-190a-5p	LNC_001773
mmu-miR-365-3p	LNC_001773
mmu-miR-192-5p	LNC_001809
mmu-miR-449a-5p	LNC_001809
novel_423	LNC_001809
mmu-miR-193b-3p	LNC_001817
mmu-miR-3097-3p	LNC_001817
mmu-miR-365-3p	LNC_001817
mmu-miR-449a-5p	LNC_001817
mmu-miR-467a-3p	LNC_001817
mmu-miR-467d-3p	LNC_001817
mmu-miR-540-3p	LNC_001817
mmu-miR-669f-3p	LNC_001817
mmu-miR-122b-3p	LNC_001819
mmu-miR-138-5p	LNC_001819
mmu-miR-193b-3p	LNC_001819
mmu-miR-3097-3p	LNC_001819
mmu-miR-365-3p	LNC_001819
mmu-miR-466i-5p	LNC_001819
mmu-miR-467a-3p	LNC_001819
mmu-miR-467d-3p	LNC_001819
mmu-miR-669f-3p	LNC_001819
mmu-miR-7688-5p	LNC_001819
mmu-miR-122b-3p	LNC_001820
mmu-miR-138-5p	LNC_001820
mmu-miR-193b-3p	LNC_001820
mmu-miR-3097-3p	LNC_001820
mmu-miR-365-3p	LNC_001820
mmu-miR-466i-5p	LNC_001820
mmu-miR-467a-3p	LNC_001820
mmu-miR-467d-3p	LNC_001820
mmu-miR-540-3p	LNC_001820
mmu-miR-669f-3p	LNC_001820
mmu-miR-7688-5p	LNC_001820
mmu-miR-122-5p	LNC_001887
mmu-miR-193b-3p	LNC_001887
mmu-miR-449a-5p	LNC_001887
mmu-miR-135b-5p	LNC_001977
mmu-miR-138-5p	LNC_001977
mmu-miR-122b-3p	LNC_002078
mmu-miR-128-2-5p	LNC_002078
mmu-miR-138-5p	LNC_002078
mmu-miR-190a-5p	LNC_002078
mmu-miR-206-3p	LNC_002078
mmu-miR-31-5p	LNC_002078
mmu-miR-365-3p	LNC_002078
mmu-miR-466i-5p	LNC_002078
mmu-miR-7688-5p	LNC_002078
mmu-miR-466i-5p	LNC_002115
mmu-miR-122b-3p	LNC_002163
mmu-miR-135b-5p	LNC_002163
mmu-miR-190a-5p	LNC_002163
mmu-miR-193b-3p	LNC_002163
mmu-miR-466i-5p	LNC_002163
mmu-miR-7688-5p	LNC_002163
novel_423	LNC_002163
mmu-miR-122-5p	LNC_002205
mmu-miR-122b-3p	LNC_002205
mmu-miR-138-5p	LNC_002205
mmu-miR-3068-3p	LNC_002205
mmu-miR-540-3p	LNC_002205
mmu-miR-3097-3p	LNC_002445
mmu-miR-193b-3p	LNC_002456
mmu-miR-6933-5p	LNC_002456
mmu-miR-7688-5p	LNC_002456
mmu-miR-193b-3p	LNC_002500
mmu-miR-128-2-5p	LNC_002638
mmu-miR-122-5p	LNC_002746
mmu-miR-135b-5p	LNC_002746
mmu-miR-138-5p	LNC_002746
mmu-miR-192-5p	LNC_002746
mmu-miR-31-5p	LNC_002746
mmu-miR-365-3p	LNC_002746
mmu-miR-467a-3p	LNC_002746
mmu-miR-669f-3p	LNC_002746
novel_423	LNC_002746
mmu-miR-467a-3p	LNC_002771
mmu-miR-7688-5p	LNC_002825
mmu-miR-206-3p	LNC_002956
mmu-miR-540-3p	LNC_003067
mmu-miR-122b-3p	LNC_003195
mmu-miR-122-5p	LNC_003197
mmu-miR-138-5p	LNC_003197
mmu-miR-192-5p	LNC_003197
mmu-miR-206-3p	LNC_003197
mmu-miR-31-5p	LNC_003197
mmu-miR-122-5p	LNC_003206
mmu-miR-192-5p	LNC_003206
mmu-miR-467a-3p	LNC_003206
mmu-miR-467d-3p	LNC_003206
mmu-miR-540-3p	LNC_003206
mmu-miR-669f-3p	LNC_003206
novel_423	LNC_003206
mmu-miR-122-5p	LNC_003458
mmu-miR-449a-5p	LNC_003458
mmu-miR-193b-3p	LNC_003686
mmu-miR-128-2-5p	LNC_003732
mmu-miR-206-3p	LNC_003838
mmu-miR-365-3p	LNC_003967
mmu-miR-466i-5p	LNC_003967
mmu-miR-6933-5p	LNC_003980
mmu-miR-193b-3p	LNC_003999
mmu-miR-3097-3p	LNC_003999
novel_423	LNC_003999
mmu-miR-466i-5p	LNC_004043
mmu-miR-540-3p	LNC_004057
mmu-miR-135b-5p	LNC_004062
mmu-miR-192-5p	LNC_004062
mmu-miR-466i-5p	LNC_004062
mmu-miR-7688-5p	LNC_004062
mmu-miR-466i-5p	LNC_004071
mmu-miR-138-5p	LNC_004100
mmu-miR-122-5p	LNC_004148
mmu-miR-193b-3p	LNC_004148
mmu-miR-31-5p	LNC_004176
mmu-miR-467a-3p	LNC_004490
mmu-miR-669f-3p	LNC_004490
mmu-miR-122-5p	LNC_004514
mmu-miR-135b-5p	LNC_004514
mmu-miR-3068-3p	LNC_004514
mmu-miR-31-5p	LNC_004514
mmu-miR-467a-3p	LNC_004514
mmu-miR-669f-3p	LNC_004514
mmu-miR-135b-5p	LNC_004554
mmu-miR-192-5p	LNC_004554
mmu-miR-206-3p	LNC_004554
mmu-miR-6933-5p	LNC_004554
mmu-miR-3097-3p	LNC_004561
mmu-miR-7688-5p	LNC_004561
mmu-miR-192-5p	LNC_004628
mmu-miR-122-5p	LNC_004707
mmu-miR-122b-3p	LNC_004707
mmu-miR-135b-5p	LNC_004707
mmu-miR-138-5p	LNC_004707
mmu-miR-365-3p	LNC_004707
mmu-miR-466i-5p	LNC_004707
mmu-miR-540-3p	LNC_004707
mmu-miR-7688-5p	LNC_004707
novel_423	LNC_004707
mmu-miR-138-5p	LNC_004760
mmu-miR-206-3p	LNC_004784
mmu-miR-466i-5p	LNC_004784
mmu-miR-31-5p	LNC_004801
mmu-miR-449a-5p	LNC_004801
novel_423	LNC_004801
mmu-miR-449a-5p	LNC_005017
mmu-miR-3097-3p	LNC_005078
mmu-miR-31-5p	LNC_005078
mmu-miR-449a-5p	LNC_005078
mmu-miR-6933-5p	LNC_005078
mmu-miR-128-2-5p	LNC_005400
mmu-miR-3097-3p	LNC_005400
mmu-miR-31-5p	LNC_005400
mmu-miR-540-3p	LNC_005400
mmu-miR-193b-3p	LNC_005444
mmu-miR-31-5p	LNC_005691
mmu-miR-206-3p	LNC_005818
mmu-miR-449a-5p	LNC_005857
mmu-miR-540-3p	LNC_005857
mmu-miR-122b-3p	LNC_005904
mmu-miR-135b-5p	LNC_006081
mmu-miR-190a-5p	LNC_006081
mmu-miR-3097-3p	LNC_006081
mmu-miR-31-5p	LNC_006081
mmu-miR-449a-5p	LNC_006081
mmu-miR-540-3p	LNC_006081
mmu-miR-206-3p	LNC_006179
mmu-miR-3068-3p	LNC_006277
mmu-miR-365-3p	LNC_006277
mmu-miR-449a-5p	LNC_006277
mmu-miR-467a-3p	LNC_006277
mmu-miR-669f-3p	LNC_006277
mmu-miR-122b-3p	LNC_006285
mmu-miR-193b-3p	LNC_006285
mmu-miR-122b-3p	LNC_006313
mmu-miR-122-5p	LNC_006482
mmu-miR-135b-5p	LNC_006482
mmu-miR-449a-5p	LNC_006482
mmu-miR-206-3p	LNC_006537
novel_423	LNC_006537
mmu-miR-31-5p	LNC_006588
mmu-miR-7688-5p	LNC_006588
mmu-miR-135b-5p	LNC_006672
mmu-miR-3068-3p	LNC_006672
mmu-miR-122b-3p	LNC_006817
mmu-miR-206-3p	LNC_006817
mmu-miR-467a-3p	LNC_006817
mmu-miR-669f-3p	LNC_006817
mmu-miR-122b-3p	LNC_006818
mmu-miR-138-5p	LNC_006818
mmu-miR-206-3p	LNC_006818
mmu-miR-467a-3p	LNC_006818
mmu-miR-669f-3p	LNC_006818
mmu-miR-138-5p	LNC_006833
mmu-miR-7688-5p	LNC_006833

## Sheet: type
Supplementary Table S7. Nodes types in the 6yes9no group
Tfe3	up	gene
Tpd52l2	up	gene
Pfdn5	up	gene
Psmc3	up	gene
Cd36	up	gene
Cd36	up	gene
Klf4	up	gene
Dgcr2	up	gene
Dgcr2	up	gene
Dgcr2	up	gene
Cyth2	up	gene
Wwox	up	gene
Prdx2	up	gene
Celf1	up	gene
Homer1	up	gene
Hipk1	up	gene
Pdcl	up	gene
Tusc2	up	gene
Tusc2	up	gene
Plin5	up	gene
Sptbn4	up	gene
Sptbn4	up	gene
Ttll5	up	gene
Ttll5	up	gene
Cad	up	gene
Prpf3	up	gene
Ncf1	up	gene
Ncf1	up	gene
Wnt11	up	gene
Vps53	up	gene
Elmo2	up	gene
Etv4	up	gene
Med1	up	gene
Med1	up	gene
Tbx3	up	gene
Mgat4c	up	gene
Osbp2	up	gene
Osbp2	up	gene
Dvl2	up	gene
Stat5b	up	gene
Mlh3	up	gene
Irf4	up	gene
Fancc	up	gene
Ptch1	up	gene
Hnrnpk	up	gene
Ldb3	up	gene
Ldb3	up	gene
Nisch	up	gene
Dab2	up	gene
Dab2	up	gene
Rab2b	up	gene
Rab2b	up	gene
Rangap1	up	gene
Rangap1	up	gene
Rapgef3	up	gene
Rapgef3	up	gene
Rapgef3	up	gene
Fopnl	up	gene
Sidt1	up	gene
Lrrc74b	up	gene
Clcn2	up	gene
Adamts1	up	gene
Adamts1	up	gene
Fmnl3	up	gene
Myom1	up	gene
Sncaip	up	gene
Sncaip	up	gene
Smarca2	up	gene
Pfkfb1	up	gene
Paip1	up	gene
Cyp2e1	up	gene
Lancl1	up	gene
Als2	up	gene
Dst	up	gene
Dst	up	gene
Fn1	up	gene
Fn1	up	gene
Glb1l	up	gene
Glb1l	up	gene
43710	up	gene
Atg4b	up	gene
Cfh	up	gene
Cfh	up	gene
Cfh	up	gene
Srp9	up	gene
Pou2f1	up	gene
Cr2	up	gene
Olah	up	gene
Olah	up	gene
Mllt10	up	gene
St6galnac6	up	gene
St6galnac6	up	gene
St6galnac6	up	gene
Ak1	up	gene
Ak1	up	gene
Zeb2	up	gene
Lhx6	up	gene
Brd3	up	gene
Xirp2	up	gene
Tfpi	up	gene
Sema6d	up	gene
Mapk8ip1	up	gene
Arhgap1	up	gene
Ltk	up	gene
Spint1	up	gene
Spint1	up	gene
Gnas	up	gene
Gnas	up	gene
Glrb	up	gene
Pear1	up	gene
Pear1	up	gene
Tars2	up	gene
Dapp1	up	gene
Dapp1	up	gene
Dapp1	up	gene
Cryz	up	gene
Hsdl2	up	gene
Psip1	up	gene
Lrp8	up	gene
Eif2b3	up	gene
Srrm1	up	gene
Rnf32	up	gene
Tec	up	gene
Rchy1	up	gene
Rchy1	up	gene
Naaa	up	gene
P2rx7	up	gene
Kdm2b	up	gene
Cit	up	gene
Cit	up	gene
Cit	up	gene
Zkscan1	up	gene
Pcyox1	up	gene
Pcyox1	up	gene
Pcyox1	up	gene
Pcyox1	up	gene
Pole4	up	gene
Klf15	up	gene
Lrrc23	up	gene
Aebp2	up	gene
Ercc2	up	gene
Psd3	up	gene
Psd3	up	gene
Psd3	up	gene
Pcsk6	up	gene
Rasgrp4	up	gene
Far1	up	gene
Parva	up	gene
Parva	up	gene
Cttn	up	gene
Cttn	up	gene
Atp11a	up	gene
Atp11a	up	gene
Agpat5	up	gene
Cnot7	up	gene
Pde4c	up	gene
Pde4c	up	gene
Usp2	up	gene
Usp2	up	gene
Usp2	up	gene
Usp2	up	gene
Il10ra	up	gene
Rnf111	up	gene
Rwdd2a	up	gene
Rwdd2a	up	gene
Tgfbr2	up	gene
Tgfbr2	up	gene
Arap1	up	gene
Prr5l	up	gene
Prr5l	up	gene
Acsl3	up	gene
Acsl3	up	gene
Acsl3	up	gene
Acsl3	up	gene
Gmppa	up	gene
Triobp	up	gene
Triobp	up	gene
Cnppd1	up	gene
Mgll	up	gene
Hsf4	up	gene
Dnm2	up	gene
Idua	up	gene
Znrf1	up	gene
St18	up	gene
St18	up	gene
Rbm46	up	gene
Rbm46	up	gene
Rbm46	up	gene
Phka1	up	gene
Phka1	up	gene
Fstl5	up	gene
Vav1	up	gene
R3hcc1	up	gene
Exosc1	up	gene
Myo5a	up	gene
Mfrp	up	gene
Mfrp	up	gene
Celf5	up	gene
Lars2	up	gene
Lars2	up	gene
Lars2	up	gene
Tdrd7	up	gene
Cd276	up	gene
43525	up	gene
Sbf1	up	gene
Etl4	up	gene
Stag1	up	gene
Tbcel	up	gene
Fbxo27	up	gene
Sbf2	up	gene
Dcun1d2	up	gene
Rad9b	up	gene
Rbpj	up	gene
Arid4b	up	gene
Arid4b	up	gene
Mettl22	up	gene
Mettl22	up	gene
Stau1	up	gene
Bmf	up	gene
Zmym5	up	gene
Plekha1	up	gene
Tlx3	up	gene
Oaz2	up	gene
Zmynd15	up	gene
Ino80d	up	gene
Rcc2	up	gene
Arhgef10l	up	gene
Uspl1	up	gene
Uspl1	up	gene
Mdfic	up	gene
Mdfic	up	gene
Mdfic	up	gene
Tardbp	up	gene
Cdc42ep4	up	gene
Pi4ka	up	gene
Plekha6	up	gene
Plekha6	up	gene
Acacb	up	gene
Nxt2	up	gene
Adora1	up	gene
Zfp532	up	gene
Zmym4	up	gene
Zmym4	up	gene
Synpo	up	gene
Hexim2	up	gene
Hexim2	up	gene
Hexim2	up	gene
Zbtb37	up	gene
Zbtb37	up	gene
Zbtb37	up	gene
Crb3	up	gene
Cage1	up	gene
Lingo2	up	gene
Zfp629	up	gene
Thtpa	up	gene
Adra1a	up	gene
Adra1a	up	gene
Tmem229b	up	gene
Zfp740	up	gene
Morc2b	up	gene
Tmsb4x	up	gene
Lgals3	up	gene
Lgals3	up	gene
Lgals3	up	gene
Siglech	up	gene
Pcdh15	up	gene
Rnaseh2a	up	gene
Chchd3	up	gene
Fgfr3	up	gene
Ncoa4	up	gene
Ncoa4	up	gene
Ncoa4	up	gene
Mpz	up	gene
Lrrc48	up	gene
Usp13	up	gene
Skap1	up	gene
Skap1	up	gene
Skap1	up	gene
Cep170	up	gene
Cep170	up	gene
Cep170	up	gene
Cep170	up	gene
Gapdh	up	gene
Sema3b	up	gene
Txndc9	up	gene
Nrf1	up	gene
Anks1b	up	gene
Anks1b	up	gene
Anks1b	up	gene
Ntng1	up	gene
Tnip2	up	gene
Grb2	up	gene
Grb2	up	gene
9430015G10Rik	up	gene
Fhit	up	gene
Sfmbt2	up	gene
Tmem151a	up	gene
Tmem151a	up	gene
Tmem151a	up	gene
Zfp229	up	gene
Crem	up	gene
Tnfrsf13c	up	gene
Myadm	up	gene
Dap3	up	gene
Dap3	up	gene
Fcho1	up	gene
Fat1	up	gene
Fat1	up	gene
Fat1	up	gene
Fat1	up	gene
Trpc2	up	gene
Rbm47	up	gene
Tia1	up	gene
Tia1	up	gene
Ccl27a	up	gene
Omp	up	gene
Emc1	up	gene
Emc1	up	gene
Emc1	up	gene
Emc1	up	gene
Zfp931	up	gene
Gm14326	up	gene
Gm14326	up	gene
Gm14326	up	gene
Gm14434	up	gene
Gm14434	up	gene
Tmem240	up	gene
Apol11b	up	gene
Pcdhgb1	up	gene
Pcdhgb1	up	gene
ENSMUST00000123998.1	up	lnc
ENSMUST00000123998.1	up	lnc
ENSMUST00000123998.1	up	lnc
ENSMUST00000123998.1	up	lnc
ENSMUST00000124298.1	up	lnc
ENSMUST00000128904.1	up	lnc
ENSMUST00000128904.1	up	lnc
ENSMUST00000128904.1	up	lnc
ENSMUST00000139095.1	up	lnc
ENSMUST00000139095.1	up	lnc
ENSMUST00000139095.1	up	lnc
ENSMUST00000139095.1	up	lnc
ENSMUST00000186535.1	up	lnc
ENSMUST00000186535.1	up	lnc
LNC_000007	up	lnc
LNC_000007	up	lnc
LNC_000033	up	lnc
LNC_000033	up	lnc
LNC_000033	up	lnc
LNC_000033	up	lnc
LNC_000033	up	lnc
LNC_000067	up	lnc
LNC_000152	up	lnc
LNC_000152	up	lnc
LNC_000200	up	lnc
LNC_000348	up	lnc
LNC_000429	up	lnc
LNC_000462	up	lnc
LNC_000494	up	lnc
LNC_000494	up	lnc
LNC_000494	up	lnc
LNC_000494	up	lnc
LNC_000494	up	lnc
LNC_000494	up	lnc
LNC_000494	up	lnc
LNC_000782	up	lnc
LNC_000782	up	lnc
LNC_000782	up	lnc
LNC_000782	up	lnc
LNC_000782	up	lnc
LNC_000782	up	lnc
LNC_000782	up	lnc
LNC_000854	up	lnc
LNC_000854	up	lnc
LNC_000854	up	lnc
LNC_000854	up	lnc
LNC_000977	up	lnc
LNC_000977	up	lnc
LNC_001023	up	lnc
LNC_001058	up	lnc
LNC_001058	up	lnc
LNC_001058	up	lnc
LNC_001058	up	lnc
LNC_001058	up	lnc
LNC_001058	up	lnc
LNC_001058	up	lnc
LNC_001062	up	lnc
LNC_001062	up	lnc
LNC_001062	up	lnc
LNC_001062	up	lnc
LNC_001086	up	lnc
LNC_001086	up	lnc
LNC_001173	up	lnc
LNC_001173	up	lnc
LNC_001173	up	lnc
LNC_001173	up	lnc
LNC_001173	up	lnc
LNC_001173	up	lnc
LNC_001173	up	lnc
LNC_001173	up	lnc
LNC_001186	up	lnc
LNC_001186	up	lnc
LNC_001450	up	lnc
LNC_001450	up	lnc
LNC_001450	up	lnc
LNC_001450	up	lnc
LNC_001450	up	lnc
LNC_001451	up	lnc
LNC_001451	up	lnc
LNC_001451	up	lnc
LNC_001451	up	lnc
LNC_001451	up	lnc
LNC_001561	up	lnc
LNC_001561	up	lnc
LNC_001624	up	lnc
LNC_001624	up	lnc
LNC_001773	up	lnc
LNC_001773	up	lnc
LNC_001809	up	lnc
LNC_001809	up	lnc
LNC_001809	up	lnc
LNC_001817	up	lnc
LNC_001817	up	lnc
LNC_001817	up	lnc
LNC_001817	up	lnc
LNC_001817	up	lnc
LNC_001817	up	lnc
LNC_001817	up	lnc
LNC_001817	up	lnc
LNC_001819	up	lnc
LNC_001819	up	lnc
LNC_001819	up	lnc
LNC_001819	up	lnc
LNC_001819	up	lnc
LNC_001819	up	lnc
LNC_001819	up	lnc
LNC_001819	up	lnc
LNC_001819	up	lnc
LNC_001819	up	lnc
LNC_001820	up	lnc
LNC_001820	up	lnc
LNC_001820	up	lnc
LNC_001820	up	lnc
LNC_001820	up	lnc
LNC_001820	up	lnc
LNC_001820	up	lnc
LNC_001820	up	lnc
LNC_001820	up	lnc
LNC_001820	up	lnc
LNC_001820	up	lnc
LNC_001887	up	lnc
LNC_001887	up	lnc
LNC_001887	up	lnc
LNC_001977	up	lnc
LNC_001977	up	lnc
LNC_002078	up	lnc
LNC_002078	up	lnc
LNC_002078	up	lnc
LNC_002078	up	lnc
LNC_002078	up	lnc
LNC_002078	up	lnc
LNC_002078	up	lnc
LNC_002078	up	lnc
LNC_002078	up	lnc
LNC_002115	up	lnc
LNC_002163	up	lnc
LNC_002163	up	lnc
LNC_002163	up	lnc
LNC_002163	up	lnc
LNC_002163	up	lnc
LNC_002163	up	lnc
LNC_002163	up	lnc
LNC_002205	up	lnc
LNC_002205	up	lnc
LNC_002205	up	lnc
LNC_002205	up	lnc
LNC_002205	up	lnc
LNC_002445	up	lnc
LNC_002456	up	lnc
LNC_002456	up	lnc
LNC_002456	up	lnc
LNC_002500	up	lnc
LNC_002638	up	lnc
LNC_002746	up	lnc
LNC_002746	up	lnc
LNC_002746	up	lnc
LNC_002746	up	lnc
LNC_002746	up	lnc
LNC_002746	up	lnc
LNC_002746	up	lnc
LNC_002746	up	lnc
LNC_002746	up	lnc
LNC_002771	up	lnc
LNC_002825	up	lnc
LNC_002956	up	lnc
LNC_003067	up	lnc
LNC_003195	up	lnc
LNC_003197	up	lnc
LNC_003197	up	lnc
LNC_003197	up	lnc
LNC_003197	up	lnc
LNC_003197	up	lnc
LNC_003206	up	lnc
LNC_003206	up	lnc
LNC_003206	up	lnc
LNC_003206	up	lnc
LNC_003206	up	lnc
LNC_003206	up	lnc
LNC_003206	up	lnc
LNC_003458	up	lnc
LNC_003458	up	lnc
LNC_003686	up	lnc
LNC_003732	up	lnc
LNC_003838	up	lnc
LNC_003967	up	lnc
LNC_003967	up	lnc
LNC_003980	up	lnc
LNC_003999	up	lnc
LNC_003999	up	lnc
LNC_003999	up	lnc
LNC_004043	up	lnc
LNC_004057	up	lnc
LNC_004062	up	lnc
LNC_004062	up	lnc
LNC_004062	up	lnc
LNC_004062	up	lnc
LNC_004071	up	lnc
LNC_004100	up	lnc
LNC_004148	up	lnc
LNC_004148	up	lnc
LNC_004176	up	lnc
LNC_004490	up	lnc
LNC_004490	up	lnc
LNC_004514	up	lnc
LNC_004514	up	lnc
LNC_004514	up	lnc
LNC_004514	up	lnc
LNC_004514	up	lnc
LNC_004514	up	lnc
LNC_004554	up	lnc
LNC_004554	up	lnc
LNC_004554	up	lnc
LNC_004554	up	lnc
LNC_004561	up	lnc
LNC_004561	up	lnc
LNC_004628	up	lnc
LNC_004707	up	lnc
LNC_004707	up	lnc
LNC_004707	up	lnc
LNC_004707	up	lnc
LNC_004707	up	lnc
LNC_004707	up	lnc
LNC_004707	up	lnc
LNC_004707	up	lnc
LNC_004707	up	lnc
LNC_004760	up	lnc
LNC_004784	up	lnc
LNC_004784	up	lnc
LNC_004801	up	lnc
LNC_004801	up	lnc
LNC_004801	up	lnc
LNC_005017	up	lnc
LNC_005078	up	lnc
LNC_005078	up	lnc
LNC_005078	up	lnc
LNC_005078	up	lnc
LNC_005400	up	lnc
LNC_005400	up	lnc
LNC_005400	up	lnc
LNC_005400	up	lnc
LNC_005444	up	lnc
LNC_005691	up	lnc
LNC_005818	up	lnc
LNC_005857	up	lnc
LNC_005857	up	lnc
LNC_005904	up	lnc
LNC_006081	up	lnc
LNC_006081	up	lnc
LNC_006081	up	lnc
LNC_006081	up	lnc
LNC_006081	up	lnc
LNC_006081	up	lnc
LNC_006179	up	lnc
LNC_006277	up	lnc
LNC_006277	up	lnc
LNC_006277	up	lnc
LNC_006277	up	lnc
LNC_006277	up	lnc
LNC_006285	up	lnc
LNC_006285	up	lnc
LNC_006313	up	lnc
LNC_006482	up	lnc
LNC_006482	up	lnc
LNC_006482	up	lnc
LNC_006537	up	lnc
LNC_006537	up	lnc
LNC_006588	up	lnc
LNC_006588	up	lnc
LNC_006672	up	lnc
LNC_006672	up	lnc
LNC_006817	up	lnc
LNC_006817	up	lnc
LNC_006817	up	lnc
LNC_006817	up	lnc
LNC_006818	up	lnc
LNC_006818	up	lnc
LNC_006818	up	lnc
LNC_006818	up	lnc
LNC_006818	up	lnc
LNC_006833	up	lnc
LNC_006833	up	lnc
mmu-miR-122-5p	down	miR
mmu-miR-122-5p	down	miR
mmu-miR-122-5p	down	miR
mmu-miR-122-5p	down	miR
mmu-miR-122-5p	down	miR
mmu-miR-122-5p	down	miR
mmu-miR-122-5p	down	miR
mmu-miR-122-5p	down	miR
mmu-miR-122-5p	down	miR
mmu-miR-122-5p	down	miR
mmu-miR-122-5p	down	miR
mmu-miR-122-5p	down	miR
mmu-miR-122-5p	down	miR
mmu-miR-122-5p	down	miR
mmu-miR-122-5p	down	miR
mmu-miR-122-5p	down	miR
mmu-miR-122-5p	down	miR
mmu-miR-122-5p	down	miR
mmu-miR-122-5p	down	miR
mmu-miR-122-5p	down	miR
mmu-miR-122-5p	down	miR
mmu-miR-122-5p	down	miR
mmu-miR-122-5p	down	miR
mmu-miR-122-5p	down	miR
mmu-miR-122-5p	down	miR
mmu-miR-122-5p	down	miR
mmu-miR-122-5p	down	miR
mmu-miR-122-5p	down	miR
mmu-miR-122-5p	down	miR
mmu-miR-122b-3p	down	miR
mmu-miR-122b-3p	down	miR
mmu-miR-122b-3p	down	miR
mmu-miR-122b-3p	down	miR
mmu-miR-122b-3p	down	miR
mmu-miR-122b-3p	down	miR
mmu-miR-122b-3p	down	miR
mmu-miR-122b-3p	down	miR
mmu-miR-122b-3p	down	miR
mmu-miR-122b-3p	down	miR
mmu-miR-122b-3p	down	miR
mmu-miR-122b-3p	down	miR
mmu-miR-122b-3p	down	miR
mmu-miR-122b-3p	down	miR
mmu-miR-122b-3p	down	miR
mmu-miR-122b-3p	down	miR
mmu-miR-122b-3p	down	miR
mmu-miR-122b-3p	down	miR
mmu-miR-122b-3p	down	miR
mmu-miR-122b-3p	down	miR
mmu-miR-122b-3p	down	miR
mmu-miR-122b-3p	down	miR
mmu-miR-122b-3p	down	miR
mmu-miR-122b-3p	down	miR
mmu-miR-122b-3p	down	miR
mmu-miR-122b-3p	down	miR
mmu-miR-122b-3p	down	miR
mmu-miR-122b-3p	down	miR
mmu-miR-122b-3p	down	miR
mmu-miR-122b-3p	down	miR
mmu-miR-128-2-5p	down	miR
mmu-miR-128-2-5p	down	miR
mmu-miR-128-2-5p	down	miR
mmu-miR-128-2-5p	down	miR
mmu-miR-128-2-5p	down	miR
mmu-miR-128-2-5p	down	miR
mmu-miR-128-2-5p	down	miR
mmu-miR-128-2-5p	down	miR
mmu-miR-128-2-5p	down	miR
mmu-miR-128-2-5p	down	miR
mmu-miR-128-2-5p	down	miR
mmu-miR-128-2-5p	down	miR
mmu-miR-128-2-5p	down	miR
mmu-miR-128-2-5p	down	miR
mmu-miR-128-2-5p	down	miR
mmu-miR-128-2-5p	down	miR
mmu-miR-128-2-5p	down	miR
mmu-miR-128-2-5p	down	miR
mmu-miR-128-2-5p	down	miR
mmu-miR-128-2-5p	down	miR
mmu-miR-128-2-5p	down	miR
mmu-miR-128-2-5p	down	miR
mmu-miR-128-2-5p	down	miR
mmu-miR-128-2-5p	down	miR
mmu-miR-135b-5p	down	miR
mmu-miR-135b-5p	down	miR
mmu-miR-135b-5p	down	miR
mmu-miR-135b-5p	down	miR
mmu-miR-135b-5p	down	miR
mmu-miR-135b-5p	down	miR
mmu-miR-135b-5p	down	miR
mmu-miR-135b-5p	down	miR
mmu-miR-135b-5p	down	miR
mmu-miR-135b-5p	down	miR
mmu-miR-135b-5p	down	miR
mmu-miR-135b-5p	down	miR
mmu-miR-135b-5p	down	miR
mmu-miR-135b-5p	down	miR
mmu-miR-135b-5p	down	miR
mmu-miR-135b-5p	down	miR
mmu-miR-135b-5p	down	miR
mmu-miR-135b-5p	down	miR
mmu-miR-135b-5p	down	miR
mmu-miR-135b-5p	down	miR
mmu-miR-135b-5p	down	miR
mmu-miR-135b-5p	down	miR
mmu-miR-135b-5p	down	miR
mmu-miR-135b-5p	down	miR
mmu-miR-135b-5p	down	miR
mmu-miR-135b-5p	down	miR
mmu-miR-135b-5p	down	miR
mmu-miR-135b-5p	down	miR
mmu-miR-135b-5p	down	miR
mmu-miR-135b-5p	down	miR
mmu-miR-138-5p	down	miR
mmu-miR-138-5p	down	miR
mmu-miR-138-5p	down	miR
mmu-miR-138-5p	down	miR
mmu-miR-138-5p	down	miR
mmu-miR-138-5p	down	miR
mmu-miR-138-5p	down	miR
mmu-miR-138-5p	down	miR
mmu-miR-138-5p	down	miR
mmu-miR-138-5p	down	miR
mmu-miR-138-5p	down	miR
mmu-miR-138-5p	down	miR
mmu-miR-138-5p	down	miR
mmu-miR-138-5p	down	miR
mmu-miR-138-5p	down	miR
mmu-miR-138-5p	down	miR
mmu-miR-138-5p	down	miR
mmu-miR-138-5p	down	miR
mmu-miR-138-5p	down	miR
mmu-miR-138-5p	down	miR
mmu-miR-138-5p	down	miR
mmu-miR-138-5p	down	miR
mmu-miR-138-5p	down	miR
mmu-miR-138-5p	down	miR
mmu-miR-138-5p	down	miR
mmu-miR-138-5p	down	miR
mmu-miR-138-5p	down	miR
mmu-miR-138-5p	down	miR
mmu-miR-138-5p	down	miR
mmu-miR-138-5p	down	miR
mmu-miR-190a-5p	down	miR
mmu-miR-190a-5p	down	miR
mmu-miR-190a-5p	down	miR
mmu-miR-190a-5p	down	miR
mmu-miR-190a-5p	down	miR
mmu-miR-190a-5p	down	miR
mmu-miR-190a-5p	down	miR
mmu-miR-190a-5p	down	miR
mmu-miR-190a-5p	down	miR
mmu-miR-190a-5p	down	miR
mmu-miR-190a-5p	down	miR
mmu-miR-190a-5p	down	miR
mmu-miR-190a-5p	down	miR
mmu-miR-190a-5p	down	miR
mmu-miR-190a-5p	down	miR
mmu-miR-190a-5p	down	miR
mmu-miR-190a-5p	down	miR
mmu-miR-190a-5p	down	miR
mmu-miR-190a-5p	down	miR
mmu-miR-192-5p	down	miR
mmu-miR-192-5p	down	miR
mmu-miR-192-5p	down	miR
mmu-miR-192-5p	down	miR
mmu-miR-192-5p	down	miR
mmu-miR-192-5p	down	miR
mmu-miR-192-5p	down	miR
mmu-miR-192-5p	down	miR
mmu-miR-192-5p	down	miR
mmu-miR-192-5p	down	miR
mmu-miR-192-5p	down	miR
mmu-miR-192-5p	down	miR
mmu-miR-192-5p	down	miR
mmu-miR-192-5p	down	miR
mmu-miR-192-5p	down	miR
mmu-miR-192-5p	down	miR
mmu-miR-192-5p	down	miR
mmu-miR-192-5p	down	miR
mmu-miR-192-5p	down	miR
mmu-miR-192-5p	down	miR
mmu-miR-192-5p	down	miR
mmu-miR-192-5p	down	miR
mmu-miR-192-5p	down	miR
mmu-miR-192-5p	down	miR
mmu-miR-192-5p	down	miR
mmu-miR-193b-3p	down	miR
mmu-miR-193b-3p	down	miR
mmu-miR-193b-3p	down	miR
mmu-miR-193b-3p	down	miR
mmu-miR-193b-3p	down	miR
mmu-miR-193b-3p	down	miR
mmu-miR-193b-3p	down	miR
mmu-miR-193b-3p	down	miR
mmu-miR-193b-3p	down	miR
mmu-miR-193b-3p	down	miR
mmu-miR-193b-3p	down	miR
mmu-miR-193b-3p	down	miR
mmu-miR-193b-3p	down	miR
mmu-miR-193b-3p	down	miR
mmu-miR-193b-3p	down	miR
mmu-miR-193b-3p	down	miR
mmu-miR-193b-3p	down	miR
mmu-miR-193b-3p	down	miR
mmu-miR-193b-3p	down	miR
mmu-miR-193b-3p	down	miR
mmu-miR-193b-3p	down	miR
mmu-miR-193b-3p	down	miR
mmu-miR-193b-3p	down	miR
mmu-miR-193b-3p	down	miR
mmu-miR-193b-3p	down	miR
mmu-miR-193b-3p	down	miR
mmu-miR-193b-3p	down	miR
mmu-miR-193b-3p	down	miR
mmu-miR-193b-3p	down	miR
mmu-miR-193b-3p	down	miR
mmu-miR-206-3p	down	miR
mmu-miR-206-3p	down	miR
mmu-miR-206-3p	down	miR
mmu-miR-206-3p	down	miR
mmu-miR-206-3p	down	miR
mmu-miR-206-3p	down	miR
mmu-miR-206-3p	down	miR
mmu-miR-206-3p	down	miR
mmu-miR-206-3p	down	miR
mmu-miR-206-3p	down	miR
mmu-miR-206-3p	down	miR
mmu-miR-206-3p	down	miR
mmu-miR-206-3p	down	miR
mmu-miR-206-3p	down	miR
mmu-miR-206-3p	down	miR
mmu-miR-206-3p	down	miR
mmu-miR-206-3p	down	miR
mmu-miR-206-3p	down	miR
mmu-miR-206-3p	down	miR
mmu-miR-206-3p	down	miR
mmu-miR-206-3p	down	miR
mmu-miR-206-3p	down	miR
mmu-miR-206-3p	down	miR
mmu-miR-206-3p	down	miR
mmu-miR-206-3p	down	miR
mmu-miR-206-3p	down	miR
mmu-miR-206-3p	down	miR
mmu-miR-206-3p	down	miR
mmu-miR-206-3p	down	miR
mmu-miR-206-3p	down	miR
mmu-miR-3068-3p	down	miR
mmu-miR-3068-3p	down	miR
mmu-miR-3068-3p	down	miR
mmu-miR-3068-3p	down	miR
mmu-miR-3068-3p	down	miR
mmu-miR-3068-3p	down	miR
mmu-miR-3068-3p	down	miR
mmu-miR-3068-3p	down	miR
mmu-miR-3068-3p	down	miR
mmu-miR-3068-3p	down	miR
mmu-miR-3068-3p	down	miR
mmu-miR-3068-3p	down	miR
mmu-miR-3068-3p	down	miR
mmu-miR-3068-3p	down	miR
mmu-miR-3068-3p	down	miR
mmu-miR-3068-3p	down	miR
mmu-miR-3068-3p	down	miR
mmu-miR-3068-3p	down	miR
mmu-miR-3068-3p	down	miR
mmu-miR-3068-3p	down	miR
mmu-miR-3068-3p	down	miR
mmu-miR-3068-3p	down	miR
mmu-miR-3068-3p	down	miR
mmu-miR-3068-3p	down	miR
mmu-miR-3068-3p	down	miR
mmu-miR-3097-3p	down	miR
mmu-miR-3097-3p	down	miR
mmu-miR-3097-3p	down	miR
mmu-miR-3097-3p	down	miR
mmu-miR-3097-3p	down	miR
mmu-miR-3097-3p	down	miR
mmu-miR-3097-3p	down	miR
mmu-miR-3097-3p	down	miR
mmu-miR-3097-3p	down	miR
mmu-miR-3097-3p	down	miR
mmu-miR-3097-3p	down	miR
mmu-miR-3097-3p	down	miR
mmu-miR-3097-3p	down	miR
mmu-miR-3097-3p	down	miR
mmu-miR-3097-3p	down	miR
mmu-miR-3097-3p	down	miR
mmu-miR-3097-3p	down	miR
mmu-miR-3097-3p	down	miR
mmu-miR-3097-3p	down	miR
mmu-miR-3097-3p	down	miR
mmu-miR-3097-3p	down	miR
mmu-miR-3097-3p	down	miR
mmu-miR-3097-3p	down	miR
mmu-miR-3097-3p	down	miR
mmu-miR-3097-3p	down	miR
mmu-miR-3097-3p	down	miR
mmu-miR-3097-3p	down	miR
mmu-miR-31-5p	down	miR
mmu-miR-31-5p	down	miR
mmu-miR-31-5p	down	miR
mmu-miR-31-5p	down	miR
mmu-miR-31-5p	down	miR
mmu-miR-31-5p	down	miR
mmu-miR-31-5p	down	miR
mmu-miR-31-5p	down	miR
mmu-miR-31-5p	down	miR
mmu-miR-31-5p	down	miR
mmu-miR-31-5p	down	miR
mmu-miR-31-5p	down	miR
mmu-miR-31-5p	down	miR
mmu-miR-31-5p	down	miR
mmu-miR-31-5p	down	miR
mmu-miR-31-5p	down	miR
mmu-miR-31-5p	down	miR
mmu-miR-31-5p	down	miR
mmu-miR-31-5p	down	miR
mmu-miR-31-5p	down	miR
mmu-miR-31-5p	down	miR
mmu-miR-31-5p	down	miR
mmu-miR-31-5p	down	miR
mmu-miR-31-5p	down	miR
mmu-miR-31-5p	down	miR
mmu-miR-31-5p	down	miR
mmu-miR-31-5p	down	miR
mmu-miR-31-5p	down	miR
mmu-miR-31-5p	down	miR
mmu-miR-31-5p	down	miR
mmu-miR-365-3p	down	miR
mmu-miR-365-3p	down	miR
mmu-miR-365-3p	down	miR
mmu-miR-365-3p	down	miR
mmu-miR-365-3p	down	miR
mmu-miR-365-3p	down	miR
mmu-miR-365-3p	down	miR
mmu-miR-365-3p	down	miR
mmu-miR-365-3p	down	miR
mmu-miR-365-3p	down	miR
mmu-miR-365-3p	down	miR
mmu-miR-365-3p	down	miR
mmu-miR-365-3p	down	miR
mmu-miR-365-3p	down	miR
mmu-miR-365-3p	down	miR
mmu-miR-365-3p	down	miR
mmu-miR-365-3p	down	miR
mmu-miR-365-3p	down	miR
mmu-miR-365-3p	down	miR
mmu-miR-365-3p	down	miR
mmu-miR-365-3p	down	miR
mmu-miR-365-3p	down	miR
mmu-miR-365-3p	down	miR
mmu-miR-365-3p	down	miR
mmu-miR-365-3p	down	miR
mmu-miR-365-3p	down	miR
mmu-miR-365-3p	down	miR
mmu-miR-365-3p	down	miR
mmu-miR-365-3p	down	miR
mmu-miR-365-3p	down	miR
mmu-miR-449a-5p	down	miR
mmu-miR-449a-5p	down	miR
mmu-miR-449a-5p	down	miR
mmu-miR-449a-5p	down	miR
mmu-miR-449a-5p	down	miR
mmu-miR-449a-5p	down	miR
mmu-miR-449a-5p	down	miR
mmu-miR-449a-5p	down	miR
mmu-miR-449a-5p	down	miR
mmu-miR-449a-5p	down	miR
mmu-miR-449a-5p	down	miR
mmu-miR-449a-5p	down	miR
mmu-miR-449a-5p	down	miR
mmu-miR-449a-5p	down	miR
mmu-miR-449a-5p	down	miR
mmu-miR-449a-5p	down	miR
mmu-miR-449a-5p	down	miR
mmu-miR-449a-5p	down	miR
mmu-miR-449a-5p	down	miR
mmu-miR-449a-5p	down	miR
mmu-miR-449a-5p	down	miR
mmu-miR-449a-5p	down	miR
mmu-miR-449a-5p	down	miR
mmu-miR-449a-5p	down	miR
mmu-miR-449a-5p	down	miR
mmu-miR-449a-5p	down	miR
mmu-miR-449a-5p	down	miR
mmu-miR-449a-5p	down	miR
mmu-miR-449a-5p	down	miR
mmu-miR-449a-5p	down	miR
mmu-miR-466i-5p	down	miR
mmu-miR-466i-5p	down	miR
mmu-miR-466i-5p	down	miR
mmu-miR-466i-5p	down	miR
mmu-miR-466i-5p	down	miR
mmu-miR-466i-5p	down	miR
mmu-miR-466i-5p	down	miR
mmu-miR-466i-5p	down	miR
mmu-miR-466i-5p	down	miR
mmu-miR-466i-5p	down	miR
mmu-miR-466i-5p	down	miR
mmu-miR-466i-5p	down	miR
mmu-miR-466i-5p	down	miR
mmu-miR-466i-5p	down	miR
mmu-miR-466i-5p	down	miR
mmu-miR-466i-5p	down	miR
mmu-miR-466i-5p	down	miR
mmu-miR-466i-5p	down	miR
mmu-miR-466i-5p	down	miR
mmu-miR-466i-5p	down	miR
mmu-miR-466i-5p	down	miR
mmu-miR-466i-5p	down	miR
mmu-miR-466i-5p	down	miR
mmu-miR-466i-5p	down	miR
mmu-miR-466i-5p	down	miR
mmu-miR-466i-5p	down	miR
mmu-miR-466i-5p	down	miR
mmu-miR-466i-5p	down	miR
mmu-miR-466i-5p	down	miR
mmu-miR-466i-5p	down	miR
mmu-miR-467a-3p	down	miR
mmu-miR-467a-3p	down	miR
mmu-miR-467a-3p	down	miR
mmu-miR-467a-3p	down	miR
mmu-miR-467a-3p	down	miR
mmu-miR-467a-3p	down	miR
mmu-miR-467a-3p	down	miR
mmu-miR-467a-3p	down	miR
mmu-miR-467a-3p	down	miR
mmu-miR-467a-3p	down	miR
mmu-miR-467a-3p	down	miR
mmu-miR-467a-3p	down	miR
mmu-miR-467a-3p	down	miR
mmu-miR-467a-3p	down	miR
mmu-miR-467a-3p	down	miR
mmu-miR-467a-3p	down	miR
mmu-miR-467a-3p	down	miR
mmu-miR-467a-3p	down	miR
mmu-miR-467a-3p	down	miR
mmu-miR-467a-3p	down	miR
mmu-miR-467a-3p	down	miR
mmu-miR-467a-3p	down	miR
mmu-miR-467a-3p	down	miR
mmu-miR-467a-3p	down	miR
mmu-miR-467a-3p	down	miR
mmu-miR-467a-3p	down	miR
mmu-miR-467a-3p	down	miR
mmu-miR-467a-3p	down	miR
mmu-miR-467a-3p	down	miR
mmu-miR-467a-3p	down	miR
mmu-miR-467d-3p	down	miR
mmu-miR-467d-3p	down	miR
mmu-miR-467d-3p	down	miR
mmu-miR-467d-3p	down	miR
mmu-miR-467d-3p	down	miR
mmu-miR-467d-3p	down	miR
mmu-miR-467d-3p	down	miR
mmu-miR-467d-3p	down	miR
mmu-miR-467d-3p	down	miR
mmu-miR-467d-3p	down	miR
mmu-miR-467d-3p	down	miR
mmu-miR-467d-3p	down	miR
mmu-miR-467d-3p	down	miR
mmu-miR-467d-3p	down	miR
mmu-miR-467d-3p	down	miR
mmu-miR-467d-3p	down	miR
mmu-miR-467d-3p	down	miR
mmu-miR-467d-3p	down	miR
mmu-miR-467d-3p	down	miR
mmu-miR-467d-3p	down	miR
mmu-miR-467d-3p	down	miR
mmu-miR-540-3p	down	miR
mmu-miR-540-3p	down	miR
mmu-miR-540-3p	down	miR
mmu-miR-540-3p	down	miR
mmu-miR-540-3p	down	miR
mmu-miR-540-3p	down	miR
mmu-miR-540-3p	down	miR
mmu-miR-540-3p	down	miR
mmu-miR-540-3p	down	miR
mmu-miR-540-3p	down	miR
mmu-miR-540-3p	down	miR
mmu-miR-540-3p	down	miR
mmu-miR-540-3p	down	miR
mmu-miR-540-3p	down	miR
mmu-miR-540-3p	down	miR
mmu-miR-540-3p	down	miR
mmu-miR-540-3p	down	miR
mmu-miR-540-3p	down	miR
mmu-miR-540-3p	down	miR
mmu-miR-540-3p	down	miR
mmu-miR-540-3p	down	miR
mmu-miR-540-3p	down	miR
mmu-miR-540-3p	down	miR
mmu-miR-540-3p	down	miR
mmu-miR-540-3p	down	miR
mmu-miR-540-3p	down	miR
mmu-miR-540-3p	down	miR
mmu-miR-540-3p	down	miR
mmu-miR-540-3p	down	miR
mmu-miR-540-3p	down	miR
mmu-miR-669f-3p	down	miR
mmu-miR-669f-3p	down	miR
mmu-miR-669f-3p	down	miR
mmu-miR-669f-3p	down	miR
mmu-miR-669f-3p	down	miR
mmu-miR-669f-3p	down	miR
mmu-miR-669f-3p	down	miR
mmu-miR-669f-3p	down	miR
mmu-miR-669f-3p	down	miR
mmu-miR-669f-3p	down	miR
mmu-miR-669f-3p	down	miR
mmu-miR-669f-3p	down	miR
mmu-miR-669f-3p	down	miR
mmu-miR-669f-3p	down	miR
mmu-miR-669f-3p	down	miR
mmu-miR-669f-3p	down	miR
mmu-miR-669f-3p	down	miR
mmu-miR-669f-3p	down	miR
mmu-miR-669f-3p	down	miR
mmu-miR-669f-3p	down	miR
mmu-miR-669f-3p	down	miR
mmu-miR-669f-3p	down	miR
mmu-miR-669f-3p	down	miR
mmu-miR-669f-3p	down	miR
mmu-miR-669f-3p	down	miR
mmu-miR-669f-3p	down	miR
mmu-miR-669f-3p	down	miR
mmu-miR-669f-3p	down	miR
mmu-miR-6933-5p	down	miR
mmu-miR-6933-5p	down	miR
mmu-miR-6933-5p	down	miR
mmu-miR-6933-5p	down	miR
mmu-miR-6933-5p	down	miR
mmu-miR-6933-5p	down	miR
mmu-miR-6933-5p	down	miR
mmu-miR-6933-5p	down	miR
mmu-miR-6933-5p	down	miR
mmu-miR-6933-5p	down	miR
mmu-miR-6933-5p	down	miR
mmu-miR-6933-5p	down	miR
mmu-miR-6933-5p	down	miR
mmu-miR-6933-5p	down	miR
mmu-miR-6933-5p	down	miR
mmu-miR-6933-5p	down	miR
mmu-miR-6933-5p	down	miR
mmu-miR-6933-5p	down	miR
mmu-miR-6933-5p	down	miR
mmu-miR-6933-5p	down	miR
mmu-miR-6933-5p	down	miR
mmu-miR-6933-5p	down	miR
mmu-miR-6933-5p	down	miR
mmu-miR-6933-5p	down	miR
mmu-miR-6933-5p	down	miR
mmu-miR-6933-5p	down	miR
mmu-miR-6933-5p	down	miR
mmu-miR-7688-5p	down	miR
mmu-miR-7688-5p	down	miR
mmu-miR-7688-5p	down	miR
mmu-miR-7688-5p	down	miR
mmu-miR-7688-5p	down	miR
mmu-miR-7688-5p	down	miR
mmu-miR-7688-5p	down	miR
mmu-miR-7688-5p	down	miR
mmu-miR-7688-5p	down	miR
mmu-miR-7688-5p	down	miR
mmu-miR-7688-5p	down	miR
mmu-miR-7688-5p	down	miR
mmu-miR-7688-5p	down	miR
mmu-miR-7688-5p	down	miR
mmu-miR-7688-5p	down	miR
mmu-miR-7688-5p	down	miR
mmu-miR-7688-5p	down	miR
mmu-miR-7688-5p	down	miR
mmu-miR-7688-5p	down	miR
mmu-miR-7688-5p	down	miR
mmu-miR-7688-5p	down	miR
mmu-miR-7688-5p	down	miR
mmu-miR-7688-5p	down	miR
mmu-miR-7688-5p	down	miR
mmu-miR-7688-5p	down	miR
mmu-miR-7688-5p	down	miR
mmu-miR-7688-5p	down	miR
mmu-miR-7688-5p	down	miR
mmu-miR-7688-5p	down	miR
mmu-miR-7688-5p	down	miR
novel_423	down	miR
novel_423	down	miR
novel_423	down	miR
novel_423	down	miR
novel_423	down	miR
novel_423	down	miR
novel_423	down	miR
novel_423	down	miR
novel_423	down	miR
novel_423	down	miR
novel_423	down	miR
novel_423	down	miR
novel_423	down	miR
novel_423	down	miR
novel_423	down	miR
novel_423	down	miR
novel_423	down	miR
novel_423	down	miR
novel_423	down	miR
novel_423	down	miR
novel_423	down	miR
novel_423	down	miR
novel_423	down	miR
novel_423	down	miR
novel_423	down	miR
novel_423	down	miR
