# Supplementary material for: Identifying lncRNA–miRNA–mRNA networks to investigate Alzheimer’s disease pathogenesis and therapy strategy
Source: Aging (Albany NY). 2020 Feb 7;12(3):2897–920. doi: 10.18632/aging.102785 (PMC7041741; doi:10.18632/aging.102785)
Supplement: Supplementary Table 8 [file aging-12-102785-s006..xlsx]

## Sheet: node
Supplementary Table S8. Nodes interactions in the 6yes9no group
mmu-miR-9b-5p	Fmr1
mmu-miR-744-5p	Trmt1
mmu-miR-219b-5p	Tead3
mmu-miR-1983	Impdh1
mmu-miR-219b-5p	Zfp287
mmu-miR-744-5p	Kctd20
mmu-miR-219a-2-3p	Adssl1
mmu-miR-881-3p	Adssl1
mmu-miR-339-3p	Ppdpf
mmu-miR-22-5p	Kif3a
mmu-miR-744-5p	Poc1b
mmu-miR-9b-5p	Sgk1
mmu-miR-9b-5p	Slc29a3
mmu-miR-219b-5p	Cnot2
mmu-miR-1983	Slc36a1
mmu-miR-450b-5p	Rad50
mmu-miR-744-5p	Cdkl3
mmu-miR-744-5p	Pecam1
mmu-miR-350-5p	Acox1
mmu-miR-744-5p	Spag9
mmu-miR-219b-5p	Ccdc43
mmu-miR-9b-5p	Nedd9
mmu-miR-22-5p	Polk
mmu-miR-9b-5p	Hacl1
mmu-miR-450b-5p	Hdac7
mmu-miR-744-5p	Ube2v2
mmu-miR-350-5p	Mina
mmu-miR-219b-5p	Lrch3
mmu-miR-1983	St6gal1
mmu-miR-350-5p	Gtf2ird1
mmu-miR-9b-5p	Mpc1
mmu-miR-339-3p	Svil
mmu-miR-350-5p	Tcf7l2
mmu-miR-350-5p	Cant1
mmu-miR-219a-2-3p	Plk4
mmu-miR-881-3p	Plk4
mmu-miR-219a-2-3p	Sox17
mmu-miR-881-3p	Sox17
mmu-miR-3058-5p	Sema4c
mmu-miR-22-5p	Plcd4
mmu-miR-339-3p	Plcd4
mmu-miR-22-5p	Slc11a1
mmu-miR-450b-5p	Dnajb2
mmu-miR-3058-5p	Rab17
mmu-miR-450b-5p	Nek6
mmu-miR-219b-5p	Camsap1
mmu-miR-339-3p	Fbxo3
mmu-miR-219a-2-3p	Fbn1
mmu-miR-22-5p	4930402H24Rik
mmu-miR-339-3p	4930402H24Rik
mmu-miR-450b-5p	Tmem230
mmu-miR-3058-5p	Atp9a
mmu-miR-450b-5p	Zbtb7b
mmu-miR-219a-2-3p	Pex11b
mmu-miR-881-3p	Pex11b
mmu-miR-9b-5p	Nr4a3
mmu-miR-1983	Nasp
mmu-miR-22-5p	Capzb
mmu-miR-9b-5p	Azin2
mmu-miR-9b-5p	Eya3
mmu-miR-219a-2-3p	Acot7
mmu-miR-881-3p	Acot7
mmu-miR-22-5p	Gtf3c2
mmu-miR-339-3p	Gtf3c2
mmu-miR-22-5p	Agbl5
mmu-miR-1983	Ep400
mmu-miR-339-3p	Cabp1
mmu-miR-450b-5p	Ahcyl2
mmu-miR-881-3p	Slc41a3
mmu-miR-450b-5p	Ret
mmu-miR-219b-5p	Grin2b
mmu-miR-450b-5p	Gas2
mmu-miR-22-5p	Fam98c
mmu-miR-339-3p	Fam98c
mmu-miR-1983	Slco2b1
mmu-miR-881-3p	Myo7a
mmu-miR-219b-5p	Tead2
mmu-miR-450b-5p	St5
mmu-miR-450b-5p	Dock11
mmu-miR-1983	Tbx22
mmu-miR-219b-5p	Lrch2
mmu-miR-219a-2-3p	Arhgap6
mmu-miR-881-3p	Arhgap6
mmu-miR-744-5p	Irak1
mmu-miR-219b-5p	Fgfr1
mmu-miR-744-5p	Sorbs2
mmu-miR-3058-5p	Tlr3
mmu-miR-219a-2-3p	Usp10
mmu-miR-881-3p	Usp10
mmu-miR-339-3p	Ints10
mmu-miR-744-5p	Tmprss4
mmu-miR-450b-5p	Topbp1
mmu-miR-3058-5p	Ank2
mmu-miR-219a-2-3p	Camkv
mmu-miR-881-3p	Camkv
mmu-miR-3058-5p	Gm28042
mmu-miR-350-5p	Map9
mmu-miR-219b-5p	Mga
mmu-miR-1983	Zfp446
mmu-miR-3058-5p	Setd5
mmu-miR-219a-2-3p	Zfp57
mmu-miR-3058-5p	5031439G07Rik
mmu-miR-450b-5p	Stag3
mmu-miR-22-5p	Rcor3
mmu-miR-339-3p	Rcor3
mmu-miR-450b-5p	Thoc2
mmu-miR-9b-5p	Dzip1l
mmu-miR-219a-2-3p	Vopp1
mmu-miR-881-3p	Vopp1
mmu-miR-350-5p	Jmjd1c
mmu-miR-744-5p	Rcor1
mmu-miR-3058-5p	Pigk
mmu-miR-1983	Runx2
mmu-miR-219b-5p	Ufl1
mmu-miR-450b-5p	Gemin8
mmu-miR-9b-5p	Dlk1
mmu-miR-9b-5p	Rpl21
mmu-miR-744-5p	Cacna2d4
mmu-miR-219a-2-3p	Ppp2r2d
mmu-miR-881-3p	Ppp2r2d
mmu-miR-3058-5p	Abhd14a
mmu-miR-744-5p	Dok7
mmu-miR-744-5p	Onecut2
mmu-miR-350-5p	Mcmdc2
mmu-miR-219b-5p	Trappc9
mmu-miR-339-3p	Phldb1
mmu-miR-22-5p	Il23r
mmu-miR-350-5p	Dcun1d4
mmu-miR-350-5p	Mpp3
mmu-miR-350-5p	5430435G22Rik
mmu-miR-3058-5p	Tln2
mmu-miR-1983	Rnf157
mmu-miR-22-5p	Tcf4
mmu-miR-339-3p	Tcf4
mmu-miR-219a-2-3p	H2-T24
mmu-miR-881-3p	H2-T24
mmu-miR-9b-5p	Dnajc8
mmu-miR-3058-5p	Kcnmb4
mmu-miR-22-5p	Lmntd1
mmu-miR-339-3p	Lmntd1
mmu-miR-22-5p	Tmem150a
mmu-miR-339-3p	Tmem150a
mmu-miR-1983	Gsk3a
mmu-miR-1983	Camk2b
mmu-miR-9b-5p	Palld
mmu-miR-219b-5p	Frem1
mmu-miR-350-5p	Eda
mmu-miR-1983	Lsamp
mmu-miR-9b-5p	H2-K1
mmu-miR-22-5p	Fiz1
mmu-miR-339-3p	Fiz1
mmu-miR-744-5p	Dot1l
mmu-miR-350-5p	Scfd2
mmu-miR-1983	Macrod2
mmu-miR-3058-5p	Zfp467
mmu-miR-219b-5p	Hist1h2bq
mmu-miR-3058-5p	Duxbl3
mmu-miR-350-5p	Scn9a
mmu-miR-219a-2-3p	Gm16503
mmu-miR-881-3p	Gm16503
mmu-miR-219a-2-3p	Eif5a
mmu-miR-881-3p	Eif5a
mmu-miR-350-5p	Lemd1
mmu-miR-1983	1700015F17Rik
mmu-miR-3058-5p	Fam220a
mmu-miR-881-3p	ENSMUST00000145191.1
mmu-miR-1983	ENSMUST00000151069.1
mmu-miR-219a-2-3p	ENSMUST00000170849.7
mmu-miR-450b-5p	ENSMUST00000182259.7
mmu-miR-3058-5p	ENSMUST00000182580.7
mmu-miR-22-5p	ENSMUST00000194628.1
mmu-miR-339-3p	LNC_000034
mmu-miR-881-3p	LNC_000034
mmu-miR-1983	LNC_000053
mmu-miR-350-5p	LNC_000130
mmu-miR-219b-5p	LNC_000169
mmu-miR-22-5p	LNC_000169
mmu-miR-22-5p	LNC_000245
mmu-miR-339-3p	LNC_000245
mmu-miR-22-5p	LNC_000420
mmu-miR-450b-5p	LNC_000520
mmu-miR-22-5p	LNC_000816
mmu-miR-1983	LNC_001012
mmu-miR-22-5p	LNC_001012
mmu-miR-339-3p	LNC_001222
mmu-miR-3058-5p	LNC_001754
mmu-miR-450b-5p	LNC_001838
mmu-miR-744-5p	LNC_001838
mmu-miR-881-3p	LNC_001838
mmu-miR-3058-5p	LNC_001930
mmu-miR-219a-2-3p	LNC_001994
mmu-miR-22-5p	LNC_001994
mmu-miR-3058-5p	LNC_001994
mmu-miR-450b-5p	LNC_001994
mmu-miR-744-5p	LNC_001994
mmu-miR-881-3p	LNC_001994
mmu-miR-350-5p	LNC_002167
mmu-miR-219a-2-3p	LNC_002208
mmu-miR-219b-5p	LNC_002208
mmu-miR-339-3p	LNC_002217
mmu-miR-450b-5p	LNC_002217
mmu-miR-744-5p	LNC_002217
mmu-miR-881-3p	LNC_002217
mmu-miR-1983	LNC_002260
mmu-miR-881-3p	LNC_002260
mmu-miR-1983	LNC_002477
mmu-miR-219b-5p	LNC_002477
mmu-miR-22-5p	LNC_002477
mmu-miR-3058-5p	LNC_002477
mmu-miR-339-3p	LNC_002477
mmu-miR-350-5p	LNC_002477
mmu-miR-450b-5p	LNC_002477
mmu-miR-744-5p	LNC_002477
mmu-miR-881-3p	LNC_002477
mmu-miR-219b-5p	LNC_002741
mmu-miR-1983	LNC_002748
mmu-miR-3058-5p	LNC_002827
mmu-miR-881-3p	LNC_002827
mmu-miR-22-5p	LNC_002930
mmu-miR-744-5p	LNC_002930
mmu-miR-1983	LNC_002933
mmu-miR-350-5p	LNC_002933
mmu-miR-450b-5p	LNC_002933
mmu-miR-744-5p	LNC_002933
mmu-miR-1983	LNC_002934
mmu-miR-3058-5p	LNC_002934
mmu-miR-350-5p	LNC_002934
mmu-miR-450b-5p	LNC_002934
mmu-miR-744-5p	LNC_002934
mmu-miR-881-3p	LNC_002971
mmu-miR-450b-5p	LNC_002992
mmu-miR-3058-5p	LNC_003168
mmu-miR-350-5p	LNC_003168
mmu-miR-1983	LNC_003216
mmu-miR-22-5p	LNC_003401
mmu-miR-3058-5p	LNC_003401
mmu-miR-350-5p	LNC_003460
mmu-miR-3058-5p	LNC_003495
mmu-miR-350-5p	LNC_003495
mmu-miR-3058-5p	LNC_003615
mmu-miR-9b-5p	LNC_003754
mmu-miR-350-5p	LNC_004175
mmu-miR-1983	LNC_004418
mmu-miR-3058-5p	LNC_004418
mmu-miR-219b-5p	LNC_004579
mmu-miR-219a-2-3p	LNC_004597
mmu-miR-1983	LNC_005109
mmu-miR-219b-5p	LNC_005109
mmu-miR-339-3p	LNC_005109
mmu-miR-744-5p	LNC_005109
mmu-miR-3058-5p	LNC_005402
mmu-miR-339-3p	LNC_005402
mmu-miR-350-5p	LNC_005402
mmu-miR-3058-5p	LNC_005416
mmu-miR-350-5p	LNC_005416
mmu-miR-1983	LNC_005587
mmu-miR-219b-5p	LNC_005587
mmu-miR-339-3p	LNC_005587
mmu-miR-350-5p	LNC_005587
mmu-miR-450b-5p	LNC_005587
mmu-miR-881-3p	LNC_005587
mmu-miR-3058-5p	LNC_006082
mmu-miR-450b-5p	LNC_006082
mmu-miR-881-3p	LNC_006082
mmu-miR-1983	LNC_006234
mmu-miR-219a-2-3p	LNC_006234
mmu-miR-22-5p	LNC_006234
mmu-miR-339-3p	LNC_006234
mmu-miR-450b-5p	LNC_006234
mmu-miR-350-5p	LNC_006292
mmu-miR-744-5p	LNC_006395
mmu-miR-1983	LNC_006684
mmu-miR-350-5p	LNC_006684
mmu-miR-450b-5p	LNC_006684
mmu-miR-881-3p	LNC_006684
mmu-miR-1983	LNC_006821
mmu-miR-219b-5p	LNC_006821
mmu-miR-22-5p	LNC_006821
mmu-miR-350-5p	LNC_006821

## Sheet: type
Supplemental Table S8. Nodes types in the 6yes9no group
Fmr1	down	gene
Trmt1	down	gene
Tead3	down	gene
Impdh1	down	gene
Zfp287	down	gene
Kctd20	down	gene
Adssl1	down	gene
Adssl1	down	gene
Ppdpf	down	gene
Kif3a	down	gene
Poc1b	down	gene
Sgk1	down	gene
Slc29a3	down	gene
Cnot2	down	gene
Slc36a1	down	gene
Rad50	down	gene
Cdkl3	down	gene
Pecam1	down	gene
Acox1	down	gene
Spag9	down	gene
Ccdc43	down	gene
Nedd9	down	gene
Polk	down	gene
Hacl1	down	gene
Hdac7	down	gene
Ube2v2	down	gene
Mina	down	gene
Lrch3	down	gene
St6gal1	down	gene
Gtf2ird1	down	gene
Mpc1	down	gene
Svil	down	gene
Tcf7l2	down	gene
Cant1	down	gene
Plk4	down	gene
Plk4	down	gene
Sox17	down	gene
Sox17	down	gene
Sema4c	down	gene
Plcd4	down	gene
Plcd4	down	gene
Slc11a1	down	gene
Dnajb2	down	gene
Rab17	down	gene
Nek6	down	gene
Camsap1	down	gene
Fbxo3	down	gene
Fbn1	down	gene
4930402H24Rik	down	gene
4930402H24Rik	down	gene
Tmem230	down	gene
Atp9a	down	gene
Zbtb7b	down	gene
Pex11b	down	gene
Pex11b	down	gene
Nr4a3	down	gene
Nasp	down	gene
Capzb	down	gene
Azin2	down	gene
Eya3	down	gene
Acot7	down	gene
Acot7	down	gene
Gtf3c2	down	gene
Gtf3c2	down	gene
Agbl5	down	gene
Ep400	down	gene
Cabp1	down	gene
Ahcyl2	down	gene
Slc41a3	down	gene
Ret	down	gene
Grin2b	down	gene
Gas2	down	gene
Fam98c	down	gene
Fam98c	down	gene
Slco2b1	down	gene
Myo7a	down	gene
Tead2	down	gene
St5	down	gene
Dock11	down	gene
Tbx22	down	gene
Lrch2	down	gene
Arhgap6	down	gene
Arhgap6	down	gene
Irak1	down	gene
Fgfr1	down	gene
Sorbs2	down	gene
Tlr3	down	gene
Usp10	down	gene
Usp10	down	gene
Ints10	down	gene
Tmprss4	down	gene
Topbp1	down	gene
Ank2	down	gene
Camkv	down	gene
Camkv	down	gene
Gm28042	down	gene
Map9	down	gene
Mga	down	gene
Zfp446	down	gene
Setd5	down	gene
Zfp57	down	gene
5031439G07Rik	down	gene
Stag3	down	gene
Rcor3	down	gene
Rcor3	down	gene
Thoc2	down	gene
Dzip1l	down	gene
Vopp1	down	gene
Vopp1	down	gene
Jmjd1c	down	gene
Rcor1	down	gene
Pigk	down	gene
Runx2	down	gene
Ufl1	down	gene
Gemin8	down	gene
Dlk1	down	gene
Rpl21	down	gene
Cacna2d4	down	gene
Ppp2r2d	down	gene
Ppp2r2d	down	gene
Abhd14a	down	gene
Dok7	down	gene
Onecut2	down	gene
Mcmdc2	down	gene
Trappc9	down	gene
Phldb1	down	gene
Il23r	down	gene
Dcun1d4	down	gene
Mpp3	down	gene
5430435G22Rik	down	gene
Tln2	down	gene
Rnf157	down	gene
Tcf4	down	gene
Tcf4	down	gene
H2-T24	down	gene
H2-T24	down	gene
Dnajc8	down	gene
Kcnmb4	down	gene
Lmntd1	down	gene
Lmntd1	down	gene
Tmem150a	down	gene
Tmem150a	down	gene
Gsk3a	down	gene
Camk2b	down	gene
Palld	down	gene
Frem1	down	gene
Eda	down	gene
Lsamp	down	gene
H2-K1	down	gene
Fiz1	down	gene
Fiz1	down	gene
Dot1l	down	gene
Scfd2	down	gene
Macrod2	down	gene
Zfp467	down	gene
Hist1h2bq	down	gene
Duxbl3	down	gene
Scn9a	down	gene
Gm16503	down	gene
Gm16503	down	gene
Eif5a	down	gene
Eif5a	down	gene
Lemd1	down	gene
1700015F17Rik	down	gene
Fam220a	down	gene
ENSMUST00000145191.1	down	lnc
ENSMUST00000151069.1	down	lnc
ENSMUST00000170849.7	down	lnc
ENSMUST00000182259.7	down	lnc
ENSMUST00000182580.7	down	lnc
ENSMUST00000194628.1	down	lnc
LNC_000034	down	lnc
LNC_000034	down	lnc
LNC_000053	down	lnc
LNC_000130	down	lnc
LNC_000169	down	lnc
LNC_000169	down	lnc
LNC_000245	down	lnc
LNC_000245	down	lnc
LNC_000420	down	lnc
LNC_000520	down	lnc
LNC_000816	down	lnc
LNC_001012	down	lnc
LNC_001012	down	lnc
LNC_001222	down	lnc
LNC_001754	down	lnc
LNC_001838	down	lnc
LNC_001838	down	lnc
LNC_001838	down	lnc
LNC_001930	down	lnc
LNC_001994	down	lnc
LNC_001994	down	lnc
LNC_001994	down	lnc
LNC_001994	down	lnc
LNC_001994	down	lnc
LNC_001994	down	lnc
LNC_002167	down	lnc
LNC_002208	down	lnc
LNC_002208	down	lnc
LNC_002217	down	lnc
LNC_002217	down	lnc
LNC_002217	down	lnc
LNC_002217	down	lnc
LNC_002260	down	lnc
LNC_002260	down	lnc
LNC_002477	down	lnc
LNC_002477	down	lnc
LNC_002477	down	lnc
LNC_002477	down	lnc
LNC_002477	down	lnc
LNC_002477	down	lnc
LNC_002477	down	lnc
LNC_002477	down	lnc
LNC_002477	down	lnc
LNC_002741	down	lnc
LNC_002748	down	lnc
LNC_002827	down	lnc
LNC_002827	down	lnc
LNC_002930	down	lnc
LNC_002930	down	lnc
LNC_002933	down	lnc
LNC_002933	down	lnc
LNC_002933	down	lnc
LNC_002933	down	lnc
LNC_002934	down	lnc
LNC_002934	down	lnc
LNC_002934	down	lnc
LNC_002934	down	lnc
LNC_002934	down	lnc
LNC_002971	down	lnc
LNC_002992	down	lnc
LNC_003168	down	lnc
LNC_003168	down	lnc
LNC_003216	down	lnc
LNC_003401	down	lnc
LNC_003401	down	lnc
LNC_003460	down	lnc
LNC_003495	down	lnc
LNC_003495	down	lnc
LNC_003615	down	lnc
LNC_003754	down	lnc
LNC_004175	down	lnc
LNC_004418	down	lnc
LNC_004418	down	lnc
LNC_004579	down	lnc
LNC_004597	down	lnc
LNC_005109	down	lnc
LNC_005109	down	lnc
LNC_005109	down	lnc
LNC_005109	down	lnc
LNC_005402	down	lnc
LNC_005402	down	lnc
LNC_005402	down	lnc
LNC_005416	down	lnc
LNC_005416	down	lnc
LNC_005587	down	lnc
LNC_005587	down	lnc
LNC_005587	down	lnc
LNC_005587	down	lnc
LNC_005587	down	lnc
LNC_005587	down	lnc
LNC_006082	down	lnc
LNC_006082	down	lnc
LNC_006082	down	lnc
LNC_006234	down	lnc
LNC_006234	down	lnc
LNC_006234	down	lnc
LNC_006234	down	lnc
LNC_006234	down	lnc
LNC_006292	down	lnc
LNC_006395	down	lnc
LNC_006684	down	lnc
LNC_006684	down	lnc
LNC_006684	down	lnc
LNC_006684	down	lnc
LNC_006821	down	lnc
LNC_006821	down	lnc
LNC_006821	down	lnc
LNC_006821	down	lnc
mmu-miR-1983	up	miR
mmu-miR-1983	up	miR
mmu-miR-1983	up	miR
mmu-miR-1983	up	miR
mmu-miR-1983	up	miR
mmu-miR-1983	up	miR
mmu-miR-1983	up	miR
mmu-miR-1983	up	miR
mmu-miR-1983	up	miR
mmu-miR-1983	up	miR
mmu-miR-1983	up	miR
mmu-miR-1983	up	miR
mmu-miR-1983	up	miR
mmu-miR-1983	up	miR
mmu-miR-1983	up	miR
mmu-miR-1983	up	miR
mmu-miR-1983	up	miR
mmu-miR-1983	up	miR
mmu-miR-1983	up	miR
mmu-miR-1983	up	miR
mmu-miR-1983	up	miR
mmu-miR-1983	up	miR
mmu-miR-1983	up	miR
mmu-miR-1983	up	miR
mmu-miR-1983	up	miR
mmu-miR-1983	up	miR
mmu-miR-1983	up	miR
mmu-miR-1983	up	miR
mmu-miR-1983	up	miR
mmu-miR-1983	up	miR
mmu-miR-219a-2-3p	up	miR
mmu-miR-219a-2-3p	up	miR
mmu-miR-219a-2-3p	up	miR
mmu-miR-219a-2-3p	up	miR
mmu-miR-219a-2-3p	up	miR
mmu-miR-219a-2-3p	up	miR
mmu-miR-219a-2-3p	up	miR
mmu-miR-219a-2-3p	up	miR
mmu-miR-219a-2-3p	up	miR
mmu-miR-219a-2-3p	up	miR
mmu-miR-219a-2-3p	up	miR
mmu-miR-219a-2-3p	up	miR
mmu-miR-219a-2-3p	up	miR
mmu-miR-219a-2-3p	up	miR
mmu-miR-219a-2-3p	up	miR
mmu-miR-219a-2-3p	up	miR
mmu-miR-219a-2-3p	up	miR
mmu-miR-219a-2-3p	up	miR
mmu-miR-219a-2-3p	up	miR
mmu-miR-219a-2-3p	up	miR
mmu-miR-219b-5p	up	miR
mmu-miR-219b-5p	up	miR
mmu-miR-219b-5p	up	miR
mmu-miR-219b-5p	up	miR
mmu-miR-219b-5p	up	miR
mmu-miR-219b-5p	up	miR
mmu-miR-219b-5p	up	miR
mmu-miR-219b-5p	up	miR
mmu-miR-219b-5p	up	miR
mmu-miR-219b-5p	up	miR
mmu-miR-219b-5p	up	miR
mmu-miR-219b-5p	up	miR
mmu-miR-219b-5p	up	miR
mmu-miR-219b-5p	up	miR
mmu-miR-219b-5p	up	miR
mmu-miR-219b-5p	up	miR
mmu-miR-219b-5p	up	miR
mmu-miR-219b-5p	up	miR
mmu-miR-219b-5p	up	miR
mmu-miR-219b-5p	up	miR
mmu-miR-219b-5p	up	miR
mmu-miR-219b-5p	up	miR
mmu-miR-219b-5p	up	miR
mmu-miR-22-5p	up	miR
mmu-miR-22-5p	up	miR
mmu-miR-22-5p	up	miR
mmu-miR-22-5p	up	miR
mmu-miR-22-5p	up	miR
mmu-miR-22-5p	up	miR
mmu-miR-22-5p	up	miR
mmu-miR-22-5p	up	miR
mmu-miR-22-5p	up	miR
mmu-miR-22-5p	up	miR
mmu-miR-22-5p	up	miR
mmu-miR-22-5p	up	miR
mmu-miR-22-5p	up	miR
mmu-miR-22-5p	up	miR
mmu-miR-22-5p	up	miR
mmu-miR-22-5p	up	miR
mmu-miR-22-5p	up	miR
mmu-miR-22-5p	up	miR
mmu-miR-22-5p	up	miR
mmu-miR-22-5p	up	miR
mmu-miR-22-5p	up	miR
mmu-miR-22-5p	up	miR
mmu-miR-22-5p	up	miR
mmu-miR-22-5p	up	miR
mmu-miR-22-5p	up	miR
mmu-miR-22-5p	up	miR
mmu-miR-22-5p	up	miR
mmu-miR-3058-5p	up	miR
mmu-miR-3058-5p	up	miR
mmu-miR-3058-5p	up	miR
mmu-miR-3058-5p	up	miR
mmu-miR-3058-5p	up	miR
mmu-miR-3058-5p	up	miR
mmu-miR-3058-5p	up	miR
mmu-miR-3058-5p	up	miR
mmu-miR-3058-5p	up	miR
mmu-miR-3058-5p	up	miR
mmu-miR-3058-5p	up	miR
mmu-miR-3058-5p	up	miR
mmu-miR-3058-5p	up	miR
mmu-miR-3058-5p	up	miR
mmu-miR-3058-5p	up	miR
mmu-miR-3058-5p	up	miR
mmu-miR-3058-5p	up	miR
mmu-miR-3058-5p	up	miR
mmu-miR-3058-5p	up	miR
mmu-miR-3058-5p	up	miR
mmu-miR-3058-5p	up	miR
mmu-miR-3058-5p	up	miR
mmu-miR-3058-5p	up	miR
mmu-miR-3058-5p	up	miR
mmu-miR-3058-5p	up	miR
mmu-miR-3058-5p	up	miR
mmu-miR-3058-5p	up	miR
mmu-miR-3058-5p	up	miR
mmu-miR-3058-5p	up	miR
mmu-miR-3058-5p	up	miR
mmu-miR-339-3p	up	miR
mmu-miR-339-3p	up	miR
mmu-miR-339-3p	up	miR
mmu-miR-339-3p	up	miR
mmu-miR-339-3p	up	miR
mmu-miR-339-3p	up	miR
mmu-miR-339-3p	up	miR
mmu-miR-339-3p	up	miR
mmu-miR-339-3p	up	miR
mmu-miR-339-3p	up	miR
mmu-miR-339-3p	up	miR
mmu-miR-339-3p	up	miR
mmu-miR-339-3p	up	miR
mmu-miR-339-3p	up	miR
mmu-miR-339-3p	up	miR
mmu-miR-339-3p	up	miR
mmu-miR-339-3p	up	miR
mmu-miR-339-3p	up	miR
mmu-miR-339-3p	up	miR
mmu-miR-339-3p	up	miR
mmu-miR-339-3p	up	miR
mmu-miR-339-3p	up	miR
mmu-miR-339-3p	up	miR
mmu-miR-339-3p	up	miR
mmu-miR-350-5p	up	miR
mmu-miR-350-5p	up	miR
mmu-miR-350-5p	up	miR
mmu-miR-350-5p	up	miR
mmu-miR-350-5p	up	miR
mmu-miR-350-5p	up	miR
mmu-miR-350-5p	up	miR
mmu-miR-350-5p	up	miR
mmu-miR-350-5p	up	miR
mmu-miR-350-5p	up	miR
mmu-miR-350-5p	up	miR
mmu-miR-350-5p	up	miR
mmu-miR-350-5p	up	miR
mmu-miR-350-5p	up	miR
mmu-miR-350-5p	up	miR
mmu-miR-350-5p	up	miR
mmu-miR-350-5p	up	miR
mmu-miR-350-5p	up	miR
mmu-miR-350-5p	up	miR
mmu-miR-350-5p	up	miR
mmu-miR-350-5p	up	miR
mmu-miR-350-5p	up	miR
mmu-miR-350-5p	up	miR
mmu-miR-350-5p	up	miR
mmu-miR-350-5p	up	miR
mmu-miR-350-5p	up	miR
mmu-miR-350-5p	up	miR
mmu-miR-350-5p	up	miR
mmu-miR-350-5p	up	miR
mmu-miR-350-5p	up	miR
mmu-miR-450b-5p	up	miR
mmu-miR-450b-5p	up	miR
mmu-miR-450b-5p	up	miR
mmu-miR-450b-5p	up	miR
mmu-miR-450b-5p	up	miR
mmu-miR-450b-5p	up	miR
mmu-miR-450b-5p	up	miR
mmu-miR-450b-5p	up	miR
mmu-miR-450b-5p	up	miR
mmu-miR-450b-5p	up	miR
mmu-miR-450b-5p	up	miR
mmu-miR-450b-5p	up	miR
mmu-miR-450b-5p	up	miR
mmu-miR-450b-5p	up	miR
mmu-miR-450b-5p	up	miR
mmu-miR-450b-5p	up	miR
mmu-miR-450b-5p	up	miR
mmu-miR-450b-5p	up	miR
mmu-miR-450b-5p	up	miR
mmu-miR-450b-5p	up	miR
mmu-miR-450b-5p	up	miR
mmu-miR-450b-5p	up	miR
mmu-miR-450b-5p	up	miR
mmu-miR-450b-5p	up	miR
mmu-miR-450b-5p	up	miR
mmu-miR-450b-5p	up	miR
mmu-miR-450b-5p	up	miR
mmu-miR-450b-5p	up	miR
mmu-miR-744-5p	up	miR
mmu-miR-744-5p	up	miR
mmu-miR-744-5p	up	miR
mmu-miR-744-5p	up	miR
mmu-miR-744-5p	up	miR
mmu-miR-744-5p	up	miR
mmu-miR-744-5p	up	miR
mmu-miR-744-5p	up	miR
mmu-miR-744-5p	up	miR
mmu-miR-744-5p	up	miR
mmu-miR-744-5p	up	miR
mmu-miR-744-5p	up	miR
mmu-miR-744-5p	up	miR
mmu-miR-744-5p	up	miR
mmu-miR-744-5p	up	miR
mmu-miR-744-5p	up	miR
mmu-miR-744-5p	up	miR
mmu-miR-744-5p	up	miR
mmu-miR-744-5p	up	miR
mmu-miR-744-5p	up	miR
mmu-miR-744-5p	up	miR
mmu-miR-744-5p	up	miR
mmu-miR-744-5p	up	miR
mmu-miR-744-5p	up	miR
mmu-miR-881-3p	up	miR
mmu-miR-881-3p	up	miR
mmu-miR-881-3p	up	miR
mmu-miR-881-3p	up	miR
mmu-miR-881-3p	up	miR
mmu-miR-881-3p	up	miR
mmu-miR-881-3p	up	miR
mmu-miR-881-3p	up	miR
mmu-miR-881-3p	up	miR
mmu-miR-881-3p	up	miR
mmu-miR-881-3p	up	miR
mmu-miR-881-3p	up	miR
mmu-miR-881-3p	up	miR
mmu-miR-881-3p	up	miR
mmu-miR-881-3p	up	miR
mmu-miR-881-3p	up	miR
mmu-miR-881-3p	up	miR
mmu-miR-881-3p	up	miR
mmu-miR-881-3p	up	miR
mmu-miR-881-3p	up	miR
mmu-miR-881-3p	up	miR
mmu-miR-881-3p	up	miR
mmu-miR-881-3p	up	miR
mmu-miR-881-3p	up	miR
mmu-miR-881-3p	up	miR
mmu-miR-881-3p	up	miR
mmu-miR-881-3p	up	miR
mmu-miR-9b-5p	up	miR
mmu-miR-9b-5p	up	miR
mmu-miR-9b-5p	up	miR
mmu-miR-9b-5p	up	miR
mmu-miR-9b-5p	up	miR
mmu-miR-9b-5p	up	miR
mmu-miR-9b-5p	up	miR
mmu-miR-9b-5p	up	miR
mmu-miR-9b-5p	up	miR
mmu-miR-9b-5p	up	miR
mmu-miR-9b-5p	up	miR
mmu-miR-9b-5p	up	miR
mmu-miR-9b-5p	up	miR
mmu-miR-9b-5p	up	miR
mmu-miR-9b-5p	up	miR
mmu-miR-9b-5p	up	miR
