# Supplementary material for: Identifying lncRNA–miRNA–mRNA networks to investigate Alzheimer’s disease pathogenesis and therapy strategy
Source: Aging (Albany NY). 2020 Feb 7;12(3):2897–920. doi: 10.18632/aging.102785 (PMC7041741; doi:10.18632/aging.102785)
Supplement: Supplementary Table 9 [file aging-12-102785-s008..xlsx]

## Sheet: node
Supplemental Table S9. Nodes interactions in the 6no9yes group
mmu-miR-30e-5p	Axin2
mmu-miR-376a-3p	Axin2
mmu-miR-1912-3p	Alox12
mmu-miR-133a-3p	Tom1l2
mmu-miR-101a-5p	Oprm1
mmu-miR-491-3p	Oprm1
mmu-miR-34b-5p	Tpd52l2
mmu-miR-1912-3p	Ccl3
mmu-miR-340-5p	Rac1
mmu-miR-340-5p	Vwf
mmu-miR-466b-5p	Golga2
mmu-miR-338-3p	Plin4
mmu-miR-3071-5p	Hmgn2
mmu-miR-204-5p	Dvl3
mmu-miR-101a-5p	Cdip1
mmu-miR-491-3p	Cdip1
mmu-miR-1298-5p	Ikbkg
mmu-miR-30e-5p	Cic
mmu-miR-448-3p	Cic
mmu-miR-101a-5p	Rfx5
mmu-miR-491-3p	Rfx5
mmu-miR-29c-3p	Nsmf
mmu-miR-34c-5p	Nsmf
mmu-miR-133a-3p	Scube2
mmu-miR-99a-3p	Cav1
mmu-miR-466b-5p	Hdac5
mmu-miR-338-3p	Ube2g2
mmu-miR-16-5p	Rnf168
mmu-miR-29b-3p	Rnf168
mmu-miR-101a-5p	Steap2
mmu-miR-491-3p	Steap2
mmu-miR-1912-3p	Anp32e
mmu-miR-136-3p	Pls3
mmu-miR-99a-3p	Plxdc1
mmu-miR-16-5p	Abr
mmu-miR-340-5p	Ctsa
mmu-miR-34b-5p	Crk
mmu-miR-133a-3p	Arid3a
mmu-miR-1970c-5p	Serinc1
mmu-miR-301a-3p	Serinc1
mmu-miR-1912-3p	Sirt1
mmu-miR-3065-5p	Srgn
mmu-miR-466b-5p	Srgn
mmu-miR-338-3p	Grb10
mmu-miR-99a-3p	Aldh1l2
mmu-miR-3071-5p	Nprl3
mmu-miR-30e-5p	Polrmt
mmu-miR-376a-3p	Polrmt
mmu-miR-448-3p	Polrmt
mmu-miR-466b-5p	Dynll2
mmu-miR-3071-5p	Fbf1
mmu-miR-16-5p	Atp2a3
mmu-miR-101a-5p	Acly
mmu-miR-204-5p	Gfap
mmu-miR-101a-5p	Foxg1
mmu-miR-491-3p	Foxg1
mmu-miR-1298-5p	Vti1b
mmu-miR-491-5p	Vti1b
mmu-miR-3065-5p	Tecpr2
mmu-miR-30e-5p	Tecpr2
mmu-miR-376a-3p	Tecpr2
mmu-miR-448-3p	Tecpr2
mmu-miR-10b-5p	Hnrnpk
mmu-miR-499-5p	Hnrnpk
mmu-miR-1298-5p	Agtpbp1
mmu-miR-491-5p	Agtpbp1
mmu-miR-99a-3p	Lats2
mmu-miR-136-3p	Hr
mmu-miR-10b-5p	Csmd3
mmu-miR-136-3p	Csmd3
mmu-miR-499-5p	Csmd3
mmu-miR-30e-5p	Tnfrsf17
mmu-miR-204-5p	Alcam
mmu-miR-3071-5p	Gtpbp8
mmu-miR-204-5p	Ap2m1
mmu-miR-29b-3p	Kansl2
mmu-miR-204-5p	Calcoco1
mmu-miR-340-5p	Tiam2
mmu-miR-136-3p	Cript
mmu-miR-133a-3p	Luc7l
mmu-miR-491-5p	Mib1
mmu-miR-338-3p	Cd6
mmu-miR-448-3p	Tnfrsf25
mmu-miR-376a-3p	Il33
mmu-miR-133a-3p	Sf1
mmu-miR-99a-3p	Sf1
mmu-miR-34b-5p	Aldh18a1
mmu-miR-301a-3p	Apex2
mmu-miR-1298-5p	Atp5a1
mmu-miR-491-5p	Atp5a1
mmu-miR-1298-5p	Asl
mmu-miR-204-5p	Slc15a1
mmu-miR-101a-5p	Agbl1
mmu-miR-491-3p	Agbl1
mmu-miR-3065-5p	Stag2
mmu-miR-30e-5p	Stag2
mmu-miR-376a-3p	Stag2
mmu-miR-448-3p	Stag2
mmu-miR-338-3p	Sgk3
mmu-miR-16-5p	Stk17b
mmu-miR-29b-3p	Stk17b
mmu-miR-133a-3p	Stat1
mmu-miR-99a-3p	Stat1
mmu-miR-3071-5p	Dst
mmu-miR-338-3p	Mff
mmu-miR-448-3p	Slc11a1
mmu-miR-101a-5p	Pdcd1
mmu-miR-491-3p	Pdcd1
mmu-miR-3065-5p	Actr3
mmu-miR-376a-3p	Actr3
mmu-miR-34b-5p	Syt2
mmu-miR-491-3p	Rgs7
mmu-miR-1970c-5p	Esrrg
mmu-miR-301a-3p	Esrrg
mmu-miR-10b-5p	Lpgat1
mmu-miR-136-3p	Lpgat1
mmu-miR-499-5p	Lpgat1
mmu-miR-301a-3p	Tatdn3
mmu-miR-133a-3p	Abi2
mmu-miR-466b-5p	Lrsam1
mmu-miR-133a-3p	Fubp3
mmu-miR-1298-5p	Ttll11
mmu-miR-491-5p	Ttll11
mmu-miR-1970c-5p	Camsap1
mmu-miR-34c-5p	Nmi
mmu-miR-3071-5p	Slc12a6
mmu-miR-3065-5p	Vps16
mmu-miR-30e-5p	Vps16
mmu-miR-448-3p	Vps16
mmu-miR-34b-5p	Stx16
mmu-miR-204-5p	Gnas
mmu-miR-3065-5p	Lrrcc1
mmu-miR-376a-3p	Lrrcc1
mmu-miR-29c-3p	Mecom
mmu-miR-34c-5p	Mecom
mmu-miR-16-5p	Postn
mmu-miR-29b-3p	Postn
mmu-miR-29c-3p	Slc33a1
mmu-miR-34c-5p	Slc33a1
mmu-miR-34b-5p	Adar
mmu-miR-16-5p	Kcnq5
mmu-miR-29b-3p	Kcnq5
mmu-miR-29c-3p	Epha7
mmu-miR-34c-5p	Epha7
mmu-miR-136-3p	Aptx
mmu-miR-466b-5p	Gne
mmu-miR-338-3p	Bnc2
mmu-miR-204-5p	Ak4
mmu-miR-466b-5p	Ak4
mmu-miR-34b-5p	Cc2d1b
mmu-miR-29b-3p	Echdc2
mmu-miR-3065-5p	Phc2
mmu-miR-30e-5p	Phc2
mmu-miR-448-3p	Phc2
mmu-miR-491-5p	Stmn1
mmu-miR-99a-3p	Epb4.1
mmu-miR-101a-5p	Nol9
mmu-miR-491-3p	Nol9
mmu-miR-10b-5p	Slc4a2
mmu-miR-466b-5p	Pcdh7
mmu-miR-1912-3p	Cdkl2
mmu-miR-34c-5p	Hsph1
mmu-miR-29c-3p	Col1a2
mmu-miR-10b-5p	Cbx3
mmu-miR-499-5p	Cbx3
mmu-miR-338-3p	Adamts9
mmu-miR-1912-3p	Wdr54
mmu-miR-338-3p	Arhgap25
mmu-miR-338-3p	Prok2
mmu-miR-101a-5p	Grip2
mmu-miR-1970c-5p	Itpr2
mmu-miR-301a-3p	Itpr2
mmu-miR-1298-5p	Atg7
mmu-miR-376a-3p	Dmpk
mmu-miR-34c-5p	Lrfn1
mmu-miR-99a-3p	Cln3
mmu-miR-3065-5p	Zkscan2
mmu-miR-30e-5p	Zkscan2
mmu-miR-448-3p	Zkscan2
mmu-miR-16-5p	Itgal
mmu-miR-133a-3p	Pgap2
mmu-miR-99a-3p	Pgap2
mmu-miR-3071-5p	Ano1
mmu-miR-340-5p	Syp
mmu-miR-34b-5p	Syp
mmu-miR-10b-5p	Rpgr
mmu-miR-499-5p	Rpgr
mmu-miR-338-3p	Heph
mmu-miR-340-5p	Cstf2
mmu-miR-34b-5p	Cstf2
mmu-miR-1912-3p	Ap1s2
mmu-miR-466b-5p	Carkd
mmu-miR-34b-5p	Heatr3
mmu-miR-466b-5p	St14
mmu-miR-499-5p	Tle3
mmu-miR-340-5p	Col12a1
mmu-miR-10b-5p	Eomes
mmu-miR-136-3p	Eomes
mmu-miR-499-5p	Eomes
mmu-miR-34b-5p	Pccb
mmu-miR-29b-3p	Ryk
mmu-miR-34b-5p	Atxn2l
mmu-miR-34b-5p	Hspa13
mmu-miR-133a-3p	Atg9a
mmu-miR-99a-3p	Atg9a
mmu-miR-30e-5p	Cysltr2
mmu-miR-204-5p	BC026585
mmu-miR-1912-3p	Fndc3c1
mmu-miR-29c-3p	Zbed5
mmu-miR-34c-5p	Zbed5
mmu-miR-99a-3p	Polq
mmu-miR-136-3p	Ppp1r18
mmu-miR-34c-5p	Ttc21b
mmu-miR-10b-5p	Synrg
mmu-miR-136-3p	Synrg
mmu-miR-499-5p	Synrg
mmu-miR-1970c-5p	Ccdc186
mmu-miR-16-5p	Oaz1
mmu-miR-29b-3p	Oaz1
mmu-miR-301a-3p	Myo1d
mmu-miR-10b-5p	Slc12a8
mmu-miR-136-3p	Slc12a8
mmu-miR-29c-3p	Capn5
mmu-miR-34c-5p	Capn5
mmu-miR-3071-5p	Ggta1
mmu-miR-133a-3p	Syt1
mmu-miR-10b-5p	Metap2
mmu-miR-499-5p	Metap2
mmu-miR-204-5p	Gramd1c
mmu-miR-1970c-5p	Tbc1d24
mmu-miR-301a-3p	Tbc1d24
mmu-miR-3065-5p	Hk1
mmu-miR-1298-5p	Fam168b
mmu-miR-491-5p	Fam168b
mmu-miR-34c-5p	Wdhd1
mmu-miR-101a-5p	Osbpl5
mmu-miR-338-3p	Ahdc1
mmu-miR-16-5p	Sirpa
mmu-miR-29b-3p	Sirpa
mmu-miR-301a-3p	Wnk2
mmu-miR-136-3p	Slc24a2
mmu-miR-340-5p	Acer2
mmu-miR-99a-3p	Gcc2
mmu-miR-1970c-5p	Prdm1
mmu-miR-376a-3p	Cep250
mmu-miR-340-5p	Ostm1
mmu-miR-34b-5p	Ncoa6
mmu-miR-34b-5p	Spsb2
mmu-miR-3065-5p	Nos1ap
mmu-miR-376a-3p	Nos1ap
mmu-miR-340-5p	Cdk19
mmu-miR-3071-5p	Gabpb2
mmu-miR-1298-5p	Tmem214
mmu-miR-491-5p	Tmem214
mmu-miR-3071-5p	Isg20
mmu-miR-1970c-5p	Azi2
mmu-miR-301a-3p	Azi2
mmu-miR-136-3p	Zfp189
mmu-miR-133a-3p	Ccdc40
mmu-miR-340-5p	Ccdc114
mmu-miR-133a-3p	Dnm3
mmu-miR-99a-3p	Dnm3
mmu-miR-29c-3p	Bcor
mmu-miR-466b-5p	Dgkz
mmu-miR-133a-3p	Wbscr27
mmu-miR-16-5p	Ap1g2
mmu-miR-29b-3p	Ap1g2
mmu-miR-3071-5p	Camta2
mmu-miR-204-5p	Erg
mmu-miR-340-5p	Crocc
mmu-miR-1298-5p	Iqsec2
mmu-miR-491-5p	Iqsec2
mmu-miR-1298-5p	Pla2g2d
mmu-miR-491-5p	Pla2g2d
mmu-miR-301a-3p	Mpped1
mmu-miR-204-5p	Kank3
mmu-miR-16-5p	0610010F05Rik
mmu-miR-29b-3p	0610010F05Rik
mmu-miR-101a-5p	Esm1
mmu-miR-491-3p	Esm1
mmu-miR-466b-5p	Fam227a
mmu-miR-1970c-5p	Safb2
mmu-miR-301a-3p	Safb2
mmu-miR-301a-3p	Pla2g6
mmu-miR-101a-5p	Hecw2
mmu-miR-491-3p	Hecw2
mmu-miR-29c-3p	Nrep
mmu-miR-34c-5p	Nrep
mmu-miR-133a-3p	Arl11
mmu-miR-3065-5p	Hfm1
mmu-miR-30e-5p	Hfm1
mmu-miR-376a-3p	Hfm1
mmu-miR-448-3p	Hfm1
mmu-miR-99a-3p	Lysmd4
mmu-miR-10b-5p	Fmn1
mmu-miR-136-3p	Fmn1
mmu-miR-499-5p	Fmn1
mmu-miR-491-3p	Cdkn2a
mmu-miR-491-5p	Slc15a5
mmu-miR-491-3p	Tmem232
mmu-miR-30e-5p	Wdr89
mmu-miR-448-3p	Wdr89
mmu-miR-1970c-5p	Oacyl
mmu-miR-101a-5p	Tifa
mmu-miR-491-3p	Tifa
mmu-miR-1912-3p	Chtf8
mmu-miR-16-5p	Mpeg1
mmu-miR-29b-3p	Mpeg1
mmu-miR-1912-3p	Mbtps2
mmu-miR-101a-5p	Tmem164
mmu-miR-491-3p	Tmem164
mmu-miR-466b-5p	Neurl3
mmu-miR-338-3p	Neurl4
mmu-miR-340-5p	Bri3
mmu-miR-1970c-5p	Duxbl1
mmu-miR-301a-3p	Duxbl1
mmu-miR-3065-5p	Thnsl1
mmu-miR-30e-5p	Thnsl1
mmu-miR-448-3p	Thnsl1
mmu-miR-10b-5p	Zfp710
mmu-miR-499-5p	Zfp710
mmu-miR-3065-5p	Slc17a5
mmu-miR-30e-5p	Slc17a5
mmu-miR-448-3p	Slc17a5
mmu-miR-29c-3p	Tor1aip2
mmu-miR-34c-5p	Tor1aip2
mmu-miR-491-5p	Ccdc126
mmu-miR-136-3p	Adarb2
mmu-miR-29c-3p	BC004004
mmu-miR-16-5p	Nrk
mmu-miR-29b-3p	Nrk
mmu-miR-3071-5p	Arhgef15
mmu-miR-1298-5p	Arhgap20
mmu-miR-3065-5p	Aldh7a1
mmu-miR-376a-3p	Aldh7a1
mmu-miR-1912-3p	Gon4l
mmu-miR-29c-3p	Adam10
mmu-miR-34c-5p	Adam10
mmu-miR-499-5p	Pcnxl3
mmu-miR-340-5p	Gm4861
mmu-miR-338-3p	Pgbd1
mmu-miR-29c-3p	Tead1
mmu-miR-3065-5p	Trim34a
mmu-miR-376a-3p	Trim34a
mmu-miR-448-3p	Trim34a
mmu-miR-10b-5p	Dnah9
mmu-miR-499-5p	Dnah9
mmu-miR-16-5p	Phf21a
mmu-miR-29b-3p	Phf21a
mmu-miR-466b-5p	Ccser2
mmu-miR-340-5p	Hnrnpa3
mmu-miR-1970c-5p	Sh2d3c
mmu-miR-301a-3p	Sh2d3c
mmu-miR-1298-5p	Gtf2i
mmu-miR-491-5p	Gtf2i
mmu-miR-1912-3p	Ppih
mmu-miR-204-5p	Stk19
mmu-miR-136-3p	Stx17
mmu-miR-3071-5p	Akr1b10
mmu-miR-16-5p	1810041L15Rik
mmu-miR-29b-3p	1810041L15Rik
mmu-miR-204-5p	Phactr2
mmu-miR-1912-3p	Cyp26b1
mmu-miR-10b-5p	Med14
mmu-miR-499-5p	Med14
mmu-miR-1912-3p	Zfp600
mmu-miR-1298-5p	Polr1c
mmu-miR-491-5p	Polr1c
mmu-miR-1970c-5p	Bpifb9a
mmu-miR-30e-5p	Slc4a5
mmu-miR-376a-3p	Slc4a5
mmu-miR-448-3p	Slc4a5
mmu-miR-3071-5p	Hist1h2bq
mmu-miR-338-3p	Ank3
mmu-miR-204-5p	Mpst
mmu-miR-99a-3p	Pydc4
mmu-miR-1970c-5p	Wdfy1
mmu-miR-1912-3p	2010315B03Rik
mmu-miR-3071-5p	Fnbp1
mmu-miR-1298-5p	2210404O09Rik
mmu-miR-29c-3p	Gm4070
mmu-miR-1970c-5p	Cbx6
mmu-miR-301a-3p	Cbx6
mmu-miR-29c-3p	Gm8113
mmu-miR-34c-5p	Gm8113
mmu-miR-466b-5p	Mpv17
mmu-miR-491-5p	DLK1
mmu-miR-10b-5p	Dgcr8
mmu-miR-499-5p	Dgcr8
mmu-miR-376a-3p	Trmt2a
mmu-miR-466b-5p	ENSMUST00000146227.7
mmu-miR-491-3p	ENSMUST00000146227.7
mmu-miR-204-5p	ENSMUST00000153113.1
mmu-miR-301a-3p	ENSMUST00000153113.1
mmu-miR-3065-5p	ENSMUST00000153113.1
mmu-miR-101a-5p	ENSMUST00000167899.2
mmu-miR-204-5p	ENSMUST00000167899.2
mmu-miR-338-3p	ENSMUST00000167899.2
mmu-miR-10b-5p	ENSMUST00000190991.1
mmu-miR-3071-5p	LNC_000026
mmu-miR-466b-5p	LNC_000259
mmu-miR-99a-3p	LNC_000265
mmu-miR-10b-5p	LNC_000346
mmu-miR-1912-3p	LNC_000403
mmu-miR-29b-3p	LNC_000403
mmu-miR-29c-3p	LNC_000403
mmu-miR-3065-5p	LNC_000403
mmu-miR-491-5p	LNC_000403
mmu-miR-16-5p	LNC_000406
mmu-miR-1912-3p	LNC_000406
mmu-miR-29b-3p	LNC_000406
mmu-miR-29c-3p	LNC_000406
mmu-miR-3065-5p	LNC_000406
mmu-miR-3071-5p	LNC_000407
mmu-miR-3071-5p	LNC_000471
mmu-miR-101a-5p	LNC_000600
mmu-miR-133a-3p	LNC_000600
mmu-miR-1970c-5p	LNC_000600
mmu-miR-338-3p	LNC_000600
mmu-miR-466b-5p	LNC_000600
mmu-miR-99a-3p	LNC_000600
mmu-miR-29b-3p	LNC_000764
mmu-miR-29c-3p	LNC_000764
mmu-miR-3071-5p	LNC_000764
mmu-miR-491-5p	LNC_000764
mmu-miR-99a-3p	LNC_000764
mmu-miR-10b-5p	LNC_000783
mmu-miR-34b-5p	LNC_000783
mmu-miR-10b-5p	LNC_000790
mmu-miR-29b-3p	LNC_000790
mmu-miR-29c-3p	LNC_000790
mmu-miR-338-3p	LNC_000790
mmu-miR-34b-5p	LNC_000790
mmu-miR-34c-5p	LNC_000790
mmu-miR-10b-5p	LNC_000996
mmu-miR-16-5p	LNC_000996
mmu-miR-34b-5p	LNC_000996
mmu-miR-34c-5p	LNC_000996
mmu-miR-448-3p	LNC_000996
mmu-miR-491-3p	LNC_000996
mmu-miR-338-3p	LNC_001004
mmu-miR-10b-5p	LNC_001162
mmu-miR-10b-5p	LNC_001371
mmu-miR-1970c-5p	LNC_001371
mmu-miR-301a-3p	LNC_001371
mmu-miR-491-5p	LNC_001371
mmu-miR-16-5p	LNC_001440
mmu-miR-491-5p	LNC_001440
mmu-miR-466b-5p	LNC_001441
mmu-miR-491-5p	LNC_001441
mmu-miR-16-5p	LNC_001453
mmu-miR-1912-3p	LNC_001453
mmu-miR-204-5p	LNC_001453
mmu-miR-3065-5p	LNC_001453
mmu-miR-338-3p	LNC_001453
mmu-miR-448-3p	LNC_001453
mmu-miR-101a-5p	LNC_001501
mmu-miR-1970c-5p	LNC_001501
mmu-miR-204-5p	LNC_001501
mmu-miR-301a-3p	LNC_001501
mmu-miR-3065-5p	LNC_001501
mmu-miR-30e-5p	LNC_001501
mmu-miR-466b-5p	LNC_001501
mmu-miR-16-5p	LNC_001503
mmu-miR-1970c-5p	LNC_001503
mmu-miR-204-5p	LNC_001503
mmu-miR-301a-3p	LNC_001503
mmu-miR-101a-5p	LNC_001554
mmu-miR-16-5p	LNC_001575
mmu-miR-1912-3p	LNC_001575
mmu-miR-1970c-5p	LNC_001575
mmu-miR-491-3p	LNC_001575
mmu-miR-499-5p	LNC_001575
mmu-miR-1912-3p	LNC_001601
mmu-miR-338-3p	LNC_001727
mmu-miR-10b-5p	LNC_001888
mmu-miR-3065-5p	LNC_001888
mmu-miR-30e-5p	LNC_001888
mmu-miR-34b-5p	LNC_001888
mmu-miR-34c-5p	LNC_001888
mmu-miR-466b-5p	LNC_001888
mmu-miR-10b-5p	LNC_002006
mmu-miR-16-5p	LNC_002006
mmu-miR-1970c-5p	LNC_002006
mmu-miR-204-5p	LNC_002006
mmu-miR-29b-3p	LNC_002006
mmu-miR-29c-3p	LNC_002006
mmu-miR-30e-5p	LNC_002006
mmu-miR-338-3p	LNC_002006
mmu-miR-340-5p	LNC_002006
mmu-miR-34c-5p	LNC_002006
mmu-miR-448-3p	LNC_002006
mmu-miR-491-5p	LNC_002006
mmu-miR-10b-5p	LNC_002255
mmu-miR-133a-3p	LNC_002255
mmu-miR-29b-3p	LNC_002255
mmu-miR-29c-3p	LNC_002255
mmu-miR-1912-3p	LNC_002299
mmu-miR-204-5p	LNC_002314
mmu-miR-29b-3p	LNC_002314
mmu-miR-29c-3p	LNC_002314
mmu-miR-338-3p	LNC_002314
mmu-miR-491-3p	LNC_002314
mmu-miR-29b-3p	LNC_002315
mmu-miR-29c-3p	LNC_002315
mmu-miR-466b-5p	LNC_002315
mmu-miR-1912-3p	LNC_002317
mmu-miR-3065-5p	LNC_002317
mmu-miR-448-3p	LNC_002317
mmu-miR-101a-5p	LNC_002401
mmu-miR-136-3p	LNC_002401
mmu-miR-1970c-5p	LNC_002401
mmu-miR-30e-5p	LNC_002401
mmu-miR-34b-5p	LNC_002401
mmu-miR-34c-5p	LNC_002401
mmu-miR-499-5p	LNC_002401
mmu-miR-10b-5p	LNC_002423
mmu-miR-29b-3p	LNC_002423
mmu-miR-29c-3p	LNC_002423
mmu-miR-34b-5p	LNC_002423
mmu-miR-34c-5p	LNC_002423
mmu-miR-448-3p	LNC_002423
mmu-miR-340-5p	LNC_002709
mmu-miR-1970c-5p	LNC_002906
mmu-miR-3071-5p	LNC_002906
mmu-miR-133a-3p	LNC_002985
mmu-miR-204-5p	LNC_002985
mmu-miR-3071-5p	LNC_002985
mmu-miR-466b-5p	LNC_002985
mmu-miR-99a-3p	LNC_002985
mmu-miR-136-3p	LNC_003069
mmu-miR-16-5p	LNC_003069
mmu-miR-29b-3p	LNC_003069
mmu-miR-29c-3p	LNC_003069
mmu-miR-3065-5p	LNC_003069
mmu-miR-10b-5p	LNC_003165
mmu-miR-16-5p	LNC_003165
mmu-miR-3065-5p	LNC_003165
mmu-miR-30e-5p	LNC_003165
mmu-miR-16-5p	LNC_003173
mmu-miR-204-5p	LNC_003173
mmu-miR-301a-3p	LNC_003173
mmu-miR-30e-5p	LNC_003173
mmu-miR-491-3p	LNC_003173
mmu-miR-99a-3p	LNC_003173
mmu-miR-204-5p	LNC_003175
mmu-miR-301a-3p	LNC_003175
mmu-miR-30e-5p	LNC_003175
mmu-miR-491-3p	LNC_003175
mmu-miR-99a-3p	LNC_003175
mmu-miR-10b-5p	LNC_003407
mmu-miR-133a-3p	LNC_003434
mmu-miR-1970c-5p	LNC_003434
mmu-miR-338-3p	LNC_003434
mmu-miR-466b-5p	LNC_003434
mmu-miR-136-3p	LNC_003568
mmu-miR-16-5p	LNC_003568
mmu-miR-133a-3p	LNC_003772
mmu-miR-29b-3p	LNC_003772
mmu-miR-29c-3p	LNC_003772
mmu-miR-338-3p	LNC_003772
mmu-miR-34b-5p	LNC_003772
mmu-miR-34c-5p	LNC_003772
mmu-miR-29b-3p	LNC_003853
mmu-miR-29c-3p	LNC_003853
mmu-miR-34b-5p	LNC_003853
mmu-miR-34c-5p	LNC_003853
mmu-miR-99a-3p	LNC_003853
mmu-miR-133a-3p	LNC_003903
mmu-miR-1912-3p	LNC_003903
mmu-miR-3071-5p	LNC_003903
mmu-miR-34b-5p	LNC_003903
mmu-miR-499-5p	LNC_003903
mmu-miR-30e-5p	LNC_003968
mmu-miR-101a-5p	LNC_004019
mmu-miR-16-5p	LNC_004019
mmu-miR-3065-5p	LNC_004019
mmu-miR-34b-5p	LNC_004019
mmu-miR-34c-5p	LNC_004019
mmu-miR-466b-5p	LNC_004019
mmu-miR-204-5p	LNC_004072
mmu-miR-3071-5p	LNC_004072
mmu-miR-338-3p	LNC_004072
mmu-miR-466b-5p	LNC_004072
mmu-miR-1912-3p	LNC_004117
mmu-miR-491-5p	LNC_004117
mmu-miR-3071-5p	LNC_004207
mmu-miR-204-5p	LNC_004216
mmu-miR-3065-5p	LNC_004216
mmu-miR-29b-3p	LNC_004268
mmu-miR-29c-3p	LNC_004268
mmu-miR-3065-5p	LNC_004268
mmu-miR-30e-5p	LNC_004268
mmu-miR-466b-5p	LNC_004268
mmu-miR-3071-5p	LNC_004314
mmu-miR-466b-5p	LNC_004314
mmu-miR-16-5p	LNC_004563
mmu-miR-34b-5p	LNC_004563
mmu-miR-34c-5p	LNC_004563
mmu-miR-491-5p	LNC_004563
mmu-miR-136-3p	LNC_004640
mmu-miR-1970c-5p	LNC_004640
mmu-miR-1970c-5p	LNC_004679
mmu-miR-448-3p	LNC_004679
mmu-miR-491-3p	LNC_004679
mmu-miR-499-5p	LNC_004679
mmu-miR-101a-5p	LNC_004888
mmu-miR-136-3p	LNC_004888
mmu-miR-1912-3p	LNC_004888
mmu-miR-1970c-5p	LNC_004888
mmu-miR-29b-3p	LNC_004888
mmu-miR-29c-3p	LNC_004888
mmu-miR-34b-5p	LNC_004888
mmu-miR-34c-5p	LNC_004888
mmu-miR-448-3p	LNC_004888
mmu-miR-491-5p	LNC_004888
mmu-miR-101a-5p	LNC_004932
mmu-miR-1912-3p	LNC_004932
mmu-miR-30e-5p	LNC_004932
mmu-miR-338-3p	LNC_004932
mmu-miR-448-3p	LNC_004932
mmu-miR-491-5p	LNC_004932
mmu-miR-10b-5p	LNC_005156
mmu-miR-16-5p	LNC_005156
mmu-miR-448-3p	LNC_005156
mmu-miR-491-5p	LNC_005156
mmu-miR-1912-3p	LNC_005325
mmu-miR-448-3p	LNC_005325
mmu-miR-466b-5p	LNC_005325
mmu-miR-1912-3p	LNC_005539
mmu-miR-29b-3p	LNC_005539
mmu-miR-29c-3p	LNC_005539
mmu-miR-376a-3p	LNC_005622
mmu-miR-133a-3p	LNC_005796
mmu-miR-34b-5p	LNC_005796
mmu-miR-34c-5p	LNC_005796
mmu-miR-10b-5p	LNC_005860
mmu-miR-136-3p	LNC_005860
mmu-miR-204-5p	LNC_005860
mmu-miR-3065-5p	LNC_005860
mmu-miR-30e-5p	LNC_005860
mmu-miR-491-5p	LNC_005860
mmu-miR-1912-3p	LNC_005876
mmu-miR-34c-5p	LNC_005985
mmu-miR-491-5p	LNC_005985
mmu-miR-204-5p	LNC_006088
mmu-miR-301a-3p	LNC_006088
mmu-miR-34b-5p	LNC_006088
mmu-miR-34c-5p	LNC_006088
mmu-miR-491-3p	LNC_006088
mmu-miR-133a-3p	LNC_006358
mmu-miR-3065-5p	LNC_006358
mmu-miR-340-5p	LNC_006358
mmu-miR-301a-3p	LNC_006425
mmu-miR-34b-5p	LNC_006425
mmu-miR-34c-5p	LNC_006425
mmu-miR-301a-3p	LNC_006441
mmu-miR-338-3p	LNC_006441
mmu-miR-491-5p	LNC_006441
mmu-miR-3065-5p	LNC_006453
mmu-miR-16-5p	LNC_006812
mmu-miR-1298-5p	LNC_006819
mmu-miR-466b-5p	LNC_006819
mmu-miR-491-5p	LNC_006819

## Sheet: type
Supplementary Table S9. Nodes types in the 6no9yes group
Axin2	up	gene
Axin2	up	gene
Alox12	up	gene
Tom1l2	up	gene
Oprm1	up	gene
Oprm1	up	gene
Tpd52l2	up	gene
Ccl3	up	gene
Rac1	up	gene
Vwf	up	gene
Golga2	up	gene
Plin4	up	gene
Hmgn2	up	gene
Dvl3	up	gene
Cdip1	up	gene
Cdip1	up	gene
Ikbkg	up	gene
Cic	up	gene
Cic	up	gene
Rfx5	up	gene
Rfx5	up	gene
Nsmf	up	gene
Nsmf	up	gene
Scube2	up	gene
Cav1	up	gene
Hdac5	up	gene
Ube2g2	up	gene
Rnf168	up	gene
Rnf168	up	gene
Steap2	up	gene
Steap2	up	gene
Anp32e	up	gene
Pls3	up	gene
Plxdc1	up	gene
Abr	up	gene
Ctsa	up	gene
Crk	up	gene
Arid3a	up	gene
Serinc1	up	gene
Serinc1	up	gene
Sirt1	up	gene
Srgn	up	gene
Srgn	up	gene
Grb10	up	gene
Aldh1l2	up	gene
Nprl3	up	gene
Polrmt	up	gene
Polrmt	up	gene
Polrmt	up	gene
Dynll2	up	gene
Fbf1	up	gene
Atp2a3	up	gene
Acly	up	gene
Gfap	up	gene
Foxg1	up	gene
Foxg1	up	gene
Vti1b	up	gene
Vti1b	up	gene
Tecpr2	up	gene
Tecpr2	up	gene
Tecpr2	up	gene
Tecpr2	up	gene
Hnrnpk	up	gene
Hnrnpk	up	gene
Agtpbp1	up	gene
Agtpbp1	up	gene
Lats2	up	gene
Hr	up	gene
Csmd3	up	gene
Csmd3	up	gene
Csmd3	up	gene
Tnfrsf17	up	gene
Alcam	up	gene
Gtpbp8	up	gene
Ap2m1	up	gene
Kansl2	up	gene
Calcoco1	up	gene
Tiam2	up	gene
Cript	up	gene
Luc7l	up	gene
Mib1	up	gene
Cd6	up	gene
Tnfrsf25	up	gene
Il33	up	gene
Sf1	up	gene
Sf1	up	gene
Aldh18a1	up	gene
Apex2	up	gene
Atp5a1	up	gene
Atp5a1	up	gene
Asl	up	gene
Slc15a1	up	gene
Agbl1	up	gene
Agbl1	up	gene
Stag2	up	gene
Stag2	up	gene
Stag2	up	gene
Stag2	up	gene
Sgk3	up	gene
Stk17b	up	gene
Stk17b	up	gene
Stat1	up	gene
Stat1	up	gene
Dst	up	gene
Mff	up	gene
Slc11a1	up	gene
Pdcd1	up	gene
Pdcd1	up	gene
Actr3	up	gene
Actr3	up	gene
Syt2	up	gene
Rgs7	up	gene
Esrrg	up	gene
Esrrg	up	gene
Lpgat1	up	gene
Lpgat1	up	gene
Lpgat1	up	gene
Tatdn3	up	gene
Abi2	up	gene
Lrsam1	up	gene
Fubp3	up	gene
Ttll11	up	gene
Ttll11	up	gene
Camsap1	up	gene
Nmi	up	gene
Slc12a6	up	gene
Vps16	up	gene
Vps16	up	gene
Vps16	up	gene
Stx16	up	gene
Gnas	up	gene
Lrrcc1	up	gene
Lrrcc1	up	gene
Mecom	up	gene
Mecom	up	gene
Postn	up	gene
Postn	up	gene
Slc33a1	up	gene
Slc33a1	up	gene
Adar	up	gene
Kcnq5	up	gene
Kcnq5	up	gene
Epha7	up	gene
Epha7	up	gene
Aptx	up	gene
Gne	up	gene
Bnc2	up	gene
Ak4	up	gene
Ak4	up	gene
Cc2d1b	up	gene
Echdc2	up	gene
Phc2	up	gene
Phc2	up	gene
Phc2	up	gene
Stmn1	up	gene
Epb4.1	up	gene
Nol9	up	gene
Nol9	up	gene
Slc4a2	up	gene
Pcdh7	up	gene
Cdkl2	up	gene
Hsph1	up	gene
Col1a2	up	gene
Cbx3	up	gene
Cbx3	up	gene
Adamts9	up	gene
Wdr54	up	gene
Arhgap25	up	gene
Prok2	up	gene
Grip2	up	gene
Itpr2	up	gene
Itpr2	up	gene
Atg7	up	gene
Dmpk	up	gene
Lrfn1	up	gene
Cln3	up	gene
Zkscan2	up	gene
Zkscan2	up	gene
Zkscan2	up	gene
Itgal	up	gene
Pgap2	up	gene
Pgap2	up	gene
Ano1	up	gene
Syp	up	gene
Syp	up	gene
Rpgr	up	gene
Rpgr	up	gene
Heph	up	gene
Cstf2	up	gene
Cstf2	up	gene
Ap1s2	up	gene
Carkd	up	gene
Heatr3	up	gene
St14	up	gene
Tle3	up	gene
Col12a1	up	gene
Eomes	up	gene
Eomes	up	gene
Eomes	up	gene
Pccb	up	gene
Ryk	up	gene
Atxn2l	up	gene
Hspa13	up	gene
Atg9a	up	gene
Atg9a	up	gene
Cysltr2	up	gene
BC026585	up	gene
Fndc3c1	up	gene
Zbed5	up	gene
Zbed5	up	gene
Polq	up	gene
Ppp1r18	up	gene
Ttc21b	up	gene
Synrg	up	gene
Synrg	up	gene
Synrg	up	gene
Ccdc186	up	gene
Oaz1	up	gene
Oaz1	up	gene
Myo1d	up	gene
Slc12a8	up	gene
Slc12a8	up	gene
Capn5	up	gene
Capn5	up	gene
Ggta1	up	gene
Syt1	up	gene
Metap2	up	gene
Metap2	up	gene
Gramd1c	up	gene
Tbc1d24	up	gene
Tbc1d24	up	gene
Hk1	up	gene
Fam168b	up	gene
Fam168b	up	gene
Wdhd1	up	gene
Osbpl5	up	gene
Ahdc1	up	gene
Sirpa	up	gene
Sirpa	up	gene
Wnk2	up	gene
Slc24a2	up	gene
Acer2	up	gene
Gcc2	up	gene
Prdm1	up	gene
Cep250	up	gene
Ostm1	up	gene
Ncoa6	up	gene
Spsb2	up	gene
Nos1ap	up	gene
Nos1ap	up	gene
Cdk19	up	gene
Gabpb2	up	gene
Tmem214	up	gene
Tmem214	up	gene
Isg20	up	gene
Azi2	up	gene
Azi2	up	gene
Zfp189	up	gene
Ccdc40	up	gene
Ccdc114	up	gene
Dnm3	up	gene
Dnm3	up	gene
Bcor	up	gene
Dgkz	up	gene
Wbscr27	up	gene
Ap1g2	up	gene
Ap1g2	up	gene
Camta2	up	gene
Erg	up	gene
Crocc	up	gene
Iqsec2	up	gene
Iqsec2	up	gene
Pla2g2d	up	gene
Pla2g2d	up	gene
Mpped1	up	gene
Kank3	up	gene
0610010F05Rik	up	gene
0610010F05Rik	up	gene
Esm1	up	gene
Esm1	up	gene
Fam227a	up	gene
Safb2	up	gene
Safb2	up	gene
Pla2g6	up	gene
Hecw2	up	gene
Hecw2	up	gene
Nrep	up	gene
Nrep	up	gene
Arl11	up	gene
Hfm1	up	gene
Hfm1	up	gene
Hfm1	up	gene
Hfm1	up	gene
Lysmd4	up	gene
Fmn1	up	gene
Fmn1	up	gene
Fmn1	up	gene
Cdkn2a	up	gene
Slc15a5	up	gene
Tmem232	up	gene
Wdr89	up	gene
Wdr89	up	gene
Oacyl	up	gene
Tifa	up	gene
Tifa	up	gene
Chtf8	up	gene
Mpeg1	up	gene
Mpeg1	up	gene
Mbtps2	up	gene
Tmem164	up	gene
Tmem164	up	gene
Neurl3	up	gene
Neurl4	up	gene
Bri3	up	gene
Duxbl1	up	gene
Duxbl1	up	gene
Thnsl1	up	gene
Thnsl1	up	gene
Thnsl1	up	gene
Zfp710	up	gene
Zfp710	up	gene
Slc17a5	up	gene
Slc17a5	up	gene
Slc17a5	up	gene
Tor1aip2	up	gene
Tor1aip2	up	gene
Ccdc126	up	gene
Adarb2	up	gene
BC004004	up	gene
Nrk	up	gene
Nrk	up	gene
Arhgef15	up	gene
Arhgap20	up	gene
Aldh7a1	up	gene
Aldh7a1	up	gene
Gon4l	up	gene
Adam10	up	gene
Adam10	up	gene
Pcnxl3	up	gene
Gm4861	up	gene
Pgbd1	up	gene
Tead1	up	gene
Trim34a	up	gene
Trim34a	up	gene
Trim34a	up	gene
Dnah9	up	gene
Dnah9	up	gene
Phf21a	up	gene
Phf21a	up	gene
Ccser2	up	gene
Hnrnpa3	up	gene
Sh2d3c	up	gene
Sh2d3c	up	gene
Gtf2i	up	gene
Gtf2i	up	gene
Ppih	up	gene
Stk19	up	gene
Stx17	up	gene
Akr1b10	up	gene
1810041L15Rik	up	gene
1810041L15Rik	up	gene
Phactr2	up	gene
Cyp26b1	up	gene
Med14	up	gene
Med14	up	gene
Zfp600	up	gene
Polr1c	up	gene
Polr1c	up	gene
Bpifb9a	up	gene
Slc4a5	up	gene
Slc4a5	up	gene
Slc4a5	up	gene
Hist1h2bq	up	gene
Ank3	up	gene
Mpst	up	gene
Pydc4	up	gene
Wdfy1	up	gene
2010315B03Rik	up	gene
Fnbp1	up	gene
2210404O09Rik	up	gene
Gm4070	up	gene
Cbx6	up	gene
Cbx6	up	gene
Gm8113	up	gene
Gm8113	up	gene
Mpv17	up	gene
DLK1	up	gene
Dgcr8	up	gene
Dgcr8	up	gene
Trmt2a	up	gene
ENSMUST00000146227.7	up	lnc
ENSMUST00000146227.7	up	lnc
ENSMUST00000153113.1	up	lnc
ENSMUST00000153113.1	up	lnc
ENSMUST00000153113.1	up	lnc
ENSMUST00000167899.2	up	lnc
ENSMUST00000167899.2	up	lnc
ENSMUST00000167899.2	up	lnc
ENSMUST00000190991.1	up	lnc
LNC_000026	up	lnc
LNC_000259	up	lnc
LNC_000265	up	lnc
LNC_000346	up	lnc
LNC_000403	up	lnc
LNC_000403	up	lnc
LNC_000403	up	lnc
LNC_000403	up	lnc
LNC_000403	up	lnc
LNC_000406	up	lnc
LNC_000406	up	lnc
LNC_000406	up	lnc
LNC_000406	up	lnc
LNC_000406	up	lnc
LNC_000407	up	lnc
LNC_000471	up	lnc
LNC_000600	up	lnc
LNC_000600	up	lnc
LNC_000600	up	lnc
LNC_000600	up	lnc
LNC_000600	up	lnc
LNC_000600	up	lnc
LNC_000764	up	lnc
LNC_000764	up	lnc
LNC_000764	up	lnc
LNC_000764	up	lnc
LNC_000764	up	lnc
LNC_000783	up	lnc
LNC_000783	up	lnc
LNC_000790	up	lnc
LNC_000790	up	lnc
LNC_000790	up	lnc
LNC_000790	up	lnc
LNC_000790	up	lnc
LNC_000790	up	lnc
LNC_000996	up	lnc
LNC_000996	up	lnc
LNC_000996	up	lnc
LNC_000996	up	lnc
LNC_000996	up	lnc
LNC_000996	up	lnc
LNC_001004	up	lnc
LNC_001162	up	lnc
LNC_001371	up	lnc
LNC_001371	up	lnc
LNC_001371	up	lnc
LNC_001371	up	lnc
LNC_001440	up	lnc
LNC_001440	up	lnc
LNC_001441	up	lnc
LNC_001441	up	lnc
LNC_001453	up	lnc
LNC_001453	up	lnc
LNC_001453	up	lnc
LNC_001453	up	lnc
LNC_001453	up	lnc
LNC_001453	up	lnc
LNC_001501	up	lnc
LNC_001501	up	lnc
LNC_001501	up	lnc
LNC_001501	up	lnc
LNC_001501	up	lnc
LNC_001501	up	lnc
LNC_001501	up	lnc
LNC_001503	up	lnc
LNC_001503	up	lnc
LNC_001503	up	lnc
LNC_001503	up	lnc
LNC_001554	up	lnc
LNC_001575	up	lnc
LNC_001575	up	lnc
LNC_001575	up	lnc
LNC_001575	up	lnc
LNC_001575	up	lnc
LNC_001601	up	lnc
LNC_001727	up	lnc
LNC_001888	up	lnc
LNC_001888	up	lnc
LNC_001888	up	lnc
LNC_001888	up	lnc
LNC_001888	up	lnc
LNC_001888	up	lnc
LNC_002006	up	lnc
LNC_002006	up	lnc
LNC_002006	up	lnc
LNC_002006	up	lnc
LNC_002006	up	lnc
LNC_002006	up	lnc
LNC_002006	up	lnc
LNC_002006	up	lnc
LNC_002006	up	lnc
LNC_002006	up	lnc
LNC_002006	up	lnc
LNC_002006	up	lnc
LNC_002255	up	lnc
LNC_002255	up	lnc
LNC_002255	up	lnc
LNC_002255	up	lnc
LNC_002299	up	lnc
LNC_002314	up	lnc
LNC_002314	up	lnc
LNC_002314	up	lnc
LNC_002314	up	lnc
LNC_002314	up	lnc
LNC_002315	up	lnc
LNC_002315	up	lnc
LNC_002315	up	lnc
LNC_002317	up	lnc
LNC_002317	up	lnc
LNC_002317	up	lnc
LNC_002401	up	lnc
LNC_002401	up	lnc
LNC_002401	up	lnc
LNC_002401	up	lnc
LNC_002401	up	lnc
LNC_002401	up	lnc
LNC_002401	up	lnc
LNC_002423	up	lnc
LNC_002423	up	lnc
LNC_002423	up	lnc
LNC_002423	up	lnc
LNC_002423	up	lnc
LNC_002423	up	lnc
LNC_002709	up	lnc
LNC_002906	up	lnc
LNC_002906	up	lnc
LNC_002985	up	lnc
LNC_002985	up	lnc
LNC_002985	up	lnc
LNC_002985	up	lnc
LNC_002985	up	lnc
LNC_003069	up	lnc
LNC_003069	up	lnc
LNC_003069	up	lnc
LNC_003069	up	lnc
LNC_003069	up	lnc
LNC_003165	up	lnc
LNC_003165	up	lnc
LNC_003165	up	lnc
LNC_003165	up	lnc
LNC_003173	up	lnc
LNC_003173	up	lnc
LNC_003173	up	lnc
LNC_003173	up	lnc
LNC_003173	up	lnc
LNC_003173	up	lnc
LNC_003175	up	lnc
LNC_003175	up	lnc
LNC_003175	up	lnc
LNC_003175	up	lnc
LNC_003175	up	lnc
LNC_003407	up	lnc
LNC_003434	up	lnc
LNC_003434	up	lnc
LNC_003434	up	lnc
LNC_003434	up	lnc
LNC_003568	up	lnc
LNC_003568	up	lnc
LNC_003772	up	lnc
LNC_003772	up	lnc
LNC_003772	up	lnc
LNC_003772	up	lnc
LNC_003772	up	lnc
LNC_003772	up	lnc
LNC_003853	up	lnc
LNC_003853	up	lnc
LNC_003853	up	lnc
LNC_003853	up	lnc
LNC_003853	up	lnc
LNC_003903	up	lnc
LNC_003903	up	lnc
LNC_003903	up	lnc
LNC_003903	up	lnc
LNC_003903	up	lnc
LNC_003968	up	lnc
LNC_004019	up	lnc
LNC_004019	up	lnc
LNC_004019	up	lnc
LNC_004019	up	lnc
LNC_004019	up	lnc
LNC_004019	up	lnc
LNC_004072	up	lnc
LNC_004072	up	lnc
LNC_004072	up	lnc
LNC_004072	up	lnc
LNC_004117	up	lnc
LNC_004117	up	lnc
LNC_004207	up	lnc
LNC_004216	up	lnc
LNC_004216	up	lnc
LNC_004268	up	lnc
LNC_004268	up	lnc
LNC_004268	up	lnc
LNC_004268	up	lnc
LNC_004268	up	lnc
LNC_004314	up	lnc
LNC_004314	up	lnc
LNC_004563	up	lnc
LNC_004563	up	lnc
LNC_004563	up	lnc
LNC_004563	up	lnc
LNC_004640	up	lnc
LNC_004640	up	lnc
LNC_004679	up	lnc
LNC_004679	up	lnc
LNC_004679	up	lnc
LNC_004679	up	lnc
LNC_004888	up	lnc
LNC_004888	up	lnc
LNC_004888	up	lnc
LNC_004888	up	lnc
LNC_004888	up	lnc
LNC_004888	up	lnc
LNC_004888	up	lnc
LNC_004888	up	lnc
LNC_004888	up	lnc
LNC_004888	up	lnc
LNC_004932	up	lnc
LNC_004932	up	lnc
LNC_004932	up	lnc
LNC_004932	up	lnc
LNC_004932	up	lnc
LNC_004932	up	lnc
LNC_005156	up	lnc
LNC_005156	up	lnc
LNC_005156	up	lnc
LNC_005156	up	lnc
LNC_005325	up	lnc
LNC_005325	up	lnc
LNC_005325	up	lnc
LNC_005539	up	lnc
LNC_005539	up	lnc
LNC_005539	up	lnc
LNC_005622	up	lnc
LNC_005796	up	lnc
LNC_005796	up	lnc
LNC_005796	up	lnc
LNC_005860	up	lnc
LNC_005860	up	lnc
LNC_005860	up	lnc
LNC_005860	up	lnc
LNC_005860	up	lnc
LNC_005860	up	lnc
LNC_005876	up	lnc
LNC_005985	up	lnc
LNC_005985	up	lnc
LNC_006088	up	lnc
LNC_006088	up	lnc
LNC_006088	up	lnc
LNC_006088	up	lnc
LNC_006088	up	lnc
LNC_006358	up	lnc
LNC_006358	up	lnc
LNC_006358	up	lnc
LNC_006425	up	lnc
LNC_006425	up	lnc
LNC_006425	up	lnc
LNC_006441	up	lnc
LNC_006441	up	lnc
LNC_006441	up	lnc
LNC_006453	up	lnc
LNC_006812	up	lnc
LNC_006819	up	lnc
LNC_006819	up	lnc
LNC_006819	up	lnc
mmu-miR-101a-5p	down	miR
mmu-miR-101a-5p	down	miR
mmu-miR-101a-5p	down	miR
mmu-miR-101a-5p	down	miR
mmu-miR-101a-5p	down	miR
mmu-miR-101a-5p	down	miR
mmu-miR-101a-5p	down	miR
mmu-miR-101a-5p	down	miR
mmu-miR-101a-5p	down	miR
mmu-miR-101a-5p	down	miR
mmu-miR-101a-5p	down	miR
mmu-miR-101a-5p	down	miR
mmu-miR-101a-5p	down	miR
mmu-miR-101a-5p	down	miR
mmu-miR-101a-5p	down	miR
mmu-miR-101a-5p	down	miR
mmu-miR-101a-5p	down	miR
mmu-miR-101a-5p	down	miR
mmu-miR-101a-5p	down	miR
mmu-miR-101a-5p	down	miR
mmu-miR-101a-5p	down	miR
mmu-miR-101a-5p	down	miR
mmu-miR-101a-5p	down	miR
mmu-miR-10b-5p	down	miR
mmu-miR-10b-5p	down	miR
mmu-miR-10b-5p	down	miR
mmu-miR-10b-5p	down	miR
mmu-miR-10b-5p	down	miR
mmu-miR-10b-5p	down	miR
mmu-miR-10b-5p	down	miR
mmu-miR-10b-5p	down	miR
mmu-miR-10b-5p	down	miR
mmu-miR-10b-5p	down	miR
mmu-miR-10b-5p	down	miR
mmu-miR-10b-5p	down	miR
mmu-miR-10b-5p	down	miR
mmu-miR-10b-5p	down	miR
mmu-miR-10b-5p	down	miR
mmu-miR-10b-5p	down	miR
mmu-miR-10b-5p	down	miR
mmu-miR-10b-5p	down	miR
mmu-miR-10b-5p	down	miR
mmu-miR-10b-5p	down	miR
mmu-miR-10b-5p	down	miR
mmu-miR-10b-5p	down	miR
mmu-miR-10b-5p	down	miR
mmu-miR-10b-5p	down	miR
mmu-miR-10b-5p	down	miR
mmu-miR-10b-5p	down	miR
mmu-miR-10b-5p	down	miR
mmu-miR-10b-5p	down	miR
mmu-miR-10b-5p	down	miR
mmu-miR-10b-5p	down	miR
mmu-miR-1298-5p	down	miR
mmu-miR-1298-5p	down	miR
mmu-miR-1298-5p	down	miR
mmu-miR-1298-5p	down	miR
mmu-miR-1298-5p	down	miR
mmu-miR-1298-5p	down	miR
mmu-miR-1298-5p	down	miR
mmu-miR-1298-5p	down	miR
mmu-miR-1298-5p	down	miR
mmu-miR-1298-5p	down	miR
mmu-miR-1298-5p	down	miR
mmu-miR-1298-5p	down	miR
mmu-miR-1298-5p	down	miR
mmu-miR-1298-5p	down	miR
mmu-miR-1298-5p	down	miR
mmu-miR-1298-5p	down	miR
mmu-miR-133a-3p	down	miR
mmu-miR-133a-3p	down	miR
mmu-miR-133a-3p	down	miR
mmu-miR-133a-3p	down	miR
mmu-miR-133a-3p	down	miR
mmu-miR-133a-3p	down	miR
mmu-miR-133a-3p	down	miR
mmu-miR-133a-3p	down	miR
mmu-miR-133a-3p	down	miR
mmu-miR-133a-3p	down	miR
mmu-miR-133a-3p	down	miR
mmu-miR-133a-3p	down	miR
mmu-miR-133a-3p	down	miR
mmu-miR-133a-3p	down	miR
mmu-miR-133a-3p	down	miR
mmu-miR-133a-3p	down	miR
mmu-miR-133a-3p	down	miR
mmu-miR-133a-3p	down	miR
mmu-miR-133a-3p	down	miR
mmu-miR-133a-3p	down	miR
mmu-miR-133a-3p	down	miR
mmu-miR-133a-3p	down	miR
mmu-miR-133a-3p	down	miR
mmu-miR-136-3p	down	miR
mmu-miR-136-3p	down	miR
mmu-miR-136-3p	down	miR
mmu-miR-136-3p	down	miR
mmu-miR-136-3p	down	miR
mmu-miR-136-3p	down	miR
mmu-miR-136-3p	down	miR
mmu-miR-136-3p	down	miR
mmu-miR-136-3p	down	miR
mmu-miR-136-3p	down	miR
mmu-miR-136-3p	down	miR
mmu-miR-136-3p	down	miR
mmu-miR-136-3p	down	miR
mmu-miR-136-3p	down	miR
mmu-miR-136-3p	down	miR
mmu-miR-136-3p	down	miR
mmu-miR-136-3p	down	miR
mmu-miR-136-3p	down	miR
mmu-miR-136-3p	down	miR
mmu-miR-136-3p	down	miR
mmu-miR-136-3p	down	miR
mmu-miR-16-5p	down	miR
mmu-miR-16-5p	down	miR
mmu-miR-16-5p	down	miR
mmu-miR-16-5p	down	miR
mmu-miR-16-5p	down	miR
mmu-miR-16-5p	down	miR
mmu-miR-16-5p	down	miR
mmu-miR-16-5p	down	miR
mmu-miR-16-5p	down	miR
mmu-miR-16-5p	down	miR
mmu-miR-16-5p	down	miR
mmu-miR-16-5p	down	miR
mmu-miR-16-5p	down	miR
mmu-miR-16-5p	down	miR
mmu-miR-16-5p	down	miR
mmu-miR-16-5p	down	miR
mmu-miR-16-5p	down	miR
mmu-miR-16-5p	down	miR
mmu-miR-16-5p	down	miR
mmu-miR-16-5p	down	miR
mmu-miR-16-5p	down	miR
mmu-miR-16-5p	down	miR
mmu-miR-16-5p	down	miR
mmu-miR-16-5p	down	miR
mmu-miR-16-5p	down	miR
mmu-miR-16-5p	down	miR
mmu-miR-16-5p	down	miR
mmu-miR-16-5p	down	miR
mmu-miR-16-5p	down	miR
mmu-miR-16-5p	down	miR
mmu-miR-1912-3p	down	miR
mmu-miR-1912-3p	down	miR
mmu-miR-1912-3p	down	miR
mmu-miR-1912-3p	down	miR
mmu-miR-1912-3p	down	miR
mmu-miR-1912-3p	down	miR
mmu-miR-1912-3p	down	miR
mmu-miR-1912-3p	down	miR
mmu-miR-1912-3p	down	miR
mmu-miR-1912-3p	down	miR
mmu-miR-1912-3p	down	miR
mmu-miR-1912-3p	down	miR
mmu-miR-1912-3p	down	miR
mmu-miR-1912-3p	down	miR
mmu-miR-1912-3p	down	miR
mmu-miR-1912-3p	down	miR
mmu-miR-1912-3p	down	miR
mmu-miR-1912-3p	down	miR
mmu-miR-1912-3p	down	miR
mmu-miR-1912-3p	down	miR
mmu-miR-1912-3p	down	miR
mmu-miR-1912-3p	down	miR
mmu-miR-1912-3p	down	miR
mmu-miR-1912-3p	down	miR
mmu-miR-1912-3p	down	miR
mmu-miR-1912-3p	down	miR
mmu-miR-1912-3p	down	miR
mmu-miR-1912-3p	down	miR
mmu-miR-1912-3p	down	miR
mmu-miR-1970c-5p	down	miR
mmu-miR-1970c-5p	down	miR
mmu-miR-1970c-5p	down	miR
mmu-miR-1970c-5p	down	miR
mmu-miR-1970c-5p	down	miR
mmu-miR-1970c-5p	down	miR
mmu-miR-1970c-5p	down	miR
mmu-miR-1970c-5p	down	miR
mmu-miR-1970c-5p	down	miR
mmu-miR-1970c-5p	down	miR
mmu-miR-1970c-5p	down	miR
mmu-miR-1970c-5p	down	miR
mmu-miR-1970c-5p	down	miR
mmu-miR-1970c-5p	down	miR
mmu-miR-1970c-5p	down	miR
mmu-miR-1970c-5p	down	miR
mmu-miR-1970c-5p	down	miR
mmu-miR-1970c-5p	down	miR
mmu-miR-1970c-5p	down	miR
mmu-miR-1970c-5p	down	miR
mmu-miR-1970c-5p	down	miR
mmu-miR-1970c-5p	down	miR
mmu-miR-1970c-5p	down	miR
mmu-miR-1970c-5p	down	miR
mmu-miR-1970c-5p	down	miR
mmu-miR-1970c-5p	down	miR
mmu-miR-1970c-5p	down	miR
mmu-miR-204-5p	down	miR
mmu-miR-204-5p	down	miR
mmu-miR-204-5p	down	miR
mmu-miR-204-5p	down	miR
mmu-miR-204-5p	down	miR
mmu-miR-204-5p	down	miR
mmu-miR-204-5p	down	miR
mmu-miR-204-5p	down	miR
mmu-miR-204-5p	down	miR
mmu-miR-204-5p	down	miR
mmu-miR-204-5p	down	miR
mmu-miR-204-5p	down	miR
mmu-miR-204-5p	down	miR
mmu-miR-204-5p	down	miR
mmu-miR-204-5p	down	miR
mmu-miR-204-5p	down	miR
mmu-miR-204-5p	down	miR
mmu-miR-204-5p	down	miR
mmu-miR-204-5p	down	miR
mmu-miR-204-5p	down	miR
mmu-miR-204-5p	down	miR
mmu-miR-204-5p	down	miR
mmu-miR-204-5p	down	miR
mmu-miR-204-5p	down	miR
mmu-miR-204-5p	down	miR
mmu-miR-204-5p	down	miR
mmu-miR-204-5p	down	miR
mmu-miR-204-5p	down	miR
mmu-miR-204-5p	down	miR
mmu-miR-29b-3p	down	miR
mmu-miR-29b-3p	down	miR
mmu-miR-29b-3p	down	miR
mmu-miR-29b-3p	down	miR
mmu-miR-29b-3p	down	miR
mmu-miR-29b-3p	down	miR
mmu-miR-29b-3p	down	miR
mmu-miR-29b-3p	down	miR
mmu-miR-29b-3p	down	miR
mmu-miR-29b-3p	down	miR
mmu-miR-29b-3p	down	miR
mmu-miR-29b-3p	down	miR
mmu-miR-29b-3p	down	miR
mmu-miR-29b-3p	down	miR
mmu-miR-29b-3p	down	miR
mmu-miR-29b-3p	down	miR
mmu-miR-29b-3p	down	miR
mmu-miR-29b-3p	down	miR
mmu-miR-29b-3p	down	miR
mmu-miR-29b-3p	down	miR
mmu-miR-29b-3p	down	miR
mmu-miR-29b-3p	down	miR
mmu-miR-29b-3p	down	miR
mmu-miR-29b-3p	down	miR
mmu-miR-29b-3p	down	miR
mmu-miR-29b-3p	down	miR
mmu-miR-29b-3p	down	miR
mmu-miR-29b-3p	down	miR
mmu-miR-29b-3p	down	miR
mmu-miR-29b-3p	down	miR
mmu-miR-29c-3p	down	miR
mmu-miR-29c-3p	down	miR
mmu-miR-29c-3p	down	miR
mmu-miR-29c-3p	down	miR
mmu-miR-29c-3p	down	miR
mmu-miR-29c-3p	down	miR
mmu-miR-29c-3p	down	miR
mmu-miR-29c-3p	down	miR
mmu-miR-29c-3p	down	miR
mmu-miR-29c-3p	down	miR
mmu-miR-29c-3p	down	miR
mmu-miR-29c-3p	down	miR
mmu-miR-29c-3p	down	miR
mmu-miR-29c-3p	down	miR
mmu-miR-29c-3p	down	miR
mmu-miR-29c-3p	down	miR
mmu-miR-29c-3p	down	miR
mmu-miR-29c-3p	down	miR
mmu-miR-29c-3p	down	miR
mmu-miR-29c-3p	down	miR
mmu-miR-29c-3p	down	miR
mmu-miR-29c-3p	down	miR
mmu-miR-29c-3p	down	miR
mmu-miR-29c-3p	down	miR
mmu-miR-29c-3p	down	miR
mmu-miR-29c-3p	down	miR
mmu-miR-29c-3p	down	miR
mmu-miR-29c-3p	down	miR
mmu-miR-29c-3p	down	miR
mmu-miR-29c-3p	down	miR
mmu-miR-301a-3p	down	miR
mmu-miR-301a-3p	down	miR
mmu-miR-301a-3p	down	miR
mmu-miR-301a-3p	down	miR
mmu-miR-301a-3p	down	miR
mmu-miR-301a-3p	down	miR
mmu-miR-301a-3p	down	miR
mmu-miR-301a-3p	down	miR
mmu-miR-301a-3p	down	miR
mmu-miR-301a-3p	down	miR
mmu-miR-301a-3p	down	miR
mmu-miR-301a-3p	down	miR
mmu-miR-301a-3p	down	miR
mmu-miR-301a-3p	down	miR
mmu-miR-301a-3p	down	miR
mmu-miR-301a-3p	down	miR
mmu-miR-301a-3p	down	miR
mmu-miR-301a-3p	down	miR
mmu-miR-301a-3p	down	miR
mmu-miR-301a-3p	down	miR
mmu-miR-301a-3p	down	miR
mmu-miR-301a-3p	down	miR
mmu-miR-301a-3p	down	miR
mmu-miR-301a-3p	down	miR
mmu-miR-3065-5p	down	miR
mmu-miR-3065-5p	down	miR
mmu-miR-3065-5p	down	miR
mmu-miR-3065-5p	down	miR
mmu-miR-3065-5p	down	miR
mmu-miR-3065-5p	down	miR
mmu-miR-3065-5p	down	miR
mmu-miR-3065-5p	down	miR
mmu-miR-3065-5p	down	miR
mmu-miR-3065-5p	down	miR
mmu-miR-3065-5p	down	miR
mmu-miR-3065-5p	down	miR
mmu-miR-3065-5p	down	miR
mmu-miR-3065-5p	down	miR
mmu-miR-3065-5p	down	miR
mmu-miR-3065-5p	down	miR
mmu-miR-3065-5p	down	miR
mmu-miR-3065-5p	down	miR
mmu-miR-3065-5p	down	miR
mmu-miR-3065-5p	down	miR
mmu-miR-3065-5p	down	miR
mmu-miR-3065-5p	down	miR
mmu-miR-3065-5p	down	miR
mmu-miR-3065-5p	down	miR
mmu-miR-3065-5p	down	miR
mmu-miR-3065-5p	down	miR
mmu-miR-3065-5p	down	miR
mmu-miR-3065-5p	down	miR
mmu-miR-3065-5p	down	miR
mmu-miR-3065-5p	down	miR
mmu-miR-3071-5p	down	miR
mmu-miR-3071-5p	down	miR
mmu-miR-3071-5p	down	miR
mmu-miR-3071-5p	down	miR
mmu-miR-3071-5p	down	miR
mmu-miR-3071-5p	down	miR
mmu-miR-3071-5p	down	miR
mmu-miR-3071-5p	down	miR
mmu-miR-3071-5p	down	miR
mmu-miR-3071-5p	down	miR
mmu-miR-3071-5p	down	miR
mmu-miR-3071-5p	down	miR
mmu-miR-3071-5p	down	miR
mmu-miR-3071-5p	down	miR
mmu-miR-3071-5p	down	miR
mmu-miR-3071-5p	down	miR
mmu-miR-3071-5p	down	miR
mmu-miR-3071-5p	down	miR
mmu-miR-3071-5p	down	miR
mmu-miR-3071-5p	down	miR
mmu-miR-3071-5p	down	miR
mmu-miR-3071-5p	down	miR
mmu-miR-3071-5p	down	miR
mmu-miR-3071-5p	down	miR
mmu-miR-3071-5p	down	miR
mmu-miR-30e-5p	down	miR
mmu-miR-30e-5p	down	miR
mmu-miR-30e-5p	down	miR
mmu-miR-30e-5p	down	miR
mmu-miR-30e-5p	down	miR
mmu-miR-30e-5p	down	miR
mmu-miR-30e-5p	down	miR
mmu-miR-30e-5p	down	miR
mmu-miR-30e-5p	down	miR
mmu-miR-30e-5p	down	miR
mmu-miR-30e-5p	down	miR
mmu-miR-30e-5p	down	miR
mmu-miR-30e-5p	down	miR
mmu-miR-30e-5p	down	miR
mmu-miR-30e-5p	down	miR
mmu-miR-30e-5p	down	miR
mmu-miR-30e-5p	down	miR
mmu-miR-30e-5p	down	miR
mmu-miR-30e-5p	down	miR
mmu-miR-30e-5p	down	miR
mmu-miR-30e-5p	down	miR
mmu-miR-30e-5p	down	miR
mmu-miR-30e-5p	down	miR
mmu-miR-30e-5p	down	miR
mmu-miR-30e-5p	down	miR
mmu-miR-30e-5p	down	miR
mmu-miR-338-3p	down	miR
mmu-miR-338-3p	down	miR
mmu-miR-338-3p	down	miR
mmu-miR-338-3p	down	miR
mmu-miR-338-3p	down	miR
mmu-miR-338-3p	down	miR
mmu-miR-338-3p	down	miR
mmu-miR-338-3p	down	miR
mmu-miR-338-3p	down	miR
mmu-miR-338-3p	down	miR
mmu-miR-338-3p	down	miR
mmu-miR-338-3p	down	miR
mmu-miR-338-3p	down	miR
mmu-miR-338-3p	down	miR
mmu-miR-338-3p	down	miR
mmu-miR-338-3p	down	miR
mmu-miR-338-3p	down	miR
mmu-miR-338-3p	down	miR
mmu-miR-338-3p	down	miR
mmu-miR-338-3p	down	miR
mmu-miR-338-3p	down	miR
mmu-miR-338-3p	down	miR
mmu-miR-338-3p	down	miR
mmu-miR-338-3p	down	miR
mmu-miR-338-3p	down	miR
mmu-miR-338-3p	down	miR
mmu-miR-338-3p	down	miR
mmu-miR-338-3p	down	miR
mmu-miR-340-5p	down	miR
mmu-miR-340-5p	down	miR
mmu-miR-340-5p	down	miR
mmu-miR-340-5p	down	miR
mmu-miR-340-5p	down	miR
mmu-miR-340-5p	down	miR
mmu-miR-340-5p	down	miR
mmu-miR-340-5p	down	miR
mmu-miR-340-5p	down	miR
mmu-miR-340-5p	down	miR
mmu-miR-340-5p	down	miR
mmu-miR-340-5p	down	miR
mmu-miR-340-5p	down	miR
mmu-miR-340-5p	down	miR
mmu-miR-340-5p	down	miR
mmu-miR-340-5p	down	miR
mmu-miR-340-5p	down	miR
mmu-miR-340-5p	down	miR
mmu-miR-34b-5p	down	miR
mmu-miR-34b-5p	down	miR
mmu-miR-34b-5p	down	miR
mmu-miR-34b-5p	down	miR
mmu-miR-34b-5p	down	miR
mmu-miR-34b-5p	down	miR
mmu-miR-34b-5p	down	miR
mmu-miR-34b-5p	down	miR
mmu-miR-34b-5p	down	miR
mmu-miR-34b-5p	down	miR
mmu-miR-34b-5p	down	miR
mmu-miR-34b-5p	down	miR
mmu-miR-34b-5p	down	miR
mmu-miR-34b-5p	down	miR
mmu-miR-34b-5p	down	miR
mmu-miR-34b-5p	down	miR
mmu-miR-34b-5p	down	miR
mmu-miR-34b-5p	down	miR
mmu-miR-34b-5p	down	miR
mmu-miR-34b-5p	down	miR
mmu-miR-34b-5p	down	miR
mmu-miR-34b-5p	down	miR
mmu-miR-34b-5p	down	miR
mmu-miR-34b-5p	down	miR
mmu-miR-34b-5p	down	miR
mmu-miR-34b-5p	down	miR
mmu-miR-34b-5p	down	miR
mmu-miR-34b-5p	down	miR
mmu-miR-34b-5p	down	miR
mmu-miR-34b-5p	down	miR
mmu-miR-34c-5p	down	miR
mmu-miR-34c-5p	down	miR
mmu-miR-34c-5p	down	miR
mmu-miR-34c-5p	down	miR
mmu-miR-34c-5p	down	miR
mmu-miR-34c-5p	down	miR
mmu-miR-34c-5p	down	miR
mmu-miR-34c-5p	down	miR
mmu-miR-34c-5p	down	miR
mmu-miR-34c-5p	down	miR
mmu-miR-34c-5p	down	miR
mmu-miR-34c-5p	down	miR
mmu-miR-34c-5p	down	miR
mmu-miR-34c-5p	down	miR
mmu-miR-34c-5p	down	miR
mmu-miR-34c-5p	down	miR
mmu-miR-34c-5p	down	miR
mmu-miR-34c-5p	down	miR
mmu-miR-34c-5p	down	miR
mmu-miR-34c-5p	down	miR
mmu-miR-34c-5p	down	miR
mmu-miR-34c-5p	down	miR
mmu-miR-34c-5p	down	miR
mmu-miR-34c-5p	down	miR
mmu-miR-34c-5p	down	miR
mmu-miR-34c-5p	down	miR
mmu-miR-34c-5p	down	miR
mmu-miR-34c-5p	down	miR
mmu-miR-34c-5p	down	miR
mmu-miR-34c-5p	down	miR
mmu-miR-376a-3p	down	miR
mmu-miR-376a-3p	down	miR
mmu-miR-376a-3p	down	miR
mmu-miR-376a-3p	down	miR
mmu-miR-376a-3p	down	miR
mmu-miR-376a-3p	down	miR
mmu-miR-376a-3p	down	miR
mmu-miR-376a-3p	down	miR
mmu-miR-376a-3p	down	miR
mmu-miR-376a-3p	down	miR
mmu-miR-376a-3p	down	miR
mmu-miR-376a-3p	down	miR
mmu-miR-376a-3p	down	miR
mmu-miR-376a-3p	down	miR
mmu-miR-376a-3p	down	miR
mmu-miR-376a-3p	down	miR
mmu-miR-448-3p	down	miR
mmu-miR-448-3p	down	miR
mmu-miR-448-3p	down	miR
mmu-miR-448-3p	down	miR
mmu-miR-448-3p	down	miR
mmu-miR-448-3p	down	miR
mmu-miR-448-3p	down	miR
mmu-miR-448-3p	down	miR
mmu-miR-448-3p	down	miR
mmu-miR-448-3p	down	miR
mmu-miR-448-3p	down	miR
mmu-miR-448-3p	down	miR
mmu-miR-448-3p	down	miR
mmu-miR-448-3p	down	miR
mmu-miR-448-3p	down	miR
mmu-miR-448-3p	down	miR
mmu-miR-448-3p	down	miR
mmu-miR-448-3p	down	miR
mmu-miR-448-3p	down	miR
mmu-miR-448-3p	down	miR
mmu-miR-448-3p	down	miR
mmu-miR-448-3p	down	miR
mmu-miR-448-3p	down	miR
mmu-miR-448-3p	down	miR
mmu-miR-448-3p	down	miR
mmu-miR-466b-5p	down	miR
mmu-miR-466b-5p	down	miR
mmu-miR-466b-5p	down	miR
mmu-miR-466b-5p	down	miR
mmu-miR-466b-5p	down	miR
mmu-miR-466b-5p	down	miR
mmu-miR-466b-5p	down	miR
mmu-miR-466b-5p	down	miR
mmu-miR-466b-5p	down	miR
mmu-miR-466b-5p	down	miR
mmu-miR-466b-5p	down	miR
mmu-miR-466b-5p	down	miR
mmu-miR-466b-5p	down	miR
mmu-miR-466b-5p	down	miR
mmu-miR-466b-5p	down	miR
mmu-miR-466b-5p	down	miR
mmu-miR-466b-5p	down	miR
mmu-miR-466b-5p	down	miR
mmu-miR-466b-5p	down	miR
mmu-miR-466b-5p	down	miR
mmu-miR-466b-5p	down	miR
mmu-miR-466b-5p	down	miR
mmu-miR-466b-5p	down	miR
mmu-miR-466b-5p	down	miR
mmu-miR-466b-5p	down	miR
mmu-miR-466b-5p	down	miR
mmu-miR-466b-5p	down	miR
mmu-miR-466b-5p	down	miR
mmu-miR-466b-5p	down	miR
mmu-miR-466b-5p	down	miR
mmu-miR-491-3p	down	miR
mmu-miR-491-3p	down	miR
mmu-miR-491-3p	down	miR
mmu-miR-491-3p	down	miR
mmu-miR-491-3p	down	miR
mmu-miR-491-3p	down	miR
mmu-miR-491-3p	down	miR
mmu-miR-491-3p	down	miR
mmu-miR-491-3p	down	miR
mmu-miR-491-3p	down	miR
mmu-miR-491-3p	down	miR
mmu-miR-491-3p	down	miR
mmu-miR-491-3p	down	miR
mmu-miR-491-3p	down	miR
mmu-miR-491-3p	down	miR
mmu-miR-491-3p	down	miR
mmu-miR-491-3p	down	miR
mmu-miR-491-3p	down	miR
mmu-miR-491-3p	down	miR
mmu-miR-491-3p	down	miR
mmu-miR-491-3p	down	miR
mmu-miR-491-3p	down	miR
mmu-miR-491-3p	down	miR
mmu-miR-491-5p	down	miR
mmu-miR-491-5p	down	miR
mmu-miR-491-5p	down	miR
mmu-miR-491-5p	down	miR
mmu-miR-491-5p	down	miR
mmu-miR-491-5p	down	miR
mmu-miR-491-5p	down	miR
mmu-miR-491-5p	down	miR
mmu-miR-491-5p	down	miR
mmu-miR-491-5p	down	miR
mmu-miR-491-5p	down	miR
mmu-miR-491-5p	down	miR
mmu-miR-491-5p	down	miR
mmu-miR-491-5p	down	miR
mmu-miR-491-5p	down	miR
mmu-miR-491-5p	down	miR
mmu-miR-491-5p	down	miR
mmu-miR-491-5p	down	miR
mmu-miR-491-5p	down	miR
mmu-miR-491-5p	down	miR
mmu-miR-491-5p	down	miR
mmu-miR-491-5p	down	miR
mmu-miR-491-5p	down	miR
mmu-miR-491-5p	down	miR
mmu-miR-491-5p	down	miR
mmu-miR-491-5p	down	miR
mmu-miR-491-5p	down	miR
mmu-miR-491-5p	down	miR
mmu-miR-491-5p	down	miR
mmu-miR-491-5p	down	miR
mmu-miR-499-5p	down	miR
mmu-miR-499-5p	down	miR
mmu-miR-499-5p	down	miR
mmu-miR-499-5p	down	miR
mmu-miR-499-5p	down	miR
mmu-miR-499-5p	down	miR
mmu-miR-499-5p	down	miR
mmu-miR-499-5p	down	miR
mmu-miR-499-5p	down	miR
mmu-miR-499-5p	down	miR
mmu-miR-499-5p	down	miR
mmu-miR-499-5p	down	miR
mmu-miR-499-5p	down	miR
mmu-miR-499-5p	down	miR
mmu-miR-499-5p	down	miR
mmu-miR-499-5p	down	miR
mmu-miR-499-5p	down	miR
mmu-miR-499-5p	down	miR
mmu-miR-499-5p	down	miR
mmu-miR-99a-3p	down	miR
mmu-miR-99a-3p	down	miR
mmu-miR-99a-3p	down	miR
mmu-miR-99a-3p	down	miR
mmu-miR-99a-3p	down	miR
mmu-miR-99a-3p	down	miR
mmu-miR-99a-3p	down	miR
mmu-miR-99a-3p	down	miR
mmu-miR-99a-3p	down	miR
mmu-miR-99a-3p	down	miR
mmu-miR-99a-3p	down	miR
mmu-miR-99a-3p	down	miR
mmu-miR-99a-3p	down	miR
mmu-miR-99a-3p	down	miR
mmu-miR-99a-3p	down	miR
mmu-miR-99a-3p	down	miR
mmu-miR-99a-3p	down	miR
mmu-miR-99a-3p	down	miR
mmu-miR-99a-3p	down	miR
mmu-miR-99a-3p	down	miR
mmu-miR-99a-3p	down	miR
mmu-miR-99a-3p	down	miR
