# Supplementary material for: Identifying lncRNA–miRNA–mRNA networks to investigate Alzheimer’s disease pathogenesis and therapy strategy
Source: Aging (Albany NY). 2020 Feb 7;12(3):2897–920. doi: 10.18632/aging.102785 (PMC7041741; doi:10.18632/aging.102785)
Supplement: Supplementary Table 10 [file aging-12-102785-s003..xlsx]

## Sheet: node
Supplementary Table S10. Nodes interactions in the 6no9yes group
mmu-miR-30f	Drp2
mmu-miR-363-3p	Myo18a
mmu-miR-7004-5p	Myo18a
mmu-miR-24-3p	Trmt1
mmu-miR-3081-3p	Trmt1
mmu-miR-379-5p	Ift46
mmu-miR-6989-3p	Celf2
mmu-miR-330-5p	Btbd6
mmu-miR-363-3p	Btbd6
mmu-miR-467a-5p	Cd36
mmu-miR-187-3p	Ddr1
mmu-miR-363-3p	Ddr1
mmu-miR-7004-5p	Ddr1
mmu-miR-211-5p	Rad23a
mmu-miR-467a-5p	Pde1c
mmu-miR-6989-3p	Pde1c
mmu-miR-126a-3p	Pex5
mmu-miR-12194-3p	Kctd20
mmu-miR-411-3p	Tpr
mmu-miR-187-3p	Ggt1
mmu-miR-210-3p	Prrg2
mmu-miR-30f	Arid1a
mmu-miR-30f	Elavl2
mmu-miR-330-5p	Nfib
mmu-miR-363-3p	Nfib
mmu-miR-149-5p	Rps15a
mmu-miR-379-5p	Rps15a
mmu-miR-187-3p	Tnpo1
mmu-miR-7004-5p	Tnpo1
mmu-miR-467a-5p	Rnmt
mmu-miR-6989-3p	Rnmt
mmu-miR-467b-5p	Dhdds
mmu-miR-467a-5p	Etv5
mmu-miR-6989-3p	Etv5
mmu-miR-99b-3p	Bicc1
mmu-miR-6989-3p	Tbp
mmu-miR-126a-3p	Unkl
mmu-miR-134-3p	Hmgb3
mmu-miR-99b-3p	Tenm1
mmu-miR-211-5p	Kcnq2
mmu-miR-411-3p	Kcnq2
mmu-miR-12194-3p	Slc35c2
mmu-miR-149-5p	Afmid
mmu-miR-379-5p	Afmid
mmu-miR-3074-5p	Med1
mmu-miR-666-5p	Med1
mmu-miR-149-5p	43716
mmu-miR-379-5p	43716
mmu-miR-24-3p	Ncor1
mmu-miR-3081-3p	Ncor1
mmu-miR-3470a	Lhx9
mmu-miR-679-5p	Lhx9
mmu-miR-24-3p	Mgat4c
mmu-miR-3081-3p	Mgat4c
mmu-miR-3074-5p	Vps54
mmu-miR-149-5p	Cnot2
mmu-miR-99b-3p	Prmt2
mmu-miR-187-3p	Pus10
mmu-miR-3074-5p	Hnrnpab
mmu-miR-666-5p	Hnrnpab
mmu-miR-1198-5p	Cdkl3
mmu-miR-210-3p	Cdkl3
mmu-miR-126a-3p	Trim11
mmu-miR-134-3p	Cacna1g
mmu-miR-3470a	Akap5
mmu-miR-679-5p	Akap5
mmu-miR-3470a	Vrk1
mmu-miR-679-5p	Vrk1
mmu-miR-3470a	Rgs6
mmu-miR-679-5p	Rgs6
mmu-miR-330-5p	Dpf3
mmu-miR-363-3p	Dpf3
mmu-miR-467b-5p	Trpc7
mmu-miR-1198-5p	Ktn1
mmu-miR-210-3p	Ktn1
mmu-miR-211-5p	Spata13
mmu-miR-411-3p	Spata13
mmu-miR-134-3p	Clu
mmu-miR-24-3p	Bnip3l
mmu-miR-126a-3p	Trp63
mmu-miR-24-3p	Bfar
mmu-miR-3081-3p	Bfar
mmu-miR-24-3p	2610015P09Rik
mmu-miR-211-5p	Zfp148
mmu-miR-211-5p	Itsn1
mmu-miR-149-5p	Donson
mmu-miR-379-5p	Donson
mmu-miR-3470a	Pigx
mmu-miR-679-5p	Pigx
mmu-miR-30f	Myom1
mmu-miR-24-3p	Ralbp1
mmu-miR-3081-3p	Ralbp1
mmu-miR-1198-5p	Nrxn1
mmu-miR-12194-3p	St6gal2
mmu-miR-134-3p	St6gal2
mmu-miR-467a-5p	Sox8
mmu-miR-6989-3p	Sox8
mmu-miR-330-5p	Zfp523
mmu-miR-187-3p	Mapre2
mmu-miR-7004-5p	Mapre2
mmu-miR-3074-5p	Sncaip
mmu-miR-666-5p	Sncaip
mmu-miR-1198-5p	Megf10
mmu-miR-3470a	Ehbp1l1
mmu-miR-679-5p	Ehbp1l1
mmu-miR-126a-3p	Mark2
mmu-miR-679-5p	Col7a1
mmu-miR-467b-5p	Arhgef9
mmu-miR-379-5p	Plk4
mmu-miR-330-5p	Unc5a
mmu-miR-7004-5p	Unc5a
mmu-miR-24-3p	Slco5a1
mmu-miR-3081-3p	Slco5a1
mmu-miR-330-5p	Mob4
mmu-miR-363-3p	Mob4
mmu-miR-3081-3p	Rhbdd1
mmu-miR-3074-5p	Steap3
mmu-miR-666-5p	Steap3
mmu-miR-24-3p	Rassf5
mmu-miR-3081-3p	Rassf5
mmu-miR-363-3p	Slc45a3
mmu-miR-7004-5p	Slc45a3
mmu-miR-149-5p	Chit1
mmu-miR-12194-3p	Cyb5r1
mmu-miR-134-3p	Cyb5r1
mmu-miR-187-3p	Lamc2
mmu-miR-24-3p	Adcy10
mmu-miR-3081-3p	Adcy10
mmu-miR-126a-3p	Sele
mmu-miR-3074-5p	Astn1
mmu-miR-666-5p	Astn1
mmu-miR-467a-5p	Suv39h2
mmu-miR-6989-3p	Suv39h2
mmu-miR-187-3p	Fcgr2b
mmu-miR-7004-5p	Fcgr2b
mmu-miR-1198-5p	Pter
mmu-miR-210-3p	Pter
mmu-miR-1198-5p	Fam188a
mmu-miR-210-3p	Fam188a
mmu-miR-467b-5p	Psd4
mmu-miR-211-5p	B230118H07Rik
mmu-miR-411-3p	B230118H07Rik
mmu-miR-666-5p	Slx4ip
mmu-miR-467a-5p	Mtch2
mmu-miR-1198-5p	Atp9a
mmu-miR-24-3p	Zgpat
mmu-miR-3081-3p	Zgpat
mmu-miR-467b-5p	Skil
mmu-miR-99b-3p	Ints3
mmu-miR-30f	Tpm3
mmu-miR-3470a	Gstcd
mmu-miR-679-5p	Gstcd
mmu-miR-3074-5p	Dclk2
mmu-miR-666-5p	Dclk2
mmu-miR-3470a	Tars2
mmu-miR-679-5p	Tars2
mmu-miR-467b-5p	Tspan5
mmu-miR-3470a	Ccne2
mmu-miR-679-5p	Ccne2
mmu-miR-330-5p	Rnf11
mmu-miR-363-3p	Rnf11
mmu-miR-99b-3p	Nfia
mmu-miR-210-3p	Espn
mmu-miR-126a-3p	Add1
mmu-miR-126a-3p	Spata18
mmu-miR-187-3p	Mtf2
mmu-miR-7004-5p	Mtf2
mmu-miR-7004-5p	Ddx55
mmu-miR-1198-5p	Brap
mmu-miR-187-3p	Sirt4
mmu-miR-330-5p	Sirt4
mmu-miR-6989-3p	Foxp2
mmu-miR-3470a	Fscn1
mmu-miR-211-5p	Ahcyl2
mmu-miR-24-3p	Lrig1
mmu-miR-3081-3p	Lrig1
mmu-miR-30f	Atf7ip
mmu-miR-149-5p	Apba2
mmu-miR-411-3p	Blm
mmu-miR-187-3p	Cib1
mmu-miR-210-3p	Ttc23
mmu-miR-467a-5p	Sipa1l3
mmu-miR-6989-3p	Sipa1l3
mmu-miR-12194-3p	Stard10
mmu-miR-134-3p	Stard10
mmu-miR-126a-3p	Itgam
mmu-miR-99b-3p	Rnf141
mmu-miR-467a-5p	Porcn
mmu-miR-126a-3p	Ikbkb
mmu-miR-3470a	Sorbs2
mmu-miR-679-5p	Sorbs2
mmu-miR-666-5p	Tecr
mmu-miR-3074-5p	Tfdp2
mmu-miR-666-5p	Tfdp2
mmu-miR-99b-3p	Kif9
mmu-miR-12194-3p	Ephb1
mmu-miR-134-3p	Ephb1
mmu-miR-467b-5p	Dnajc13
mmu-miR-6989-3p	Prkar2a
mmu-miR-6989-3p	Flcn
mmu-miR-30f	Arap1
mmu-miR-467b-5p	Foxj3
mmu-miR-99b-3p	C330027C09Rik
mmu-miR-467a-5p	Lmo7
mmu-miR-6989-3p	Lmo7
mmu-miR-99b-3p	Triobp
mmu-miR-99b-3p	Trappc8
mmu-miR-210-3p	Cacul1
mmu-miR-1198-5p	Apol6
mmu-miR-210-3p	Apol6
mmu-miR-210-3p	St18
mmu-miR-126a-3p	Ephx4
mmu-miR-6989-3p	Ccnd3
mmu-miR-12194-3p	Celf5
mmu-miR-134-3p	Celf5
mmu-miR-3470a	G2e3
mmu-miR-679-5p	G2e3
mmu-miR-3074-5p	Lzts2
mmu-miR-666-5p	Lzts2
mmu-miR-363-3p	Tsen34
mmu-miR-7004-5p	Tsen34
mmu-miR-467a-5p	Hmha1
mmu-miR-149-5p	Cd99l2
mmu-miR-379-5p	Cd99l2
mmu-miR-30f	Fmnl2
mmu-miR-3470a	Igsf10
mmu-miR-679-5p	Igsf10
mmu-miR-30f	C530008M17Rik
mmu-miR-126a-3p	Ehmt1
mmu-miR-3074-5p	Zfp280c
mmu-miR-666-5p	Zfp280c
mmu-miR-149-5p	Zdhhc9
mmu-miR-379-5p	Zdhhc9
mmu-miR-467a-5p	Cfap61
mmu-miR-6989-3p	Cfap61
mmu-miR-30f	Fam193a
mmu-miR-330-5p	4932438A13Rik
mmu-miR-363-3p	4932438A13Rik
mmu-miR-1198-5p	Fbxo27
mmu-miR-30f	Rapgef6
mmu-miR-330-5p	Mynn
mmu-miR-363-3p	Mynn
mmu-miR-211-5p	Limch1
mmu-miR-411-3p	Limch1
mmu-miR-1198-5p	Parp11
mmu-miR-210-3p	Parp11
mmu-miR-210-3p	Lace1
mmu-miR-210-3p	Tbkbp1
mmu-miR-24-3p	Rtel1
mmu-miR-3074-5p	Josd2
mmu-miR-467b-5p	Rbms3
mmu-miR-12194-3p	Endov
mmu-miR-134-3p	Endov
mmu-miR-99b-3p	Timeless
mmu-miR-149-5p	Negr1
mmu-miR-30f	Eml2
mmu-miR-1198-5p	Wdr25
mmu-miR-411-3p	Hectd2
mmu-miR-24-3p	Rap1gap
mmu-miR-3081-3p	Rap1gap
mmu-miR-411-3p	Tardbp
mmu-miR-211-5p	Ccdc64
mmu-miR-30f	Atxn2
mmu-miR-211-5p	Dpy19l1
mmu-miR-411-3p	Dpy19l1
mmu-miR-211-5p	Synpo
mmu-miR-30f	Zfp536
mmu-miR-149-5p	A830080D01Rik
mmu-miR-379-5p	A830080D01Rik
mmu-miR-187-3p	Grsf1
mmu-miR-363-3p	Grsf1
mmu-miR-7004-5p	Grsf1
mmu-miR-126a-3p	Slc38a6
mmu-miR-1198-5p	Napepld
mmu-miR-210-3p	Napepld
mmu-miR-411-3p	Golph3l
mmu-miR-149-5p	Mapk10
mmu-miR-379-5p	Mapk10
mmu-miR-24-3p	Atxn1
mmu-miR-3081-3p	Atxn1
mmu-miR-12194-3p	Trim16
mmu-miR-134-3p	Trim16
mmu-miR-187-3p	Ldlrad3
mmu-miR-7004-5p	Ldlrad3
mmu-miR-3074-5p	Pou4f1
mmu-miR-666-5p	Pou4f1
mmu-miR-211-5p	Nrsn1
mmu-miR-411-3p	Nrsn1
mmu-miR-149-5p	Aftph
mmu-miR-379-5p	Aftph
mmu-miR-187-3p	Lgr4
mmu-miR-330-5p	Lgr4
mmu-miR-7004-5p	Lgr4
mmu-miR-30f	Fbxo46
mmu-miR-126a-3p	Lypd6
mmu-miR-3470a	Fam118b
mmu-miR-679-5p	Fam118b
mmu-miR-99b-3p	Tmem125
mmu-miR-467b-5p	Zbtb22
mmu-miR-467b-5p	Crebzf
mmu-miR-3074-5p	Kcnj16
mmu-miR-666-5p	Kcnj16
mmu-miR-467a-5p	Magi3
mmu-miR-379-5p	Pcdh15
mmu-miR-12194-3p	Traf7
mmu-miR-134-3p	Traf7
mmu-miR-467b-5p	Daw1
mmu-miR-12194-3p	Fgfr3
mmu-miR-134-3p	Fgfr3
mmu-miR-467a-5p	A630033H20Rik
mmu-miR-6989-3p	A630033H20Rik
mmu-miR-149-5p	Zscan22
mmu-miR-379-5p	Zscan22
mmu-miR-12194-3p	4933427D06Rik
mmu-miR-134-3p	4933427D06Rik
mmu-miR-467a-5p	Inca1
mmu-miR-330-5p	Homez
mmu-miR-467b-5p	Sema3b
mmu-miR-411-3p	Phtf1
mmu-miR-1198-5p	Anks1b
mmu-miR-411-3p	Ntrk3
mmu-miR-211-5p	Bcas3
mmu-miR-187-3p	Mbtd1
mmu-miR-330-5p	Mbtd1
mmu-miR-7004-5p	Mbtd1
mmu-miR-211-5p	Ccdc28a
mmu-miR-149-5p	Ntng1
mmu-miR-379-5p	Ntng1
mmu-miR-1198-5p	Caln1
mmu-miR-3081-3p	Tmem219
mmu-miR-210-3p	Agbl4
mmu-miR-99b-3p	Dlgap4
mmu-miR-99b-3p	Kalrn
mmu-miR-12194-3p	Ttr
mmu-miR-467b-5p	Lmtk3
mmu-miR-126a-3p	Kcnma1
mmu-miR-3081-3p	Zfp467
mmu-miR-379-5p	Dazap1
mmu-miR-666-5p	Rgma
mmu-miR-12194-3p	B230216G23Rik
mmu-miR-134-3p	B230216G23Rik
mmu-miR-187-3p	Zfp777
mmu-miR-7004-5p	Zfp777
mmu-miR-330-5p	Foxr2
mmu-miR-363-3p	Foxr2
mmu-miR-3470a	Eif2s2
mmu-miR-679-5p	Eif2s2
mmu-miR-411-3p	Wipf1
mmu-miR-3074-5p	Gm4724
mmu-miR-363-3p	Gm4723
mmu-miR-99b-3p	Cers1
mmu-miR-12194-3p	Palm2Akap2
mmu-miR-134-3p	Palm2Akap2
mmu-miR-3074-5p	Tex9
mmu-miR-666-5p	Tex9
mmu-miR-211-5p	Apol11b
mmu-miR-411-3p	Apol11b
mmu-miR-467b-5p	Gm28049
mmu-miR-330-5p	Gm28048
mmu-miR-363-3p	Gm28048
mmu-miR-149-5p	ENSMUST00000131345.7
mmu-miR-210-3p	ENSMUST00000131345.7
mmu-miR-211-5p	ENSMUST00000131345.7
mmu-miR-330-5p	ENSMUST00000131345.7
mmu-miR-363-3p	ENSMUST00000131345.7
mmu-miR-6989-3p	ENSMUST00000131345.7
mmu-miR-211-5p	ENSMUST00000182656.7
mmu-miR-3074-5p	ENSMUST00000182656.7
mmu-miR-363-3p	ENSMUST00000182656.7
mmu-miR-679-5p	ENSMUST00000199309.4
mmu-miR-6989-3p	ENSMUST00000199309.4
mmu-miR-1198-5p	LNC_000109
mmu-miR-12194-3p	LNC_000109
mmu-miR-1198-5p	LNC_000217
mmu-miR-12194-3p	LNC_000217
mmu-miR-134-3p	LNC_000217
mmu-miR-210-3p	LNC_000217
mmu-miR-24-3p	LNC_000217
mmu-miR-3074-5p	LNC_000217
mmu-miR-3470a	LNC_000217
mmu-miR-363-3p	LNC_000217
mmu-miR-467a-5p	LNC_000217
mmu-miR-679-5p	LNC_000217
mmu-miR-6989-3p	LNC_000217
mmu-miR-24-3p	LNC_000233
mmu-miR-679-5p	LNC_000233
mmu-miR-12194-3p	LNC_000288
mmu-miR-134-3p	LNC_000288
mmu-miR-149-5p	LNC_000288
mmu-miR-211-5p	LNC_000288
mmu-miR-3074-5p	LNC_000288
mmu-miR-3081-3p	LNC_000288
mmu-miR-330-5p	LNC_000288
mmu-miR-679-5p	LNC_000622
mmu-miR-7004-5p	LNC_000622
mmu-miR-330-5p	LNC_000745
mmu-miR-134-3p	LNC_001116
mmu-miR-30f	LNC_001116
mmu-miR-1198-5p	LNC_001213
mmu-miR-211-5p	LNC_001213
mmu-miR-379-5p	LNC_001213
mmu-miR-411-3p	LNC_001213
mmu-miR-6989-3p	LNC_001213
mmu-miR-99b-3p	LNC_001213
mmu-miR-134-3p	LNC_001229
mmu-miR-3470a	LNC_001277
mmu-miR-1198-5p	LNC_001428
mmu-miR-211-5p	LNC_001428
mmu-miR-1198-5p	LNC_001498
mmu-miR-134-3p	LNC_001498
mmu-miR-149-5p	LNC_001498
mmu-miR-24-3p	LNC_001498
mmu-miR-3074-5p	LNC_001498
mmu-miR-3470a	LNC_001498
mmu-miR-679-5p	LNC_001498
mmu-miR-134-3p	LNC_001502
mmu-miR-149-5p	LNC_001502
mmu-miR-24-3p	LNC_001502
mmu-miR-3470a	LNC_001502
mmu-miR-679-5p	LNC_001502
mmu-miR-149-5p	LNC_001661
mmu-miR-211-5p	LNC_001661
mmu-miR-330-5p	LNC_001661
mmu-miR-1198-5p	LNC_001818
mmu-miR-12194-3p	LNC_001818
mmu-miR-149-5p	LNC_001818
mmu-miR-3074-5p	LNC_001818
mmu-miR-330-5p	LNC_001818
mmu-miR-3470a	LNC_001818
mmu-miR-679-5p	LNC_001818
mmu-miR-330-5p	LNC_001946
mmu-miR-679-5p	LNC_002144
mmu-miR-126a-3p	LNC_002373
mmu-miR-187-3p	LNC_002373
mmu-miR-211-5p	LNC_002373
mmu-miR-330-5p	LNC_002373
mmu-miR-679-5p	LNC_002373
mmu-miR-12194-3p	LNC_002387
mmu-miR-134-3p	LNC_002387
mmu-miR-149-5p	LNC_002387
mmu-miR-187-3p	LNC_002387
mmu-miR-210-3p	LNC_002387
mmu-miR-24-3p	LNC_002387
mmu-miR-3074-5p	LNC_002387
mmu-miR-30f	LNC_002387
mmu-miR-411-3p	LNC_002387
mmu-miR-467a-5p	LNC_002387
mmu-miR-666-5p	LNC_002387
mmu-miR-12194-3p	LNC_002400
mmu-miR-24-3p	LNC_002400
mmu-miR-3074-5p	LNC_002400
mmu-miR-330-5p	LNC_002400
mmu-miR-3470a	LNC_002400
mmu-miR-379-5p	LNC_002400
mmu-miR-12194-3p	LNC_002451
mmu-miR-134-3p	LNC_002451
mmu-miR-149-5p	LNC_002451
mmu-miR-24-3p	LNC_002451
mmu-miR-3470a	LNC_002451
mmu-miR-679-5p	LNC_002451
mmu-miR-210-3p	LNC_002555
mmu-miR-134-3p	LNC_002620
mmu-miR-211-5p	LNC_002620
mmu-miR-679-5p	LNC_002620
mmu-miR-24-3p	LNC_003096
mmu-miR-30f	LNC_003096
mmu-miR-12194-3p	LNC_003118
mmu-miR-134-3p	LNC_003118
mmu-miR-24-3p	LNC_003118
mmu-miR-3074-5p	LNC_003118
mmu-miR-411-3p	LNC_003118
mmu-miR-666-5p	LNC_003118
mmu-miR-12194-3p	LNC_003119
mmu-miR-134-3p	LNC_003119
mmu-miR-30f	LNC_003119
mmu-miR-24-3p	LNC_003369
mmu-miR-3470a	LNC_003369
mmu-miR-411-3p	LNC_003369
mmu-miR-467a-5p	LNC_003541
mmu-miR-6989-3p	LNC_003541
mmu-miR-24-3p	LNC_003659
mmu-miR-30f	LNC_003659
mmu-miR-1198-5p	LNC_003731
mmu-miR-24-3p	LNC_003801
mmu-miR-3074-5p	LNC_003801
mmu-miR-187-3p	LNC_003852
mmu-miR-363-3p	LNC_003852
mmu-miR-467a-5p	LNC_003852
mmu-miR-467b-5p	LNC_003852
mmu-miR-679-5p	LNC_003852
mmu-miR-7004-5p	LNC_003852
mmu-miR-99b-3p	LNC_003852
mmu-miR-24-3p	LNC_004298
mmu-miR-666-5p	LNC_004298
mmu-miR-1198-5p	LNC_004317
mmu-miR-12194-3p	LNC_004317
mmu-miR-134-3p	LNC_004317
mmu-miR-187-3p	LNC_004317
mmu-miR-3470a	LNC_004317
mmu-miR-679-5p	LNC_004317
mmu-miR-330-5p	LNC_004456
mmu-miR-30f	LNC_004471
mmu-miR-3470a	LNC_004474
mmu-miR-467a-5p	LNC_004474
mmu-miR-12194-3p	LNC_004718
mmu-miR-7004-5p	LNC_004718
mmu-miR-134-3p	LNC_005067
mmu-miR-149-5p	LNC_005067
mmu-miR-211-5p	LNC_005067
mmu-miR-3074-5p	LNC_005067
mmu-miR-330-5p	LNC_005067
mmu-miR-411-3p	LNC_005067
mmu-miR-6989-3p	LNC_005067
mmu-miR-7004-5p	LNC_005067
mmu-miR-12194-3p	LNC_005072
mmu-miR-149-5p	LNC_005072
mmu-miR-211-5p	LNC_005072
mmu-miR-3074-5p	LNC_005072
mmu-miR-330-5p	LNC_005072
mmu-miR-363-3p	LNC_005072
mmu-miR-467a-5p	LNC_005072
mmu-miR-467b-5p	LNC_005072
mmu-miR-679-5p	LNC_005072
mmu-miR-1198-5p	LNC_005327
mmu-miR-149-5p	LNC_005327
mmu-miR-211-5p	LNC_005327
mmu-miR-1198-5p	LNC_005371
mmu-miR-12194-3p	LNC_005371
mmu-miR-134-3p	LNC_005371
mmu-miR-149-5p	LNC_005371
mmu-miR-210-3p	LNC_005371
mmu-miR-24-3p	LNC_005371
mmu-miR-3074-5p	LNC_005371
mmu-miR-6989-3p	LNC_005371
mmu-miR-211-5p	LNC_005467
mmu-miR-411-3p	LNC_005467
mmu-miR-12194-3p	LNC_005613
mmu-miR-3074-5p	LNC_005613
mmu-miR-3470a	LNC_005613
mmu-miR-467a-5p	LNC_005613
mmu-miR-679-5p	LNC_005613
mmu-miR-149-5p	LNC_005632
mmu-miR-24-3p	LNC_005632
mmu-miR-134-3p	LNC_005746
mmu-miR-3074-5p	LNC_005746
mmu-miR-411-3p	LNC_005746
mmu-miR-211-5p	LNC_005751
mmu-miR-363-3p	LNC_005751
mmu-miR-330-5p	LNC_005772
mmu-miR-12194-3p	LNC_005792
mmu-miR-149-5p	LNC_005792
mmu-miR-211-5p	LNC_005792
mmu-miR-6989-3p	LNC_005792
mmu-miR-149-5p	LNC_005909
mmu-miR-3074-5p	LNC_005909
mmu-miR-3081-3p	LNC_005909
mmu-miR-330-5p	LNC_005909
mmu-miR-6989-3p	LNC_005909
mmu-miR-1198-5p	LNC_006307
mmu-miR-187-3p	LNC_006307
mmu-miR-330-5p	LNC_006307
mmu-miR-467b-5p	LNC_006307
mmu-miR-211-5p	LNC_006772

## Sheet: type
Supplemental Table S10. Nodes types in the 6no9yes group
Drp2	down	gene
Myo18a	down	gene
Myo18a	down	gene
Trmt1	down	gene
Trmt1	down	gene
Ift46	down	gene
Celf2	down	gene
Btbd6	down	gene
Btbd6	down	gene
Cd36	down	gene
Ddr1	down	gene
Ddr1	down	gene
Ddr1	down	gene
Rad23a	down	gene
Pde1c	down	gene
Pde1c	down	gene
Pex5	down	gene
Kctd20	down	gene
Tpr	down	gene
Ggt1	down	gene
Prrg2	down	gene
Arid1a	down	gene
Elavl2	down	gene
Nfib	down	gene
Nfib	down	gene
Rps15a	down	gene
Rps15a	down	gene
Tnpo1	down	gene
Tnpo1	down	gene
Rnmt	down	gene
Rnmt	down	gene
Dhdds	down	gene
Etv5	down	gene
Etv5	down	gene
Bicc1	down	gene
Tbp	down	gene
Unkl	down	gene
Hmgb3	down	gene
Tenm1	down	gene
Kcnq2	down	gene
Kcnq2	down	gene
Slc35c2	down	gene
Afmid	down	gene
Afmid	down	gene
Med1	down	gene
Med1	down	gene
43716	down	gene
43716	down	gene
Ncor1	down	gene
Ncor1	down	gene
Lhx9	down	gene
Lhx9	down	gene
Mgat4c	down	gene
Mgat4c	down	gene
Vps54	down	gene
Cnot2	down	gene
Prmt2	down	gene
Pus10	down	gene
Hnrnpab	down	gene
Hnrnpab	down	gene
Cdkl3	down	gene
Cdkl3	down	gene
Trim11	down	gene
Cacna1g	down	gene
Akap5	down	gene
Akap5	down	gene
Vrk1	down	gene
Vrk1	down	gene
Rgs6	down	gene
Rgs6	down	gene
Dpf3	down	gene
Dpf3	down	gene
Trpc7	down	gene
Ktn1	down	gene
Ktn1	down	gene
Spata13	down	gene
Spata13	down	gene
Clu	down	gene
Bnip3l	down	gene
Trp63	down	gene
Bfar	down	gene
Bfar	down	gene
2610015P09Rik	down	gene
Zfp148	down	gene
Itsn1	down	gene
Donson	down	gene
Donson	down	gene
Pigx	down	gene
Pigx	down	gene
Myom1	down	gene
Ralbp1	down	gene
Ralbp1	down	gene
Nrxn1	down	gene
St6gal2	down	gene
St6gal2	down	gene
Sox8	down	gene
Sox8	down	gene
Zfp523	down	gene
Mapre2	down	gene
Mapre2	down	gene
Sncaip	down	gene
Sncaip	down	gene
Megf10	down	gene
Ehbp1l1	down	gene
Ehbp1l1	down	gene
Mark2	down	gene
Col7a1	down	gene
Arhgef9	down	gene
Plk4	down	gene
Unc5a	down	gene
Unc5a	down	gene
Slco5a1	down	gene
Slco5a1	down	gene
Mob4	down	gene
Mob4	down	gene
Rhbdd1	down	gene
Steap3	down	gene
Steap3	down	gene
Rassf5	down	gene
Rassf5	down	gene
Slc45a3	down	gene
Slc45a3	down	gene
Chit1	down	gene
Cyb5r1	down	gene
Cyb5r1	down	gene
Lamc2	down	gene
Adcy10	down	gene
Adcy10	down	gene
Sele	down	gene
Astn1	down	gene
Astn1	down	gene
Suv39h2	down	gene
Suv39h2	down	gene
Fcgr2b	down	gene
Fcgr2b	down	gene
Pter	down	gene
Pter	down	gene
Fam188a	down	gene
Fam188a	down	gene
Psd4	down	gene
B230118H07Rik	down	gene
B230118H07Rik	down	gene
Slx4ip	down	gene
Mtch2	down	gene
Atp9a	down	gene
Zgpat	down	gene
Zgpat	down	gene
Skil	down	gene
Ints3	down	gene
Tpm3	down	gene
Gstcd	down	gene
Gstcd	down	gene
Dclk2	down	gene
Dclk2	down	gene
Tars2	down	gene
Tars2	down	gene
Tspan5	down	gene
Ccne2	down	gene
Ccne2	down	gene
Rnf11	down	gene
Rnf11	down	gene
Nfia	down	gene
Espn	down	gene
Add1	down	gene
Spata18	down	gene
Mtf2	down	gene
Mtf2	down	gene
Ddx55	down	gene
Brap	down	gene
Sirt4	down	gene
Sirt4	down	gene
Foxp2	down	gene
Fscn1	down	gene
Ahcyl2	down	gene
Lrig1	down	gene
Lrig1	down	gene
Atf7ip	down	gene
Apba2	down	gene
Blm	down	gene
Cib1	down	gene
Ttc23	down	gene
Sipa1l3	down	gene
Sipa1l3	down	gene
Stard10	down	gene
Stard10	down	gene
Itgam	down	gene
Rnf141	down	gene
Porcn	down	gene
Ikbkb	down	gene
Sorbs2	down	gene
Sorbs2	down	gene
Tecr	down	gene
Tfdp2	down	gene
Tfdp2	down	gene
Kif9	down	gene
Ephb1	down	gene
Ephb1	down	gene
Dnajc13	down	gene
Prkar2a	down	gene
Flcn	down	gene
Arap1	down	gene
Foxj3	down	gene
C330027C09Rik	down	gene
Lmo7	down	gene
Lmo7	down	gene
Triobp	down	gene
Trappc8	down	gene
Cacul1	down	gene
Apol6	down	gene
Apol6	down	gene
St18	down	gene
Ephx4	down	gene
Ccnd3	down	gene
Celf5	down	gene
Celf5	down	gene
G2e3	down	gene
G2e3	down	gene
Lzts2	down	gene
Lzts2	down	gene
Tsen34	down	gene
Tsen34	down	gene
Hmha1	down	gene
Cd99l2	down	gene
Cd99l2	down	gene
Fmnl2	down	gene
Igsf10	down	gene
Igsf10	down	gene
C530008M17Rik	down	gene
Ehmt1	down	gene
Zfp280c	down	gene
Zfp280c	down	gene
Zdhhc9	down	gene
Zdhhc9	down	gene
Cfap61	down	gene
Cfap61	down	gene
Fam193a	down	gene
4932438A13Rik	down	gene
4932438A13Rik	down	gene
Fbxo27	down	gene
Rapgef6	down	gene
Mynn	down	gene
Mynn	down	gene
Limch1	down	gene
Limch1	down	gene
Parp11	down	gene
Parp11	down	gene
Lace1	down	gene
Tbkbp1	down	gene
Rtel1	down	gene
Josd2	down	gene
Rbms3	down	gene
Endov	down	gene
Endov	down	gene
Timeless	down	gene
Negr1	down	gene
Eml2	down	gene
Wdr25	down	gene
Hectd2	down	gene
Rap1gap	down	gene
Rap1gap	down	gene
Tardbp	down	gene
Ccdc64	down	gene
Atxn2	down	gene
Dpy19l1	down	gene
Dpy19l1	down	gene
Synpo	down	gene
Zfp536	down	gene
A830080D01Rik	down	gene
A830080D01Rik	down	gene
Grsf1	down	gene
Grsf1	down	gene
Grsf1	down	gene
Slc38a6	down	gene
Napepld	down	gene
Napepld	down	gene
Golph3l	down	gene
Mapk10	down	gene
Mapk10	down	gene
Atxn1	down	gene
Atxn1	down	gene
Trim16	down	gene
Trim16	down	gene
Ldlrad3	down	gene
Ldlrad3	down	gene
Pou4f1	down	gene
Pou4f1	down	gene
Nrsn1	down	gene
Nrsn1	down	gene
Aftph	down	gene
Aftph	down	gene
Lgr4	down	gene
Lgr4	down	gene
Lgr4	down	gene
Fbxo46	down	gene
Lypd6	down	gene
Fam118b	down	gene
Fam118b	down	gene
Tmem125	down	gene
Zbtb22	down	gene
Crebzf	down	gene
Kcnj16	down	gene
Kcnj16	down	gene
Magi3	down	gene
Pcdh15	down	gene
Traf7	down	gene
Traf7	down	gene
Daw1	down	gene
Fgfr3	down	gene
Fgfr3	down	gene
A630033H20Rik	down	gene
A630033H20Rik	down	gene
Zscan22	down	gene
Zscan22	down	gene
4933427D06Rik	down	gene
4933427D06Rik	down	gene
Inca1	down	gene
Homez	down	gene
Sema3b	down	gene
Phtf1	down	gene
Anks1b	down	gene
Ntrk3	down	gene
Bcas3	down	gene
Mbtd1	down	gene
Mbtd1	down	gene
Mbtd1	down	gene
Ccdc28a	down	gene
Ntng1	down	gene
Ntng1	down	gene
Caln1	down	gene
Tmem219	down	gene
Agbl4	down	gene
Dlgap4	down	gene
Kalrn	down	gene
Ttr	down	gene
Lmtk3	down	gene
Kcnma1	down	gene
Zfp467	down	gene
Dazap1	down	gene
Rgma	down	gene
B230216G23Rik	down	gene
B230216G23Rik	down	gene
Zfp777	down	gene
Zfp777	down	gene
Foxr2	down	gene
Foxr2	down	gene
Eif2s2	down	gene
Eif2s2	down	gene
Wipf1	down	gene
Gm4724	down	gene
Gm4723	down	gene
Cers1	down	gene
Palm2Akap2	down	gene
Palm2Akap2	down	gene
Tex9	down	gene
Tex9	down	gene
Apol11b	down	gene
Apol11b	down	gene
Gm28049	down	gene
Gm28048	down	gene
Gm28048	down	gene
ENSMUST00000131345.7	down	lnc
ENSMUST00000131345.7	down	lnc
ENSMUST00000131345.7	down	lnc
ENSMUST00000131345.7	down	lnc
ENSMUST00000131345.7	down	lnc
ENSMUST00000131345.7	down	lnc
ENSMUST00000182656.7	down	lnc
ENSMUST00000182656.7	down	lnc
ENSMUST00000182656.7	down	lnc
ENSMUST00000199309.4	down	lnc
ENSMUST00000199309.4	down	lnc
LNC_000109	down	lnc
LNC_000109	down	lnc
LNC_000217	down	lnc
LNC_000217	down	lnc
LNC_000217	down	lnc
LNC_000217	down	lnc
LNC_000217	down	lnc
LNC_000217	down	lnc
LNC_000217	down	lnc
LNC_000217	down	lnc
LNC_000217	down	lnc
LNC_000217	down	lnc
LNC_000217	down	lnc
LNC_000233	down	lnc
LNC_000233	down	lnc
LNC_000288	down	lnc
LNC_000288	down	lnc
LNC_000288	down	lnc
LNC_000288	down	lnc
LNC_000288	down	lnc
LNC_000288	down	lnc
LNC_000288	down	lnc
LNC_000622	down	lnc
LNC_000622	down	lnc
LNC_000745	down	lnc
LNC_001116	down	lnc
LNC_001116	down	lnc
LNC_001213	down	lnc
LNC_001213	down	lnc
LNC_001213	down	lnc
LNC_001213	down	lnc
LNC_001213	down	lnc
LNC_001213	down	lnc
LNC_001229	down	lnc
LNC_001277	down	lnc
LNC_001428	down	lnc
LNC_001428	down	lnc
LNC_001498	down	lnc
LNC_001498	down	lnc
LNC_001498	down	lnc
LNC_001498	down	lnc
LNC_001498	down	lnc
LNC_001498	down	lnc
LNC_001498	down	lnc
LNC_001502	down	lnc
LNC_001502	down	lnc
LNC_001502	down	lnc
LNC_001502	down	lnc
LNC_001502	down	lnc
LNC_001661	down	lnc
LNC_001661	down	lnc
LNC_001661	down	lnc
LNC_001818	down	lnc
LNC_001818	down	lnc
LNC_001818	down	lnc
LNC_001818	down	lnc
LNC_001818	down	lnc
LNC_001818	down	lnc
LNC_001818	down	lnc
LNC_001946	down	lnc
LNC_002144	down	lnc
LNC_002373	down	lnc
LNC_002373	down	lnc
LNC_002373	down	lnc
LNC_002373	down	lnc
LNC_002373	down	lnc
LNC_002387	down	lnc
LNC_002387	down	lnc
LNC_002387	down	lnc
LNC_002387	down	lnc
LNC_002387	down	lnc
LNC_002387	down	lnc
LNC_002387	down	lnc
LNC_002387	down	lnc
LNC_002387	down	lnc
LNC_002387	down	lnc
LNC_002387	down	lnc
LNC_002400	down	lnc
LNC_002400	down	lnc
LNC_002400	down	lnc
LNC_002400	down	lnc
LNC_002400	down	lnc
LNC_002400	down	lnc
LNC_002451	down	lnc
LNC_002451	down	lnc
LNC_002451	down	lnc
LNC_002451	down	lnc
LNC_002451	down	lnc
LNC_002451	down	lnc
LNC_002555	down	lnc
LNC_002620	down	lnc
LNC_002620	down	lnc
LNC_002620	down	lnc
LNC_003096	down	lnc
LNC_003096	down	lnc
LNC_003118	down	lnc
LNC_003118	down	lnc
LNC_003118	down	lnc
LNC_003118	down	lnc
LNC_003118	down	lnc
LNC_003118	down	lnc
LNC_003119	down	lnc
LNC_003119	down	lnc
LNC_003119	down	lnc
LNC_003369	down	lnc
LNC_003369	down	lnc
LNC_003369	down	lnc
LNC_003541	down	lnc
LNC_003541	down	lnc
LNC_003659	down	lnc
LNC_003659	down	lnc
LNC_003731	down	lnc
LNC_003801	down	lnc
LNC_003801	down	lnc
LNC_003852	down	lnc
LNC_003852	down	lnc
LNC_003852	down	lnc
LNC_003852	down	lnc
LNC_003852	down	lnc
LNC_003852	down	lnc
LNC_003852	down	lnc
LNC_004298	down	lnc
LNC_004298	down	lnc
LNC_004317	down	lnc
LNC_004317	down	lnc
LNC_004317	down	lnc
LNC_004317	down	lnc
LNC_004317	down	lnc
LNC_004317	down	lnc
LNC_004456	down	lnc
LNC_004471	down	lnc
LNC_004474	down	lnc
LNC_004474	down	lnc
LNC_004718	down	lnc
LNC_004718	down	lnc
LNC_005067	down	lnc
LNC_005067	down	lnc
LNC_005067	down	lnc
LNC_005067	down	lnc
LNC_005067	down	lnc
LNC_005067	down	lnc
LNC_005067	down	lnc
LNC_005067	down	lnc
LNC_005072	down	lnc
LNC_005072	down	lnc
LNC_005072	down	lnc
LNC_005072	down	lnc
LNC_005072	down	lnc
LNC_005072	down	lnc
LNC_005072	down	lnc
LNC_005072	down	lnc
LNC_005072	down	lnc
LNC_005327	down	lnc
LNC_005327	down	lnc
LNC_005327	down	lnc
LNC_005371	down	lnc
LNC_005371	down	lnc
LNC_005371	down	lnc
LNC_005371	down	lnc
LNC_005371	down	lnc
LNC_005371	down	lnc
LNC_005371	down	lnc
LNC_005371	down	lnc
LNC_005467	down	lnc
LNC_005467	down	lnc
LNC_005613	down	lnc
LNC_005613	down	lnc
LNC_005613	down	lnc
LNC_005613	down	lnc
LNC_005613	down	lnc
LNC_005632	down	lnc
LNC_005632	down	lnc
LNC_005746	down	lnc
LNC_005746	down	lnc
LNC_005746	down	lnc
LNC_005751	down	lnc
LNC_005751	down	lnc
LNC_005772	down	lnc
LNC_005792	down	lnc
LNC_005792	down	lnc
LNC_005792	down	lnc
LNC_005792	down	lnc
LNC_005909	down	lnc
LNC_005909	down	lnc
LNC_005909	down	lnc
LNC_005909	down	lnc
LNC_005909	down	lnc
LNC_006307	down	lnc
LNC_006307	down	lnc
LNC_006307	down	lnc
LNC_006307	down	lnc
LNC_006772	down	lnc
mmu-miR-1198-5p	up	miR
mmu-miR-1198-5p	up	miR
mmu-miR-1198-5p	up	miR
mmu-miR-1198-5p	up	miR
mmu-miR-1198-5p	up	miR
mmu-miR-1198-5p	up	miR
mmu-miR-1198-5p	up	miR
mmu-miR-1198-5p	up	miR
mmu-miR-1198-5p	up	miR
mmu-miR-1198-5p	up	miR
mmu-miR-1198-5p	up	miR
mmu-miR-1198-5p	up	miR
mmu-miR-1198-5p	up	miR
mmu-miR-1198-5p	up	miR
mmu-miR-1198-5p	up	miR
mmu-miR-1198-5p	up	miR
mmu-miR-1198-5p	up	miR
mmu-miR-1198-5p	up	miR
mmu-miR-1198-5p	up	miR
mmu-miR-1198-5p	up	miR
mmu-miR-1198-5p	up	miR
mmu-miR-1198-5p	up	miR
mmu-miR-1198-5p	up	miR
mmu-miR-1198-5p	up	miR
mmu-miR-1198-5p	up	miR
mmu-miR-1198-5p	up	miR
mmu-miR-12194-3p	up	miR
mmu-miR-12194-3p	up	miR
mmu-miR-12194-3p	up	miR
mmu-miR-12194-3p	up	miR
mmu-miR-12194-3p	up	miR
mmu-miR-12194-3p	up	miR
mmu-miR-12194-3p	up	miR
mmu-miR-12194-3p	up	miR
mmu-miR-12194-3p	up	miR
mmu-miR-12194-3p	up	miR
mmu-miR-12194-3p	up	miR
mmu-miR-12194-3p	up	miR
mmu-miR-12194-3p	up	miR
mmu-miR-12194-3p	up	miR
mmu-miR-12194-3p	up	miR
mmu-miR-12194-3p	up	miR
mmu-miR-12194-3p	up	miR
mmu-miR-12194-3p	up	miR
mmu-miR-12194-3p	up	miR
mmu-miR-12194-3p	up	miR
mmu-miR-12194-3p	up	miR
mmu-miR-12194-3p	up	miR
mmu-miR-12194-3p	up	miR
mmu-miR-12194-3p	up	miR
mmu-miR-12194-3p	up	miR
mmu-miR-12194-3p	up	miR
mmu-miR-12194-3p	up	miR
mmu-miR-12194-3p	up	miR
mmu-miR-12194-3p	up	miR
mmu-miR-12194-3p	up	miR
mmu-miR-126a-3p	up	miR
mmu-miR-126a-3p	up	miR
mmu-miR-126a-3p	up	miR
mmu-miR-126a-3p	up	miR
mmu-miR-126a-3p	up	miR
mmu-miR-126a-3p	up	miR
mmu-miR-126a-3p	up	miR
mmu-miR-126a-3p	up	miR
mmu-miR-126a-3p	up	miR
mmu-miR-126a-3p	up	miR
mmu-miR-126a-3p	up	miR
mmu-miR-126a-3p	up	miR
mmu-miR-126a-3p	up	miR
mmu-miR-126a-3p	up	miR
mmu-miR-126a-3p	up	miR
mmu-miR-126a-3p	up	miR
mmu-miR-134-3p	up	miR
mmu-miR-134-3p	up	miR
mmu-miR-134-3p	up	miR
mmu-miR-134-3p	up	miR
mmu-miR-134-3p	up	miR
mmu-miR-134-3p	up	miR
mmu-miR-134-3p	up	miR
mmu-miR-134-3p	up	miR
mmu-miR-134-3p	up	miR
mmu-miR-134-3p	up	miR
mmu-miR-134-3p	up	miR
mmu-miR-134-3p	up	miR
mmu-miR-134-3p	up	miR
mmu-miR-134-3p	up	miR
mmu-miR-134-3p	up	miR
mmu-miR-134-3p	up	miR
mmu-miR-134-3p	up	miR
mmu-miR-134-3p	up	miR
mmu-miR-134-3p	up	miR
mmu-miR-134-3p	up	miR
mmu-miR-134-3p	up	miR
mmu-miR-134-3p	up	miR
mmu-miR-134-3p	up	miR
mmu-miR-134-3p	up	miR
mmu-miR-134-3p	up	miR
mmu-miR-134-3p	up	miR
mmu-miR-134-3p	up	miR
mmu-miR-134-3p	up	miR
mmu-miR-134-3p	up	miR
mmu-miR-134-3p	up	miR
mmu-miR-149-5p	up	miR
mmu-miR-149-5p	up	miR
mmu-miR-149-5p	up	miR
mmu-miR-149-5p	up	miR
mmu-miR-149-5p	up	miR
mmu-miR-149-5p	up	miR
mmu-miR-149-5p	up	miR
mmu-miR-149-5p	up	miR
mmu-miR-149-5p	up	miR
mmu-miR-149-5p	up	miR
mmu-miR-149-5p	up	miR
mmu-miR-149-5p	up	miR
mmu-miR-149-5p	up	miR
mmu-miR-149-5p	up	miR
mmu-miR-149-5p	up	miR
mmu-miR-149-5p	up	miR
mmu-miR-149-5p	up	miR
mmu-miR-149-5p	up	miR
mmu-miR-149-5p	up	miR
mmu-miR-149-5p	up	miR
mmu-miR-149-5p	up	miR
mmu-miR-149-5p	up	miR
mmu-miR-149-5p	up	miR
mmu-miR-149-5p	up	miR
mmu-miR-149-5p	up	miR
mmu-miR-149-5p	up	miR
mmu-miR-149-5p	up	miR
mmu-miR-149-5p	up	miR
mmu-miR-149-5p	up	miR
mmu-miR-149-5p	up	miR
mmu-miR-187-3p	up	miR
mmu-miR-187-3p	up	miR
mmu-miR-187-3p	up	miR
mmu-miR-187-3p	up	miR
mmu-miR-187-3p	up	miR
mmu-miR-187-3p	up	miR
mmu-miR-187-3p	up	miR
mmu-miR-187-3p	up	miR
mmu-miR-187-3p	up	miR
mmu-miR-187-3p	up	miR
mmu-miR-187-3p	up	miR
mmu-miR-187-3p	up	miR
mmu-miR-187-3p	up	miR
mmu-miR-187-3p	up	miR
mmu-miR-187-3p	up	miR
mmu-miR-187-3p	up	miR
mmu-miR-187-3p	up	miR
mmu-miR-187-3p	up	miR
mmu-miR-187-3p	up	miR
mmu-miR-187-3p	up	miR
mmu-miR-210-3p	up	miR
mmu-miR-210-3p	up	miR
mmu-miR-210-3p	up	miR
mmu-miR-210-3p	up	miR
mmu-miR-210-3p	up	miR
mmu-miR-210-3p	up	miR
mmu-miR-210-3p	up	miR
mmu-miR-210-3p	up	miR
mmu-miR-210-3p	up	miR
mmu-miR-210-3p	up	miR
mmu-miR-210-3p	up	miR
mmu-miR-210-3p	up	miR
mmu-miR-210-3p	up	miR
mmu-miR-210-3p	up	miR
mmu-miR-210-3p	up	miR
mmu-miR-210-3p	up	miR
mmu-miR-210-3p	up	miR
mmu-miR-210-3p	up	miR
mmu-miR-210-3p	up	miR
mmu-miR-210-3p	up	miR
mmu-miR-211-5p	up	miR
mmu-miR-211-5p	up	miR
mmu-miR-211-5p	up	miR
mmu-miR-211-5p	up	miR
mmu-miR-211-5p	up	miR
mmu-miR-211-5p	up	miR
mmu-miR-211-5p	up	miR
mmu-miR-211-5p	up	miR
mmu-miR-211-5p	up	miR
mmu-miR-211-5p	up	miR
mmu-miR-211-5p	up	miR
mmu-miR-211-5p	up	miR
mmu-miR-211-5p	up	miR
mmu-miR-211-5p	up	miR
mmu-miR-211-5p	up	miR
mmu-miR-211-5p	up	miR
mmu-miR-211-5p	up	miR
mmu-miR-211-5p	up	miR
mmu-miR-211-5p	up	miR
mmu-miR-211-5p	up	miR
mmu-miR-211-5p	up	miR
mmu-miR-211-5p	up	miR
mmu-miR-211-5p	up	miR
mmu-miR-211-5p	up	miR
mmu-miR-211-5p	up	miR
mmu-miR-211-5p	up	miR
mmu-miR-211-5p	up	miR
mmu-miR-211-5p	up	miR
mmu-miR-211-5p	up	miR
mmu-miR-211-5p	up	miR
mmu-miR-24-3p	up	miR
mmu-miR-24-3p	up	miR
mmu-miR-24-3p	up	miR
mmu-miR-24-3p	up	miR
mmu-miR-24-3p	up	miR
mmu-miR-24-3p	up	miR
mmu-miR-24-3p	up	miR
mmu-miR-24-3p	up	miR
mmu-miR-24-3p	up	miR
mmu-miR-24-3p	up	miR
mmu-miR-24-3p	up	miR
mmu-miR-24-3p	up	miR
mmu-miR-24-3p	up	miR
mmu-miR-24-3p	up	miR
mmu-miR-24-3p	up	miR
mmu-miR-24-3p	up	miR
mmu-miR-24-3p	up	miR
mmu-miR-24-3p	up	miR
mmu-miR-24-3p	up	miR
mmu-miR-24-3p	up	miR
mmu-miR-24-3p	up	miR
mmu-miR-24-3p	up	miR
mmu-miR-24-3p	up	miR
mmu-miR-24-3p	up	miR
mmu-miR-24-3p	up	miR
mmu-miR-24-3p	up	miR
mmu-miR-24-3p	up	miR
mmu-miR-24-3p	up	miR
mmu-miR-24-3p	up	miR
mmu-miR-24-3p	up	miR
mmu-miR-3074-5p	up	miR
mmu-miR-3074-5p	up	miR
mmu-miR-3074-5p	up	miR
mmu-miR-3074-5p	up	miR
mmu-miR-3074-5p	up	miR
mmu-miR-3074-5p	up	miR
mmu-miR-3074-5p	up	miR
mmu-miR-3074-5p	up	miR
mmu-miR-3074-5p	up	miR
mmu-miR-3074-5p	up	miR
mmu-miR-3074-5p	up	miR
mmu-miR-3074-5p	up	miR
mmu-miR-3074-5p	up	miR
mmu-miR-3074-5p	up	miR
mmu-miR-3074-5p	up	miR
mmu-miR-3074-5p	up	miR
mmu-miR-3074-5p	up	miR
mmu-miR-3074-5p	up	miR
mmu-miR-3074-5p	up	miR
mmu-miR-3074-5p	up	miR
mmu-miR-3074-5p	up	miR
mmu-miR-3074-5p	up	miR
mmu-miR-3074-5p	up	miR
mmu-miR-3074-5p	up	miR
mmu-miR-3074-5p	up	miR
mmu-miR-3074-5p	up	miR
mmu-miR-3074-5p	up	miR
mmu-miR-3074-5p	up	miR
mmu-miR-3074-5p	up	miR
mmu-miR-3074-5p	up	miR
mmu-miR-3081-3p	up	miR
mmu-miR-3081-3p	up	miR
mmu-miR-3081-3p	up	miR
mmu-miR-3081-3p	up	miR
mmu-miR-3081-3p	up	miR
mmu-miR-3081-3p	up	miR
mmu-miR-3081-3p	up	miR
mmu-miR-3081-3p	up	miR
mmu-miR-3081-3p	up	miR
mmu-miR-3081-3p	up	miR
mmu-miR-3081-3p	up	miR
mmu-miR-3081-3p	up	miR
mmu-miR-3081-3p	up	miR
mmu-miR-3081-3p	up	miR
mmu-miR-3081-3p	up	miR
mmu-miR-3081-3p	up	miR
mmu-miR-3081-3p	up	miR
mmu-miR-30f	up	miR
mmu-miR-30f	up	miR
mmu-miR-30f	up	miR
mmu-miR-30f	up	miR
mmu-miR-30f	up	miR
mmu-miR-30f	up	miR
mmu-miR-30f	up	miR
mmu-miR-30f	up	miR
mmu-miR-30f	up	miR
mmu-miR-30f	up	miR
mmu-miR-30f	up	miR
mmu-miR-30f	up	miR
mmu-miR-30f	up	miR
mmu-miR-30f	up	miR
mmu-miR-30f	up	miR
mmu-miR-30f	up	miR
mmu-miR-30f	up	miR
mmu-miR-30f	up	miR
mmu-miR-30f	up	miR
mmu-miR-30f	up	miR
mmu-miR-30f	up	miR
mmu-miR-330-5p	up	miR
mmu-miR-330-5p	up	miR
mmu-miR-330-5p	up	miR
mmu-miR-330-5p	up	miR
mmu-miR-330-5p	up	miR
mmu-miR-330-5p	up	miR
mmu-miR-330-5p	up	miR
mmu-miR-330-5p	up	miR
mmu-miR-330-5p	up	miR
mmu-miR-330-5p	up	miR
mmu-miR-330-5p	up	miR
mmu-miR-330-5p	up	miR
mmu-miR-330-5p	up	miR
mmu-miR-330-5p	up	miR
mmu-miR-330-5p	up	miR
mmu-miR-330-5p	up	miR
mmu-miR-330-5p	up	miR
mmu-miR-330-5p	up	miR
mmu-miR-330-5p	up	miR
mmu-miR-330-5p	up	miR
mmu-miR-330-5p	up	miR
mmu-miR-330-5p	up	miR
mmu-miR-330-5p	up	miR
mmu-miR-330-5p	up	miR
mmu-miR-330-5p	up	miR
mmu-miR-330-5p	up	miR
mmu-miR-330-5p	up	miR
mmu-miR-330-5p	up	miR
mmu-miR-330-5p	up	miR
mmu-miR-3470a	up	miR
mmu-miR-3470a	up	miR
mmu-miR-3470a	up	miR
mmu-miR-3470a	up	miR
mmu-miR-3470a	up	miR
mmu-miR-3470a	up	miR
mmu-miR-3470a	up	miR
mmu-miR-3470a	up	miR
mmu-miR-3470a	up	miR
mmu-miR-3470a	up	miR
mmu-miR-3470a	up	miR
mmu-miR-3470a	up	miR
mmu-miR-3470a	up	miR
mmu-miR-3470a	up	miR
mmu-miR-3470a	up	miR
mmu-miR-3470a	up	miR
mmu-miR-3470a	up	miR
mmu-miR-3470a	up	miR
mmu-miR-3470a	up	miR
mmu-miR-3470a	up	miR
mmu-miR-3470a	up	miR
mmu-miR-3470a	up	miR
mmu-miR-3470a	up	miR
mmu-miR-3470a	up	miR
mmu-miR-3470a	up	miR
mmu-miR-3470a	up	miR
mmu-miR-363-3p	up	miR
mmu-miR-363-3p	up	miR
mmu-miR-363-3p	up	miR
mmu-miR-363-3p	up	miR
mmu-miR-363-3p	up	miR
mmu-miR-363-3p	up	miR
mmu-miR-363-3p	up	miR
mmu-miR-363-3p	up	miR
mmu-miR-363-3p	up	miR
mmu-miR-363-3p	up	miR
mmu-miR-363-3p	up	miR
mmu-miR-363-3p	up	miR
mmu-miR-363-3p	up	miR
mmu-miR-363-3p	up	miR
mmu-miR-363-3p	up	miR
mmu-miR-363-3p	up	miR
mmu-miR-363-3p	up	miR
mmu-miR-363-3p	up	miR
mmu-miR-363-3p	up	miR
mmu-miR-363-3p	up	miR
mmu-miR-363-3p	up	miR
mmu-miR-379-5p	up	miR
mmu-miR-379-5p	up	miR
mmu-miR-379-5p	up	miR
mmu-miR-379-5p	up	miR
mmu-miR-379-5p	up	miR
mmu-miR-379-5p	up	miR
mmu-miR-379-5p	up	miR
mmu-miR-379-5p	up	miR
mmu-miR-379-5p	up	miR
mmu-miR-379-5p	up	miR
mmu-miR-379-5p	up	miR
mmu-miR-379-5p	up	miR
mmu-miR-379-5p	up	miR
mmu-miR-379-5p	up	miR
mmu-miR-379-5p	up	miR
mmu-miR-379-5p	up	miR
mmu-miR-379-5p	up	miR
mmu-miR-411-3p	up	miR
mmu-miR-411-3p	up	miR
mmu-miR-411-3p	up	miR
mmu-miR-411-3p	up	miR
mmu-miR-411-3p	up	miR
mmu-miR-411-3p	up	miR
mmu-miR-411-3p	up	miR
mmu-miR-411-3p	up	miR
mmu-miR-411-3p	up	miR
mmu-miR-411-3p	up	miR
mmu-miR-411-3p	up	miR
mmu-miR-411-3p	up	miR
mmu-miR-411-3p	up	miR
mmu-miR-411-3p	up	miR
mmu-miR-411-3p	up	miR
mmu-miR-411-3p	up	miR
mmu-miR-411-3p	up	miR
mmu-miR-411-3p	up	miR
mmu-miR-411-3p	up	miR
mmu-miR-411-3p	up	miR
mmu-miR-411-3p	up	miR
mmu-miR-411-3p	up	miR
mmu-miR-467a-5p	up	miR
mmu-miR-467a-5p	up	miR
mmu-miR-467a-5p	up	miR
mmu-miR-467a-5p	up	miR
mmu-miR-467a-5p	up	miR
mmu-miR-467a-5p	up	miR
mmu-miR-467a-5p	up	miR
mmu-miR-467a-5p	up	miR
mmu-miR-467a-5p	up	miR
mmu-miR-467a-5p	up	miR
mmu-miR-467a-5p	up	miR
mmu-miR-467a-5p	up	miR
mmu-miR-467a-5p	up	miR
mmu-miR-467a-5p	up	miR
mmu-miR-467a-5p	up	miR
mmu-miR-467a-5p	up	miR
mmu-miR-467a-5p	up	miR
mmu-miR-467a-5p	up	miR
mmu-miR-467a-5p	up	miR
mmu-miR-467a-5p	up	miR
mmu-miR-467a-5p	up	miR
mmu-miR-467a-5p	up	miR
mmu-miR-467b-5p	up	miR
mmu-miR-467b-5p	up	miR
mmu-miR-467b-5p	up	miR
mmu-miR-467b-5p	up	miR
mmu-miR-467b-5p	up	miR
mmu-miR-467b-5p	up	miR
mmu-miR-467b-5p	up	miR
mmu-miR-467b-5p	up	miR
mmu-miR-467b-5p	up	miR
mmu-miR-467b-5p	up	miR
mmu-miR-467b-5p	up	miR
mmu-miR-467b-5p	up	miR
mmu-miR-467b-5p	up	miR
mmu-miR-467b-5p	up	miR
mmu-miR-467b-5p	up	miR
mmu-miR-467b-5p	up	miR
mmu-miR-467b-5p	up	miR
mmu-miR-467b-5p	up	miR
mmu-miR-666-5p	up	miR
mmu-miR-666-5p	up	miR
mmu-miR-666-5p	up	miR
mmu-miR-666-5p	up	miR
mmu-miR-666-5p	up	miR
mmu-miR-666-5p	up	miR
mmu-miR-666-5p	up	miR
mmu-miR-666-5p	up	miR
mmu-miR-666-5p	up	miR
mmu-miR-666-5p	up	miR
mmu-miR-666-5p	up	miR
mmu-miR-666-5p	up	miR
mmu-miR-666-5p	up	miR
mmu-miR-666-5p	up	miR
mmu-miR-666-5p	up	miR
mmu-miR-666-5p	up	miR
mmu-miR-666-5p	up	miR
mmu-miR-666-5p	up	miR
mmu-miR-679-5p	up	miR
mmu-miR-679-5p	up	miR
mmu-miR-679-5p	up	miR
mmu-miR-679-5p	up	miR
mmu-miR-679-5p	up	miR
mmu-miR-679-5p	up	miR
mmu-miR-679-5p	up	miR
mmu-miR-679-5p	up	miR
mmu-miR-679-5p	up	miR
mmu-miR-679-5p	up	miR
mmu-miR-679-5p	up	miR
mmu-miR-679-5p	up	miR
mmu-miR-679-5p	up	miR
mmu-miR-679-5p	up	miR
mmu-miR-679-5p	up	miR
mmu-miR-679-5p	up	miR
mmu-miR-679-5p	up	miR
mmu-miR-679-5p	up	miR
mmu-miR-679-5p	up	miR
mmu-miR-679-5p	up	miR
mmu-miR-679-5p	up	miR
mmu-miR-679-5p	up	miR
mmu-miR-679-5p	up	miR
mmu-miR-679-5p	up	miR
mmu-miR-679-5p	up	miR
mmu-miR-679-5p	up	miR
mmu-miR-679-5p	up	miR
mmu-miR-679-5p	up	miR
mmu-miR-679-5p	up	miR
mmu-miR-679-5p	up	miR
mmu-miR-6989-3p	up	miR
mmu-miR-6989-3p	up	miR
mmu-miR-6989-3p	up	miR
mmu-miR-6989-3p	up	miR
mmu-miR-6989-3p	up	miR
mmu-miR-6989-3p	up	miR
mmu-miR-6989-3p	up	miR
mmu-miR-6989-3p	up	miR
mmu-miR-6989-3p	up	miR
mmu-miR-6989-3p	up	miR
mmu-miR-6989-3p	up	miR
mmu-miR-6989-3p	up	miR
mmu-miR-6989-3p	up	miR
mmu-miR-6989-3p	up	miR
mmu-miR-6989-3p	up	miR
mmu-miR-6989-3p	up	miR
mmu-miR-6989-3p	up	miR
mmu-miR-6989-3p	up	miR
mmu-miR-6989-3p	up	miR
mmu-miR-6989-3p	up	miR
mmu-miR-6989-3p	up	miR
mmu-miR-6989-3p	up	miR
mmu-miR-6989-3p	up	miR
mmu-miR-6989-3p	up	miR
mmu-miR-7004-5p	up	miR
mmu-miR-7004-5p	up	miR
mmu-miR-7004-5p	up	miR
mmu-miR-7004-5p	up	miR
mmu-miR-7004-5p	up	miR
mmu-miR-7004-5p	up	miR
mmu-miR-7004-5p	up	miR
mmu-miR-7004-5p	up	miR
mmu-miR-7004-5p	up	miR
mmu-miR-7004-5p	up	miR
mmu-miR-7004-5p	up	miR
mmu-miR-7004-5p	up	miR
mmu-miR-7004-5p	up	miR
mmu-miR-7004-5p	up	miR
mmu-miR-7004-5p	up	miR
mmu-miR-7004-5p	up	miR
mmu-miR-7004-5p	up	miR
mmu-miR-7004-5p	up	miR
mmu-miR-7004-5p	up	miR
mmu-miR-99b-3p	up	miR
mmu-miR-99b-3p	up	miR
mmu-miR-99b-3p	up	miR
mmu-miR-99b-3p	up	miR
mmu-miR-99b-3p	up	miR
mmu-miR-99b-3p	up	miR
mmu-miR-99b-3p	up	miR
mmu-miR-99b-3p	up	miR
mmu-miR-99b-3p	up	miR
mmu-miR-99b-3p	up	miR
mmu-miR-99b-3p	up	miR
mmu-miR-99b-3p	up	miR
mmu-miR-99b-3p	up	miR
mmu-miR-99b-3p	up	miR
mmu-miR-99b-3p	up	miR
mmu-miR-99b-3p	up	miR
mmu-miR-99b-3p	up	miR
