# Supplementary material for: Identifying lncRNA–miRNA–mRNA networks to investigate Alzheimer’s disease pathogenesis and therapy strategy
Source: Aging (Albany NY). 2020 Feb 7;12(3):2897–920. doi: 10.18632/aging.102785 (PMC7041741; doi:10.18632/aging.102785)
Supplement: Supplementary Table 11 [file aging-12-102785-s002..xlsx]

## Sheet: node
Supplemental Table S11. Nodes interactions in the 6yes9yes group.
mmu-miR-30b-5p	Elovl1
mmu-miR-30b-5p	Fyn
mmu-miR-30b-5p	Cnot8
mmu-miR-30b-5p	Cacna1g
mmu-miR-30b-5p	Pde4d
mmu-miR-128-3p	Il6st
mmu-miR-128-3p	Ccl25
mmu-miR-30b-5p	Pnpla2
mmu-miR-128-3p	Chm
mmu-miR-30b-5p	Arhgef9
mmu-miR-128-3p	Chst10
mmu-miR-30b-5p	Tnni1
mmu-miR-128-3p	Astn1
mmu-miR-128-3p	Cd82
mmu-miR-30b-5p	Ndst3
mmu-miR-128-3p	Cryz
mmu-miR-30b-5p	Itgam
mmu-miR-128-3p	Smarca1
mmu-miR-128-3p	Morc4
mmu-miR-30b-5p	Arpp21
mmu-miR-128-3p	Rbfox2
mmu-miR-30b-5p	Pik3c3
mmu-miR-30b-5p	Emid1
mmu-miR-128-3p	Zscan21
mmu-miR-128-3p	Atp13a4
mmu-miR-30b-5p	Sh3kbp1
mmu-miR-128-3p	Rell2
mmu-miR-128-3p	Zfp423
mmu-miR-128-3p	Slc39a8
mmu-miR-30b-5p	Crem
mmu-miR-128-3p	LNC_001678
mmu-miR-128-3p	LNC_001741
mmu-miR-30b-5p	LNC_002639
mmu-miR-128-3p	LNC_003828
mmu-miR-128-3p	LNC_006576
mmu-miR-128-3p	LNC_006788

## Sheet: type
Supplementary Table S11. Nodes types in the 6yes9yes group.
Elovl1	up	gene
Fyn	up	gene
Cnot8	up	gene
Cacna1g	up	gene
Pde4d	up	gene
Il6st	up	gene
Ccl25	up	gene
Pnpla2	up	gene
Chm	up	gene
Arhgef9	up	gene
Chst10	up	gene
Tnni1	up	gene
Astn1	up	gene
Cd82	up	gene
Ndst3	up	gene
Cryz	up	gene
Itgam	up	gene
Smarca1	up	gene
Morc4	up	gene
Arpp21	up	gene
Rbfox2	up	gene
Pik3c3	up	gene
Emid1	up	gene
Zscan21	up	gene
Atp13a4	up	gene
Sh3kbp1	up	gene
Rell2	up	gene
Zfp423	up	gene
Slc39a8	up	gene
Crem	up	gene
LNC_001678	up	lnc
LNC_001741	up	lnc
LNC_002639	up	lnc
LNC_003828	up	lnc
LNC_006576	up	lnc
LNC_006788	up	lnc
mmu-miR-128-3p	down	miR
mmu-miR-128-3p	down	miR
mmu-miR-128-3p	down	miR
mmu-miR-128-3p	down	miR
mmu-miR-128-3p	down	miR
mmu-miR-128-3p	down	miR
mmu-miR-128-3p	down	miR
mmu-miR-128-3p	down	miR
mmu-miR-128-3p	down	miR
mmu-miR-128-3p	down	miR
mmu-miR-128-3p	down	miR
mmu-miR-128-3p	down	miR
mmu-miR-128-3p	down	miR
mmu-miR-128-3p	down	miR
mmu-miR-128-3p	down	miR
mmu-miR-128-3p	down	miR
mmu-miR-128-3p	down	miR
mmu-miR-128-3p	down	miR
mmu-miR-128-3p	down	miR
mmu-miR-128-3p	down	miR
mmu-miR-30b-5p	down	miR
mmu-miR-30b-5p	down	miR
mmu-miR-30b-5p	down	miR
mmu-miR-30b-5p	down	miR
mmu-miR-30b-5p	down	miR
mmu-miR-30b-5p	down	miR
mmu-miR-30b-5p	down	miR
mmu-miR-30b-5p	down	miR
mmu-miR-30b-5p	down	miR
mmu-miR-30b-5p	down	miR
mmu-miR-30b-5p	down	miR
mmu-miR-30b-5p	down	miR
mmu-miR-30b-5p	down	miR
mmu-miR-30b-5p	down	miR
mmu-miR-30b-5p	down	miR
mmu-miR-30b-5p	down	miR
