# Supplementary material for: Identifying lncRNA–miRNA–mRNA networks to investigate Alzheimer’s disease pathogenesis and therapy strategy
Source: Aging (Albany NY). 2020 Feb 7;12(3):2897–920. doi: 10.18632/aging.102785 (PMC7041741; doi:10.18632/aging.102785)
Supplement: Supplementary Table 12 [file aging-12-102785-s011..xlsx]

## Sheet: Genes in the ce network
Supplemental Table S12. Genes in the ceRNA network of the 6yes9no group
gene_name
Fam181a
Trim44
Rapgef3
Osbp2
Tm7sf2
Pcyox1
Dgcr2
Lars2
Dapp1
Slc11a2
Acsl3
Fat1
Recql
Usp2
Cep170
Mdfic
Bscl2
Chrnb3
Metap2
Matr3
Dhcr7
Golm1
Slc25a22
Ncoa4
Hexim2
Brpf1
Emc1
Cfap44
Inpp4a
Kif20a
Zbtb37
Srcap
Glb1l
Cdc42ep4
Tia1
Spint1
Cftr
Mei4
Sidt1
Clip1
Lrrc14
Ppp1r42
Paip1
Senp8
A830018L16Rik
Pear1
Ankrd13c
Dnm2
Zc2hc1a
Arid4b
St18
Vps53
Asph
Tom1
Itgam
Olah
Zfp668
Ercc1
Tcf12
Fam53c
Rcbtb2
Vps29
Vwa2
Epsti1
Lrrc4c
Rexo1
Tmem161a
Arx
Zgpat
Hcfc1
Tmem127
Sh2b3
Kif1b
Fut10
Shc1
Tsen34
Tead4
Mtf1
Cntnap2
Sec31a
Chrdl1
Frk
Src
Zfp27
Tmem135
Ncor2
Gm3002
Rassf2
Tspear
Gm3043
Paip2
Pdlim5
Npm1
Accs
Sytl3
Nr3c1
Apbb2
Klhdc10
Plaa
Clasp1
Rp2h
Exd1
Dysf
Brd4
Gm16039
Golim4
Myt1
Slc4a4
Zfp280d
Aurkaip1
Lrp8
Gsc2
Sbf2
Tmed2
Tmem229b
Dennd2c
Ercc2
Dvl2
Fmnl3
Cr2
Gas2
Tnfrsf13c
Topbp1
Slc45a4
Hsdl2
Mkln1
Bbs7
Pou2f1
Gng2
Tlx3
Kdm2b
Eif2b3
Mest
Aebp2
Zbtb5
Fam196b
Ikzf1
Npnt
Pkig
Enpp2
Ahcyl2
Gemin8
Slc35a2
Tmem230
Dnajb2
St5
Tbata
Rd3
Spats2l
Gm7233
Orc6
Hdac7
Arid1b
Ret
Thoc2
Zfp54
Nek6
Zbtb7b
Gse1
Stag3
Mark2
Gm13304
Klhl13
Wtap
Trmt10a
Ankra2
Tmco5
Akt1s1
Adrb3
Smco3
Adcyap1r1
Ptprc
Gucd1
Cobl
Adam12
Mtmr7
Dlg1
Endou
Snta1
Grip1
Myo10
Gga3
Eif4g2
Spock3
Arhgef9
Dedd
Zfp644
Pde7a
Gm5900
Glrx2
Tsku
Neb
Gmeb1
Fbxo6
Prx
Pnpla7
Dnm1
Trpv4
Pbrm1
Prkar1b
Trim45
Creb1
Epb4.1l4b
Ip6k2
Clcn7
Krcc1
Slc16a3
Gpr64
Il11ra1
Pttg1
Rabep1
CAAA01180111.1
H6pd
Rasgrp2
Etv1
Lrba
Phex
Plk3
S100a16
Caprin1
Adgb
Casz1
Nsfl1c
Col9a3
Prrg1
Rgs3
Dlec1
Rnf19b
Pitx2
Trmt61a
Aldoa
Foxp4
Atf7ip
Piga
Zc3hc1
Ttn
Gigyf2
Cept1
Cacnb4
Rbfox3
Klrb1b
Rnf6
Ehmt1
6030468B19Rik
Chdh
Supt7l
Kdm5c
Fam98c
Fiz1
Phf21b
Gpr114
Zeb2
Polk
Gtf3c2
Tmem150a
Agpat5
Elmo2
Cyth2
4930402H24Rik
Sfmbt2
Mgat4c
Arhgef10l
Tcf4
Lmntd1
Rwdd3
Rcor3
Polr1e
Kif3a
Agbl5
Capzb
43525
Crem
Rnf111
Sema3b
Smarca2
Zfp58
Svil
Evi5
Phldb1
Omp
Idua
Fbxo3
Carm1
Plcd4
Skap1
Epb4.1l3
Ltk
Stat5b
Hyal3
Fez1
Gm14326
Mlst8
Grin2c
Oaz2
Adra1a
Slc36a1
Ep400
Nasp
Cit
Rnf157
Dctn6
Sncaip
Med1
St6galnac6
Ptprr
Rab2b
Vcan
Adam8
Prr5l
Tmem254a
Zfp329
Rbm46
Cfh
Psd3
Tmem151a
Anks1b
Runx2
Morc2b
Dab2
St6gal1
Mfrp
Ttll5
Ncf1
Phka1
Zmym4
Rchy1
Uspl1
Gsk3a
Macrod2
2610015P09Rik
Mecom
Synpo
43717
Impdh1
Rfx5
Zfp446
Rbpj
Pde4c
Atg4b
Apol11b
Lsamp
Camk2b
Hnrnpk
Srrm1
Dst
Tbx22
Slco2b1
Ppp2r2d
Usp10
Stx6
Sh3bp2
Cd44
Apobec1
Anp32e
Arhgap6
Pex11b
Slc41a3
Gpr98
Vopp1
Gm16503
Eif5a
Fbn1
Csnk1a1
Parp3
Sox17
Usp46
Ckmt1
Camkv
Vwa3a
Thnsl2
Guk1
Madd
Gm5148
Frmd5
Stx11
Rbpms2
Glg1
AI661453
Mettl8
Klhdc4
Pdhx
Nek1
Rufy4
Alas1
Esr1
Qdpr
Pcdha4
Gramd2
Prc1
Hif1a
Slit2
Lyrm1
Bdnf
Sptb
Mboat7
Arpp19
Erbb2ip
D1Ertd622e
Ebf3
Cend1
Gemin5
Nrip2
Fam135a
Igsf5
Tardbp
Eif2b5
Fcer2a
Atp11c
Tars2
Scml2
Rab1
Enthd2
Oxsm
Smim1
Gm14435
Lgals9
Pls1
Fbxl5
Cxadr
Lcp1
Tank
Dtx2
Spire1
Ccdc67
Itgbl1
Satb2
Phtf1
Dido1
Srp9
Zfp740
Vwa5b1
Fam189b
Crybb1
Spsb2
Supt3
Nisch
Adora1
Nlgn3
Pign
Clec16a
Zfp661
Trim34a
Ddr1
Zmym3
Naalad2
Fgfr1op2
Zfp532
Olfr78
Dcun1d2
Arhgap19
Plin5
Ino80d
Naaa
Tsen54
9430015G10Rik
Hsf4
Taf6l
Kcnk13
Nktr
Stag1
Fbxl12
Cryzl1
Grb2
Etv4
Tal1
Dlk1
Atp11a
Cd36
Hacl1
Azin2
Gnas
Nedd9
Nr4a3
Slc29a3
Ergic3
Mettl22
Ccdc64
Amy1
Fn1
Dzip1l
Cttn
Tusc2
H2-K1
Mpc1
Rpl21
Abca8a
Hs6st2
Dap3
Scnn1a
Cad
B4galt5
Tmem216
Rangap1
Dnajc8
Wnt9a
Fmr1
Eya3
Ly6a
Dis3l
2210418O10Rik
Phc2
Acaca
Cpne1
Bbx
Xpo4
Ldb3
Tifa
Mrpl1
Nlrp6
Snx10
Plekha6
Ralgps2
Numb
Tgfbr2
Lrrfip1
Chil1
Bcl2l1
Prrc2c
Cbx3
43526
Taf4a
Lyar
Tmem131
Pigq
Mllt4
Tceal3
Clasp2
D930015E06Rik
Slc9a8
Kirrel3
Epn2
Pdss2
Mapk8ip3
Pex5l
Rrm2
Vamp4
Cgnl1
Wdr61
Slc25a13
Paics
Blcap
Kmt2a
Cd300a
Fgfr3
Rest
Bmf
Stk11
2410002F23Rik
Sema6d
Klf15
Nrf1
Dab2ip
Psap
Rnf32
Fstl5
Hipk1
Ung
Myom1
Immt
Kif26b
Lrrc74b
Tnrc6c
Npdc1
Ccl27a
Ino80e
Llgl2
Chchd3
Chtf8
Hrh3
Scoc
Rbm43
Prmt1
Zfp229
Psmc3
Mettl20
Pard3
Limch1
Mllt10
Irgm2
Fcf1
Jkamp
Cops7a
Usp32
Tead2
Dtnb
Ufl1
Vim
Tom1l1
Zfp287
Ephb4
Lrch2
Jarid2
Athl1
Itgb4
Wscd1
Camsap1
Frem1
Rnf26
Phc1
Cdk4
Cnot2
Sf1
1110059G10Rik
Mga
Acsl4
Mff
Slc4a5
Lrch3
Ccdc43
Trappc9
Tbck
Tlr11
Fmo5
Grin2b
Zfp827
Ssh1
Cd163
Stxbp5l
Poli
Thsd7a
Col6a2
Abcg3
Plac8
Mrvi1
Smpd4
Zfp429
Slc7a11
Patz1
Ssx2ip
Rint1
Mtif3
Gpr152
Slc6a12
Snrk
Hist1h2bq
Ugt1a7c
Fignl1
Limk1
Dpp6
Fgfr1
Lhx6
Xirp2
Atp9a
Gjb1
Ran
Pum2
Kcnmb4
5031439G07Rik
Abhd14a
Gm28042
Homer1
Sema4c
Ptch1
Rab17
Ank2
Mgll
Il10ra
Plin2
Zfp467
Tbcel
Pigk
Fam220a
Usp13
Zfp629
Zkscan1
Tln2
Stau1
Duxbl3
Far1
Thtpa
Cd276
Setd5
Atp8a1
Naa35
Mapre2
Fbxl19
AU040320
Tbc1d14
Vps8
Zfp85
Snx13
Ndufs2
Stk36
Ube2c
Chpt1
Nod2
Txndc9
Gpr146
Abi2
Myadm
Rpgr
Trim2
Akap1
Acacb
Cadps2
Stau2
Dnajb11
Abr
Lphn3
Mum1l1
Sun2
Xlr
Ctage5
Terf2
Ccdc33
Rsrc1
Plch2
Atrx
Egfr
Sec61a2
Gstm4
Ikzf2
Celf1
Lrrc48
Tpd52l2
Pfdn5
Mro
Pld3
Ntng1
Atp1a2
Acsl6
Tmem63a
Fancc
Wnt11
Crb3
Akap13
Tead1
Csf1r
Tpm1
Cacna1c
Rdh16
Morf4l1
Ambra1
Sgip1
Slc19a3
Myo5a
Spag9
Celf5
Tfpi
Etl4
Dot1l
Tfe3
Irak1
Pecam1
Onecut2
Cdkl3
Sbf1
Kctd20
Dok7
Sorbs2
Poc1b
Pcdh15
Mpz
Znrf1
Prickle4
Trpc2
Ube2v2
Rcor1
Wdr76
Fuca2
Tmprss4
Kdm5a
Trmt1
Cacna2d4
43531
Man2c1
Hnrnpr
Tbc1d4
Cacna1h
Siglech
Pole4
Rbm4
Cage1
Odf2
Rad9b
Tcf19
Rnft2
Trf
Npb
Bnc2
Tnk2
Ttbk2
Tec
Map4k5
Stard9
Cnot1
Cox7a2l
Susd2
Zmym5
Cyp1a2
Sla2
2810474O19Rik
Fggy
Hps5
Epb4.1
Rasgrp4
Macf1
Fam171a1
Nrp2
Lpar1
Col4a5
Sema4a
Agbl2
Arhgef2
Dram2
Rnf20
Klf4
Smox
Usp43
Cap2
Prdx2
Pcsk6
Arhgap1
Rcc2
Clcn2
Slc39a11
Mapk8ip1
Ranbp1
Adamts1
Sptbn4
Parva
Ash2l
Triobp
Ak1
Cryz
43714
Slc35a3
Nmnat3
Mrgprf
Polr2j
Stat5a
Arap1
Cpne4
Rbm47
Efr3a
Fcho1
Suv420h1
Nod1
Cd33
Als2
C87436
Glrb
Psip1
Kcnmb2
Cnppd1
Fam118b
Lemd1
Tcf7l2
Mcmdc2
Cfap54
Dcun1d4
Mpp3
Eda
Scn9a
Trmt112
5430435G22Rik
Mina
Nckipsd
Acox1
Map9
Ccdc80
Scfd2
Jmjd1c
BC055324
Fndc3b
Brd3
B4galt2
43710
Tbx3
Wwox
Fbxo27
Plekha1
Micu1
Rpusd3
Nek7
Mocs2
Pi4ka
Rnaseh2a
Nxt2
P2rx7
Pdcl
Irf4
Prpf3
Fbxo40
Cnot7
Ttc25
Lancl1
Rnf10
Sgce
Eqtn
Rpl13a
Tnip2
Gmppa
Tdrd1
Gm10419
Fam229b
Pik3cd
Rbak
Morf4l2
Smad2
Setd1a
Il15ra
Plscr2
Ciz1
Tead3
Hap1
Ifitm6
Atp6v1b1
Alg6
Neu2
Cobll1
Egr2
Bud31
Dusp26
Ttc6
Rtn4
Gm10600
Cyp2e1
Spag1
Cfap70
Nkd2
Mlh3
Ddx39b
Tcn2
Mri1
Eno1
Aamdc
A430093F15Rik
Phka2
Kansl1l
Ap4b1
Eno3
Col10a1
Fopnl
Lzts2
Gm2163
1110032A03Rik
Zfp879
Psmg1
Lrrc23
Lingo2
Exosc1
Gtf2ird1
Cant1
Rai2
Postn
Dmrtc1a
Ndufv1
Cd37
Rgs11
Pcdhgb1
Gm14434
Aspscr1
Osm
Fhit
Mgme1
Pacsin3
Pdzk1
Klc3
Mta1
Maf1
Fut7
Gpr18
Alkbh6
Col11a2
Slc8b1
Tnnt1
Gyg
Mtif2
Tmsb4x
Rad50
Rab7
Gc
Btn2a2
Tpx2
Stra6
Exoc1
PCDHGA9
Bzrap1
Xpa
Slc11a1
Cabp1
Ints10
Zfp931
Il23r
Tap1
Tmem240
Ehmt2
Adssl1
Mas1
Nudt9
Acot7
1700029I15Rik
Ccdc136
H2-T24
Dmrtb1
Impg2
Plcd3
Ppp1r10
C1qtnf5
Radil
Vav1
Yipf3
Phf23
Dock7
Trim34b
Tlr3
Pemt
Ecscr
Ndst4
Plscr5
Rhbdd3
Cep295
Pex3
Ubap2
Calml4
Hnrnpf
Clu
Cyfip1
Arhgef25
Hagh
Fam111a
Ybx2
E130114P18Rik
Tdrd7
Npr2
Pfkfb1
Rwdd2a
Eci3
Plk4
Polr3gl
Prg4
1700015F17Rik
Trim13
Acadvl
Slc38a11
Mamdc4
Ggcx
Myo7a
Fetub
Tle6
Rbm12b1
Naip2
1700008O03Rik
Gpr115
Cthrc1
Dock11
Zkscan6
Klrb1a
Eif4enif1
Tac2
4930578G10Rik
Ints8
Apbb1
Dupd1
Prss36
Cisd3
Pik3r4
Cryba4
Asns
Thoc6
Sgk1
Rpl41
Capg
Cited1
Oaz1
Unc50
Apoc1
Lao1
Med12
Zmynd15
Ppdpf
Lgals3
Zfp57
R3hcc1
Pon1
Lgals3bp
Fcgbp
Daxx
Eci2
Wbscr22
Atp1a4
Ecm1
Upk3bl
Rpl29
Cd209d
Palld
Gapdh
Spag8
Clta
Clec10a
Fxyd1
Gtsf1l
Prl
Rpl18
Gpr19
Nrg2
Coro1a
Pth1r
Gm14685
S100a9
Adcy4
Prdx5
Fancb

## Sheet: All GO terms
Supplemental Table S12. All Go pathways in the 6yes9no group
Category	Term	Count	%	PValue	Genes	List Total	Pop Hits	Pop Total	Fold Enrichment	Bonferroni	Benjamini	FDR
GOTERM_CC_DIRECT	GO:0005737~cytoplasm	484	0.301177	5.28681e-23	ALS2, RPL18, RBPMS2, CTHRC1, FHIT, RANGAP1, CITED1, PHTF1, PLS1, SMOX, ADAM8, HIST1H2BQ, NCF1, PIK3CD, SPAG1, PTPRR, SPIRE1, EXD1, MECOM, MARK2, SPAG9, TMEM135, SPAG8, RCC2, TRAPPC9, ADAMTS1, RALGPS2, ARHGEF25, PTH1R, CHCHD3, BCL2L1, DIDO1, PDSS2, NAA35, RAB7, TMEM127, HEXIM2, EFR3A, CASZ1, RCHY1, CDC42EP4, PPP1R42, ARHGEF10L, PPP2R2D, SGIP1, DVL2, KIF3A, PAIP2, PAIP1, TGFBR2, ACACA, GAS2, PCDH15…	1001	6631	19662	1.43371	3.47872e-20	3.47872e-20	7.90678e-20
GOTERM_MF_DIRECT	GO:0005515~protein binding	343	0.213437	3.50978e-22	ALS2, CTHRC1, PDLIM5, STAT5A, STAT5B, REST, RADIL, WTAP, ZNRF1, ADORA1, CITED1, BDNF, MEI4, CD44, DNAJB11, GRIN2B, GRIN2C, PLS1, STAG3, PATZ1, ADAM8, FIZ1, WWOX, PITX2, POLK, DAB2IP, ZC3HC1, RCOR3, RAN, NCF1, RCOR1, ZFP467, MECOM, TANK, SPAG9, SPAG8, CD36, TRAPPC9, RAB17, ADAMTS1, GIGYF2, KIF26B, KCNMB4, TDRD7, ARHGEF25, CHCHD3, BCL2L1, CACNB4, MYT1, CAPZB, PEX5L, EPHB4, NAA35, RAB7, PLAA, TAL1, …	922	4092	17446	1.58607	3.74845e-19	3.74845e-19	5.59185e-19
GOTERM_CC_DIRECT	GO:0005634~nucleus	408	0.253884	2.56091e-12	ALS2, RPL18, FHIT, AURKAIP1, RANGAP1, REST, WTAP, CITED1, INTS8, BRPF1, WDR76, PHTF1, STAG3, SMOX, PATZ1, HIST1H2BQ, STAG1, RCOR3, RCOR1, MED12, MECOM, MARK2, SPAG8, RCC2, ZFP280D, ST18, PTH1R, CHCHD3, BCL2L1, DIDO1, ARX, XLR, ADRB3, HEXIM2, CASZ1, RCHY1, TCF4, ARHGEF10L, DVL2, KLF15, ACACB, SFMBT2, DUSP26, WDR61, RGS3, CCL27A, RWDD3, TNK2, PHF23, DAXX, YBX2, EVI5, USP10, BRD4, HSF4, ATF7IP, MRI1…	1001	6019	19662	1.33146	1.68511e-09	8.42553e-10	3.83008e-09
GOTERM_CC_DIRECT	GO:0005856~cytoskeleton	101	0.0628489	1.68576e-08	PRC1, S100A9, RANGAP1, ANK2, STARD9, CEP295, MTA1, TOPBP1, SPIRE1, DCTN6, TXNDC9, MARK2, FOPNL, SPAG8, RCC2, CLIP1, DST, NEK6, NEK7, KIF26B, SPTB, COBL, SSH1, BBS7, TMEM216, NEK1, AKAP13, NEDD9, BCL2L1, DIDO1, CAPZB, SRC, MACF1, CEP170, NPM1, CLASP1, CLASP2, SSX2IP, CDC42EP4, PPP1R42, HAP1, TEC, AGBL2, DVL2, KIF3A, AGBL5, GAS2, MYO10, PLK4, CORO1A, POC1B, PLK3, DZIP1L, MAP9, LZTS2, TLN2, MYO7A, T…	1001	1113	19662	1.78246	1.10922e-05	3.69742e-06	2.52117e-05
GOTERM_CC_DIRECT	GO:0005654~nucleoplasm	153	0.0952067	2.70892e-08	MORF4L1, AURKAIP1, PRC1, XPO4, STAT5A, STAT5B, MORF4L2, RBM4, BBX, CBX3, MAF1, CNOT7, WTAP, 1110032A03RIK, PACSIN3, MDFIC, TIA1, STARD9, TARDBP, DNAJC8, SLC25A22, TRIM45, PSIP1, STAG3, SRRM1, PATZ1, HIST1H2BQ, STAG1, POLK, LYRM1, SATB2, RAN, RCOR1, DDX39B, FMR1, MED12, SPAG1, MTA1, ARID1B, MECOM, RNASEH2A, HNRNPR, MTF1, GTF2IRD1, MLLT10, MGA, CELF1, RNF20, SMARCA2, NEK6, NEK7, SSH1, GRB2, SETD1A,…	1001	1935	19662	1.55312	1.78245e-05	4.45616e-06	4.05137e-05
GOTERM_CC_DIRECT	GO:0016020~membrane	435	0.270686	1.02311e-07	RPL18, ALS2, SLC9A8, PEAR1, VPS53, RANGAP1, GRIN2B, GRIN2C, GNG2, ADAM8, NCF1, MED12, PTPRR, CCDC136, SPIRE1, CYP2E1, CYP1A2, ERGIC3, MARK2, TMEM131, TMEM135, RCC2, GGCX, RALGPS2, ARHGEF25, PTH1R, CHCHD3, BCL2L1, PRRC2C, RAB7, ADRB3, SLC29A3, TMEM127, IMPG2, PEMT, EFR3A, CDC42EP4, SGIP1, DVL2, IL23R, MGAT4C, TGFBR2, ATP11A, MPC1, PCDH15, GAS2, ATP11C, ACACB, OLFR78, RGS3, CD300A, SYTL3, TNK2, RTN…	1001	6998	19662	1.22098	6.73185e-05	1.34641e-05	0.000153013
GOTERM_MF_DIRECT	GO:0046872~metal ion binding	234	0.14561	2.03769e-06	ADCY4, PDLIM5, S100A9, GM28042, POSTN, REST, ZNRF1, ZFP85, CD209D, ZGPAT, GRIN2B, ZFP931, FSTL5, PLS1, PATZ1, ADAM8, FIZ1, POLK, POLI, ZFP329, ZC3HC1, ZFP467, ZFP629, CYP2E1, CYP1A2, MECOM, TANK, MARK2, ZFP827, MTF1, MLLT10, ZFP280D, FBXL5, ADAMTS1, ST18, NEK6, NEK7, HACL1, FCER2A, ENPP2, NEK1, AKAP13, MYT1, DIDO1, THTPA, MACF1, CASZ1, LHX6, RCHY1, TDRD1, AGBL2, AEBP2, IKZF2, IKZF1, AGBL5, TRIM34…	922	3355	17446	1.31974	0.00217389	0.00108753	0.00324643
GOTERM_CC_DIRECT	GO:0043231~intracellular membrane-bounded organelle	69	0.0429363	2.79605e-06	ALS2, TM7SF2, ACOX1, CLTA, SEC31A, AURKAIP1, PRDX5, RANGAP1, CNOT1, PEX3, MAF1, DAB2, CTTN, UGT1A7C, EVI5, CISD3, POLK, RET, POLI, MTA1, CYP2E1, CYP1A2, MECOM, SLC7A11, PNPLA7, CD36, H6PD, VCAN, EDA, NEU2, SMARCA2, NEK6, EPN2, GGCX, GLG1, VPS29, FRK, CLU, LLGL2, GLRX2, RAB7, FMO5, METTL22, TMED2, PLIN2, DHCR7, TAP1, CASZ1, POU2F1, ACSL4, ACSL3, GAPDH, ACSL6, EIF4ENIF1, ASPSCR1, ECI2, ATP1A4, ATP1…	1001	751	19662	1.80469	0.00183811	0.000306587	0.00418161
GOTERM_CC_DIRECT	GO:0043234~protein complex	59	0.0367137	8.32869e-06	ALS2, RTN4, ADCY4, CAD, PEX3, REST, CXADR, NOD2, PRMT1, CD44, STRA6, USP10, ARHGEF2, RAN, TLE6, DDX39B, ESR1, CFTR, PRPF3, CDK4, TANK, UFL1, CD36, MLLT10, SPATS2L, CARM1, SRCAP, SPTB, PARVA, ALDOA, PARD3, GRB2, STK11, CLU, NR3C1, TPM1, TAL1, RGS11, AKT1S1, COL6A2, SSX2IP, RUNX2, IKZF1, NASP, CRB3, SMAD2, DOT1L, PEX11B, CORO1A, NEB, RASSF2, CACNA1C, RBPJ, APBB1, DNM1, TRMT112, RNF111, SNTA1, DNM2	1001	628	19662	1.84538	0.00546531	0.000782593	0.0124554
GOTERM_BP_DIRECT	GO:0006351~transcription, DNA-templated	142	0.0883618	1.12633e-05	MORF4L1, FHIT, STAT5A, STAT5B, MORF4L2, BBX, CBX3, CNOT2, CNOT1, REST, MAF1, CNOT7, CITED1, ZGPAT, MDFIC, TARDBP, PHTF1, PSIP1, FIZ1, SATB2, ZFP329, RCOR3, RCOR1, ZFP467, MED12, ZFP629, MTA1, MECOM, ZFP827, KDM2B, HIF1A, MTF1, ZFP280D, GTF2IRD1, MGA, ST18, SMARCA2, TFE3, ONECUT2, CHCHD3, MYT1, DIDO1, ARX, TAL1, HNRNPK, HEXIM2, TEAD4, CASZ1, PBRM1, RNF10, LHX6, SUPT7L, TCF4, RUNX2, AEBP2, IKZF2, I…	957	1885	18082	1.42335	0.0417468	0.0417468	0.020805
GOTERM_MF_DIRECT	GO:0008017~microtubule binding	27	0.0168012	2.00067e-05	PRC1, S100A9, KLC3, MACF1, STARD9, CAMSAP1, TRPV4, CLASP1, CLASP2, GAPDH, SGIP1, ARHGEF2, KIF3A, FMR1, GAS2, CFAP44, SPAG8, KIF1B, RCC2, CLIP1, MAPRE2, AKAP1, DST, DNM1, KIF20A, DNM2, KIF26B	922	200	17446	2.55446	0.0211407	0.00709714	0.0318702
GOTERM_MF_DIRECT	GO:0003677~DNA binding	138	0.0858727	2.07778e-05	STAT5A, STAT5B, BBX, REST, ZGPAT, WDR76, TARDBP, PHTF1, PSIP1, SRRM1, ORC6, PATZ1, HIST1H2BQ, PITX2, POLK, SATB2, POLI, ZFP329, RCOR3, RBFOX3, CHTF8, RCOR1, ZFP467, ZFP629, MTA1, TOPBP1, ARID1B, MECOM, ZFP827, KDM2B, HIF1A, MTF1, ZFP280D, GTF2IRD1, MGA, ST18, SMARCA2, EP400, SSH1, TFE3, ONECUT2, MYT1, ARX, TAL1, POLE4, HNRNPK, TEAD4, NPM1, CASZ1, PBRM1, RNF10, LHX6, TCF4, RUNX2, AEBP2, IKZF2, IKZ…	922	1847	17446	1.41376	0.0219465	0.00553237	0.0330984
GOTERM_CC_DIRECT	GO:0001726~ruffle	17	0.0105785	2.22461e-05	ALS2, MYO5A, COBL, TLN2, CYTH2, PALLD, MYADM, MKLN1, MYO10, CTTN, ARHGAP1, PECAM1, CLIP1, CYFIP1, GNAS, CIT, LCP1	1001	95	19662	3.51495	0.0145315	0.00182809	0.0332654
GOTERM_MF_DIRECT	GO:0005085~guanyl-nucleotide exchange factor activity	23	0.0143121	2.41734e-05	ALS2, ARHGEF2, RALGPS2, ABR, RPGR, ARHGEF25, MADD, PSD3, AKAP13, CYTH2, DOCK7, ARHGEF9, DENND2C, VAV1, SBF1, RASGRP4, RASGRP2, RAPGEF3, ST5, EIF2B3, DOCK11, ARHGEF10L, EIF2B5	922	156	17446	2.78977	0.0254871	0.0051502	0.0385065
GOTERM_BP_DIRECT	GO:0045893~positive regulation of transcription, DNA-templated	55	0.0342246	3.17008e-05	REST, SKAP1, CITED1, BRPF1, DAB2, MDFIC, PATZ1, SOX17, KDM5A, PITX2, ATF7IP, RET, EGR2, ESR1, MED12, MECOM, HIF1A, MTF1, TMSB4X, WNT11, RNF20, SMARCA2, MED1, KMT2A, TFE3, TCF7L2, SRC, TRF, TAL1, NPM1, PBRM1, ETV1, RNF10, TCF4, RUNX2, ETV4, ERCC2, DVL2, TBX3, IKZF1, CREB1, SMAD2, NR4A3, KLF15, RNF6, ZFP287, EBF3, PTCH1, IRF4, RBPJ, TCF12, APBB1, ARAP1, KLF4, RNF111	957	576	18082	1.80416	0.113098	0.0582454	0.0585455
GOTERM_CC_DIRECT	GO:0005667~transcription factor complex	31	0.0192902	4.09593e-05	CREM, TFE3, TCF7L2, MINA, TAL1, TEAD4, POU2F1, SOX17, TCF4, RUNX2, PITX2, ATF7IP, SATB2, IKZF1, RCOR3, TBX3, CREB1, RCOR1, TEAD1, TEAD2, SMAD2, TEAD3, NR4A3, CDK4, EYA3, NRF1, HIF1A, MGA, RBPJ, TCF12, KLF4	1001	267	19662	2.28057	0.0265918	0.00299016	0.0612399
GOTERM_CC_DIRECT	GO:0005938~cell cortex	21	0.0130676	4.1872e-05	DVL2, COBL, PARD3, USP2, MYO7A, TLE6, ITGB4, NEDD9, AKAP13, SPIRE1, ARHGEF9, DAXX, MKLN1, CTTN, MYO10, HNRNPK, MACF1, CLASP1, CLASP2, DST, COL10A1	1001	144	19662	2.86451	0.0271763	0.00275144	0.0626042
GOTERM_CC_DIRECT	GO:0005829~cytosol	128	0.07965	5.82625e-05	ALS2, FHIT, PDLIM5, STAT5A, STAT5B, VPS53, RANGAP1, REST, MAF1, ZNRF1, CITED1, GSTM4, TBC1D14, MLST8, WWOX, NCF1, MADD, QDPR, SPIRE1, SPAG9, HIF1A, NEU2, GC, FGFR1, SSH1, GRB2, STK11, CLU, AKAP13, BCL2L1, ATP6V1B1, PEX5L, SRC, RAB7, OAZ2, AKT1S1, HNRNPK, OAZ1, TTBK2, NPM1, EFR3A, ARHGEF10L, PPP2R2D, TDRD1, TEC, DVL2, AGBL2, ASPSCR1, ABR, MOCS2, KIF3A, S100A16, AGBL5, TGFBR2, OMP, ACACA, CRYZ, VAV…	1001	1784	19662	1.40932	0.0376122	0.00347919	0.0871001
GOTERM_BP_DIRECT	GO:0016569~covalent chromatin modification	31	0.0192902	7.74278e-05	MORF4L1, KMT2A, MORF4L2, HCFC1, WBSCR22, CBX3, NR3C1, DAXX, ASH2L, PBRM1, BRD4, KDM5A, KDM5C, AEBP2, SATB2, BRD3, EHMT1, IKZF1, JARID2, RCOR1, ANP32E, EHMT2, ATRX, EYA3, KDM2B, JMJD1C, CARM1, APBB1, RNF20, EP400, HDAC7	957	266	18082	2.20199	0.254092	0.0930951	0.142938
GOTERM_BP_DIRECT	GO:0006355~regulation of transcription, DNA-templated	161	0.100185	8.39972e-05	MORF4L1, FHIT, STAT5A, STAT5B, MORF4L2, BBX, CBX3, CNOT2, CNOT1, REST, PTTG1, MAF1, CNOT7, ZFP85, CITED1, ZGPAT, ZFP931, MDFIC, TARDBP, PHTF1, PSIP1, PATZ1, FIZ1, PITX2, SATB2, ZFP329, RCOR3, RCOR1, ZFP467, MED12, ZFP629, MTA1, MECOM, ZFP827, KDM2B, HIF1A, MTF1, GTF2IRD1, ZFP280D, 2210418O10RIK, MGA, ST18, RNF20, SMARCA2, TFE3, ONECUT2, CHCHD3, MYT1, ARX, TAL1, HNRNPK, HEXIM2, TEAD4, CASZ1, PBRM1…	957	2279	18082	1.3348	0.272417	0.0764281	0.155056
GOTERM_CC_DIRECT	GO:0042995~cell projection	61	0.0379582	8.62536e-05	RTN4, TTLL5, CAD, D1ERTD622E, MKLN1, CTTN, CNTNAP2, TRPV4, KIRREL3, ANKS1B, DAB2IP, RPGR, FMR1, LDB3, PDE4C, PALLD, FOPNL, RAB17, CLIP1, GNAS, SGCE, DST, LCP1, COBL, SSH1, TSPEAR, BBS7, TMEM216, VIM, ABI2, CYTH2, AZIN2, CFAP54, C1QTNF5, HNRNPK, MACF1, SORBS2, RASGRP2, SCN9A, ODF2, SSX2IP, CLASP2, SCNN1A, HAP1, SYNPO, AGBL2, GLRB, KIF3A, DOCK7, LRRC48, CAPRIN1, MYO10, RNF6, POC1B, SVIL, DZIP1L, CY…	1001	712	19662	1.68284	0.0551766	0.00471861	0.12892
GOTERM_CC_DIRECT	GO:0014069~postsynaptic density	28	0.0174234	8.87287e-05	RTN4, ALS2, PDLIM5, CABP1, NR3C1, ADORA1, SRC, HNRNPK, MACF1, ANK2, GRIN2B, SORBS2, GRIN2C, CAMK2B, SYNPO, DLG1, ANKS1B, ARHGEF2, CAP2, FMR1, PSD3, HOMER1, SEMA4C, PTCH1, LRP8, CACNA1C, DST, DNM2	1001	239	19662	2.3012	0.0567143	0.00448117	0.132618
GOTERM_CC_DIRECT	GO:0048471~perinuclear region of cytoplasm	59	0.0367137	0.000127873	SEC31A, RBM4, MRVI1, VPS53, PRDX5, RANGAP1, MAF1, DAB2, BDNF, ANK2, ARHGAP1, PUM2, RAPGEF3, DLG1, STX6, EGFR, SGK1, LIMK1, FMR1, LDB3, ESR1, SPIRE1, CDK4, RAD50, SPAG9, ANKRD13C, ATP9A, FBXL5, GNAS, SRCAP, DST, GC, FGFR1, COBL, FGFR3, USP2, CLU, VIM, AKAP13, PEX5L, AZIN2, SRC, TRF, NXT2, SLC11A2, SORBS2, FAT1, ACSL3, HAP1, ASPSCR1, AK1, TPD52L2, PSMC3, CYFIP1, PTCH1, MAPK8IP1, PHEX, APBB1, DNM2	1001	692	19662	1.67471	0.0807025	0.00599237	0.191072
GOTERM_MF_DIRECT	GO:0003682~chromatin binding	45	0.028002	0.000133259	MORF4L1, KMT2A, STAT5B, HCFC1, NR3C1, REST, MLH3, TCF7L2, CITED1, YBX2, ARX, TAL1, PSIP1, POU2F1, PBRM1, PATZ1, BRD4, TCF4, KDM5A, RUNX2, PHC1, PITX2, STAG1, EGFR, SATB2, EGR2, BRD3, JARID2, FMR1, MED12, ESR1, MTA1, SMAD2, PLAC8, ATRX, EYA3, PHF21B, RBPJ, APBB1, RNF20, SMARCA2, HDAC7, EP400, NCOR2, MED1	922	466	17446	1.82722	0.132665	0.0234425	0.212099
GOTERM_MF_DIRECT	GO:0047485~protein N-terminus binding	18	0.0112008	0.000136148	MORF4L1, ACOX1, DAB2IP, TDRD7, SLA2, MYO7A, PDLIM5, CLU, EIF5A, PCDH15, DAXX, TPM1, GRIN2C, NPM1, RBPJ, NCOR2, ERCC2, FEZ1	922	117	17446	2.91106	0.135337	0.0205594	0.216693
GOTERM_BP_DIRECT	GO:0042127~regulation of cell proliferation	27	0.0168012	0.000175879	FGFR1, FRK, APOBEC1, NR3C1, SRC, MINA, ARX, TAL1, DHCR7, PLCD3, SHC1, TEC, PITX2, EGFR, SGK1, TBX3, JARID2, PRG4, TGFBR2, TEAD1, MECOM, CDK4, HIF1A, PTCH1, TNK2, RBPJ, KLF4	957	227	18082	2.24736	0.486207	0.124699	0.324406
GOTERM_BP_DIRECT	GO:0045944~positive regulation of transcription from RNA polymerase II promoter	80	0.0497813	0.000181298	STAT5A, ARID4B, STAT5B, MORF4L2, TLR3, ZEB2, CNOT7, SKAP1, DAXX, NOD2, ASH2L, PSIP1, PATZ1, BRD4, SOX17, HSF4, RAPGEF3, TNIP2, WWOX, PITX2, EGFR, SATB2, DAB2IP, ARHGEF2, EGR2, GMEB1, ZFP467, ESR1, MED12, MECOM, OSM, SPAG8, HIF1A, MTF1, MLLT10, AAMDC, CARM1, SMARCA2, MED1, FGFR1, KMT2A, CREM, TFE3, ONECUT2, NR3C1, MYT1, TCF7L2, TAL1, SLC11A1, HNRNPK, TEAD4, POU2F1, ETV1, RNF10, TCF4, RUNX2, ETV4, …	957	995	18082	1.51915	0.496643	0.108107	0.334386
GOTERM_CC_DIRECT	GO:0043005~neuron projection	40	0.0248906	0.000217581	MYO5A, RTN4, ALS2, GRIP1, PDLIM5, ADCYAP1R1, CLU, VIM, KLC3, NR3C1, LPAR1, CXADR, DAXX, SRC, STAU1, ACOT7, GRIN2B, HRH3, RASGRP2, HAP1, ENO1, DLG1, SGK1, KIF3A, LIMK1, SLC6A12, AK1, FMR1, QDPR, ESR1, ATP1A2, HOMER1, UFL1, MYO10, KIF1B, CHRNB3, CYFIP1, MAPK8IP3, AHCYL2, MAPK8IP1	1001	420	19662	1.8707	0.133405	0.00950018	0.324914
GOTERM_MF_DIRECT	GO:0001077~transcriptional activator activity, RNA polymerase II core promoter proximal region sequence-specific binding	30	0.018668	0.00022516	STAT5A, TFE3, STAT5B, ONECUT2, NR3C1, TCF7L2, HNRNPK, TEAD4, ETV1, PATZ1, TCF4, RUNX2, PITX2, ZBTB7B, SATB2, EGR2, GMEB1, ZFP467, ESR1, TEAD1, SMAD2, NR4A3, NRF1, HIF1A, MTF1, EBF3, IRF4, RBPJ, TCF12, KLF4	922	270	17446	2.10243	0.213764	0.0296149	0.358126
GOTERM_MF_DIRECT	GO:0003779~actin binding	35	0.0217793	0.000239286	GC, MYO5A, TRIOBP, COBL, SSH1, TLN2, MYO7A, PDLIM5, TPM1, CAPZB, NOD2, MACF1, PLS1, TRPV4, PPP1R42, SCNN1A, SYNPO, FMNL3, CAP2, SPTBN4, SPIRE1, PALLD, CORO1A, MYO10, XIRP2, LIMCH1, SVIL, CAPG, CYFIP1, TMSB4X, DST, LCP1, PARVA, SPTB, SNTA1	922	338	17446	1.95937	0.225539	0.0279992	0.380554
GOTERM_CC_DIRECT	GO:0005794~Golgi apparatus	89	0.0553817	0.000246101	SLC9A8, NDST4, AU040320, UNC50, VPS53, POSTN, SLC35A2, SLC35A3, CANT1, ST6GALNAC6, TMEM230, CTTN, EVI5, CD44, MDFIC, TBC1D14, STARD9, CNTNAP2, WWOX, GOLM1, DLG1, STX6, EGFR, H2-K1, ARHGEF2, RPGR, LIMK1, NCF1, FUT10, ESR1, SPIRE1, TOPBP1, MECOM, CHPT1, ERGIC3, XPA, CD36, TRAPPC9, ATP9A, VAMP4, SGCE, GNAS, SRCAP, EPN2, GLG1, MYO5A, FGFR3, SLC39A11, FUT7, GRB2, ENPP2, LRBA, AZIN2, RAB7, METTL22, TME…	1001	1190	19662	1.46905	0.14952	0.0100711	0.367429
GOTERM_MF_DIRECT	GO:0019894~kinesin binding	10	0.00622266	0.000282282	SPAG9, KIF3A, PRC1, MAPK8IP3, LRP8, KLC3, MAPK8IP1, DAXX, NEK6, STAU2	922	42	17446	4.50522	0.260307	0.029702	0.44879
GOTERM_MF_DIRECT	GO:0042803~protein homodimerization activity	66	0.0410696	0.000313181	ALS2, RBPMS2, MYO7A, DAXX, CD209D, CITED1, CANT1, MFF, ACOT7, NOD1, GSTM4, FGFR1OP2, MGLL, DMRTC1A, LRRFIP1, SLC8B1, IRAK1, DAB2IP, FMR1, QDPR, EXD1, MECOM, DMRTB1, SLIT2, XPA, SBF2, CARM1, DST, FGFR1, KMT2A, ASNS, NR3C1, BCL2L1, TPM1, ADRB3, SLC11A1, TAP1, NPM1, EFR3A, ENO3, CAMK2B, MYOM1, RCHY1, TCF4, ACSL6, TERF2, CSF1R, ENO1, ZBTB7B, ADSSL1, CR2, S100A16, IKZF2, SMAD2, NR4A3, FOXP4, GJB1, PEX…	922	798	17446	1.56497	0.284326	0.029954	0.497801
GOTERM_CC_DIRECT	GO:0030425~dendrite	44	0.0273797	0.000359245	MYO5A, ALS2, ADCY4, COBL, CLCN2, GRIP1, HCFC1, ABI2, EIF5A, RANGAP1, MAF1, PEX5L, ADORA1, AZIN2, STAU2, STAU1, GLRX2, BDNF, SORBS2, CAMK2B, PUM2, HAP1, KIRREL3, SYNPO, GLRB, RET, DAB2IP, NCF1, FMR1, NLGN3, HOMER1, HNRNPR, CAPRIN1, PLK3, RAB17, CACNA1H, MAPK8IP3, GNAS, LRP8, SGCE, TNK2, MAPK8IP1, CACNA1C, FEZ1	1001	490	19662	1.7638	0.210555	0.0138111	0.53593
GOTERM_CC_DIRECT	GO:0005913~cell-cell adherens junction	32	0.0199125	0.00036743	RTN4, ALDOA, PARD3, PDLIM5, HCFC1, ABI2, RANGAP1, CAPZB, SRC, CTTN, HNRNPK, ARHGAP1, NUMB, RANBP1, LRRFIP1, SSX2IP, DLG1, ENO1, EGFR, COBLL1, DAB2IP, RAN, PI4KA, TXNDC9, MARK2, EIF4G2, CAPG, UBAP2, PAICS, GIGYF2, PARVA, EPN2	1001	316	19662	1.9891	0.214797	0.0133442	0.54811
GOTERM_MF_DIRECT	GO:0019901~protein kinase binding	41	0.0255129	0.00043633	MYO5A, PRC1, GRB2, VIM, CNPPD1, BCL2L1, CACNB4, TTN, DAXX, TCF7L2, SKAP1, SRC, NOD2, CD44, TBC1D14, NPM1, TRPV4, CAMK2B, TNIP2, ACSL3, DLG1, EGFR, DVL2, PTPRC, DAB2IP, ZC3HC1, PTPRR, TPX2, NR4A3, HIF1A, TOM1L1, RCC2, GSK3A, DOK7, MAPK8IP1, AKAP1, HDAC7, DNM1, NEK6, KIF20A, DNM2	922	434	17446	1.78755	0.372557	0.0380972	0.692908
GOTERM_MF_DIRECT	GO:0017124~SH3 domain binding	17	0.0105785	0.000471477	DAB2IP, NCF1, GRB2, LANCL1, ABI2, PTTG1, ELMO2, ARHGAP6, TOM1L1, PLSCR2, ARHGAP1, NCKIPSD, CIT, ADAM12, DNM2, SGIP1, SH3BP2	922	118	17446	2.72604	0.395683	0.0380019	0.748526
GOTERM_CC_DIRECT	GO:0005769~early endosome	25	0.0155566	0.000538732	STX6, ALS2, MYO5A, RET, ATP11A, TLR3, CFTR, TRF, VPS8, SLC11A2, TMEM230, CORO1A, DYSF, NISCH, TMEM127, RABEP1, TRAPPC9, ATP9A, NUMB, RAB17, CNTNAP2, TOM1, USP10, EQTN, SNX13	1001	226	19662	2.17283	0.298533	0.0184891	0.802688
GOTERM_CC_DIRECT	GO:0030018~Z disc	17	0.0105785	0.000552726	ALDOA, PDLIM5, LDB3, TTN, PALLD, HOMER1, CAPZB, NEB, ANK2, GRIN2B, SORBS2, XIRP2, ADRA1A, CACNA1C, DST, SYNPO, PARVA	1001	124	19662	2.6929	0.304966	0.0180253	0.823458
GOTERM_BP_DIRECT	GO:0035162~embryonic hemopoiesis	7	0.00435586	0.000587667	TAL1, HIF1A, TNRC6C, KMT2A, TGFBR2, SH2B3, MED1	957	21	18082	6.29815	0.891993	0.272352	1.08006
GOTERM_MF_DIRECT	GO:0003700~transcription factor activity, sequence-specific DNA binding	70	0.0435586	0.000652322	ZKSCAN6, TBX22, STAT5A, STAT5B, ZKSCAN1, REST, ZFP85, CITED1, ZGPAT, ZFP879, DMRTC1A, HSF4, SOX17, PITX2, EGR2, RCOR3, RCOR1, GMEB1, ESR1, ZFP629, MTA1, MECOM, DMRTB1, ZFP27, HIF1A, MTF1, GTF2IRD1, MGA, ST18, ZFP229, CREM, TFE3, ONECUT2, NR3C1, ZFP661, MYT1, TCF7L2, TAL1, ZFP668, TEAD4, POU2F1, ETV1, LHX6, TCF4, RUNX2, ETV4, ZBTB7B, ZFP54, IKZF2, TBX3, IKZF1, RFX5, CREB1, TEAD1, SMAD2, TEAD2, GSC…	922	883	17446	1.50004	0.501877	0.0485604	1.03424
GOTERM_CC_DIRECT	GO:0005874~microtubule	32	0.0199125	0.000655669	LZTS2, PRC1, TTLL5, KLC3, RADIL, DAXX, STAU2, MACF1, STARD9, CEP170, CAMSAP1, ODF2, CLASP1, CLASP2, DLG1, ARHGEF2, KIF3A, FMR1, TPX2, MTA1, KIF1B, RCC2, GSK3A, CLIP1, MAPRE2, MAP9, DST, DNM1, KIF20A, FEZ1, DNM2, KIF26B	1001	327	19662	1.92219	0.350513	0.0203413	0.976124
GOTERM_MF_DIRECT	GO:0000978~RNA polymerase II core promoter proximal region sequence-specific DNA binding	35	0.0217793	0.000711753	TFE3, ONECUT2, NR3C1, TCF7L2, ZGPAT, HNRNPK, TEAD4, ETV1, PATZ1, TCF4, RUNX2, ETV4, PITX2, ZBTB7B, AEBP2, SATB2, EGR2, ZFP58, TBX3, RFX5, CREB1, GMEB1, ZFP467, ESR1, TEAD1, SMAD2, NR4A3, FOXP4, NRF1, MTF1, EBF3, IRF4, RBPJ, TCF12, MED1	922	359	17446	1.84475	0.532531	0.0494313	1.12797
GOTERM_CC_DIRECT	GO:0055037~recycling endosome	16	0.00995625	0.000794938	MYO5A, STX6, GRIP1, RAN, VPS53, ATP11A, CFTR, ATP11C, TRF, SLC11A2, TMEM230, NISCH, RABEP1, ATP9A, TBC1D14, RAB17	1001	116	19662	2.70929	0.407425	0.0235047	1.18231
GOTERM_MF_DIRECT	GO:0098641~cadherin binding involved in cell-cell adhesion	29	0.0180457	0.000847096	RTN4, ALDOA, PDLIM5, HCFC1, RANGAP1, CAPZB, SRC, CTTN, HNRNPK, ARHGAP1, NUMB, RANBP1, LRRFIP1, ENO1, DLG1, EGFR, COBLL1, DAB2IP, RAN, PI4KA, TXNDC9, MARK2, EIF4G2, CAPG, UBAP2, GIGYF2, PAICS, PARVA, EPN2	922	279	17446	1.96679	0.595491	0.0549974	1.34111
GOTERM_BP_DIRECT	GO:0008104~protein localization	13	0.00808946	0.000862482	ALS2, MACF1, BBS7, ANK2, GRIN2C, GRIP1, NPM1, LRBA, MAPK8IP3, MLH3, HAP1, DLG1, KIF26B	957	79	18082	3.10922	0.96187	0.335251	1.58134
GOTERM_CC_DIRECT	GO:0002102~podosome	8	0.00497813	0.000947479	ARHGEF2, CTTN, HNRNPK, SVIL, ADAM8, PALLD, SRC, LCP1	1001	32	19662	4.91059	0.464062	0.0267546	1.40769
GOTERM_BP_DIRECT	GO:0009791~post-embryonic development	16	0.00995625	0.000977616	KMT2A, STK36, SMAD2, CYP1A2, DLK1, MECOM, MYT1, TCF7L2, LLGL2, DHCR7, SCN9A, MAPK8IP3, GNAS, GIGYF2, ERCC2, PLEKHA1	957	114	18082	2.65185	0.975352	0.337312	1.79063
GOTERM_CC_DIRECT	GO:0005777~peroxisome	17	0.0105785	0.00101131	MYO5A, ECI2, ACOX1, HACL1, VIM, PRDX5, PEX3, ECI3, FAR1, MFF, PEX11B, TMEM135, HSDL2, CCDC33, ACSL4, ACSL3, ACSL6	1001	131	19662	2.54901	0.486125	0.0273594	1.50185
GOTERM_BP_DIRECT	GO:0008360~regulation of cell shape	18	0.0112008	0.00107282	ALDOA, CSNK1A1, FMNL3, GAS2, LPAR1, TPM1, MKLN1, MYO10, CORO1A, TTBK2, CYFIP1, CDC42EP4, ARAP1, SEMA4A, CSF1R, DLG1, FN1, PARVA	957	139	18082	2.44676	0.982818	0.333948	1.96338
GOTERM_BP_DIRECT	GO:0017148~negative regulation of translation	12	0.00746719	0.00118452	EIF4ENIF1, PAIP2, RPL13A, TIA1, FMR1, RBM4, CNOT2, CNOT1, GIGYF2, GAPDH, CAPRIN1, YBX2	957	71	18082	3.19343	0.988748	0.334975	2.16569
GOTERM_BP_DIRECT	GO:0000122~negative regulation of transcription from RNA polymerase II promoter	59	0.0367137	0.00122198	TBX22, CNOT2, CNOT1, ZEB2, REST, DAXX, ZGPAT, TRPV4, HSF4, SOX17, KDM5A, KDM5C, DLG1, ATF7IP, DAB2IP, SATB2, RCOR3, RCOR1, SLA2, PKIG, ESR1, NRIP2, CD36, KDM2B, HIF1A, HIPK1, ST18, MED1, FGFR1, FRK, FGFR3, USP2, CHCHD3, HCFC1, TCF7L2, ARX, TAL1, HNRNPK, HEXIM2, TCF4, AEBP2, EHMT1, TBX3, IKZF1, ZFP57, JARID2, RFX5, NR4A3, EHMT2, FOXP4, PLK3, DUSP26, LRP8, PTCH1, RBPJ, HDAC7, KLF4, FAM220A, NCOR2	957	729	18082	1.52918	0.990238	0.320073	2.23346
GOTERM_CC_DIRECT	GO:0031410~cytoplasmic vesicle	52	0.0323578	0.00123645	CLTA, SEC31A, AU040320, GRIP1, PRDX5, ZNRF1, MFF, BDNF, DAB2, TMEM230, DYSF, IL15RA, TRPV4, ARHGEF2, HYAL3, SLA2, ANP32E, SPIRE1, SPAG8, KIF1B, SEMA4C, CLIP1, GNAS, ADAMTS1, EQTN, VOPP1, DST, FGFR1, NKD2, FGFR3, CLU, LRBA, BCL2L1, AZIN2, TRF, RAB7, SLC11A2, CAMKV, NUMB, PIK3R4, HAP1, DVL2, AMBRA1, CORO1A, RABEP1, CADPS2, MAPK8IP3, TNK2, CLCN7, ARAP1, ATP8A1, DNM2	1001	646	19662	1.58112	0.556957	0.0320391	1.83333
GOTERM_MF_DIRECT	GO:0044212~transcription regulatory region DNA binding	25	0.0155566	0.00136878	KMT2A, ARID4B, TFE3, REST, TCF7L2, CITED1, TAL1, ASH2L, RNF10, SOX17, RUNX2, IKZF2, EGR2, RCOR3, IKZF1, RCOR1, CREB1, KLF15, ZFP532, WNT11, CARM1, TCF12, SMARCA2, ARAP1, KLF4	922	233	17446	2.03025	0.768426	0.0824519	2.15861
GOTERM_CC_DIRECT	GO:0015629~actin cytoskeleton	22	0.0136899	0.001431	ALDOA, TRIOBP, CGNL1, PDLIM5, ONECUT2, ACACA, AKAP13, TOPBP1, PALLD, SLC16A3, CORO1A, ARHGAP6, MACF1, SVIL, ORC6, CDC42EP4, CIT, BMF, DST, LCP1, PARVA, SYNPO	1001	201	19662	2.14991	0.61026	0.0355925	2.11892
GOTERM_BP_DIRECT	GO:0030154~cell differentiation	61	0.0379582	0.00216069	NRP2, NPNT, RBM4, DLK1, CITED1, DAB2, SEMA3B, PIK3CD, MECOM, PPDPF, SLIT2, MARK2, EYA3, SPAG8, CHRDL1, HIF1A, TRAPPC9, SEMA4C, EDA, SEMA4A, FRK, PARD3, FGFR3, TDRD7, GRB2, STK11, ADCYAP1R1, MYT1, CFAP54, ARX, TAL1, RASGRP4, DHCR7, SH2B3, LHX6, ODF2, CAMK2B, TCF4, TDRD1, TEC, ZBTB7B, LGALS3, JARID2, CREB1, TGFBR2, NTNG1, DOCK7, AMBRA1, CAPRIN1, THSD7A, TBATA, SEMA6D, ECSCR, YIPF3, CPNE1, CYFIP1, T…	957	780	18082	1.47764	0.999722	0.467376	3.91704
GOTERM_MF_DIRECT	GO:0042802~identical protein binding	51	0.0317356	0.00216584	ALS2, FHIT, SNCAIP, TLR3, CBX3, CAD, TTN, PRMT1, NOD1, TARDBP, SLC8B1, KDM5C, VWA2, PHC2, MRI1, EGFR, DAB2IP, DDX39B, FMR1, ESR1, KCTD20, TOPBP1, PRPF3, SLIT2, LCP1, FGFR1, HACL1, KMT2A, GRB2, USP2, VIM, PFKFB1, HCFC1, BCL2L1, PLIN5, C1QTNF5, MYOM1, TCF4, GAPDH, FN1, DVL2, MICU1, MOCS2, CREB1, SUN2, NPR2, PLK4, CORO1A, TNK2, PAICS, DNM1	922	625	17446	1.54403	0.901296	0.120715	3.39542
GOTERM_CC_DIRECT	GO:0045202~synapse	42	0.0261352	0.00219702	GRIP1, TLN2, MYO7A, PDLIM5, PCDHA4, BCL2L1, LRRC4C, ZNRF1, ADORA1, MFF, TMEM230, GRIN2B, ANK2, HRH3, GRIN2C, RASGRP2, DTNB, MGLL, HAP1, SYNPO, DLG1, EGFR, ANKS1B, GLRB, MADD, FMR1, PSD3, PCDH15, NLGN3, ATP1A2, HOMER1, P2RX7, TMEM240, CADPS2, DOK7, SEMA4C, CHRNB3, CYFIP1, MAPK8IP1, APBB1, DNM1, DNM2	1001	505	19662	1.63362	0.764778	0.0521898	3.23589
GOTERM_CC_DIRECT	GO:0005884~actin filament	11	0.00684493	0.00219764	MYO5A, COBL, CTTN, CORO1A, PLS1, AKAP13, PALLD, CAPZB, SRC, LCP1, MARK2	1001	68	19662	3.17744	0.764875	0.0503876	3.2368
GOTERM_BP_DIRECT	GO:0007595~lactation	9	0.00560039	0.00257943	DDR1, HIF1A, STAT5A, CREB1, STAT5B, CAD, PRL, NCOR2, MED1	957	46	18082	3.69674	0.999943	0.502646	4.65917
GOTERM_BP_DIRECT	GO:1902459~positive regulation of stem cell population maintenance	4	0.00248906	0.00261194	KDM2B, TEAD4, TEAD1, TEAD3	957	6	18082	12.5963	0.99995	0.483208	4.71655
GOTERM_BP_DIRECT	GO:0042384~cilium assembly	16	0.00995625	0.00337244	CEP295, RPGR, KIF3A, BBS7, NEK1, TMEM216, STK36, ONECUT2, CFAP54, FOPNL, POC1B, TTBK2, RAB17, DZIP1L, SSX2IP, SNX10	957	129	18082	2.3435	0.999997	0.55038	6.0498
GOTERM_CC_DIRECT	GO:0043235~receptor complex	16	0.00995625	0.00339034	TM7SF2, EGFR, FGFR1, RET, CR2, IL23R, ADCYAP1R1, PTH1R, TGFBR2, ITGB4, PEX5L, ADRB3, DDR1, IMPG2, LRP8, COL10A1	1001	134	19662	2.34536	0.892969	0.0741624	4.95227
GOTERM_BP_DIRECT	GO:0000902~cell morphogenesis	12	0.00746719	0.00347573	EGFR, CSNK1A1, ARHGEF2, P2RX7, CAP2, SSH1, CLU, THOC2, ADAM8, CAPZB, MED1, IDUA	957	81	18082	2.79918	0.999998	0.539487	6.2295
GOTERM_MF_DIRECT	GO:0002039~p53 binding	11	0.00684493	0.00356683	EHMT1, PLK3, DUSP26, STK11, NPM1, USP10, RCHY1, BRD4, EHMT2, RNF20, DAXX	922	70	17446	2.97344	0.977988	0.181966	5.53387
GOTERM_BP_DIRECT	GO:0060271~cilium morphogenesis	19	0.0118231	0.00392331	CEP295, KIF3A, RPGR, BBS7, NEK1, TMEM216, STK36, ONECUT2, D1ERTD622E, CFAP54, FOPNL, POC1B, TTBK2, RAB17, DZIP1L, SSX2IP, SNX10, DNM2, PARVA	957	170	18082	2.11173	1	0.562565	7.00449
GOTERM_CC_DIRECT	GO:0045180~basal cortex	4	0.00248906	0.00393416	PHLDB1, CLASP1, CLASP2, MARK2	1001	7	19662	11.2242	0.925263	0.0828272	5.72499
GOTERM_BP_DIRECT	GO:0006898~receptor-mediated endocytosis	10	0.00622266	0.00404931	EGFR, SIGLECH, DAB2, CTTN, CD36, CD300A, TGFBR2, NLGN3, DNM1, DNM2	957	60	18082	3.14908	1	0.554482	7.22156
GOTERM_MF_DIRECT	GO:0051015~actin filament binding	16	0.00995625	0.0041349	EGFR, TRIOBP, ADSSL1, TLN2, MYO7A, TTN, CAPZB, TPM1, MYO10, CORO1A, SVIL, PLS1, TRPV4, CYFIP1, LCP1, SPTB	922	132	17446	2.29356	0.988028	0.198493	6.38827
GOTERM_CC_DIRECT	GO:0005814~centriole	14	0.00871172	0.00418246	AGBL2, CEP295, KIF3A, RAN, CCDC67, PLK4, POC1B, TTBK2, CEP170, STARD9, DZIP1L, CAPG, ODF2, HAP1	1001	111	19662	2.47741	0.936571	0.08512	6.07586
GOTERM_CC_DIRECT	GO:0032993~protein-DNA complex	7	0.00435586	0.00420389	HNRNPK, IKZF1, TEAD4, KDM5A, RBPJ, TCF7L2, MED1	1001	31	19662	4.43537	0.937462	0.0829787	6.10607
GOTERM_CC_DIRECT	GO:0030054~cell junction	54	0.0336024	0.00423279	PRX, CGNL1, PARD3, GRIP1, TLN2, PDLIM5, ITGB4, BCL2L1, LRRC4C, ZNRF1, CXADR, MFF, TMEM230, CTTN, HNRNPK, ANK2, GRIN2B, SORBS2, GRIN2C, FAT1, RASGRP2, TRPV4, SSX2IP, IMPDH1, HAP1, DLG1, SYNPO, ANKS1B, ARHGEF2, GLRB, FMR1, PTPRR, PSD3, CRB3, NLGN3, HOMER1, PALLD, GJB1, IGSF5, TMEM240, CADPS2, XIRP2, SVIL, DOK7, PECAM1, SEMA4C, CHRNB3, CYFIP1, TNK2, DST, LCP1, DNM2, SNTA1, PARVA	1001	718	19662	1.47728	0.938645	0.0811003	6.14682
GOTERM_MF_DIRECT	GO:0005078~MAP-kinase scaffold activity	4	0.00248906	0.0043727	SPAG9, AKAP13, MAPK8IP3, MAPK8IP1	922	7	17446	10.8125	0.990724	0.199782	6.74377
GOTERM_MF_DIRECT	GO:0008134~transcription factor binding	31	0.0192902	0.00447645	NAAA, STK36, BCL2L1, REST, NR3C1, DAXX, TCF7L2, HNRNPK, MDFIC, HNRNPF, NPM1, SOX17, RUNX2, ARHGEF10L, PITX2, RCOR3, RCOR1, CREB1, MED12, ESR1, SMAD2, HIF1A, APBB2, RBPJ, APBB1, TCF12, ARAP1, KLF4, NCOR2, HDAC7, MED1	922	342	17446	1.71514	0.991701	0.195713	6.89847
GOTERM_CC_DIRECT	GO:1904115~axon cytoplasm	7	0.00435586	0.00495536	KIF1B, HIF1A, KIF3A, RANGAP1, RANBP1, DST, HAP1	1001	32	19662	4.29677	0.961945	0.0916625	7.16023
GOTERM_MF_DIRECT	GO:0048365~Rac GTPase binding	8	0.00497813	0.00520462	DVL2, ALS2, ARHGEF2, RCC2, ABI2, CYFIP1, DOCK7, RAB7	922	41	17446	3.69208	0.996201	0.215184	7.97753
GOTERM_BP_DIRECT	GO:0040018~positive regulation of multicellular organism growth	8	0.00497813	0.005249	IKZF1, STAT5A, CREB1, STAT5B, SPTBN4, PLS1, CELF1, DLG1	957	41	18082	3.68672	1	0.630739	9.26449
GOTERM_MF_DIRECT	GO:0008270~zinc ion binding	77	0.0479145	0.00539413	APOBEC1, PDLIM5, S100A9, RBM4, PHF23, CAD, ZNRF1, FBXL19, BRPF1, TRIM2, GRIN2B, TRIM44, TRIM45, ADAM8, KDM5A, RNF32, PHC1, KDM5C, USP13, PHC2, ZC3HC1, LIMK1, CIZ1, LDB3, ESR1, SF1, MTA1, VPS8, KDM2B, XIRP2, MLLT10, MORC2B, LIMCH1, CLIP1, ADAMTS1, RNF26, ST18, RNF20, MATR3, KMT2A, FBXO40, ENPP2, LANCL1, TRIM13, NR3C1, MYT1, DIDO1, SLC11A2, RNFT2, DTNB, LHX6, RNF10, RCHY1, SGIP1, AGBL2, EHMT1, ZMYM…	922	1075	17446	1.35534	0.996901	0.213913	8.25643
GOTERM_CC_DIRECT	GO:0030864~cortical actin cytoskeleton	8	0.00497813	0.00558281	CORO1A, CAP2, AKAP13, TRPV4, RAPGEF3, SCNN1A, MYADM, LLGL2	1001	43	19662	3.65439	0.974872	0.0999013	8.03192
GOTERM_BP_DIRECT	GO:0006909~phagocytosis	9	0.00560039	0.00563076	TUSC2, CSNK1A1, SLC11A1, CORO1A, MYO7A, PECAM1, VAV1, ELMO2, DNM2	957	52	18082	3.2702	1	0.638688	9.90562
GOTERM_MF_DIRECT	GO:0004672~protein kinase activity	43	0.0267574	0.00569245	FGFR1, FRK, FGFR3, STK11, NEK1, STK36, CAD, TTN, EPHB4, SRC, CAMKV, SNRK, TTBK2, CAMK2B, BRD4, PIK3R4, CSF1R, TEC, ERCC2, EGFR, CSNK1A1, IRAK1, RET, SGK1, LTK, LIMK1, TGFBR2, NPR2, CDKL3, CDK4, TBCK, MARK2, DDR1, PLK4, MAP4K5, PLK3, HIPK1, GSK3A, RASSF2, TNK2, CIT, NEK6, NEK7	922	531	17446	1.53228	0.99775	0.216415	8.69386
GOTERM_CC_DIRECT	GO:0043025~neuronal cell body	42	0.0261352	0.00576531	MYO5A, ALS2, RTN4, COBL, PARD3, GRIP1, HCFC1, EIF5A, CAD, LPAR1, CAPZB, ADORA1, STAU2, STAU1, GLRX2, BDNF, SORBS2, RAPGEF3, PUM2, DPP6, ACSL4, ARHGEF2, RET, DAB2IP, KIF3A, NCF1, RBFOX3, OMP, SPTBN4, NLGN3, HOMER1, PALLD, MYO10, P2RX7, PLK3, RAB17, GNAS, LRP8, TNK2, CACNA1C, CIT, APBB1	1001	534	19662	1.5449	0.977731	0.100289	8.28403
GOTERM_CC_DIRECT	GO:0031965~nuclear membrane	22	0.0136899	0.00577293	EGFR, NLRP6, ZC3HC1, DTX2, SUN2, MRGPRF, RANGAP1, BCL2L1, WTAP, CDK4, STAU2, PNPLA7, SLC16A3, RNF6, CEPT1, CEP170, ADRA1A, IL15RA, PLCD4, PUM2, GAPDH, C87436	1001	226	19662	1.91209	0.977843	0.0978387	8.29454
GOTERM_MF_DIRECT	GO:0003730~mRNA 3'-UTR binding	9	0.00560039	0.00627352	HNRNPK, TARDBP, FMR1, RBM4, PUM2, CRYZ, RNF20, HNRNPR, YBX2	922	53	17446	3.21315	0.998795	0.227798	9.54029
GOTERM_BP_DIRECT	GO:0030030~cell projection organization	17	0.0105785	0.00627506	RPGR, KIF3A, BBS7, NEK1, TMEM216, MYO7A, STK36, D1ERTD622E, CAPZB, CCDC67, CFAP54, FOPNL, POC1B, SSX2IP, SNX10, HAP1, PARVA	957	151	18082	2.12719	1	0.661518	10.9779
GOTERM_MF_DIRECT	GO:0035035~histone acetyltransferase binding	7	0.00435586	0.00692982	HIF1A, MTF1, CREB1, KANSL1L, NR4A3, APBB2, APBB1	922	33	17446	4.01374	0.999405	0.240479	10.4875
GOTERM_BP_DIRECT	GO:0050731~positive regulation of peptidyl-tyrosine phosphorylation	13	0.00808946	0.00697144	OSM, ARHGEF2, NOD2, CD36, FGFR3, CD44, STK11, ENPP2, LRP8, MLST8, TNK2, SRC, TEC	957	101	18082	2.43196	1	0.683863	12.1234
GOTERM_CC_DIRECT	GO:0042383~sarcolemma	14	0.00871172	0.00700674	FXYD1, ATP1A2, DYSF, CD36, ANK2, PEMT, COL6A2, CACNA1H, GNAS, SGCE, CACNA1C, SLC8B1, DST, SNTA1	1001	118	19662	2.33045	0.990213	0.114634	9.98189
GOTERM_CC_DIRECT	GO:0030426~growth cone	17	0.0105785	0.00715698	ALS2, SSH1, CLU, FMR1, CYTH2, PALLD, CXADR, HNRNPR, PCDHGB1, CTTN, MAPK8IP3, TRPV4, RAPGEF3, TNK2, APBB1, HAP1, DNM2	1001	159	19662	2.10013	0.99114	0.11413	10.1854
GOTERM_CC_DIRECT	GO:0005768~endosome	42	0.0261352	0.00780384	VPS29, MAMDC4, SEC31A, GRB2, ADCYAP1R1, TLR3, VPS53, LPAR1, ZNRF1, TRF, RAB7, SLC11A2, SLC29A3, TMEM230, NISCH, DYSF, PACSIN3, USP10, PIK3R4, RNF32, EGFR, RET, SLA2, GOLIM4, SUN2, ATP11A, CFTR, SCOC, ATP1A2, CLEC16A, RABEP1, TOM1L1, ATP9A, RAB17, TOM1, GNAS, TNK2, VOPP1, SNX13, GGA3, SNX10, DNM2	1001	544	19662	1.51651	0.99423	0.120918	11.0566
GOTERM_MF_DIRECT	GO:0015459~potassium channel regulator activity	7	0.00435586	0.00804712	KCNMB4, SGK1, ANK2, ARPP19, DPP6, DLG1, KCNMB2	922	34	17446	3.89569	0.999821	0.265218	12.0786
GOTERM_MF_DIRECT	GO:0030165~PDZ domain binding	14	0.00871172	0.00818447	ACOX1, MPP3, CFTR, LPAR1, CXADR, LLGL2, IGSF5, GRIN2C, CIT, PDZK1, KIRREL3, PLEKHA1, SNTA1, DLG1	922	116	17446	2.28368	0.999846	0.261146	12.2723
GOTERM_BP_DIRECT	GO:0001525~angiogenesis	23	0.0143121	0.00825726	RTN4, NRP2, FGFR1, FMNL3, DAB2IP, CCDC80, ECM1, EPHB4, THSD7A, TAL1, HIF1A, ECSCR, PECAM1, PLCD3, SHC1, RAPGEF3, SOX17, ADAM8, RBPJ, SEMA4A, PARVA, MED1, FN1	957	239	18082	1.8183	1	0.729637	14.2018
GOTERM_MF_DIRECT	GO:0032403~protein complex binding	31	0.0192902	0.00842451	RTN4, FGFR1, STK11, MYO7A, ABI2, REST, NR3C1, ATP6V1B1, SKAP1, SRC, SHC1, DAB2IP, KIF3A, RAN, FBN1, DDX39B, ESR1, PCDH15, CDK4, HIF1A, CAPG, PDCL, CYFIP1, PTCH1, RBPJ, APBB1, PDZK1, DNM1, NCOR2, DNM2, MED1	922	358	17446	1.63849	0.999881	0.260058	12.61
GOTERM_BP_DIRECT	GO:0001779~natural killer cell differentiation	5	0.00311133	0.00847901	TUSC2, IKZF1, STAT5A, STAT5B, IL11RA1	957	16	18082	5.90452	1	0.724601	14.5555
GOTERM_BP_DIRECT	GO:0050995~negative regulation of lipid catabolic process	5	0.00311133	0.00847901	PLIN5, APOC1, BSCL2, ACACB, ADORA1	957	16	18082	5.90452	1	0.724601	14.5555
GOTERM_BP_DIRECT	GO:0031529~ruffle organization	5	0.00311133	0.00847901	CYFIP1, PALLD, TPM1, CSF1R, PLEKHA1	957	16	18082	5.90452	1	0.724601	14.5555
GOTERM_BP_DIRECT	GO:0043410~positive regulation of MAPK cascade	13	0.00808946	0.00875929	PTPRC, FGFR1, DAB2IP, FGFR3, PSAP, LPAR1, OSM, ADRB3, SPAG9, P2RX7, NOD2, CD36, ADRA1A	957	104	18082	2.36181	1	0.72227	15.0006
GOTERM_BP_DIRECT	GO:0006468~protein phosphorylation	45	0.028002	0.00914503	FGFR1, FRK, FGFR3, STK11, NEK1, STK36, PHKA1, EPHB4, SRC, CAMKV, SNRK, CAMK2B, BRD4, PIK3R4, CSF1R, TEC, EGFR, CSNK1A1, IRAK1, RET, SGK1, LTK, LIMK1, CREB1, TGFBR2, SMAD2, NPR2, CDKL3, CDK4, TBCK, MARK2, DDR1, PLK4, MAP4K5, P2RX7, PLK3, HIPK1, GSK3A, PRKAR1B, RSRC1, WNT11, TNK2, CIT, NEK6, NEK7	957	576	18082	1.47613	1	0.724243	15.6095
GOTERM_BP_DIRECT	GO:0051592~response to calcium ion	10	0.00622266	0.00928472	EGFR, P2RX7, APOBEC1, SLC25A13, S100A16, SEC31A, PCDH15, RANBP1, HOMER1, TTN	957	68	18082	2.7786	1	0.716712	15.829
GOTERM_BP_DIRECT	GO:0009617~response to bacterium	7	0.00435586	0.00935602	SLC11A1, TLR11, NLRP6, P2RX7, NCF1, FUCA2, MECOM	957	35	18082	3.77889	1	0.706886	15.9409
GOTERM_CC_DIRECT	GO:0005802~trans-Golgi network	17	0.0105785	0.00952856	STX6, LRBA, VPS53, POSTN, SCOC, AZIN2, TMEM230, PACSIN3, ATP9A, VAMP4, CLASP2, AP4B1, SMPD4, ARAP1, GGA3, ATP8A1, DNM2	1001	164	19662	2.0361	0.998163	0.142432	13.341
GOTERM_CC_DIRECT	GO:0045211~postsynaptic membrane	21	0.0130676	0.00964209	ANKS1B, GLRB, GRIP1, PDLIM5, FMR1, PSD3, LRRC4C, HOMER1, ADORA1, GRIN2B, CADPS2, ANK2, GRIN2C, SEMA4C, CHRNB3, AKAP1, APBB1, DNM2, SNTA1, DLG1, SYNPO	1001	222	19662	1.85806	0.998297	0.140833	13.4894
GOTERM_CC_DIRECT	GO:0010494~cytoplasmic stress granule	7	0.00435586	0.0102521	TIA1, FMR1, RBM4, PUM2, CAPRIN1, STAU2, STAU1	1001	37	19662	3.71612	0.998865	0.145886	14.2829
GOTERM_CC_DIRECT	GO:0005905~clathrin-coated pit	9	0.00560039	0.0106579	DAB2, CTTN, CLTA, TNK2, AP4B1, FCHO1, TRF, DNM2, SGIP1	1001	60	19662	2.94635	0.999133	0.14806	14.8071
GOTERM_BP_DIRECT	GO:0035264~multicellular organism growth	14	0.00871172	0.0108913	NEK1, PCDH15, TCF7L2, LLGL2, RPL29, ATRX, XPA, TMED2, DHCR7, GNAS, GIGYF2, ERCC1, ERCC2, PLEKHA1	957	120	18082	2.20435	1	0.74893	18.3151
GOTERM_BP_DIRECT	GO:0098609~cell-cell adhesion	19	0.0118231	0.0114726	ALDOA, COBLL1, PDLIM5, PI4KA, HCFC1, TXNDC9, CAPZB, ELMO2, MARK2, EIF4G2, ARHGAP1, CAPG, LRRFIP1, UBAP2, GIGYF2, PAICS, ENO1, EPN2, PARVA	957	189	18082	1.89944	1	0.755671	19.1975
GOTERM_MF_DIRECT	GO:0004713~protein tyrosine kinase activity	14	0.00871172	0.0114884	EGFR, FRK, FGFR1, RET, FGFR3, LTK, NEK1, TTN, EPHB4, SRC, DDR1, TNK2, CSF1R, TEC	922	121	17446	2.18931	0.999996	0.328395	16.8143
GOTERM_BP_DIRECT	GO:0007507~heart development	24	0.0149344	0.0115325	NRP2, DVL2, KIF3A, BBS7, FBN1, TGFBR2, MED12, AKAP13, TEAD1, CAD, SMAD2, CXADR, TTN, FOXP4, EIF4G2, XIRP2, PBRM1, STRA6, VCAN, SHC1, RBPJ, CACNA1C, MED1, PITX2	957	261	18082	1.73742	1	0.746494	19.2878
GOTERM_BP_DIRECT	GO:0016337~single organismal cell-cell adhesion	13	0.00808946	0.0116767	EGFR, PARD3, CCDC80, CXADR, SRC, SLIT2, ITGAM, IGSF5, FAT1, EFR3A, SHC1, ADAM8, DLG1	957	108	18082	2.27433	1	0.740115	19.505
GOTERM_CC_DIRECT	GO:0000785~chromatin	14	0.00871172	0.0118896	RAN, CREB1, FAM111A, PPP1R10, CBX3, REST, CDK4, PLK3, JMJD1C, NCOR2, KLF4, STAG1, MED1, FANCC	1001	126	19662	2.18248	0.999618	0.160454	16.3796
GOTERM_BP_DIRECT	GO:0000910~cytokinesis	7	0.00435586	0.0122565	LZTS2, PRC1, KLHL13, BCL2L1, CIT, MAP9, KIF20A	957	37	18082	3.57463	1	0.746713	20.373
GOTERM_CC_DIRECT	GO:0044295~axonal growth cone	6	0.0037336	0.0124733	COBL, PARD3, LIMK1, PTCH1, MAPK8IP1, PALLD	1001	28	19662	4.20908	0.999741	0.164349	17.1153
GOTERM_BP_DIRECT	GO:0014003~oligodendrocyte development	6	0.0037336	0.0124924	FGFR3, MED12, LPAR1, EIF2B3, TCF7L2, EIF2B5	957	27	18082	4.19877	1	0.743297	20.7235
GOTERM_BP_DIRECT	GO:0007163~establishment or maintenance of cell polarity	6	0.0037336	0.0124924	PARD3, CAP2, MACF1, FAT1, CLASP2, PARVA	957	27	18082	4.19877	1	0.743297	20.7235
GOTERM_BP_DIRECT	GO:0019915~lipid storage	6	0.0037336	0.0124924	PLIN5, CD36, PLIN2, STAT5A, STAT5B, BSCL2	957	27	18082	4.19877	1	0.743297	20.7235
GOTERM_BP_DIRECT	GO:0001657~ureteric bud development	8	0.00497813	0.0124994	FGFR1, RET, BDNF, NPNT, SMAD2, VCAN, SLIT2, DLG1	957	48	18082	3.14908	1	0.733614	20.734
GOTERM_BP_DIRECT	GO:0051092~positive regulation of NF-kappaB transcription factor activity	13	0.00808946	0.0125109	IRAK1, ARHGEF2, CLU, TRIM13, TLR3, NOD2, NOD1, TRAPPC9, NPM1, LRRFIP1, CARM1, ADAM8, EDA	957	109	18082	2.25347	1	0.724247	20.751
GOTERM_CC_DIRECT	GO:0000790~nuclear chromatin	21	0.0130676	0.0126811	SATB2, CREB1, NASP, SCML2, ESR1, PPP1R10, POLR3GL, SMAD2, EHMT2, TCF7L2, BUD31, RAD50, TAL1, HNRNPK, BRD4, TCF4, RUNX2, TCF12, SMARCA2, NCOR2, KLF4	1001	228	19662	1.80916	0.999775	0.163618	17.3757
GOTERM_MF_DIRECT	GO:0005524~ATP binding	100	0.0622266	0.0129398	ADCY4, TARS2, STK36, TTN, STARD9, EGFR, NMNAT3, RET, PIK3CD, DDX39B, CDKL3, MARK2, MAP4K5, ATP9A, SMARCA2, NEK6, EP400, NEK7, KIF26B, FGFR1, FGFR3, STK11, NEK1, PFKFB1, ATP6V1B1, EPHB4, SRC, CAMKV, TTBK2, NPM1, RUNX2, CSF1R, TEC, KIF3A, AK1, TGFBR2, ACACA, ATP11A, ACACB, ATP11C, ABCG3, P2RX7, MYO10, PLK4, PLK3, PSMC3, TNK2, GUK1, CLCN7, FIGNL1, MYO7A, TTLL5, CAD, MLH3, NOD2, NOD1, TRPV4, IP6K2, N…	922	1507	17446	1.2556	0.999999	0.352531	18.7391
GOTERM_BP_DIRECT	GO:0048541~Peyer's patch development	4	0.00248906	0.0133636	IKZF1, STAT5A, STAT5B, CACNB4	957	10	18082	7.55778	1	0.738263	22.0057
GOTERM_BP_DIRECT	GO:0050890~cognition	7	0.00435586	0.0139208	DGCR2, KMT2A, HRH3, CYFIP1, GNAS, STRA6, ADORA1	957	38	18082	3.48056	1	0.743567	22.8154
GOTERM_BP_DIRECT	GO:0001755~neural crest cell migration	8	0.00497813	0.0139364	NRP2, RET, HIF1A, SEMA6D, SEMA4C, SEMA3B, ZEB2, SEMA4A	957	49	18082	3.08481	1	0.735087	22.8378
GOTERM_CC_DIRECT	GO:0030424~axon	30	0.018668	0.0140013	GC, NRP2, ALS2, MYO5A, COBL, VIM, HCFC1, MAF1, AZIN2, STAU2, BDNF, MGLL, KIRREL3, SYNPO, RET, DAB2IP, CREB1, OMP, SPTBN4, FMR1, DOCK7, HOMER1, PALLD, EIF4G2, CORO1A, RNF6, LRP8, TNK2, MAPK8IP1, FEZ1	1001	370	19662	1.59262	0.999907	0.175758	19.0127
GOTERM_CC_DIRECT	GO:0005813~centrosome	34	0.021157	0.0144284	ALS2, LZTS2, BBS7, USP2, NEK1, TTLL5, BCL2L1, MAF1, CCDC64, CEP170, NPM1, ODF2, RANBP1, CLASP1, PPP1R42, HAP1, CSNK1A1, CEP295, KIF3A, RPGR, MED12, TOPBP1, DCTN6, TXNDC9, DIS3L, EYA3, PLK4, FOPNL, PLK3, POC1B, CLIP1, SNX10, FEZ1, DNM2	1001	435	19662	1.53526	0.99993	0.177301	19.5359
GOTERM_BP_DIRECT	GO:0010976~positive regulation of neuron projection development	15	0.00933399	0.0145376	FGFR1, RET, DAB2IP, LTK, UBE2V2, MARK2, HNRNPK, CAMK2B, ADAMTS1, RANBP1, NCKIPSD, APBB1, ACSL6, HAP1, FEZ1	957	138	18082	2.05375	1	0.741348	23.7023
GOTERM_BP_DIRECT	GO:0030900~forebrain development	11	0.00684493	0.015151	ARX, ATRX, KDM2B, FGFR3, TTBK2, IKZF1, NUMB, MAPK8IP3, MECOM, SRC, NCOR2	957	86	18082	2.41673	1	0.747465	24.5749
GOTERM_BP_DIRECT	GO:0045185~maintenance of protein location	3	0.0018668	0.0155995	LGALS3, PEX5L, LGALS9	957	4	18082	14.1708	1	0.749502	25.2069
GOTERM_BP_DIRECT	GO:0001845~phagolysosome assembly	3	0.0018668	0.0155995	CORO1A, P2RX7, MYO7A	957	4	18082	14.1708	1	0.749502	25.2069
GOTERM_BP_DIRECT	GO:0001701~in utero embryonic development	26	0.0161789	0.0160615	ALS2, FGFR1, BCL2L1, TTN, TPM1, DAB2, PRMT1, GRIN2B, TMED2, TEAD4, TERF2, PITX2, ERCC2, ENO1, KIF3A, TBX3, TGFBR2, PTPRR, SMAD2, MECOM, SLIT2, MAPK8IP3, PTCH1, NCOR2, EPN2, MED1	957	299	18082	1.643	1	0.75173	25.8527
GOTERM_BP_DIRECT	GO:0060999~positive regulation of dendritic spine development	6	0.0037336	0.0168492	EIF4G2, HNRNPK, FMR1, NLGN3, NR3C1, LPAR1	957	29	18082	3.9092	1	0.760608	26.9416
GOTERM_BP_DIRECT	GO:0030182~neuron differentiation	14	0.00871172	0.0169206	TAL1, RET, CHRDL1, TRAPPC9, HIPK1, WNT11, SHC1, WNT9A, TLX3, CEND1, ACSL4, RBPJ, RUNX2, PITX2	957	127	18082	2.08285	1	0.754524	27.0396
GOTERM_BP_DIRECT	GO:0035690~cellular response to drug	10	0.00622266	0.0170879	EGFR, ADSSL1, QDPR, TLR3, CAD, RANBP1, REST, EHMT2, FANCB, EIF2B5	957	75	18082	2.51926	1	0.750522	27.2687
GOTERM_CC_DIRECT	GO:0005778~peroxisomal membrane	8	0.00497813	0.0172548	FAR1, ACOX1, PEX11B, PEX3, ACSL4, PEX5L, ACSL3, ACSL6	1001	53	19662	2.96488	0.999989	0.204715	22.9187
GOTERM_CC_DIRECT	GO:0016607~nuclear speck	19	0.0118231	0.0172549	EIF4ENIF1, CSNK1A1, RBM4, DDX39B, PRPF3, MECOM, WTAP, HIF1A, HIPK1, RSRC1, TARDBP, NPM1, THOC6, SRRM1, RCHY1, THOC2, APBB1, NEK6, EP400	1001	205	19662	1.82051	0.999989	0.201137	22.9189
GOTERM_BP_DIRECT	GO:0048812~neuron projection morphogenesis	9	0.00560039	0.0174565	EGFR, ALS2, CTTN, SGK1, DAB2IP, CLU, SLIT2, DNM2, KIRREL3	957	63	18082	2.69921	1	0.750686	27.7708
GOTERM_BP_DIRECT	GO:0008542~visual learning	9	0.00560039	0.0174565	SGK1, HIF1A, B4GALT2, KMT2A, CREB1, NLGN3, ATP1A2, CACNA1C, APBB1	957	63	18082	2.69921	1	0.750686	27.7708
GOTERM_BP_DIRECT	GO:0051639~actin filament network formation	4	0.00248906	0.0176626	COBLL1, COBL, PLS1, LCP1	957	11	18082	6.87071	1	0.747642	28.0503
GOTERM_BP_DIRECT	GO:0016192~vesicle-mediated transport	20	0.0124453	0.0181864	STX6, MYO5A, RAB2B, CLTA, SEC31A, RINT1, SPIRE1, ERGIC3, STXBP5L, SPAG9, RABEP1, TMED2, SCFD2, VAMP4, MAPK8IP3, TBC1D4, MAPK8IP1, AP4B1, STX11, GGA3	957	213	18082	1.77413	1	0.750862	28.7556
GOTERM_CC_DIRECT	GO:0070062~extracellular exosome	160	0.0995625	0.0182194	FHIT, AU040320, S100A9, EIF5A, TTN, DAB2, DYSF, CD44, PACSIN3, CFH, PLS1, GNG2, RAPGEF3, SLC4A4, SMIM1, HIST1H2BQ, IDUA, PLD3, AMY1, DAB2IP, RAN, CHTF8, QDPR, MRGPRF, TAF6L, TCN2, CFAP70, SPAG9, CD37, RAB17, FAM171A1, GLG1, ALDOA, GC, FCER2A, STK11, GRB2, CLU, PTH1R, APOC1, CHCHD3, TMEM63A, ITGB4, UBE2V2, ATP6V1B1, EPHB4, CAPZB, TRF, SRC, ITGAM, RAB7, PLAA, LGALS3BP, HNRNPK, CHIL1, GMPPA, EFR3A, …	1001	2674	19662	1.17531	0.999994	0.207586	24.0425
GOTERM_CC_DIRECT	GO:0005811~lipid particle	9	0.00560039	0.018356	IRAK1, PLIN5, TMEM135, PLIN2, AKAP1, ACSL4, GAPDH, ACSL3, RAB7	1001	66	19662	2.6785	0.999995	0.205473	24.2004
GOTERM_CC_DIRECT	GO:0032587~ruffle membrane	10	0.00622266	0.0186278	ARHGEF2, MACF1, RASGRP2, TRPV4, CLASP2, TPM1, SRC, LCP1, DNM2, PLEKHA1	1001	79	19662	2.48637	0.999996	0.20477	24.5137
GOTERM_BP_DIRECT	GO:0007275~multicellular organism development	71	0.0441809	0.0186973	NRP2, RBPMS2, NPNT, STK36, CNOT2, CNOT1, RADIL, WTAP, CITED1, DAB2, ETL4, SEMA3B, KDM5A, PHC1, PHC2, PITX2, EGFR, DAB2IP, FMNL3, SATB2, PPDPF, SLIT2, MARK2, EYA3, CHRDL1, GTF2IRD1, SEMA4C, THOC6, WNT11, WNT9A, EDA, SEMA4A, MED1, KIF26B, TDRD7, ADCYAP1R1, MYT1, EPHB4, MFRP, ARX, TAL1, NUMB, CASZ1, LHX6, ODF2, TLX3, TCF4, GAPDH, TDRD1, ZBTB7B, DVL2, TBX3, IKZF1, ZMYM4, ZMYM3, ZFP57, JARID2, ZMYM5, …	957	1029	18082	1.3037	1	0.753684	29.4374
GOTERM_BP_DIRECT	GO:0010977~negative regulation of neuron projection development	9	0.00560039	0.0190567	H2-K1, RTN4, DAB2, VIM, IL15RA, TRPV4, LPAR1, THOC2, RBPJ	957	64	18082	2.65703	1	0.753617	29.9133
GOTERM_MF_DIRECT	GO:0001105~RNA polymerase II transcription coactivator activity	7	0.00435586	0.0197102	PSIP1, MED12, CARM1, SMARCA2, CITED1, WWOX, PITX2	922	41	17446	3.23057	1	0.474951	27.1788
GOTERM_CC_DIRECT	GO:0001673~male germ cell nucleus	5	0.00311133	0.0199102	RAN, STAG3, TOPBP1, MLH3, TERF2	1001	21	19662	4.67675	0.999998	0.213846	25.9756
GOTERM_CC_DIRECT	GO:0030027~lamellipodium	16	0.00995625	0.0202513	ALS2, ABI2, PALLD, CAPZB, CTTN, MYO10, CORO1A, DYSF, SORBS2, FAT1, TRPV4, CYFIP1, RAPGEF3, APBB1, DNM2, PARVA	1001	164	19662	1.91633	0.999999	0.213683	26.3599
GOTERM_BP_DIRECT	GO:0018108~peptidyl-tyrosine phosphorylation	9	0.00560039	0.020759	EGFR, FGFR1, DDR1, FGFR3, STAT5A, ABI2, SRC, CSF1R, TEC	957	65	18082	2.61616	1	0.776536	32.1264
GOTERM_CC_DIRECT	GO:0030139~endocytic vesicle	8	0.00497813	0.020827	EGFR, DAB2IP, DYSF, RABEP1, RAB17, NLGN3, LPAR1, TRF	1001	55	19662	2.85707	0.999999	0.215699	27.0044
GOTERM_BP_DIRECT	GO:0010628~positive regulation of gene expression	32	0.0199125	0.0208478	VIM, HCFC1, TLR3, MYT1, CITED1, SRC, ARX, SLC11A1, TMED2, CD44, ANK2, TRPV4, SOX17, RUNX2, ETV4, TERF2, FN1, ZBTB7B, RET, IKZF1, PIK3CD, SMAD2, LGALS9, P2RX7, TMEM135, HIF1A, WNT11, RBPJ, EDA, TCF12, KLF4, MED1	957	399	18082	1.51535	1	0.771704	32.2399
GOTERM_BP_DIRECT	GO:0031047~gene silencing by RNA	8	0.00497813	0.020871	TNRC6C, FMR1, RBM4, CNOT2, CNOT1, EXD1, CNOT7, TDRD1	957	53	18082	2.85199	1	0.765871	32.2696
GOTERM_BP_DIRECT	GO:0008285~negative regulation of cell proliferation	31	0.0192902	0.021524	DLEC1, LZTS2, FGFR3, KMT2A, STK11, PTH1R, REST, PTTG1, CNOT7, ADORA1, TMEM127, NPM1, PEMT, PBRM1, ASPH, CSF1R, DAB2IP, JARID2, TGFBR2, SMAD2, AMBRA1, SLIT2, OSM, DDR1, CD37, DNAJB2, PTCH1, WNT9A, RBPJ, SMARCA2, KLF4	957	384	18082	1.52533	1	0.77032	33.0993
GOTERM_CC_DIRECT	GO:0016023~cytoplasmic, membrane-bounded vesicle	15	0.00933399	0.0219332	FGFR1, ARHGEF2, CLTA, NKD2, GRIP1, SLA2, ANP32E, LRBA, TRF, BDNF, CADPS2, NUMB, MAPK8IP3, DST, HAP1	1001	151	19662	1.95123	1	0.222442	28.228
GOTERM_MF_DIRECT	GO:0030507~spectrin binding	6	0.0037336	0.0219792	MYO10, KIF3A, ANK2, MYO7A, CAMSAP1, SPTBN4	922	31	17446	3.6623	1	0.502473	29.8182
GOTERM_MF_DIRECT	GO:0017112~Rab guanyl-nucleotide exchange factor activity	6	0.0037336	0.0219792	ALS2, SBF1, MADD, SBF2, DENND2C, ST5	922	31	17446	3.6623	1	0.502473	29.8182
GOTERM_MF_DIRECT	GO:0051010~microtubule plus-end binding	4	0.00248906	0.0225493	CLIP1, CLASP1, CLASP2, DST	922	12	17446	6.3073	1	0.501401	30.4672
GOTERM_MF_DIRECT	GO:0008135~translation factor activity, RNA binding	4	0.00248906	0.0225493	EIF4G2, MTIF2, MTIF3, EIF2B3	922	12	17446	6.3073	1	0.501401	30.4672
GOTERM_BP_DIRECT	GO:0045648~positive regulation of erythrocyte differentiation	5	0.00311133	0.0226161	TAL1, PRMT1, HIF1A, STAT5B, MED1	957	21	18082	4.49868	1	0.781164	34.4653
GOTERM_BP_DIRECT	GO:0045722~positive regulation of gluconeogenesis	4	0.00248906	0.0226399	HIF1A, STK11, ARPP19, TCF7L2	957	12	18082	6.29815	1	0.775712	34.4947
GOTERM_BP_DIRECT	GO:0010458~exit from mitosis	4	0.00248906	0.0226399	CLASP1, CLASP2, UBE2C, PPP2R2D	957	12	18082	6.29815	1	0.775712	34.4947
GOTERM_MF_DIRECT	GO:0004714~transmembrane receptor protein tyrosine kinase activity	8	0.00497813	0.0227506	EGFR, FGFR1, DDR1, RET, LTK, FGFR3, EPHB4, CSF1R	922	54	17446	2.80325	1	0.494765	30.6951
GOTERM_CC_DIRECT	GO:0031252~cell leading edge	8	0.00497813	0.0227929	CORO1A, SSH1, FAT1, VIM, ARHGAP1, ITGB4, CLASP2, SSX2IP	1001	56	19662	2.80605	1	0.22674	29.1658
GOTERM_CC_DIRECT	GO:0000794~condensed nuclear chromosome	7	0.00435586	0.0230862	SUN2, STAG3, TOPBP1, BRD4, MLH3, TTN, RAD50	1001	44	19662	3.12492	1	0.225972	29.4831
GOTERM_CC_DIRECT	GO:0044294~dendritic growth cone	3	0.0018668	0.0233171	COBL, PTCH1, MAPK8IP1	1001	5	19662	11.7854	1	0.224694	29.732
GOTERM_BP_DIRECT	GO:0007601~visual perception	14	0.00871172	0.0238592	MYO5A, GLRB, RPGR, MYO7A, PCDH15, MFRP, RD3, CRYBB1, DRAM2, C1QTNF5, IMPG2, PDCL, HSF4, CRYBA4	957	133	18082	1.98889	1	0.787665	35.988
GOTERM_MF_DIRECT	GO:0000979~RNA polymerase II core promoter sequence-specific DNA binding	9	0.00560039	0.024282	TAL1, KDM2B, MTF1, IKZF1, STAT5A, STAT5B, RBPJ, RUNX2, TCF7L2	922	67	17446	2.54175	1	0.508132	32.4052
GOTERM_MF_DIRECT	GO:0005096~GTPase activator activity	21	0.0130676	0.0243056	ALS2, DAB2IP, ABR, ARHGAP19, RANGAP1, TBCK, LLGL2, STXBP5L, RGS11, ARHGAP6, RABEP1, EVI5, RGS3, TBC1D14, ARHGAP1, TBC1D4, WNT11, RANBP1, CDC42EP4, ARAP1, ARHGEF10L	922	235	17446	1.69089	1	0.499202	32.4312
GOTERM_BP_DIRECT	GO:0008283~cell proliferation	20	0.0124453	0.0245511	MORF4L1, EGFR, USPL1, LTK, NCF1, NASP, BCL2L1, TCF7L2, SRC, RPL29, MINA, POC1B, RASGRP4, PRKAR1B, GNG2, LMNTD1, ERCC1, CSF1R, USP13, ERCC2	957	220	18082	1.71768	1	0.791644	36.821
GOTERM_BP_DIRECT	GO:0007049~cell cycle	45	0.028002	0.0247595	TRIOBP, PARD3, LZTS2, PRC1, STK11, USP2, NEK1, HCFC1, NEDD9, PTTG1, WTAP, SRC, LLGL2, EVI5, STAG3, CLASP1, CLASP2, PPP2R2D, TERF2, STAG1, CSNK1A1, ARHGEF2, DAB2IP, ZC3HC1, IKZF1, RAN, NASP, CHTF8, RINT1, TPX2, ARPP19, GAS2, CDK4, UBE2C, RAD50, SPAG8, PLK3, RCC2, RASSF2, KLHL13, MAPRE2, CIT, MAP9, NEK6, BLCAP	957	614	18082	1.38477	1	0.789034	37.07
GOTERM_BP_DIRECT	GO:0006778~porphyrin-containing compound metabolic process	3	0.0018668	0.0250929	SLC11A2, ALAS1, CYP1A2	957	5	18082	11.3367	1	0.788141	37.4661
GOTERM_BP_DIRECT	GO:1904261~positive regulation of basement membrane assembly involved in embryonic body morphogenesis	3	0.0018668	0.0250929	PHLDB1, CLASP1, CLASP2	957	5	18082	11.3367	1	0.788141	37.4661
GOTERM_BP_DIRECT	GO:0071225~cellular response to muramyl dipeptide	3	0.0018668	0.0250929	ARHGEF2, NOD2, NOD1	957	5	18082	11.3367	1	0.788141	37.4661
GOTERM_BP_DIRECT	GO:0097484~dendrite extension	3	0.0018668	0.0250929	BDNF, STK11, CDKL3	957	5	18082	11.3367	1	0.788141	37.4661
GOTERM_CC_DIRECT	GO:0032580~Golgi cisterna membrane	9	0.00560039	0.0253058	ST6GAL1, B4GALT2, TMED2, FUT7, FUT10, GOLIM4, ARAP1, B4GALT5, CANT1	1001	70	19662	2.52545	1	0.238164	31.8416
GOTERM_MF_DIRECT	GO:0030332~cyclin binding	5	0.00311133	0.0263847	CIZ1, USP2, MDFIC, PTCH1, CDK4	922	22	17446	4.30043	1	0.519169	34.6891
GOTERM_BP_DIRECT	GO:0007283~spermatogenesis	32	0.0199125	0.0266479	ACOX1, TDRD7, STK11, NEK1, CREM, DEDD, ADCYAP1R1, ARID4B, TTLL5, BCL2L1, CFAP54, MEI4, MAS1, ODF2, PATZ1, SOX17, KDM5A, TDRD1, ERCC1, PHC2, PAIP2, ATP1A4, ATRX, SPAG8, TBATA, KDM2B, SBF1, CCDC33, CIT, ZMYND15, DNM2, PLEKHA1	957	407	18082	1.48556	1	0.802721	39.2833
GOTERM_BP_DIRECT	GO:0045785~positive regulation of cell adhesion	8	0.00497813	0.0274336	DAB2, DUSP26, TFE3, ADAM8, VAV1, SKAP1, TPM1, SRC	957	56	18082	2.69921	1	0.807093	40.1823
GOTERM_MF_DIRECT	GO:0000166~nucleotide binding	122	0.0759164	0.0274549	RBPMS2, ADCY4, FHIT, TARS2, STK36, RBM4, STARD9, TARDBP, TIA1, RAPGEF3, NMNAT3, EGFR, R3HCC1, RET, RAN, RBFOX3, PIK3CD, DDX39B, SPAG1, CDKL3, HNRNPR, MARK2, MAP4K5, CELF5, ATP9A, RAB17, CELF1, SMARCA2, NEK6, EP400, NEK7, KIF26B, FGFR1, FGFR3, STK11, NEK1, PFKFB1, SETD1A, TMEM63A, MTIF2, EPHB4, SRC, RAB7, HNRNPF, CSF1R, TEC, ADSSL1, MOCS2, KIF3A, AK1, TGFBR2, ACACA, ATP11A, ACACB, ATP11C, MYO10, P…	922	1936	17446	1.19239	1	0.524457	35.8235
GOTERM_MF_DIRECT	GO:0008432~JUN kinase binding	4	0.00248906	0.0281861	SPAG9, MAPK8IP3, MAPK8IP1, DAXX	922	13	17446	5.82213	1	0.525152	36.588
GOTERM_BP_DIRECT	GO:0002087~regulation of respiratory gaseous exchange by neurological system process	4	0.00248906	0.0282976	NLGN3, ATP1A2, TLX3, ADORA1	957	13	18082	5.81368	1	0.812129	41.1565
GOTERM_BP_DIRECT	GO:0048699~generation of neurons	4	0.00248906	0.0282976	FGFR1, TAL1, CIT, THOC2	957	13	18082	5.81368	1	0.812129	41.1565
GOTERM_BP_DIRECT	GO:0043268~positive regulation of potassium ion transport	4	0.00248906	0.0282976	ANK2, DPP6, ADORA1, DLG1	957	13	18082	5.81368	1	0.812129	41.1565
GOTERM_BP_DIRECT	GO:0032147~activation of protein kinase activity	6	0.0037336	0.0283332	SLC11A1, TOM1L1, STK11, TGFBR2, TPX2, DLG1	957	33	18082	3.43536	1	0.807713	41.1963
GOTERM_BP_DIRECT	GO:0001889~liver development	11	0.00684493	0.0283989	COBL, JARID2, ONECUT2, STAT5B, DDX39B, QDPR, ASNS, CAD, SLCO2B1, RHBDD3, MED1	957	95	18082	2.18778	1	0.803673	41.2696
GOTERM_MF_DIRECT	GO:0008289~lipid binding	23	0.0143121	0.0286173	OSBP2, PARD3, NCF1, NSFL1C, ESR1, CYTH2, NR3C1, PEX3, YBX2, MARK2, DYSF, CD36, PACSIN3, CADPS2, STARD9, DOK7, MGLL, SNX13, SNX10, APOL11B, TEC, PLEKHA1, EPN2	922	270	17446	1.61187	1	0.522081	37.0348
GOTERM_MF_DIRECT	GO:0008201~heparin binding	15	0.00933399	0.0288838	NRP2, FGFR1, PTPRC, FBN1, CCDC80, POSTN, ITGAM, SLIT2, RPL29, IMPG2, CFH, ADAMTS1, PTCH1, PCSK6, FN1	922	151	17446	1.87966	1	0.517105	37.3094
GOTERM_MF_DIRECT	GO:0016301~kinase activity	48	0.0298688	0.0291584	FGFR1, FRK, FGFR3, AURKAIP1, STK11, NEK1, FGGY, STK36, PHKA1, PFKFB1, EPHB4, SRC, SNRK, PACSIN3, CKMT1, CAMK2B, PIK3R4, CSF1R, IP6K2, TEC, EGFR, CSNK1A1, IRAK1, RET, SGK1, LTK, LIMK1, AK1, MPP3, TGFBR2, PIK3CD, PI4KA, CDKL3, CDK4, MARK2, DDR1, PLK4, MAP4K5, PLK3, HIPK1, GSK3A, PRKAR1B, MAPK8IP3, TNK2, CIT, GUK1, NEK6, NEK7	922	674	17446	1.34755	1	0.512408	37.5912
GOTERM_CC_DIRECT	GO:0005622~intracellular	99	0.0616043	0.0294088	RPL18, FHIT, ADCY4, TLR3, MAF1, ZFP85, ZFP931, ANK2, TRIM44, TRIM45, RAPGEF3, EGFR, POLI, RBFOX3, PIK3CD, MAP4K5, CD36, 2210418O10RIK, RAB17, RALGPS2, PTH1R, AKAP13, BCL2L1, MTIF2, RAB7, PLCH2, EFR3A, CSF1R, TEC, DVL2, IL23R, ABR, TRIM34B, TRIM34A, TEAD1, SMAD2, DOCK7, TEAD3, VAV1, LGALS9, GM14326, PLK3, SYTL3, RTN4, ZKSCAN6, ZKSCAN1, TRIM2, ZFP879, EVI5, USP10, RANBP1, SHC1, DOCK11, NRG2, STX6, …	1001	1599	19662	1.21613	1	0.267847	36.0089
GOTERM_MF_DIRECT	GO:0001046~core promoter sequence-specific DNA binding	7	0.00435586	0.0299278	NRF1, KMT2A, CREM, ESR1, MTA1, REST, NR4A3	922	45	17446	2.94341	1	0.513798	38.3745
GOTERM_BP_DIRECT	GO:0006897~endocytosis	17	0.0105785	0.0306782	CLTA, CD209D, DAB2, CTTN, RABEP1, PACSIN3, ATP9A, RAB17, LRP8, TNK2, EQTN, FCHO1, SNX10, DNM1, EPN2, SGIP1, DNM2	957	181	18082	1.77462	1	0.823565	43.7633
GOTERM_BP_DIRECT	GO:0006306~DNA methylation	5	0.00311133	0.0307928	ATF7IP, EHMT1, KMT2A, GNAS, EHMT2	957	23	18082	4.10749	1	0.820243	43.886
GOTERM_BP_DIRECT	GO:0007015~actin filament organization	10	0.00622266	0.0308976	ARHGEF2, ARHGAP6, CORO1A, SORBS2, FAT1, TRPV4, TMSB4X, PCDH15, TRF, DLG1	957	83	18082	2.27644	1	0.816856	43.998
GOTERM_BP_DIRECT	GO:0007257~activation of JUN kinase activity	6	0.0037336	0.0318206	SPAG9, DAB2, DAB2IP, MDFIC, MAPK8IP3, TRF	957	34	18082	3.33432	1	0.821717	44.9752
GOTERM_MF_DIRECT	GO:0008013~beta-catenin binding	10	0.00622266	0.0327668	ASH2L, GRIN2B, NUMB, SETD1A, MED12, ESR1, SOX17, CXADR, TCF7L2, KLF4	922	84	17446	2.25261	1	0.538606	41.186
GOTERM_CC_DIRECT	GO:0030496~midbody	13	0.00808946	0.0332276	TRIOBP, LZTS2, PRC1, SSH1, RAN, AGBL5, TXNDC9, RCC2, SVIL, KLHL13, PTCH1, KIF20A, DNM2	1001	130	19662	1.96424	1	0.293495	39.6727
GOTERM_CC_DIRECT	GO:0005819~spindle	12	0.00746719	0.034122	ARHGEF2, PARD3, SPAG8, EVI5, PRC1, CEP170, TPX2, CBX3, NR3C1, DIDO1, KIF20A, ERCC2	1001	116	19662	2.03197	1	0.296334	40.502
GOTERM_CC_DIRECT	GO:0000118~histone deacetylase complex	6	0.0037336	0.0343284	TAL1, SATB2, MECOM, HDAC7, ARHGEF10L, NCOR2	1001	36	19662	3.27373	1	0.294082	40.6919
GOTERM_BP_DIRECT	GO:0060444~branching involved in mammary gland duct morphogenesis	4	0.00248906	0.0346314	DDR1, TBX3, SRC, ETV4	957	14	18082	5.39842	1	0.843283	47.8525
GOTERM_BP_DIRECT	GO:0061014~positive regulation of mRNA catabolic process	4	0.00248906	0.0346314	CNOT1, CNOT7, PRR5L, HNRNPR	957	14	18082	5.39842	1	0.843283	47.8525
GOTERM_BP_DIRECT	GO:0051895~negative regulation of focal adhesion assembly	4	0.00248906	0.0346314	ARHGAP6, RCC2, CLASP2, SRC	957	14	18082	5.39842	1	0.843283	47.8525
GOTERM_BP_DIRECT	GO:0030705~cytoskeleton-dependent intracellular transport	4	0.00248906	0.0346314	MYO10, KIF1B, STARD9, KIF26B	957	14	18082	5.39842	1	0.843283	47.8525
GOTERM_BP_DIRECT	GO:0051489~regulation of filopodium assembly	4	0.00248906	0.0346314	MYO10, FMR1, RAB17, STAU2	957	14	18082	5.39842	1	0.843283	47.8525
GOTERM_BP_DIRECT	GO:0030516~regulation of axon extension	4	0.00248906	0.0346314	BDNF, CTTN, MGLL, DNM2	957	14	18082	5.39842	1	0.843283	47.8525
GOTERM_CC_DIRECT	GO:0005783~endoplasmic reticulum	83	0.0516481	0.0348415	RTN4, TM7SF2, SLC36A1, SEC31A, GRIP1, PCDHA4, BSCL2, EIF5A, TLR3, ALG6, PEX3, SLC35A2, ADORA1, CANT1, PIGK, AGPAT5, DNAJB11, UGT1A7C, PHTF1, ASPH, SLC8B1, FNDC3B, DLG1, PIGA, PLD3, EGFR, H2-K1, SGK1, JKAMP, RINT1, CYP2E1, CYP1A2, PIGN, ERGIC3, PNPLA7, UFL1, ANKRD13C, CD36, TRAPPC9, H6PD, D930015E06RIK, EMC1, AKAP1, DST, SNX10, GGCX, MYO5A, FGFR3, CLU, APOC1, LRBA, TRIM13, SLC38A11, STAU2, STAU1, …	1001	1323	19662	1.23229	1	0.294097	41.1614
GOTERM_BP_DIRECT	GO:0060021~palate development	10	0.00622266	0.0353002	SATB2, BBS7, TBX3, BNC2, TGFBR2, SMAD2, WNT11, ASPH, COL11A2, PLEKHA1	957	85	18082	2.22288	1	0.844929	48.5159
GOTERM_BP_DIRECT	GO:0090316~positive regulation of intracellular protein transport	5	0.00311133	0.0354523	OAZ2, OAZ1, KIF3A, PLK3, PRR5L	957	24	18082	3.93635	1	0.842251	48.6656
GOTERM_BP_DIRECT	GO:0061025~membrane fusion	6	0.0037336	0.0355647	STX6, NSFL1C, ADAM8, STX11, DNM1, DNM2	957	35	18082	3.23905	1	0.839267	48.7761
GOTERM_BP_DIRECT	GO:0030282~bone mineralization	6	0.0037336	0.0355647	FGFR3, PTH1R, WNT11, PHEX, TCF7L2, ERCC2	957	35	18082	3.23905	1	0.839267	48.7761
GOTERM_MF_DIRECT	GO:0031749~D2 dopamine receptor binding	3	0.0018668	0.0362319	GRIN2B, DNM1, DNM2	922	6	17446	9.46095	1	0.567684	44.4546
GOTERM_BP_DIRECT	GO:0045588~positive regulation of gamma-delta T cell differentiation	3	0.0018668	0.0363333	PTPRC, STAT5A, STAT5B	957	6	18082	9.44723	1	0.841765	49.525
GOTERM_BP_DIRECT	GO:0032411~positive regulation of transporter activity	3	0.0018668	0.0363333	SGK1, KMT2A, PON1	957	6	18082	9.44723	1	0.841765	49.525
GOTERM_BP_DIRECT	GO:0045732~positive regulation of protein catabolic process	8	0.00497813	0.0381826	OAZ2, DAB2IP, OAZ1, ATG4B, SOX17, GGA3, RHBDD3, RAB7	957	60	18082	2.51926	1	0.852536	51.2846
GOTERM_BP_DIRECT	GO:0050821~protein stabilization	13	0.00808946	0.038529	ANK2, USP2, CREB1, CLU, NPM1, RASSF2, HCFC1, SOX17, APBB2, TNIP2, APBB1, GAPDH, USP13	957	128	18082	1.91897	1	0.851492	51.6077
GOTERM_BP_DIRECT	GO:0007169~transmembrane receptor protein tyrosine kinase signaling pathway	11	0.00684493	0.0385649	EGFR, FRK, DDR1, RET, BDNF, LTK, TOM1L1, TNK2, EPHB4, CSF1R, TEC	957	100	18082	2.07839	1	0.848135	51.6411
GOTERM_BP_DIRECT	GO:0006886~intracellular protein transport	20	0.0124453	0.0392169	STX6, ASPSCR1, VPS29, CLTA, RAN, MYO7A, TBCK, RAB7, CTTN, TMED2, TOM1L1, EVI5, TBC1D14, TOM1, TBC1D4, SYTL3, AP4B1, STX11, SNX13, GGA3	957	232	18082	1.62883	1	0.849428	52.2434
GOTERM_MF_DIRECT	GO:0005044~scavenger receptor activity	7	0.00435586	0.0395251	LGALS3BP, PRG4, ENPP2, ENDOU, SUSD2, TMPRSS4, CD163	922	48	17446	2.75945	1	0.592326	47.4026
GOTERM_BP_DIRECT	GO:0071364~cellular response to epidermal growth factor stimulus	6	0.0037336	0.0395692	EGFR, DAB2, DAB2IP, STAT5B, CAD, MED1	957	36	18082	3.14908	1	0.848486	52.5658
GOTERM_BP_DIRECT	GO:0010634~positive regulation of epithelial cell migration	6	0.0037336	0.0395692	HIF1A, ENPP2, TGFBR2, CLASP1, CLASP2, SRC	957	36	18082	3.14908	1	0.848486	52.5658
GOTERM_MF_DIRECT	GO:0005089~Rho guanyl-nucleotide exchange factor activity	9	0.00560039	0.0408241	ALS2, ARHGEF2, ABR, ARHGEF25, AKAP13, ARHGEF9, VAV1, DOCK11, ARHGEF10L	922	74	17446	2.30131	1	0.59686	48.5246
GOTERM_BP_DIRECT	GO:0050727~regulation of inflammatory response	8	0.00497813	0.0412461	NLRP6, NOD2, S100A9, ESR1, MAS1, MGLL, MTA1, BRD4	957	61	18082	2.47796	1	0.856977	54.0727
GOTERM_MF_DIRECT	GO:0030247~polysaccharide binding	4	0.00248906	0.041472	PRG4, ENPP2, ENDOU, SUSD2	922	15	17446	5.04584	1	0.595351	49.0758
GOTERM_BP_DIRECT	GO:0010629~negative regulation of gene expression	22	0.0136899	0.0422665	FGFR1, FGFR3, CREB1, FMR1, ESR1, SMAD2, ACACB, REST, CNOT7, MYT1, MYADM, SFMBT2, SLIT2, LGALS9, HNRNPK, CD36, TARDBP, NPM1, CPNE1, TCF4, TERF2, KLF4	957	265	18082	1.5686	1	0.860528	54.9673
GOTERM_MF_DIRECT	GO:0019903~protein phosphatase binding	10	0.00622266	0.0423309	EGFR, PARD3, GRB2, STAT5A, PECAM1, STAT5B, VCAN, AKAP1, SKAP1, CSF1R	922	88	17446	2.15022	1	0.595768	49.7979
GOTERM_CC_DIRECT	GO:0005925~focal adhesion	29	0.0180457	0.0429143	RPL18, TRIOBP, TLN2, VIM, CTTN, DAB2, HNRNPK, CD44, SORBS2, FAT1, NUMB, NPM1, TRPV4, CLASP1, CLASP2, EGFR, PTPRC, ARHGEF2, LIMK1, PI4KA, DOCK7, PALLD, RPL13A, SVIL, CYFIP1, DST, LCP1, DNM2, PARVA	1001	391	19662	1.45685	1	0.345859	48.1072
GOTERM_BP_DIRECT	GO:0090090~negative regulation of canonical Wnt signaling pathway	11	0.00684493	0.0432558	CTHRC1, LZTS2, DAB2, DAB2IP, NKD2, PFDN5, D930015E06RIK, WNT11, WNT9A, SOX17, TCF7L2	957	102	18082	2.03764	1	0.863717	55.8189
GOTERM_BP_DIRECT	GO:0007399~nervous system development	29	0.0180457	0.0441844	RTN4, NRP2, GRIP1, MYT1, ARX, CCDC64, BDNF, NUMB, SEMA3B, CAMK2B, LHX6, TCF4, RET, GLRB, FMR1, NTNG1, DOCK7, AMBRA1, SLIT2, CHRDL1, SEMA6D, GSK3A, SEMA4C, CYFIP1, CIT, TCF12, SMARCA2, SEMA4A, HDAC7	957	377	18082	1.45342	1	0.86639	56.6044
GOTERM_BP_DIRECT	GO:0072661~protein targeting to plasma membrane	5	0.00311133	0.0459267	NKD2, TMED2, ANK2, PTCH1, MYADM	957	26	18082	3.63355	1	0.873782	58.0426
GOTERM_BP_DIRECT	GO:0050919~negative chemotaxis	5	0.00311133	0.0459267	NRP2, SEMA4C, SEMA3B, SLIT2, SEMA4A	957	26	18082	3.63355	1	0.873782	58.0426
GOTERM_BP_DIRECT	GO:0005975~carbohydrate metabolic process	18	0.0112008	0.046292	PHKA2, AMY1, GLB1L, B4GALT2, HYAL3, FGGY, PHKA1, MGAT4C, FUCA2, HAGH, MAN2C1, CHIL1, H6PD, GSK3A, GAPDH, NEU2, IDUA, B4GALT5	957	206	18082	1.65097	1	0.872879	58.3384
GOTERM_CC_DIRECT	GO:0010008~endosome membrane	12	0.00746719	0.0465269	EGFR, VPS29, SLC11A1, RET, TOM1L1, SUN2, GOLIM4, VPS53, TLR3, SHC1, GGA3, RAB7	1001	122	19662	1.93204	1	0.365136	50.9608
GOTERM_CC_DIRECT	GO:0016324~apical plasma membrane	25	0.0155566	0.0469264	EGFR, MYO7A, PTH1R, CRB3, CFTR, ATP6V1B1, SLCO2B1, MFRP, TRF, SLC11A2, IGSF5, C1QTNF5, DRAM2, DAB2, NOD1, CD36, CD44, ANK2, SORBS2, RAB17, NUMB, TRPV4, PDZK1, SCNN1A, FN1	1001	328	19662	1.49713	1	0.363514	51.2672
GOTERM_BP_DIRECT	GO:0050679~positive regulation of epithelial cell proliferation	9	0.00560039	0.0470111	EGFR, NOD2, DAB2IP, KIF3A, HRH3, ESR1, NR4A3, PRL, TCF7L2	957	76	18082	2.2375	1	0.87402	58.9149
GOTERM_BP_DIRECT	GO:0009612~response to mechanical stimulus	8	0.00497813	0.0478411	P2RX7, CD36, CHIL1, TGFBR2, PTCH1, POSTN, ASNS, SRC	957	63	18082	2.3993	1	0.875745	59.5709
GOTERM_BP_DIRECT	GO:0050729~positive regulation of inflammatory response	8	0.00497813	0.0478411	EGFR, TLR11, STAT5A, S100A9, STAT5B, TRPV4, TLR3, ADAM8	957	63	18082	2.3993	1	0.875745	59.5709
GOTERM_MF_DIRECT	GO:0008035~high-density lipoprotein particle binding	3	0.0018668	0.0489756	CD36, PON1, LRP8	922	7	17446	8.10939	1	0.643475	55.069
GOTERM_MF_DIRECT	GO:0070577~lysine-acetylated histone binding	4	0.00248906	0.0490963	BRD3, KMT2A, BRD4, CARM1	922	16	17446	4.73048	1	0.637397	55.1598
GOTERM_MF_DIRECT	GO:0004012~phospholipid-translocating ATPase activity	4	0.00248906	0.0490963	ATP9A, ATP11A, ATP11C, ATP8A1	922	16	17446	4.73048	1	0.637397	55.1598
GOTERM_BP_DIRECT	GO:0002925~positive regulation of humoral immune response mediated by circulating immunoglobulin	3	0.0018668	0.04911	FCER2A, PTPRC, NOD2	957	7	18082	8.09763	1	0.87977	60.5547
GOTERM_BP_DIRECT	GO:0046784~viral mRNA export from host cell nucleus	3	0.0018668	0.04911	DDX39B, THOC6, THOC2	957	7	18082	8.09763	1	0.87977	60.5547
GOTERM_BP_DIRECT	GO:0061072~iris morphogenesis	3	0.0018668	0.04911	HIF1A, HIPK1, PITX2	957	7	18082	8.09763	1	0.87977	60.5547
GOTERM_BP_DIRECT	GO:0060732~positive regulation of inositol phosphate biosynthetic process	3	0.0018668	0.04911	ADCYAP1R1, PTH1R, MAS1	957	7	18082	8.09763	1	0.87977	60.5547
GOTERM_BP_DIRECT	GO:0042593~glucose homeostasis	13	0.00808946	0.0492492	ASPSCR1, HIF1A, CD36, STK11, FBN1, RBM4, TRPV4, PTCH1, SLC8B1, CACNA1C, TCF7L2, NCOR2, STXBP5L	957	133	18082	1.84683	1	0.877685	60.6612
GOTERM_BP_DIRECT	GO:0040015~negative regulation of multicellular organism growth	4	0.00248906	0.0492814	ADRB3, GNAS, PTCH1, PLAC8	957	16	18082	4.72362	1	0.875034	60.6859
GOTERM_BP_DIRECT	GO:0007611~learning or memory	7	0.00435586	0.05119	EGFR, SLC11A2, BDNF, EGR2, GRIN2B, PRKAR1B, ABI2	957	51	18082	2.59336	1	0.882246	62.1186
GOTERM_MF_DIRECT	GO:0045499~chemorepellent activity	5	0.00311133	0.0515026	SEMA6D, SEMA4C, SEMA3B, SLIT2, SEMA4A	922	27	17446	3.50406	1	0.64858	56.9338
GOTERM_MF_DIRECT	GO:0019899~enzyme binding	29	0.0180457	0.0517058	GRB2, UNG, CBX3, CAD, TTN, DAXX, SRC, TAL1, PRMT1, NOD2, OAZ1, GSTM4, NPM1, CNTNAP2, GAPDH, WWOX, EGFR, RCOR3, RCOR1, CREB1, ESR1, CFTR, CYP1A2, CYP2E1, DIS3L, ECM1, LGALS9, HIF1A, CACNA1C	922	384	17446	1.429	1	0.643322	57.0806
GOTERM_BP_DIRECT	GO:0071902~positive regulation of protein serine/threonine kinase activity	5	0.00311133	0.0517413	DAB2IP, STK11, TEAD1, SRC, CSF1R	957	27	18082	3.49897	1	0.882323	62.5231
GOTERM_BP_DIRECT	GO:0007411~axon guidance	14	0.00871172	0.0523388	NRP2, NR4A3, SRC, SLIT2, ARX, BDNF, ZFP280D, MAPK8IP3, ETV1, APBB2, APBB1, CSF1R, KIF26B, FEZ1	957	149	18082	1.77532	1	0.882628	62.957
GOTERM_BP_DIRECT	GO:0043123~positive regulation of I-kappaB kinase/NF-kappaB signaling	14	0.00871172	0.0523388	IRAK1, TRIM13, TLR3, AKAP13, LPAR1, ECM1, CANT1, NOD2, NOD1, CD36, BRD4, TNIP2, EDA, NEK6	957	149	18082	1.77532	1	0.882628	62.957
GOTERM_MF_DIRECT	GO:0050661~NADP binding	6	0.0037336	0.0528825	TM7SF2, FMO5, H6PD, DHCR7, CRYZ, GAPDH	922	39	17446	2.91106	1	0.645197	57.9213
GOTERM_MF_DIRECT	GO:0005200~structural constituent of cytoskeleton	9	0.00560039	0.0530116	FRMD5, TLN2, VIM, SPTBN4, ODF2, MYOM1, TTN, TPM1, SPTB	922	78	17446	2.1833	1	0.639609	58.0126
GOTERM_MF_DIRECT	GO:0016798~hydrolase activity, acting on glycosyl bonds	9	0.00560039	0.0530116	AMY1, MAN2C1, GLB1L, HYAL3, UNG, MACROD2, FUCA2, NEU2, IDUA	922	78	17446	2.1833	1	0.639609	58.0126
GOTERM_BP_DIRECT	GO:0006641~triglyceride metabolic process	6	0.0037336	0.0531684	APOBEC1, CD36, APOC1, CYP2E1, ACSL4, ACSL6	957	39	18082	2.90684	1	0.884054	63.5515
GOTERM_CC_DIRECT	GO:0005578~proteinaceous extracellular matrix	24	0.0149344	0.0531715	GLG1, CTHRC1, LGALS3, SPOCK3, NPNT, FBN1, CCDC80, POSTN, GM13304, ECM1, SLIT2, LGALS3BP, FREM1, IMPG2, COL6A2, WNT11, VCAN, ADAMTS1, WNT9A, FCGBP, PRSS36, COL11A2, COL10A1, FN1	1001	316	19662	1.49182	1	0.397313	55.8306
GOTERM_MF_DIRECT	GO:0019904~protein domain specific binding	23	0.0143121	0.0533992	DVL2, APOBEC1, RAN, GRB2, MYO7A, MED12, CBX3, CNOT1, SRC, XPA, HNRNPK, RCC2, SORBS2, CAPG, GNAS, RAPGEF3, SSX2IP, AKAP1, CACNA1C, ACSL3, RUNX2, ERCC1, HAP1	922	289	17446	1.5059	1	0.635966	58.2856
GOTERM_MF_DIRECT	GO:0003713~transcription coactivator activity	16	0.00995625	0.0540955	GMEB1, MED12, HCFC1, MTA1, NR3C1, TAF6L, DAXX, CITED1, NPM1, SUPT3, SUPT7L, SOX17, KDM5A, CARM1, RNF20, MED1	922	180	17446	1.68195	1	0.634578	58.7717
GOTERM_BP_DIRECT	GO:0032436~positive regulation of proteasomal ubiquitin-dependent protein catabolic process	8	0.00497813	0.0550711	CSNK1A1, DAB2, NKD2, BBS7, CLU, UBE2V2, RCHY1, RNF19B	957	65	18082	2.32547	1	0.890402	64.881
GOTERM_BP_DIRECT	GO:0031532~actin cytoskeleton reorganization	7	0.00435586	0.0553952	MKLN1, CTTN, S100A9, TRPV4, SHC1, CXADR, PARVA	957	52	18082	2.54349	1	0.889376	65.1029
GOTERM_BP_DIRECT	GO:0030048~actin filament-based movement	4	0.00248906	0.0575636	MYO5A, MYO7A, APBB2, APBB1	957	17	18082	4.44576	1	0.896406	66.5534
GOTERM_BP_DIRECT	GO:0046907~intracellular transport	4	0.00248906	0.0575636	BBS7, SPIRE1, RANBP1, DST	957	17	18082	4.44576	1	0.896406	66.5534
GOTERM_BP_DIRECT	GO:0045670~regulation of osteoclast differentiation	4	0.00248906	0.0575636	FGFR3, TFE3, RASSF2, ADAM8	957	17	18082	4.44576	1	0.896406	66.5534
GOTERM_BP_DIRECT	GO:0030518~intracellular steroid hormone receptor signaling pathway	4	0.00248906	0.0575636	MED12, ESR1, CARM1, MED1	957	17	18082	4.44576	1	0.896406	66.5534
GOTERM_BP_DIRECT	GO:0050770~regulation of axonogenesis	5	0.00311133	0.0579379	RET, SSH1, VIM, LRRC4C, MARK2	957	28	18082	3.37401	1	0.895612	66.798
GOTERM_BP_DIRECT	GO:0045921~positive regulation of exocytosis	5	0.00311133	0.0579379	RAB2B, CADPS2, CLASP1, CFTR, CLASP2	957	28	18082	3.37401	1	0.895612	66.798
GOTERM_BP_DIRECT	GO:0001892~embryonic placenta development	5	0.00311133	0.0579379	EGFR, HIF1A, TMED2, SPINT1, MED1	957	28	18082	3.37401	1	0.895612	66.798
GOTERM_BP_DIRECT	GO:0007281~germ cell development	6	0.0037336	0.058234	TDRD7, BCL2L1, EHMT2, TDRD1, ERCC1, FANCC	957	40	18082	2.83417	1	0.894501	66.9902
GOTERM_BP_DIRECT	GO:0048568~embryonic organ development	6	0.0037336	0.058234	TNRC6C, MED12, PTCH1, SOX17, ERCC1, EPN2	957	40	18082	2.83417	1	0.894501	66.9902
GOTERM_BP_DIRECT	GO:0006974~cellular response to DNA damage stimulus	31	0.0192902	0.0582808	MORF4L1, STK11, NEK1, UNG, MORF4L2, MLH3, PTTG1, ASH2L, WDR76, FBXO6, USP10, MGME1, INO80D, ERCC1, FANCB, FANCC, ERCC2, POLK, SGK1, POLI, FMR1, DDX39B, MACROD2, TOPBP1, TANK, RAD50, ATRX, EYA3, XPA, PLK3, APBB1	957	420	18082	1.39459	1	0.892347	67.0205
GOTERM_CC_DIRECT	GO:0005604~basement membrane	10	0.00622266	0.0583778	FREM1, NPNT, FBN1, CCDC80, ITGB4, ADAMTS1, TRF, FN1, COL4A5, VWA2	1001	97	19662	2.02499	1	0.422886	59.3269
GOTERM_BP_DIRECT	GO:0032496~response to lipopolysaccharide	17	0.0105785	0.0584708	ALDOA, IRAK1, IL23R, ABR, STAT5B, MTA1, PRDX2, CYP1A2, CITED1, LGALS9, SLC11A1, P2RX7, NOD2, RPL13A, IL10RA, TRPV4, PRL	957	197	18082	1.63049	1	0.890805	67.1432
GOTERM_BP_DIRECT	GO:0070373~negative regulation of ERK1 and ERK2 cascade	8	0.00497813	0.0589277	NLRP6, DAB2, DAB2IP, DUSP26, PTPRR, BTN2A2, KLF4, DLG1	957	66	18082	2.29024	1	0.890409	67.4365
GOTERM_CC_DIRECT	GO:0032592~integral component of mitochondrial membrane	3	0.0018668	0.05899	MICU1, MFF, SLC8B1	1001	8	19662	7.36588	1	0.421922	59.7205
GOTERM_BP_DIRECT	GO:0006915~apoptotic process	40	0.0248906	0.0592139	FHIT, FGFR3, STK11, SCML2, DEDD, S100A9, EIF5A, BCL2L1, DAXX, DIDO1, CITED1, DAB2, NISCH, NOD1, NAIP2, CHIL1, TIA1, TNIP2, BMF, GAPDH, WWOX, ERCC2, SGK1, DAB2IP, MADD, NCF1, TGFBR2, TPX2, GAS2, MECOM, ELMO2, DRAM2, PLK3, RABEP1, ECSCR, THOC6, APBB1, NEK6, BLCAP, DAP3	957	570	18082	1.32593	1	0.889298	67.619
GOTERM_MF_DIRECT	GO:0031072~heat shock protein binding	7	0.00435586	0.0594446	IRAK1, HNRNPK, LIMK1, NR3C1, PTTG1, ADORA1, ENO1	922	53	17446	2.49912	1	0.664075	62.3335
GOTERM_BP_DIRECT	GO:0048661~positive regulation of smooth muscle cell proliferation	9	0.00560039	0.0603303	EGFR, RBPMS2, IRAK1, HIF1A, TGFBR2, STAT5B, SHC1, NR4A3, RBPJ	957	80	18082	2.12563	1	0.891668	68.3215
GOTERM_BP_DIRECT	GO:0071347~cellular response to interleukin-1	9	0.00560039	0.0603303	DAB2IP, HIF1A, HYAL3, CHIL1, TFPI, USP10, GM13304, TANK, FN1	957	80	18082	2.12563	1	0.891668	68.3215
GOTERM_BP_DIRECT	GO:0006810~transport	112	0.0696938	0.0605754	SLC9A8, SLC36A1, SEC31A, XPO4, UNC50, VPS53, EIF5A, D1ERTD622E, SLC35A2, SLC35A3, DAB2, GRIN2B, GRIN2C, SLC25A22, SLC4A4, SLC8B1, OSBP2, RAN, RINT1, FMR1, DDX39B, SPIRE1, TCN2, ERGIC3, CD36, RAB17, CLIP1, FXYD1, GC, KCNMB4, CLCN2, BBS7, TMEM63A, APOC1, SLC38A11, CACNB4, TRF, KCNMB2, RAB7, SLC11A2, SLC11A1, SLC29A3, OAZ1, SCN9A, STX11, HAP1, SEC61A2, TRPC2, MICU1, SLC6A12, GOLIM4, MPC1, ATP11A, AT…	957	1822	18082	1.16146	1	0.89041	68.4738
GOTERM_BP_DIRECT	GO:0006366~transcription from RNA polymerase II promoter	13	0.00808946	0.061847	DVL2, EGR2, CREB1, STAT5A, POLR2J, STAT5B, ESR1, HIF1A, SUPT3, ETV1, KLF4, MED1, ERCC2	957	138	18082	1.77991	1	0.893331	69.2529
GOTERM_BP_DIRECT	GO:0007067~mitotic nuclear division	22	0.0136899	0.0621623	CSNK1A1, TRIOBP, ARHGEF2, LZTS2, ZC3HC1, RAN, NEK1, ARPP19, TPX2, NEDD9, PTTG1, UBE2C, RCC2, KLHL13, CLASP1, MAPRE2, CLASP2, CIT, MAP9, NEK6, PPP2R2D, STAG1	957	277	18082	1.50064	1	0.892382	69.4432
GOTERM_BP_DIRECT	GO:0051259~protein oligomerization	8	0.00497813	0.0629464	DVL2, IRAK1, HACL1, NOD2, P2RX7, RRM2, NPM1, GJB1	957	67	18082	2.25606	1	0.893295	69.9117
GOTERM_MF_DIRECT	GO:0102391~decanoate--CoA ligase activity	3	0.0018668	0.0630597	ACSL4, ACSL3, ACSL6	922	8	17446	7.09572	1	0.680312	64.575
GOTERM_BP_DIRECT	GO:0060603~mammary gland duct morphogenesis	3	0.0018668	0.0632294	PTCH1, NR3C1, SLIT2	957	8	18082	7.08542	1	0.892238	70.0791
GOTERM_BP_DIRECT	GO:1901223~negative regulation of NIK/NF-kappaB signaling	3	0.0018668	0.0632294	RASSF2, CPNE1, HDAC7	957	8	18082	7.08542	1	0.892238	70.0791
GOTERM_BP_DIRECT	GO:0032731~positive regulation of interleukin-1 beta production	3	0.0018668	0.0632294	NOD2, P2RX7, NOD1	957	8	18082	7.08542	1	0.892238	70.0791
GOTERM_BP_DIRECT	GO:0006163~purine nucleotide metabolic process	3	0.0018668	0.0632294	FHIT, ADSSL1, GUK1	957	8	18082	7.08542	1	0.892238	70.0791
GOTERM_BP_DIRECT	GO:0060992~response to fungicide	3	0.0018668	0.0632294	HIF1A, EHMT1, EHMT2	957	8	18082	7.08542	1	0.892238	70.0791
GOTERM_BP_DIRECT	GO:0030217~T cell differentiation	6	0.0037336	0.0635658	PTPRC, IKZF1, PATZ1, CACNB4, RUNX2, VAV1	957	41	18082	2.76504	1	0.8914	70.277
GOTERM_CC_DIRECT	GO:0005719~nuclear euchromatin	5	0.00311133	0.0637746	ASH2L, CREB1, SETD1A, CBX3, KLF4	1001	30	19662	3.27373	1	0.443432	62.6771
GOTERM_BP_DIRECT	GO:0003151~outflow tract morphogenesis	7	0.00435586	0.0644125	DVL2, HIF1A, TBX3, TGFBR2, WNT11, SOX17, RBPJ	957	54	18082	2.44928	1	0.892552	70.7696
GOTERM_MF_DIRECT	GO:0035259~glucocorticoid receptor binding	4	0.00248906	0.0662131	GRIP1, STAT5B, NR4A3, NCOR2	922	18	17446	4.20487	1	0.692748	66.4276
GOTERM_BP_DIRECT	GO:1900273~positive regulation of long-term synaptic potentiation	4	0.00248906	0.0664549	HNRNPK, GRIN2B, CREB1, STAU1	957	18	18082	4.19877	1	0.898099	71.9261
GOTERM_BP_DIRECT	GO:0045579~positive regulation of B cell differentiation	4	0.00248906	0.0664549	IKZF1, STAT5A, STAT5B, ATP11C	957	18	18082	4.19877	1	0.898099	71.9261
GOTERM_BP_DIRECT	GO:0051693~actin filament capping	4	0.00248906	0.0664549	CAPG, CAPZB, TPM1, SPTB	957	18	18082	4.19877	1	0.898099	71.9261
GOTERM_BP_DIRECT	GO:0031954~positive regulation of protein autophosphorylation	4	0.00248906	0.0664549	TOM1L1, RASSF2, SRC, RAD50	957	18	18082	4.19877	1	0.898099	71.9261
GOTERM_BP_DIRECT	GO:0048546~digestive tract morphogenesis	4	0.00248906	0.0664549	EGFR, HIF1A, FGFR3, STRA6	957	18	18082	4.19877	1	0.898099	71.9261
GOTERM_BP_DIRECT	GO:0060996~dendritic spine development	4	0.00248906	0.0664549	FMR1, SPIRE1, ARID1B, ACSL4	957	18	18082	4.19877	1	0.898099	71.9261
GOTERM_BP_DIRECT	GO:0017144~drug metabolic process	4	0.00248906	0.0664549	FMO5, CAD, CYP2E1, CYP1A2	957	18	18082	4.19877	1	0.898099	71.9261
GOTERM_BP_DIRECT	GO:0051000~positive regulation of nitric-oxide synthase activity	4	0.00248906	0.0664549	FCER2A, NOD1, ESR1, TERF2	957	18	18082	4.19877	1	0.898099	71.9261
GOTERM_BP_DIRECT	GO:0030308~negative regulation of cell growth	12	0.00746719	0.0669884	RTN4, DAB2, DAB2IP, STK11, WNT11, DNAJB2, SOX17, APBB2, SMARCA2, APBB1, SLIT2, IP6K2	957	125	18082	1.81387	1	0.897993	72.2211
GOTERM_BP_DIRECT	GO:0051216~cartilage development	9	0.00560039	0.0677945	SATB2, HIF1A, FGFR3, HYAL3, CD44, TGFBR2, GNAS, COL11A2, COL10A1	957	82	18082	2.07378	1	0.89886	72.6611
GOTERM_MF_DIRECT	GO:0003824~catalytic activity	34	0.021157	0.0685896	PHKA2, HACL1, FHIT, NDST4, APOBEC1, ENPP2, ACCS, PHKA1, PFKFB1, LANCL1, CAD, AZIN2, ALAS1, CKMT1, ACSL4, ACSL3, IMPDH1, ACSL6, MEST, PLD3, NMNAT3, AMY1, ECI2, HYAL3, ACACA, ACACB, DCTN6, ECI3, OXSM, PIGN, MAN2C1, NAALAD2, H6PD, PAICS	922	479	17446	1.3431	1	0.700175	67.7633
GOTERM_CC_DIRECT	GO:0030315~T-tubule	7	0.00435586	0.068627	DYSF, ANK2, ESR1, ADRA1A, ATP1A2, CACNA1C, DLG1	1001	57	19662	2.41222	1	0.464066	65.4679
GOTERM_BP_DIRECT	GO:0007628~adult walking behavior	6	0.0037336	0.0691625	GLRB, SPTBN4, PCDH15, CACNB4, CEND1, CACNA1C	957	42	18082	2.69921	1	0.901646	73.3928
GOTERM_CC_DIRECT	GO:0035371~microtubule plus-end	4	0.00248906	0.0692329	MYO5A, CLIP1, MAPRE2, DST	1001	19	19662	4.13523	1	0.462685	65.8023
GOTERM_BP_DIRECT	GO:0016310~phosphorylation	42	0.0261352	0.0696539	FGFR1, FRK, FGFR3, STK11, NEK1, FGGY, STK36, PFKFB1, EPHB4, SRC, SNRK, CKMT1, CAMK2B, PIK3R4, CSF1R, IP6K2, TEC, EGFR, CSNK1A1, IRAK1, RET, SGK1, LTK, LIMK1, AK1, TGFBR2, PIK3CD, PI4KA, CDKL3, CDK4, MARK2, DDR1, PLK4, MAP4K5, PLK3, HIPK1, GSK3A, TNK2, CIT, GUK1, NEK6, NEK7	957	612	18082	1.29668	1	0.901379	73.6511
GOTERM_BP_DIRECT	GO:0006631~fatty acid metabolic process	14	0.00871172	0.0701092	ACADVL, ACOX1, CD36, CREM, OLAH, STAT5A, STAT5B, ACACA, MGLL, ACACB, ACSL4, ACSL3, ACSL6, OXSM	957	156	18082	1.69566	1	0.900995	73.8883
GOTERM_CC_DIRECT	GO:0005901~caveola	9	0.00560039	0.0708841	FXYD1, CD36, ADCYAP1R1, TGFBR2, CACNA1H, LRP8, PTCH1, ATP1A2, SRC	1001	86	19662	2.0556	1	0.46649	66.6985
GOTERM_MF_DIRECT	GO:0050699~WW domain binding	5	0.00311133	0.0711419	FAM189B, TNK2, SCNN1A, TCEAL3, DNM2	922	30	17446	3.15365	1	0.708153	69.1423
GOTERM_BP_DIRECT	GO:0040008~regulation of growth	8	0.00497813	0.0714723	MORF4L1, OSM, DAB2IP, MORF4L2, TGFBR2, NEDD9, SHC1, PTCH1	957	69	18082	2.19066	1	0.903633	74.5864
GOTERM_BP_DIRECT	GO:0030335~positive regulation of cell migration	17	0.0105785	0.0723389	EGFR, RET, ONECUT2, PIK3CD, SUN2, MYADM, SPAG9, DAB2, CORO1A, NUMB, SEMA4C, WNT11, SEMA3B, SEMA4A, CSF1R, ATP8A1, FN1	957	203	18082	1.58229	1	0.904581	75.021
GOTERM_BP_DIRECT	GO:0008584~male gonad development	11	0.00684493	0.0724823	COL9A3, NASP, ESR1, MAS1, TLR3, PATZ1, BCL2L1, JMJD1C, KDM5A, ERCC1, PITX2	957	112	18082	1.85571	1	0.903191	75.0922
GOTERM_BP_DIRECT	GO:0030036~actin cytoskeleton organization	13	0.00808946	0.0733378	FMNL3, ABR, SSH1, RAN, SPIRE1, PALLD, CAPZB, CORO1A, NISCH, XIRP2, SHC1, TMSB4X, PARVA	957	142	18082	1.72977	1	0.904098	75.5132
GOTERM_CC_DIRECT	GO:0031618~nuclear pericentric heterochromatin	3	0.0018668	0.0733456	ATRX, IKZF1, CBX3	1001	9	19662	6.54745	1	0.474077	67.9939
GOTERM_BP_DIRECT	GO:0008152~metabolic process	33	0.0205348	0.0734707	ACOX1, NDST4, GLB1L, ENPP2, UNG, PFKFB1, WBSCR22, CAD, ALAS1, AGPAT5, UGT1A7C, STARD9, ACSL4, ACSL3, PDHX, ACSL6, IDUA, ECI2, AMY1, HYAL3, ACACA, ACACB, FUCA2, ECI3, PIGN, OXSM, PNPLA7, ACADVL, MAN2C1, NAALAD2, H6PD, NEU2, PAICS	957	463	18082	1.34669	1	0.902695	75.578
GOTERM_MF_DIRECT	GO:0031625~ubiquitin protein ligase binding	22	0.0136899	0.0735839	EGFR, TRIOBP, FHIT, SNCAIP, NKD2, EGR2, JKAMP, USP2, CLU, ABI2, UBE2V2, RANGAP1, SMAD2, AMBRA1, PRR5L, UBE2C, DAXX, TANK, HIF1A, NDUFS2, RNF20, USP13	922	284	17446	1.46578	1	0.715161	70.4097
GOTERM_MF_DIRECT	GO:0005080~protein kinase C binding	7	0.00435586	0.0738107	PARD3, PDLIM5, LDB3, TRPV4, SRC, HDAC7, FEZ1	922	56	17446	2.36524	1	0.710838	70.5249
GOTERM_BP_DIRECT	GO:0031100~organ regeneration	7	0.00435586	0.0742403	TGFBR2, PFKFB1, CAD, NR4A3, CDK4, LCP1, MED1	957	56	18082	2.36181	1	0.903328	75.95
GOTERM_CC_DIRECT	GO:0043197~dendritic spine	13	0.00808946	0.0747213	ALS2, ANKS1B, CTTN, HNRNPK, GRIN2B, FMR1, NR3C1, LPAR1, ATP1A2, ADORA1, CAPZB, APBB1, SYNPO	1001	148	19662	1.72534	1	0.476303	68.6972
GOTERM_BP_DIRECT	GO:0007568~aging	15	0.00933399	0.0749018	IRAK1, GRB2, CREB1, PTH1R, TGFBR2, EIF5A, GLRX2, ADRB3, GSK3A, ENO3, ADRA1A, SHC1, CARM1, EIF2B5, ERCC2	957	173	18082	1.63825	1	0.903611	76.2655
GOTERM_MF_DIRECT	GO:0031434~mitogen-activated protein kinase kinase binding	4	0.00248906	0.075658	DAB2IP, MAPK8IP3, MAPK8IP1, DLG1	922	19	17446	3.98356	1	0.71466	71.4477
GOTERM_BP_DIRECT	GO:0060041~retina development in camera-type eye	9	0.00560039	0.0758019	RET, C1QTNF5, CLCN2, IKZF1, PFDN5, TTLL5, MFRP, SLC4A5, RD3	957	84	18082	2.02441	1	0.904628	76.6886
GOTERM_BP_DIRECT	GO:0032968~positive regulation of transcription elongation from RNA polymerase II promoter	4	0.00248906	0.0759298	DAB2, WDR61, IKZF1, BRD4	957	19	18082	3.97778	1	0.903258	76.7481
GOTERM_BP_DIRECT	GO:0030278~regulation of ossification	4	0.00248906	0.0759298	EGR2, FGFR3, PRL, RUNX2	957	19	18082	3.97778	1	0.903258	76.7481
GOTERM_BP_DIRECT	GO:0016601~Rac protein signal transduction	4	0.00248906	0.0759298	ALS2, NISCH, ABI2, CYFIP1	957	19	18082	3.97778	1	0.903258	76.7481
GOTERM_BP_DIRECT	GO:0048255~mRNA stabilization	4	0.00248906	0.0759298	SLC11A1, APOBEC1, RBM46, YBX2	957	19	18082	3.97778	1	0.903258	76.7481
GOTERM_BP_DIRECT	GO:1900006~positive regulation of dendrite development	4	0.00248906	0.0759298	COBL, DAB2IP, CLIP1, LRP8	957	19	18082	3.97778	1	0.903258	76.7481
GOTERM_MF_DIRECT	GO:0000981~RNA polymerase II transcription factor activity, sequence-specific DNA binding	15	0.00933399	0.0769425	ARX, TAL1, ZKSCAN6, HIF1A, ZMYM4, ZMYM3, GTF2IRD1, ZMYM5, ETV1, SOX17, REST, ETV4, ZFP446, MED1, PITX2	922	174	17446	1.6312	1	0.715628	72.0734
GOTERM_CC_DIRECT	GO:0016235~aggresome	5	0.00311133	0.07737	CLU, ORC6, MECOM, RNF32, SFMBT2	1001	32	19662	3.06912	1	0.484354	70.0109
GOTERM_MF_DIRECT	GO:0008276~protein methyltransferase activity	3	0.0018668	0.0783076	PRMT1, CARM1, TRMT112	922	9	17446	6.3073	1	0.716957	72.7241
GOTERM_MF_DIRECT	GO:0004629~phospholipase C activity	3	0.0018668	0.0783076	PLCH2, PLCD4, ADORA1	922	9	17446	6.3073	1	0.716957	72.7241
GOTERM_MF_DIRECT	GO:0016780~phosphotransferase activity, for other substituted phosphate groups	3	0.0018668	0.0783076	CEPT1, CHPT1, PIGN	922	9	17446	6.3073	1	0.716957	72.7241
GOTERM_BP_DIRECT	GO:0002376~immune system process	28	0.0174234	0.0784707	TFE3, S100A9, TLR3, SKAP1, SRC, NOD2, NOD1, NAIP2, TAP1, CFH, CSF1R, TEC, H2-K1, IRAK1, TLR11, NLRP6, ARHGEF2, DAB2IP, IL23R, CR2, LGALS3, SLA2, PIK3CD, TNFRSF13C, LGALS9, CD300A, RNF19B, SEMA4A	957	383	18082	1.38132	1	0.909137	77.9012
GOTERM_CC_DIRECT	GO:0001891~phagocytic cup	4	0.00248906	0.0784897	CORO1A, PEAR1, LCP1, DNM2	1001	20	19662	3.92847	1	0.485223	70.5506
GOTERM_BP_DIRECT	GO:0033146~regulation of intracellular estrogen receptor signaling pathway	3	0.0018668	0.0785141	UFL1, CARM1, SRC	957	9	18082	6.29815	1	0.907572	77.9204
GOTERM_BP_DIRECT	GO:0086036~regulation of cardiac muscle cell membrane potential	3	0.0018668	0.0785141	FXYD1, ANK2, SLC8B1	957	9	18082	6.29815	1	0.907572	77.9204
GOTERM_BP_DIRECT	GO:0042308~negative regulation of protein import into nucleus	3	0.0018668	0.0785141	MDFIC, CABP1, PKIG	957	9	18082	6.29815	1	0.907572	77.9204
GOTERM_BP_DIRECT	GO:0008064~regulation of actin polymerization or depolymerization	3	0.0018668	0.0785141	CORO1A, SSH1, CIT	957	9	18082	6.29815	1	0.907572	77.9204
GOTERM_BP_DIRECT	GO:0010470~regulation of gastrulation	3	0.0018668	0.0785141	PHLDB1, CLASP1, CLASP2	957	9	18082	6.29815	1	0.907572	77.9204
GOTERM_BP_DIRECT	GO:1902902~negative regulation of autophagosome assembly	3	0.0018668	0.0785141	PHF23, EHMT2, FEZ1	957	9	18082	6.29815	1	0.907572	77.9204
GOTERM_BP_DIRECT	GO:0034138~toll-like receptor 3 signaling pathway	3	0.0018668	0.0785141	TLR3, TNIP2, LGALS9	957	9	18082	6.29815	1	0.907572	77.9204
GOTERM_BP_DIRECT	GO:0002606~positive regulation of dendritic cell antigen processing and presentation	3	0.0018668	0.0785141	SLC11A1, NOD2, NOD1	957	9	18082	6.29815	1	0.907572	77.9204
GOTERM_BP_DIRECT	GO:0006913~nucleocytoplasmic transport	5	0.00311133	0.078769	RAN, RSRC1, ANP32E, NPM1, CITED1	957	31	18082	3.04749	1	0.906626	78.033
GOTERM_BP_DIRECT	GO:0045739~positive regulation of DNA repair	5	0.00311133	0.078769	EGFR, EYA3, TMEM161A, UBE2V2, APBB1	957	31	18082	3.04749	1	0.906626	78.033
GOTERM_BP_DIRECT	GO:0043552~positive regulation of phosphatidylinositol 3-kinase activity	5	0.00311133	0.078769	NOD2, FGFR3, AMBRA1, PIK3R4, SRC	957	31	18082	3.04749	1	0.906626	78.033
GOTERM_BP_DIRECT	GO:0035556~intracellular signal transduction	29	0.0180457	0.0790015	ADCY4, AKAP13, SRC, RGS11, NOD2, NOD1, SNRK, RASGRP4, PLCH2, RASGRP2, PLCD3, SH2B3, PLCD4, SHC1, RAPGEF3, NRG2, TEC, DVL2, EGFR, ARHGEF2, SGK1, ABR, SPSB2, SMAD2, NPR2, VAV1, MARK2, MAP4K5, CIT	957	400	18082	1.36985	1	0.90562	78.1352
GOTERM_BP_DIRECT	GO:0045727~positive regulation of translation	7	0.00435586	0.0794567	EIF4G2, FMR1, RBM4, NPM1, DDX39B, CDK4, EIF2B5	957	57	18082	2.32037	1	0.905272	78.334
GOTERM_BP_DIRECT	GO:0006281~DNA repair	24	0.0149344	0.07947	MORF4L1, POLK, POLI, UNG, MORF4L2, RAD9B, TOPBP1, PTTG1, RAD50, DOT1L, EYA3, ATRX, RECQL, XPA, NPM1, FBXO6, USP10, MGME1, INO80E, INO80D, FANCB, ERCC1, FANCC, ERCC2	957	318	18082	1.426	1	0.903631	78.3397
GOTERM_BP_DIRECT	GO:0043087~regulation of GTPase activity	8	0.00497813	0.0806504	ALS2, ARHGAP6, DAB2IP, EVI5, SBF1, ARHGAP1, MLST8, VAV1	957	71	18082	2.12895	1	0.905412	78.8471
GOTERM_BP_DIRECT	GO:2001237~negative regulation of extrinsic apoptotic signaling pathway	6	0.0037336	0.0811424	DAB2, CTTN, LGALS3, PRDX2, TCF7L2, SRC	957	44	18082	2.57652	1	0.905181	79.0552
GOTERM_BP_DIRECT	GO:0051496~positive regulation of stress fiber assembly	6	0.0037336	0.0811424	LIMK1, WNT11, RAPGEF3, LPAR1, TPM1, ARHGEF10L	957	44	18082	2.57652	1	0.905181	79.0552
GOTERM_CC_DIRECT	GO:0008180~COP9 signalosome	5	0.00311133	0.0846673	NOD2, GRB2, COPS7A, DOCK7, NCKIPSD	1001	33	19662	2.97611	1	0.508306	73.369
GOTERM_CC_DIRECT	GO:0030659~cytoplasmic vesicle membrane	11	0.00684493	0.0850904	CAMKV, ASPSCR1, KIF1B, DYSF, CADPS2, CLIP1, TBC1D4, CFTR, SPIRE1, VOPP1, TNK2	1001	120	19662	1.80055	1	0.505897	73.5525
GOTERM_BP_DIRECT	GO:0061003~positive regulation of dendritic spine morphogenesis	4	0.00248906	0.0859608	LRP8, CAMK2B, CAPRIN1, STAU2	957	20	18082	3.77889	1	0.916582	80.9939
GOTERM_BP_DIRECT	GO:0030517~negative regulation of axon extension	4	0.00248906	0.0859608	RTN4, RNF6, CDKL3, SLIT2	957	20	18082	3.77889	1	0.916582	80.9939
GOTERM_BP_DIRECT	GO:0009653~anatomical structure morphogenesis	4	0.00248906	0.0859608	RET, ONECUT2, FBN1, PITX2	957	20	18082	3.77889	1	0.916582	80.9939
GOTERM_BP_DIRECT	GO:0061098~positive regulation of protein tyrosine kinase activity	4	0.00248906	0.0859608	DVL2, DOK7, LRP8, CSF1R	957	20	18082	3.77889	1	0.916582	80.9939
GOTERM_MF_DIRECT	GO:0017137~Rab GTPase binding	12	0.00746719	0.0861283	MYO5A, ALS2, CCDC64, KIF3A, TMEM127, EVI5, TBC1D14, TBC1D4, PEX5L, TBCK, STXBP5L, LLGL2	922	131	17446	1.7333	1	0.746942	76.1869
GOTERM_BP_DIRECT	GO:0043388~positive regulation of DNA binding	5	0.00311133	0.0864363	HIPK1, IRF4, BRD4, ERCC2, PITX2	957	32	18082	2.95226	1	0.91627	81.1757
GOTERM_BP_DIRECT	GO:0043967~histone H4 acetylation	5	0.00311133	0.0864363	MORF4L1, MORF4L2, IRF4, APBB1, EP400	957	32	18082	2.95226	1	0.91627	81.1757
GOTERM_BP_DIRECT	GO:0045931~positive regulation of mitotic cell cycle	5	0.00311133	0.0864363	TAL1, USP2, STAT5A, STAT5B, ASNS	957	32	18082	2.95226	1	0.91627	81.1757
GOTERM_BP_DIRECT	GO:0007032~endosome organization	5	0.00311133	0.0864363	STX6, ALS2, TMEM127, SNX10, DNM1	957	32	18082	2.95226	1	0.91627	81.1757
GOTERM_CC_DIRECT	GO:0043198~dendritic shaft	7	0.00435586	0.0889053	ARHGEF2, FMR1, LPAR1, HOMER1, CACNA1C, STAU2, KIRREL3	1001	61	19662	2.25404	1	0.517777	75.1547
GOTERM_CC_DIRECT	GO:0030670~phagocytic vesicle membrane	6	0.0037336	0.0891361	H2-K1, SLC11A1, CORO1A, TAP1, RAB7, DNM2	1001	47	19662	2.50754	1	0.514575	75.2486
GOTERM_BP_DIRECT	GO:0021766~hippocampus development	8	0.00497813	0.0904774	RAN, MAS1, LRP8, ZEB2, NR4A3, EIF2B3, EIF2B5, KIRREL3	957	73	18082	2.07063	1	0.924458	82.6559
GOTERM_BP_DIRECT	GO:0032760~positive regulation of tumor necrosis factor production	7	0.00435586	0.0904886	ARHGEF2, NOD2, CD36, NOD1, CLU, TLR3, LGALS9	957	59	18082	2.24172	1	0.923077	82.6599
GOTERM_MF_DIRECT	GO:0003676~nucleic acid binding	77	0.0479145	0.0920732	RBPMS2, ZKSCAN6, RBM4, ZEB2, ZKSCAN1, REST, CNOT7, ZFP85, ZBTB37, YBX2, ZFP644, ZGPAT, ZFP931, ZFP879, TARDBP, TIA1, RBM47, IMPDH1, FIZ1, R3HCC1, ZFP329, EGR2, RBM43, CIZ1, RBFOX3, RBM46, ZFP429, FMR1, DDX39B, ZFP467, SF1, ZFP629, GM14435, GM14434, EXD1, RNASEH2A, MECOM, ZFP27, ZFP827, RECQL, MTF1, CELF5, 2210418O10RIK, CELF1, ZFP229, AKAP1, MATR3, RBM12B1, ENPP2, SETD1A, ZFP661, HNRNPK, TNRC6C, …	922	1237	17446	1.17784	1	0.766122	78.5386
GOTERM_MF_DIRECT	GO:0005543~phospholipid binding	9	0.00560039	0.0928254	DYSF, NSFL1C, SPTBN4, PSD3, PON1, SYTL3, LPAR1, SGIP1, SPTB	922	88	17446	1.9352	1	0.76427	78.8201
GOTERM_MF_DIRECT	GO:0032947~protein complex scaffold	6	0.0037336	0.0936861	CHCHD3, AKAP13, CNOT1, HOMER1, AKAP1, DLG1	922	46	17446	2.46808	1	0.762873	79.138
GOTERM_BP_DIRECT	GO:0051301~cell division	27	0.0168012	0.0938006	TRIOBP, LZTS2, PARD3, PRC1, NEK1, NEDD9, PTTG1, LLGL2, EVI5, CLASP1, CLASP2, PPP2R2D, STAG1, CSNK1A1, ARHGEF2, ZC3HC1, RAN, TPX2, ARPP19, UBE2C, CDK4, RCC2, KLHL13, MAPRE2, MAP9, CIT, NEK6	957	374	18082	1.36404	1	0.928975	83.79
GOTERM_MF_DIRECT	GO:0005154~epidermal growth factor receptor binding	5	0.00311133	0.0940499	CD44, GRB2, SHC1, TNK2, NRG2	922	33	17446	2.86696	1	0.759613	79.271
GOTERM_BP_DIRECT	GO:0006979~response to oxidative stress	12	0.00746719	0.0941888	EGFR, ALS2, XPA, MTF1, UPK3BL, PSIP1, PRDX5, PRDX2, NDUFS2, SLC7A11, ERCC1, ERCC2	957	133	18082	1.70476	1	0.928461	83.9178
GOTERM_BP_DIRECT	GO:1900026~positive regulation of substrate adhesion-dependent cell spreading	5	0.00311133	0.0944505	TRIOBP, DAB2, ENPP2, MYADM, DNM2	957	33	18082	2.8628	1	0.927685	84.0034
GOTERM_BP_DIRECT	GO:0035116~embryonic hindlimb morphogenesis	5	0.00311133	0.0944505	TBX3, GNAS, MECOM, MED1, PITX2	957	33	18082	2.8628	1	0.927685	84.0034
GOTERM_BP_DIRECT	GO:0043523~regulation of neuron apoptotic process	5	0.00311133	0.0944505	BDNF, TRIM2, AKT1S1, NPM1, ESR1	957	33	18082	2.8628	1	0.927685	84.0034
GOTERM_CC_DIRECT	GO:0016323~basolateral plasma membrane	16	0.00995625	0.0946915	EGFR, NKD2, MPZ, PTH1R, CFTR, ATP6V1B1, CXADR, ADORA1, DDR1, NOD2, NOD1, CD44, NUMB, RAB17, SLC4A4, DLG1	1001	203	19662	1.54817	1	0.532864	77.4127
GOTERM_BP_DIRECT	GO:0033762~response to glucagon	3	0.0018668	0.0948017	CREB1, PFKFB1, QDPR	957	10	18082	5.66834	1	0.927101	84.1176
GOTERM_BP_DIRECT	GO:1901800~positive regulation of proteasomal protein catabolic process	3	0.0018668	0.0948017	DAB2IP, FMR1, ECSCR	957	10	18082	5.66834	1	0.927101	84.1176
GOTERM_BP_DIRECT	GO:0032206~positive regulation of telomere maintenance	3	0.0018668	0.0948017	ATRX, RAD50, TERF2	957	10	18082	5.66834	1	0.927101	84.1176
GOTERM_BP_DIRECT	GO:0009062~fatty acid catabolic process	3	0.0018668	0.0948017	ACADVL, ECI2, ACOT7	957	10	18082	5.66834	1	0.927101	84.1176
GOTERM_BP_DIRECT	GO:0060670~branching involved in labyrinthine layer morphogenesis	3	0.0018668	0.0948017	GRB2, SPINT1, LLGL2	957	10	18082	5.66834	1	0.927101	84.1176
GOTERM_BP_DIRECT	GO:0045839~negative regulation of mitotic nuclear division	3	0.0018668	0.0948017	FGFR3, TOM1L1, ESR1	957	10	18082	5.66834	1	0.927101	84.1176
GOTERM_BP_DIRECT	GO:0003143~embryonic heart tube morphogenesis	3	0.0018668	0.0948017	TEAD1, TEAD2, SOX17	957	10	18082	5.66834	1	0.927101	84.1176
GOTERM_BP_DIRECT	GO:2000171~negative regulation of dendrite development	3	0.0018668	0.0948017	GSK3A, CYTH2, CARM1	957	10	18082	5.66834	1	0.927101	84.1176
GOTERM_BP_DIRECT	GO:0010884~positive regulation of lipid storage	3	0.0018668	0.0948017	PLIN5, TMEM135, ACACB	957	10	18082	5.66834	1	0.927101	84.1176
GOTERM_BP_DIRECT	GO:0006596~polyamine biosynthetic process	3	0.0018668	0.0948017	OAZ2, OAZ1, AZIN2	957	10	18082	5.66834	1	0.927101	84.1176
GOTERM_BP_DIRECT	GO:0006687~glycosphingolipid metabolic process	3	0.0018668	0.0948017	ST6GALNAC6, PSAP, CREM	957	10	18082	5.66834	1	0.927101	84.1176
GOTERM_MF_DIRECT	GO:0030215~semaphorin receptor binding	4	0.00248906	0.0961839	SEMA6D, SEMA4C, SEMA3B, SEMA4A	922	21	17446	3.60417	1	0.763092	80.0354
GOTERM_CC_DIRECT	GO:0030175~filopodium	8	0.00497813	0.0962498	MYO10, FAT1, ABI2, TRPV4, RAPGEF3, CXADR, PALLD, LCP1	1001	77	19662	2.04076	1	0.534859	77.9873
GOTERM_BP_DIRECT	GO:0006970~response to osmotic stress	4	0.00248906	0.0965182	EGFR, APOBEC1, PLK3, TRPV4	957	21	18082	3.59895	1	0.929362	84.6649
GOTERM_BP_DIRECT	GO:0048870~cell motility	4	0.00248906	0.0965182	CTTN, MYO10, CCDC80, ITGB4	957	21	18082	3.59895	1	0.929362	84.6649
GOTERM_MF_DIRECT	GO:0035091~phosphatidylinositol binding	9	0.00560039	0.0975502	DAB2, SGK1, NISCH, SBF2, NCF1, DOK7, SNX13, SNX10, PLEKHA1	922	89	17446	1.91345	1	0.763639	80.5109
GOTERM_CC_DIRECT	GO:0031430~M band	4	0.00248906	0.0984961	ALDOA, ANK2, MYOM1, TTN	1001	22	19662	3.57134	1	0.539446	78.7915
GOTERM_BP_DIRECT	GO:0006629~lipid metabolic process	32	0.0199125	0.0985287	TM7SF2, ACOX1, HACL1, NAAA, ENPP2, OLAH, BSCL2, RAB7, FAR1, PLIN5, CEPT1, AGPAT5, DHCR7, PLCH2, PLCD3, PEMT, MGLL, PLCD4, ACSL4, ACSL3, ACSL6, PLD3, PSAP, ACACA, ACACB, CYP1A2, CHPT1, OXSM, PNPLA7, ACADVL, MBOAT7, NEU2	957	459	18082	1.31726	1	0.932105	85.2831
GOTERM_BP_DIRECT	GO:0007010~cytoskeleton organization	10	0.00622266	0.0991112	FMNL3, CAP2, ZMYM4, ZMYM3, SVIL, CAMSAP1, ZNRF1, CAPZB, DST, ELMO2	957	104	18082	1.81678	1	0.931993	85.4578
GOTERM_CC_DIRECT	GO:0019034~viral replication complex	2	0.00124453	0.0991348	FMR1, PI4KA	1001	2	19662	19.6424	1	0.537844	79.0151
GOTERM_CC_DIRECT	GO:0005818~aster	2	0.00124453	0.0991348	TPX2, MAP9	1001	2	19662	19.6424	1	0.537844	79.0151
GOTERM_CC_DIRECT	GO:0070436~Grb2-EGFR complex	2	0.00124453	0.0991348	GRB2, TNK2	1001	2	19662	19.6424	1	0.537844	79.0151
GOTERM_BP_DIRECT	GO:0016055~Wnt signaling pathway	17	0.0105785	0.0999824	DVL2, CSNK1A1, LZTS2, NKD2, TCF7L2, MARK2, DAB2, CD44, WDR61, MACF1, GSK3A, D930015E06RIK, WNT11, WNT9A, SOX17, WWOX, PITX2	957	213	18082	1.50801	1	0.93244	85.7154

## Sheet: GO terms used for mapping
Supplemental Table S12. Go pathways used for mapping in the 6yes9no group
Category	Term	Count	%	PValue	Genes	List Total	Pop Hits	Pop Total	Fold Enrichment	Bonferroni	Benjamini	FDR
GOTERM_BP_DIRECT	regulation of transcription, DNA-templated	161	0.100185	8.39972e-05	MORF4L1, FHIT, STAT5A, STAT5B, MORF4L2, BBX, CBX3, CNOT2, CNOT1, REST, PTTG1, MAF1, CNOT7, ZFP85, CITED1, ZGPAT, ZFP931, MDFIC, TARDBP, PHTF1, PSIP1, PATZ1, FIZ1, PITX2, SATB2, ZFP329, RCOR3, RCOR1, ZFP467, MED12, ZFP629, MTA1, MECOM, ZFP827, KDM2B, HIF1A, MTF1, GTF2IRD1, ZFP280D, 2210418O10RIK, MGA, ST18, RNF20, SMARCA2, TFE3, ONECUT2, CHCHD3, MYT1, ARX, TAL1, HNRNPK, HEXIM2, TEAD4, CASZ1, PBRM1…	957	2279	18082	1.3348	0.272417	0.0764281	0.155056
GOTERM_BP_DIRECT	regulation of cell proliferation	27	0.0168012	0.000175879	FGFR1, FRK, APOBEC1, NR3C1, SRC, MINA, ARX, TAL1, DHCR7, PLCD3, SHC1, TEC, PITX2, EGFR, SGK1, TBX3, JARID2, PRG4, TGFBR2, TEAD1, MECOM, CDK4, HIF1A, PTCH1, TNK2, RBPJ, KLF4	957	227	18082	2.24736	0.486207	0.124699	0.324406
GOTERM_BP_DIRECT	positive regulation of transcription from RNA polymerase II promoter	80	0.0497813	0.000181298	STAT5A, ARID4B, STAT5B, MORF4L2, TLR3, ZEB2, CNOT7, SKAP1, DAXX, NOD2, ASH2L, PSIP1, PATZ1, BRD4, SOX17, HSF4, RAPGEF3, TNIP2, WWOX, PITX2, EGFR, SATB2, DAB2IP, ARHGEF2, EGR2, GMEB1, ZFP467, ESR1, MED12, MECOM, OSM, SPAG8, HIF1A, MTF1, MLLT10, AAMDC, CARM1, SMARCA2, MED1, FGFR1, KMT2A, CREM, TFE3, ONECUT2, NR3C1, MYT1, TCF7L2, TAL1, SLC11A1, HNRNPK, TEAD4, POU2F1, ETV1, RNF10, TCF4, RUNX2, ETV4, …	957	995	18082	1.51915	0.496643	0.108107	0.334386
GOTERM_BP_DIRECT	embryonic hemopoiesis	7	0.00435586	0.000587667	TAL1, HIF1A, TNRC6C, KMT2A, TGFBR2, SH2B3, MED1	957	21	18082	6.29815	0.891993	0.272352	1.08006
GOTERM_BP_DIRECT	protein localization	13	0.00808946	0.000862482	ALS2, MACF1, BBS7, ANK2, GRIN2C, GRIP1, NPM1, LRBA, MAPK8IP3, MLH3, HAP1, DLG1, KIF26B	957	79	18082	3.10922	0.96187	0.335251	1.58134
GOTERM_BP_DIRECT	post-embryonic development	16	0.00995625	0.000977616	KMT2A, STK36, SMAD2, CYP1A2, DLK1, MECOM, MYT1, TCF7L2, LLGL2, DHCR7, SCN9A, MAPK8IP3, GNAS, GIGYF2, ERCC2, PLEKHA1	957	114	18082	2.65185	0.975352	0.337312	1.79063
GOTERM_CC_DIRECT	cytoskeleton	101	0.0628489	1.68576e-08	PRC1, S100A9, RANGAP1, ANK2, STARD9, CEP295, MTA1, TOPBP1, SPIRE1, DCTN6, TXNDC9, MARK2, FOPNL, SPAG8, RCC2, CLIP1, DST, NEK6, NEK7, KIF26B, SPTB, COBL, SSH1, BBS7, TMEM216, NEK1, AKAP13, NEDD9, BCL2L1, DIDO1, CAPZB, SRC, MACF1, CEP170, NPM1, CLASP1, CLASP2, SSX2IP, CDC42EP4, PPP1R42, HAP1, TEC, AGBL2, DVL2, KIF3A, AGBL5, GAS2, MYO10, PLK4, CORO1A, POC1B, PLK3, DZIP1L, MAP9, LZTS2, TLN2, MYO7A, T…	1001	1113	19662	1.78246	1.10922e-05	3.69742e-06	2.52117e-05
GOTERM_CC_DIRECT	membrane	435	0.270686	1.02311e-07	RPL18, ALS2, SLC9A8, PEAR1, VPS53, RANGAP1, GRIN2B, GRIN2C, GNG2, ADAM8, NCF1, MED12, PTPRR, CCDC136, SPIRE1, CYP2E1, CYP1A2, ERGIC3, MARK2, TMEM131, TMEM135, RCC2, GGCX, RALGPS2, ARHGEF25, PTH1R, CHCHD3, BCL2L1, PRRC2C, RAB7, ADRB3, SLC29A3, TMEM127, IMPG2, PEMT, EFR3A, CDC42EP4, SGIP1, DVL2, IL23R, MGAT4C, TGFBR2, ATP11A, MPC1, PCDH15, GAS2, ATP11C, ACACB, OLFR78, RGS3, CD300A, SYTL3, TNK2, RTN…	1001	6998	19662	1.22098	6.73185e-05	1.34641e-05	0.000153013
GOTERM_CC_DIRECT	intracellular membrane-bounded organelle	69	0.0429363	2.79605e-06	ALS2, TM7SF2, ACOX1, CLTA, SEC31A, AURKAIP1, PRDX5, RANGAP1, CNOT1, PEX3, MAF1, DAB2, CTTN, UGT1A7C, EVI5, CISD3, POLK, RET, POLI, MTA1, CYP2E1, CYP1A2, MECOM, SLC7A11, PNPLA7, CD36, H6PD, VCAN, EDA, NEU2, SMARCA2, NEK6, EPN2, GGCX, GLG1, VPS29, FRK, CLU, LLGL2, GLRX2, RAB7, FMO5, METTL22, TMED2, PLIN2, DHCR7, TAP1, CASZ1, POU2F1, ACSL4, ACSL3, GAPDH, ACSL6, EIF4ENIF1, ASPSCR1, ECI2, ATP1A4, ATP1…	1001	751	19662	1.80469	0.00183811	0.000306587	0.00418161
GOTERM_CC_DIRECT	protein complex	59	0.0367137	8.32869e-06	ALS2, RTN4, ADCY4, CAD, PEX3, REST, CXADR, NOD2, PRMT1, CD44, STRA6, USP10, ARHGEF2, RAN, TLE6, DDX39B, ESR1, CFTR, PRPF3, CDK4, TANK, UFL1, CD36, MLLT10, SPATS2L, CARM1, SRCAP, SPTB, PARVA, ALDOA, PARD3, GRB2, STK11, CLU, NR3C1, TPM1, TAL1, RGS11, AKT1S1, COL6A2, SSX2IP, RUNX2, IKZF1, NASP, CRB3, SMAD2, DOT1L, PEX11B, CORO1A, NEB, RASSF2, CACNA1C, RBPJ, APBB1, DNM1, TRMT112, RNF111, SNTA1, DNM2	1001	628	19662	1.84538	0.00546531	0.000782593	0.0124554
GOTERM_CC_DIRECT	transcription factor complex	31	0.0192902	4.09593e-05	CREM, TFE3, TCF7L2, MINA, TAL1, TEAD4, POU2F1, SOX17, TCF4, RUNX2, PITX2, ATF7IP, SATB2, IKZF1, RCOR3, TBX3, CREB1, RCOR1, TEAD1, TEAD2, SMAD2, TEAD3, NR4A3, CDK4, EYA3, NRF1, HIF1A, MGA, RBPJ, TCF12, KLF4	1001	267	19662	2.28057	0.0265918	0.00299016	0.0612399
GOTERM_CC_DIRECT	cell cortex	21	0.0130676	4.1872e-05	DVL2, COBL, PARD3, USP2, MYO7A, TLE6, ITGB4, NEDD9, AKAP13, SPIRE1, ARHGEF9, DAXX, MKLN1, CTTN, MYO10, HNRNPK, MACF1, CLASP1, CLASP2, DST, COL10A1	1001	144	19662	2.86451	0.0271763	0.00275144	0.0626042
GOTERM_CC_DIRECT	cell projection	61	0.0379582	8.62536e-05	RTN4, TTLL5, CAD, D1ERTD622E, MKLN1, CTTN, CNTNAP2, TRPV4, KIRREL3, ANKS1B, DAB2IP, RPGR, FMR1, LDB3, PDE4C, PALLD, FOPNL, RAB17, CLIP1, GNAS, SGCE, DST, LCP1, COBL, SSH1, TSPEAR, BBS7, TMEM216, VIM, ABI2, CYTH2, AZIN2, CFAP54, C1QTNF5, HNRNPK, MACF1, SORBS2, RASGRP2, SCN9A, ODF2, SSX2IP, CLASP2, SCNN1A, HAP1, SYNPO, AGBL2, GLRB, KIF3A, DOCK7, LRRC48, CAPRIN1, MYO10, RNF6, POC1B, SVIL, DZIP1L, CY…	1001	712	19662	1.68284	0.0551766	0.00471861	0.12892
GOTERM_CC_DIRECT	postsynaptic density	28	0.0174234	8.87287e-05	RTN4, ALS2, PDLIM5, CABP1, NR3C1, ADORA1, SRC, HNRNPK, MACF1, ANK2, GRIN2B, SORBS2, GRIN2C, CAMK2B, SYNPO, DLG1, ANKS1B, ARHGEF2, CAP2, FMR1, PSD3, HOMER1, SEMA4C, PTCH1, LRP8, CACNA1C, DST, DNM2	1001	239	19662	2.3012	0.0567143	0.00448117	0.132618
GOTERM_CC_DIRECT	neuron projection	40	0.0248906	0.000217581	MYO5A, RTN4, ALS2, GRIP1, PDLIM5, ADCYAP1R1, CLU, VIM, KLC3, NR3C1, LPAR1, CXADR, DAXX, SRC, STAU1, ACOT7, GRIN2B, HRH3, RASGRP2, HAP1, ENO1, DLG1, SGK1, KIF3A, LIMK1, SLC6A12, AK1, FMR1, QDPR, ESR1, ATP1A2, HOMER1, UFL1, MYO10, KIF1B, CHRNB3, CYFIP1, MAPK8IP3, AHCYL2, MAPK8IP1	1001	420	19662	1.8707	0.133405	0.00950018	0.324914
GOTERM_CC_DIRECT	dendrite	44	0.0273797	0.000359245	MYO5A, ALS2, ADCY4, COBL, CLCN2, GRIP1, HCFC1, ABI2, EIF5A, RANGAP1, MAF1, PEX5L, ADORA1, AZIN2, STAU2, STAU1, GLRX2, BDNF, SORBS2, CAMK2B, PUM2, HAP1, KIRREL3, SYNPO, GLRB, RET, DAB2IP, NCF1, FMR1, NLGN3, HOMER1, HNRNPR, CAPRIN1, PLK3, RAB17, CACNA1H, MAPK8IP3, GNAS, LRP8, SGCE, TNK2, MAPK8IP1, CACNA1C, FEZ1	1001	490	19662	1.7638	0.210555	0.0138111	0.53593
GOTERM_CC_DIRECT	cell-cell adherens junction	32	0.0199125	0.00036743	RTN4, ALDOA, PARD3, PDLIM5, HCFC1, ABI2, RANGAP1, CAPZB, SRC, CTTN, HNRNPK, ARHGAP1, NUMB, RANBP1, LRRFIP1, SSX2IP, DLG1, ENO1, EGFR, COBLL1, DAB2IP, RAN, PI4KA, TXNDC9, MARK2, EIF4G2, CAPG, UBAP2, PAICS, GIGYF2, PARVA, EPN2	1001	316	19662	1.9891	0.214797	0.0133442	0.54811
GOTERM_CC_DIRECT	early endosome	25	0.0155566	0.000538732	STX6, ALS2, MYO5A, RET, ATP11A, TLR3, CFTR, TRF, VPS8, SLC11A2, TMEM230, CORO1A, DYSF, NISCH, TMEM127, RABEP1, TRAPPC9, ATP9A, NUMB, RAB17, CNTNAP2, TOM1, USP10, EQTN, SNX13	1001	226	19662	2.17283	0.298533	0.0184891	0.802688
GOTERM_CC_DIRECT	microtubule	32	0.0199125	0.000655669	LZTS2, PRC1, TTLL5, KLC3, RADIL, DAXX, STAU2, MACF1, STARD9, CEP170, CAMSAP1, ODF2, CLASP1, CLASP2, DLG1, ARHGEF2, KIF3A, FMR1, TPX2, MTA1, KIF1B, RCC2, GSK3A, CLIP1, MAPRE2, MAP9, DST, DNM1, KIF20A, FEZ1, DNM2, KIF26B	1001	327	19662	1.92219	0.350513	0.0203413	0.976124
GOTERM_MF_DIRECT	protein binding	343	0.213437	3.50978e-22	ALS2, CTHRC1, PDLIM5, STAT5A, STAT5B, REST, RADIL, WTAP, ZNRF1, ADORA1, CITED1, BDNF, MEI4, CD44, DNAJB11, GRIN2B, GRIN2C, PLS1, STAG3, PATZ1, ADAM8, FIZ1, WWOX, PITX2, POLK, DAB2IP, ZC3HC1, RCOR3, RAN, NCF1, RCOR1, ZFP467, MECOM, TANK, SPAG9, SPAG8, CD36, TRAPPC9, RAB17, ADAMTS1, GIGYF2, KIF26B, KCNMB4, TDRD7, ARHGEF25, CHCHD3, BCL2L1, CACNB4, MYT1, CAPZB, PEX5L, EPHB4, NAA35, RAB7, PLAA, TAL1, …	922	4092	17446	1.58607	3.74845e-19	3.74845e-19	5.59185e-19
GOTERM_MF_DIRECT	metal ion binding	234	0.14561	2.03769e-06	ADCY4, PDLIM5, S100A9, GM28042, POSTN, REST, ZNRF1, ZFP85, CD209D, ZGPAT, GRIN2B, ZFP931, FSTL5, PLS1, PATZ1, ADAM8, FIZ1, POLK, POLI, ZFP329, ZC3HC1, ZFP467, ZFP629, CYP2E1, CYP1A2, MECOM, TANK, MARK2, ZFP827, MTF1, MLLT10, ZFP280D, FBXL5, ADAMTS1, ST18, NEK6, NEK7, HACL1, FCER2A, ENPP2, NEK1, AKAP13, MYT1, DIDO1, THTPA, MACF1, CASZ1, LHX6, RCHY1, TDRD1, AGBL2, AEBP2, IKZF2, IKZF1, AGBL5, TRIM34…	922	3355	17446	1.31974	0.00217389	0.00108753	0.00324643
GOTERM_MF_DIRECT	microtubule binding	27	0.0168012	2.00067e-05	PRC1, S100A9, KLC3, MACF1, STARD9, CAMSAP1, TRPV4, CLASP1, CLASP2, GAPDH, SGIP1, ARHGEF2, KIF3A, FMR1, GAS2, CFAP44, SPAG8, KIF1B, RCC2, CLIP1, MAPRE2, AKAP1, DST, DNM1, KIF20A, DNM2, KIF26B	922	200	17446	2.55446	0.0211407	0.00709714	0.0318702
GOTERM_MF_DIRECT	guanyl-nucleotide exchange factor activity	23	0.0143121	2.41734e-05	ALS2, ARHGEF2, RALGPS2, ABR, RPGR, ARHGEF25, MADD, PSD3, AKAP13, CYTH2, DOCK7, ARHGEF9, DENND2C, VAV1, SBF1, RASGRP4, RASGRP2, RAPGEF3, ST5, EIF2B3, DOCK11, ARHGEF10L, EIF2B5	922	156	17446	2.78977	0.0254871	0.0051502	0.0385065
GOTERM_MF_DIRECT	actin binding	35	0.0217793	0.000239286	GC, MYO5A, TRIOBP, COBL, SSH1, TLN2, MYO7A, PDLIM5, TPM1, CAPZB, NOD2, MACF1, PLS1, TRPV4, PPP1R42, SCNN1A, SYNPO, FMNL3, CAP2, SPTBN4, SPIRE1, PALLD, CORO1A, MYO10, XIRP2, LIMCH1, SVIL, CAPG, CYFIP1, TMSB4X, DST, LCP1, PARVA, SPTB, SNTA1	922	338	17446	1.95937	0.225539	0.0279992	0.380554
GOTERM_MF_DIRECT	kinesin binding	10	0.00622266	0.000282282	SPAG9, KIF3A, PRC1, MAPK8IP3, LRP8, KLC3, MAPK8IP1, DAXX, NEK6, STAU2	922	42	17446	4.50522	0.260307	0.029702	0.44879
GOTERM_MF_DIRECT	protein homodimerization activity	66	0.0410696	0.000313181	ALS2, RBPMS2, MYO7A, DAXX, CD209D, CITED1, CANT1, MFF, ACOT7, NOD1, GSTM4, FGFR1OP2, MGLL, DMRTC1A, LRRFIP1, SLC8B1, IRAK1, DAB2IP, FMR1, QDPR, EXD1, MECOM, DMRTB1, SLIT2, XPA, SBF2, CARM1, DST, FGFR1, KMT2A, ASNS, NR3C1, BCL2L1, TPM1, ADRB3, SLC11A1, TAP1, NPM1, EFR3A, ENO3, CAMK2B, MYOM1, RCHY1, TCF4, ACSL6, TERF2, CSF1R, ENO1, ZBTB7B, ADSSL1, CR2, S100A16, IKZF2, SMAD2, NR4A3, FOXP4, GJB1, PEX…	922	798	17446	1.56497	0.284326	0.029954	0.497801
GOTERM_MF_DIRECT	protein kinase binding	41	0.0255129	0.00043633	MYO5A, PRC1, GRB2, VIM, CNPPD1, BCL2L1, CACNB4, TTN, DAXX, TCF7L2, SKAP1, SRC, NOD2, CD44, TBC1D14, NPM1, TRPV4, CAMK2B, TNIP2, ACSL3, DLG1, EGFR, DVL2, PTPRC, DAB2IP, ZC3HC1, PTPRR, TPX2, NR4A3, HIF1A, TOM1L1, RCC2, GSK3A, DOK7, MAPK8IP1, AKAP1, HDAC7, DNM1, NEK6, KIF20A, DNM2	922	434	17446	1.78755	0.372557	0.0380972	0.692908
GOTERM_MF_DIRECT	cadherin binding involved in cell-cell adhesion	29	0.0180457	0.000847096	RTN4, ALDOA, PDLIM5, HCFC1, RANGAP1, CAPZB, SRC, CTTN, HNRNPK, ARHGAP1, NUMB, RANBP1, LRRFIP1, ENO1, DLG1, EGFR, COBLL1, DAB2IP, RAN, PI4KA, TXNDC9, MARK2, EIF4G2, CAPG, UBAP2, GIGYF2, PAICS, PARVA, EPN2	922	279	17446	1.96679	0.595491	0.0549974	1.34111

## Sheet: All KEGG terms
Supplemental Table S12. All KEGG pathways in the 6yes9no group
Category	Term	Count	%	PValue	Genes	List Total	Pop Hits	Pop Total	Fold Enrichment	Bonferroni	Benjamini	FDR
KEGG_PATHWAY	mmu00061:Fatty acid biosynthesis	7	0.00435586	5.00307e-05	OLAH, ACACA, ACACB, ACSL4, ACSL3, ACSL6, OXSM	417	14	7691	9.22182	0.0131216	0.0131216	0.0655317
KEGG_PATHWAY	mmu04024:cAMP signaling pathway	20	0.0124453	0.0100375	FXYD1, ACOX1, ADCY4, ADCYAP1R1, CREB1, PIK3CD, ATP1A4, CFTR, PDE4C, ATP1A2, ADORA1, VAV1, BDNF, GRIN2B, GRIN2C, GNAS, CAMK2B, PTCH1, RAPGEF3, CACNA1C	417	197	7691	1.87245	0.930282	0.735959	12.3816
KEGG_PATHWAY	mmu04146:Peroxisome	11	0.00684493	0.0136003	FAR1, ACOX1, ECI2, PEX11B, HACL1, PRDX5, PEX3, ACSL4, PEX5L, ACSL3, ACSL6	417	83	7691	2.44434	0.973086	0.700319	16.4243
KEGG_PATHWAY	mmu04961:Endocrine and other factor-regulated calcium reabsorption	8	0.00497813	0.02096	CLTA, PTH1R, ESR1, ATP1A4, GNAS, ATP1A2, DNM1, DNM2	417	52	7691	2.83748	0.996273	0.752925	24.2357
KEGG_PATHWAY	mmu05166:HTLV-I infection	24	0.0149344	0.0252965	H2-K1, DVL2, ADCY4, EGR2, TLN2, RAN, CREM, CREB1, STAT5A, PIK3CD, STAT5B, TGFBR2, TNFRSF13C, SMAD2, BCL2L1, PTTG1, CDK4, POLE4, IL15RA, WNT11, RANBP1, WNT9A, H2-T24, DLG1	417	276	7691	1.6038	0.998846	0.741495	28.5167
KEGG_PATHWAY	mmu00230:Purine metabolism	17	0.0105785	0.0325985	FHIT, ADCY4, ADSSL1, POLR1E, AK1, POLR2J, NPR2, POLR3GL, PDE4C, CANT1, POLE4, NUDT9, PDE7A, RRM2, GUK1, IMPDH1, PAICS	417	179	7691	1.75163	0.999841	0.767354	35.2238
KEGG_PATHWAY	mmu05202:Transcriptional misregulation in cancer	16	0.00995625	0.0332016	ASPSCR1, KMT2A, TGFBR2, TFE3, SPINT1, BCL2L1, NR4A3, ITGAM, DOT1L, ETV1, SUPT3, JMJD1C, TLX3, RUNX2, ETV4, CSF1R	417	165	7691	1.78847	0.999866	0.720131	35.7508
KEGG_PATHWAY	mmu04640:Hematopoietic cell lineage	10	0.00622266	0.0394035	FCER2A, SIGLECH, CD37, CR2, CD36, CD44, CD33, IL11RA1, ITGAM, CSF1R	417	85	7691	2.16984	0.999975	0.734629	40.9462
KEGG_PATHWAY	mmu05220:Chronic myeloid leukemia	9	0.00560039	0.0396551	GRB2, STAT5A, TGFBR2, PIK3CD, STAT5B, SHC1, BCL2L1, MECOM, CDK4	417	72	7691	2.30546	0.999977	0.694837	41.1486
KEGG_PATHWAY	mmu04911:Insulin secretion	10	0.00622266	0.0420028	KCNMB4, ADCY4, ADCYAP1R1, CREB1, ATP1A4, GNAS, CAMK2B, ATP1A2, CACNA1C, KCNMB2	417	86	7691	2.14461	0.999988	0.677881	43.0059
KEGG_PATHWAY	mmu04261:Adrenergic signaling in cardiomyocytes	14	0.00871172	0.043278	ADCY4, CREB1, CREM, ATP1A4, ATP1A2, CACNB4, TPM1, CACNA2D4, ADRA1A, GNAS, CAMK2B, RAPGEF3, CACNA1C, PPP2R2D	417	142	7691	1.81839	0.999992	0.654174	43.992
KEGG_PATHWAY	mmu01212:Fatty acid metabolism	7	0.00435586	0.0556874	ACADVL, ACOX1, ACACA, ACSL4, ACSL3, ACSL6, OXSM	417	51	7691	2.53148	1	0.716504	52.798
KEGG_PATHWAY	mmu05100:Bacterial invasion of epithelial cells	9	0.00560039	0.058942	CTTN, CLTA, PIK3CD, SHC1, SRC, ELMO2, DNM1, FN1, DNM2	417	78	7691	2.12811	1	0.708787	54.8856
KEGG_PATHWAY	mmu04390:Hippo signaling pathway	14	0.00871172	0.064737	DVL2, PARD3, TGFBR2, TEAD1, TEAD2, SMAD2, TEAD3, TCF7L2, LLGL2, TEAD4, WNT11, WNT9A, PPP2R2D, DLG1	417	151	7691	1.71001	1	0.71693	58.393
KEGG_PATHWAY	mmu03013:RNA transport	15	0.00933399	0.0760459	RAN, PAIP1, FMR1, DDX39B, RANGAP1, NXT2, EIF4G2, THOC6, SRRM1, CYFIP1, GEMIN8, THOC2, EIF2B3, GEMIN5, EIF2B5	417	170	7691	1.62738	1	0.751431	64.5234
KEGG_PATHWAY	mmu04713:Circadian entrainment	10	0.00622266	0.0823807	ADCY4, GRIN2B, GRIN2C, ADCYAP1R1, CREB1, CACNA1H, GNAS, GNG2, CAMK2B, CACNA1C	417	98	7691	1.882	1	0.757935	67.5814
KEGG_PATHWAY	mmu05200:Pathways in cancer	29	0.0180457	0.084745	FGFR1, ADCY4, FGFR3, GRB2, STAT5A, STAT5B, BCL2L1, LPAR1, TCF7L2, RASGRP4, RASGRP2, GNG2, CSF1R, FN1, DVL2, EGFR, RET, PIK3CD, TGFBR2, SMAD2, CDK4, MECOM, COL4A5, HIF1A, NCOA4, GNAS, WNT11, PTCH1, WNT9A	417	395	7691	1.35409	1	0.747203	68.6589
KEGG_PATHWAY	mmu04919:Thyroid hormone signaling pathway	11	0.00684493	0.0883799	HIF1A, PIK3CD, MED12, ESR1, PLCD3, TBC1D4, PLCD4, ATP1A4, ATP1A2, SRC, MED1	417	114	7691	1.77965	1	0.742603	70.2511
KEGG_PATHWAY	mmu04520:Adherens junction	8	0.00497813	0.0931701	EGFR, FGFR1, PARD3, TGFBR2, SMAD2, SSX2IP, TCF7L2, SRC	417	72	7691	2.04929	1	0.74306	72.2354
KEGG_PATHWAY	mmu04012:ErbB signaling pathway	9	0.00560039	0.0974084	EGFR, GRB2, STAT5A, PIK3CD, STAT5B, SHC1, CAMK2B, NRG2, SRC	417	87	7691	1.90796	1	0.741486	73.8883
KEGG_PATHWAY	mmu04917:Prolactin signaling pathway	8	0.00497813	0.0985413	GRB2, STAT5A, PIK3CD, STAT5B, ESR1, SHC1, PRL, SRC	417	73	7691	2.02122	1	0.728603	74.3145

## Sheet: KEGG terms used for mapping
Supplementary Table S12. KEGG pathways used for mapping in the 6yes9no group
Category	Term	Count	%	PValue	Genes	List Total	Pop Hits	Pop Total	Fold Enrichment	Bonferroni	Benjamini	FDR
KEGG_PATHWAY	Fatty acid biosynthesis	7	0.00435586	5.00307e-05	OLAH, ACACA, ACACB, ACSL4, ACSL3, ACSL6, OXSM	417	14	7691	9.22182	0.0131216	0.0131216	0.0655317
KEGG_PATHWAY	cAMP signaling pathway	20	0.0124453	0.0100375	FXYD1, ACOX1, ADCY4, ADCYAP1R1, CREB1, PIK3CD, ATP1A4, CFTR, PDE4C, ATP1A2, ADORA1, VAV1, BDNF, GRIN2B, GRIN2C, GNAS, CAMK2B, PTCH1, RAPGEF3, CACNA1C	417	197	7691	1.87245	0.930282	0.735959	12.3816
KEGG_PATHWAY	Peroxisome	11	0.00684493	0.0136003	FAR1, ACOX1, ECI2, PEX11B, HACL1, PRDX5, PEX3, ACSL4, PEX5L, ACSL3, ACSL6	417	83	7691	2.44434	0.973086	0.700319	16.4243
KEGG_PATHWAY	Endocrine and other factor-regulated calcium reabsorption	8	0.00497813	0.02096	CLTA, PTH1R, ESR1, ATP1A4, GNAS, ATP1A2, DNM1, DNM2	417	52	7691	2.83748	0.996273	0.752925	24.2357
KEGG_PATHWAY	HTLV-I infection	24	0.0149344	0.0252965	H2-K1, DVL2, ADCY4, EGR2, TLN2, RAN, CREM, CREB1, STAT5A, PIK3CD, STAT5B, TGFBR2, TNFRSF13C, SMAD2, BCL2L1, PTTG1, CDK4, POLE4, IL15RA, WNT11, RANBP1, WNT9A, H2-T24, DLG1	417	276	7691	1.6038	0.998846	0.741495	28.5167
KEGG_PATHWAY	Purine metabolism	17	0.0105785	0.0325985	FHIT, ADCY4, ADSSL1, POLR1E, AK1, POLR2J, NPR2, POLR3GL, PDE4C, CANT1, POLE4, NUDT9, PDE7A, RRM2, GUK1, IMPDH1, PAICS	417	179	7691	1.75163	0.999841	0.767354	35.2238
KEGG_PATHWAY	Transcriptional misregulation in cancer	16	0.00995625	0.0332016	ASPSCR1, KMT2A, TGFBR2, TFE3, SPINT1, BCL2L1, NR4A3, ITGAM, DOT1L, ETV1, SUPT3, JMJD1C, TLX3, RUNX2, ETV4, CSF1R	417	165	7691	1.78847	0.999866	0.720131	35.7508
KEGG_PATHWAY	Hematopoietic cell lineage	10	0.00622266	0.0394035	FCER2A, SIGLECH, CD37, CR2, CD36, CD44, CD33, IL11RA1, ITGAM, CSF1R	417	85	7691	2.16984	0.999975	0.734629	40.9462
KEGG_PATHWAY	Chronic myeloid leukemia	9	0.00560039	0.0396551	GRB2, STAT5A, TGFBR2, PIK3CD, STAT5B, SHC1, BCL2L1, MECOM, CDK4	417	72	7691	2.30546	0.999977	0.694837	41.1486
KEGG_PATHWAY	Insulin secretion	10	0.00622266	0.0420028	KCNMB4, ADCY4, ADCYAP1R1, CREB1, ATP1A4, GNAS, CAMK2B, ATP1A2, CACNA1C, KCNMB2	417	86	7691	2.14461	0.999988	0.677881	43.0059
KEGG_PATHWAY	Adrenergic signaling in cardiomyocytes	14	0.00871172	0.043278	ADCY4, CREB1, CREM, ATP1A4, ATP1A2, CACNB4, TPM1, CACNA2D4, ADRA1A, GNAS, CAMK2B, RAPGEF3, CACNA1C, PPP2R2D	417	142	7691	1.81839	0.999992	0.654174	43.992
