# Supplementary material for: Identifying lncRNA–miRNA–mRNA networks to investigate Alzheimer’s disease pathogenesis and therapy strategy
Source: Aging (Albany NY). 2020 Feb 7;12(3):2897–920. doi: 10.18632/aging.102785 (PMC7041741; doi:10.18632/aging.102785)
Supplement: Supplementary Table 13 [file aging-12-102785-s010..xlsx]

## Sheet: Genes in the ce network
Supplemental Table S13. Genes in the ceRNA network of the 6no9yes group
gene_name
Rnf168
Atp2a3
1810041L15Rik
Cyb5r1
Kcnq5
Itgal
Nrk
Fgfr3
Endov
Ly6e
St6gal2
4933427D06Rik
Abr
Trim16
Celf5
Echdc2
Get4
B230216G23Rik
Ryk
Hmgb3
Palm2Akap2
Ephb1
Stk17b
Traf7
Tenc1
Ap1g2
Kansl2
Mpeg1
Cacna1g
0610010F05Rik
Phf21a
Stard10
Oaz1
Sirpa
Clu
Egfl7
Lmf1
Col18a1
Ralgps2
Pcsk6
Vash2
Zscan29
Hspb1
Emc1
Ttc33
Mlx
Dhx8
Slc35c2
Pak6
Lcorl
Cpsf6
Oprl1
Gnat2
Kctd20
Paqr7
Mcm7
Lilrb4
Plekhg1
Gm1110
Pik3ip1
Synpo
Rcn3
Bcas3
Ccdc64
Rad23a
Pramef8
Trip4
Ahcyl2
Ccdc28a
Kcnq2
Osbpl3
Dpy19l1
Cul5
Nrsn1
Spata13
Adcyap1r1
Zfp148
Itsn1
Ccm2
Uba1
Park7
Ntrk3
Limch1
Tardbp
Katnal2
Zbtb34
Pcbp4
Snrnp25
Ghr
Speg
Rgs20
Phtf1
Gm8206
Msc
Map2
Eif4a2
Rfwd2
Hectd2
Ing2
Wipf1
Dbn1
Pqlc1
Pdpk1
Golph3l
Erlin1
Bpifb3
Blzf1
B230118H07Rik
Ccdc126
Ncor1
Ttll11
Gtf2i
Adcy10
Trmt1
DLK1
Ralbp1
Mib1
Zfp800
Slco5a1
Rassf5
Atxn1
Rtel1
Lrig1
Rap1gap
Fam168b
Pla2g2d
2610015P09Rik
Tmem214
Zgpat
Tmem219
Agtpbp1
Lphn3
Rhbdd1
Zfp467
Bnip3l
Clspn
Bfar
Ppfia3
Atg7
Akap2
Ikbkg
Arhgap20
Galnt13
Tmub1
Dctd
BC007180
Top3b
Asl
Cacna1c
Osbpl6
Vti1b
Map4k4
Narfl
Iqsec2
Ubxn10
Vwf
Crocc
Flnc
Leprot
D630045J12Rik
Tex264
Kctd15
Dcun1d1
Pmf1
Zzz3
Ltbp1
Rac1
E130114P18Rik
Ccdc114
Tmem63b
Tiam2
Mbnl1
Syp
Shisa7
Tes
Hnrnpa3
Slc13a3
Cdk19
Amotl2
DXBay18
Prkd3
Col12a1
A730017C20Rik
Bri3
Acer2
Ostm1
Snapc4
Crk
Cacna1b
Tgfa
Sybu
Spsb2
Vav3
Stx16
Ttc28
Hspa13
Atxn2l
Uhrf1
Rasal3
Fam111a
Heatr3
Slc30a6
Rnf41
Hmgcs2
Cstf2
Ldb3
Tpd52l2
Pccb
Runx1
Cc2d1b
Syt2
Adar
Aldh18a1
Hmgcr
Igsf1
Neurl3
Pcdh7
Plch1
Ak1
Cdhr4
Lrsam1
Dgkz
Fam227a
Mpv17
Tmcc3
Carkd
Gne
Ripk4
Ccser2
Mapk14
Lnx1
Per1
Hdac5
Dynll2
St14
Apoe
Golga2
Micalcl
Dvl3
Prkar2a
Sycp3
Trp53
Tbp
Cacna1a
Celf2
Foxp2
Sipa1l3
Hmha1
Ak4
Bean1
Il4i1
Ccnd3
Sox8
Alcam
Stk19
BC026585
Suv39h2
Gnas
Etv5
Erg
A630033H20Rik
Ap2m1
Calcoco1
Inca1
Phactr2
Ppp1r1b
Rnmt
Pde1c
Lmo7
Cfap61
Cd36
Mpst
Porcn
Gfap
Mtch2
Gstm1
Magi3
Gramd1c
Vps16
Wdr89
Mark2
Thnsl1
Tspan4
Kcnma1
Tecpr2
Cfh
Sele
Kcns3
Phc2
Prkcd
Pex5
Ikbkb
Car12
Trim11
Slc17a5
Cic
Vps8
Zkscan2
Gps2
Il33
Crem
Rims1
Pkig
Lrrcc1
Col26a1
Trmt2a
Etv1
Actr3
Hk1
Pigc
Dmpk
Nucb1
Phlpp2
Axin2
Aldh7a1
Lgals12
Inpp5d
Oc90
Trim34a
Bpifa1
Slc11a1
Polrmt
Slc2a1
Cdh8
Idi2
Steap2
Zfp157
Fbxo30
Xlr3a
Ecel1
Pdcd1
Cdip1
Tifa
Grip2
Agbl1
Caskin2
Zfand2a
Rgs7
Osbpl5
Gjd4
Esm1
Nol9
Hecw2
Sidt2
Rfx5
D430042O09Rik
Snx10
Oprm1
Tmem164
Sbf2
Sh3kbp1
BC025920
Paip1
Nin
Rgs12
Tcp10b
Eno3
Srrm1
1700020N01Rik
Zxdc
Ehmt2
2010002M12Rik
Ankef1
Stk16
Il15ra
Mllt3
Abcg4
Cpped1
Fam20b
4930402H24Rik
Ccl4
Rabgef1
Scyl3
Atat1
Rsf1
Mocs2
Hsd3b7
Dusp3
Akt2
Stk33
S100pbp
Gucd1
Igsf5
Slc34a3
Smad5
Zfp532
Gabpb1
Acly
Gnb2
Myo18a
Ggt1
Gpr56
Tsen34
Ggnbp1
Slc45a3
Fam102a
Ddr1
Tctex1d4
Tnpo1
Zfp217
Lamc2
Eif2a
Nudt1
Fcgr2b
6330408A02Rik
Ddx55
Mtf2
Btbd11
Mbtd1
Unc5a
Gm9825
Ldlrad3
Slc43a2
Mapre2
Frmd5
Gng7
43710
Btbd6
Tceal7
4932438A13Rik
Rbm41
Nr1h2
Gm28048
Nfib
Rnf11
Cenpo
Dpf3
Foxr2
Ttbk2
Calcr
Eef1d
Tsku
Homez
Tro
Esrp1
Liph
Mynn
St6galnac6
Map4k2
Mob4
Ankrd42
Zfp523
Sf1
Tm7sf2
Sell
Zbtb38
Atf7
Irf8
Phactr3
Stat1
Atg9a
Arl11
Slc10a3
Pgap2
Dcun1d4
Srp68
Gsta3
Dnm3
Luc7l
Ccdc40
Abhd14b
Igtp
Syt1
Fubp3
Zfp422
Ptbp3
Usp19
Esco1
Tom1l2
Abi2
Wbscr27
Arid3a
Rab3d
Ank1
CARNS1
Gan
Snx14
Snx24
Ptpla
Farsa
Elovl1
Ptprj
Elavl4
Stag1
Tnnt2
Cln3
0610037L13Rik
Polq
Sh3rf2
Aoc2
Nit1
Pydc4
Esrra
Lats2
Cav1
PCDHGC5
Eya3
Lysmd4
Optc
Plxdc1
Epb4.1
Pak7
Fhit
Sec61g
Aldh1l2
Tbx6
Gcc2
Wdhd1
Ntng1
A830080D01Rik
Mecom
Zscan22
Capn5
Lrfn1
Mapk10
Col1a2
43716
Nfam1
Cd99l2
Epha7
Adam10
Dazap1
Donson
Zdhhc9
Cnot2
Tor1aip2
Negr1
Mrps23
Pcdh15
Slc33a1
Ift46
Nsmf
Bcor
Apba2
Nrep
Rps15a
Afmid
Hsph1
Gm8113
Acot7
Stau2
Scml2
Adam33
Drp2
C530008M17Rik
Mdk
Suv420h1
Atxn2
Fmnl2
Osbpl1a
Elavl2
Arid1a
Tmem234
Fbxo46
Prpf18
Rapgef6
Npepps
Tpm3
Gm4070
BC004004
Fam193a
Eml2
Arap1
Myom1
Zfp536
C4b
Tead1
Atf7ip
Ktn1
Parp11
Prok2
Pter
Espn
Napepld
Apol6
Arhgap25
Ahdc1
Heph
Fbxo27
Sgk3
Megf10
Atp9a
Cd6
Ank3
Nrxn1
Ube2g2
Spdya
Plin4
Wdr25
Grb10
Adamts9
Brap
Caln1
Anks1b
Bnc2
Pgbd1
Nfat5
St18
Tinagl1
Sox17
Neurl4
Myl4
Pttg1
Sec16a
Lpin2
Agbl4
Zmym3
Cacul1
A830010M20Rik
Lcn2
Fam188a
Cdkl3
Tbkbp1
Prokr2
Lace1
Pde4d
1700055N04Rik
Pigb
Otud7b
Prrg2
Dfna5
Zfp710
L1cam
Tle3
Pcnxl3
Cers1
C330027C09Rik
Kalrn
Rnf141
Synrg
Ankrd13b
Cdh23
Rpgr
Med14
Triobp
Metap2
Ints3
Agbl5
Smtn
Hnrnpk
Dgcr8
Prmt2
Dnah9
Cd151
Timeless
Tenm1
Nfia
Zfp189
Fmn1
Ppp1r18
Dhx34
Slc12a8
Rhobtb1
Hist2h3c2
Csmd3
Ctps2
Lpgat1
Pls3
Hr
Tgfb1i1
Cd209e
Dlgap4
Aptx
Zkscan5
Stx17
Kif9
Adarb2
Slc24a2
Tmem125
Skil
Alox12
Chtf8
Arc
Wdr54
Gm28049
Tsga10
Fam110a
Zfp600
Sema3b
Ciz1
Ap1s2
Plekha6
Cdkl2
Anp32e
Sirt1
Mbtps2
Osbpl9
Cyp26b1
Ppih
Nif3l1
Ptgr2
Fut8
Rasal1
Dhx9
Lmtk3
Crebzf
Ube2i
Tspan5
Rbms3
Tgm1
Dhdds
Kcnj12
Med12l
Nisch
Adam3
Psd4
Spg7
Arhgef9
Trpc7
Raly
Kdm4a
Dnajc13
Foxj3
Cyp2a5
Rcbtb1
Daw1
Gpr22
Pkp4
Lypd6
Umodl1
Nqo2
Itgam
Blvrb
Ehmt1
Tbx4
Cdc7
Cish
Slc16a3
Setd1b
Trp63
Capn3
Arhgef10l
Gng12
Syvn1
Siglech
Cyb561
Add1
Unkl
Cfb
2310022A10Rik
Klhl26
U2af1l4
Tm6sf1
G6pc3
Xiap
Kmt2d
Slc6a15
Cacng6
Tmem143
Mkl2
Tfpi
Fbxl17
Tnfsf15
Prss41
Pisd
Col9a1
Tmbim1
Glra1
Scml4
Cacnb1
Macf1
Slc38a6
Acvrl1
Cbx6
Ccdc151
Ptpn7
Esrrg
Oacyl
Bace1
Cep97
Nbeal2
Safb2
Myo1d
Mpped1
Wnk2
Pla2g6
Pou6f2
43525
Dzank1
Bdnf
Msh2
Apex2
Ccne2
Tars2
Nat6
Vrk1
Otud5
Relb
Prdm1
Fscn1
Gstcd
Wdfy1
Pigx
Lime1
Lhx9
Camsap1
Ccdc186
Eif2s2
Itgb5
Sh2d3c
Serinc1
Itpr2
Duxbl1
Akap5
Igsf10
Rgs6
G2e3
Sorbs2
Azi2
Ehbp1l1
Myo1b
Tbc1d24
Col7a1
Ephb4
Uncx
Rgma
Sec23a
Slx4ip
Hsd11b1
Unc5c
Vwa5b2
Lsp1
Wars
Josd2
Nip7
5730455P16Rik
Myl1
Vwa3a
Musk
Lzts2
Sncaip
Camta2
Dclk2
Hnrnpab
Fnbp1
Astn1
Kcnj16
Nprl3
Vps54
Med1
Zfp280c
Pou4f1
Tfdp2
Tex9
Lasp1
Amigo1
Dtnb
Steap3
Fbf1
Stau1
Hmgn2
Gtpbp8
Dst
Slc12a6
Cdc42bpa
Sub1
Cope
Mak
Akr1b10
Itm2c
Ash2l
Tnik
Ano1
Syt6
Nrg3
Arhgef15
Fam134a
Ndufv1
Adarb1
Pcdh11x
Zbtb20
Ggta1
Ttc3
Schip1
Slco4a1
1110034G24Rik
Gabpb2
Hist1h2bq
Slc15a1
Kank3
Srgn
Hnrnpm
Rps24
Tnfrsf25
Nos1ap
Robo4
Cep250
Dnase2a
Acaa1a
Hfm1
Slc4a5
Zfp423
Sin3a
Cdkn2a
Slc22a13
Fam213a
Gm4723
Vill
Bsg
Shox2
Sirt4
Lgr4
Dbi
Pus10
Postn
Abhd11
Rbm46
Apbb1
Epcam
Eps8
2810474O19Rik
Apol11b
43712
Zmym6
Slc15a5
Ocln
Tctex1d2
Sptlc3
Stmn1
Hnrnph2
Atp5a1
Gemin7
Eif2b2
Bex1
Ncoa6
Gm4861
Ctsa
Shf
Zbtb22
Rd3l
Gon4l
2010315B03Rik
Efcab5
Sc5d
Kat6b
Rad54l
Fhl1
Mettl10
Cdca3
Zfp182
Plgrkt
Tatdn3
Irf5
Kcnt2
Lmod2
Gal3st1
Gm4724
Hspa1b
S100a9
Nsfl1c
Pex12
Men1
Pi4ka
Ttc8
Pfdn4
Htr1d
Selp
Aftph
Kcnk15
Ttc23
Stard6
Spink10
Kdelr1
A4galt
Eomes
Hnrnpf
Morf4l1
Cbx3
Gm648
Slc4a2
Bicc1
Plk4
Ttc21b
Scube2
Cchcr1
Ergic3
Mov10
Timp1
Cfap70
Cript
Bpifb9b
Naa35
Nelfe
Gpatch4
Cntrl
Spata18
Unc13c
Prl
Asgr1
Trem2
Bpifb9a
Fam118b
Gsto2
Sun3
Polr1c
2210404O09Rik
Tnfrsf17
Ephx4
Tshb
Stag2
Ins2
Flcn
Grsf1
Spp1
Cib1
Sspo
Rnf6
Tmem232
Foxg1
Sh3d21
Lig1
Cep112
Cga
Zfp777
Ccl5
Blm
Tpr
Ttr
Sstr1
Folr1
Mgat4c
Nudcd2
Psmg3
Egfem1
Fndc3c1
Ccl3
Nmi
Trappc8
Golga5
Pold2
Muc2
Lsm10
Mff
Gm136
Pomc
Tmem237
Dcc
Trrap
Lamb1
Sipa1
Ddah2
Apex1
Arhgap24
Opn1mw
Tdp1
Ppa2
Shq1
Tac1
Gpr34
S100a16
Setd4
Pih1d1
Olfr283
Pus1
Gpx1
Akr1c18
Tmem176a
Wbp1
Prg4
Cysltr2
Hist2h2aa1
Trim34b
Rhbdd3
Rnf208
Isg20
Chit1
Taf6l
Zbed5
Tecr
Gh
Serpinb6a
Slc7a3
Rps18
Cd63
Tmem255b
Alad
Gm20521
Gm20390

## Sheet: All GO terms
Supplementary Table S13. All Go pathways in the 6no9yes group
Category	Term	Count	%	PValue	Genes	List Total	Pop Hits	Pop Total	Fold Enrichment	Bonferroni	Benjamini	FDR
GOTERM_CC_DIRECT	GO:0005737~cytoplasm	462	0.294076	2.8943e-19	FHIT, LTBP1, CROCC, ISG20, CUL5, PPP1R1B, PHTF1, DDAH2, PLS3, HIST1H2BQ, CDCA3, ARC, TNIK, BTBD6, SCYL3, MECOM, SSPO, BRAP, MARK2, 6330408A02RIK, RPS18, GRB10, NAPEPLD, SSTR1, EIF2S2, HSD11B1, UNC13C, MYO18A, RALGPS2, MOB4, GSTCD, CNTRL, ASL, NAA35, FAM213A, RAC1, ZDHHC9, ARHGEF10L, SPP1, RPS24, IQSEC2, DHX8, DVL3, DHX9, PTGR2, PAIP1, PCDH15, TINAGL1, FNBP1, LASP1, UBA1, CCDC151, MAP2, PKP4, TSGA…	981	6631	19662	1.39644	1.7279e-16	1.7279e-16	4.27173e-16
GOTERM_MF_DIRECT	GO:0005515~protein binding	312	0.198597	7.52134e-14	SYT1, CROCC, SYT2, L1CAM, SYT6, ITSN1, AMOTL2, SYP, ADAM3, CUL5, BDNF, SIN3A, APOE, CDH23, SLC12A6, MAGI3, TNIK, ZFP467, VTI1B, MECOM, SIRPA, GCC2, UHRF1, GRB10, CD36, BACE1, FOXG1, EIF2S2, LAMC2, PRDM1, DBN1, PUS1, CACNB1, GSTCD, HSPA1B, RIMS1, EPHB4, NAA35, EPHB1, ALCAM, NR1H2, MUSK, MOV10, MACF1, RAC1, STX16, BCOR, WDHD1, LAMB1, LHX9, HNRNPAB, IQSEC2, DVL3, DHX9, AGBL1, PAIP1, AGBL4, SMAD5, ES…	916	4092	17446	1.45218	7.89954e-11	7.89954e-11	1.19504e-10
GOTERM_CC_DIRECT	GO:0005634~nucleus	391	0.248883	2.40333e-10	FHIT, INTS3, HIST2H2AA1, ISG20, CUL5, PPP1R1B, PHTF1, DHX34, PTBP3, HIST1H2BQ, STAG2, STAG1, MAGI3, TNIK, LIG1, EOMES, MED14, MECOM, MARK2, 6330408A02RIK, RPS18, ZFP280C, FOXG1, ZZZ3, ST18, UNCX, PUS1, RAD23A, ASL, RAC1, ARHGEF10L, RPS24, DHX8, DHX9, ESRRA, ESRRG, SHOX2, UBA1, TSGA10, RGS6, RGS7, GH, LATS2, CCNE2, DYNLL2, GHR, ATF7IP, CDC7, PGAP2, CLN3, ANP32E, TLE3, OSTM1, FMN1, CCND3, PFDN4, ES…	981	6019	19662	1.302	1.43479e-07	7.17395e-08	3.54711e-07
GOTERM_BP_DIRECT	GO:0006351~transcription, DNA-templated	145	0.0922967	8.52969e-07	MORF4L1, RALY, FHIT, ZXDC, CBX3, CNOT2, TBP, TCEAL7, CBX6, RCBTB1, GABPB1, ZGPAT, CDKN2A, SIN3A, PPP1R1B, TARDBP, PHTF1, TRP63, GABPB2, RELB, ZFP467, EOMES, MED14, ARID1A, MECOM, UHRF1, TIMELESS, ZFP280C, FOXG1, ZZZ3, PRDM1, ST18, MYNN, UNCX, CAMTA2, HMGB3, SETD1B, IL33, TRRAP, SOX8, MED12L, NR1H2, HNRNPK, TFDP2, TRAF7, RUNX1, BCOR, HNRNPAB, TRP53, ESRRA, TRIP4, CREBZF, RFX5, SUB1, SMAD5, ESRRG, …	937	1885	18082	1.48444	0.00301666	0.00301666	0.00156431
GOTERM_CC_DIRECT	GO:0005856~cytoskeleton	93	0.0591972	1.09496e-06	FAM110A, LZTS2, CROCC, S100A9, TTC28, LATS2, TTLL11, ACTR3, FRMD5, D430042O09RIK, NUDCD2, ATAT1, ANK1, CEP250, ANK3, DYNLL2, CAMSAP1, TMUB1, LMOD2, TPR, ADCY10, CIB1, GOLGA2, CEP112, ARC, RPGR, TNIK, RELB, LDB3, GAN, PDE4D, FLNC, ARHGAP24, MARK2, EML2, FMN1, MIB1, SMTN, AKAP5, SH3KBP1, HSPB1, MAPRE2, NEURL4, STMN1, TGFB1I1, DST, MYO18A, SNX10, ADD1, KALRN, CEP97, TRIOBP, LRRCC1, ABI2, CNTRL, KIF9…	981	1113	19662	1.67474	0.000653481	0.000217874	0.00161606
GOTERM_CC_DIRECT	GO:0042995~cell projection	66	0.0420109	1.81641e-06	GFAP, GLRA1, TMEM237, L1CAM, ITSN1, MEGF10, TTLL11, FAM168B, ACTR3, PDPK1, D430042O09RIK, CCDC40, ATAT1, TIAM2, CEP250, UNC5A, ANK3, ADCY10, CIB1, PTPRJ, ANKS1B, ARC, RPGR, LDB3, SCYL3, ARHGEF15, ARHGAP24, AMIGO1, GTF2I, GNAS, DBN1, DST, SPATA13, CRIPT, SNX14, ABI2, STARD10, TTC8, MDK, EPHB1, ESPN, ALCAM, MUSK, HNRNPK, RGS12, IFT46, MACF1, SORBS2, RAC1, LMTK3, WIPF1, SYNPO, SPP1, OSBPL3, MAK, TTC…	981	712	19662	1.8579	0.00108381	0.000271062	0.00268082
GOTERM_BP_DIRECT	GO:0000122~negative regulation of transcription from RNA polymerase II promoter	68	0.043284	3.44022e-06	HMGN2, CNOT2, FLCN, CBX6, MEN1, ZGPAT, SIN3A, HOMEZ, TRP63, POU4F1, SOX17, TPR, ATF7IP, ZBTB20, RELB, PKIG, EOMES, UBE2I, ARID1A, MSC, UHRF1, CD36, CCND3, TIMELESS, MTF2, FOXG1, ST18, PRDM1, MED1, CAV1, FGFR3, HIST2H3C2, CIC, NR1H2, HNRNPK, OTUD7B, PER1, CC2D1B, ZFP217, SKIL, TRAF7, BCOR, HNRNPAB, TRP53, TBX6, ESRRA, EHMT1, RFX5, MAPK10, ZFP148, EHMT2, STAT1, SIRT1, SUV39H2, GPS2, FOXP2, ATXN1, H…	937	729	18082	1.80007	0.0121113	0.00607411	0.00630907
GOTERM_CC_DIRECT	GO:0030425~dendrite	49	0.0311899	6.44424e-06	OPRM1, ACVRL1, LTBP1, GLRA1, L1CAM, KCNJ12, BDNF, APOE, ANK3, TRP63, ADCY10, HTR1D, NEGR1, CIB1, KCNMA1, C4B, UBE2I, ARHGEF15, AMIGO1, PLXDC1, HSPB1, GRIP2, GNAS, ADD1, RAP1GAP, SNX14, CRIPT, ABI2, STAU2, EPHB1, STAU1, ALCAM, RGS12, SORBS2, LMTK3, SYNPO, NIN, FSCN1, DLGAP4, STAT1, ELAVL4, EPHA7, DRP2, MAP2, CACNA1G, NSMF, CACNA1C, CACNA1A, CACNA1B	981	490	19662	2.00428	0.00383983	0.000769149	0.0095107
GOTERM_CC_DIRECT	GO:0005654~nucleoplasm	139	0.0884775	8.5566e-06	MORF4L1, RNMT, FAM20B, CBX3, TBP, D430042O09RIK, CDKN2A, SIN3A, TARDBP, TRP63, SRRM1, TMUB1, STAG2, HIST1H2BQ, STAG1, CIB1, NQO2, TNIK, LIG1, RELB, MED14, ARID1A, MECOM, UHRF1, SYCP3, MYO18A, SPATA13, ADD1, AFTPH, SYVN1, BLM, LRRCC1, CTSA, TRRAP, DAZAP1, HNRNPA3, HNRNPM, VRK1, HNRNPK, HNRNPF, OSBPL1A, SYBU, RNF168, WDHD1, AXIN2, RUNX1, HNRNPAB, DHX8, TRP53, DHX9, EHMT1, TRIP4, CSTF2, PHACTR3, ZMY…	981	1935	19662	1.43977	0.00509528	0.000851023	0.012628
GOTERM_CC_DIRECT	GO:0016020~membrane	412	0.26225	1.46501e-05	SC5D, MPV17, L1CAM, TMEM143, ITSN1, SYP, HMHA1, DHX34, HTR1D, STAG2, GNG7, CDH23, PTPRJ, MAGI3, BSG, ARC, CDHR4, SIPA1L3, MED14, PIK3IP1, SIRPA, ERGIC3, MARK2, RPS18, NAPEPLD, SSTR1, BACE1, ST14, HSD11B1, UNC13C, TM6SF1, MYO18A, RALGPS2, MOB4, CACNB1, CNTRL, ALCAM, MUSK, TMEM125, GOLPH3L, RAC1, ZDHHC9, SYBU, RPS24, DHX9, ACER2, MGAT4C, PCDH15, BFAR, FNBP1, PKP4, TSGA10, RGS6, RGS7, BTBD11, D63004…	981	6998	19662	1.18	0.00870801	0.00124867	0.02162
GOTERM_MF_DIRECT	GO:0046872~metal ion binding	226	0.143856	2.36651e-05	SYT1, ALAD, SYT2, FAM20B, S100A9, POSTN, SYT6, ITSN1, ISG20, HMHA1, ZGPAT, G2E3, PLS3, GGTA1, CDH23, ESCO1, GTPBP8, LIG1, ZFP467, MECOM, BRAP, MARK2, CARNS1, UHRF1, NAPEPLD, ZFP280C, MTF2, EIF2S2, ZZZ3, TGFB1I1, ST18, PRDM1, UNC13C, PLA2G2D, MOB4, RIMS1, NR1H2, MUSK, MACF1, LHX9, COL18A1, ESRRA, AGBL1, ZFP600, AGBL4, AGBL5, SMAD5, MGAT4C, TRIM34A, ESRRG, U2AF1L4, PPA2, GNAT2, RNF6, RNF208, ATP2A3…	916	3355	17446	1.28297	0.0245655	0.0123591	0.0376205
GOTERM_CC_DIRECT	GO:0005829~cytosol	127	0.0808392	3.50816e-05	FHIT, ALAD, VPS54, SYT6, ITSN1, DMPK, GET4, UNC5A, APOE, ATG7, SLC2A1, TRP63, RAPGEF6, CDCA3, RELB, VTI1B, BTBD6, NPEPPS, WNK2, GCC2, GRB10, RPS18, AKR1B10, STMN1, MPST, MOB4, CAV1, CCL3, AFTPH, GNE, CLU, ASL, RASAL1, HNRNPK, OAZ1, TTBK2, STX17, PLCH1, STX16, RAC1, TRAF7, SLC30A6, ARHGEF10L, TRP53, PTPN7, DVL3, ABR, MOCS2, PTGR2, TRIP4, S100A16, OSBPL3, AGBL1, OSBPL6, AGBL4, AGBL5, FSCN1, MYO1D, …	981	1784	19662	1.42681	0.0207263	0.00261459	0.0517648
GOTERM_MF_DIRECT	GO:0008270~zinc ion binding	87	0.055378	5.3738e-05	SPG7, ALAD, RSF1, GLRA1, AGTPBP1, S100A9, LMO7, BC026585, LNX1, PTER, G2E3, MBTD1, RNF141, RABGEF1, PHC2, SEC23A, CIZ1, CAR12, LDB3, SF1, NPEPPS, BRAP, VPS8, RFWD2, 6330408A02RIK, MIB1, ADAMTS9, UHRF1, NAPEPLD, MTF2, ZFAND2A, LIMCH1, ZZZ3, TGFB1I1, ST18, NEURL3, DPF3, KMT2D, ING2, SYVN1, APEX2, XIAP, FHL1, TRIM16, TTC3, TRIM11, NR1H2, ZDHHC9, DTNB, OTUD7B, ADAM33, RNF11, RNF168, PEX12, TRAF7, LHX…	916	1075	17446	1.54139	0.0549148	0.0186506	0.0854085
GOTERM_BP_DIRECT	GO:0006355~regulation of transcription, DNA-templated	159	0.101208	5.79839e-05	MORF4L1, RALY, FHIT, ZXDC, CBX3, CNOT2, TBP, TCEAL7, PTTG1, 1700020N01RIK, CBX6, RCBTB1, GABPB1, ZGPAT, CDKN2A, RNF141, SIN3A, TARDBP, PHTF1, TRP63, GABPB2, RELB, ZFP467, EOMES, MED14, ARID1A, MECOM, UHRF1, TIMELESS, IGSF1, ZFP280C, FOXG1, ZZZ3, PRDM1, ST18, MYNN, UNCX, CAMTA2, HMGB3, SETD1B, TRRAP, SOX8, MED12L, NR1H2, MUSK, HNRNPK, ZFP157, TFDP2, TRAF7, RUNX1, AXIN2, BCOR, LHX9, HNRNPAB, TRP53,…	937	2279	18082	1.34636	0.185666	0.0661707	0.106287
GOTERM_CC_DIRECT	GO:0014069~postsynaptic density	28	0.0178228	6.38048e-05	CRIPT, RIMS1, PDPK1, HNRNPK, MACF1, SORBS2, LRFN1, AXIN2, SYNPO, ANKS1B, DNM3, ARC, ADAM10, MAPK10, MIB1, RGS20, EPS8, DRP2, PKP4, MAP2, AKAP5, GRIP2, NSMF, CACNA1C, DST, DBN1, ADD1, KALRN	981	239	19662	2.34811	0.0373763	0.00422357	0.0941289
GOTERM_BP_DIRECT	GO:0007010~cytoskeleton organization	17	0.010821	8.53019e-05	FMNL2, CCL3, ARC, TNIK, ZMYM3, ZMYM6, SIPA1L3, GAN, SIRPA, VILL, LSP1, PAK7, CAMSAP1, RAC1, CDC42BPA, SH3KBP1, DST	937	104	18082	3.15444	0.260774	0.0727555	0.156326
GOTERM_CC_DIRECT	GO:0048471~perinuclear region of cytoplasm	58	0.0369187	0.000140277	STK33, LTBP1, VPS54, FAM168B, ACTR3, BDNF, PRKAR2A, CEP250, TGFA, CALN1, ADCY10, CIB1, KCNMA1, SEC23A, TNIK, LDB3, VTI1B, PRKCD, GNB2, ATP9A, EIF4A2, AKAP5, LAMC2, GNAS, DBN1, DST, ADD1, KALRN, STK16, CAV1, MOB4, FGFR3, XIAP, CLU, CNTRL, ASL, ITM2C, SORBS2, STX16, TRAF7, LAMB1, APEX1, SPP1, DNM3, MYO1B, AK1, TRPC7, TPD52L2, STAT1, PARK7, ATXN2, TENM1, PKP4, CACNA1G, HEPH, NCOR1, SELE, APBB1	981	692	19662	1.67989	0.08034	0.00834015	0.206837
GOTERM_MF_DIRECT	GO:0016301~kinase activity	59	0.0375552	0.000142858	CDK19, STK33, ACVRL1, FAM20B, LATS2, DMPK, PAK6, PAK7, PDPK1, PRKAR2A, AKT2, CDC7, MAGI3, TNIK, SGK3, NOL9, PI4KA, WNK2, CDKL3, CDKL2, PRKCD, MARK2, DDR1, MAP4K4, NRK, RIPK4, PRKD3, KALRN, STK16, CCL3, ALDH18A1, FGFR3, GNE, MAP4K2, STK17B, HK1, TRRAP, EPHB4, EPHB1, VRK1, MUSK, SPEG, LMTK3, DCLK2, STK19, RYK, MAK, AK1, AK4, MAPK10, NTRK3, EPHA7, PLK4, MAPK14, IKBKG, CDC42BPA, DGKZ, IKBKB, CRK	916	674	17446	1.66722	0.139425	0.0368427	0.2269
GOTERM_CC_DIRECT	GO:0005925~focal adhesion	38	0.0241881	0.000146823	OPRM1, TRIOBP, CAV1, FHL1, TSPAN4, SRP68, LMO7, ITGB5, L1CAM, CD151, ACTR3, ALCAM, PRKAR2A, PDPK1, HNRNPK, ATAT1, SORBS2, RAC1, STX16, SLC4A2, TES, BSG, ADAM10, CAPN5, PI4KA, FLNC, ARHGAP24, RFWD2, RPS18, CCND3, GNB2, LASP1, SH3KBP1, CD99L2, HSPB1, TGFB1I1, DST, ADD1	981	391	19662	1.94789	0.0839273	0.00793738	0.216478
GOTERM_CC_DIRECT	GO:0043025~neuronal cell body	47	0.0299169	0.000226644	CALCR, MOB4, LTBP1, ACVRL1, RAP1GAP, GLRA1, CRIPT, TAC1, L1CAM, KCNJ12, ASL, STAU2, STAU1, ALCAM, BDNF, RGS12, PPP1R1B, PDE1C, APOE, SORBS2, VPS16, ADCY10, NEGR1, GHR, GOLGA2, CIB1, KCNMA1, C4B, DLGAP4, MYO1D, VTI1B, NRXN1, ELAVL4, EPHA7, GTF2I, PLXDC1, MAP2, CACNA1G, AKAP5, GNAS, NRSN1, CACNA1C, APBB1, DBN1, CACNA1A, KALRN, CACNA1B	981	534	19662	1.76407	0.126565	0.0112135	0.333986
GOTERM_BP_DIRECT	GO:0035556~intracellular signal transduction	39	0.0248246	0.000233574	NRG3, ECEL1, STK17B, MAP4K2, ITSN1, LATS2, RASAL1, HMHA1, PDPK1, TIAM2, PPP1R1B, PLCH1, DCLK2, INPP5D, ADCY10, AKT2, DVL3, ABR, TNIK, VAV3, SGK3, SPSB2, WNK2, NFAM1, PRKCD, CISH, MARK2, MAP4K4, RASSF5, MAPK14, RGS6, CDC42BPA, RGS7, DGKZ, HSPB1, UNC13C, SPATA13, PRKD3, KALRN	937	400	18082	1.88153	0.562822	0.152516	0.427501
GOTERM_BP_DIRECT	GO:0016569~covalent chromatin modification	29	0.0184593	0.000296297	MORF4L1, DPF3, KMT2D, ING2, SETD1B, CBX3, TRRAP, CBX6, MEN1, RCBTB1, MBTD1, ASH2L, RNF168, BCOR, EHMT1, KANSL2, ANP32E, ARID1A, EHMT2, SUV39H2, HDAC5, EYA3, UHRF1, MTF2, PHF21A, KDM4A, KAT6B, NCOR1, APBB1	937	266	18082	2.10389	0.649936	0.160493	0.542007
GOTERM_CC_DIRECT	GO:0043005~neuron projection	39	0.0248246	0.000297713	CALCR, OPRM1, SYT1, GLRA1, ADCYAP1R1, CLU, ITSN1, STAU1, TPM3, HNRNPA3, SYP, RGMA, ACOT7, ANK1, ANK3, TRP63, POU4F1, UNC5C, CIB1, CLN3, RALBP1, OPRL1, AK1, MYO1D, MAPK10, PARK7, EPS8, TENM1, SSTR1, MAP2, TSGA10, SH3KBP1, NSMF, STMN1, AHCYL2, NRSN1, KALRN, MPST, CACNA1B	981	420	19662	1.86112	0.162857	0.0135809	0.438499
GOTERM_BP_DIRECT	GO:0016310~phosphorylation	53	0.033736	0.000307015	CDK19, STK33, ACVRL1, FAM20B, LATS2, DMPK, PAK6, PAK7, PDPK1, AKT2, CDC7, TNIK, SGK3, NOL9, PI4KA, WNK2, CDKL3, PRKCD, CDKL2, MARK2, MAP4K4, DDR1, NRK, RIPK4, PRKD3, KALRN, STK16, ALDH18A1, FGFR3, GNE, MAP4K2, STK17B, HK1, EPHB4, EPHB1, VRK1, MUSK, SPEG, LMTK3, DCLK2, STK19, RYK, MAK, AK1, AK4, MAPK10, NTRK3, EPHA7, PLK4, MAPK14, CDC42BPA, DGKZ, IKBKB	937	612	18082	1.67121	0.662981	0.143905	0.561561
GOTERM_MF_DIRECT	GO:0000981~RNA polymerase II transcription factor activity, sequence-specific DNA binding	22	0.0140036	0.00031684	TRP53, ERG, ZMYM3, ZMYM6, SNAPC4, FOXJ3, SOX8, ZKSCAN2, FOXR2, GTF2I, ZBED5, FOXG1, TFDP2, ETV1, POU4F1, SOX17, RUNX1, ZSCAN29, ETV5, NFIA, MED1, NFIB	916	174	17446	2.4081	0.283267	0.0644403	0.502584
GOTERM_MF_DIRECT	GO:0004672~protein kinase activity	48	0.0305534	0.000318961	STK16, CDK19, STK33, CCL3, FGFR3, ACVRL1, STK17B, MAP4K2, HK1, CCL5, EPHB4, LATS2, EPHB1, DMPK, PAK6, PAK7, PDPK1, MUSK, VRK1, TTBK2, SPEG, LMTK3, DCLK2, AKT2, CDC7, TNIK, SGK3, MAK, RYK, WNK2, MAPK10, SCYL3, CDKL3, CDKL2, PRKCD, MARK2, NTRK3, DDR1, MAP4K4, PLK4, EPHA7, MAPK14, CDC42BPA, NRK, RIPK4, IKBKB, PRKD3, KALRN	916	531	17446	1.72166	0.284863	0.0543477	0.505941
GOTERM_BP_DIRECT	GO:1900181~negative regulation of protein localization to nucleus	6	0.00381917	0.000333885	LZTS2, SIN3A, OTUD7B, DCLK2, FLCN, SIRT1	937	13	18082	8.90666	0.693586	0.137441	0.610565
GOTERM_MF_DIRECT	GO:0000166~nucleotide binding	135	0.0859314	0.000442095	RALY, STK33, FHIT, TARS2, TRMT2A, FAM20B, DMPK, PRKAR2A, ARL11, TARDBP, DHX34, RBMS3, PTBP3, HFM1, MAGI3, TNIK, LIG1, GTPBP8, WNK2, CDKL3, CDKL2, BRAP, MARK2, CARNS1, MAP4K4, CELF5, ATP9A, CELF2, RIPK4, PCCB, MYO18A, KALRN, STK16, FGFR3, BLM, GNE, SETD1B, STK17B, MAP4K2, CTPS2, EPHB4, EPHB1, TMEM63B, DAZAP1, HNRNPA3, HNRNPM, MUSK, MOV10, VRK1, HNRNPF, RAC1, RHOBTB1, LMTK3, POLQ, STK19, RPS24, HNR…	916	1936	17446	1.32809	0.371704	0.0642361	0.700615
GOTERM_CC_DIRECT	GO:0005884~actin filament	12	0.00763835	0.000503044	ACTR3, FMN1, MYO1B, RAC1, INPP5D, GNG12, WIPF1, VPS16, LMOD2, DBN1, PLS3, MARK2	981	68	19662	3.53697	0.259473	0.0212281	0.739885
GOTERM_CC_DIRECT	GO:0000785~chromatin	17	0.010821	0.000531277	TRP53, ESCO1, HMGN2, FAM111A, HR, APTX, CBX3, HIST2H3C2, SIRT1, PARK7, SUV39H2, MEN1, SIN3A, TRP63, STAG2, STAG1, MED1	981	126	19662	2.70419	0.271856	0.0209284	0.781259
GOTERM_BP_DIRECT	GO:0006468~protein phosphorylation	49	0.0311899	0.000783992	CDK19, STK33, ACVRL1, EIF2A, LATS2, DMPK, PAK6, PAK7, PDPK1, AKT2, CDC7, TNIK, ADAM10, SGK3, WNK2, SCYL3, CDKL3, PRKCD, CDKL2, MARK2, MAP4K4, DDR1, NRK, RIPK4, PRKD3, KALRN, STK16, CCL3, FGFR3, MAP4K2, STK17B, HK1, EPHB4, EPHB1, VRK1, MUSK, SPEG, DCLK2, LMTK3, RYK, MAK, SMAD5, MAPK10, NTRK3, EPHA7, PLK4, MAPK14, CDC42BPA, IKBKB	937	576	18082	1.64165	0.937837	0.265574	1.42809
GOTERM_MF_DIRECT	GO:0003677~DNA binding	128	0.0814757	0.000795714	HMGN2, TBP, HIST2H2AA1, ZGPAT, CDKN2A, RNF141, SIN3A, TARDBP, PHTF1, TRP63, RABGEF1, SRRM1, HIST1H2BQ, CHTF8, LIG1, RELB, ZFP467, EOMES, ARID1A, MECOM, UHRF1, SYCP3, MTF2, ZFP280C, FOXG1, ZZZ3, PRDM1, ST18, MYNN, UNCX, CAMTA2, HMGB3, BLM, SOX8, NR1H2, HNRNPK, OTUD7B, TFDP2, RUNX1, POLQ, WDHD1, LHX9, HNRNPAB, TRP53, DHX9, ESRRA, ZMYM3, RFX5, SUB1, ZMYM6, SMAD5, ARID3A, ESRRG, TEAD1, ZFP148, RAD54L…	916	1847	17446	1.31991	0.566831	0.0992959	1.2577
GOTERM_MF_DIRECT	GO:0016740~transferase activity	105	0.0668356	0.00100256	STK33, RNMT, TRMT2A, FAM20B, GGT1, DMPK, ELOVL1, GSTM1, G2E3, ATAT1, GGTA1, ESCO1, TNIK, SPTLC3, PARP11, WNK2, CDKL3, CDKL2, MARK2, MAP4K4, RIPK4, PRDM1, MPST, KALRN, STK16, FGFR3, GNE, SETD1B, MAP4K2, STK17B, EPHB4, EPHB1, VRK1, MUSK, ZDHHC9, HECTD2, LMTK3, STK19, POLQ, GAL3ST1, ST6GAL2, DHDDS, EHMT1, MOCS2, RYK, AK1, MGAT4C, AK4, EHMT2, PORCN, SUV39H2, NTRK3, POLRMT, EPHA7, PLK4, HMGCS2, METTL1…	916	1472	17446	1.35857	0.651534	0.110535	1.5822
GOTERM_MF_DIRECT	GO:0051019~mitogen-activated protein kinase binding	7	0.0044557	0.00121999	PTPRJ, MICALCL, GTF2I, ATF7, TPR, SIRT1, STAU2	916	24	17446	5.55504	0.722795	0.12041	1.92224
GOTERM_CC_DIRECT	GO:0031410~cytoplasmic vesicle	51	0.032463	0.00139647	SYT1, OCLN, AP1G2, SYT2, SYT6, AMOTL2, SYP, MFF, BDNF, PDPK1, AP1S2, TGFA, IL15RA, VPS16, KDELR1, CLN3, ARC, NUDT1, ATG9A, SGK3, ANP32E, SLC34A3, MIB1, UHRF1, TRAPPC8, BACE1, SH3KBP1, GNAS, NRSN1, DST, COPE, PPFIA3, CAV1, FGFR3, CLU, ASTN1, IL33, FOLR1, STX17, RAC1, WIPF1, TRAF7, SNX24, AXIN2, OPRL1, MYO1D, CYB561, SLC17A5, RGS20, FNBP1, ARAP1	981	646	19662	1.58233	0.565811	0.0508062	2.04138
GOTERM_CC_DIRECT	GO:0005802~trans-Golgi network	19	0.0120941	0.00140653	CLN3, ATG9A, ADAM10, AP1G2, VPS54, POSTN, GCC2, NUCB1, ATXN2, RGS20, FNBP1, ATP9A, RAC1, BACE1, GOLPH3L, STX16, MYO18A, ARAP1, GH	981	164	19662	2.32203	0.568414	0.048227	2.05594
GOTERM_BP_DIRECT	GO:0045892~negative regulation of transcription, DNA-templated	48	0.0305534	0.00153346	RSF1, CREM, HR, CBX3, GON4L, TCEAL7, FLCN, SOX8, LGR4, TRIM11, ZBTB38, MEN1, NR1H2, ZGPAT, SIN3A, CDKN2A, PRMT2, TFDP2, TRP63, PER1, ZFP217, BCOR, RUNX1, PRAMEF8, LHX9, ATF7IP, TRP53, ZFP423, ZBTB20, EHMT1, CREBZF, RELB, UBE2I, ZFP148, MECOM, SIRT1, CAPN3, SUV39H2, FOXP2, ATXN1, HDAC5, TIMELESS, ZFP280C, MLX, FOXG1, KDM4A, KAT6B, NCOR1	937	579	18082	1.59981	0.995642	0.419327	2.77524
GOTERM_CC_DIRECT	GO:0005794~Golgi apparatus	83	0.0528319	0.00174061	SYT1, AP1G2, VPS54, FAM20B, POSTN, ST6GALNAC6, BLZF1, AP1S2, ATAT1, APOE, BC004004, CALN1, LEPROT, GOLGA5, KDELR1, GGTA1, GOLGA2, SEC23A, PGAP2, CLN3, SYNRG, RPGR, ATG9A, ADAM10, LIG1, VTI1B, SCYL3, MECOM, GCC2, ERGIC3, NUCB1, CD36, ATP9A, BACE1, GNAS, MYO18A, COPE, AFTPH, CAV1, MOB4, FGFR3, ING2, TMEM214, RAP1GAP, FUT8, LMF1, MAP4K2, TRRAP, ITM2C, KCNS3, COL26A1, MACF1, GOLPH3L, ZDHHC9, STX16, S…	981	1190	19662	1.39794	0.646563	0.0561429	2.53845
GOTERM_CC_DIRECT	GO:0030424~axon	33	0.0210055	0.00180739	CALCR, DCC, SYT1, RAP1GAP, SYT2, TAC1, L1CAM, STAU2, EPHB1, FAM168B, ALCAM, BDNF, ATAT1, ANK3, ATG7, LMTK3, VPS16, ADCY10, EIF2B2, SYNPO, CIB1, SLC12A6, DNM3, NIN, C4B, MYO1D, STAT1, SIRT1, PARK7, ITPR2, RNF6, BACE1, HSPB1	981	370	19662	1.7876	0.6604	0.0552561	2.63463
GOTERM_MF_DIRECT	GO:0003779~actin binding	32	0.0203689	0.00181922	TRIOBP, CROCC, VILL, TPM3, ESPN, ACTR3, MACF1, VPS16, WIPF1, MKL2, LMOD2, PLS3, SYNPO, KCNMA1, PPP1R18, FMNL2, ARC, PHACTR3, MYO1B, FSCN1, MYO1D, FLNC, LSP1, TNNT2, FMN1, EPS8, LASP1, LIMCH1, AKAP5, DBN1, DST, ADD1	916	338	17446	1.80316	0.852473	0.159683	2.85366
GOTERM_MF_DIRECT	GO:0003723~RNA binding	61	0.0388283	0.00187741	RALY, RNMT, TARS2, TRMT2A, SRP68, TRMT1, ISG20, SIN3A, DGCR8, PCBP4, TARDBP, DHX34, SRRM1, RBMS3, PTBP3, RBM41, NUDT1, NOL9, RBM46, NIP7, SF1, MBNL1, RPS18, EIF4A2, ESRP1, CELF2, CPSF6, HMGB3, ENDOV, PUS1, SETD1B, PUS10, BICC1, STAU2, DAZAP1, STAU1, HNRNPA3, HNRNPM, MOV10, HNRNPK, HNRNPF, WDHD1, APEX1, HNRNPAB, DHX9, ADARB1, CSTF2, ADARB2, PAIP1, GRSF1, ELAVL2, ELAVL4, U2AF1L4, PARK7, SAFB2, ATXN…	916	780	17446	1.48948	0.86124	0.151754	2.94367
GOTERM_BP_DIRECT	GO:0006915~apoptotic process	47	0.0299169	0.00192914	STEAP3, DCC, FHIT, FGFR3, TMEM214, XIAP, SCML2, S100A9, STK17B, TMEM219, SHF, PDCD1, PAK7, GPX1, G2E3, NISCH, CDKN2A, UNC5A, CDIP1, TRP63, UNC5C, INPP5D, TRAF7, SRGN, AKT2, CIB1, TRP53, MUC2, LGALS12, FAM188A, MECOM, STAT1, RHBDD1, PRKCD, SIRT1, DNASE2A, LSP1, LCN2, 6330408A02RIK, BFAR, RASSF5, EPHA7, MAPK14, BNIP3L, SH3KBP1, APBB1, RNF41	937	570	18082	1.59122	0.998929	0.463013	3.47942
GOTERM_CC_DIRECT	GO:0072686~mitotic spindle	9	0.00572876	0.0020595	EML2, ATAT1, MAK, IKBKG, AGBL5, PKP4, TTC28, TPR, GOLGA2	981	47	19662	3.83799	0.707938	0.0596842	2.99695
GOTERM_MF_DIRECT	GO:0051117~ATPase binding	13	0.00827488	0.00209439	ACTR3, TOR1AIP2, NR1H2, CAV1, PIH1D1, SYVN1, ANK1, HNRNPK, NSFL1C, RAC1, PDE4D, ADCY10, SNX10	916	88	17446	2.81359	0.889586	0.155914	3.2786
GOTERM_BP_DIRECT	GO:0016477~cell migration	21	0.0133671	0.0021838	CLN3, ERG, ARC, VAV3, FUT8, FSCN1, ASTN1, ABI2, CD151, CD63, SIRPA, MDK, PDPK1, SORBS2, ST14, RAC1, CDC42BPA, SH3KBP1, LAMB1, SPATA13, MYO18A	937	191	18082	2.12174	0.999566	0.47549	3.9301
GOTERM_BP_DIRECT	GO:0045893~positive regulation of transcription, DNA-templated	47	0.0299169	0.00233477	ING2, RSF1, ACVRL1, NIF3L1, BLM, ZXDC, TRIM16, TBP, MDK, SOX8, CALCOCO1, LGR4, MEN1, NR1H2, FUBP3, CDKN2A, PRMT2, TRP63, ETV1, MKL2, SOX17, RUNX1, ETV5, HNRNPAB, ATF7IP, TRP53, DVL3, ZFP423, ESRRA, TRIP4, ESRRG, EOMES, ARID1A, MED14, MECOM, STAT1, CAPN3, RNF6, NCOA6, IRF8, TGFB1I1, KAT6B, APBB1, ARAP1, NFIA, MED1, NFIB	937	576	18082	1.57464	0.999746	0.471059	4.19631
GOTERM_BP_DIRECT	GO:0006897~endocytosis	20	0.0127306	0.00270359	DNM3, CLN3, SYNRG, CAV1, ARC, RALBP1, ITSN1, CD209E, ASGR1, SYP, FNBP1, ATP9A, RAC1, RABGEF1, SH3KBP1, WIPF1, STEAP2, SNX10, AP2M1, GHR	937	181	18082	2.13235	0.999932	0.495877	4.84378
GOTERM_CC_DIRECT	GO:0031982~vesicle	18	0.0114575	0.00344295	LZTS2, TSPAN4, VTI1B, GGT1, NRXN1, KIF9, RIMS1, SLC34A3, GNB2, EPS8, SLC2A1, RABGEF1, SYBU, GNAS, GGTA1, SPP1, CIB1, AKT2	981	164	19662	2.19982	0.872417	0.0933937	4.96287
GOTERM_MF_DIRECT	GO:0004674~protein serine/threonine kinase activity	37	0.0235516	0.00360421	STK16, CDK19, STK33, ACVRL1, STK17B, MAP4K2, LATS2, DMPK, PAK6, PAK7, PDPK1, VRK1, TTBK2, SPEG, DCLK2, LMTK3, STK19, AKT2, CDC7, TNIK, SGK3, MAK, WNK2, MAPK10, CDKL3, CDKL2, PRKCD, MARK2, MAP4K4, PLK4, MAPK14, CDC42BPA, NRK, RIPK4, IKBKB, PRKD3, KALRN	916	428	17446	1.64649	0.977514	0.237431	5.57932
GOTERM_CC_DIRECT	GO:0043234~protein complex	48	0.0305534	0.00367055	CEP97, CAV1, LTBP1, XIAP, CLU, SIPA1, HK1, PEX5, HIST2H3C2, CIC, MEN1, GSTM1, SYP, TTR, PRKAR2A, RGS12, SIN3A, CEP250, TRP63, RNF168, SKIL, RUNX1, KCNQ2, AXIN2, TES, GOLGA2, TRP53, KCNMA1, CCM2, SMAD5, ERLIN1, NRXN1, CD63, CAPN3, ATXN1, HDAC5, CD36, SERPINB6A, GNB2, MAP2, RGS6, AKAP5, RGS7, CACNA1C, APBB1, AKAP2, CACNA1A, CACNA1B	981	628	19662	1.53193	0.888681	0.0949714	5.28272
GOTERM_BP_DIRECT	GO:0007626~locomotory behavior	14	0.00891141	0.00381822	OPRM1, ASTN1, PCDH15, ELAVL4, ASL, ESPN, PAK6, PAK7, APBA2, ETV5, NEGR1, CACNA1B, CDH23, GNG7	937	108	18082	2.50156	0.999999	0.594783	6.77544
GOTERM_BP_DIRECT	GO:0007623~circadian rhythm	14	0.00891141	0.00381822	KCNMA1, TRP53, DHX9, CREM, PROKR2, SIRT1, LGR4, NTRK3, PROK2, BDNF, TIMELESS, PER1, PRL, NCOR1	937	108	18082	2.50156	0.999999	0.594783	6.77544
GOTERM_CC_DIRECT	GO:0097038~perinuclear endoplasmic reticulum	5	0.00318265	0.0041084	OSBPL3, ADAM10, OSBPL6, SYT6, DST	981	14	19662	7.15815	0.914374	0.101348	5.89521
GOTERM_MF_DIRECT	GO:0005524~ATP binding	103	0.0655625	0.00422765	STK33, TARS2, FAM20B, DMPK, DHX34, EIF2B2, HFM1, MAGI3, TNIK, LIG1, SCYL3, WNK2, CDKL3, CDKL2, MARK2, CARNS1, MAP4K4, ATP9A, RIPK4, PCCB, MYO18A, KALRN, STK16, FGFR3, BLM, GNE, MAP4K2, STK17B, CTPS2, HSPA1B, EPHB4, EPHB1, VRK1, MOV10, MUSK, TTBK2, LMTK3, STK19, POLQ, RUNX1, TRP53, DHX8, DHX9, MYO1B, RYK, AK1, MYO1D, AK4, ABCG4, RAD54L, NTRK3, EPHA7, PLK4, DDX55, UBA1, ATP2A3, CDC42BPA, HSPA13, IK…	916	1507	17446	1.30174	0.988353	0.256841	6.51429
GOTERM_MF_DIRECT	GO:0008289~lipid binding	26	0.0165498	0.00427124	OSBPL5, BPIFB9A, OSBPL3, BPIFB3, OSBPL9, BPIFA1, OSBPL6, NSFL1C, PSD4, PAQR7, ERLIN1, STARD10, DBI, MARK2, FNBP1, CD36, STARD6, APOE, OSBPL1A, GOLPH3L, SNX24, APOL6, BPIFB9B, SNX10, AP2M1, APOL11B	916	270	17446	1.83404	0.988876	0.245098	6.57933
GOTERM_MF_DIRECT	GO:0030674~protein binding, bridging	10	0.00636529	0.00429839	MEN1, TNNT2, DVL3, BFAR, CAV1, ANK3, FSCN1, COL1A2, GOLGA5, CRK	916	61	17446	3.12227	0.989191	0.233802	6.61983
GOTERM_BP_DIRECT	GO:0007155~cell adhesion	40	0.0254612	0.0043005	ITGAL, SPG7, ASTN1, PCDHGC5, ITGB5, POSTN, L1CAM, MEGF10, EPHB4, EPHB1, ITGAM, CDH8, ALCAM, COL7A1, SORBS2, RAC1, COL12A1, CD6, LAMB1, NEGR1, SPP1, CIB1, CDH23, COL18A1, SELP, EGFL7, SELL, PCDH15, NRXN1, CD63, TINAGL1, SSPO, AMIGO1, VWF, CD36, PKP4, CD99L2, LAMC2, DST, SELE	937	485	18082	1.59157	1	0.614832	7.59971
GOTERM_BP_DIRECT	GO:0051491~positive regulation of filopodium assembly	7	0.0044557	0.00457945	ACTR3, DNM3, TENM1, FSCN1, BCAS3, ARAP1, ESPN	937	31	18082	4.35756	1	0.615701	8.07331
GOTERM_BP_DIRECT	GO:0007157~heterophilic cell-cell adhesion via plasma membrane cell adhesion molecules	9	0.00572876	0.00496511	AMIGO1, ALCAM, ITGAL, SELP, TENM1, L1CAM, NRXN1, CD6, SELE	937	52	18082	3.34	1	0.624485	8.72429
GOTERM_CC_DIRECT	GO:0005891~voltage-gated calcium channel complex	6	0.00381917	0.0058599	CACNB1, CACNA1G, PDE4D, CACNA1C, CACNA1A, CACNA1B	981	24	19662	5.0107	0.970063	0.13601	8.30858
GOTERM_BP_DIRECT	GO:0001525~angiogenesis	23	0.0146402	0.00651451	COL18A1, CAV1, VAV3, ACVRL1, EGFL7, TBX4, SMAD5, NRXN1, ESM1, ARHGAP24, EPHB4, SIRT1, EPHB1, WARS, PROK2, PLXDC1, MAPK14, ROBO4, TGFA, SOX17, BCAS3, MED1, CIB1	937	239	18082	1.85711	1	0.704301	11.296
GOTERM_MF_DIRECT	GO:0033691~sialic acid binding	4	0.00254612	0.00660125	SIGLECH, SELP, L1CAM, SELE	916	8	17446	9.52293	0.999052	0.320717	9.99518
GOTERM_BP_DIRECT	GO:0006974~cellular response to DNA damage stimulus	35	0.0222785	0.00673839	MORF4L1, CLSPN, APEX2, BLM, RAD23A, INTS3, PTTG1, ZBTB38, MEN1, MCM7, ASH2L, RNF168, POLQ, APEX1, RTEL1, CIB1, TRP53, PGAP2, VAV3, MSH2, LIG1, SIRT4, APTX, SIRT1, RAD54L, SPDYA, EYA3, UHRF1, TIMELESS, UBA1, MAPK14, SPATA18, IKBKG, NCOA6, APBB1	937	420	18082	1.60815	1	0.698024	11.6619
GOTERM_BP_DIRECT	GO:0007159~leukocyte cell-cell adhesion	6	0.00381917	0.00686336	ITGAL, SELP, L1CAM, CCL5, SELE, ITGAM	937	24	18082	4.82444	1	0.687018	11.8655
GOTERM_BP_DIRECT	GO:0046329~negative regulation of JNK cascade	6	0.00381917	0.00686336	MEN1, DUSP3, PER1, MECOM, NCOR1, GPS2	937	24	18082	4.82444	1	0.687018	11.8655
GOTERM_MF_DIRECT	GO:0008134~transcription factor binding	30	0.0190959	0.00754807	CAMTA2, NIF3L1, TBP, SOX8, TRIM11, MED12L, SIN3A, CDKN2A, HNRNPK, ATG7, HNRNPF, TFDP2, PER1, SOX17, BCAS3, BCOR, ARHGEF10L, TRP53, UBE2I, SIRT1, PARK7, HDAC5, MLX, ATF7, KAT6B, APBB1, ARAP1, NFIA, ADD1, MED1	916	342	17446	1.67069	0.999652	0.342369	11.3495
GOTERM_MF_DIRECT	GO:0019901~protein kinase binding	36	0.022915	0.00774954	CAV1, ACVRL1, CACUL1, RIMS1, CCNE2, GSTM1, PDPK1, MUSK, VRK1, CDKN2A, CEP250, STX17, RAC1, CD6, AXIN2, GHR, GOLGA2, CIB1, PTPRJ, TRP53, ADAM10, MSH2, PRKCD, HDAC5, SPDYA, RPS18, RGS20, DUSP3, PIH1D1, CCND3, TOM1L2, AKAP5, LIME1, PLA2G6, HSPB1, IKBKB	916	434	17446	1.57984	0.999719	0.335569	11.6352
GOTERM_BP_DIRECT	GO:1901215~negative regulation of neuron death	9	0.00572876	0.00781998	BDNF, NOS1AP, APOE, CCL5, MDK, SIRT1, GH, PARK7, GHR	937	56	18082	3.10143	1	0.717469	13.4095
GOTERM_BP_DIRECT	GO:0045944~positive regulation of transcription from RNA polymerase II promoter	70	0.044557	0.00803135	ACVRL1, FLCN, ZBTB38, EPCAM, MEN1, GABPB1, HSPH1, FUBP3, CDKN2A, SIN3A, ASH2L, TRP63, POU4F1, SOX17, MKL2, GABPB2, AKT2, RELB, ZFP467, EOMES, MED14, LPIN2, MECOM, MTF2, NCOA6, MED1, STK16, KMT2D, CAMTA2, CCL3, PUS1, CREM, IL33, POMC, SOX8, CALCOCO1, NR1H2, SLC11A1, RGMA, HNRNPK, NFAT5, PER1, ETV1, BCAS3, RUNX1, ETV5, TRP53, TBX6, ESRRA, SMAD5, ARID3A, ESRRG, TEAD1, ABHD14B, ZFP148, STAT1, SIRT1, …	937	995	18082	1.35763	1	0.711142	13.7472
GOTERM_CC_DIRECT	GO:0000118~histone deacetylase complex	7	0.0044557	0.00815339	HDAC5, HR, PHF21A, ZFP217, MECOM, NCOR1, ARHGEF10L	981	36	19662	3.89721	0.99246	0.177577	11.3815
GOTERM_BP_DIRECT	GO:0051017~actin filament bundle assembly	7	0.0044557	0.00847154	EPS8, MYO1B, FSCN1, PCDH15, PLS3, ADD1, ESPN	937	35	18082	3.85955	1	0.715091	14.4464
GOTERM_CC_DIRECT	GO:0016363~nuclear matrix	12	0.00763835	0.00885172	MEN1, ATXN1, TRP53, HNRNPM, UHRF1, PHACTR3, BLM, TENM1, SRRM1, NSMF, TGFB1I1, PRKCD	981	97	19662	2.47952	0.995048	0.184663	12.298
GOTERM_MF_DIRECT	GO:0003712~transcription cofactor activity	9	0.00572876	0.00936987	RALY, ZFP710, NMI, TFDP2, PHF21A, MED14, TRRAP, CALCOCO1, MED1	916	57	17446	3.00724	0.99995	0.375716	13.9018
GOTERM_MF_DIRECT	GO:0051015~actin filament binding	15	0.00954794	0.00943113	TRIOBP, MYL4, MYO1B, FSCN1, MYO1D, FLNC, ESPN, ACTR3, LASP1, VPS16, WIPF1, MYO18A, DBN1, PLS3, ADD1	916	132	17446	2.1643	0.999953	0.364084	13.9864
GOTERM_BP_DIRECT	GO:0022604~regulation of cell morphogenesis	6	0.00381917	0.00975261	FMNL2, ARC, ZMYM3, ZMYM6, CAMSAP1, RAC1	937	26	18082	4.45333	1	0.750559	16.4511
GOTERM_CC_DIRECT	GO:0000790~nuclear chromatin	21	0.0133671	0.0103421	TRP53, DVL3, PUS1, TTC21B, SCML2, APTX, ARID1A, TBP, STAT1, EHMT2, SIRT1, CALCOCO1, HIST2H2AA1, MEN1, HDAC5, UHRF1, HNRNPK, TIMELESS, TRP63, POU4F1, NCOR1	981	228	19662	1.84605	0.997984	0.20536	14.2244
GOTERM_CC_DIRECT	GO:0005834~heterotrimeric G-protein complex	7	0.0044557	0.0106241	GNB2, RGS6, RGS7, GNAS, GNG12, GNAT2, GNG7	981	38	19662	3.6921	0.998299	0.203663	14.5843
GOTERM_MF_DIRECT	GO:0015631~tubulin binding	8	0.00509223	0.0107153	EML2, AGBL1, AGTPBP1, AGBL4, AGBL5, MAP2, STMN1, TPR	916	47	17446	3.24185	0.999988	0.388771	15.7423
GOTERM_CC_DIRECT	GO:0030054~cell junction	51	0.032463	0.0109794	SYT1, OCLN, GLRA1, CRIPT, SYT2, SYT6, ITSN1, RIMS1, FBF1, ESPN, SYP, EPCAM, MFF, MUSK, PDPK1, ATAT1, RGS12, HNRNPK, SORBS2, ANK3, LRFN1, TMUB1, UNC5C, TES, SYNPO, PTPRJ, ANKS1B, MAGI3, GJD4, ARC, C4B, FSCN1, NRXN1, ARHGAP24, LDLRAD3, FMN1, IGSF5, SLC17A5, EPS8, DRP2, PLXDC1, PKP4, CD99L2, SH3KBP1, NSMF, TGFB1I1, UNC13C, DBN1, DST, NFIA, MPST	981	718	19662	1.42365	0.998627	0.203297	15.0359
GOTERM_MF_DIRECT	GO:0005096~GTPase activator activity	22	0.0140036	0.0122053	ABR, RAP1GAP, RALBP1, SIPA1, SIPA1L3, ARHGEF15, ARHGAP24, NPRL3, ARHGAP25, RASAL1, HMHA1, TBC1D24, RGS20, ARHGAP20, RGS12, TIAM2, RASAL3, RGS6, RGS7, AXIN2, ARAP1, ARHGEF10L	916	235	17446	1.78302	0.999998	0.415955	17.7376
GOTERM_BP_DIRECT	GO:0060765~regulation of androgen receptor signaling pathway	4	0.00254612	0.0126162	RNF6, PRMT2, PARK7, SAFB2	937	10	18082	7.7191	1	0.822653	20.7727
GOTERM_MF_DIRECT	GO:1990380~Lys48-specific deubiquitinase activity	4	0.00254612	0.0130739	USP19, OTUD5, OTUD7B, FAM188A	916	10	17446	7.61834	0.999999	0.424923	18.8803
GOTERM_BP_DIRECT	GO:0007269~neurotransmitter secretion	6	0.00381917	0.0133822	SYT1, PPFIA3, SYT2, NRXN1, RIMS1, CACNA1B	937	28	18082	4.13523	1	0.829224	21.8924
GOTERM_MF_DIRECT	GO:0003713~transcription coactivator activity	18	0.0114575	0.0137991	DCC, TRIP4, MAK, SUB1, MED14, PMF1, TRRAP, LPIN2, TAF6L, CALCOCO1, PARK7, PRMT2, NCOA6, TGFB1I1, MKL2, SOX17, APEX1, MED1	916	180	17446	1.90459	1	0.429752	19.8228
GOTERM_BP_DIRECT	GO:1903861~positive regulation of dendrite extension	5	0.00318265	0.014827	SYT1, RASAL1, HNRNPK, SYT2, RIMS1	937	19	18082	5.07836	1	0.848876	23.9636
GOTERM_BP_DIRECT	GO:2000619~negative regulation of histone H4-K16 acetylation	3	0.00190959	0.014976	PIH1D1, ATG7, SIRT1	937	4	18082	14.4733	1	0.841655	24.1744
GOTERM_BP_DIRECT	GO:0035609~C-terminal protein deglutamylation	3	0.00190959	0.014976	AGBL1, AGTPBP1, AGBL4	937	4	18082	14.4733	1	0.841655	24.1744
GOTERM_BP_DIRECT	GO:0042133~neurotransmitter metabolic process	3	0.00190959	0.014976	CLN3, AGTPBP1, CACNA1A	937	4	18082	14.4733	1	0.841655	24.1744
GOTERM_BP_DIRECT	GO:0001934~positive regulation of protein phosphorylation	18	0.0114575	0.0150008	DVL3, CLN3, TNIK, OPRL1, FLCN, SIRT1, RGMA, EPHA7, MUSK, CCND3, RAC1, AKAP5, PLA2G6, GNAS, AXIN2, CD6, AKT2, CIB1	937	184	18082	1.88782	1	0.83212	24.2093
GOTERM_MF_DIRECT	GO:0005089~Rho guanyl-nucleotide exchange factor activity	10	0.00636529	0.0150112	ABR, PLEKHG1, VAV3, TIAM2, ARHGEF9, ARHGEF15, ITSN1, SPATA13, ARHGEF10L, KALRN	916	74	17446	2.57376	1	0.444983	21.3754
GOTERM_CC_DIRECT	GO:0005801~cis-Golgi network	7	0.0044557	0.0152589	NUCB1, SLC35C2, TRPC7, PHTF1, GOLGA5, KDELR1, GOLGA2	981	41	19662	3.42194	0.999897	0.263608	20.3034
GOTERM_BP_DIRECT	GO:0048511~rhythmic process	14	0.00891141	0.0153363	TRP53, DHX9, CREM, RELB, CBX3, MAPK10, U2AF1L4, SIRT1, LGR4, SUV39H2, PROK2, SIN3A, TIMELESS, PER1	937	128	18082	2.11069	1	0.828963	24.6814
GOTERM_MF_DIRECT	GO:0005042~netrin receptor activity	3	0.00190959	0.0153594	DCC, UNC5A, UNC5C	916	4	17446	14.2844	1	0.44066	21.8161
GOTERM_BP_DIRECT	GO:0043065~positive regulation of apoptotic process	28	0.0178228	0.0153922	STEAP3, CDK19, ING2, CLU, PDCD1, LATS2, SHQ1, MEN1, BDNF, CDKN2A, PRMT2, MTCH2, ATG7, POU4F1, INPP5D, UNC5C, ADCY10, KCNMA1, TRP53, MUC2, SIRT1, PRKCD, NTRK3, EPHA7, IRF5, BNIP3L, APBB1, ALOX12	937	335	18082	1.61295	1	0.82039	24.7597
GOTERM_BP_DIRECT	GO:0006302~double-strand break repair	9	0.00572876	0.0155542	EYA3, TRP53, MSH2, LIG1, TDP1, RNF168, POLQ, RAD54L, APBB1	937	63	18082	2.75682	1	0.814112	24.9865
GOTERM_MF_DIRECT	GO:0016874~ligase activity	30	0.0190959	0.0156606	SYVN1, HECW2, TARS2, XIAP, CTPS2, TTC3, LNX1, TRIM11, TTLL11, WARS, G2E3, HECTD2, RNF168, TRAF7, UNKL, LRSAM1, LIG1, UBE2I, BRAP, CARNS1, RFWD2, MIB1, RNF6, UHRF1, UBA1, SH3RF2, FARSA, NEURL3, PCCB, RNF41	916	362	17446	1.57839	1	0.435634	22.1956
GOTERM_BP_DIRECT	GO:0060013~righting reflex	4	0.00254612	0.0166886	GLRA1, PCDH15, CDH23, FOXP2	937	11	18082	7.01737	1	0.826786	26.556
GOTERM_BP_DIRECT	GO:0090161~Golgi ribbon formation	4	0.00254612	0.0166886	STX16, MYO18A, GCC2, GOLGA2	937	11	18082	7.01737	1	0.826786	26.556
GOTERM_BP_DIRECT	GO:0006397~mRNA processing	27	0.0171863	0.0168283	RALY, RNMT, HNRNPA3, HNRNPM, HNRNPK, TARDBP, HNRNPF, SRRM1, PTBP3, GEMIN7, TSEN34, DHX8, ADARB1, CSTF2, ADARB2, GRSF1, SF1, MBNL1, PRPF18, U2AF1L4, PPIH, ESRP1, CELF2, CPSF6, LSM10, SNRNP25, ADAR	937	322	18082	1.61814	1	0.820489	26.7471
GOTERM_BP_DIRECT	GO:0007268~chemical synaptic transmission	17	0.010821	0.0169027	KCNMA1, OPRM1, SLC12A6, GLRA1, OPRL1, CACNB1, TAC1, NRXN1, CDH8, SYP, SSTR1, CACNA1G, APBA2, CACNA1C, UNC13C, HTR1D, CACNA1A	937	172	18082	1.90734	1	0.813114	26.8487
GOTERM_MF_DIRECT	GO:0005085~guanyl-nucleotide exchange factor activity	16	0.0101845	0.0171788	RALGPS2, ABR, VAV3, RPGR, PSD4, ARHGEF15, ARHGEF9, ITSN1, FLCN, SH2D3C, TIAM2, RAPGEF6, EIF2B2, SPATA13, ARHGEF10L, KALRN	916	156	17446	1.95342	1	0.455049	24.0818
GOTERM_MF_DIRECT	GO:0008331~high voltage-gated calcium channel activity	4	0.00254612	0.0172853	CACNB1, CACNA1C, CACNA1A, CACNA1B	916	11	17446	6.92576	1	0.44631	24.2125
GOTERM_MF_DIRECT	GO:0061630~ubiquitin protein ligase activity	19	0.0120941	0.0172868	LRSAM1, SYVN1, CACUL1, XIAP, UBE2G2, BRAP, TRIM11, RFWD2, 6330408A02RIK, BFAR, G2E3, RNF6, UHRF1, CUL5, FBXO30, RABGEF1, NEURL3, RNF41, MED1	916	199	17446	1.81845	1	0.436015	24.2144
GOTERM_BP_DIRECT	GO:0035023~regulation of Rho protein signal transduction	10	0.00636529	0.0176887	ABR, PLEKHG1, VAV3, TIAM2, ARHGEF9, ARHGEF15, ITSN1, SPATA13, ARHGEF10L, KALRN	937	77	18082	2.5062	1	0.81886	27.9139
GOTERM_BP_DIRECT	GO:2001244~positive regulation of intrinsic apoptotic signaling pathway	6	0.00381917	0.0178258	TRP53, DFNA5, CAV1, S100A9, CLU, FLCN	937	30	18082	3.85955	1	0.81298	28.0982
GOTERM_BP_DIRECT	GO:0051262~protein tetramerization	7	0.0044557	0.0180684	TRP53, SBF2, HMGCR, TRP63, CPSF6, CCL5, ASL	937	41	18082	3.29474	1	0.809097	28.4233
GOTERM_CC_DIRECT	GO:0070062~extracellular exosome	157	0.0999351	0.0184702	FHIT, ALAD, NIT1, SLC22A13, CROCC, S100A9, GGT1, ALDH1L2, SIDT2, CD209E, HIST2H2AA1, TTR, PRKAR2A, NUDCD2, TIAM2, APOE, SLC2A1, ROBO4, CFH, COL12A1, DDAH2, NEGR1, HIST1H2BQ, CIB1, NQO2, GNG7, PTPRJ, BSG, NUDT1, TNIK, C4B, CHTF8, NPEPPS, PIK3IP1, TAF6L, SIRPA, CFAP70, RPS18, NAPEPLD, ST14, COL1A2, HSPB1, STMN1, KALRN, MPST, ITGAL, CLU, ITGB5, GSTCD, CTSA, ASL, EPHB4, EPHB1, ITGAM, TIMP1, ALCAM, HN…	981	2674	19662	1.17678	0.999985	0.301644	24.0544
GOTERM_MF_DIRECT	GO:0042802~identical protein binding	46	0.0292803	0.0191604	FHIT, SCHIP1, ALAD, CAV1, ALDH18A1, SNCAIP, XIAP, NIF3L1, UBE2G2, CBX3, L1CAM, AMOTL2, CCL4, SYP, TTR, APOE, TARDBP, SLC2A1, TRP63, BRI3, MYOM1, PHC2, DHX8, TRP53, MOCS2, CREBZF, SCUBE2, KCTD20, STAT1, SIRT1, PARK7, BRAP, GCC2, SAFB2, ATXN1, VWF, UHRF1, PLK4, FNBP1, BNIP3L, CDC42BPA, COL1A2, HSPB1, INS2, LUC7L, MPST	916	625	17446	1.40177	1	0.459981	26.4793
GOTERM_BP_DIRECT	GO:0043547~positive regulation of GTPase activity	15	0.00954794	0.0192891	DVL3, CCL3, RAP1GAP, RALBP1, CCL5, CCL4, RGMA, PKP4, RGS6, RAPGEF6, RGS7, GNAS, BCAS3, ARAP1, KALRN	937	146	18082	1.98265	1	0.82178	30.0376
GOTERM_BP_DIRECT	GO:0007628~adult walking behavior	7	0.0044557	0.020185	KCNMA1, GLRA1, AGTPBP1, ATG7, PCDH15, CACNA1C, CACNA1A	937	42	18082	3.21629	1	0.828235	31.2006
GOTERM_CC_DIRECT	GO:0045202~synapse	37	0.0235516	0.0202803	SYT1, GLRA1, CRIPT, SYT2, SYT6, ITSN1, RIMS1, SYP, MFF, SHISA7, MUSK, RGS12, ANK3, DTNB, LRFN1, TMUB1, UNC5C, CDH23, SYNPO, ANKS1B, DNM3, ARC, C4B, DLGAP4, UBE2I, PCDH15, NRXN1, SLC17A5, EPS8, DRP2, SH3KBP1, HSPB1, NSMF, UNC13C, APBB1, ADD1, MPST	981	505	19662	1.46848	0.999995	0.317671	26.0954
GOTERM_BP_DIRECT	GO:0031663~lipopolysaccharide-mediated signaling pathway	6	0.00381917	0.0203732	CCL3, MAPK14, CCL5, STAT1, TREM2, CD6	937	31	18082	3.73505	1	0.823755	31.4425
GOTERM_BP_DIRECT	GO:2000379~positive regulation of reactive oxygen species metabolic process	6	0.00381917	0.0203732	TRP53, CD36, AKR1C18, MAPK14, NQO2, RNF41	937	31	18082	3.73505	1	0.823755	31.4425
GOTERM_BP_DIRECT	GO:0042771~intrinsic apoptotic signaling pathway in response to DNA damage by p53 class mediator	6	0.00381917	0.0203732	TRP53, PGAP2, MSH2, CDIP1, TRP63, SIRT1	937	31	18082	3.73505	1	0.823755	31.4425
GOTERM_BP_DIRECT	GO:0018105~peptidyl-serine phosphorylation	14	0.00891141	0.0204776	CDC7, CLSPN, SGK3, HK1, PRKCD, LATS2, DMPK, VRK1, PDPK1, TTBK2, MAPK14, DCLK2, PRKD3, AKT2	937	133	18082	2.03134	1	0.818099	31.5763
GOTERM_BP_DIRECT	GO:0007283~spermatogenesis	32	0.0203689	0.0206708	ING2, CREM, ADCYAP1R1, TBP, GGT1, SOX8, LGR4, DAZAP1, ATAT1, CYP26B1, TRP63, SLC4A2, SOX17, SKIL, 4932438A13RIK, ADCY10, GAL3ST1, HFM1, CIB1, PHC2, TLE3, PARP11, C330027C09RIK, RHBDD1, SIRT1, MICALCL, PROK2, SYCP3, SSTR1, SPATA18, TSGA10, GGNBP1	937	407	18082	1.51727	1	0.813894	31.8234
GOTERM_MF_DIRECT	GO:0003682~chromatin binding	36	0.022915	0.0210105	MORF4L1, CAMTA2, ING2, HIST2H3C2, TRRAP, CIC, CALCOCO1, MEN1, SIN3A, TRP63, RNF168, POU4F1, SKIL, WDHD1, TPR, BCAS3, POLQ, STAG2, STAG1, TRP53, ERG, RELB, EOMES, ARID3A, APTX, SUV39H2, HDAC5, EYA3, ATXN1, NCOA6, PHF21A, NELFE, APBB1, NCOR1, NFIA, MED1	916	466	17446	1.47135	1	0.481281	28.6537
GOTERM_BP_DIRECT	GO:0043922~negative regulation by host of viral transcription	4	0.00254612	0.021409	CCL3, TARDBP, CCL5, CCL4	937	12	18082	6.43259	1	0.817941	32.7598
GOTERM_MF_DIRECT	GO:0001540~beta-amyloid binding	6	0.00381917	0.0214312	APOE, BACE1, APBA2, LDLRAD3, ITM2C, APBB1	916	31	17446	3.68629	1	0.478238	29.1395
GOTERM_MF_DIRECT	GO:0004714~transmembrane receptor protein tyrosine kinase activity	8	0.00509223	0.0220404	NTRK3, DDR1, EPHA7, MUSK, FGFR3, RYK, EPHB4, EPHB1	916	54	17446	2.82161	1	0.478296	29.8377
GOTERM_MF_DIRECT	GO:0004842~ubiquitin-protein transferase activity	27	0.0171863	0.0223409	HECW2, XIAP, UBE2G2, TTC3, LNX1, TRIM11, G2E3, RNF141, KLHL26, HECTD2, RNF11, RNF168, PEX12, TRAF7, BCOR, UNKL, LRSAM1, GAN, UBE2I, BRAP, MIB1, RNF6, UHRF1, RNF208, UBA1, FBXO30, RNF41	916	326	17446	1.57742	1	0.473655	30.1797
GOTERM_BP_DIRECT	GO:0007411~axon guidance	15	0.00954794	0.0225798	DCC, RYK, L1CAM, TTC8, EPHB1, ALCAM, BDNF, UNC5A, ZFP280C, ANK3, RAC1, ETV1, UNC5C, LAMB1, APBB1	937	149	18082	1.94273	1	0.82771	34.22
GOTERM_CC_DIRECT	GO:0005814~centriole	12	0.00763835	0.0225959	CCHCR1, PLK4, CEP250, TTBK2, NIN, CROCC, AGBL4, CCDC151, LRRCC1, NEURL4, TTC8, FBF1	981	111	19662	2.16679	0.999999	0.338649	28.6321
GOTERM_BP_DIRECT	GO:0051592~response to calcium ion	9	0.00572876	0.0237294	KCNMA1, TNNT2, SYT1, CAV1, S100A16, PDE1C, PCDH15, TSHB, CAPN3	937	68	18082	2.55412	1	0.836321	35.6245
GOTERM_BP_DIRECT	GO:0033564~anterior/posterior axon guidance	3	0.00190959	0.0241081	DCC, UNC5A, UNC5C	937	5	18082	11.5787	1	0.834828	36.0809
GOTERM_BP_DIRECT	GO:0045541~negative regulation of cholesterol biosynthetic process	3	0.00190959	0.0241081	APOE, ERLIN1, IDI2	937	5	18082	11.5787	1	0.834828	36.0809
GOTERM_BP_DIRECT	GO:0035610~protein side chain deglutamylation	3	0.00190959	0.0241081	AGBL1, AGTPBP1, AGBL4	937	5	18082	11.5787	1	0.834828	36.0809
GOTERM_CC_DIRECT	GO:0016580~Sin3 complex	4	0.00254612	0.0242602	MORF4L1, ING2, SIN3A, NCOR1	981	13	19662	6.16702	1	0.350293	30.4048
GOTERM_CC_DIRECT	GO:0005798~Golgi-associated vesicle	4	0.00254612	0.0242602	STK16, NUCB1, ADAM10, AP1G2	981	13	19662	6.16702	1	0.350293	30.4048
GOTERM_BP_DIRECT	GO:0000165~MAPK cascade	9	0.00572876	0.0256687	MEN1, SLC11A1, CAV1, CCL3, FGFR3, INS2, CCL5, BRAP, RHBDD3	937	69	18082	2.5171	1	0.847365	37.9297
GOTERM_BP_DIRECT	GO:0043523~regulation of neuron apoptotic process	6	0.00381917	0.0261538	TRP53, GPX1, BDNF, TRP63, NSMF, PARK7	937	33	18082	3.50868	1	0.847012	38.4941
GOTERM_MF_DIRECT	GO:0008022~protein C-terminus binding	19	0.0120941	0.0268291	OPRM1, TRP53, SYT1, OPRL1, MSH2, SIPA1, LMO7, PEX5, UBE2I, SIRT1, CALCOCO1, ATXN1, EML2, ATXN2, CEP250, MAPK14, PEX12, CACNA1B, CIB1	916	209	17446	1.73144	1	0.528659	35.1054
GOTERM_BP_DIRECT	GO:0007015~actin filament organization	10	0.00636529	0.0274721	ACTR3, MYO1B, SORBS2, FSCN1, RAC1, PCDH15, LMOD2, SIRPA, AKAP2, DBN1	937	83	18082	2.32503	1	0.855527	40.0033
GOTERM_MF_DIRECT	GO:0048306~calcium-dependent protein binding	9	0.00572876	0.0274726	CLN3, SYT1, HNRNPM, SELP, MYO1D, S100PBP, NSMF, SYT6, NRXN1	916	69	17446	2.48424	1	0.52797	35.7844
GOTERM_MF_DIRECT	GO:0018024~histone-lysine N-methyltransferase activity	6	0.00381917	0.0274823	MEN1, KMT2D, EHMT1, SETD1B, EHMT2, SUV39H2	916	33	17446	3.46288	1	0.519152	35.7945
GOTERM_CC_DIRECT	GO:0005938~cell cortex	14	0.00891141	0.0278952	FNBP1, RGS20, CAV1, HNRNPK, MACF1, EPS8, RASAL3, LAMC2, ARHGEF9, AXIN2, DBN1, DST, ITPR2, AKT2	981	144	19662	1.94861	1	0.382808	34.1348
GOTERM_BP_DIRECT	GO:0046777~protein autophosphorylation	17	0.010821	0.0283393	STK16, STK33, TNIK, FGFR3, MAK, STK17B, HK1, WNK2, EPHB4, PRKCD, EPHB1, MARK2, NTRK3, DDR1, VRK1, MUSK, MAPK14	937	183	18082	1.79269	1	0.858891	40.9769
GOTERM_BP_DIRECT	GO:0045070~positive regulation of viral genome replication	5	0.00318265	0.0287744	PPIH, ADARB1, RAD23A, STAU1, ADAR	937	23	18082	4.19516	1	0.857898	41.4598
GOTERM_MF_DIRECT	GO:0004702~receptor signaling protein serine/threonine kinase activity	8	0.00509223	0.0287807	PAK6, MAP4K4, PAK7, TNIK, ACVRL1, MAP4K2, NRK, IKBKB	916	57	17446	2.6731	1	0.526969	37.144
GOTERM_CC_DIRECT	GO:0031985~Golgi cisterna	4	0.00254612	0.0297562	STX16, GOLPH3L, GOLGA5, GGTA1	981	14	19662	5.72652	1	0.394044	35.9715
GOTERM_CC_DIRECT	GO:0055037~recycling endosome	12	0.00763835	0.0300886	TNIK, ATG9A, NISCH, SGK3, FCGR2B, ATP9A, RABGEF1, RNF11, TMUB1, VTI1B, VPS16, AMOTL2	981	116	19662	2.07339	1	0.38917	36.2944
GOTERM_MF_DIRECT	GO:0015485~cholesterol binding	6	0.00381917	0.0308754	SYP, OSBPL5, OSBPL3, STARD6, APOE, ERLIN1	916	34	17446	3.36103	1	0.543789	39.2652
GOTERM_CC_DIRECT	GO:0043198~dendritic shaft	8	0.00509223	0.0314495	CRIPT, MAP2, AKAP5, GRIP2, CACNA1C, DBN1, STAU2, CACNA1B	981	61	19662	2.62857	1	0.394696	37.6011
GOTERM_BP_DIRECT	GO:0034968~histone lysine methylation	4	0.00254612	0.0328019	MEN1, EHMT1, EHMT2, SUV39H2	937	14	18082	5.51365	1	0.887819	45.7553
GOTERM_BP_DIRECT	GO:0009617~response to bacterium	6	0.00381917	0.0328866	SLC11A1, CAV1, FCGR2B, IRF8, STAT1, MECOM	937	35	18082	3.30819	1	0.883923	45.8423
GOTERM_BP_DIRECT	GO:0050850~positive regulation of calcium-mediated signaling	5	0.00318265	0.0331566	ITGAL, CCL3, L1CAM, TREM2, CCL4	937	24	18082	4.02037	1	0.881485	46.119
GOTERM_BP_DIRECT	GO:0034614~cellular response to reactive oxygen species	5	0.00318265	0.0331566	TRP53, AKR1C18, ATG7, MPV17, PARK7	937	24	18082	4.02037	1	0.881485	46.119
GOTERM_MF_DIRECT	GO:0003700~transcription factor activity, sequence-specific DNA binding	60	0.0381917	0.033205	POU6F2, ZXDC, TBP, ZKSCAN2, ZKSCAN5, ZBTB38, ZGPAT, SIN3A, CDKN2A, HOMEZ, TRP63, POU4F1, MKL2, SOX17, RELB, EOMES, FOXJ3, MECOM, FOXR2, FOXG1, ST18, PRDM1, CREM, SOX8, NR1H2, PGBD1, ZSCAN22, TFDP2, NFAT5, ETV1, RUNX1, ETV5, ZSCAN29, HNRNPAB, TRP53, TBX6, ESRRA, ERG, CREBZF, RFX5, ZFP600, TBX4, SMAD5, ARID3A, ESRRG, TEAD1, ZFP148, STAT1, FOXP2, IRF5, ZFP182, MLX, ATF7, IRF8, ZFP532, ZFP189, NCOR1,…	916	883	17446	1.29417	1	0.561928	41.5454
GOTERM_BP_DIRECT	GO:0006396~RNA processing	9	0.00572876	0.0345278	DHX9, ADARB1, HNRNPK, ADARB2, TRMT2A, GRSF1, DHX34, WDHD1, ADAR	937	73	18082	2.37918	1	0.887352	47.5033
GOTERM_MF_DIRECT	GO:0035257~nuclear hormone receptor binding	5	0.00318265	0.0345603	STAT1, BCAS3, NCOR1, SIRT1, MED1	916	24	17446	3.96789	1	0.568342	42.8347
GOTERM_BP_DIRECT	GO:0007567~parturition	3	0.00190959	0.0349333	AKR1C18, NRK, PRL	937	6	18082	9.64888	1	0.885993	47.9063
GOTERM_BP_DIRECT	GO:2000503~positive regulation of natural killer cell chemotaxis	3	0.00190959	0.0349333	CCL3, CCL5, CCL4	937	6	18082	9.64888	1	0.885993	47.9063
GOTERM_MF_DIRECT	GO:0016151~nickel cation binding	3	0.00190959	0.0357946	GSTM1, FHIT, SLC24A2	916	6	17446	9.52293	1	0.573154	43.9858
GOTERM_MF_DIRECT	GO:0016004~phospholipase activator activity	3	0.00190959	0.0357946	CCL3, PDPK1, CCL5	916	6	17446	9.52293	1	0.573154	43.9858
GOTERM_MF_DIRECT	GO:0046974~histone methyltransferase activity (H3-K9 specific)	3	0.00190959	0.0357946	EHMT1, EHMT2, SUV39H2	916	6	17446	9.52293	1	0.573154	43.9858
GOTERM_BP_DIRECT	GO:0098609~cell-cell adhesion	17	0.010821	0.0366002	FMNL2, BSG, MYO1B, FSCN1, PI4KA, HIST2H3C2, STAT1, MARK2, EPCAM, PAK6, ATXN2L, LASP1, MKL2, EEF1D, TES, GOLGA2, ADD1	937	189	18082	1.73578	1	0.893379	49.5319
GOTERM_MF_DIRECT	GO:0044822~poly(A) RNA binding	73	0.0464666	0.0371396	RALY, METAP2, TRMT2A, SRP68, TRMT1, FUBP3, CDKN2A, PCBP4, TARDBP, DHX34, SRRM1, PTBP3, TPR, RPGR, NIP7, SF1, KTN1, UBE2I, MBNL1, MARK2, RPS18, EIF4A2, EIF2S2, HSPB1, CELF2, CPSF6, FARSA, MYO18A, ADD1, TOP3B, ALDH18A1, PUS1, RPS15A, BICC1, RIMS1, STAU2, DAZAP1, STAU1, HNRNPM, MOV10, HNRNPK, ATXN2L, MACF1, SORBS2, HNRNPF, TNPO1, APEX1, HNRNPAB, TES, RPS24, DHX8, DHX9, ADARB1, CSTF2, S100A16, ADARB2…	916	1113	17446	1.24919	1	0.57883	45.2153
GOTERM_BP_DIRECT	GO:0071560~cellular response to transforming growth factor beta stimulus	8	0.00509223	0.0374525	ACTR3, STK16, CAV1, ACVRL1, AKR1C18, POSTN, RUNX1, DBN1	937	61	18082	2.53085	1	0.89496	50.3445
GOTERM_CC_DIRECT	GO:0005903~brush border	9	0.00572876	0.0375696	ACTR3, EPS8, SLC15A1, MYO1B, FOLR1, MYO1D, MYO18A, SLC34A3, ESPN	981	77	19662	2.34267	1	0.443554	43.1741
GOTERM_BP_DIRECT	GO:0002009~morphogenesis of an epithelium	5	0.00318265	0.0379064	FGFR3, TIMELESS, TBX4, PCDH15, RIPK4	937	25	18082	3.85955	1	0.893951	50.7722
GOTERM_BP_DIRECT	GO:0048168~regulation of neuronal synaptic plasticity	5	0.00318265	0.0379064	SYP, ARC, RAC1, NSMF, KALRN	937	25	18082	3.85955	1	0.893951	50.7722
GOTERM_CC_DIRECT	GO:0031012~extracellular matrix	23	0.0146402	0.0379566	COL18A1, LTBP1, EGFL7, S100A9, CLU, RPS15A, POSTN, TINAGL1, TIMP1, VWF, HNRNPM, COL26A1, RPS18, HNRNPK, APOE, RAC1, COL1A2, COL12A1, HSPB1, ATP5A1, TGFB1I1, LAMB1, PCSK6	981	294	19662	1.56798	1	0.438719	43.5105
GOTERM_BP_DIRECT	GO:0001701~in utero embryonic development	24	0.0152767	0.0380065	TRP53, KMT2D, CCM2, SYVN1, ADAM10, ACVRL1, MSH2, MBNL1, MECOM, FLCN, SOX8, MIB1, DUSP3, SIN3A, LY6E, SPEG, EIF2S2, APBA2, PRDM1, MKL2, RUNX1, MED1, ADAR, ADD1	937	299	18082	1.54898	1	0.890695	50.866
GOTERM_BP_DIRECT	GO:0070588~calcium ion transmembrane transport	10	0.00636529	0.0381251	ATP2A3, SLC24A2, CACNG6, TRPC7, CACNB1, CACNA1G, CACNA1C, CACNA1A, CACNA1B, ITPR2	937	88	18082	2.19293	1	0.887568	50.9771
GOTERM_CC_DIRECT	GO:0016023~cytoplasmic, membrane-bounded vesicle	14	0.00891141	0.0388436	SGK3, OPRL1, ANP32E, SLC17A5, RGS20, FNBP1, BDNF, PDPK1, RAC1, WIPF1, NRSN1, TRAF7, AXIN2, DST	981	151	19662	1.85827	1	0.438352	44.2743
GOTERM_CC_DIRECT	GO:0045121~membrane raft	21	0.0133671	0.038997	OPRM1, DCC, CLN3, BSG, CAV1, ARID3A, HK1, L1CAM, NFAM1, EPHB1, PARK7, ADAM3, CD36, FCGR2B, UNC5A, BACE1, SLC2A1, GNAS, INPP5D, IKBKB, SELE	981	262	19662	1.60649	1	0.431874	44.4054
GOTERM_BP_DIRECT	GO:0006357~regulation of transcription from RNA polymerase II promoter	30	0.0190959	0.039385	ZFP710, CAMTA2, LCORL, HMGN2, TCEAL7, MED12L, NR1H2, HNRNPK, TFDP2, ETV1, POU4F1, ETV5, TRP53, ERG, TTC21B, RFX5, SUB1, SNAPC4, RELB, EOMES, MED14, EHMT2, SAFB2, IRF5, MAPK14, MLX, LIME1, GNAS, NCOR1, MED1	937	397	18082	1.45827	1	0.891802	52.1413
GOTERM_BP_DIRECT	GO:0097352~autophagosome maturation	4	0.00254612	0.0394636	CLN3, SNX14, STX17, VPS16	937	15	18082	5.14607	1	0.888535	52.2131
GOTERM_BP_DIRECT	GO:0010875~positive regulation of cholesterol efflux	4	0.00254612	0.0394636	NR1H2, APOE, SIRT1, ABCG4	937	15	18082	5.14607	1	0.888535	52.2131
GOTERM_MF_DIRECT	GO:0046966~thyroid hormone receptor binding	5	0.00318265	0.0394907	PRMT2, NCOA6, HR, NCOR1, MED1	916	25	17446	3.80917	1	0.593832	47.304
GOTERM_BP_DIRECT	GO:0007179~transforming growth factor beta receptor signaling pathway	9	0.00572876	0.0396505	TRP53, ACVRL1, LTBP1, FUT8, SMAD5, COL1A2, ITGB5, SKIL, ARAP1	937	75	18082	2.31573	1	0.885964	52.3834
GOTERM_BP_DIRECT	GO:0010628~positive regulation of gene expression	30	0.0190959	0.0417435	CAV1, CCL3, IL33, CCL5, SOX8, RIMS1, CALCOCO1, MEN1, NR1H2, SLC11A1, FUBP3, MUSK, ANK3, CYP26B1, NFAT5, POU4F1, SOX17, AKT2, TRP53, RELB, PARK7, NTRK3, LCN2, MAPK14, IKBKG, KDM4A, INS2, PRDM1, MED1, ALOX12	937	399	18082	1.45096	1	0.895041	54.2511
GOTERM_BP_DIRECT	GO:0007275~multicellular organism development	67	0.0426475	0.0419799	POU6F2, ANO1, CNOT2, L1CAM, LGR4, CCHCR1, G2E3, UNC5A, ROBO4, TRP63, POU4F1, SEMA3B, MKL2, UNC5C, AKT2, PHC2, ZFP423, ARC, EGFL7, TLE3, EOMES, UBE2I, ARHGAP24, DNASE2A, MARK2, AMIGO1, EYA3, SPDYA, 6330408A02RIK, TIMELESS, SPATA18, FOXG1, STMN1, PRDM1, DBN1, MED1, UNCX, DCC, SYVN1, TNFRSF25, FHL1, ADCYAP1R1, BEX1, PAQR7, BICC1, MDK, EPHB4, DAZAP1, MUSK, TRP53, COL18A1, TBX6, DVL3, ZMYM3, ZMYM6, TB…	937	1029	18082	1.25651	1	0.892888	54.4576
GOTERM_BP_DIRECT	GO:0007218~neuropeptide signaling pathway	9	0.00572876	0.0423922	PROK2, GLRA1, ECEL1, SSTR1, TENM1, CYSLTR2, OPRL1, TAC1, POMC	937	76	18082	2.28526	1	0.891781	54.8157
GOTERM_BP_DIRECT	GO:0045665~negative regulation of neuron differentiation	9	0.00572876	0.0423922	MIB1, CAV1, RAP1GAP, FOXG1, BEX1, APBB1, ZFP536, TTC3, MED1	937	76	18082	2.28526	1	0.891781	54.8157
GOTERM_BP_DIRECT	GO:0010765~positive regulation of sodium ion transport	5	0.00318265	0.0430252	SGK3, ANK3, GNAS, IKBKB, AKT2	937	26	18082	3.71111	1	0.891965	55.3604
GOTERM_BP_DIRECT	GO:0043488~regulation of mRNA stability	5	0.00318265	0.0430252	CALCR, PCBP4, MAPK14, ELAVL4, APEX1	937	26	18082	3.71111	1	0.891965	55.3604
GOTERM_BP_DIRECT	GO:0050905~neuromuscular process	5	0.00318265	0.0430252	ATXN2, GLRA1, AGTPBP1, PEX5, CACNA1A	937	26	18082	3.71111	1	0.891965	55.3604
GOTERM_BP_DIRECT	GO:0050772~positive regulation of axonogenesis	5	0.00318265	0.0430252	AMIGO1, SHOX2, NIN, SKIL, GOLGA2	937	26	18082	3.71111	1	0.891965	55.3604
GOTERM_CC_DIRECT	GO:0015629~actin cytoskeleton	17	0.010821	0.0441272	TRIOBP, ARC, CROCC, FSCN1, STK17B, FLNC, ESPN, TMEM63B, SLC16A3, SMTN, MACF1, WIPF1, DBN1, DST, CRK, STAG2, SYNPO	981	201	19662	1.69516	1	0.465582	48.6284
GOTERM_CC_DIRECT	GO:0005913~cell-cell adherens junction	24	0.0152767	0.0449731	FMNL2, BSG, MYO1B, FSCN1, PI4KA, LMO7, ABI2, HIST2H3C2, EIF2A, C330027C09RIK, STAT1, PARK7, MARK2, PAK6, HNRNPK, ATXN2L, LASP1, TGM1, MKL2, EEF1D, DBN1, TES, GOLGA2, ADD1	981	316	19662	1.52224	1	0.464391	49.2954
GOTERM_BP_DIRECT	GO:0042787~protein ubiquitination involved in ubiquitin-dependent protein catabolic process	13	0.00827488	0.0452586	6330408A02RIK, BFAR, UHRF1, CUL5, SYVN1, HECW2, CACUL1, HECTD2, RNF11, BTBD6, GAN, LNX1, BTBD11	937	134	18082	1.87217	1	0.90079	57.2328
GOTERM_CC_DIRECT	GO:0005813~centrosome	31	0.0197324	0.0453564	CEP97, LZTS2, CROCC, LRRCC1, TTC8, CNTRL, TTC28, FBF1, CCDC64, PRKAR2A, CEP250, IFT46, DYNLL2, AXIN2, DDAH2, APEX1, CIB1, CDH23, CEP112, DHX9, RPGR, NIN, MAK, PDE4D, MBNL1, CDKL2, RFWD2, EYA3, MIB1, PLK4, SNX10	981	435	19662	1.42834	1	0.459792	49.5948
GOTERM_BP_DIRECT	GO:1901214~regulation of neuron death	4	0.00254612	0.0467532	DCC, CLU, CCL5, EPHB1	937	16	18082	4.82444	1	0.905154	58.4441
GOTERM_BP_DIRECT	GO:0006888~ER to Golgi vesicle-mediated transport	9	0.00572876	0.0482445	SEC23A, ANK1, TRAPPC8, STX17, LMF1, VTI1B, COPE, ERGIC3, GOLGA2	937	78	18082	2.22666	1	0.90921	59.6204
GOTERM_MF_DIRECT	GO:0016279~protein-lysine N-methyltransferase activity	4	0.00254612	0.0483043	EHMT1, METTL10, EHMT2, SETD4	916	16	17446	4.76146	1	0.661781	54.4883
GOTERM_MF_DIRECT	GO:0031730~CCR5 chemokine receptor binding	3	0.00190959	0.0483956	CCL5, STAT1, CCL4	916	7	17446	8.16251	1	0.654926	54.5577
GOTERM_BP_DIRECT	GO:0016126~sterol biosynthetic process	5	0.00318265	0.0485131	TM7SF2, SC5D, CYB5R1, HMGCS2, HMGCR	937	27	18082	3.57366	1	0.907476	59.8289
GOTERM_BP_DIRECT	GO:0090314~positive regulation of protein targeting to membrane	5	0.00318265	0.0485131	ACTR3, MFF, ANK3, AKT2, CIB1	937	27	18082	3.57366	1	0.907476	59.8289
GOTERM_BP_DIRECT	GO:0006641~triglyceride metabolic process	6	0.00381917	0.049335	GPX1, CAV1, CD36, APOE, LMF1, DBI	937	39	18082	2.96889	1	0.908312	60.4605
GOTERM_BP_DIRECT	GO:0051865~protein autoubiquitination	7	0.0044557	0.0509314	BFAR, UHRF1, LRSAM1, RNF141, RNF208, RNF11, RNF41	937	52	18082	2.59778	1	0.912512	61.6607
GOTERM_MF_DIRECT	GO:0019904~protein domain specific binding	23	0.0146402	0.0514518	OPRM1, OCLN, DLGAP4, MYO1D, CBX3, SIRT1, TRIM11, SYP, HNRNPM, PRKAR2A, HNRNPK, CEP250, SORBS2, IKBKG, RGS6, AKAP5, TFDP2, TRP63, GNAS, CACNA1C, AKAP2, NCOR1, CRK	916	289	17446	1.51576	1	0.670551	56.8235
GOTERM_CC_DIRECT	GO:0005768~endosome	37	0.0235516	0.0519327	STEAP3, CAV1, AP1G2, SNX14, ADCYAP1R1, ASTN1, L1CAM, AMOTL2, EPHB1, NISCH, APOE, FOLR1, OSBPL1A, RABGEF1, TMUB1, RNF11, VPS16, LEPROT, AKT2, CLN3, ARC, WDFY1, ATG9A, TNIK, SGK3, OSBPL9, MYO1D, VTI1B, TMBIM1, CD63, ABCG4, ANKRD13B, ATP9A, BACE1, GNAS, STEAP2, SNX10	981	544	19662	1.36321	1	0.49949	54.4837
GOTERM_CC_DIRECT	GO:0015630~microtubule cytoskeleton	14	0.00891141	0.0525344	CDC7, ESRRA, FMN1, EML2, NUCB1, NUDCD2, DGCR8, TIMELESS, MACF1, CCSER2, ADCY10, AXIN2, DST, ARHGEF10L	981	158	19662	1.77595	1	0.496145	54.9082
GOTERM_BP_DIRECT	GO:0045773~positive regulation of axon extension	6	0.00381917	0.0540816	BDNF, MACF1, APOE, L1CAM, EIF2B2, DBN1	937	40	18082	2.89466	1	0.922506	63.9286
GOTERM_BP_DIRECT	GO:0006260~DNA replication	12	0.00763835	0.0541035	FHIT, SIN3A, MCM7, BLM, CHTF8, LIG1, POLD2, FAM111A, POLQ, NFIA, RTEL1, NFIB	937	123	18082	1.88271	1	0.920007	63.9439
GOTERM_BP_DIRECT	GO:0042060~wound healing	10	0.00636529	0.0542429	OPRM1, TRP53, SLC11A1, CAV1, MACF1, BC004004, TGFA, INS2, NBEAL2, TIMP1	937	94	18082	2.05295	1	0.917952	64.0412
GOTERM_BP_DIRECT	GO:0060548~negative regulation of cell death	9	0.00572876	0.0545984	NTRK3, BDNF, ADCYAP1R1, ATG7, BNIP3L, KDM4A, CCL5, SIRT1, PARK7	937	80	18082	2.171	1	0.916744	64.2883
GOTERM_BP_DIRECT	GO:0043122~regulation of I-kappaB kinase/NF-kappaB signaling	4	0.00254612	0.0546539	PDPK1, LIME1, HSPB1, CAPN3	937	17	18082	4.54065	1	0.91437	64.3267
GOTERM_BP_DIRECT	GO:0008299~isoprenoid biosynthetic process	4	0.00254612	0.0546539	HMGCS2, HMGCR, PEX5, IDI2	937	17	18082	4.54065	1	0.91437	64.3267
GOTERM_BP_DIRECT	GO:0048172~regulation of short-term neuronal synaptic plasticity	4	0.00254612	0.0546539	SYP, SHISA7, PPFIA3, BDNF	937	17	18082	4.54065	1	0.91437	64.3267
GOTERM_MF_DIRECT	GO:0001948~glycoprotein binding	9	0.00572876	0.0546639	VWF, SELP, RGMA, GFAP, FBXO27, TGFA, CTSA, CD6, ITGAM	916	79	17446	2.16978	1	0.686032	59.0905
GOTERM_BP_DIRECT	GO:0009968~negative regulation of signal transduction	7	0.0044557	0.0550315	RGS20, CAV1, RGS6, RGS7, INPP5D, BRAP, CISH	937	53	18082	2.54876	1	0.913274	64.5872
GOTERM_BP_DIRECT	GO:0007049~cell cycle	42	0.0267342	0.0556846	STEAP3, TRIOBP, CLSPN, LZTS2, APEX2, CACUL1, CROCC, LRRCC1, TTC28, CNTRL, PTTG1, LATS2, RCBTB1, CCNE2, VRK1, MCM7, CDKN2A, CEP250, TFDP2, TRP63, TPR, STAG2, GOLGA2, CIB1, STAG1, CDCA3, CDC7, TRP53, ESCO1, MSH2, LIG1, CHTF8, UBE2I, PMF1, PRKCD, SUV39H2, SPDYA, UHRF1, CCND3, TIMELESS, SYCP3, MAPRE2	937	614	18082	1.32004	1	0.913278	65.0333
GOTERM_MF_DIRECT	GO:0019905~syntaxin binding	9	0.00572876	0.058081	SYT1, CAV1, SYT2, VPS54, STX16, SYT6, UNC13C, CACNA1A, GOLGA2	916	80	17446	2.14266	1	0.701617	61.3794
GOTERM_CC_DIRECT	GO:0032580~Golgi cisterna membrane	8	0.00509223	0.0592053	NUCB1, MOB4, ST6GAL2, FUT8, GOLPH3L, ARAP1, GGTA1, GOLGA2	981	70	19662	2.29061	1	0.531896	59.3737
GOTERM_CC_DIRECT	GO:0005719~nuclear euchromatin	5	0.00318265	0.0600616	ASH2L, CBX3, NSMF, TBP, SIRT1	981	30	19662	3.34047	1	0.529833	59.916
GOTERM_CC_DIRECT	GO:0031965~nuclear membrane	18	0.0114575	0.0601775	NUDT1, OSBPL3, MRPS23, NOS1AP, OSBPL6, FAM188A, NRXN1, BRAP, STAU2, DMPK, SLC16A3, RNF6, TSGA10, HSD11B1, IL15RA, NSMF, TPR, TNPO1	981	226	19662	1.59633	1	0.523385	59.9889
GOTERM_BP_DIRECT	GO:2000480~negative regulation of cAMP-dependent protein kinase activity	3	0.00190959	0.060882	PRKAR2A, PKIG, SIRT1	937	8	18082	7.23666	1	0.929254	68.3994
GOTERM_BP_DIRECT	GO:0051013~microtubule severing	3	0.00190959	0.060882	LZTS2, KATNAL2, TTLL11	937	8	18082	7.23666	1	0.929254	68.3994
GOTERM_BP_DIRECT	GO:0032933~SREBP signaling pathway	3	0.00190959	0.060882	ERLIN1, EIF2A, ARHGEF10L	937	8	18082	7.23666	1	0.929254	68.3994
GOTERM_BP_DIRECT	GO:0033554~cellular response to stress	3	0.00190959	0.060882	OPRM1, TRP53, SPATA18	937	8	18082	7.23666	1	0.929254	68.3994
GOTERM_MF_DIRECT	GO:0098641~cadherin binding involved in cell-cell adhesion	22	0.0140036	0.0617161	FMNL2, BSG, MYO1B, FSCN1, PI4KA, HIST2H3C2, EIF2A, C330027C09RIK, STAT1, PARK7, MARK2, EPCAM, PAK6, HNRNPK, ATXN2L, LASP1, MKL2, EEF1D, DBN1, TES, GOLGA2, ADD1	916	279	17446	1.50182	1	0.717263	63.6823
GOTERM_BP_DIRECT	GO:0006816~calcium ion transport	13	0.00827488	0.0620802	CCL3, CAV1, TRPC7, CACNG6, CACNB1, CCL5, ITPR2, ATP2A3, SLC24A2, CACNA1C, CACNA1A, CDH23, CACNA1B	937	141	18082	1.77923	1	0.930797	69.1307
GOTERM_MF_DIRECT	GO:0004000~adenosine deaminase activity	3	0.00190959	0.062327	ADARB1, ADARB2, ADAR	916	8	17446	7.14219	1	0.714216	64.0565
GOTERM_BP_DIRECT	GO:0030889~negative regulation of B cell proliferation	4	0.00254612	0.0631456	CDKN2A, FCGR2B, INPP5D, PRDM1	937	18	18082	4.28839	1	0.931878	69.7675
GOTERM_BP_DIRECT	GO:0048384~retinoic acid receptor signaling pathway	4	0.00254612	0.0631456	NR1H2, CREM, CYP26B1, ESRRG	937	18	18082	4.28839	1	0.931878	69.7675
GOTERM_BP_DIRECT	GO:0042326~negative regulation of phosphorylation	4	0.00254612	0.0631456	ATXN1, GRB10, CDKN2A, SIRT1	937	18	18082	4.28839	1	0.931878	69.7675
GOTERM_BP_DIRECT	GO:0051056~regulation of small GTPase mediated signal transduction	4	0.00254612	0.0631456	RAP1GAP, SIPA1, CDC42BPA, SIPA1L3	937	18	18082	4.28839	1	0.931878	69.7675
GOTERM_CC_DIRECT	GO:0030315~T-tubule	7	0.0044557	0.0634913	PRKAR2A, NOS1AP, ANK3, CACNB1, KCNJ12, CACNA1C, CAPN3	981	57	19662	2.4614	1	0.535997	62.0214
GOTERM_CC_DIRECT	GO:0005622~intracellular	94	0.0598337	0.0636228	FHIT, GFAP, NRG3, GLRA1, SRP68, TNFSF15, PEX5, ITSN1, 1700020N01RIK, ZKSCAN5, LATS2, HMHA1, ARL11, NUDCD2, ANK1, DYNLL2, CDIP1, SLC2A1, TPR, ADCY10, GM4724, RALBP1, PI4KA, EOMES, LGALS12, VTI1B, TIFA, NFAM1, PRKCD, RHBDD3, GCC2, RPS18, CD36, COL1A2, AKAP5, HSPB1, STMN1, TGFB1I1, DBN1, SPATA13, SEC61G, PRKD3, RALGPS2, AFTPH, CAV1, CCL3, APEX2, BLM, RAB3D, MAP4K2, TRIM16, HSPA1B, CCL5, RIMS1, 20103…	981	1599	19662	1.17825	1	0.529853	62.1
GOTERM_BP_DIRECT	GO:0055072~iron ion homeostasis	6	0.00381917	0.0643399	LCN2, STEAP3, SLC11A1, ANK1, HEPH, STEAP2	937	42	18082	2.75682	1	0.933298	70.4665
GOTERM_CC_DIRECT	GO:0005901~caveola	9	0.00572876	0.0645967	KCNMA1, CLN3, CAV1, CD36, NOS1AP, ADCYAP1R1, SLC2A1, HK1, SELE	981	86	19662	2.0975	1	0.528668	62.6776
GOTERM_BP_DIRECT	GO:0030593~neutrophil chemotaxis	8	0.00509223	0.06536	CCL3, VAV3, S100A9, PDE4D, CCL5, CCL4, ITGAM, SPP1	937	69	18082	2.23742	1	0.934168	71.0515
GOTERM_CC_DIRECT	GO:0097440~apical dendrite	4	0.00254612	0.0659535	RGS12, CLU, MYO1D, NSMF	981	19	19662	4.21954	1	0.529665	63.4687
GOTERM_CC_DIRECT	GO:0030863~cortical cytoskeleton	5	0.00318265	0.0663545	ANK1, NSMF, INPP5D, SELE, TPM3	981	31	19662	3.23271	1	0.525388	63.6995
GOTERM_BP_DIRECT	GO:0001937~negative regulation of endothelial cell proliferation	5	0.00318265	0.0671662	CAV1, ACVRL1, APOE, ATP5A1, STAT1	937	30	18082	3.21629	1	0.937154	72.0605
GOTERM_MF_DIRECT	GO:0005245~voltage-gated calcium channel activity	6	0.00381917	0.0672876	OPRM1, CACNB1, CACNA1G, CACNA1C, CACNA1A, CACNA1B	916	42	17446	2.72084	1	0.735816	66.9636
GOTERM_BP_DIRECT	GO:0045785~positive regulation of cell adhesion	7	0.0044557	0.0684947	PTPRJ, SELP, VAV3, CCL5, CD63, FLCN, ALOX12	937	56	18082	2.41222	1	0.938727	72.7813
GOTERM_BP_DIRECT	GO:0009615~response to virus	9	0.00572876	0.0688438	LCN2, CREBZF, CLU, RPS15A, HSPB1, STMN1, CCL5, ISG20, ADAR	937	84	18082	2.06762	1	0.937732	72.9677
GOTERM_CC_DIRECT	GO:0042383~sarcolemma	11	0.00700182	0.0702535	OPRM1, BSG, CD36, ANK1, ANK3, GNAS, FLNC, CACNA1C, DST, ALOX12, CIB1	981	118	19662	1.8684	1	0.540015	65.8737
GOTERM_CC_DIRECT	GO:0043204~perikaryon	13	0.00827488	0.071902	AMIGO1, OPRM1, PDPK1, BDNF, GLRA1, DRP2, ASTN1, HSPB1, NSMF, MAPK10, ASL, CACNA1A, SYNPO	981	150	19662	1.73704	1	0.542292	66.7559
GOTERM_BP_DIRECT	GO:0030278~regulation of ossification	4	0.00254612	0.0722054	ESRRA, FGFR3, MAPK14, PRL	937	19	18082	4.06269	1	0.944166	74.7026
GOTERM_BP_DIRECT	GO:0042325~regulation of phosphorylation	4	0.00254612	0.0722054	MCM7, INS2, IKBKB, PRKCD	937	19	18082	4.06269	1	0.944166	74.7026
GOTERM_CC_DIRECT	GO:0002102~podosome	5	0.00318265	0.0729753	ACTR3, HNRNPK, FSCN1, KIF9, TPM3	981	32	19662	3.13169	1	0.541576	67.3189
GOTERM_MF_DIRECT	GO:0008013~beta-catenin binding	9	0.00572876	0.0730767	PTPRJ, DVL3, RGS20, PRMT2, ASH2L, SOX17, AXIN2, CALCOCO1, MED12L	916	84	17446	2.04063	1	0.759296	70.0773
GOTERM_BP_DIRECT	GO:0045739~positive regulation of DNA repair	5	0.00318265	0.0740985	EYA3, RNF168, APEX1, APBB1, SIRT1	937	31	18082	3.11254	1	0.946717	75.6327
GOTERM_BP_DIRECT	GO:0071479~cellular response to ionizing radiation	5	0.00318265	0.0740985	TRP53, BLM, MAPK14, EEF1D, SIRT1	937	31	18082	3.11254	1	0.946717	75.6327
GOTERM_BP_DIRECT	GO:0018279~protein N-linked glycosylation via asparagine	5	0.00318265	0.0740985	ST6GALNAC6, SYVN1, ST6GAL2, FUT8, UBE2G2	937	31	18082	3.11254	1	0.946717	75.6327
GOTERM_MF_DIRECT	GO:0042975~peroxisome proliferator activated receptor binding	4	0.00254612	0.0744925	PRMT2, IKBKG, NCOR1, MED1	916	19	17446	4.00965	1	0.760065	70.7958
GOTERM_MF_DIRECT	GO:0008157~protein phosphatase 1 binding	4	0.00254612	0.0744925	PHACTR3, SH3RF2, TCTEX1D4, STAU1	916	19	17446	4.00965	1	0.760065	70.7958
GOTERM_CC_DIRECT	GO:0034399~nuclear periphery	4	0.00254612	0.0748255	ATF7, MAP2, TPR, TNPO1	981	20	19662	4.00856	1	0.544772	68.2685
GOTERM_BP_DIRECT	GO:0006325~chromatin organization	6	0.00381917	0.0756116	MORF4L1, HDAC5, EHMT1, ING2, ARID1A, SIRT1	937	44	18082	2.63151	1	0.948314	76.3527
GOTERM_BP_DIRECT	GO:0007043~cell-cell junction assembly	3	0.00190959	0.0756538	FSCN1, PKP4, FLCN	937	9	18082	6.43259	1	0.946768	76.3725
GOTERM_MF_DIRECT	GO:0019899~enzyme binding	28	0.0178228	0.0756618	CDK19, CAV1, TSPAN5, PEX5, CBX3, TBP, BLZF1, OAZ1, ANK1, RAC1, SLC4A2, LAMB1, AXIN2, TRP53, MSH2, UBE2I, STAT1, CAPN3, PRKCD, SIRT1, PARK7, MAPK14, ATF7, BACE1, CYP2A5, CACNA1C, CRK, KALRN	916	384	17446	1.38876	1	0.759657	71.377
GOTERM_CC_DIRECT	GO:0005681~spliceosomal complex	12	0.00763835	0.0775584	RALY, HNRNPA3, DHX8, HNRNPM, PPIH, HNRNPK, HNRNPF, SF1, SRRM1, PRPF18, U2AF1L4, SNRNP25	981	136	19662	1.76848	1	0.55214	69.6241
GOTERM_CC_DIRECT	GO:0000151~ubiquitin ligase complex	9	0.00572876	0.079692	DCUN1D1, SYVN1, IKBKG, RNF11, RNF168, TRAF7, DCUN1D4, BRAP, MED1	981	90	19662	2.00428	1	0.556372	70.6447
GOTERM_BP_DIRECT	GO:0043967~histone H4 acetylation	5	0.00318265	0.0813773	MORF4L1, PER1, TRIM16, TRRAP, APBB1	937	32	18082	3.01527	1	0.956357	78.9163
GOTERM_BP_DIRECT	GO:0006695~cholesterol biosynthetic process	5	0.00318265	0.0813773	TM7SF2, HMGCS2, HMGCR, APOE, IDI2	937	32	18082	3.01527	1	0.956357	78.9163
GOTERM_BP_DIRECT	GO:0061003~positive regulation of dendritic spine morphogenesis	4	0.00254612	0.0818079	ACTR3, DBN1, STAU2, KALRN	937	20	18082	3.85955	1	0.95569	79.0969
GOTERM_MF_DIRECT	GO:0003676~nucleic acid binding	77	0.0490127	0.0833139	RALY, ZBTB34, ZXDC, ZKSCAN2, 1700020N01RIK, ZKSCAN5, ISG20, ZGPAT, PCBP4, TARDBP, DHX34, RBMS3, PTBP3, RTEL1, HFM1, ZBTB22, GM4724, ZFP422, ZFP423, ZBTB20, RBM41, CIZ1, RBM46, ZFP467, SF1, MECOM, RPS18, CELF5, EIF4A2, ESRP1, CELF2, CPSF6, PRDM1, MYNN, BC025920, ZFP710, DPF3, BLM, SETD1B, BICC1, 2010315B03RIK, DAZAP1, HNRNPA3, HNRNPM, HNRNPK, ZSCAN22, ZFP157, HNRNPF, RAC1, ZFP523, POLQ, ZSCAN29, H…	916	1237	17446	1.18555	1	0.787668	74.9208
GOTERM_CC_DIRECT	GO:0001917~photoreceptor inner segment	6	0.00381917	0.083412	DNM3, PHLPP2, CROCC, MAK, CDH23, GNAT2	981	47	19662	2.55866	1	0.567711	72.3481
GOTERM_MF_DIRECT	GO:0017016~Ras GTPase binding	4	0.00254612	0.0843589	RASSF5, RAP1GAP, RAPGEF6, CIB1	916	20	17446	3.80917	1	0.786423	75.3715
GOTERM_MF_DIRECT	GO:0070491~repressing transcription factor binding	5	0.00318265	0.0844781	HDAC5, TBP, SKIL, RUNX1, PARK7	916	32	17446	2.97591	1	0.78144	75.4225
GOTERM_CC_DIRECT	GO:0001772~immunological synapse	5	0.00318265	0.0871748	ALCAM, PTPRJ, ITGAL, DUSP3, CD6	981	34	19662	2.94747	1	0.578667	73.977
GOTERM_MF_DIRECT	GO:0047485~protein N-terminus binding	11	0.00700182	0.0872449	MORF4L1, MEN1, TRP53, VWF, CDKN2A, CLU, PEX5, APTX, PCDH15, KCNQ2, CDH23	916	117	17446	1.79064	1	0.787215	76.5773
GOTERM_MF_DIRECT	GO:0002020~protease binding	11	0.00700182	0.0872449	LCN2, TRP53, VWF, DVL3, TRIP4, XIAP, SERPINB6A, NOS1AP, SELL, INS2, TIMP1	916	117	17446	1.79064	1	0.787215	76.5773
GOTERM_BP_DIRECT	GO:0045597~positive regulation of cell differentiation	6	0.00381917	0.0878788	MEN1, FGFR3, CLU, EOMES, SOX17, GHR	937	46	18082	2.5171	1	0.96401	81.4913
GOTERM_BP_DIRECT	GO:1900026~positive regulation of substrate adhesion-dependent cell spreading	5	0.00318265	0.0889943	TRIOBP, RAC1, CRK, DBN1, CIB1	937	33	18082	2.9239	1	0.964375	81.9021
GOTERM_BP_DIRECT	GO:0006898~receptor-mediated endocytosis	7	0.0044557	0.0891506	CLN3, SIGLECH, HSPH1, CD36, FCGR2B, APOE, LDLRAD3	937	60	18082	2.25141	1	0.96339	81.959
GOTERM_CC_DIRECT	GO:0030018~Z disc	11	0.00700182	0.0908174	ANK1, NOS1AP, SORBS2, ANK3, LDB3, HSPB1, FLNC, CACNA1C, CAPN3, DST, SYNPO	981	124	19662	1.77799	1	0.588573	75.4683
GOTERM_MF_DIRECT	GO:0017124~SH3 domain binding	11	0.00700182	0.0910997	FMN1, GPX1, ADAM10, FUT8, SH3KBP1, ABI2, INPP5D, PTTG1, RIMS1, SIRPA, ESPN	916	118	17446	1.77546	1	0.79679	78.1015
GOTERM_BP_DIRECT	GO:0045843~negative regulation of striated muscle tissue development	3	0.00190959	0.0914132	HDAC5, BDNF, LUC7L	937	10	18082	5.78933	1	0.965331	82.7634
GOTERM_BP_DIRECT	GO:0097120~receptor localization to synapse	3	0.00190959	0.0914132	CEP112, ANKS1B, NRXN1	937	10	18082	5.78933	1	0.965331	82.7634
GOTERM_BP_DIRECT	GO:0000012~single strand break repair	3	0.00190959	0.0914132	TDP1, APTX, SIRT1	937	10	18082	5.78933	1	0.965331	82.7634
GOTERM_BP_DIRECT	GO:0008340~determination of adult lifespan	4	0.00254612	0.0919263	TRP53, MSH2, INPP5D, RAD54L	937	21	18082	3.67576	1	0.964866	82.941
GOTERM_BP_DIRECT	GO:0010165~response to X-ray	4	0.00254612	0.0919263	TRP53, BLM, MSH2, TRP63	937	21	18082	3.67576	1	0.964866	82.941
GOTERM_BP_DIRECT	GO:0030154~cell differentiation	50	0.0318265	0.092227	SYT1, SYT2, L1CAM, DLK1, LGR4, CCHCR1, TRP63, ROBO4, PTBP3, SEMA3B, MKL2, CIB1, HFM1, ZFP423, EGFL7, SNAPC4, EOMES, TLE3, PARP11, ARHGAP24, RHBDD1, MECOM, MARK2, AMIGO1, EYA3, SPATA18, TGFB1I1, STMN1, DBN1, UNCX, FGFR3, ADCYAP1R1, FHL1, BEX1, PAQR7, MDK, RIMS1, DAZAP1, RASAL1, MUSK, SPEG, ETV5, SMAD5, NTNG1, SIRT1, SUV39H2, NTRK3, MICALCL, RGS20, GGNBP1	937	780	18082	1.23704	1	0.964115	83.0443
GOTERM_CC_DIRECT	GO:0031430~M band	4	0.00254612	0.0940315	ANK1, HSPB1, MYOM1, LMOD2	981	22	19662	3.64415	1	0.596262	76.7176
GOTERM_CC_DIRECT	GO:0031226~intrinsic component of plasma membrane	5	0.00318265	0.0947383	ALCAM, UNC5A, SLC24A2, CD63, CD6	981	35	19662	2.86326	1	0.593554	76.9843
GOTERM_MF_DIRECT	GO:0016922~ligand-dependent nuclear receptor binding	4	0.00254612	0.0947478	TRIP4, ARID1A, NCOR1, MED1	916	21	17446	3.62778	1	0.804982	79.458
GOTERM_CC_DIRECT	GO:0005635~nuclear envelope	13	0.00827488	0.096746	TOR1AIP2, TRPC7, CBX3, UBE2I, PARP11, ELAVL4, SIRT1, APOE, BNIP3L, TFDP2, NSMF, TPR, DST	981	158	19662	1.64909	1	0.596125	77.7262
GOTERM_CC_DIRECT	GO:0005607~laminin-2 complex	2	0.00127306	0.0972028	LAMC2, LAMB1	981	2	19662	20.0428	1	0.592518	77.8919
GOTERM_BP_DIRECT	GO:0030336~negative regulation of cell migration	10	0.00636529	0.0982568	PTPRJ, MUC2, ACVRL1, ADARB1, ABR, NISCH, EGFL7, ROBO4, FLCN, RNF41	937	106	18082	1.82054	1	0.970472	84.9951
GOTERM_CC_DIRECT	GO:0030133~transport vesicle	7	0.0044557	0.098631	FGFR3, RAB3D, AP1G2, SIPA1, GNAS, IL33, NRSN1	981	64	19662	2.19218	1	0.592798	78.4026

## Sheet: GO terms used for mapping
Supplemental Table S13. Go pathways used for mapping in the 6no9yes group
Category	Term	Count	%	PValue	Genes	List Total	Pop Hits	Pop Total	Fold Enrichment	Bonferroni	Benjamini	FDR
GOTERM_BP_DIRECT	cytoskeleton organization	17	0.010821	8.53019e-05	FMNL2, CCL3, ARC, TNIK, ZMYM3, ZMYM6, SIPA1L3, GAN, SIRPA, VILL, LSP1, PAK7, CAMSAP1, RAC1, CDC42BPA, SH3KBP1, DST	937	104	18082	3.15444	0.260774	0.0727555	0.156326
GOTERM_BP_DIRECT	intracellular signal transduction	39	0.0248246	0.000233574	NRG3, ECEL1, STK17B, MAP4K2, ITSN1, LATS2, RASAL1, HMHA1, PDPK1, TIAM2, PPP1R1B, PLCH1, DCLK2, INPP5D, ADCY10, AKT2, DVL3, ABR, TNIK, VAV3, SGK3, SPSB2, WNK2, NFAM1, PRKCD, CISH, MARK2, MAP4K4, RASSF5, MAPK14, RGS6, CDC42BPA, RGS7, DGKZ, HSPB1, UNC13C, SPATA13, PRKD3, KALRN	937	400	18082	1.88153	0.562822	0.152516	0.427501
GOTERM_BP_DIRECT	apoptotic process	47	0.0299169	0.00192914	STEAP3, DCC, FHIT, FGFR3, TMEM214, XIAP, SCML2, S100A9, STK17B, TMEM219, SHF, PDCD1, PAK7, GPX1, G2E3, NISCH, CDKN2A, UNC5A, CDIP1, TRP63, UNC5C, INPP5D, TRAF7, SRGN, AKT2, CIB1, TRP53, MUC2, LGALS12, FAM188A, MECOM, STAT1, RHBDD1, PRKCD, SIRT1, DNASE2A, LSP1, LCN2, 6330408A02RIK, BFAR, RASSF5, EPHA7, MAPK14, BNIP3L, SH3KBP1, APBB1, RNF41	937	570	18082	1.59122	0.998929	0.463013	3.47942
GOTERM_BP_DIRECT	cell migration	21	0.0133671	0.0021838	CLN3, ERG, ARC, VAV3, FUT8, FSCN1, ASTN1, ABI2, CD151, CD63, SIRPA, MDK, PDPK1, SORBS2, ST14, RAC1, CDC42BPA, SH3KBP1, LAMB1, SPATA13, MYO18A	937	191	18082	2.12174	0.999566	0.47549	3.9301
GOTERM_BP_DIRECT	endocytosis	20	0.0127306	0.00270359	DNM3, CLN3, SYNRG, CAV1, ARC, RALBP1, ITSN1, CD209E, ASGR1, SYP, FNBP1, ATP9A, RAC1, RABGEF1, SH3KBP1, WIPF1, STEAP2, SNX10, AP2M1, GHR	937	181	18082	2.13235	0.999932	0.495877	4.84378
GOTERM_BP_DIRECT	locomotory behavior	14	0.00891141	0.00381822	OPRM1, ASTN1, PCDH15, ELAVL4, ASL, ESPN, PAK6, PAK7, APBA2, ETV5, NEGR1, CACNA1B, CDH23, GNG7	937	108	18082	2.50156	0.999999	0.594783	6.77544
GOTERM_BP_DIRECT	cell adhesion	40	0.0254612	0.0043005	ITGAL, SPG7, ASTN1, PCDHGC5, ITGB5, POSTN, L1CAM, MEGF10, EPHB4, EPHB1, ITGAM, CDH8, ALCAM, COL7A1, SORBS2, RAC1, COL12A1, CD6, LAMB1, NEGR1, SPP1, CIB1, CDH23, COL18A1, SELP, EGFL7, SELL, PCDH15, NRXN1, CD63, TINAGL1, SSPO, AMIGO1, VWF, CD36, PKP4, CD99L2, LAMC2, DST, SELE	937	485	18082	1.59157	1	0.614832	7.59971
GOTERM_BP_DIRECT	angiogenesis	23	0.0146402	0.00651451	COL18A1, CAV1, VAV3, ACVRL1, EGFL7, TBX4, SMAD5, NRXN1, ESM1, ARHGAP24, EPHB4, SIRT1, EPHB1, WARS, PROK2, PLXDC1, MAPK14, ROBO4, TGFA, SOX17, BCAS3, MED1, CIB1	937	239	18082	1.85711	1	0.704301	11.296
GOTERM_BP_DIRECT	cellular response to DNA damage stimulus	35	0.0222785	0.00673839	MORF4L1, CLSPN, APEX2, BLM, RAD23A, INTS3, PTTG1, ZBTB38, MEN1, MCM7, ASH2L, RNF168, POLQ, APEX1, RTEL1, CIB1, TRP53, PGAP2, VAV3, MSH2, LIG1, SIRT4, APTX, SIRT1, RAD54L, SPDYA, EYA3, UHRF1, TIMELESS, UBA1, MAPK14, SPATA18, IKBKG, NCOA6, APBB1	937	420	18082	1.60815	1	0.698024	11.6619
GOTERM_BP_DIRECT	leukocyte cell-cell adhesion	6	0.00381917	0.00686336	ITGAL, SELP, L1CAM, CCL5, SELE, ITGAM	937	24	18082	4.82444	1	0.687018	11.8655
GOTERM_BP_DIRECT	negative regulation of JNK cascade	6	0.00381917	0.00686336	MEN1, DUSP3, PER1, MECOM, NCOR1, GPS2	937	24	18082	4.82444	1	0.687018	11.8655
GOTERM_BP_DIRECT	negative regulation of neuron death	9	0.00572876	0.00781998	BDNF, NOS1AP, APOE, CCL5, MDK, SIRT1, GH, PARK7, GHR	937	56	18082	3.10143	1	0.717469	13.4095
GOTERM_CC_DIRECT	cytoskeleton	93	0.0591972	1.09496e-06	FAM110A, LZTS2, CROCC, S100A9, TTC28, LATS2, TTLL11, ACTR3, FRMD5, D430042O09RIK, NUDCD2, ATAT1, ANK1, CEP250, ANK3, DYNLL2, CAMSAP1, TMUB1, LMOD2, TPR, ADCY10, CIB1, GOLGA2, CEP112, ARC, RPGR, TNIK, RELB, LDB3, GAN, PDE4D, FLNC, ARHGAP24, MARK2, EML2, FMN1, MIB1, SMTN, AKAP5, SH3KBP1, HSPB1, MAPRE2, NEURL4, STMN1, TGFB1I1, DST, MYO18A, SNX10, ADD1, KALRN, CEP97, TRIOBP, LRRCC1, ABI2, CNTRL, KIF9…	981	1113	19662	1.67474	0.000653481	0.000217874	0.00161606
GOTERM_CC_DIRECT	cell projection	66	0.0420109	1.81641e-06	GFAP, GLRA1, TMEM237, L1CAM, ITSN1, MEGF10, TTLL11, FAM168B, ACTR3, PDPK1, D430042O09RIK, CCDC40, ATAT1, TIAM2, CEP250, UNC5A, ANK3, ADCY10, CIB1, PTPRJ, ANKS1B, ARC, RPGR, LDB3, SCYL3, ARHGEF15, ARHGAP24, AMIGO1, GTF2I, GNAS, DBN1, DST, SPATA13, CRIPT, SNX14, ABI2, STARD10, TTC8, MDK, EPHB1, ESPN, ALCAM, MUSK, HNRNPK, RGS12, IFT46, MACF1, SORBS2, RAC1, LMTK3, WIPF1, SYNPO, SPP1, OSBPL3, MAK, TTC…	981	712	19662	1.8579	0.00108381	0.000271062	0.00268082
GOTERM_CC_DIRECT	dendrite	49	0.0311899	6.44424e-06	OPRM1, ACVRL1, LTBP1, GLRA1, L1CAM, KCNJ12, BDNF, APOE, ANK3, TRP63, ADCY10, HTR1D, NEGR1, CIB1, KCNMA1, C4B, UBE2I, ARHGEF15, AMIGO1, PLXDC1, HSPB1, GRIP2, GNAS, ADD1, RAP1GAP, SNX14, CRIPT, ABI2, STAU2, EPHB1, STAU1, ALCAM, RGS12, SORBS2, LMTK3, SYNPO, NIN, FSCN1, DLGAP4, STAT1, ELAVL4, EPHA7, DRP2, MAP2, CACNA1G, NSMF, CACNA1C, CACNA1A, CACNA1B	981	490	19662	2.00428	0.00383983	0.000769149	0.0095107
GOTERM_CC_DIRECT	postsynaptic density	28	0.0178228	6.38048e-05	CRIPT, RIMS1, PDPK1, HNRNPK, MACF1, SORBS2, LRFN1, AXIN2, SYNPO, ANKS1B, DNM3, ARC, ADAM10, MAPK10, MIB1, RGS20, EPS8, DRP2, PKP4, MAP2, AKAP5, GRIP2, NSMF, CACNA1C, DST, DBN1, ADD1, KALRN	981	239	19662	2.34811	0.0373763	0.00422357	0.0941289
GOTERM_CC_DIRECT	focal adhesion	38	0.0241881	0.000146823	OPRM1, TRIOBP, CAV1, FHL1, TSPAN4, SRP68, LMO7, ITGB5, L1CAM, CD151, ACTR3, ALCAM, PRKAR2A, PDPK1, HNRNPK, ATAT1, SORBS2, RAC1, STX16, SLC4A2, TES, BSG, ADAM10, CAPN5, PI4KA, FLNC, ARHGAP24, RFWD2, RPS18, CCND3, GNB2, LASP1, SH3KBP1, CD99L2, HSPB1, TGFB1I1, DST, ADD1	981	391	19662	1.94789	0.0839273	0.00793738	0.216478
GOTERM_CC_DIRECT	neuronal cell body	47	0.0299169	0.000226644	CALCR, MOB4, LTBP1, ACVRL1, RAP1GAP, GLRA1, CRIPT, TAC1, L1CAM, KCNJ12, ASL, STAU2, STAU1, ALCAM, BDNF, RGS12, PPP1R1B, PDE1C, APOE, SORBS2, VPS16, ADCY10, NEGR1, GHR, GOLGA2, CIB1, KCNMA1, C4B, DLGAP4, MYO1D, VTI1B, NRXN1, ELAVL4, EPHA7, GTF2I, PLXDC1, MAP2, CACNA1G, AKAP5, GNAS, NRSN1, CACNA1C, APBB1, DBN1, CACNA1A, KALRN, CACNA1B	981	534	19662	1.76407	0.126565	0.0112135	0.333986
GOTERM_CC_DIRECT	neuron projection	39	0.0248246	0.000297713	CALCR, OPRM1, SYT1, GLRA1, ADCYAP1R1, CLU, ITSN1, STAU1, TPM3, HNRNPA3, SYP, RGMA, ACOT7, ANK1, ANK3, TRP63, POU4F1, UNC5C, CIB1, CLN3, RALBP1, OPRL1, AK1, MYO1D, MAPK10, PARK7, EPS8, TENM1, SSTR1, MAP2, TSGA10, SH3KBP1, NSMF, STMN1, AHCYL2, NRSN1, KALRN, MPST, CACNA1B	981	420	19662	1.86112	0.162857	0.0135809	0.438499
GOTERM_CC_DIRECT	cytoplasmic vesicle	51	0.032463	0.00139647	SYT1, OCLN, AP1G2, SYT2, SYT6, AMOTL2, SYP, MFF, BDNF, PDPK1, AP1S2, TGFA, IL15RA, VPS16, KDELR1, CLN3, ARC, NUDT1, ATG9A, SGK3, ANP32E, SLC34A3, MIB1, UHRF1, TRAPPC8, BACE1, SH3KBP1, GNAS, NRSN1, DST, COPE, PPFIA3, CAV1, FGFR3, CLU, ASTN1, IL33, FOLR1, STX17, RAC1, WIPF1, TRAF7, SNX24, AXIN2, OPRL1, MYO1D, CYB561, SLC17A5, RGS20, FNBP1, ARAP1	981	646	19662	1.58233	0.565811	0.0508062	2.04138
GOTERM_CC_DIRECT	axon	33	0.0210055	0.00180739	CALCR, DCC, SYT1, RAP1GAP, SYT2, TAC1, L1CAM, STAU2, EPHB1, FAM168B, ALCAM, BDNF, ATAT1, ANK3, ATG7, LMTK3, VPS16, ADCY10, EIF2B2, SYNPO, CIB1, SLC12A6, DNM3, NIN, C4B, MYO1D, STAT1, SIRT1, PARK7, ITPR2, RNF6, BACE1, HSPB1	981	370	19662	1.7876	0.6604	0.0552561	2.63463
GOTERM_CC_DIRECT	voltage-gated calcium channel complex	6	0.00381917	0.0058599	CACNB1, CACNA1G, PDE4D, CACNA1C, CACNA1A, CACNA1B	981	24	19662	5.0107	0.970063	0.13601	8.30858
GOTERM_MF_DIRECT	metal ion binding	226	0.143856	2.36651e-05	SYT1, ALAD, SYT2, FAM20B, S100A9, POSTN, SYT6, ITSN1, ISG20, HMHA1, ZGPAT, G2E3, PLS3, GGTA1, CDH23, ESCO1, GTPBP8, LIG1, ZFP467, MECOM, BRAP, MARK2, CARNS1, UHRF1, NAPEPLD, ZFP280C, MTF2, EIF2S2, ZZZ3, TGFB1I1, ST18, PRDM1, UNC13C, PLA2G2D, MOB4, RIMS1, NR1H2, MUSK, MACF1, LHX9, COL18A1, ESRRA, AGBL1, ZFP600, AGBL4, AGBL5, SMAD5, MGAT4C, TRIM34A, ESRRG, U2AF1L4, PPA2, GNAT2, RNF6, RNF208, ATP2A3…	916	3355	17446	1.28297	0.0245655	0.0123591	0.0376205
GOTERM_MF_DIRECT	kinase activity	59	0.0375552	0.000142858	CDK19, STK33, ACVRL1, FAM20B, LATS2, DMPK, PAK6, PAK7, PDPK1, PRKAR2A, AKT2, CDC7, MAGI3, TNIK, SGK3, NOL9, PI4KA, WNK2, CDKL3, CDKL2, PRKCD, MARK2, DDR1, MAP4K4, NRK, RIPK4, PRKD3, KALRN, STK16, CCL3, ALDH18A1, FGFR3, GNE, MAP4K2, STK17B, HK1, TRRAP, EPHB4, EPHB1, VRK1, MUSK, SPEG, LMTK3, DCLK2, STK19, RYK, MAK, AK1, AK4, MAPK10, NTRK3, EPHA7, PLK4, MAPK14, IKBKG, CDC42BPA, DGKZ, IKBKB, CRK	916	674	17446	1.66722	0.139425	0.0368427	0.2269
GOTERM_MF_DIRECT	transferase activity	105	0.0668356	0.00100256	STK33, RNMT, TRMT2A, FAM20B, GGT1, DMPK, ELOVL1, GSTM1, G2E3, ATAT1, GGTA1, ESCO1, TNIK, SPTLC3, PARP11, WNK2, CDKL3, CDKL2, MARK2, MAP4K4, RIPK4, PRDM1, MPST, KALRN, STK16, FGFR3, GNE, SETD1B, MAP4K2, STK17B, EPHB4, EPHB1, VRK1, MUSK, ZDHHC9, HECTD2, LMTK3, STK19, POLQ, GAL3ST1, ST6GAL2, DHDDS, EHMT1, MOCS2, RYK, AK1, MGAT4C, AK4, EHMT2, PORCN, SUV39H2, NTRK3, POLRMT, EPHA7, PLK4, HMGCS2, METTL1…	916	1472	17446	1.35857	0.651534	0.110535	1.5822
GOTERM_MF_DIRECT	mitogen-activated protein kinase binding	7	0.0044557	0.00121999	PTPRJ, MICALCL, GTF2I, ATF7, TPR, SIRT1, STAU2	916	24	17446	5.55504	0.722795	0.12041	1.92224
GOTERM_MF_DIRECT	actin binding	32	0.0203689	0.00181922	TRIOBP, CROCC, VILL, TPM3, ESPN, ACTR3, MACF1, VPS16, WIPF1, MKL2, LMOD2, PLS3, SYNPO, KCNMA1, PPP1R18, FMNL2, ARC, PHACTR3, MYO1B, FSCN1, MYO1D, FLNC, LSP1, TNNT2, FMN1, EPS8, LASP1, LIMCH1, AKAP5, DBN1, DST, ADD1	916	338	17446	1.80316	0.852473	0.159683	2.85366
GOTERM_MF_DIRECT	RNA binding	61	0.0388283	0.00187741	RALY, RNMT, TARS2, TRMT2A, SRP68, TRMT1, ISG20, SIN3A, DGCR8, PCBP4, TARDBP, DHX34, SRRM1, RBMS3, PTBP3, RBM41, NUDT1, NOL9, RBM46, NIP7, SF1, MBNL1, RPS18, EIF4A2, ESRP1, CELF2, CPSF6, HMGB3, ENDOV, PUS1, SETD1B, PUS10, BICC1, STAU2, DAZAP1, STAU1, HNRNPA3, HNRNPM, MOV10, HNRNPK, HNRNPF, WDHD1, APEX1, HNRNPAB, DHX9, ADARB1, CSTF2, ADARB2, PAIP1, GRSF1, ELAVL2, ELAVL4, U2AF1L4, PARK7, SAFB2, ATXN…	916	780	17446	1.48948	0.86124	0.151754	2.94367
GOTERM_MF_DIRECT	sialic acid binding	4	0.00254612	0.00660125	SIGLECH, SELP, L1CAM, SELE	916	8	17446	9.52293	0.999052	0.320717	9.99518
GOTERM_MF_DIRECT	transcription factor binding	30	0.0190959	0.00754807	CAMTA2, NIF3L1, TBP, SOX8, TRIM11, MED12L, SIN3A, CDKN2A, HNRNPK, ATG7, HNRNPF, TFDP2, PER1, SOX17, BCAS3, BCOR, ARHGEF10L, TRP53, UBE2I, SIRT1, PARK7, HDAC5, MLX, ATF7, KAT6B, APBB1, ARAP1, NFIA, ADD1, MED1	916	342	17446	1.67069	0.999652	0.342369	11.3495
GOTERM_MF_DIRECT	protein kinase binding	36	0.022915	0.00774954	CAV1, ACVRL1, CACUL1, RIMS1, CCNE2, GSTM1, PDPK1, MUSK, VRK1, CDKN2A, CEP250, STX17, RAC1, CD6, AXIN2, GHR, GOLGA2, CIB1, PTPRJ, TRP53, ADAM10, MSH2, PRKCD, HDAC5, SPDYA, RPS18, RGS20, DUSP3, PIH1D1, CCND3, TOM1L2, AKAP5, LIME1, PLA2G6, HSPB1, IKBKB	916	434	17446	1.57984	0.999719	0.335569	11.6352

## Sheet: All KEGG terms
Supplemental Table S13. All KEGG pathways in the 6no9yes group
Category	Term	Count	%	PValue	Genes	List Total	Pop Hits	Pop Total	Fold Enrichment	Bonferroni	Benjamini	FDR
KEGG_PATHWAY	mmu04010:MAPK signaling pathway	27	0.0171863	0.000306196	FGFR3, CACNB1, MAP4K2, GNG12, HSPA1B, BDNF, RAC1, AKT2, PTPN7, TRP53, CACNG6, RELB, MAPK10, MECOM, FLNC, MAP4K4, DUSP3, MAPK14, IKBKG, CACNA1G, HSPB1, STMN1, CACNA1C, IKBKB, CRK, CACNA1A, CACNA1B	385	251	7691	2.14888	0.0771013	0.0771013	0.399971
KEGG_PATHWAY	mmu04930:Type II diabetes mellitus	9	0.00572876	0.00304709	CACNA1G, HK1, INS2, MAPK10, IKBKB, CACNA1C, PRKCD, CACNA1A, CACNA1B	385	50	7691	3.59579	0.550472	0.329531	3.91504
KEGG_PATHWAY	mmu05212:Pancreatic cancer	10	0.00636529	0.00468743	TRP53, CDKN2A, RALBP1, IKBKG, RAC1, TGFA, MAPK10, STAT1, IKBKB, AKT2	385	65	7691	3.07333	0.707998	0.33657	5.96352
KEGG_PATHWAY	mmu04620:Toll-like receptor signaling pathway	12	0.00763835	0.0116456	CCL3, IRF5, MAPK14, IKBKG, RAC1, MAPK10, CCL5, STAT1, IKBKB, CCL4, SPP1, AKT2	385	101	7691	2.37346	0.953535	0.535717	14.2125
KEGG_PATHWAY	mmu05145:Toxoplasmosis	12	0.00763835	0.0153009	PDPK1, IGTP, XIAP, MAPK14, IKBKG, LAMC2, HSPA1B, MAPK10, STAT1, IKBKB, LAMB1, AKT2	385	105	7691	2.28304	0.9824	0.554236	18.2731
KEGG_PATHWAY	mmu05200:Pathways in cancer	30	0.0190959	0.0230565	DCC, FGFR3, XIAP, GNG12, TPM3, CCNE2, CDKN2A, RAC1, SLC2A1, TGFA, RUNX1, LAMB1, AXIN2, TPR, GNG7, AKT2, TRP53, DVL3, RALBP1, MSH2, MAPK10, MECOM, STAT1, RASSF5, GNB2, IKBKG, GNAS, LAMC2, IKBKB, CRK	385	395	7691	1.51721	0.997783	0.638895	26.3073
KEGG_PATHWAY	mmu04510:Focal adhesion	18	0.0114575	0.0294621	CAV1, VAV3, XIAP, ITGB5, MAPK10, FLNC, PAK6, VWF, PAK7, PDPK1, CCND3, RAC1, COL1A2, LAMC2, LAMB1, CRK, SPP1, AKT2	385	207	7691	1.7371	0.999604	0.67349	32.3861
KEGG_PATHWAY	mmu04723:Retrograde endocannabinoid signaling	11	0.00700182	0.0323835	NAPEPLD, GNB2, MAPK14, GNG12, MAPK10, CACNA1C, RIMS1, CACNA1A, CACNA1B, GNG7, ITPR2	385	103	7691	2.13343	0.99982	0.659763	35.0016
KEGG_PATHWAY	mmu05150:Staphylococcus aureus infection	7	0.0044557	0.037037	ITGAL, SELP, FCGR2B, C4B, CFB, CFH, ITGAM	385	50	7691	2.79673	0.999949	0.666683	38.9756
KEGG_PATHWAY	mmu04014:Ras signaling pathway	19	0.0120941	0.0371788	FGFR3, RALBP1, MAPK10, GNG12, BRAP, PAK6, RASAL1, PAK7, RASSF5, GNB2, IKBKG, RASAL3, RAC1, PLA2G6, INS2, IKBKB, PLA2G2D, AKT2, GNG7	385	229	7691	1.65745	0.999951	0.629408	39.0931
KEGG_PATHWAY	mmu04931:Insulin resistance	11	0.00700182	0.0475277	NR1H2, PDPK1, CD36, MLX, SLC2A1, INS2, MAPK10, IKBKB, PRKCD, G6PC3, AKT2	385	110	7691	1.99766	0.999997	0.686454	47.1255
KEGG_PATHWAY	mmu03440:Homologous recombination	5	0.00318265	0.0485395	BLM, SYCP3, POLD2, RAD54L, TOP3B	385	28	7691	3.56725	0.999998	0.662559	47.8559
KEGG_PATHWAY	mmu04380:Osteoclast differentiation	12	0.00763835	0.0497069	CALCR, FCGR2B, MAPK14, IKBKG, RAC1, RELB, MAPK10, STAT1, IKBKB, TREM2, SIRPA, AKT2	385	126	7691	1.90254	0.999998	0.642114	48.6869
KEGG_PATHWAY	mmu05211:Renal cell carcinoma	8	0.00509223	0.0519672	PAK6, PAK7, SLC2A1, RAC1, TGFA, FLCN, CRK, AKT2	385	68	7691	2.35019	0.999999	0.631646	50.2614
KEGG_PATHWAY	mmu04725:Cholinergic synapse	11	0.00700182	0.0552752	KCNQ5, GNB2, GNG12, KCNJ12, KCNQ2, CACNA1C, CACNA1A, CACNA1B, AKT2, GNG7, ITPR2	385	113	7691	1.94463	1	0.629604	52.4854
KEGG_PATHWAY	mmu04713:Circadian entrainment	10	0.00636529	0.0553171	NOS1AP, GNB2, ADCYAP1R1, CACNA1G, PER1, GNAS, GNG12, ADCY10, CACNA1C, GNG7	385	98	7691	2.03843	1	0.606169	52.5129
KEGG_PATHWAY	mmu04360:Axon guidance	12	0.00763835	0.0571225	DCC, PAK6, PAK7, EPHA7, UNC5A, RAC1, NTNG1, L1CAM, SEMA3B, UNC5C, EPHB4, EPHB1	385	129	7691	1.85829	1	0.596066	53.687
KEGG_PATHWAY	mmu05222:Small cell lung cancer	9	0.00572876	0.0576163	CCNE2, TRP53, FHIT, XIAP, IKBKG, LAMC2, IKBKB, LAMB1, AKT2	385	84	7691	2.14035	1	0.578429	54.0034
KEGG_PATHWAY	mmu05223:Non-small cell lung cancer	7	0.0044557	0.0591668	TRP53, FHIT, RASSF5, PDPK1, CDKN2A, TGFA, AKT2	385	56	7691	2.49708	1	0.568726	54.984
KEGG_PATHWAY	mmu04920:Adipocytokine signaling pathway	8	0.00509223	0.0668585	CD36, IKBKG, SLC2A1, MAPK10, IKBKB, POMC, G6PC3, AKT2	385	72	7691	2.21962	1	0.596064	59.5693
KEGG_PATHWAY	mmu05220:Chronic myeloid leukemia	8	0.00509223	0.0668585	TRP53, CDKN2A, IKBKG, RUNX1, IKBKB, MECOM, CRK, AKT2	385	72	7691	2.21962	1	0.596064	59.5693
KEGG_PATHWAY	mmu04917:Prolactin signaling pathway	8	0.00509223	0.070944	CGA, MAPK14, INS2, MAPK10, STAT1, PRL, CISH, AKT2	385	73	7691	2.18922	1	0.600714	61.8256
KEGG_PATHWAY	mmu04728:Dopaminergic synapse	12	0.00763835	0.0710467	GNB2, PPP1R1B, MAPK14, GNAS, GNG12, MAPK10, CACNA1C, CACNA1A, CACNA1B, AKT2, GNG7, ITPR2	385	134	7691	1.78895	1	0.584246	61.8808
KEGG_PATHWAY	mmu04151:PI3K-Akt signaling pathway	25	0.0159132	0.0714043	PHLPP2, FGFR3, ITGB5, GNG12, G6PC3, CCNE2, PDPK1, RAC1, LAMB1, PRL, GHR, AKT2, GNG7, SPP1, TRP53, SGK3, VWF, GNB2, CCND3, IKBKG, COL1A2, LAMC2, INS2, IKBKB, GH	385	351	7691	1.42284	1	0.569965	62.0723
KEGG_PATHWAY	mmu04722:Neurotrophin signaling pathway	11	0.00700182	0.083322	NTRK3, TRP53, BDNF, PDPK1, MAPK14, RAC1, MAPK10, IKBKB, CRK, PRKCD, AKT2	385	122	7691	1.80117	1	0.613158	67.9711
KEGG_PATHWAY	mmu04721:Synaptic vesicle cycle	7	0.0044557	0.0877623	SYT1, DNM3, UNC13C, RIMS1, CACNA1A, CACNA1B, AP2M1	385	62	7691	2.25543	1	0.618116	69.9431
KEGG_PATHWAY	mmu05032:Morphine addiction	9	0.00572876	0.0921953	OPRM1, GNB2, PDE1C, GNAS, PDE4D, GNG12, CACNA1A, CACNA1B, GNG7	385	93	7691	1.93322	1	0.622695	71.7994
KEGG_PATHWAY	mmu04623:Cytosolic DNA-sensing pathway	7	0.0044557	0.0987172	IKBKG, POLR1C, IL33, CCL5, IKBKB, CCL4, ADAR	385	64	7691	2.18494	1	0.635258	74.3387
KEGG_PATHWAY	mmu05210:Colorectal cancer	7	0.0044557	0.0987172	DCC, TRP53, MSH2, RAC1, MAPK10, AXIN2, AKT2	385	64	7691	2.18494	1	0.635258	74.3387
KEGG_PATHWAY	mmu05230:Central carbon metabolism in cancer	7	0.0044557	0.0987172	NTRK3, SLC16A3, TRP53, FGFR3, SLC2A1, HK1, AKT2	385	64	7691	2.18494	1	0.635258	74.3387

## Sheet: KEGG terms used for mapping
Supplemental Table S13. KEGG pathways used for mapping in the 6no9yes group
Category	Term	Count	%	PValue	Genes	List Total	Pop Hits	Pop Total	Fold Enrichment	Bonferroni	Benjamini	FDR
KEGG_PATHWAY	mmu04010:MAPK signaling pathway	27	0.0171863	0.000306196	FGFR3, CACNB1, MAP4K2, GNG12, HSPA1B, BDNF, RAC1, AKT2, PTPN7, TRP53, CACNG6, RELB, MAPK10, MECOM, FLNC, MAP4K4, DUSP3, MAPK14, IKBKG, CACNA1G, HSPB1, STMN1, CACNA1C, IKBKB, CRK, CACNA1A, CACNA1B	385	251	7691	2.14888	0.0771013	0.0771013	0.399971
KEGG_PATHWAY	mmu04930:Type II diabetes mellitus	9	0.00572876	0.00304709	CACNA1G, HK1, INS2, MAPK10, IKBKB, CACNA1C, PRKCD, CACNA1A, CACNA1B	385	50	7691	3.59579	0.550472	0.329531	3.91504
KEGG_PATHWAY	mmu05212:Pancreatic cancer	10	0.00636529	0.00468743	TRP53, CDKN2A, RALBP1, IKBKG, RAC1, TGFA, MAPK10, STAT1, IKBKB, AKT2	385	65	7691	3.07333	0.707998	0.33657	5.96352
KEGG_PATHWAY	mmu04620:Toll-like receptor signaling pathway	12	0.00763835	0.0116456	CCL3, IRF5, MAPK14, IKBKG, RAC1, MAPK10, CCL5, STAT1, IKBKB, CCL4, SPP1, AKT2	385	101	7691	2.37346	0.953535	0.535717	14.2125
KEGG_PATHWAY	mmu05145:Toxoplasmosis	12	0.00763835	0.0153009	PDPK1, IGTP, XIAP, MAPK14, IKBKG, LAMC2, HSPA1B, MAPK10, STAT1, IKBKB, LAMB1, AKT2	385	105	7691	2.28304	0.9824	0.554236	18.2731
KEGG_PATHWAY	mmu05200:Pathways in cancer	30	0.0190959	0.0230565	DCC, FGFR3, XIAP, GNG12, TPM3, CCNE2, CDKN2A, RAC1, SLC2A1, TGFA, RUNX1, LAMB1, AXIN2, TPR, GNG7, AKT2, TRP53, DVL3, RALBP1, MSH2, MAPK10, MECOM, STAT1, RASSF5, GNB2, IKBKG, GNAS, LAMC2, IKBKB, CRK	385	395	7691	1.51721	0.997783	0.638895	26.3073
KEGG_PATHWAY	mmu04510:Focal adhesion	18	0.0114575	0.0294621	CAV1, VAV3, XIAP, ITGB5, MAPK10, FLNC, PAK6, VWF, PAK7, PDPK1, CCND3, RAC1, COL1A2, LAMC2, LAMB1, CRK, SPP1, AKT2	385	207	7691	1.7371	0.999604	0.67349	32.3861
KEGG_PATHWAY	mmu04723:Retrograde endocannabinoid signaling	11	0.00700182	0.0323835	NAPEPLD, GNB2, MAPK14, GNG12, MAPK10, CACNA1C, RIMS1, CACNA1A, CACNA1B, GNG7, ITPR2	385	103	7691	2.13343	0.99982	0.659763	35.0016
KEGG_PATHWAY	mmu05150:Staphylococcus aureus infection	7	0.0044557	0.037037	ITGAL, SELP, FCGR2B, C4B, CFB, CFH, ITGAM	385	50	7691	2.79673	0.999949	0.666683	38.9756
KEGG_PATHWAY	mmu04014:Ras signaling pathway	19	0.0120941	0.0371788	FGFR3, RALBP1, MAPK10, GNG12, BRAP, PAK6, RASAL1, PAK7, RASSF5, GNB2, IKBKG, RASAL3, RAC1, PLA2G6, INS2, IKBKB, PLA2G2D, AKT2, GNG7	385	229	7691	1.65745	0.999951	0.629408	39.0931
KEGG_PATHWAY	mmu04931:Insulin resistance	11	0.00700182	0.0475277	NR1H2, PDPK1, CD36, MLX, SLC2A1, INS2, MAPK10, IKBKB, PRKCD, G6PC3, AKT2	385	110	7691	1.99766	0.999997	0.686454	47.1255
KEGG_PATHWAY	mmu03440:Homologous recombination	5	0.00318265	0.0485395	BLM, SYCP3, POLD2, RAD54L, TOP3B	385	28	7691	3.56725	0.999998	0.662559	47.8559
KEGG_PATHWAY	mmu04380:Osteoclast differentiation	12	0.00763835	0.0497069	CALCR, FCGR2B, MAPK14, IKBKG, RAC1, RELB, MAPK10, STAT1, IKBKB, TREM2, SIRPA, AKT2	385	126	7691	1.90254	0.999998	0.642114	48.6869
