# Supplementary material for: Identifying lncRNA–miRNA–mRNA networks to investigate Alzheimer’s disease pathogenesis and therapy strategy
Source: Aging (Albany NY). 2020 Feb 7;12(3):2897–920. doi: 10.18632/aging.102785 (PMC7041741; doi:10.18632/aging.102785)
Supplement: Supplementary Table 14 [file aging-12-102785-s009..xlsx]

## Sheet: Genes in the ce network
Supplementary Table S14. Genes in the ceRNA network of the 6yes9yes group
gene_name
Crem
Tnni1
Ndst3
Disc1
Emid1
Medag
Pik3c3
Wipi2
Myo6
Il12a
Elovl1
43710
Cacna1g
Dab2ip
Zbtb18
Pde4d
Itgam
Arhgef9
Pcdh15
Ltbp4
Sh3kbp1
Pnpla2
Dnm3
Cnot8
Arpp21
Tbc1d14
Rnasel
Rnf6
Anks1b
Fyn
Wdfy4
Thsd7a
Mtdh
Nup210
Mum1l1
Rngtt
Ccl25
B3gnt5
Cln3
Gm15800
Lrriq3
Rbfox2
Apol11b
Ncoa4
Zscan21
Smarca1
Astn1
Uhmk1
Mga
Il6st
Slc39a8
Cryz
Lox
Kxd1
43717
Cd82
Dclre1c
Tmcc3
Atp13a4
Mturn
Chm
Chst10
Mtmr3
Zfp639
Gm8923
Celf2
Ppp1r35
Lphn3
Emd
Slc44a1
1700024P16Rik
Myt1
Wdfy1
Phka1
Mov10
Chd7
Wnk2
Slc45a4
Itgav
BC017643
Sipa1l3
Gm21992
Lrrc47
Cdc45
Peg10
Brd2
Lrrc55
5031439G07Rik
Spag8
Atl3
Zfp800
Grik2
Fip1l1
Trim72
Rorb
Mrvi1
Pdgfa
Gpatch2
Pmp22
Tmem104
Dst
Azi2
Galnt15
Helz2
Fbxo9
Myl12a
Tmem67
Rasal3
Tmem59
Oxsm
Zfp248
Spef2
C2cd3
Hadhb
Dcbld1
Rbpms
Trnt1
Mcf2
Ebf2
Atp11c
Ikbkg
Zfx
Kansl1
Prnp
Slc14a1
Sirt1
Ap2a1
Dab2
Racgap1
Shroom3
Nin
Zfr
Rcbtb2
Tomm40l
Sos2
Calm1
Pip5k1b
Rims1
Map2k7
Egfl7
Ufd1l
Wfs1
4833439L19Rik
Adcyap1r1
Mapkapk5
Hlcs
Epb4.1l1
Specc1
Stim2
Rbm38
Ppara
Gnas
Pak3
Smim19
Aftph
Vwa5a
Ndufs1
Stat5a
9130019O22Rik
Tnip1
Poli
Cbln2
Gstm6
43531
Actr3
Zfp65
Ldb3
Mpp6
Ank1
Pitx2
Usp6nl
Serpina3f
Rsrc2
Nrp2
Aldh2
Vgf
Maged2
Gpsm1
Gng12
Ube2i
Huwe1
Unc93b1
Spag9
Gpr45
Mob1a
Herc3
Matr3
Ppp3cb
Tec
P2rx4
9530068E07Rik
Nod2
Mpv17
Rhbdd3
Kif7
Clasp1
Ank3
Cacna1c
Serpini1
Agrn
Pear1
C530008M17Rik
Hspb11
Dnajc13
Dda1
Lef1
Slc15a2
Etl4
Hbp1
Asap1
Mgat4a
Gm10273
Jade2
Psd4
Slc26a6
Pik3r6
Rnf4
Inppl1
Tpd52l2
Bcas3
Srr
Mdm1
Tdg
Phldb2
Sorbs2
2410002F23Rik
Dolpp1
Rnf24
Dopey1
Gabarap
Eif4enif1
Nsun6
Mid1
Cbfb
Slc19a2
Sbf1
Akr1c14
Fgfrl1
Rps6ka3
Ift140
Lrrc1
Pik3cd
Gapvd1
Ccdc88c
Trim2
Atg7
Nfia
Rnpepl1
Ahsa2
Cdk8
Arhgap24
Slc9a8
Acot11
Slc25a36
B4galt2
Cdkl3
Sec16a
Mprip
Pwwp2a
Cept1
Etv6
Foxo3
Vps29
Pcgf5
Kcnq2
Hmcn1
Ncoa6
Adcy7
Mak
Eda
Trmt2b
Vamp4
Gopc
Mkrn1
Tbcel
Gnb2
Tuba4a
S100pbp
Mtm1
Gata2
Zdhhc13
Fam198b
Ssfa2
Sgsm2
Mettl20
Fbln7
Sdcbp
Nudt5
Cdv3
Ccdc136
Far1
Nlrx1
Pvrl4
Ak4
Ntng2
Rpa1
Tmem191c
Dram2
Dmpk
Rell2
Stat4
Hpca
Vipas39
Morc4
Zfp423
Nfkbid
Tmem219
Pex1
Mapk8ip3
Sult1a1
Med12
Ranbp1
Gemin7
Pacsin3
Specc1l
Pja1
Dhrs3
Zfp444
Speg
Gck
Rps6ka1
Ppp5c
Ruvbl2
Ypel3
Ssh3
Apobec2
Gamt
Hipk4
Rdh12
Eif5a
Focad
Top3b
Fen1
Pnck
Zbtb5
Otof
Txnrd2
Smtn
Dnah9
Itgax
Zfyve19
Slc25a45
Myl4
App
Tnk2
Nfe2l1
Spata18
Wdtc1
Lypla2
Cacna1s

## Sheet: All GO terms
Supplemental Table S14. All Go pathways in the 6yes9yes group
Category	Term	Count	%	PValue	Genes	List Total	Pop Hits	Pop Total	Fold Enrichment	Bonferroni	Benjamini	FDR
GOTERM_MF_DIRECT	GO:0005515~protein binding	121	0.227632	2.63372e-11	IL6ST, GRIK2, STAT5A, RORB, FOXO3, CBFB, DMPK, GATA2, DAB2, APP, PACSIN3, ANK3, ATG7, PIK3C3, ETL4, LOX, MAP2K7, DISC1, PITX2, RBFOX2, DAB2IP, MYO6, C2CD3, STIM2, PDE4D, PNPLA2, SPAG9, SPAG8, GAPVD1, CBLN2, SDCBP, NFE2L1, DST, PPP5C, FIP1L1, NFKBID, ADCYAP1R1, MAPKAPK5, ASTN1, ASAP1, MYT1, TRIM72, RIMS1, UHMK1, MOV10, SRR, CLASP1, AGRN, EMD, TEC, NIN, PCDH15, RNF6, RNF4, EBF2, HPCA, IKBKG, CACNA1…	296	4092	17446	1.74283	1.5855e-08	1.5855e-08	3.89157e-08
GOTERM_CC_DIRECT	GO:0005737~cytoplasm	157	0.295357	4.51517e-08	RNASEL, CNOT8, STAT5A, EIF5A, FOXO3, GSTM6, DMPK, MEDAG, DAB2, APP, ANK1, HMCN1, PACSIN3, ANK3, SULT1A1, ATG7, ETL4, MAP2K7, DISC1, PITX2, RBFOX2, DAB2IP, MYO6, C2CD3, PNCK, LRRC1, PIK3CD, LYPLA2, PDE4D, WNK2, CDKL3, SPAG9, RBPMS, SPAG8, SGSM2, HUWE1, SPATA18, MGA, CELF2, TUBA4A, SDCBP, NFE2L1, 4833439L19RIK, DST, PPP5C, CDV3, AFTPH, ARPP21, SSH3, MAPKAPK5, ADCYAP1R1, ASAP1, MYT1, UHMK1, AZI2, MO…	325	6631	19662	1.4324	1.70672e-05	1.70672e-05	6.24592e-05
GOTERM_BP_DIRECT	GO:0045944~positive regulation of transcription from RNA polymerase II promoter	37	0.0696064	1.68049e-05	PPARA, RNASEL, HELZ2, CREM, STAT5A, ZFP639, FOXO3, MYT1, CBFB, PCGF5, GATA2, NOD2, APP, STAT4, CHD7, ZSCAN21, PPP3CB, AGRN, ETV6, BCAS3, TNIP1, PITX2, DAB2IP, MYO6, MED12, LEF1, SIRT1, RPS6KA3, SPAG8, RPS6KA1, RNF4, EBF2, IKBKG, NCOA6, RUVBL2, NFE2L1, NFIA	309	995	18082	2.17604	0.0307251	0.0307251	0.0286389
GOTERM_CC_DIRECT	GO:0016020~membrane	150	0.282188	6.61457e-05	SLC9A8, SLC44A1, PEAR1, ADCY7, IL6ST, WFS1, GRIK2, PDGFA, FGFRL1, MPV17, EIF5A, FOXO3, CBFB, RELL2, DMPK, ELOVL1, DAB2, APP, ANK1, PACSIN3, GPR45, ANK3, PIK3C3, LRRC55, DISC1, SMIM19, DAB2IP, MYO6, LRRC1, MED12, STIM2, PSD4, CCDC136, SIPA1L3, PDE4D, PNPLA2, WNK2, MAGED2, GAPVD1, HUWE1, SPATA18, SLC25A36, VAMP4, SDCBP, RNF24, NFE2L1, PMP22, EDA, DST, PPP5C, DCBLD1, 9530068E07RIK, ADCYAP1R1, PHKA1,…	325	6998	19662	1.29677	0.0246939	0.0124241	0.0914618
GOTERM_BP_DIRECT	GO:0030154~cell differentiation	30	0.0564377	7.18294e-05	NRP2, VIPAS39, ADCYAP1R1, MYT1, RIMS1, GATA2, DAB2, PEG10, ZSCAN21, SPEG, ITGAV, GPSM1, AGRN, ETV6, TEC, ZFP423, EGFL7, PIK3CD, NTNG2, ARHGAP24, RACGAP1, SIRT1, THSD7A, SPAG8, HUWE1, SPATA18, RBM38, TNK2, EDA, PMP22	309	780	18082	2.25068	0.124878	0.0645204	0.122357
GOTERM_MF_DIRECT	GO:0046872~metal ion binding	84	0.158025	0.000119905	NRP2, APOBEC2, MKRN1, PPARA, RNASEL, CNOT8, ADCY7, HELZ2, ZFP639, RORB, DMPK, PCGF5, GATA2, JADE2, APP, TRIM2, ZFYVE19, PAK3, LOX, MAP2K7, NDUFS1, ZFP423, POLI, ZFX, NUDT5, STIM2, LDB3, PDE4D, ZFR, PJA1, RNF24, GNAS, PRNP, DST, MATR3, PPP5C, VPS29, ZFP65, MOB1A, YPEL3, ASAP1, TRIM72, MYT1, RIMS1, ZBTB18, ITGAM, RPA1, MTMR3, PEG10, CEPT1, ITGAX, MORC4, SORBS2, ZSCAN21, ITGAV, GALNT15, SRR, PPP3CB,…	296	3355	17446	1.47568	0.0696432	0.03545	0.177025
GOTERM_CC_DIRECT	GO:0030424~axon	18	0.0338626	0.000149918	NRP2, DNM3, DAB2IP, MYO6, NIN, GRIK2, NTNG2, SIRT1, UHMK1, P2RX4, RNF6, APP, ANK3, ATG7, HPCA, TXNRD2, TNK2, DISC1	325	370	19662	2.94317	0.0550971	0.0187137	0.207185
GOTERM_MF_DIRECT	GO:0016301~kinase activity	26	0.0489126	0.00020909	MAPKAPK5, PHKA1, PIP5K1B, UHMK1, DMPK, PACSIN3, PAK3, SPEG, PIK3C3, MAP2K7, TEC, MAK, PNCK, PIK3CD, CDK8, WNK2, AK4, CDKL3, RPS6KA3, GCK, RPS6KA1, FYN, IKBKG, MAPK8IP3, HIPK4, TNK2	296	674	17446	2.27362	0.118284	0.0410936	0.308506
GOTERM_MF_DIRECT	GO:0000166~nucleotide binding	54	0.101588	0.000270178	RNASEL, ADCY7, HELZ2, ATL3, PIP5K1B, HLCS, RNGTT, DMPK, ACTR3, NOD2, PEX1, PAK3, SULT1A1, PIK3C3, MAP2K7, RBFOX2, MYO6, PNCK, PIK3CD, CDK8, UBE2I, WNK2, CDKL3, RBPMS, HIPK4, CELF2, TUBA4A, GNAS, RUVBL2, RBM38, SMARCA1, MATR3, MAPKAPK5, NLRX1, UHMK1, GM21992, MOV10, CHD7, KIF7, SPEG, SRR, TEC, DNM3, NIN, MAK, AK4, ATP11C, ATP13A4, TRNT1, RPS6KA3, RPS6KA1, GCK, FYN, TNK2	296	1936	17446	1.64396	0.150128	0.0398515	0.398472
GOTERM_BP_DIRECT	GO:0006468~protein phosphorylation	23	0.0432689	0.000373547	RNASEL, MAK, MAPKAPK5, PNCK, PHKA1, CDK8, WNK2, CDKL3, UHMK1, DMPK, STAT4, RPS6KA3, APP, RPS6KA1, PAK3, FYN, SPEG, PIK3C3, PPP3CB, HIPK4, TNK2, MAP2K7, TEC	309	576	18082	2.33665	0.50033	0.206474	0.63478
GOTERM_MF_DIRECT	GO:0005524~ATP binding	44	0.0827752	0.000475243	RNASEL, DNAH9, ADCY7, HELZ2, MAPKAPK5, PIP5K1B, NLRX1, HLCS, UHMK1, DMPK, ACTR3, MOV10, NOD2, CHD7, KIF7, PEX1, SPEG, PAK3, PIK3C3, SRR, MAP2K7, TEC, MYO6, MAK, PNCK, PIK3CD, CDK8, UBE2I, WNK2, AK4, ATP11C, CDKL3, ATP13A4, TRNT1, P2RX4, RPS6KA3, RPS6KA1, GCK, FYN, HIPK4, RUVBL2, TNK2, SMARCA1, PPP5C	296	1507	17446	1.72085	0.248861	0.0556259	0.699924
GOTERM_MF_DIRECT	GO:0016740~transferase activity	43	0.080894	0.000556054	NDST3, MAPKAPK5, TRMT2B, PIP5K1B, GSTM6, UHMK1, DMPK, HADHB, RNGTT, ELOVL1, NSUN6, CEPT1, B3GNT5, CHST10, SPEG, PAK3, SULT1A1, PIK3C3, GALNT15, MAP2K7, TEC, MGAT4A, POLI, B4GALT2, MAK, PNCK, PIK3CD, NUDT5, CDK8, WNK2, AK4, CDKL3, OXSM, TRNT1, RPS6KA3, RPS6KA1, HUWE1, GCK, FYN, ZDHHC13, HIPK4, GAMT, TNK2	296	1472	17446	1.72173	0.284546	0.0542777	0.818484
GOTERM_CC_DIRECT	GO:0045177~apical part of cell	9	0.0169313	0.000640639	P2RX4, APP, MYO6, SHROOM3, NIN, OTOF, SRR, SIPA1L3, EDA	325	115	19662	4.73466	0.215132	0.0587625	0.882574
GOTERM_CC_DIRECT	GO:0005856~cytoskeleton	34	0.0639627	0.000814421	SHROOM3, SSH3, ACTR3, NOD2, ZFYVE19, ANK1, ANK3, SORBS2, CLASP1, BCAS3, DISC1, TEC, SPECC1L, DNM3, C2CD3, NIN, MAK, INPPL1, LDB3, PDE4D, TBCEL, RACGAP1, ARHGAP24, MID1, GABARAP, MPRIP, TMEM67, SPAG8, SMTN, SH3KBP1, TUBA4A, SDCBP, DST, MDM1	325	1113	19662	1.84811	0.265067	0.0597367	1.12074
GOTERM_CC_DIRECT	GO:0005829~cytosol	48	0.0903002	0.000898477	VPS29, AFTPH, STAT5A, PIP5K1B, ASAP1, HLCS, FOXO3, DMPK, NOD2, PEX1, PAK3, ATG7, SULT1A1, TBC1D14, ACOT11, PIK3C3, SEC16A, GPSM1, PPP3CB, CHM, GEMIN7, MAP2K7, TEC, EIF4ENIF1, WDTC1, WDFY1, INPPL1, UFD1L, CCDC88C, UBE2I, PNPLA2, WNK2, CRYZ, WIPI2, SIRT1, GABARAP, SPAG9, GAPVD1, RNF4, GCK, FYN, IKBKG, SDCBP, GNAS, RBM38, CALM1, TOP3B, PPP5C	325	1784	19662	1.62776	0.288071	0.0550559	1.23574
GOTERM_MF_DIRECT	GO:0044325~ion channel binding	9	0.0169313	0.000995027	FYN, ANK3, GOPC, PDE4D, AGRN, PRNP, CACNA1C, RIMS1, CALM1	296	120	17446	4.42044	0.450806	0.0820523	1.46021
GOTERM_BP_DIRECT	GO:0006897~endocytosis	11	0.0206938	0.00110879	CLN3, DNM3, DAB2, APP, MYO6, GAPVD1, PACSIN3, AP2A1, INPPL1, SH3KBP1, TNK2	309	181	18082	3.55633	0.872568	0.402525	1.87314
GOTERM_CC_DIRECT	GO:0000139~Golgi membrane	17	0.0319813	0.00112937	MGAT4A, SLC9A8, CLN3, NDST3, GABARAP, ACTR3, FAM198B, B3GNT5, CHST10, TMEM59, ZDHHC13, GOPC, SEC16A, GALNT15, GPSM1, RNF24, MAPK8IP3	325	403	19662	2.55204	0.347629	0.0591958	1.551
GOTERM_BP_DIRECT	GO:0007507~heart development	13	0.0244563	0.00180187	TMEM67, NRP2, GATA2, PPARA, HSPB11, NCOA6, MED12, PPP3CB, TXNRD2, LOX, CACNA1C, IFT140, PITX2	309	261	18082	2.91468	0.964884	0.488198	3.02715
GOTERM_BP_DIRECT	GO:0016310~phosphorylation	22	0.0413876	0.00194293	MAK, MAPKAPK5, PNCK, PIK3CD, PIP5K1B, CDK8, WNK2, AK4, CDKL3, UHMK1, DMPK, RPS6KA3, RPS6KA1, GCK, PAK3, FYN, SPEG, PIK3C3, HIPK4, TNK2, MAP2K7, TEC	309	612	18082	2.10358	0.97299	0.452243	3.26047
GOTERM_MF_DIRECT	GO:0008134~transcription factor binding	15	0.0282188	0.00213614	RBFOX2, PPARA, MED12, LEF1, RORB, UBE2I, SIRT1, GATA2, RPS6KA1, RNF4, ATG7, TDG, BCAS3, NFIA, PITX2	296	342	17446	2.58505	0.723994	0.148637	3.11034
GOTERM_MF_DIRECT	GO:0008017~microtubule binding	11	0.0206938	0.00219733	DNM3, SPAG8, KIF7, CLASP1, MID1, PRNP, RACGAP1, DST, MDM1, GABARAP, PPP5C	296	200	17446	3.24166	0.733997	0.136826	3.19809
GOTERM_MF_DIRECT	GO:0005096~GTPase activator activity	12	0.0225751	0.00226612	DAB2IP, GAPVD1, SGSM2, TBC1D14, RASAL3, CHM, SIPA1L3, ASAP1, RANBP1, RACGAP1, ARHGAP24, USP6NL	296	235	17446	3.00966	0.744812	0.127659	3.29665
GOTERM_CC_DIRECT	GO:0031410~cytoplasmic vesicle	22	0.0413876	0.00252329	CLN3, MYO6, VIPAS39, ASTN1, UNC93B1, VGF, TRIM72, RACGAP1, GABARAP, USP6NL, DAB2, SPAG8, SLC26A6, APP, OTOF, ZDHHC13, PIK3C3, SH3KBP1, MAPK8IP3, GNAS, TNK2, DST	325	646	19662	2.06032	0.615191	0.112526	3.43455
GOTERM_BP_DIRECT	GO:0007257~activation of JUN kinase activity	5	0.00940628	0.0025591	SPAG9, DAB2, DAB2IP, MAPK8IP3, MAP2K7	309	34	18082	8.60556	0.99142	0.493262	4.27338
GOTERM_BP_DIRECT	GO:0007275~multicellular organism development	31	0.0583189	0.00298049	NRP2, SHROOM3, PDGFA, ADCYAP1R1, RORB, MYT1, ZBTB18, DAB2, B3GNT5, ZSCAN21, PAK3, ITGAV, GPSM1, MTURN, ETL4, AGRN, DISC1, PITX2, ZFP423, DAB2IP, EGFL7, NTNG2, UBE2I, RACGAP1, ARHGAP24, SIRT1, ZFR, FYN, SPATA18, EBF2, EDA	309	1029	18082	1.76293	0.996085	0.499866	4.96036
GOTERM_CC_DIRECT	GO:0042383~sarcolemma	8	0.01505	0.00342931	ANK1, ANK3, GNAS, AGRN, TRIM72, CACNA1C, DST, CACNA1S	325	118	19662	4.10159	0.727061	0.134353	4.64084
GOTERM_MF_DIRECT	GO:0004672~protein kinase activity	19	0.0357438	0.00417098	RNASEL, MAK, MAPKAPK5, PNCK, CDK8, WNK2, CDKL3, UHMK1, DMPK, RPS6KA3, RPS6KA1, PAK3, FYN, SPEG, PIK3C3, HIPK4, TNK2, MAP2K7, TEC	296	531	17446	2.10894	0.919233	0.204468	5.98908
GOTERM_BP_DIRECT	GO:0043124~negative regulation of I-kappaB kinase/NF-kappaB signaling	5	0.00940628	0.00424664	DAB2IP, NFKBID, NLRX1, SIRT1, TNIP1	309	39	18082	7.50228	0.99963	0.584424	6.99667
GOTERM_CC_DIRECT	GO:0030018~Z disc	8	0.01505	0.00450567	ANK1, SORBS2, ANK3, LDB3, PPP3CB, MYL12A, CACNA1C, DST	325	124	19662	3.90313	0.81859	0.156925	6.05575
GOTERM_CC_DIRECT	GO:0016605~PML body	7	0.0131688	0.00512407	RPA1, EIF4ENIF1, RNF6, RNF4, TDG, UBE2I, SIRT1	325	96	19662	4.41135	0.856566	0.16183	6.85981
GOTERM_CC_DIRECT	GO:0045180~basal cortex	3	0.00564377	0.00538217	GCK, CLASP1, PHLDB2	325	7	19662	25.9279	0.869965	0.156332	7.19352
GOTERM_CC_DIRECT	GO:0005813~centrosome	16	0.0301001	0.00597334	C2CD3, NIN, MAK, MED12, PDE4D, TMEM67, PCGF5, CDC45, ZFYVE19, HSPB11, CLASP1, RANBP1, MDM1, DISC1, CALM1, IFT140	325	435	19662	2.22523	0.896138	0.159877	7.95367
GOTERM_CC_DIRECT	GO:0014069~postsynaptic density	11	0.0206938	0.00648926	DNM3, ANKS1B, P2RX4, GRIK2, FYN, SORBS2, GOPC, CACNA1C, RIMS1, DST, DISC1	325	239	19662	2.78445	0.914645	0.161198	8.61234
GOTERM_CC_DIRECT	GO:0005891~voltage-gated calcium channel complex	4	0.00752502	0.00694265	CACNA1G, PDE4D, CACNA1C, CACNA1S	325	24	19662	10.0831	0.928171	0.161017	9.18756
GOTERM_BP_DIRECT	GO:0043087~regulation of GTPase activity	6	0.0112875	0.00722912	DAB2IP, GAPVD1, SBF1, RASAL3, AGRN, RACGAP1	309	71	18082	4.94517	0.999999	0.740065	11.6322
GOTERM_CC_DIRECT	GO:0030425~dendrite	17	0.0319813	0.00760734	DAB2IP, NIN, GRIK2, WFS1, IL6ST, EIF5A, UBE2I, P2RX4, SORBS2, ANK3, GOPC, CACNA1G, TXNRD2, MAPK8IP3, GNAS, TNK2, CACNA1C	325	490	19662	2.09893	0.944233	0.165073	10.0248
GOTERM_CC_DIRECT	GO:0005794~Golgi apparatus	32	0.0602002	0.00792073	SLC9A8, NDST3, AFTPH, FGFRL1, APP, B3GNT5, CHST10, TMEM59, TBC1D14, EMID1, GOPC, SEC16A, GPSM1, GALNT15, CLASP1, MGAT4A, DNM3, CLN3, B4GALT2, MYO6, INPPL1, GABARAP, USP6NL, DRAM2, FAM198B, ZDHHC13, VAMP4, MAPK8IP3, RNF24, SPEF2, GNAS, PRNP	325	1190	19662	1.62685	0.950509	0.16207	10.4171
GOTERM_CC_DIRECT	GO:0030054~cell junction	22	0.0413876	0.00830394	SPECC1L, ANKS1B, FOCAD, SHROOM3, MTDH, GRIK2, ARHGAP24, RIMS1, P2RX4, HMCN1, SORBS2, ANK3, ITGAV, OTOF, GOPC, SH3KBP1, SDCBP, AGRN, TNK2, DST, NFIA, DISC1	325	718	19662	1.85371	0.957233	0.160636	10.8945
GOTERM_CC_DIRECT	GO:0005768~endosome	18	0.0338626	0.00918577	VPS29, CLN3, WDFY1, VIPAS39, ADCYAP1R1, ASTN1, UNC93B1, MTM1, APP, GAPVD1, PACSIN3, TMEM59, PAK3, FYN, PIK3C3, GNAS, DOPEY1, TNK2	325	544	19662	2.00179	0.969446	0.167726	11.9844
GOTERM_BP_DIRECT	GO:0050798~activated T cell proliferation	3	0.00564377	0.00961991	ITGAX, FYN, ITGAM	309	9	18082	19.5059	1	0.804438	15.1901
GOTERM_BP_DIRECT	GO:0010745~negative regulation of macrophage derived foam cell differentiation	3	0.00564377	0.0118905	PPARA, ITGAV, HBP1	309	10	18082	17.5553	1	0.842934	18.444
GOTERM_MF_DIRECT	GO:0005516~calmodulin binding	9	0.0169313	0.0124273	MYO6, ARPP21, WFS1, MAPKAPK5, PNCK, PHKA1, PPP3CB, KCNQ2, CACNA1C	296	182	17446	2.91458	0.999462	0.46599	16.8709
GOTERM_CC_DIRECT	GO:0005925~focal adhesion	14	0.0263376	0.0133297	ACTR3, DAB2, FOCAD, GNB2, SORBS2, ITGAV, SH3KBP1, FBLN7, SDCBP, CLASP1, ARHGAP24, PHLDB2, DST, MPRIP	325	391	19662	2.16619	0.993733	0.224018	16.9421
GOTERM_CC_DIRECT	GO:0005634~nucleus	119	0.223869	0.013918	CNOT8, STAT5A, EIF5A, ZFP639, RORB, FOXO3, CBFB, DMPK, GATA2, DAB2, ANK1, LOX, MAP2K7, DISC1, PITX2, RBFOX2, POLI, MYO6, VWA5A, PNCK, NUDT5, MED12, CDKL3, DCLRE1C, SPAG8, RBPMS, HUWE1, MGA, SDCBP, CELF2, NFE2L1, SMARCA1, DST, PPP5C, FIP1L1, CDV3, AFTPH, NFKBID, SSH3, MAPKAPK5, MYT1, UHMK1, ITGAM, PEG10, CEPT1, ITGAV, EMD, KANSL1, ZFP444, RNF6, RNF4, EBF2, IKBKG, TDG, GPATCH2, ZFP800, TNK2, PPARA,…	325	6019	19662	1.1961	0.994998	0.222975	17.6245
GOTERM_BP_DIRECT	GO:0043123~positive regulation of I-kappaB kinase/NF-kappaB signaling	8	0.01505	0.0140102	NOD2, MTDH, FYN, ZDHHC13, IKBKG, UBE2I, EDA, PPP5C	309	149	18082	3.1419	1	0.866739	21.3751
GOTERM_BP_DIRECT	GO:0006497~protein lipidation	3	0.00564377	0.0143707	ATG7, PIK3C3, WIPI2	309	11	18082	15.9594	1	0.853394	21.8637
GOTERM_MF_DIRECT	GO:0004674~protein serine/threonine kinase activity	15	0.0282188	0.0144748	MAK, MAPKAPK5, PNCK, CDK8, WNK2, CDKL3, UHMK1, DMPK, RPS6KA3, RPS6KA1, PAK3, SPEG, HIPK4, TNK2, MAP2K7	296	428	17446	2.06563	0.999846	0.490941	19.3815
GOTERM_CC_DIRECT	GO:0042995~cell projection	21	0.0395064	0.0146914	ANKS1B, DAB2IP, C2CD3, MYO6, INPPL1, MAK, LDB3, ARHGAP24, TMEM67, ACTR3, MTM1, RNF6, KIF7, HSPB11, SORBS2, ANK3, GOPC, MAPK8IP3, GNAS, GAMT, DST	325	712	19662	1.78436	0.996282	0.224539	18.5138
GOTERM_CC_DIRECT	GO:0016529~sarcoplasmic reticulum	5	0.00940628	0.0152884	ANK1, ANK3, MRVI1, CACNA1S, DMPK	325	58	19662	5.21538	0.997043	0.223689	19.1942
GOTERM_BP_DIRECT	GO:0051491~positive regulation of filopodium assembly	4	0.00752502	0.0154661	ACTR3, DNM3, AGRN, BCAS3	309	31	18082	7.55068	1	0.854804	23.3307
GOTERM_MF_DIRECT	GO:0051117~ATPase binding	6	0.0112875	0.0167563	ACTR3, ANK1, WFS1, UFD1L, RUVBL2, PDE4D	296	88	17446	4.01858	0.999962	0.516462	22.0956
GOTERM_CC_DIRECT	GO:0005905~clathrin-coated pit	5	0.00940628	0.0171307	DAB2, APP, MYO6, AP2A1, TNK2	325	60	19662	5.04154	0.998543	0.238257	21.2605
GOTERM_BP_DIRECT	GO:0006631~fatty acid metabolic process	8	0.01505	0.0176106	ELOVL1, PPARA, CREM, STAT5A, ACOT11, LYPLA2, OXSM, HADHB	309	156	18082	3.00091	1	0.872819	26.1279
GOTERM_BP_DIRECT	GO:0006886~intracellular protein transport	10	0.0188126	0.0182923	VPS29, SGSM2, AP2A1, GRIK2, VIPAS39, TBC1D14, UNC93B1, CHM, RIMS1, USP6NL	309	232	18082	2.52232	1	0.866901	26.9967
GOTERM_MF_DIRECT	GO:0031624~ubiquitin conjugating enzyme binding	4	0.00752502	0.0194552	PPARA, RNF4, GRIK2, TRIM72	296	34	17446	6.93402	0.999993	0.545473	25.1963
GOTERM_BP_DIRECT	GO:0051260~protein homooligomerization	9	0.0169313	0.0199167	P2RX4, SPAG9, APP, CCDC88C, GOPC, ATL3, FGFRL1, TRIM72, PRNP	309	197	18082	2.6734	1	0.874503	29.0285
GOTERM_MF_DIRECT	GO:0061630~ubiquitin protein ligase activity	9	0.0169313	0.0202046	PJA1, RNF6, JADE2, TRIM2, RNF4, MED12, CDK8, RNF24, TRIM72	296	199	17446	2.66559	0.999995	0.536053	26.0367
GOTERM_BP_DIRECT	GO:0001525~angiogenesis	10	0.0188126	0.0217022	THSD7A, NRP2, DAB2IP, EGFL7, PDGFA, ITGAV, PIK3R6, BCAS3, ARHGAP24, SIRT1	309	239	18082	2.44844	1	0.882868	31.2003
GOTERM_BP_DIRECT	GO:0016358~dendrite development	4	0.00752502	0.0230892	APP, MYO6, PAK3, MCF2	309	36	18082	6.50198	1	0.885704	32.844
GOTERM_BP_DIRECT	GO:0000226~microtubule cytoskeleton organization	6	0.0112875	0.0241472	SPECC1, VAMP4, CLASP1, PHLDB2, DISC1, GABARAP	309	96	18082	3.65736	1	0.884848	34.073
GOTERM_BP_DIRECT	GO:0006284~base-excision repair	4	0.00752502	0.0248174	RPA1, HUWE1, TDG, FEN1	309	37	18082	6.32625	1	0.880118	34.8405
GOTERM_BP_DIRECT	GO:0015031~protein transport	18	0.0338626	0.0256571	VPS29, EIF4ENIF1, AFTPH, MYO6, SLC15A2, VIPAS39, EIF5A, GABARAP, MTM1, DAB2, PEX1, HSPB11, AP2A1, ATG7, NUP210, GOPC, TOMM40L, DOPEY1	309	592	18082	1.77926	1	0.877368	35.7902
GOTERM_MF_DIRECT	GO:0008022~protein C-terminus binding	9	0.0169313	0.0261339	DAB2, PEX1, AP2A1, GOPC, MED12, SDCBP, UBE2I, MAP2K7, SIRT1	296	209	17446	2.53805	1	0.608495	32.3816
GOTERM_BP_DIRECT	GO:0060271~cilium morphogenesis	8	0.01505	0.0266533	ACTR3, TMEM67, C2CD3, HSPB11, SPEF2, ASAP1, DISC1, IFT140	309	170	18082	2.75378	1	0.876348	36.9
GOTERM_BP_DIRECT	GO:0006874~cellular calcium ion homeostasis	6	0.0112875	0.0281769	GRIK2, ITGAV, STIM2, CACNA1C, ATP13A4, DMPK	309	100	18082	3.51107	1	0.880332	38.5626
GOTERM_BP_DIRECT	GO:0006006~glucose metabolic process	5	0.00940628	0.028703	PPARA, WDTC1, GCK, INPPL1, CREM	309	68	18082	4.30278	1	0.875077	39.127
GOTERM_MF_DIRECT	GO:0003779~actin binding	12	0.0225751	0.0293405	ACTR3, NOD2, MYO6, SHROOM3, INPPL1, SSFA2, SSH3, HPCA, EMD, DST, TNNI1, MPRIP	296	338	17446	2.09252	1	0.630632	35.5978
GOTERM_BP_DIRECT	GO:0043525~positive regulation of neuron apoptotic process	5	0.00940628	0.0300747	GRIK2, PAK3, AGRN, FOXO3, MAP2K7	309	69	18082	4.24042	1	0.87757	40.5757
GOTERM_BP_DIRECT	GO:0045494~photoreceptor cell maintenance	4	0.00752502	0.030409	DRAM2, MAK, PCDH15, MDM1	309	40	18082	5.85178	1	0.871016	40.9238
GOTERM_CC_DIRECT	GO:0043234~protein complex	18	0.0338626	0.0318463	MYO6, MAPKAPK5, CDK8, MYL12A, WIPI2, CBFB, GATA2, NOD2, GNB2, AP2A1, KXD1, GOPC, TOMM40L, PPP3CB, KCNQ2, CACNA1C, FEN1, PPP5C	325	628	19662	1.73403	0.999995	0.386975	36.0906
GOTERM_BP_DIRECT	GO:0007420~brain development	9	0.0169313	0.0321235	B4GALT2, C2CD3, B3GNT5, HPCA, NCOA6, SRR, AK4, SMARCA1, PITX2	309	216	18082	2.43824	1	0.876409	42.6793
GOTERM_BP_DIRECT	GO:0001568~blood vessel development	5	0.00940628	0.0329326	CHD7, EGFL7, ITGAV, CHM, LOX	309	71	18082	4.12097	1	0.874174	43.4906
GOTERM_BP_DIRECT	GO:0010880~regulation of release of sequestered calcium ion into cytosol by sarcoplasmic reticulum	3	0.00564377	0.0332328	CHD7, PDE4D, CALM1	309	17	18082	10.3267	1	0.867951	43.7888
GOTERM_BP_DIRECT	GO:0046907~intracellular transport	3	0.00564377	0.0332328	AFTPH, RANBP1, DST	309	17	18082	10.3267	1	0.867951	43.7888
GOTERM_MF_DIRECT	GO:0001846~opsonin binding	2	0.00376251	0.0335337	ITGAV, ITGAM	296	2	17446	58.9392	1	0.660646	39.5885
GOTERM_MF_DIRECT	GO:0005245~voltage-gated calcium channel activity	4	0.00752502	0.0338359	ITGAV, CACNA1G, CACNA1C, CACNA1S	296	42	17446	5.61326	1	0.64516	39.867
GOTERM_BP_DIRECT	GO:0007628~adult walking behavior	4	0.00752502	0.0344735	CHD7, ATG7, PCDH15, CACNA1C	309	42	18082	5.57312	1	0.869428	45.0057
GOTERM_BP_DIRECT	GO:0006914~autophagy	7	0.0131688	0.034844	DRAM2, TMEM59, ATG7, GOPC, PIK3C3, WIPI2, GABARAP	309	142	18082	2.88468	1	0.864087	45.3643
GOTERM_BP_DIRECT	GO:0030036~actin cytoskeleton organization	7	0.0131688	0.034844	SPECC1L, CLN3, SHROOM3, PAK3, PDGFA, SPECC1, SDCBP	309	142	18082	2.88468	1	0.864087	45.3643
GOTERM_BP_DIRECT	GO:0090630~activation of GTPase activity	5	0.00940628	0.035944	SGSM2, TBC1D14, BCAS3, ARHGAP24, USP6NL	309	73	18082	4.00807	1	0.864573	46.416
GOTERM_BP_DIRECT	GO:0007409~axonogenesis	6	0.0112875	0.0362041	APP, PAK3, ANK3, NTNG2, LRRC55, DST	309	107	18082	3.28137	1	0.858651	46.6619
GOTERM_MF_DIRECT	GO:0001190~transcriptional activator activity, RNA polymerase II transcription factor binding	3	0.00564377	0.0364808	PPARA, MED12, NFE2L1	296	18	17446	9.8232	1	0.655388	42.2541
GOTERM_MF_DIRECT	GO:0050431~transforming growth factor beta binding	3	0.00564377	0.0364808	ITGAV, LTBP4, AGRN	296	18	17446	9.8232	1	0.655388	42.2541
GOTERM_BP_DIRECT	GO:0001678~cellular glucose homeostasis	3	0.00564377	0.0369739	GCK, MYT1, SIRT1	309	18	18082	9.75297	1	0.856783	47.3834
GOTERM_BP_DIRECT	GO:0007626~locomotory behavior	6	0.0112875	0.0374544	APP, B4GALT2, MYO6, CHD7, ASTN1, PCDH15	309	108	18082	3.25099	1	0.852793	47.829
GOTERM_CC_DIRECT	GO:0005654~nucleoplasm	43	0.080894	0.0387619	PPARA, AFTPH, SLC44A1, HELZ2, MAPKAPK5, STAT5A, ZFP639, FOXO3, MYT1, ZBTB18, RPA1, MTMR3, GATA2, JADE2, STAT4, MORC4, PACSIN3, HBP1, TNIP1, GEMIN7, FEN1, RBFOX2, MYO6, VWA5A, MED12, CDK8, UBE2I, RACGAP1, WIPI2, ZFR, SIRT1, RBPMS, SMTN, HUWE1, RNF4, GCK, NCOA6, TDG, MGA, RUVBL2, NFIA, MATR3, PPP5C	325	1935	19662	1.34441	1	0.437155	42.1241
GOTERM_BP_DIRECT	GO:0000045~autophagosome assembly	4	0.00752502	0.0388043	ATG7, PIK3C3, WIPI2, GABARAP	309	44	18082	5.3198	1	0.855443	49.0622
GOTERM_MF_DIRECT	GO:0001077~transcriptional activator activity, RNA polymerase II core promoter proximal region sequence-specific binding	10	0.0188126	0.0407375	GATA2, PPARA, ZSCAN21, STAT5A, EBF2, LEF1, ZFP639, ETV6, NFIA, PITX2	296	270	17446	2.18293	1	0.679563	45.9111
GOTERM_BP_DIRECT	GO:0055117~regulation of cardiac muscle contraction	3	0.00564377	0.0408681	P2RX4, AGRN, CALM1	309	19	18082	9.23965	1	0.862871	50.8945
GOTERM_CC_DIRECT	GO:0005741~mitochondrial outer membrane	7	0.0131688	0.0414009	SLC44A1, SPATA18, TOMM40L, NLRX1, PRNP, DMPK, HADHB	325	153	19662	2.7679	1	0.446754	44.2838
GOTERM_CC_DIRECT	GO:0097225~sperm midpiece	3	0.00564377	0.0423096	SLC26A6, SPEF2, GABARAP	325	20	19662	9.07477	1	0.442122	45.01
GOTERM_CC_DIRECT	GO:0005874~microtubule	11	0.0206938	0.0444069	DNM3, SHROOM3, NIN, TUBA4A, CLASP1, MID1, EMD, DST, DISC1, MDM1, GABARAP	325	327	19662	2.03512	1	0.446817	46.6527
GOTERM_BP_DIRECT	GO:0030517~negative regulation of axon extension	3	0.00564377	0.0449089	ACTR3, RNF6, CDKL3	309	20	18082	8.77767	1	0.881538	54.304
GOTERM_BP_DIRECT	GO:0070507~regulation of microtubule cytoskeleton organization	3	0.00564377	0.0449089	CLASP1, AGRN, PHLDB2	309	20	18082	8.77767	1	0.881538	54.304
GOTERM_BP_DIRECT	GO:0009791~post-embryonic development	6	0.0112875	0.0455088	INPPL1, ATG7, ZFX, MAPK8IP3, GNAS, MYT1	309	114	18082	3.07988	1	0.878712	54.7907
GOTERM_BP_DIRECT	GO:0016477~cell migration	8	0.01505	0.0455712	SPECC1L, CLN3, SORBS2, ITGAV, SH3KBP1, IL12A, ASTN1, TNK2	309	191	18082	2.45101	1	0.872833	54.8411
GOTERM_CC_DIRECT	GO:0070062~extracellular exosome	56	0.10535	0.0471412	SLC44A1, IL6ST, SLC15A2, LTBP4, EIF5A, ACTR3, JADE2, DAB2, APP, HMCN1, DNAJC13, PACSIN3, PEX1, TMEM59, ACOT11, DAB2IP, MYO6, NUDT5, MPP6, LYPLA2, SPAG9, GNB2, HUWE1, CD82, SDCBP, TUBA4A, RUVBL2, GNAS, PRNP, VPS29, MOB1A, MUM1L1, GNG12, ITGAM, HADHB, MTM1, ITGAV, RASAL3, CLASP1, AGRN, MGAT4A, DNM3, MCF2, PCDH15, AK4, MYL12A, RACGAP1, SERPINI1, CRYZ, THSD7A, P2RX4, HSPB11, FBLN7, ALDH2, GAMT, CALM1	325	2674	19662	1.26698	1	0.455798	48.7259
GOTERM_MF_DIRECT	GO:0030165~PDZ domain binding	6	0.0112875	0.0471541	SLC26A6, GRIK2, CCDC88C, SRR, MPP6, GNG12	296	116	17446	3.04858	1	0.71755	51.0176
GOTERM_BP_DIRECT	GO:0060548~negative regulation of cell death	5	0.00940628	0.0476976	RNF4, ADCYAP1R1, ATG7, SIRT1, PPP5C	309	80	18082	3.65736	1	0.878837	56.5256
GOTERM_MF_DIRECT	GO:0098641~cadherin binding involved in cell-cell adhesion	10	0.0188126	0.048368	DAB2IP, MYO6, GAPVD1, SDCBP, LYPLA2, ASAP1, RANBP1, EMD, PHLDB2, MPRIP	296	279	17446	2.11252	1	0.711642	51.9316
GOTERM_MF_DIRECT	GO:0047485~protein N-terminus binding	6	0.0112875	0.0486089	DAB2IP, SDCBP, EIF5A, PCDH15, KCNQ2, CALM1	296	117	17446	3.02252	1	0.698778	52.1111
GOTERM_CC_DIRECT	GO:0030659~cytoplasmic vesicle membrane	6	0.0112875	0.0486167	TMEM67, SLC26A6, ZDHHC13, SH3KBP1, TNK2, TRIM72	325	120	19662	3.02492	1	0.455401	49.8134
GOTERM_MF_DIRECT	GO:0086056~voltage-gated calcium channel activity involved in AV node cell action potential	2	0.00376251	0.0498778	CACNA1G, CACNA1C	296	3	17446	39.2928	1	0.69415	53.0463
GOTERM_MF_DIRECT	GO:0043398~HLH domain binding	2	0.00376251	0.0498778	UBE2I, SIRT1	296	3	17446	39.2928	1	0.69415	53.0463
GOTERM_CC_DIRECT	GO:0005930~axoneme	5	0.00940628	0.0500895	DNAH9, MAK, ATG7, GABARAP, IFT140	325	84	19662	3.6011	1	0.455025	50.8775
GOTERM_MF_DIRECT	GO:0017124~SH3 domain binding	6	0.0112875	0.05009	DAB2IP, INPPL1, PAK3, SH3KBP1, ASAP1, RIMS1	296	118	17446	2.99691	1	0.682019	53.201
GOTERM_BP_DIRECT	GO:0090400~stress-induced premature senescence	2	0.00376251	0.0502378	MAPKAPK5, SIRT1	309	3	18082	39.0119	1	0.886435	58.4604
GOTERM_BP_DIRECT	GO:0071899~negative regulation of estrogen receptor binding	2	0.00376251	0.0502378	LEF1, RUVBL2	309	3	18082	39.0119	1	0.886435	58.4604
GOTERM_BP_DIRECT	GO:0061153~trachea gland development	2	0.00376251	0.0502378	LEF1, EDA	309	3	18082	39.0119	1	0.886435	58.4604
GOTERM_BP_DIRECT	GO:1903690~negative regulation of wound healing, spreading of epidermal cells	2	0.00376251	0.0502378	CLASP1, PHLDB2	309	3	18082	39.0119	1	0.886435	58.4604
GOTERM_CC_DIRECT	GO:0032839~dendrite cytoplasm	3	0.00564377	0.0503505	GRIK2, HPCA, UHMK1	325	22	19662	8.24979	1	0.446652	51.0639
GOTERM_BP_DIRECT	GO:0060041~retina development in camera-type eye	5	0.00940628	0.0552601	CHD7, HPCA, RORB, MDM1, IFT140	309	84	18082	3.4832	1	0.904232	62.0496
GOTERM_MF_DIRECT	GO:0000287~magnesium ion binding	8	0.01505	0.0563942	RPS6KA3, RPS6KA1, GCK, NUDT5, SRR, ATP11C, MAP2K7, FEN1	296	202	17446	2.33423	1	0.712923	57.5862
GOTERM_MF_DIRECT	GO:0031435~mitogen-activated protein kinase kinase kinase binding	3	0.00564377	0.0571033	DAB2IP, MAPK8IP3, MAP2K7	296	23	17446	7.68772	1	0.70494	58.0548
GOTERM_BP_DIRECT	GO:0046856~phosphatidylinositol dephosphorylation	3	0.00564377	0.0578516	MTMR3, MTM1, INPPL1	309	23	18082	7.63276	1	0.9098	63.7854
GOTERM_BP_DIRECT	GO:0070509~calcium ion import	3	0.00564377	0.0578516	GCK, CACNA1G, CACNA1C	309	23	18082	7.63276	1	0.9098	63.7854
GOTERM_MF_DIRECT	GO:0019904~protein domain specific binding	10	0.0188126	0.0578758	PPARA, SORBS2, IKBKG, MED12, TDG, GNAS, ETV6, CACNA1C, SIRT1, CALM1	296	289	17446	2.03942	1	0.697701	58.5597
GOTERM_CC_DIRECT	GO:0043025~neuronal cell body	15	0.0282188	0.0597946	DAB2IP, MYO6, GRIK2, IL6ST, EIF5A, VGF, P2RX4, SORBS2, CACNA1G, SRR, TXNRD2, GNAS, TNK2, CACNA1C, PPP5C	325	534	19662	1.69939	1	0.496151	57.3828
GOTERM_BP_DIRECT	GO:0001764~neuron migration	6	0.0112875	0.0610616	NRP2, GATA2, FYN, ASTN1, DISC1, PITX2	309	124	18082	2.83151	1	0.917039	65.832
GOTERM_MF_DIRECT	GO:0051019~mitogen-activated protein kinase binding	3	0.00564377	0.0616176	MAPKAPK5, SIRT1, TNIP1	296	24	17446	7.3674	1	0.709173	60.9262
GOTERM_BP_DIRECT	GO:0007026~negative regulation of microtubule depolymerization	3	0.00564377	0.0624199	SPECC1L, CLASP1, MID1	309	24	18082	7.31472	1	0.917382	66.6648
GOTERM_BP_DIRECT	GO:0006520~cellular amino acid metabolic process	3	0.00564377	0.0624199	CLN3, ATG7, SRR	309	24	18082	7.31472	1	0.917382	66.6648
GOTERM_BP_DIRECT	GO:0016236~macroautophagy	3	0.00564377	0.0624199	CLN3, ATG7, PIK3C3	309	24	18082	7.31472	1	0.917382	66.6648
GOTERM_MF_DIRECT	GO:0019899~enzyme binding	12	0.0225751	0.0629311	NOD2, APP, ANK1, FYN, PPP3CB, TUBA4A, HLCS, UBE2I, CACNA1C, MAP2K7, SIRT1, UHMK1	296	384	17446	1.84185	1	0.70559	61.7266
GOTERM_CC_DIRECT	GO:0008305~integrin complex	3	0.00564377	0.063332	ITGAX, ITGAV, ITGAM	325	25	19662	7.25982	1	0.506684	59.5481
GOTERM_MF_DIRECT	GO:0070851~growth factor receptor binding	2	0.00376251	0.0659465	APP, FYN	296	4	17446	29.4696	1	0.711923	63.5066
GOTERM_MF_DIRECT	GO:0052629~phosphatidylinositol-3,5-bisphosphate 3-phosphatase activity	2	0.00376251	0.0659465	MTMR3, MTM1	296	4	17446	29.4696	1	0.711923	63.5066
GOTERM_MF_DIRECT	GO:0043027~cysteine-type endopeptidase inhibitor activity involved in apoptotic process	3	0.00564377	0.0662489	RPS6KA3, RPS6KA1, LEF1	296	25	17446	7.0727	1	0.702891	63.6808
GOTERM_BP_DIRECT	GO:0086045~membrane depolarization during AV node cell action potential	2	0.00376251	0.0664183	CACNA1G, CACNA1C	309	4	18082	29.2589	1	0.926068	69.0066
GOTERM_BP_DIRECT	GO:0002074~extraocular skeletal muscle development	2	0.00376251	0.0664183	CACNA1S, PITX2	309	4	18082	29.2589	1	0.926068	69.0066
GOTERM_BP_DIRECT	GO:2000619~negative regulation of histone H4-K16 acetylation	2	0.00376251	0.0664183	ATG7, SIRT1	309	4	18082	29.2589	1	0.926068	69.0066
GOTERM_BP_DIRECT	GO:0046854~phosphatidylinositol phosphorylation	3	0.00564377	0.0671062	PIK3C3, PIK3CD, PIK3R6	309	25	18082	7.02214	1	0.924217	69.3936
GOTERM_CC_DIRECT	GO:0048471~perinuclear region of cytoplasm	18	0.0338626	0.0673434	DNM3, MYO6, MTDH, MRVI1, LDB3, TPD52L2, GABARAP, ACTR3, P2RX4, SPAG9, DAB2, APP, GNB2, SORBS2, CACNA1G, GNAS, DST, DISC1	325	692	19662	1.57366	1	0.519074	61.8798
GOTERM_CC_DIRECT	GO:0030315~T-tubule	4	0.00752502	0.0676814	ANK3, PPP3CB, CACNA1C, CACNA1S	325	57	19662	4.24551	1	0.511277	62.0704
GOTERM_BP_DIRECT	GO:0045893~positive regulation of transcription, DNA-templated	16	0.0301001	0.0682877	ZFP423, PPARA, MED12, LEF1, RORB, FOXO3, DAB2, RNF6, RPS6KA1, RNF4, ZSCAN21, EBF2, NCOA6, SMARCA1, NFIA, PITX2	309	576	18082	1.62549	1	0.92388	70.0476
GOTERM_BP_DIRECT	GO:0001782~B cell homeostasis	3	0.00564377	0.0719049	IKBKG, SOS2, PIK3CD	309	26	18082	6.75205	1	0.930389	71.969
GOTERM_BP_DIRECT	GO:0035904~aorta development	3	0.00564377	0.0719049	CHD7, KIF7, LOX	309	26	18082	6.75205	1	0.930389	71.969
GOTERM_BP_DIRECT	GO:0050919~negative chemotaxis	3	0.00564377	0.0719049	NRP2, PDGFA, ITGAV	309	26	18082	6.75205	1	0.930389	71.969
GOTERM_BP_DIRECT	GO:0072661~protein targeting to plasma membrane	3	0.00564377	0.0719049	ANK1, ANK3, MYL12A	309	26	18082	6.75205	1	0.930389	71.969
GOTERM_CC_DIRECT	GO:0043231~intracellular membrane-bounded organelle	19	0.0357438	0.0744946	VPS29, EIF4ENIF1, AFTPH, MYO6, POLI, VGF, DAB2, RNF6, DRAM2, SLC26A6, APP, PEX1, DNAJC13, FYN, SPATA18, ZDHHC13, EDA, SLC14A1, PPP5C	325	751	19662	1.53059	1	0.537023	65.73
GOTERM_MF_DIRECT	GO:0043548~phosphatidylinositol 3-kinase binding	3	0.00564377	0.0758419	DAB2IP, FYN, CALM1	296	27	17446	6.5488	1	0.742465	68.8206
GOTERM_CC_DIRECT	GO:0045202~synapse	14	0.0263376	0.0760691	ANKS1B, P2RX4, DNM3, MYO6, GRIK2, ANK3, OTOF, GOPC, SH3KBP1, UBE2I, PCDH15, AGRN, RIMS1, DISC1	325	505	19662	1.67719	1	0.53552	66.5278
GOTERM_BP_DIRECT	GO:0030099~myeloid cell differentiation	3	0.00564377	0.076811	DAB2, NCOA6, CBFB	309	27	18082	6.50198	1	0.939206	74.3903
GOTERM_BP_DIRECT	GO:0090314~positive regulation of protein targeting to membrane	3	0.00564377	0.076811	ACTR3, ANK3, HPCA	309	27	18082	6.50198	1	0.939206	74.3903
GOTERM_BP_DIRECT	GO:0007029~endoplasmic reticulum organization	3	0.00564377	0.076811	ATL3, SEC16A, CACNA1S	309	27	18082	6.50198	1	0.939206	74.3903
GOTERM_BP_DIRECT	GO:0032007~negative regulation of TOR signaling	3	0.00564377	0.076811	MTM1, MAPKAPK5, SIRT1	309	27	18082	6.50198	1	0.939206	74.3903
GOTERM_CC_DIRECT	GO:0071339~MLL1 complex	3	0.00564377	0.0772975	KANSL1, MGA, RUVBL2	325	28	19662	6.48198	1	0.532445	67.1382
GOTERM_CC_DIRECT	GO:0005913~cell-cell adherens junction	10	0.0188126	0.0803111	DAB2IP, MYO6, GAPVD1, SDCBP, LYPLA2, ASAP1, RANBP1, EMD, PHLDB2, MPRIP	325	316	19662	1.91451	1	0.537845	68.5921
GOTERM_CC_DIRECT	GO:0005789~endoplasmic reticulum membrane	18	0.0338626	0.0808803	MTDH, ATL3, UNC93B1, STIM2, EIF5A, ATP11C, ATP13A4, DMPK, TMEM67, ELOVL1, CEPT1, OTOF, NUP210, GPSM1, SDCBP, NFE2L1, EDA, DST	325	710	19662	1.53376	1	0.531889	68.86
GOTERM_MF_DIRECT	GO:0046934~phosphatidylinositol-4,5-bisphosphate 3-kinase activity	2	0.00376251	0.0817443	PIK3CD, PIK3R6	296	5	17446	23.5757	1	0.759747	71.637
GOTERM_BP_DIRECT	GO:0043113~receptor clustering	3	0.00564377	0.0818195	GRIK2, AGRN, ARHGEF9	309	28	18082	6.26976	1	0.946895	76.6581
GOTERM_CC_DIRECT	GO:0005790~smooth endoplasmic reticulum	3	0.00564377	0.0821492	APP, MAPK8IP3, GABARAP	325	29	19662	6.25846	1	0.529304	69.4495
GOTERM_CC_DIRECT	GO:0032809~neuronal cell body membrane	3	0.00564377	0.0821492	DAB2IP, IL6ST, HPCA	325	29	19662	6.25846	1	0.529304	69.4495
GOTERM_BP_DIRECT	GO:0010891~negative regulation of sequestering of triglyceride	2	0.00376251	0.082324	PPARA, PNPLA2	309	5	18082	23.4071	1	0.945013	76.8757
GOTERM_BP_DIRECT	GO:0032369~negative regulation of lipid transport	2	0.00376251	0.082324	ITGAV, HBP1	309	5	18082	23.4071	1	0.945013	76.8757
GOTERM_BP_DIRECT	GO:1904261~positive regulation of basement membrane assembly involved in embryonic body morphogenesis	2	0.00376251	0.082324	CLASP1, PHLDB2	309	5	18082	23.4071	1	0.945013	76.8757
GOTERM_BP_DIRECT	GO:0002520~immune system development	2	0.00376251	0.082324	SPEF2, CACNA1C	309	5	18082	23.4071	1	0.945013	76.8757
GOTERM_MF_DIRECT	GO:0042803~protein homodimerization activity	20	0.0376251	0.0836037	ZFP423, DAB2IP, GRIK2, PDGFA, NUDT5, HLCS, MID1, RBPMS, RNF4, SULT1A1, ATG7, IKBKG, GOPC, SRR, TDG, TXNRD2, SDCBP, RUVBL2, GAMT, DST	296	798	17446	1.47717	1	0.758406	72.4739
GOTERM_MF_DIRECT	GO:0032403~protein complex binding	11	0.0206938	0.0839085	PPARA, DAB2IP, PEX1, GNB2, AP2A1, FYN, UFD1L, OTOF, PCDH15, DISC1, HADHB	296	358	17446	1.81098	1	0.750522	72.6089
GOTERM_MF_DIRECT	GO:0046875~ephrin receptor binding	3	0.00564377	0.0858424	ANKS1B, FYN, SDCBP	296	29	17446	6.09716	1	0.749778	73.451
GOTERM_BP_DIRECT	GO:0007605~sensory perception of sound	6	0.0112875	0.0872866	MYO6, CHD7, WFS1, OTOF, MPV17, PCDH15	309	138	18082	2.54425	1	0.951621	78.9171
GOTERM_BP_DIRECT	GO:0006470~protein dephosphorylation	6	0.0112875	0.0872866	MTMR3, MTM1, SSH3, PPP3CB, PPP5C, RNGTT	309	138	18082	2.54425	1	0.951621	78.9171
GOTERM_MF_DIRECT	GO:0016874~ligase activity	11	0.0206938	0.0880197	MKRN1, PJA1, RNF6, TRIM2, HUWE1, RNF4, HERC3, HLCS, UBE2I, GM15800, MID1	296	362	17446	1.79097	1	0.750091	74.3701
GOTERM_CC_DIRECT	GO:0044297~cell body	5	0.00940628	0.0882076	GNB2, IL6ST, CACNA1G, DISC1, GABARAP	325	102	19662	2.96561	1	0.547655	72.1238
GOTERM_CC_DIRECT	GO:0005776~autophagosome	4	0.00752502	0.0887832	CLN3, TBC1D14, WIPI2, GABARAP	325	64	19662	3.78115	1	0.542046	72.3663
GOTERM_MF_DIRECT	GO:0008289~lipid binding	9	0.0169313	0.0888457	PPARA, ZFYVE19, PEX1, PACSIN3, ACOT11, PSD4, RACGAP1, APOL11B, TEC	296	270	17446	1.96464	1	0.744911	74.711
GOTERM_BP_DIRECT	GO:0007283~spermatogenesis	12	0.0225751	0.0895903	SPAG8, SBF1, ZSCAN21, VIPAS39, SPATA18, ADCYAP1R1, CREM, ZFX, SPEF2, GAMT, RACGAP1, SIRT1	309	407	18082	1.72534	1	0.953013	79.806
GOTERM_CC_DIRECT	GO:0005938~cell cortex	6	0.0112875	0.0900914	HMCN1, GCK, RASAL3, CLASP1, ARHGEF9, DST	325	144	19662	2.52077	1	0.539671	72.9101
GOTERM_BP_DIRECT	GO:0042149~cellular response to glucose starvation	3	0.00564377	0.0921241	MTMR3, GCK, PIK3C3	309	30	18082	5.85178	1	0.954697	80.7428
GOTERM_CC_DIRECT	GO:0005765~lysosomal membrane	8	0.01505	0.0930121	CLN3, P2RX4, DRAM2, DNAJC13, GNB2, KXD1, TMEM59, ATP11C	325	234	19662	2.06832	1	0.543955	74.0885
GOTERM_BP_DIRECT	GO:0046777~protein autophosphorylation	7	0.0131688	0.093481	FYN, MAK, MAPKAPK5, PHKA1, HIPK4, WNK2, UHMK1	309	183	18082	2.23839	1	0.954453	81.2275
GOTERM_CC_DIRECT	GO:0014731~spectrin-associated cytoskeleton	2	0.00376251	0.0948978	ANK1, ANK3	325	6	19662	20.1662	1	0.54397	74.8238
GOTERM_BP_DIRECT	GO:0001934~positive regulation of protein phosphorylation	7	0.0131688	0.0951384	CLN3, DAB2, GNAS, AGRN, MAP2K7, SIRT1, MPRIP	309	184	18082	2.22622	1	0.954688	81.804
GOTERM_BP_DIRECT	GO:0045746~negative regulation of Notch signaling pathway	3	0.00564377	0.0974108	GATA2, PEAR1, EGFL7	309	31	18082	5.66301	1	0.955843	82.5674
GOTERM_BP_DIRECT	GO:0035058~nonmotile primary cilium assembly	3	0.00564377	0.0974108	C2CD3, PCDH15, DISC1	309	31	18082	5.66301	1	0.955843	82.5674
GOTERM_BP_DIRECT	GO:0006642~triglyceride mobilization	2	0.00376251	0.0979595	IL6ST, SIRT1	309	6	18082	19.5059	1	0.954402	82.7472
GOTERM_BP_DIRECT	GO:0060789~hair follicle placode formation	2	0.00376251	0.0979595	GNAS, EDA	309	6	18082	19.5059	1	0.954402	82.7472
GOTERM_BP_DIRECT	GO:0010830~regulation of myotube differentiation	2	0.00376251	0.0979595	RBM38, DMPK	309	6	18082	19.5059	1	0.954402	82.7472
GOTERM_BP_DIRECT	GO:2000651~positive regulation of sodium ion transmembrane transporter activity	2	0.00376251	0.0979595	ANK3, WNK2	309	6	18082	19.5059	1	0.954402	82.7472
GOTERM_CC_DIRECT	GO:0001725~stress fiber	4	0.00752502	0.098573	SIPA1L3, MYL12A, DST, MPRIP	325	67	19662	3.61185	1	0.550922	76.2017
GOTERM_BP_DIRECT	GO:0000209~protein polyubiquitination	5	0.00940628	0.0992679	MKRN1, JADE2, HUWE1, RNF24, CBFB	309	103	18082	2.84067	1	0.954117	83.1687
GOTERM_MF_DIRECT	GO:0008270~zinc ion binding	25	0.0470314	0.0995971	MKRN1, APOBEC2, PPARA, RNPEPL1, RORB, MYT1, TRIM72, GM21992, GATA2, PCGF5, PEG10, TRIM2, JADE2, MORC4, LDB3, MID1, CRYZ, ZFR, P2RX4, PJA1, RNF6, RNF4, ZDHHC13, RNF24, MATR3	296	1075	17446	1.37068	1	0.777705	78.7792

## Sheet: GO terms used for mapping
	Supplemental Table S14. Go pathways used for mapping in the 6yes9yes group
Category	Term	Count	%	PValue	Genes	List Total	Pop Hits	Pop Total	Fold Enrichment	Bonferroni	Benjamini	FDR
GOTERM_BP_DIRECT	positive regulation of transcription from RNA polymerase II promoter	37	0.0696064	1.68049e-05	PPARA, RNASEL, HELZ2, CREM, STAT5A, ZFP639, FOXO3, MYT1, CBFB, PCGF5, GATA2, NOD2, APP, STAT4, CHD7, ZSCAN21, PPP3CB, AGRN, ETV6, BCAS3, TNIP1, PITX2, DAB2IP, MYO6, MED12, LEF1, SIRT1, RPS6KA3, SPAG8, RPS6KA1, RNF4, EBF2, IKBKG, NCOA6, RUVBL2, NFE2L1, NFIA	309	995	18082	2.17604	0.0307251	0.0307251	0.0286389
GOTERM_BP_DIRECT	cell differentiation	30	0.0564377	7.18294e-05	NRP2, VIPAS39, ADCYAP1R1, MYT1, RIMS1, GATA2, DAB2, PEG10, ZSCAN21, SPEG, ITGAV, GPSM1, AGRN, ETV6, TEC, ZFP423, EGFL7, PIK3CD, NTNG2, ARHGAP24, RACGAP1, SIRT1, THSD7A, SPAG8, HUWE1, SPATA18, RBM38, TNK2, EDA, PMP22	309	780	18082	2.25068	0.124878	0.0645204	0.122357
GOTERM_BP_DIRECT	endocytosis	11	0.0206938	0.00110879	CLN3, DNM3, DAB2, APP, MYO6, GAPVD1, PACSIN3, AP2A1, INPPL1, SH3KBP1, TNK2	309	181	18082	3.55633	0.872568	0.402525	1.87314
GOTERM_BP_DIRECT	phosphorylation	22	0.0413876	0.00194293	MAK, MAPKAPK5, PNCK, PIK3CD, PIP5K1B, CDK8, WNK2, AK4, CDKL3, UHMK1, DMPK, RPS6KA3, RPS6KA1, GCK, PAK3, FYN, SPEG, PIK3C3, HIPK4, TNK2, MAP2K7, TEC	309	612	18082	2.10358	0.97299	0.452243	3.26047
GOTERM_BP_DIRECT	activation of JUN kinase activity	5	0.00940628	0.0025591	SPAG9, DAB2, DAB2IP, MAPK8IP3, MAP2K7	309	34	18082	8.60556	0.99142	0.493262	4.27338
GOTERM_BP_DIRECT	negative regulation of I-kappaB kinase/NF-kappaB signaling	5	0.00940628	0.00424664	DAB2IP, NFKBID, NLRX1, SIRT1, TNIP1	309	39	18082	7.50228	0.99963	0.584424	6.99667
GOTERM_BP_DIRECT	regulation of GTPase activity	6	0.0112875	0.00722912	DAB2IP, GAPVD1, SBF1, RASAL3, AGRN, RACGAP1	309	71	18082	4.94517	0.999999	0.740065	11.6322
GOTERM_BP_DIRECT	activated T cell proliferation	3	0.00564377	0.00961991	ITGAX, FYN, ITGAM	309	9	18082	19.5059	1	0.804438	15.1901
GOTERM_CC_DIRECT	axon	18	0.0338626	0.000149918	NRP2, DNM3, DAB2IP, MYO6, NIN, GRIK2, NTNG2, SIRT1, UHMK1, P2RX4, RNF6, APP, ANK3, ATG7, HPCA, TXNRD2, TNK2, DISC1	325	370	19662	2.94317	0.0550971	0.0187137	0.207185
GOTERM_CC_DIRECT	apical part of cell	9	0.0169313	0.000640639	P2RX4, APP, MYO6, SHROOM3, NIN, OTOF, SRR, SIPA1L3, EDA	325	115	19662	4.73466	0.215132	0.0587625	0.882574
GOTERM_CC_DIRECT	cytoskeleton	34	0.0639627	0.000814421	SHROOM3, SSH3, ACTR3, NOD2, ZFYVE19, ANK1, ANK3, SORBS2, CLASP1, BCAS3, DISC1, TEC, SPECC1L, DNM3, C2CD3, NIN, MAK, INPPL1, LDB3, PDE4D, TBCEL, RACGAP1, ARHGAP24, MID1, GABARAP, MPRIP, TMEM67, SPAG8, SMTN, SH3KBP1, TUBA4A, SDCBP, DST, MDM1	325	1113	19662	1.84811	0.265067	0.0597367	1.12074
GOTERM_CC_DIRECT	Golgi membrane	17	0.0319813	0.00112937	MGAT4A, SLC9A8, CLN3, NDST3, GABARAP, ACTR3, FAM198B, B3GNT5, CHST10, TMEM59, ZDHHC13, GOPC, SEC16A, GALNT15, GPSM1, RNF24, MAPK8IP3	325	403	19662	2.55204	0.347629	0.0591958	1.551
GOTERM_CC_DIRECT	cytoplasmic vesicle	22	0.0413876	0.00252329	CLN3, MYO6, VIPAS39, ASTN1, UNC93B1, VGF, TRIM72, RACGAP1, GABARAP, USP6NL, DAB2, SPAG8, SLC26A6, APP, OTOF, ZDHHC13, PIK3C3, SH3KBP1, MAPK8IP3, GNAS, TNK2, DST	325	646	19662	2.06032	0.615191	0.112526	3.43455
GOTERM_CC_DIRECT	postsynaptic density	11	0.0206938	0.00648926	DNM3, ANKS1B, P2RX4, GRIK2, FYN, SORBS2, GOPC, CACNA1C, RIMS1, DST, DISC1	325	239	19662	2.78445	0.914645	0.161198	8.61234
GOTERM_CC_DIRECT	voltage-gated calcium channel complex	4	0.00752502	0.00694265	CACNA1G, PDE4D, CACNA1C, CACNA1S	325	24	19662	10.0831	0.928171	0.161017	9.18756
GOTERM_CC_DIRECT	dendrite	17	0.0319813	0.00760734	DAB2IP, NIN, GRIK2, WFS1, IL6ST, EIF5A, UBE2I, P2RX4, SORBS2, ANK3, GOPC, CACNA1G, TXNRD2, MAPK8IP3, GNAS, TNK2, CACNA1C	325	490	19662	2.09893	0.944233	0.165073	10.0248
GOTERM_CC_DIRECT	Golgi apparatus	32	0.0602002	0.00792073	SLC9A8, NDST3, AFTPH, FGFRL1, APP, B3GNT5, CHST10, TMEM59, TBC1D14, EMID1, GOPC, SEC16A, GPSM1, GALNT15, CLASP1, MGAT4A, DNM3, CLN3, B4GALT2, MYO6, INPPL1, GABARAP, USP6NL, DRAM2, FAM198B, ZDHHC13, VAMP4, MAPK8IP3, RNF24, SPEF2, GNAS, PRNP	325	1190	19662	1.62685	0.950509	0.16207	10.4171
GOTERM_CC_DIRECT	cell junction	22	0.0413876	0.00830394	SPECC1L, ANKS1B, FOCAD, SHROOM3, MTDH, GRIK2, ARHGAP24, RIMS1, P2RX4, HMCN1, SORBS2, ANK3, ITGAV, OTOF, GOPC, SH3KBP1, SDCBP, AGRN, TNK2, DST, NFIA, DISC1	325	718	19662	1.85371	0.957233	0.160636	10.8945
GOTERM_MF_DIRECT	metal ion binding	84	0.158025	0.000119905	NRP2, APOBEC2, MKRN1, PPARA, RNASEL, CNOT8, ADCY7, HELZ2, ZFP639, RORB, DMPK, PCGF5, GATA2, JADE2, APP, TRIM2, ZFYVE19, PAK3, LOX, MAP2K7, NDUFS1, ZFP423, POLI, ZFX, NUDT5, STIM2, LDB3, PDE4D, ZFR, PJA1, RNF24, GNAS, PRNP, DST, MATR3, PPP5C, VPS29, ZFP65, MOB1A, YPEL3, ASAP1, TRIM72, MYT1, RIMS1, ZBTB18, ITGAM, RPA1, MTMR3, PEG10, CEPT1, ITGAX, MORC4, SORBS2, ZSCAN21, ITGAV, GALNT15, SRR, PPP3CB,…	296	3355	17446	1.47568	0.0696432	0.03545	0.177025
GOTERM_MF_DIRECT	kinase activity	26	0.0489126	0.00020909	MAPKAPK5, PHKA1, PIP5K1B, UHMK1, DMPK, PACSIN3, PAK3, SPEG, PIK3C3, MAP2K7, TEC, MAK, PNCK, PIK3CD, CDK8, WNK2, AK4, CDKL3, RPS6KA3, GCK, RPS6KA1, FYN, IKBKG, MAPK8IP3, HIPK4, TNK2	296	674	17446	2.27362	0.118284	0.0410936	0.308506
GOTERM_MF_DIRECT	nucleotide binding	54	0.101588	0.000270178	RNASEL, ADCY7, HELZ2, ATL3, PIP5K1B, HLCS, RNGTT, DMPK, ACTR3, NOD2, PEX1, PAK3, SULT1A1, PIK3C3, MAP2K7, RBFOX2, MYO6, PNCK, PIK3CD, CDK8, UBE2I, WNK2, CDKL3, RBPMS, HIPK4, CELF2, TUBA4A, GNAS, RUVBL2, RBM38, SMARCA1, MATR3, MAPKAPK5, NLRX1, UHMK1, GM21992, MOV10, CHD7, KIF7, SPEG, SRR, TEC, DNM3, NIN, MAK, AK4, ATP11C, ATP13A4, TRNT1, RPS6KA3, RPS6KA1, GCK, FYN, TNK2	296	1936	17446	1.64396	0.150128	0.0398515	0.398472
GOTERM_MF_DIRECT	ATP binding	44	0.0827752	0.000475243	RNASEL, DNAH9, ADCY7, HELZ2, MAPKAPK5, PIP5K1B, NLRX1, HLCS, UHMK1, DMPK, ACTR3, MOV10, NOD2, CHD7, KIF7, PEX1, SPEG, PAK3, PIK3C3, SRR, MAP2K7, TEC, MYO6, MAK, PNCK, PIK3CD, CDK8, UBE2I, WNK2, AK4, ATP11C, CDKL3, ATP13A4, TRNT1, P2RX4, RPS6KA3, RPS6KA1, GCK, FYN, HIPK4, RUVBL2, TNK2, SMARCA1, PPP5C	296	1507	17446	1.72085	0.248861	0.0556259	0.699924
GOTERM_MF_DIRECT	transferase activity	43	0.080894	0.000556054	NDST3, MAPKAPK5, TRMT2B, PIP5K1B, GSTM6, UHMK1, DMPK, HADHB, RNGTT, ELOVL1, NSUN6, CEPT1, B3GNT5, CHST10, SPEG, PAK3, SULT1A1, PIK3C3, GALNT15, MAP2K7, TEC, MGAT4A, POLI, B4GALT2, MAK, PNCK, PIK3CD, NUDT5, CDK8, WNK2, AK4, CDKL3, OXSM, TRNT1, RPS6KA3, RPS6KA1, HUWE1, GCK, FYN, ZDHHC13, HIPK4, GAMT, TNK2	296	1472	17446	1.72173	0.284546	0.0542777	0.818484
GOTERM_MF_DIRECT	ion channel binding	9	0.0169313	0.000995027	FYN, ANK3, GOPC, PDE4D, AGRN, PRNP, CACNA1C, RIMS1, CALM1	296	120	17446	4.42044	0.450806	0.0820523	1.46021
GOTERM_MF_DIRECT	microtubule binding	11	0.0206938	0.00219733	DNM3, SPAG8, KIF7, CLASP1, MID1, PRNP, RACGAP1, DST, MDM1, GABARAP, PPP5C	296	200	17446	3.24166	0.733997	0.136826	3.19809
GOTERM_MF_DIRECT	GTPase activator activity	12	0.0225751	0.00226612	DAB2IP, GAPVD1, SGSM2, TBC1D14, RASAL3, CHM, SIPA1L3, ASAP1, RANBP1, RACGAP1, ARHGAP24, USP6NL	296	235	17446	3.00966	0.744812	0.127659	3.29665
GOTERM_MF_DIRECT	protein kinase activity	19	0.0357438	0.00417098	RNASEL, MAK, MAPKAPK5, PNCK, CDK8, WNK2, CDKL3, UHMK1, DMPK, RPS6KA3, RPS6KA1, PAK3, FYN, SPEG, PIK3C3, HIPK4, TNK2, MAP2K7, TEC	296	531	17446	2.10894	0.919233	0.204468	5.98908

## Sheet: All KEGG terms
Supplemental Table S14. All KEGG pathways in the 6yes9yes group
Category	Term	Count	%	PValue	Genes	List Total	Pop Hits	Pop Total	Fold Enrichment	Bonferroni	Benjamini	FDR
KEGG_PATHWAY	mmu04010:MAPK signaling pathway	14	0.0263376	0.00058418	RPS6KA3, RPS6KA1, PDGFA, MAPKAPK5, IKBKG, SOS2, PPP3CB, CACNA1G, MAPK8IP3, GNG12, CACNA1C, MAP2K7, CACNA1S, PPP5C	140	251	7691	3.06414	0.117548	0.117548	0.737797
KEGG_PATHWAY	mmu04713:Circadian entrainment	8	0.01505	0.00190657	ADCY7, GNB2, ADCYAP1R1, CACNA1G, GNAS, GNG12, CACNA1C, CALM1	140	98	7691	4.48455	0.335284	0.184699	2.38944
KEGG_PATHWAY	mmu04660:T cell receptor signaling pathway	8	0.01505	0.00226662	FYN, PAK3, IKBKG, SOS2, PIK3CD, PPP3CB, MAP2K7, TEC	140	101	7691	4.35134	0.384677	0.149448	2.83474
KEGG_PATHWAY	mmu04725:Cholinergic synapse	8	0.01505	0.00425676	ADCY7, GNB2, FYN, PIK3CD, GNG12, KCNQ2, CACNA1C, CACNA1S	140	113	7691	3.88925	0.598638	0.204053	5.26246
KEGG_PATHWAY	mmu04912:GnRH signaling pathway	7	0.0131688	0.00503781	ADCY7, SOS2, GNAS, CACNA1C, MAP2K7, CACNA1S, CALM1	140	88	7691	4.36989	0.660681	0.194396	6.19989
KEGG_PATHWAY	mmu04810:Regulation of actin cytoskeleton	11	0.0206938	0.00511047	ITGAX, PAK3, PDGFA, ITGAV, SSH3, SOS2, PIK3CD, PIP5K1B, GNG12, MYL12A, ITGAM	140	213	7691	2.83706	0.665944	0.167016	6.28667
KEGG_PATHWAY	mmu04020:Calcium signaling pathway	10	0.0188126	0.005207	P2RX4, ADCY7, PHKA1, STIM2, PPP3CB, CACNA1G, GNAS, CACNA1C, CACNA1S, CALM1	140	180	7691	3.05198	0.672808	0.147516	6.40182
KEGG_PATHWAY	mmu04070:Phosphatidylinositol signaling system	7	0.0131688	0.00805326	MTMR3, MTM1, INPPL1, PIK3C3, PIK3CD, PIP5K1B, CALM1	140	97	7691	3.96443	0.822782	0.194504	9.73947
KEGG_PATHWAY	mmu00562:Inositol phosphate metabolism	6	0.0112875	0.00848105	MTMR3, MTM1, INPPL1, PIK3C3, PIK3CD, PIP5K1B	140	70	7691	4.70878	0.838409	0.18333	10.2315
KEGG_PATHWAY	mmu04924:Renin secretion	6	0.0112875	0.0089941	ADCYAP1R1, PPP3CB, GNAS, CACNA1C, CACNA1S, CALM1	140	71	7691	4.64245	0.855351	0.175802	10.8184
KEGG_PATHWAY	mmu04922:Glucagon signaling pathway	7	0.0131688	0.0092986	PPARA, GCK, PHKA1, PPP3CB, GNAS, SIRT1, CALM1	140	100	7691	3.8455	0.864558	0.166187	11.165
KEGG_PATHWAY	mmu05414:Dilated cardiomyopathy	6	0.0112875	0.0169043	ADCY7, ITGAV, GNAS, CACNA1C, EMD, CACNA1S	140	83	7691	3.97126	0.973968	0.262166	19.4309
KEGG_PATHWAY	mmu04724:Glutamatergic synapse	7	0.0131688	0.0176441	ADCY7, GNB2, GRIK2, PPP3CB, GNAS, GNG12, CACNA1C	140	115	7691	3.34391	0.977842	0.254009	20.1959
KEGG_PATHWAY	mmu05221:Acute myeloid leukemia	5	0.00940628	0.0181683	STAT5A, IKBKG, SOS2, PIK3CD, LEF1	140	56	7691	4.90497	0.980233	0.24442	20.7339
KEGG_PATHWAY	mmu04925:Aldosterone synthesis and secretion	6	0.0112875	0.0194306	ADCY7, CACNA1G, GNAS, CACNA1C, CACNA1S, CALM1	140	86	7691	3.83272	0.984991	0.24417	22.0157
KEGG_PATHWAY	mmu04911:Insulin secretion	6	0.0112875	0.0194306	ADCY7, GCK, ADCYAP1R1, GNAS, CACNA1C, CACNA1S	140	86	7691	3.83272	0.984991	0.24417	22.0157
KEGG_PATHWAY	mmu04727:GABAergic synapse	6	0.0112875	0.020325	ADCY7, GNB2, GNG12, CACNA1C, CACNA1S, GABARAP	140	87	7691	3.78867	0.987653	0.24016	22.9123
KEGG_PATHWAY	mmu04722:Neurotrophin signaling pathway	7	0.0131688	0.0229008	RPS6KA3, RPS6KA1, SOS2, PIK3CD, FOXO3, MAP2K7, CALM1	140	122	7691	3.15205	0.992971	0.252957	25.4418
KEGG_PATHWAY	mmu04024:cAMP signaling pathway	9	0.0169313	0.0261053	PPARA, ADCY7, ADCYAP1R1, PIK3CD, GNAS, PDE4D, CACNA1C, CACNA1S, CALM1	140	197	7691	2.50975	0.99652	0.269836	28.4819
KEGG_PATHWAY	mmu04720:Long-term potentiation	5	0.00940628	0.0310838	RPS6KA3, RPS6KA1, PPP3CB, CACNA1C, CALM1	140	66	7691	4.1618	0.998838	0.299288	32.9793
KEGG_PATHWAY	mmu05031:Amphetamine addiction	5	0.00940628	0.0326088	PPP3CB, GNAS, CACNA1C, SIRT1, CALM1	140	67	7691	4.09968	0.99917	0.298637	34.3039
KEGG_PATHWAY	mmu05412:Arrhythmogenic right ventricular cardiomyopathy (ARVC)	5	0.00940628	0.0326088	ITGAV, LEF1, CACNA1C, EMD, CACNA1S	140	67	7691	4.09968	0.99917	0.298637	34.3039
KEGG_PATHWAY	mmu04662:B cell receptor signaling pathway	5	0.00940628	0.0374437	INPPL1, IKBKG, SOS2, PIK3CD, PPP3CB	140	70	7691	3.92398	0.999716	0.322195	38.3456
KEGG_PATHWAY	mmu04723:Retrograde endocannabinoid signaling	6	0.0112875	0.0384081	ADCY7, GNB2, GNG12, CACNA1C, RIMS1, CACNA1S	140	103	7691	3.20014	0.999771	0.316801	39.1239
KEGG_PATHWAY	mmu04917:Prolactin signaling pathway	5	0.00940628	0.0426697	GCK, STAT5A, SOS2, PIK3CD, FOXO3	140	73	7691	3.76272	0.999911	0.333512	42.4558
KEGG_PATHWAY	mmu04261:Adrenergic signaling in cardiomyocytes	7	0.0131688	0.0434352	MYL4, ADCY7, CREM, GNAS, CACNA1C, CACNA1S, CALM1	140	142	7691	2.7081	0.999925	0.326966	43.0362
KEGG_PATHWAY	mmu00780:Biotin metabolism	2	0.00376251	0.053252	HLCS, OXSM	140	3	7691	36.6238	0.999992	0.374011	50.0167
KEGG_PATHWAY	mmu04014:Ras signaling pathway	9	0.0169313	0.0553036	GNB2, PAK3, PDGFA, IKBKG, SOS2, RASAL3, PIK3CD, GNG12, CALM1	140	229	7691	2.15905	0.999995	0.373911	51.3721
KEGG_PATHWAY	mmu04930:Type II diabetes mellitus	4	0.00752502	0.061202	GCK, PIK3CD, CACNA1G, CACNA1C	140	50	7691	4.39486	0.999999	0.39381	55.0827
KEGG_PATHWAY	mmu04062:Chemokine signaling pathway	8	0.01505	0.0643172	CCL25, ADCY7, GNB2, IKBKG, SOS2, PIK3CD, GNG12, FOXO3	140	196	7691	2.24227	0.999999	0.398355	56.9353
KEGG_PATHWAY	mmu05213:Endometrial cancer	4	0.00752502	0.0672638	SOS2, PIK3CD, LEF1, FOXO3	140	52	7691	4.22582	1	0.401807	58.6227
KEGG_PATHWAY	mmu04540:Gap junction	5	0.00940628	0.0698114	ADCY7, PDGFA, SOS2, TUBA4A, GNAS	140	86	7691	3.19394	1	0.40323	60.0323
KEGG_PATHWAY	mmu04012:ErbB signaling pathway	5	0.00940628	0.0721963	PAK3, STAT5A, SOS2, PIK3CD, MAP2K7	140	87	7691	3.15722	1	0.403868	61.3117
KEGG_PATHWAY	mmu05215:Prostate cancer	5	0.00940628	0.0746225	PDGFA, IKBKG, SOS2, PIK3CD, LEF1	140	88	7691	3.12135	1	0.40467	62.5744
KEGG_PATHWAY	mmu04380:Osteoclast differentiation	6	0.0112875	0.0776585	FYN, IKBKG, PIK3CD, PPP3CB, MAP2K7, TEC	140	126	7691	2.61599	1	0.407991	64.101
KEGG_PATHWAY	mmu04140:Regulation of autophagy	3	0.00564377	0.0795035	ATG7, PIK3C3, GABARAP	140	26	7691	6.33874	1	0.406322	65.0005
KEGG_PATHWAY	mmu04270:Vascular smooth muscle contraction	6	0.0112875	0.0797247	ADCY7, MRVI1, GNAS, CACNA1C, CACNA1S, CALM1	140	127	7691	2.59539	1	0.398296	65.1069
KEGG_PATHWAY	mmu04923:Regulation of lipolysis in adipocytes	4	0.00752502	0.0835521	ADCY7, PIK3CD, GNAS, PNPLA2	140	57	7691	3.85514	1	0.404678	66.902
KEGG_PATHWAY	mmu05032:Morphine addiction	5	0.00940628	0.0873626	ADCY7, GNB2, GNAS, PDE4D, GNG12	140	93	7691	2.95353	1	0.410649	68.6043
KEGG_PATHWAY	mmu04726:Serotonergic synapse	6	0.0112875	0.0904939	APP, GNB2, GNAS, GNG12, CACNA1C, CACNA1S	140	132	7691	2.49708	1	0.413848	69.9424
KEGG_PATHWAY	mmu04728:Dopaminergic synapse	6	0.0112875	0.0950035	GNB2, PPP3CB, GNAS, GNG12, CACNA1C, CALM1	140	134	7691	2.45981	1	0.421752	71.7773
KEGG_PATHWAY	mmu05152:Tuberculosis	7	0.0131688	0.0989693	NOD2, ITGAX, PIK3C3, PPP3CB, IL12A, ITGAM, CALM1	140	176	7691	2.18494	1	0.427393	73.3052

## Sheet: KEGG terms used for mapping
	Supplemental Table S14. KEGG pathways used for mapping in the 6yes9yes group
Category	Term	Count	%	PValue	Genes	List Total	Pop Hits	Pop Total	Fold Enrichment	Bonferroni	Benjamini	FDR
KEGG_PATHWAY	mmu04010:MAPK signaling pathway	14	0.0263376	0.00058418	RPS6KA3, RPS6KA1, PDGFA, MAPKAPK5, IKBKG, SOS2, PPP3CB, CACNA1G, MAPK8IP3, GNG12, CACNA1C, MAP2K7, CACNA1S, PPP5C	140	251	7691	3.06414	0.117548	0.117548	0.737797
KEGG_PATHWAY	mmu04660:T cell receptor signaling pathway	8	0.01505	0.00226662	FYN, PAK3, IKBKG, SOS2, PIK3CD, PPP3CB, MAP2K7, TEC	140	101	7691	4.35134	0.384677	0.149448	2.83474
KEGG_PATHWAY	mmu04725:Cholinergic synapse	8	0.01505	0.00425676	ADCY7, GNB2, FYN, PIK3CD, GNG12, KCNQ2, CACNA1C, CACNA1S	140	113	7691	3.88925	0.598638	0.204053	5.26246
KEGG_PATHWAY	mmu04912:GnRH signaling pathway	7	0.0131688	0.00503781	ADCY7, SOS2, GNAS, CACNA1C, MAP2K7, CACNA1S, CALM1	140	88	7691	4.36989	0.660681	0.194396	6.19989
KEGG_PATHWAY	mmu04810:Regulation of actin cytoskeleton	11	0.0206938	0.00511047	ITGAX, PAK3, PDGFA, ITGAV, SSH3, SOS2, PIK3CD, PIP5K1B, GNG12, MYL12A, ITGAM	140	213	7691	2.83706	0.665944	0.167016	6.28667
KEGG_PATHWAY	mmu04020:Calcium signaling pathway	10	0.0188126	0.005207	P2RX4, ADCY7, PHKA1, STIM2, PPP3CB, CACNA1G, GNAS, CACNA1C, CACNA1S, CALM1	140	180	7691	3.05198	0.672808	0.147516	6.40182
KEGG_PATHWAY	mmu00562:Inositol phosphate metabolism	6	0.0112875	0.00848105	MTMR3, MTM1, INPPL1, PIK3C3, PIK3CD, PIP5K1B	140	70	7691	4.70878	0.838409	0.18333	10.2315
KEGG_PATHWAY	mmu04924:Renin secretion	6	0.0112875	0.0089941	ADCYAP1R1, PPP3CB, GNAS, CACNA1C, CACNA1S, CALM1	140	71	7691	4.64245	0.855351	0.175802	10.8184
KEGG_PATHWAY	mmu04922:Glucagon signaling pathway	7	0.0131688	0.0092986	PPARA, GCK, PHKA1, PPP3CB, GNAS, SIRT1, CALM1	140	100	7691	3.8455	0.864558	0.166187	11.165
KEGG_PATHWAY	mmu04724:Glutamatergic synapse	7	0.0131688	0.0176441	ADCY7, GNB2, GRIK2, PPP3CB, GNAS, GNG12, CACNA1C	140	115	7691	3.34391	0.977842	0.254009	20.1959
KEGG_PATHWAY	mmu04911:Insulin secretion	6	0.0112875	0.0194306	ADCY7, GCK, ADCYAP1R1, GNAS, CACNA1C, CACNA1S	140	86	7691	3.83272	0.984991	0.24417	22.0157
KEGG_PATHWAY	mmu04727:GABAergic synapse	6	0.0112875	0.020325	ADCY7, GNB2, GNG12, CACNA1C, CACNA1S, GABARAP	140	87	7691	3.78867	0.987653	0.24016	22.9123
KEGG_PATHWAY	mmu04722:Neurotrophin signaling pathway	7	0.0131688	0.0229008	RPS6KA3, RPS6KA1, SOS2, PIK3CD, FOXO3, MAP2K7, CALM1	140	122	7691	3.15205	0.992971	0.252957	25.4418
KEGG_PATHWAY	mmu04024:cAMP signaling pathway	9	0.0169313	0.0261053	PPARA, ADCY7, ADCYAP1R1, PIK3CD, GNAS, PDE4D, CACNA1C, CACNA1S, CALM1	140	197	7691	2.50975	0.99652	0.269836	28.4819
KEGG_PATHWAY	mmu04662:B cell receptor signaling pathway	5	0.00940628	0.0374437	INPPL1, IKBKG, SOS2, PIK3CD, PPP3CB	140	70	7691	3.92398	0.999716	0.322195	38.3456
